# Supplementary material for: On the development of diagnostic support algorithms based on CPET biosignals data via machine learning and wavelets
Source: PeerJ journal article supplement (doi:10.7717/peerj-cs.2474), 2025-01-30
Supplement: raw_data.zip [file Chosen.xlsx]

## Sheet: Folha1
Age	Weight	Height	Humidity	Temperature	Sex	ID	ID_test
44.4	59	163	59	22.3	1	486	486_1	ok	Subject_31
45.9	48.6	152	59	22.4	1	609	609_1	ok	Subject_32
46.8	57.3	160.5	60	22.1	1	651	651_1	ok	Subject_33
53.8	60.3	164	38.1	21.2	0	653	653_1	ok	Subject_34
53.9	66	165	34	20.3	0	756	756_1	ok	Subject_35
54.8	66	174	62	21.5	0	377	377_1	ok	Subject_36
55.4	52.5	163.3	44	25.3	0	245	245_3	ok	Subject_37
55.4	78	175.6	51	23.4	0	597	597_1	ok	Subject_38
55.5	61.5	168.8	44	21	0	598	598_1	ok	Subject_39
57.6	67	169	47	18.4	0	389	389_1	ok	Subject_40
58.5	64	157	35	21.5	1	755	755_1	ok	Subject_41
59.7	65.2	172	51	16.8	0	856	856_3	ok	Subject_42
61.3	102	185	56	20.5	0	390	390_1	ok	Subject_43
61.6	74	169	46	23.9	0	596	596_1	ok	Subject_44
63	83.5	171.5	48	22.2	0	296	296_1	ok	Subject_45
