# Supplementary material for: On the development of diagnostic support algorithms based on CPET biosignals data via machine learning and wavelets
Source: PeerJ journal article supplement (doi:10.7717/peerj-cs.2474), 2025-01-30
Supplement: raw_data.zip [file Subject01_BxB.xlsx]

## Sheet: Demographics
Gender:	Female
Age:	66
Height (cm):	161
Weight (kg):	104.7
BMI:	40
Condition:	HFrEF

## Sheet: Subject01_BxB
Time	METS	HR	V'O2	V'O2/kg	V'CO2	RER	V'E	VE/VO2	VE/VCO2	RR	VTex	VTin	Speed	Elev
min		1/min	L/min	(mL/min)/kg	L/min		L/min			1/min	L	L	mph	%
00:00	Rest
00:02	1.8		0.66	6.3	0.6	0.91	15	17	18.7	34.7	0.431		0	0
00:04	1.1	96	0.39	3.7	0.36	0.94	15	31.4	33.5	23.1	0.636	0.6	0	0
00:10	1	94	0.38	3.7	0.35	0.92	12	28.1	30.4	10.3	1.148	1.183	0	0
00:13	1.2	94	0.43	4.1	0.4	0.94	16	31.9	33.7	20.3	0.781	0.919	0	0
00:17	1.2	91	0.46	4.4	0.45	0.97	17	32.2	33.1	17.2	0.967	0.973	0	0
00:22	1.6	93	0.59	5.7	0.59	0.99	21	33.7	34	11	1.919	1.851	0	0
00:27	1.1	91	0.4	3.8	0.41	1.01	15	33.1	32.7	12	1.226	1.016	0	0
00:31	1	92	0.36	3.5	0.37	1.01	14	33.4	33.1	16.1	0.865	0.96	0	0
00:35	1	93	0.38	3.6	0.39	1.02	16	36.3	35.5	15.7	0.987	0.983	0	0
00:37	0.9	93	0.32	3	0.3	0.95	12	29.5	31.1	21.3	0.55	0.403	0	0
00:42	0.9	93	0.32	3.1	0.32	0.98	12	33	33.7	14.3	0.855	0.838	0	0
00:45	1	93	0.37	3.5	0.35	0.95	13	31	32.8	17.3	0.773	0.739	0	0
00:48	1	93	0.35	3.4	0.33	0.93	13	31.4	33.7	20.3	0.658	0.68	0	0
00:55	0.9	94	0.34	3.3	0.31	0.9	10	27.1	30.2	9.1	1.127	1.085	0	0
00:57	0.8	94	0.31	2.9	0.26	0.86	12	30.2	35.2	25.1	0.478	0.502	0	0
00:59	0.9	94	0.32	3.1	0.28	0.87	12	27.5	31.7	30.5	0.402	0.607	0	0
01:03	1.5	92	0.55	5.3	0.49	0.89	16	27	30.5	13.2	1.238	0.962	0	0
01:07	1.6	92	0.59	5.6	0.54	0.91	20	30.7	33.5	18.2	1.101	1.129	0	0
01:10	1.4	93	0.5	4.8	0.48	0.96	18	32.9	34.2	17.8	1.034	1.031	0	0
01:14	1.2	93	0.45	4.3	0.44	0.97	17	33.6	34.8	17.9	0.965	0.856	0	0
01:17	1	93	0.36	3.4	0.35	0.99	14	34.4	34.9	16.5	0.858	0.843	0	0
01:20	0.9	93	0.34	3.3	0.34	1	15	37.4	37.4	22.7	0.673	0.693	0	0
01:24	0.8	93	0.3	2.9	0.29	0.96	11	32.7	33.9	14.4	0.797	0.546	0	0
01:27	1	93	0.37	3.5	0.35	0.94	14	30.3	32.1	22	0.618	0.802	0	0
01:30	1.3	96	0.49	4.7	0.46	0.94	15	27.7	29.6	17.6	0.877	0.838	0	0
01:34	1.1	96	0.41	4	0.37	0.9	14	29.2	32.3	16.9	0.824	0.711	0	0
01:36	1.3	98	0.48	4.5	0.45	0.94	18	33.2	35.1	24.2	0.763	0.913	0	0
01:39	0.9	100	0.35	3.3	0.33	0.94	14	33.8	36	17.9	0.766	0.79	0	0
01:43	1.4	100	0.53	5	0.5	0.96	18	30.3	31.7	16.9	1.05	0.938	0	0
01:43	Test
01:46	1.3	100	0.48	4.6	0.46	0.97	18	32.9	34.1	19.5	0.918	0.793	0	0
01:49	1.6	100	0.57	5.5	0.56	0.98	22	34.3	34.9	20.8	1.051	0.992	0	0
01:52	1.4	98	0.5	4.8	0.5	1	21	36.3	36.1	23.2	0.893	0.862	0	0
01:54	1.4	100	0.51	4.8	0.51	1	20	35.4	35.3	22.5	0.908	0.847	2	0
01:57	1.3	100	0.49	4.7	0.5	1.02	21	36.3	35.6	24.3	0.848	0.815	2	0
01:59	1.4	102	0.53	5	0.53	1.01	20	34	33.7	21.7	0.936	0.804	2	0
02:02	1.3	102	0.47	4.5	0.47	1	18	32.4	32.4	21.1	0.837	0.804	2	0
02:05	1.2	102	0.45	4.3	0.43	0.96	17	31.8	33.1	24.4	0.7	0.669	2	0
02:07	1.2	102	0.44	4.2	0.4	0.92	15	29.2	31.7	22.5	0.679	0.565	2	0
02:10	1.2	96	0.44	4.2	0.41	0.92	16	30.8	33.6	25.1	0.656	0.688	2	0
02:12	1.6	96	0.59	5.7	0.54	0.91	20	29.1	31.9	22.6	0.871	0.867	2	0
02:15	1.7	96	0.64	6.1	0.58	0.91	20	28.5	31.3	20.9	0.976	0.97	2	0
02:18	1.8	96	0.68	6.5	0.61	0.91	22	29.3	32.3	21.6	1.027	0.961	2	0
02:21	1.8	101	0.65	6.2	0.59	0.9	22	29.2	32.5	24.1	0.9	0.911	2	0
02:23	1.9	101	0.7	6.7	0.63	0.9	24	29.9	33.3	23.2	1.016	0.947	2	0
02:26	1.9	102	0.7	6.7	0.63	0.9	23	29.3	32.6	20.6	1.109	1.044	2	0
02:29	2	102	0.73	7	0.66	0.89	24	29.3	32.8	20.3	1.17	1.117	2	0
02:32	1.9	103	0.71	6.8	0.62	0.87	22	28	32	21.6	1.031	0.983	2	0
02:35	2	103	0.72	6.9	0.63	0.87	22	27.5	31.8	21.4	1.043	1.025	2	0
02:37	2	103	0.75	7.2	0.63	0.84	23	26.8	31.9	24.4	0.934	0.895	2	0
02:40	2	103	0.74	7.1	0.62	0.84	22	26.3	31.4	23.4	0.942	0.934	2	0
02:42	2	103	0.73	7	0.61	0.83	23	26.9	32.6	26.1	0.867	0.917	2	0
02:45	2.5	103	0.93	8.9	0.75	0.8	26	25	31	23.6	1.092	0.923	2	0
02:47	2.1	103	0.76	7.3	0.61	0.8	22	25.3	31.7	25.5	0.864	0.839	2	0
02:50	2.4	103	0.87	8.3	0.7	0.8	24	24.6	30.7	22.9	1.045	0.995	2	0
02:52	2.7	103	0.99	9.5	0.79	0.79	27	24.2	30.5	23.5	1.129	1.078	2	0
02:55	2.6	103	0.95	9.1	0.76	0.8	27	25.1	31.4	23.9	1.11	1.089	2	0
02:57	2.5	103	0.9	8.6	0.72	0.8	25	25.1	31.2	23.6	1.066	1.035	2	0
03:00	2.5	103	0.92	8.8	0.74	0.8	25	24.7	30.8	21.8	1.152	1.055	2	0
03:02	2.3	103	0.86	8.2	0.69	0.8	24	24.6	30.8	25	0.954	0.962	2	0
03:05	2.4	103	0.89	8.5	0.71	0.8	24	24.4	30.5	18.6	1.279	1.111	2	0
03:09	2.8	103	1.04	10	0.83	0.79	27	23.7	29.8	19.6	1.371	1.325	2	0
03:11	2.7	104	0.98	9.3	0.78	0.8	26	24.2	30.3	22.4	1.167	1.167	2	0
03:14	2.7	104	0.97	9.3	0.79	0.81	26	24.3	30.1	21.8	1.195	1.13	2	0
03:17	2.8	105	1.01	9.7	0.82	0.81	27	24.5	30.3	22.3	1.223	1.148	2	0
03:19	2.7	105	1	9.6	0.81	0.81	28	25.1	31	25.9	1.085	1.124	2	0
03:22	2.3	105	0.84	8	0.66	0.79	23	24.5	30.9	23.6	0.977	0.914	2	0
03:24	2.9	105	1.06	10.1	0.84	0.8	27	23.4	29.3	23.8	1.148	1.101	2	0
03:27	2.9	106	1.07	10.2	0.86	0.81	28	23.9	29.5	22.2	1.256	1.208	2	0
03:29	2.9	107	1.05	10.1	0.86	0.81	29	24.9	30.6	22.5	1.277	1.202	2	0
03:32	2.8	107	1.04	9.9	0.85	0.81	28	24.7	30.3	22.8	1.233	1.169	2	0
03:35	2.8	108	1.02	9.8	0.84	0.82	27	24.4	29.6	22.1	1.238	1.227	2	0
03:37	2.9	108	1.05	10	0.86	0.82	30	25.5	31.1	25.5	1.156	1.138	2	0
03:40	2.9	110	1.07	10.2	0.89	0.83	29	25	30.2	22.3	1.307	1.184	2	0
03:43	2.7	110	1.01	9.6	0.84	0.84	28	25	29.9	21.9	1.259	1.207	2	0
03:45	2.9	111	1.05	10.1	0.89	0.84	30	25.6	30.4	23.8	1.242	1.261	2	0
03:48	2.9	111	1.07	10.3	0.9	0.84	29	24.7	29.5	24.1	1.211	1.152	2	0
03:50	2.9	113	1.05	10	0.9	0.85	29	25.3	29.7	24.4	1.199	1.237	2	2
03:53	3	113	1.09	10.4	0.93	0.85	30	25.2	29.6	23.3	1.289	1.227	2	2
03:55	2.8	114	1.04	10	0.9	0.86	29	25.8	29.8	23	1.278	1.289	2	2
03:58	2.9	114	1.07	10.2	0.92	0.87	31	26.2	30.3	23.6	1.293	1.258	2	2
04:00	2.9	115	1.07	10.2	0.92	0.86	29	25.2	29.4	23	1.282	1.261	2	2
04:03	2.8	115	1.02	9.7	0.89	0.88	28	25.4	29	20.8	1.353	1.361	2	2
04:06	3	116	1.09	10.4	0.94	0.87	31	26.1	30.1	23.9	1.297	1.305	2	2
04:08	2.9	116	1.05	10	0.91	0.87	29	25.5	29.3	24	1.224	1.208	2	2
04:11	2.9	116	1.07	10.2	0.93	0.87	30	25.4	29.3	23.9	1.252	1.216	2	2
04:13	3	116	1.1	10.6	0.96	0.87	31	26.1	30	24.4	1.291	1.249	2	2
04:16	3	117	1.09	10.5	0.95	0.87	31	25.9	29.8	24.1	1.289	1.245	2	2
04:18	3	117	1.11	10.6	0.97	0.87	32	26.5	30.4	25.4	1.271	1.298	2	2
04:20	3	118	1.11	10.6	0.97	0.87	32	26.5	30.3	27.5	1.173	1.21	2	2
04:23	3	118	1.08	10.3	0.95	0.88	31	25.7	29.2	25.8	1.189	1.144	2	2
04:25	3.1	120	1.13	10.8	0.98	0.87	33	26.7	30.8	26.7	1.243	1.187	2	2
04:27	3.1	120	1.13	10.8	0.99	0.88	33	26.4	30.1	26.5	1.234	1.205	2	2
04:29	2.9	120	1.06	10.1	0.93	0.87	30	25.6	29.3	26	1.155	1.109	2	2
04:32	3.1	120	1.13	10.8	0.99	0.88	32	25.9	29.5	26.2	1.228	1.204	2	2
04:34	2.9	121	1.06	10.2	0.94	0.89	31	26.3	29.5	23.7	1.287	1.304	2	2
04:37	3.2	121	1.16	11.1	1.03	0.89	32	25.7	28.9	23.8	1.358	1.345	2	2
04:39	3.1	121	1.12	10.7	1	0.89	31	25.4	28.6	23.2	1.343	1.32	2	2
04:42	2.9	121	1.07	10.2	0.93	0.87	30	25.5	29.2	26.3	1.148	1.125	2	2
04:44	3	121	1.11	10.6	0.98	0.89	31	25.7	29.1	25	1.254	1.236	2	2
04:47	3.2	121	1.18	11.2	1.04	0.89	32	25	28.2	22.7	1.402	1.346	2	2
04:49	3.1	121	1.12	10.7	1.01	0.9	32	26.3	29.3	23	1.396	1.385	2	2
04:52	3.2	121	1.19	11.4	1.06	0.89	34	26.2	29.3	22.4	1.5	1.369	2	2
04:55	3.1	122	1.15	11	1.03	0.89	32	25.8	28.9	22.8	1.41	1.382	2	2
04:57	3.1	122	1.13	10.8	1.02	0.9	32	26.3	29.1	24.6	1.312	1.339	2	2
04:59	3.3	123	1.2	11.5	1.09	0.91	35	26.5	29.2	24.3	1.423	1.388	2	2
05:02	2.9	123	1.05	10	0.98	0.93	31	27.5	29.6	21.6	1.449	1.525	2	2
05:05	3.1	125	1.13	10.8	1.04	0.92	33	26.6	28.8	23.7	1.381	1.395	2	2
05:07	3.2	125	1.16	11.1	1.07	0.93	34	27	29.2	26	1.315	1.388	2	2
05:10	3	125	1.08	10.3	1	0.93	30	26	28	20.8	1.465	1.382	2	2
05:12	3.2	125	1.19	11.3	1.08	0.91	33	25.2	27.6	25.2	1.293	1.376	2	2
05:15	3.2	125	1.18	11.3	1.09	0.92	34	26.4	28.7	24.3	1.394	1.413	2	2
05:17	3.4	125	1.23	11.8	1.14	0.92	36	26.5	28.8	26	1.37	1.345	2	2
05:20	3.1	126	1.14	10.9	1.07	0.94	33	26.2	28	23.3	1.395	1.41	2	2
05:23	3.2	126	1.17	11.2	1.11	0.95	34	27.1	28.4	18.7	1.799	1.759	2	2
05:25	2.9	126	1.05	10	0.98	0.94	31	27	28.8	25	1.243	1.392	2	2
05:28	3.1	126	1.15	11	1.08	0.94	33	26.6	28.3	23.8	1.399	1.39	2	2
05:30	3.1	126	1.14	10.9	1.07	0.94	32	26.1	27.8	24.3	1.337	1.401	2	2
05:33	3.1	126	1.15	11	1.08	0.94	34	26.8	28.6	26.8	1.264	1.328	2	2
05:35	3	127	1.1	10.5	1.04	0.94	32	26.9	28.5	23.2	1.388	1.329	2	2
05:38	3.2	127	1.16	11.1	1.09	0.94	32	25.6	27.2	24.2	1.334	1.333	2	2
05:40	3.2	127	1.17	11.1	1.1	0.95	34	26.7	28.2	25	1.353	1.406	2	2
05:42	3.2	127	1.17	11.2	1.11	0.95	35	27.4	28.8	29.1	1.21	1.272	2	2
05:44	3.3	129	1.22	11.6	1.16	0.96	36	27.6	28.9	26.4	1.378	1.327	2	2
05:47	3	129	1.1	10.5	1.07	0.97	33	27.7	28.5	25.4	1.311	1.417	2	2
05:49	3	129	1.09	10.4	1.06	0.98	33	28.2	28.9	25	1.339	1.415	2	2
05:51	3.3	130	1.23	11.7	1.2	0.98	38	28.4	29.1	27.9	1.361	1.383	2	4
05:54	3	130	1.1	10.5	1.09	0.99	34	28.7	28.9	24.6	1.391	1.389	2	4
05:56	3.1	130	1.13	10.8	1.13	1	37	30	30.1	28.4	1.303	1.381	2	4
05:58	3.1	130	1.12	10.7	1.13	1	36	29.5	29.4	28	1.291	1.289	2	4
06:00	2.7	131	1.01	9.6	1.03	1.02	34	30.6	29.9	25.5	1.318	1.364	2	4
06:02	3	131	1.1	10.5	1.11	1.01	36	30.2	29.8	28	1.293	1.345	2	4
06:04	3.1	134	1.15	11	1.16	1.01	38	29.8	29.6	30.3	1.243	1.213	2	4
06:04	Recovery
06:06	2.4	134	0.88	8.4	0.88	1	32	32	31.9	34.5	0.924	0.97	2	4
06:08	3.3	134	1.19	11.4	1.24	1.03	42	32.2	31.2	30.2	1.387	1.374	2	4
06:10	3	136	1.09	10.4	1.14	1.05	38	32.3	30.8	27.5	1.388	1.473	1.2	0
06:13	2.8	136	1.01	9.7	1.07	1.06	35	32	30.3	25	1.411	1.397	1.2	0
06:15	2.9	137	1.05	10	1.12	1.07	37	32.3	30.3	27	1.363	1.447	1	0
06:17	2.8	137	1.04	9.9	1.09	1.04	35	30.3	29	27.3	1.268	1.235	1	0
06:19	2.7	137	1	9.5	1.05	1.05	34	30.8	29.3	30	1.133	1.293	1	0
06:22	2.3	137	0.83	7.9	0.87	1.05	27	29.8	28.4	22	1.238	1.206	1	0
06:24	3	137	1.1	10.5	1.15	1.04	34	28.6	27.5	25.6	1.342	1.317	0.9	0
06:27	2.9	137	1.07	10.3	1.11	1.03	33	28	27.1	23.9	1.367	1.328	0.9	0
06:29	2.5	137	0.93	8.9	0.96	1.03	28	27.5	26.7	22.8	1.228	1.311	0	0
06:32	3	137	1.1	10.5	1.11	1.01	32	26.6	26.3	24.9	1.286	1.308	0	0
06:34	2.8	134	1.02	9.8	1.04	1.02	31	27.3	26.7	25	1.225	1.274	0	0
06:37	2.7	134	0.98	9.4	1.02	1.03	30	27.8	26.9	24.2	1.239	1.32	0	0
06:39	2.6	133	0.96	9.2	1	1.04	29	27.7	26.6	21.2	1.366	1.345	0	0
06:42	2.9	133	1.05	10	1.09	1.04	31	26.7	25.8	22.5	1.36	1.369	0	0
06:45	2.4	130	0.88	8.4	0.91	1.03	26	27.1	26.3	19.4	1.338	1.365	0	0
06:49	2.6	130	0.95	9.1	0.97	1.02	26	25.4	25	18.4	1.422	1.272	0	0
06:51	3.2	129	1.17	11.2	1.18	1.01	33	25.6	25.5	24.5	1.338	1.329	0	0
06:54	2.9	129	1.07	10.3	1.1	1.02	31	26.5	25.9	23.2	1.34	1.34	0	0
06:57	2.9	127	1.06	10.1	1.07	1.02	29	25.4	25	19.9	1.461	1.35	0	0
06:59	2.7	127	0.99	9.4	1.02	1.03	30	27.5	26.6	23.4	1.268	1.397	0	0
07:02	2.6	123	0.94	9	0.98	1.04	29	27.9	26.9	23.7	1.22	1.264	0	0
07:05	2.7	121	0.99	9.5	1.03	1.04	29	26.9	25.9	19.9	1.449	1.289	0	0
07:07	2.1	121	0.76	7.3	0.84	1.09	29	33.4	30.6	28.8	0.996	1.441	0	0
07:08	1.7	121	0.63	6.1	0.62	0.98	21	27.2	27.9	34.5	0.611	0.351	0	0
07:12	2.8	120	1.04	9.9	1.1	1.05	31	28.3	26.8	17.7	1.774	1.671	0	0
07:14	2.7	118	1	9.5	1.03	1.03	30	27.5	26.6	25.3	1.196	1.181	0	0
07:17	2.7	118	0.99	9.5	1.03	1.04	30	27.9	26.9	24.9	1.221	1.199	0	0
07:19	2.6	118	0.95	9.1	1.01	1.06	30	28.8	27.3	24.3	1.239	1.268	0	0
07:22	2.4	117	0.88	8.4	0.91	1.04	27	27.3	26.4	23.2	1.149	1.053	0	0
07:24	3.2	117	1.15	11	1.22	1.05	35	27.9	26.5	24.6	1.42	1.41	0	0
07:27	3	117	1.08	10.3	1.16	1.07	33	27.7	26	22.8	1.427	1.423	0	0
07:29	2.7	116	1	9.5	1.07	1.07	32	29.6	27.6	23.6	1.36	1.44	0	0
07:32	2.9	116	1.07	10.2	1.13	1.06	33	28.2	26.7	24.3	1.351	1.277	0	0
07:35	2.6	114	0.96	9.2	1.02	1.06	30	28.6	26.9	20	1.484	1.382	0	0
07:37	2.5	114	0.92	8.7	0.99	1.08	30	30.4	28	22.5	1.349	1.363	0	0
07:40	2.4	110	0.89	8.5	0.98	1.1	29	30.5	27.7	21.4	1.38	1.348	0	0
07:43	2.4	110	0.9	8.6	1	1.12	30	31.3	28	21.5	1.416	1.392	0	0
07:46	2.2	108	0.8	7.6	0.9	1.13	27	30.7	27.3	18.5	1.433	1.318	0	0
07:49	2.3	105	0.84	8	0.94	1.13	28	31.1	27.6	18.9	1.486	1.388	0	0
07:52	2.2	105	0.8	7.6	0.89	1.12	27	31.2	27.7	20.7	1.308	1.319	0	0
07:55	2.2	103	0.8	7.7	0.91	1.13	28	32.1	28.4	22.3	1.265	1.232	0	0
07:58	2.1	103	0.78	7.4	0.9	1.15	26	31.2	27.1	18.2	1.444	1.307	0	0
08:01	2.1	101	0.77	7.4	0.88	1.14	27	32.3	28.3	19.9	1.367	1.316	0	0
08:04	2.1	100	0.77	7.4	0.89	1.15	27	32.5	28.3	20.3	1.348	1.253	0	0
08:08	1.8	100	0.66	6.3	0.77	1.16	24	33.4	28.7	16.9	1.417	1.244	0	0
08:24		96											0	0
08:39		96											0	0
08:55		95											0	0
09:11		96											0	0
09:27		100											0	0
09:42		96											0	0
09:58		97											0	0
10:14		93											0	0
10:29		91											0	0
10:45		91											0	0
11:01		93											0	0
11:17		84											0	0
11:32		85											0	0
11:48		86											0	0
12:04		85											0	0
12:20		96											0	0
12:35		84											0	0
12:51		82											0	0
13:07		88											0	0
	2.63933	113.68	0.967067	9.242	0.910867	0.944267	29.1	27.704	29.434	23.708	1.23427	1.21615	1.25562	0.792899
	0.284684	193.79	0.0377027	3.4344	0.0378724	0.00957228	24.1577	7.63864	4.57125	7.96249	0.0374314	0.0432373	0.893197	1.39138
	METS	HR	V'O2	V'CO2	RER	V'E	RR	VTex	VTin	Speed	Elev
	2.63933	113.68	0.967067	0.910867	0.944267	29.1	21.4698	1.0955	1.07942	1.25562	0.792899
	0.284684	193.79	0.0377027	0.0378724	0.00957228	24.1577	46.8456	0.186119	0.186811	0.893197	1.39138
	METS						HR						VO2						VO2/KG						VCO2						RER						VE						VE/VO2						VE/VCO2
	Rest		Test		Recovery		Rest		Test		Recovery		Rest		Test		Recovery		Rest		Test		Recovery		Rest		Test		Recovery		Rest		Test		Recovery		Rest		Test		Recovery		Rest		Test		Recovery		Rest
	MEDIA	VAR	MEDIA	VAR	MEDIA	VAR	MEDIA	VAR	MEDIA	VAR	MEDIA	VAR	MEDIA	VAR	MEDIA	VAR	MEDIA	VAR	MEDIA	VAR	MEDIA	VAR	MEDIA	VAR	MEDIA	VAR	MEDIA	VAR	MEDIA	VAR	MEDIA	VAR	MEDIA	VAR	MEDIA	VAR	MEDIA	VAR	MEDIA	VAR	MEDIA	VAR	MEDIA	VAR	MEDIA	VAR	MEDIA	VAR	MEDIA
	1.13103	0.067931	2.65631	0.356602	2.60213	0.129343	93.9286	5.25397	113.786	117.601	113.515	316.284	0.417241	0.00919926	0.973495	0.0473641	0.952979	0.016804	3.98966	0.836675	9.30388	4.31489	9.10638	1.52931	0.395172	0.00811872	0.866408	0.0424683	1.0083	0.0143796	0.946552	0.00170197	0.891553	0.00415443	1.05979	0.00193691	14.7931	7.02709	28.5437	27.9368	30.3191	14.0916	31.0345	14.1609	27.0126	7.25366	29.2191	5.24245	32.7276
	METS						HR						VO2						VCO2						RER						VE						Vtex						Vtin						LABEL
	Rest		Test		Recovery		Rest		Test		Recovery		Rest		Test		Recovery		Rest		Test		Recovery		Rest		Test		Recovery		Rest		Test		Recovery		Rest		Test		Recovery		Rest		Test		Recovery
	MEDIA	VAR	MEDIA	VAR	MEDIA	VAR	MEDIA	VAR	MEDIA	VAR	MEDIA	VAR	MEDIA	VAR	MEDIA	VAR	MEDIA	VAR	MEDIA	VAR	MEDIA	VAR	MEDIA	VAR	MEDIA	VAR	MEDIA	VAR	MEDIA	VAR	MEDIA	VAR	MEDIA	VAR	MEDIA	VAR	MEDIA	VAR	MEDIA	VAR	MEDIA	VAR	MEDIA	VAR	MEDIA	VAR	MEDIA	VAR	BIN
	1.13103	0.067931	2.65631	0.356602	2.60213	0.129343	93.9286	5.25397	113.786	117.601	113.515	316.284	0.417241	0.00919926	0.973495	0.0473641	0.952979	0.016804	0.395172	0.00811872	0.866408	0.0424683	1.0083	0.0143796	0.946552	0.00170197	0.891553	0.00415443	1.05979	0.00193691	14.7931	7.02709	28.5437	27.9368	30.3191	14.0916	0.874724	0.0916904	1.19746	0.0373502	1.31494	0.028742	0.871107	0.0738548	1.17741	0.0441051	1.30104	0.0315287	0
[truncated: 37 more columns]
