# Supplementary material for: On the development of diagnostic support algorithms based on CPET biosignals data via machine learning and wavelets
Source: PeerJ journal article supplement (doi:10.7717/peerj-cs.2474), 2025-01-30
Supplement: raw_data.zip [file Subject02_BxB.xlsx]

## Sheet: Demographics
Gender:	Male
Age:	79
Height (cm):	176
Weight (kg):	85.4
BMI:	28
Condition:	HFrEf

## Sheet: Subject02_BxB
Time	METS	HR	V'O2	V'O2/kg	V'CO2	RER	V'E	VE/VO2	VE/VCO2	RR	VTex	VTin	Speed	Elev
min		1/min	L/min	(mL/min)/kg	L/min		L/min			1/min	L	L	mph	%
00:00	Rest
02:11						0.72		34	47.1	0.5	0.332		0	0
02:14	2.2	75	0.66	7.8	0.51	0.77	21	28.1	36.3	19.5	1.075	2.11	0	0
02:17	2.6	75	0.76	8.9	0.64	0.83	29	34.8	41.7	22.1	1.323	1.453	0	0
02:20	1.9	75	0.58	6.8	0.52	0.9	24	38.3	42.4	19.5	1.256	1.294	0	0
02:22	1.9	75	0.58	6.8	0.55	0.94	29	45.2	48.1	23.4	1.242	1.392	0	0
02:26	1.6	75	0.49	5.7	0.5	1.02	26	48.4	47.4	18.3	1.407	1.598	0	0
02:29	0.7	76	0.2	2.3	0.2	1.01	13	56.6	56.2	15.7	0.829	1.025	0	0
02:33	2.3	76	0.67	7.9	0.69	1.02	32	43.5	42.6	18.3	1.718	1.742	0	0
02:36	1.6	76	0.47	5.5	0.51	1.1	26	50.8	46	17.9	1.441	1.409	0	0
02:39	0.9	76	0.27	3.2	0.3	1.08	18	56.2	51.9	22.1	0.815	0.962	0	0
02:42	1.1	77	0.33	3.8	0.36	1.09	19	51.7	47.4	19.8	0.974	0.992	0	0
02:45	0.9	75	0.27	3.2	0.29	1.06	16	49.2	46.5	18.2	0.853	0.965	0	0
02:47	0.9	75	0.27	3.2	0.27	1.01	16	48.9	48.3	26	0.628	0.78	0	0
02:47	Test
02:52	1.5	75	0.44	5.2	0.46	1.04	20	41.3	39.7	12.3	1.604	1.209	0	0
02:54	1.3	75	0.39	4.5	0.37	0.97	18	36.9	38	28.2	0.625	0.73	0.4	0
02:57	1.2	75	0.36	4.3	0.35	0.96	20	45.2	46.9	28	0.707	0.989	0.5	0
02:59	1.5	75	0.43	5.1	0.41	0.95	20	38.4	40.6	26.1	0.76	0.661	0.5	0
03:01	1	74	0.29	3.4	0.26	0.88	15	38.9	44.3	30.8	0.488	0.501	0.8	0
03:03	1.4	74	0.41	4.8	0.35	0.85	18	34.4	40.3	29.1	0.602	0.592	0.8	0
03:05	2.1	76	0.62	7.3	0.54	0.86	23	32.5	37.6	23.9	0.968	1.068	1.3	0
03:08	1.6	76	0.49	5.7	0.41	0.84	20	35.1	42	26.2	0.776	0.81	1.3	0
03:10	1.7	84	0.5	5.9	0.41	0.81	19	31.8	39.3	25.3	0.75	0.762	1.7	0
03:12	2	84	0.6	7.1	0.49	0.82	22	31.6	38.8	25.4	0.87	0.903	1.7	0
03:15	2.5	90	0.74	8.7	0.59	0.8	26	30.7	38.3	27	0.962	0.971	2	0
03:17	2.5	90	0.74	8.7	0.62	0.83	26	31.7	38.2	20.9	1.246	1.309	2	0
03:20	2.3	87	0.68	7.9	0.57	0.84	25	32.5	38.9	21.4	1.151	1.292	2	0
03:25	2.7	78	0.81	9.5	0.74	0.91	31	36.5	40	13.9	2.25	2.633	2	0
03:28	2.5	78	0.74	8.7	0.7	0.94	33	41.3	43.9	20.5	1.61	1.66	2	0
03:30	2.2	82	0.66	7.7	0.6	0.91	31	41.3	45.6	30.5	1.013	1.031	2	0
03:32	2.2	82	0.66	7.7	0.61	0.93	27	37.5	40.4	20.1	1.346	1.471	2	0
03:34	2.3	85	0.69	8.1	0.6	0.87	29	36.1	41.6	34.5	0.848	0.886	2	0
03:36	1.8	85	0.52	6.1	0.44	0.84	23	35.8	42.4	33.7	0.676	0.754	2	0
03:38	2.4	85	0.71	8.3	0.6	0.84	28	34.7	41.2	31.1	0.915	0.972	2	0
03:40	2	86	0.59	6.9	0.48	0.81	24	34.7	42.8	32.8	0.741	0.787	2	0
03:42	1.9	86	0.57	6.7	0.45	0.79	22	32	40.7	32.1	0.689	0.712	2	0
03:44	2.4	86	0.72	8.5	0.57	0.79	26	31.3	39.6	26.3	0.981	1.143	2	0
03:46	2.9	88	0.88	10.3	0.69	0.79	29	29.9	38	26.4	1.112	1.162	2	0
03:49	2.6	88	0.79	9.2	0.63	0.8	27	31.2	38.8	25	1.099	1.306	2	0
03:51	2.9	90	0.88	10.3	0.7	0.79	31	30.8	38.8	28.8	1.059	1.148	2	0
03:53	2.4	90	0.7	8.2	0.56	0.8	27	34.4	42.9	27.9	0.985	1.146	2	0
03:56	3.4	90	1.01	11.8	0.86	0.85	37	33.7	39.5	20.1	1.813	1.896	2	0
03:59	2.8	90	0.82	9.6	0.73	0.88	32	36.3	41.1	18.6	1.726	1.863	2	0
04:01	2.7	90	0.81	9.5	0.7	0.86	32	35.8	41.5	24.8	1.295	1.364	2	0
04:04	2.7	91	0.82	9.6	0.72	0.88	30	33.8	38.4	19.9	1.506	1.649	2	0
04:07	2.7	91	0.8	9.3	0.69	0.86	32	35.7	41.3	25.8	1.223	1.413	2	0
04:09	2.6	91	0.78	9.1	0.66	0.85	31	34.9	41.3	28.7	1.063	1.128	2	0
04:11	2.8	91	0.85	10	0.73	0.86	32	34.4	40.2	24	1.34	1.421	2	0
04:14	2.8	91	0.84	9.8	0.72	0.87	32	35.6	41.1	22.6	1.433	1.617	2	0
04:16	2.5	92	0.76	8.9	0.63	0.84	30	35.1	41.9	30.5	0.992	1.093	2	0
04:18	2.6	92	0.78	9.2	0.64	0.82	30	33.8	41.3	33.1	0.917	1.014	2	0
04:20	2.9	92	0.88	10.3	0.72	0.82	33	33.4	40.6	30	1.099	1.204	2	0
04:22	2.7	92	0.82	9.6	0.67	0.82	31	33.6	41.1	28.6	1.082	1.214	2	0
04:24	3.1	92	0.94	11	0.76	0.8	34	31.7	39.4	30.8	1.089	1.106	2	0
04:26	2.8	92	0.84	9.9	0.69	0.82	33	34.2	41.8	30.3	1.073	1.273	2	0
04:29	2.5	92	0.74	8.6	0.78	1.05	23	28	26.6	19.1	1.201	1.381	2	0
04:31	3.1	93	0.93	10.9	0.75	0.8	33	31.4	39	28.8	1.134	1.21	2	0
04:33	3.2	93	0.96	11.2	0.77	0.8	33	31.2	38.9	28.4	1.172	1.258	2	0
04:35	3.1	92	0.92	10.8	0.74	0.8	34	33.6	41.7	28.2	1.22	1.355	2	0
04:37	3.2	92	0.96	11.3	0.77	0.8	35	32.1	40.3	31.9	1.09	1.125	2	0
04:39	2.9	92	0.87	10.2	0.7	0.81	32	32.7	40.6	30.2	1.059	1.206	2	0
04:42	3.2	93	0.97	11.4	0.83	0.85	36	34.4	40.4	20.2	1.772	1.98	2	0
04:44	3.1	92	0.92	10.7	0.76	0.83	36	35	42.3	28.8	1.233	1.277	2	0
04:46	3.2	92	0.95	11.1	0.79	0.83	36	34.5	41.5	26.8	1.342	1.364	2	0
04:48	3.2	92	0.95	11.2	0.8	0.83	37	35.1	42.1	31.9	1.169	1.309	2	0
04:51	3.3	92	0.97	11.4	0.83	0.86	37	35	40.8	23.9	1.545	1.651	2	0
04:53	2.2	92	0.67	7.8	0.56	0.83	25	33.1	39.7	28.3	0.9	1.086	2	0
04:55	3.3	92	1	11.7	0.83	0.83	38	34.1	41	32.3	1.174	1.249	2	1.5
04:57	3.3	92	0.98	11.5	0.81	0.83	37	34.1	41	30.2	1.225	1.343	2	1.5
04:59	3.1	92	0.94	11	0.78	0.83	36	34.4	41.5	32.1	1.129	1.234	2	1.5
05:01	3.2	93	0.95	11.1	0.79	0.84	36	33.9	40.5	28.2	1.262	1.433	2	2
05:03	3	93	0.9	10.5	0.76	0.84	34	34	40.3	30.3	1.126	1.235	2	2
05:05	3.1	93	0.91	10.7	0.76	0.84	35	34.3	41	32.4	1.086	1.244	2	2
05:07	3	93	0.9	10.6	0.75	0.84	34	33.8	40.5	28	1.208	1.323	2	2
05:09	3.3	93	0.98	11.5	0.83	0.84	38	34.8	41.3	28.4	1.323	1.423	2	2
05:12	3.1	92	0.93	10.9	0.83	0.89	36	36.7	41.1	19.2	1.886	2.164	2	2
05:15	3.3	93	0.97	11.4	0.88	0.9	38	36.6	40.6	20.6	1.85	1.953	2	2
05:18	3	93	0.9	10.5	0.82	0.92	35	36.9	40.2	20	1.771	1.888	2	2
05:20	3.2	93	0.95	11.1	0.82	0.86	39	36.5	42.2	31.6	1.219	1.257	2	2
05:22	2.6	93	0.78	9.2	0.67	0.85	32	36.5	42.7	29.9	1.079	1.214	2	2
05:24	3	93	0.89	10.4	0.74	0.84	33	33.6	40	29.9	1.118	1.145	2	2
05:26	2.8	93	0.84	9.9	0.7	0.84	32	34.3	41.1	27.5	1.171	1.294	2	2
05:29	3.1	93	0.93	10.9	0.8	0.85	34	34	39.8	21.4	1.604	1.722	2	2
05:31	3	93	0.89	10.4	0.74	0.83	33	33.3	40.3	28.4	1.162	1.258	2	2
05:33	3.1	93	0.94	11	0.77	0.82	32	30.5	37.4	24.4	1.296	1.345	2	2
05:36	4	94	1.19	14	1.03	0.86	45	35.2	40.8	21.7	2.052	2.287	2	2
05:38	3.2	94	0.94	11.1	0.8	0.85	37	35.7	42	29.9	1.249	1.328	2	2
05:41	3.4	94	1	11.7	0.86	0.86	36	33.4	38.8	24.9	1.465	1.459	2	2
05:43	3.1	94	0.93	10.9	0.79	0.85	36	35	41	27.6	1.294	1.471	2	2
05:45	3.4	94	1.01	11.8	0.86	0.85	38	34.2	40.1	26.5	1.422	1.464	2	2
05:47	3	94	0.91	10.6	0.77	0.84	35	35.2	41.7	27.5	1.28	1.406	2	2
05:49	3.4	95	1.02	12	0.86	0.84	38	34	40.3	26.8	1.421	1.48	2	2
05:52	3.1	95	0.93	10.9	0.79	0.85	36	35.5	42	27.5	1.319	1.427	2	2
05:54	3.2	95	0.95	11.2	0.8	0.84	36	34.1	40.7	28.2	1.273	1.348	2	2
05:56	3.4	94	1.02	12	0.86	0.84	37	33.6	39.8	24.5	1.522	1.556	2	2
05:59	3.3	94	1	11.7	0.85	0.85	37	34.1	40.1	25.1	1.474	1.638	2	2
06:01	3.1	94	0.91	10.7	0.76	0.83	34	32.7	39.6	31.1	1.081	1.128	2	2
06:03	3.2	94	0.94	11	0.76	0.81	35	32.8	40.4	30	1.151	1.213	2	2
06:04	3.2	95	0.96	11.2	0.76	0.8	34	31.7	39.7	30.9	1.099	1.246	2	2
06:06	3.1	95	0.93	11	0.75	0.8	32	30.5	38	29.7	1.081	1.128	2	2
06:08	3.7	95	1.1	12.9	0.88	0.8	38	30.8	38.6	30.9	1.215	1.274	2	2
06:11	3.7	95	1.1	12.9	0.92	0.84	41	34.3	41	23.7	1.71	1.946	2	2
06:13	3.6	95	1.08	12.6	0.89	0.83	41	34.4	41.4	31.7	1.286	1.293	2	2
06:15	3.3	95	0.97	11.4	0.81	0.83	38	35.3	42.5	30.3	1.253	1.421	2	2
06:18	3.3	95	0.99	11.7	0.86	0.87	37	34.3	39.6	22.1	1.66	1.853	2	2
06:20	3.6	96	1.06	12.5	0.91	0.85	40	34.1	40	27.6	1.431	1.469	2	2
06:22	3.1	96	0.92	10.8	0.78	0.85	35	34.5	40.7	25.6	1.362	1.539	2	2
06:24	3.5	96	1.06	12.4	0.89	0.84	40	34.5	41.1	30.5	1.318	1.356	2	2
06:27	3.2	95	0.96	11.2	0.84	0.87	36	34.9	40	20.9	1.716	1.952	2	2
06:29	3.3	94	1	11.7	0.85	0.85	35	32.5	38.3	25.4	1.394	1.44	2	2
06:31	3.2	94	0.96	11.2	0.81	0.85	37	34.8	41	28.3	1.299	1.492	2	2
06:33	3.2	94	0.97	11.3	0.81	0.84	36	33.4	40	29.7	1.206	1.269	2	2
06:36	3.1	93	0.94	11	0.78	0.83	35	33.9	40.9	27.5	1.279	1.415	2	2
06:38	3.6	93	1.07	12.5	0.89	0.83	38	32.6	39.1	26.7	1.426	1.495	2	2
06:40	3.5	94	1.04	12.2	0.87	0.83	39	33.8	40.5	28.3	1.362	1.468	2	2
06:43	2.8	94	0.83	9.7	0.69	0.84	29	31.5	37.6	22.5	1.277	1.535	2	2
06:45	3.7	95	1.1	12.9	0.92	0.84	39	32.4	38.7	26.5	1.461	1.586	2	2
06:47	3.6	95	1.08	12.6	0.89	0.83	39	33	39.9	28.7	1.357	1.447	2	2
06:49	3.4	95	1.02	12	0.85	0.83	37	32.9	39.7	28.8	1.286	1.346	2	2
06:51	3.3	96	0.99	11.6	0.82	0.84	37	33.6	40.2	29.4	1.247	1.422	2	2
06:53	3.5	96	1.04	12.2	0.85	0.82	38	32.4	39.6	32.3	1.166	1.254	2	2
06:55	3.6	95	1.08	12.7	0.9	0.83	39	33.2	40.1	29.6	1.336	1.435	2	4
06:57	3.7	95	1.09	12.8	0.91	0.83	39	32.6	39.3	30.6	1.283	1.315	2	4
06:59	3.4	95	1.01	11.8	0.85	0.84	37	34	40.5	26.2	1.427	1.598	2	4
07:03	3.3	95	0.99	11.5	0.88	0.89	36	34.2	38.4	15.4	2.304	2.517	2	4
07:05	3.5	95	1.06	12.4	0.93	0.88	42	37	41.9	26.2	1.613	1.845	2	4
07:08	3.3	95	0.98	11.5	0.85	0.87	39	36.5	41.9	27.9	1.401	1.533	2	4
07:10	3.2	95	0.95	11.1	0.82	0.86	37	35.4	41.1	29.1	1.276	1.463	2	4
07:12	3.4	95	1.01	11.8	0.86	0.86	38	34.6	40.3	28	1.363	1.492	2	4
07:14	3.4	95	1.01	11.8	0.85	0.84	37	33.7	40	27.9	1.335	1.398	2	4
07:16	2.3	96	0.68	7.9	0.55	0.81	26	34.4	42.3	24.7	1.065	1.144	2	4
07:18	4	96	1.21	14.1	0.97	0.81	41	31	38.4	28.8	1.414	1.448	2	4
07:20	3.6	95	1.06	12.4	0.85	0.8	38	32.1	40	31.2	1.212	1.294	2	4
07:22	3.8	95	1.14	13.3	0.91	0.81	38	30.5	37.9	28	1.355	1.45	2	4
07:24	3.4	95	1.02	12	0.83	0.82	38	33.5	41.1	30	1.262	1.48	2	4
07:26	3.6	95	1.07	12.5	0.87	0.82	38	32.3	39.6	30.9	1.24	1.303	2	4
07:28	3.7	95	1.11	13.1	0.91	0.81	40	32.4	39.8	31.7	1.259	1.323	2	4
07:30	3.7	96	1.11	13	0.92	0.82	40	32.9	39.9	31.7	1.273	1.387	2	4
07:32	3.5	96	1.06	12.4	0.87	0.83	39	33.3	40.3	31.3	1.244	1.365	2	4
07:34	3.7	95	1.1	12.9	0.92	0.84	39	32.1	38.3	27.9	1.386	1.495	2	4
07:38	3.1	95	0.93	10.9	0.82	0.88	36	36.5	41.5	18.4	1.972	2.187	2	4
07:40	4.3	95	1.29	15.1	1.13	0.88	47	34.6	39.3	22.3	2.116	2.176	2	4
07:43	3.5	95	1.05	12.3	0.95	0.91	42	37.5	41.4	21.2	1.974	2.187	2	4
07:46	3.7	95	1.09	12.8	0.98	0.9	43	36.8	41	23.1	1.862	1.989	2	4
07:48	3.1	95	0.92	10.8	0.84	0.91	37	37.5	41.2	21.1	1.766	1.971	2	4
07:51	3.4	96	1.03	12	0.92	0.89	39	35.3	39.4	21.7	1.793	1.918	2	4
07:53	3.6	96	1.07	12.5	0.93	0.87	41	35.5	40.9	27	1.526	1.637	2	4
07:56	3.4	95	1	11.8	0.87	0.86	38	34.9	40.4	29	1.327	1.478	2	4
07:58	3.5	95	1.05	12.3	0.93	0.88	39	34.7	39.4	21.2	1.842	1.98	2	4
08:00	3.7	95	1.1	12.9	0.93	0.85	41	34.1	40.2	29.6	1.389	1.478	2	4
08:03	3.6	95	1.07	12.5	0.91	0.85	39	33.7	39.5	26.8	1.463	1.568	2	4
08:05	3.4	95	1	11.8	0.85	0.85	38	34.6	40.7	28	1.358	1.549	2	4
08:07	3.4	95	1	11.7	0.86	0.86	38	35.1	41	25.4	1.504	1.705	2	4
08:09	3.6	96	1.07	12.5	0.9	0.84	39	33.4	39.7	27.8	1.405	1.429	2	4
08:11	3	96	0.9	10.6	0.73	0.81	34	33.3	41	31.6	1.073	1.221	2	4
08:13	3.8	96	1.14	13.4	0.94	0.83	41	32.2	39	33.1	1.232	1.311	2	4
08:15	3.6	95	1.09	12.7	0.88	0.81	40	32.8	40.6	33.3	1.189	1.242	2	4
08:17	3.3	95	1	11.7	0.81	0.81	37	32.6	40.1	33.1	1.101	1.26	2	4
08:19	3.7	95	1.11	13	0.9	0.81	40	32.3	39.7	31.7	1.246	1.368	2	4
08:21	3.9	95	1.17	13.7	1	0.86	45	36	41.9	22.2	2.014	2.245	2	4
08:24	3.7	95	1.12	13.1	0.99	0.88	45	37.8	42.8	24.4	1.852	2.09	2	4
08:27	3.7	96	1.09	12.8	0.98	0.9	42	36.3	40.5	20.4	2.064	2.05	2	4
08:29	3.3	95	0.98	11.5	0.89	0.91	40	38.2	41.9	21.2	1.885	2.149	2	4
08:32	3.2	95	0.96	11.2	0.87	0.91	39	37.8	41.5	21.1	1.834	2.035	2	4
08:35	3.2	95	0.97	11.3	0.86	0.89	37	35.1	39.4	20.8	1.759	1.876	2	4
08:37	3.7	95	1.1	12.9	0.94	0.86	41	34.3	39.9	28.3	1.451	1.557	2	4
08:39	3.7	96	1.11	12.9	0.95	0.86	42	35	40.6	27.3	1.539	1.628	2	4
08:41	3.7	96	1.12	13.1	0.95	0.85	43	34.6	40.8	32.6	1.304	1.414	2	4
08:43	3.8	96	1.13	13.3	0.98	0.86	44	35.4	41.1	28.8	1.513	1.637	2	4
08:46	3.9	95	1.17	13.8	1.03	0.87	45	35.4	40.5	28.4	1.58	1.678	2	4
08:47	3.6	95	1.08	12.7	0.93	0.86	41	34.5	40.1	32.3	1.277	1.353	2	4
08:49	3.8	95	1.13	13.3	0.98	0.87	44	35.4	40.9	30.9	1.417	1.549	2	4
08:51	3.3	95	0.99	11.5	0.84	0.85	39	35.5	41.6	31.9	1.216	1.35	2	4
08:53	3.4	95	1.02	11.9	0.87	0.86	39	34.2	40	30.9	1.248	1.365	2	4
08:55	3.6	95	1.09	12.7	0.92	0.85	40	33.5	39.6	31.7	1.268	1.36	2	6
08:57	3.7	95	1.09	12.8	0.93	0.85	42	35	41.1	31.7	1.326	1.478	2	6
08:59	3.8	95	1.15	13.4	0.98	0.85	44	35.6	41.7	30.3	1.468	1.548	2	6
09:01	3.7	95	1.11	13	0.98	0.88	44	37	41.9	25.8	1.709	1.907	2	6
09:03	4	95	1.21	14.1	1.05	0.87	48	36.6	42.1	31.3	1.533	1.572	2	6
09:05	3.7	95	1.09	12.8	0.95	0.87	43	36.2	41.4	30.2	1.429	1.595	2	6
09:08	3.7	95	1.12	13.1	1.01	0.9	44	36.7	40.8	25.2	1.751	1.95	2	6
09:10	3.3	95	1	11.7	0.89	0.89	41	37.5	42.1	28.8	1.421	1.614	2	6
09:12	3.6	95	1.09	12.7	0.98	0.9	43	36.6	40.6	25.9	1.655	1.765	2	6
09:14	3.7	95	1.12	13.1	1	0.89	45	37	41.6	28.6	1.569	1.625	2	6
09:16	3.5	94	1.05	12.3	0.94	0.9	42	37.3	41.6	27.1	1.558	1.722	2	6
09:18	3.6	94	1.07	12.5	0.96	0.9	43	37.3	41.3	29.3	1.476	1.618	2	6
09:20	3.6	94	1.07	12.5	0.94	0.88	41	34.9	39.6	29.3	1.39	1.45	2	6
09:23	3.6	94	1.07	12.5	0.96	0.9	41	35.8	39.8	22.3	1.838	1.979	2	6
09:25	3.7	94	1.11	13	0.98	0.88	44	36.4	41.2	31.2	1.414	1.579	2	6
09:27	3.6	94	1.08	12.7	0.95	0.88	43	36.4	41.5	31.3	1.378	1.54	2	6
09:29	4.1	94	1.22	14.3	1.08	0.88	47	35.8	40.7	28.7	1.644	1.738	2	6
09:31	3.7	95	1.12	13.1	0.99	0.89	44	36.2	40.7	31.9	1.383	1.49	2	6
09:33	3.8	95	1.13	13.2	0.99	0.88	45	36	41.1	32.4	1.375	1.488	2	6
09:34	3.8	97	1.13	13.2	0.98	0.87	44	35.3	40.4	33	1.325	1.441	2	6
09:37	4	97	1.21	14.1	1.07	0.89	46	35.1	39.6	26.4	1.723	1.817	2	6
09:39	3.6	97	1.08	12.7	0.96	0.88	42	36	40.7	28.7	1.475	1.643	2	6
09:41	3.8	96	1.15	13.5	1.01	0.88	45	36.2	41.3	31.4	1.445	1.571	2	6
09:43	3.7	96	1.12	13.1	1.02	0.92	44	37.1	40.6	23	1.928	2.118	2	6
09:46	3.5	95	1.03	12.1	0.93	0.9	40	35.9	39.8	21.7	1.834	1.882	2	6
09:49	3.3	95	0.97	11.4	0.88	0.9	38	36.2	40	21.3	1.779	2.138	2	6
09:51	4	95	1.18	13.9	1.04	0.88	44	34.2	39	26.4	1.651	1.653	2	6
09:53	3.9	95	1.18	13.8	1.04	0.88	45	35.4	40.2	29.1	1.55	1.697	2	6
09:55	3.9	95	1.16	13.6	1.02	0.87	44	34.7	39.7	29.7	1.478	1.588	2	6
09:58	3.8	95	1.14	13.4	1.02	0.89	42	34.5	38.8	24.6	1.722	1.907	2	6
10:00	3.9	96	1.17	13.7	1.02	0.88	44	34.9	39.9	29.4	1.506	1.598	2	6
10:02	3.8	96	1.13	13.2	1.01	0.89	44	35.8	40.2	27.4	1.597	1.753	2	6
10:04	3.8	96	1.13	13.3	1	0.88	43	35.1	39.9	30	1.447	1.56	2	6
10:06	3.8	95	1.15	13.5	1.02	0.89	45	36.5	41	26.5	1.7	1.875	2	6
10:08	3.9	95	1.17	13.7	1.04	0.89	46	36	40.4	30.3	1.509	1.575	2	6
10:10	3.8	95	1.12	13.1	1	0.89	44	35.9	40.5	28.3	1.543	1.644	2	6
10:12	3.9	95	1.15	13.5	1.03	0.89	46	36.5	40.8	30.3	1.509	1.739	2	6
10:14	4	94	1.2	14.1	1.07	0.89	47	36.1	40.7	31.3	1.509	1.574	2	6
10:16	3.9	94	1.16	13.6	1.03	0.89	46	36.3	40.8	31.2	1.465	1.593	2	6
10:18	4	94	1.21	14.1	1.06	0.88	47	35.7	40.6	33	1.424	1.502	2	6
10:20	3.8	94	1.14	13.4	1.01	0.88	46	36.5	41.4	32.6	1.4	1.551	2	6
10:22	3.6	94	1.08	12.7	0.96	0.89	43	36.3	40.8	30.9	1.387	1.542	2	6
10:24	3.9	94	1.17	13.7	1.04	0.89	46	36.3	41	31.1	1.488	1.577	2	6
10:26	3.9	95	1.16	13.6	1.05	0.9	45	36.2	40.2	26.8	1.689	1.871	2	6
10:28	3.8	95	1.14	13.4	1.02	0.89	46	37.3	41.7	30.6	1.509	1.636	2	6
10:30	3.8	97	1.13	13.2	1.01	0.9	43	35.6	39.6	24.5	1.763	1.906	2	6
10:32	4.1	97	1.23	14.4	1.1	0.89	49	37.4	41.8	28.4	1.733	1.788	2	6
10:34	3.8	97	1.13	13.2	1.01	0.9	46	37.7	42.1	30.8	1.499	1.625	2	6
10:36	4.1	97	1.22	14.3	1.09	0.89	47	35.5	39.8	29.7	1.583	1.714	2	6
10:40	3.4	95	1.01	11.8	0.94	0.93	37	34.6	37.2	15.9	2.315	2.519	2	6
10:43	3.6	95	1.08	12.7	1	0.92	42	36.8	39.8	21.1	2.008	2.288	2	6
10:46	3.5	95	1.05	12.3	0.96	0.91	41	37	40.4	19.8	2.088	2.124	2	6
10:48	4.4	95	1.31	15.3	1.17	0.89	50	35.7	39.9	27	1.846	1.992	2	6
10:50	4.2	95	1.27	14.9	1.11	0.88	51	36.5	41.5	36.4	1.393	1.472	2	8
10:52	4	95	1.19	14	1.07	0.9	46	35.6	39.5	26	1.756	1.907	2	8
10:54	3.8	95	1.14	13.4	1.01	0.88	46	36.9	41.8	33.1	1.392	1.547	2	8
10:56	4.1	97	1.21	14.2	1.08	0.89	46	35.1	39.5	30.6	1.513	1.625	2	8
10:58	4.2	97	1.25	14.7	1.1	0.88	49	35.6	40.5	37	1.325	1.371	2	8
11:00	3.9	97	1.18	13.8	1.04	0.88	45	35.3	39.9	29.4	1.534	1.667	2	8
11:01	4	97	1.2	14.1	1.06	0.88	46	35.2	40	34.1	1.362	1.507	2	8
11:04	3.9	97	1.16	13.6	1.04	0.9	45	36.1	40.2	29	1.564	1.746	2	8
11:06	3.8	96	1.12	13.1	1	0.89	44	35.6	39.9	30.3	1.439	1.607	2	8
11:07	4.6	96	1.36	16	1.22	0.9	55	37.4	41.7	34.7	1.589	1.661	2	8
11:09	3.8	98	1.14	13.3	1.05	0.92	46	37.2	40.4	26.5	1.714	1.93	2	8
11:12	4	98	1.2	14.1	1.1	0.91	49	38.1	41.7	29.1	1.692	1.849	2	8
11:14	4.2	98	1.25	14.6	1.13	0.91	49	36.6	40.3	30.6	1.608	1.681	2	8
11:15	4.2	100	1.27	14.8	1.16	0.91	51	37.5	41.1	32.4	1.583	1.703	2	8
11:17	3.9	100	1.17	13.8	1.09	0.92	49	39	42.2	29.6	1.67	1.82	2	8
11:19	3.9	100	1.18	13.8	1.07	0.91	49	38.4	42.1	32.3	1.522	1.701	2	8
11:21	3.8	100	1.14	13.3	1.05	0.92	46	37.8	41	27.3	1.694	1.838	2	8
11:24	3.7	100	1.12	13.1	1.06	0.95	49	41	43.4	27.8	1.767	1.947	2	8
11:26	3.6	101	1.07	12.5	1.05	0.98	49	42.8	43.5	24.5	1.985	2.147	2	8
11:28	3.8	101	1.13	13.2	1.09	0.97	53	43.5	45	30.6	1.724	1.859	2	8
11:30	4	109	1.18	13.8	1.15	0.97	55	42.7	44	34.5	1.584	1.688	2	8
11:32	3.5	109	1.05	12.2	1.02	0.97	47	41.3	42.5	28.6	1.633	1.85	2	8
11:34	4.1	109	1.23	14.4	1.18	0.96	51	38.3	39.8	30.5	1.666	1.78	2	8
11:36	4.3	106	1.29	15.1	1.2	0.93	54	38.3	41.1	34.7	1.545	1.63	2	8
11:37	4.4	106	1.3	15.2	1.21	0.93	52	36.8	39.7	31.1	1.659	1.753	2	8
11:40	4.1	101	1.22	14.3	1.16	0.95	49	38.1	40	24.4	2.029	2.224	2	8
11:42	4.3	101	1.28	15	1.2	0.94	52	37.8	40.3	28.8	1.797	1.969	2	8
11:44	4.4	101	1.3	15.3	1.22	0.93	52	36.7	39.2	30.9	1.666	1.816	2	8
11:46	4.4	103	1.32	15.5	1.23	0.94	55	39	41.7	32.6	1.697	1.831	2	8
11:48	4.4	103	1.32	15.4	1.23	0.94	56	39.2	41.8	34.1	1.636	1.787	2	8
11:50	4	103	1.21	14.2	1.15	0.95	52	39.7	41.9	30.5	1.696	1.895	2	8
11:51	4	103	1.19	13.9	1.12	0.95	51	39.8	42	31.3	1.628	1.766	2	8
11:53	4.7	103	1.4	16.5	1.33	0.95	60	40.1	42.2	33.3	1.808	1.801	2	8
11:55	4.5	103	1.34	15.7	1.3	0.97	62	43.1	44.6	34.7	1.792	2.051	2	8
11:57	4	103	1.21	14.1	1.18	0.98	56	43	43.9	32.6	1.708	1.87	2	8
11:59	4.2	103	1.24	14.6	1.23	0.98	59	43.9	44.6	35.5	1.66	1.819	2	8
12:00	4.3	103	1.29	15.1	1.26	0.97	58	41.7	42.7	31.1	1.851	1.917	2	8
12:02	4.2	103	1.24	14.6	1.21	0.97	57	42.9	44	34.5	1.667	1.829	2	8
12:04	4.2	103	1.25	14.7	1.22	0.97	55	41	42	31.9	1.727	1.892	2	8
12:06	4.3	102	1.27	14.9	1.24	0.98	56	41.3	42.2	27.9	2.003	2.153	2	8
12:08	3.6	102	1.06	12.4	1.04	0.97	50	43.6	44.7	31.4	1.595	1.882	2	8
12:10	4.8	103	1.43	16.7	1.37	0.96	62	40.4	42.1	35.1	1.767	1.785	2	8
12:12	4.4	103	1.33	15.6	1.28	0.96	59	41.1	42.7	33.3	1.761	1.89	2	8
12:13	4.3	103	1.3	15.2	1.24	0.96	57	40.9	42.7	32.4	1.754	1.896	2	8
12:16	3.9	103	1.18	13.8	1.15	0.97	50	40.1	41.2	25.5	1.973	2.204	2	8
12:18	4.3	103	1.3	15.2	1.25	0.97	54	38.8	40.2	27	1.981	2.128	2	8
12:20	4.4	105	1.32	15.5	1.26	0.95	55	38.6	40.5	30.8	1.78	1.9	2	8
12:22	4.3	105	1.29	15.2	1.22	0.94	54	38.9	41.3	33	1.648	1.72	2	8
12:24	4.7	105	1.39	16.3	1.32	0.95	60	40.2	42.4	34.3	1.751	1.893	2	8
12:25	4	103	1.2	14.1	1.17	0.97	55	42.4	43.7	32.8	1.673	1.913	2	8
12:27	4.7	103	1.42	16.6	1.37	0.97	62	40.7	42.1	32.8	1.876	1.987	2	8
12:29	4.4	103	1.33	15.5	1.28	0.97	59	41.4	42.8	33.7	1.746	1.854	2	8
12:32	3.3	102	0.98	11.5	0.93	0.95	34	32.3	33.9	21.1	1.615	1.817	2	8
12:34	4.9	102	1.47	17.3	1.39	0.94	62	39.4	41.7	34.1	1.822	1.989	2	8
12:35	4.6	103	1.38	16.1	1.32	0.96	62	41.8	43.5	34.7	1.78	1.96	2	8
12:37	4.7	103	1.4	16.4	1.36	0.97	63	41.9	43.1	36.8	1.711	1.81	2	8
12:39	4.3	103	1.29	15.2	1.25	0.97	60	42.9	44.2	35.7	1.673	1.86	2	8
12:40	4.4	103	1.32	15.4	1.3	0.98	61	43.2	43.8	35.5	1.723	1.874	2	8
12:42	4.7	103	1.41	16.5	1.37	0.97	63	41.3	42.6	36.8	1.705	1.83	2	8
12:44	4.4	103	1.31	15.4	1.29	0.98	62	43.7	44.5	35.9	1.72	1.908	2	8
12:45	4.3	106	1.28	15	1.26	0.99	61	44.3	44.8	35.7	1.702	1.826	2	8
12:47	4.6	106	1.36	16	1.34	0.98	63	42.8	43.6	35.9	1.744	1.859	2	8
12:49	4.4	106	1.33	15.6	1.32	0.99	63	44.1	44.5	37.3	1.694	1.802	2	8
12:50	4.1	104	1.23	14.4	1.23	1	63	47.2	47.3	39.2	1.602	1.828	2	10
12:52	4.1	104	1.23	14.4	1.22	0.99	58	43.5	43.9	39.5	1.477	1.579	2	10
12:54	4.3	104	1.27	14.9	1.26	0.99	57	41.6	42	32.1	1.772	1.913	2	10
12:55	4.1	103	1.23	14.4	1.2	0.98	58	43.7	44.7	32.6	1.765	1.936	2	10
12:57	4.4	103	1.31	15.4	1.29	0.98	59	41.7	42.6	31.9	1.838	1.96	2	10
12:59	4.4	103	1.31	15.3	1.28	0.98	61	43.6	44.6	35.9	1.707	1.907	2	10
13:01	4.6	104	1.38	16.2	1.36	0.98	63	42.4	43.1	35.7	1.756	1.876	2	10
13:02	4.3	104	1.28	15	1.26	0.99	61	44.2	44.9	34.5	1.758	1.969	2	10
13:04	4.5	104	1.36	15.9	1.35	0.99	65	44.4	44.8	37	1.749	1.87	2	10
13:06	4.3	105	1.3	15.2	1.29	1	64	45.9	46.2	37.3	1.721	1.924	2	10
13:08	4.1	105	1.22	14.3	1.24	1.01	58	44.2	43.8	29	1.985	2.176	2	10
13:09	4.3	105	1.29	15.1	1.28	0.99	62	44.5	45	35.3	1.747	1.858	2	10
13:11	4.4	105	1.32	15.5	1.31	0.99	64	44.7	45.3	37.3	1.707	1.842	2	10
13:13	4.4	105	1.31	15.3	1.3	1	63	45.1	45.2	36.4	1.738	1.92	2	10
13:15	4.6	106	1.37	16	1.36	1	61	42.4	42.5	29.7	2.07	2.188	2	10
13:16	4.3	106	1.29	15.1	1.3	1	63	45.1	45.1	37.5	1.677	1.798	2	10
13:18	4.2	106	1.25	14.6	1.24	1	60	45.2	45.4	33.1	1.823	1.954	2	10
13:20	4.2	107	1.25	14.6	1.26	1.01	62	46.6	46	34.9	1.788	2.006	2	10
13:22	4.2	107	1.26	14.7	1.3	1.04	57	43.2	41.7	25.5	2.246	2.477	2	10
13:24	4.1	107	1.23	14.5	1.23	0.99	57	43.4	43.6	32.1	1.789	1.876	2	10
13:26	4.3	108	1.3	15.2	1.29	1	58	42.1	42.3	29.3	1.99	2.17	2	10
13:28	4.4	108	1.3	15.2	1.29	0.99	63	45.2	45.7	39.2	1.619	1.789	2	10
13:29	4.2	108	1.27	14.8	1.25	0.99	59	43.5	43.9	33.5	1.763	1.838	2	10
13:31	4.4	108	1.3	15.3	1.27	0.97	57	40.5	41.6	37.5	1.53	1.544	2	10
13:33	4.6	108	1.37	16.1	1.35	0.98	63	43	43.8	34.7	1.822	2.037	2	10
13:34	4.5	104	1.34	15.7	1.32	0.99	62	42.9	43.5	39	1.591	1.734	2	10
13:36	4.6	104	1.37	16.1	1.34	0.98	64	43.2	44.2	37	1.722	1.822	2	10
13:37	4.6	104	1.37	16	1.34	0.98	65	44	44.8	39.7	1.633	1.732	2	10
13:39	4.4	104	1.31	15.4	1.29	0.98	64	45.5	46.3	36.6	1.749	1.906	2	10
13:41	4.4	105	1.32	15.4	1.29	0.98	62	43.7	44.4	34.1	1.808	1.999	2	10
13:42	4.6	105	1.38	16.2	1.38	1	65	44.2	44.4	35.9	1.82	2.038	2	10
13:44	4.7	105	1.39	16.3	1.4	1	68	45.5	45.3	36.8	1.843	2	2	10
13:46	4.4	105	1.32	15.5	1.35	1.02	62	44.3	43.4	31.1	2.008	2.299	2	10
13:48	4.4	105	1.3	15.3	1.31	1.01	64	46.1	45.7	36.6	1.759	1.824	2	10
13:49	4.8	106	1.43	16.7	1.44	1.01	68	44.3	43.9	35.9	1.882	1.96	2	10
13:51	4.5	106	1.35	15.8	1.36	1.01	67	46.4	46.1	36.8	1.821	1.998	2	10
13:53	4.4	106	1.32	15.5	1.35	1.02	63	44.8	43.8	30.6	2.052	2.303	2	10
13:55	4.4	106	1.32	15.5	1.34	1.01	66	46.6	46	36.6	1.803	2.008	2	10
13:56	4.6	106	1.36	15.9	1.38	1.01	66	45.6	45	34.7	1.911	2.025	2	10
13:58	4.5	106	1.34	15.6	1.36	1.02	66	46	45.1	36.8	1.789	1.934	2	10
13:59	4.6	107	1.37	16	1.38	1.01	66	45.1	44.7	37.5	1.764	1.923	2	10
14:01	4.3	107	1.3	15.2	1.31	1.01	63	45.9	45.3	33.3	1.905	2.056	2	10
14:03	4.2	107	1.25	14.6	1.27	1.02	56	41.8	41	31.1	1.798	2.099	2	10
14:05	5.2	108	1.54	18	1.55	1.01	68	41.3	41	35.3	1.924	1.946	2	10
14:06	4.5	108	1.35	15.8	1.36	1.01	67	46.1	45.7	40	1.679	1.94	2	10
14:08	4.9	108	1.48	17.3	1.51	1.02	73	46	45	37.7	1.922	2.05	2	10
14:10	4.6	108	1.36	16	1.4	1.03	63	43.3	42.2	34.7	1.821	2.09	2	10
14:11	4.9	108	1.45	17	1.49	1.03	73	47.2	46	39.5	1.853	1.962	2	10
14:13	4.8	108	1.44	16.9	1.48	1.03	69	45	43.7	31.9	2.153	2.254	2	10
14:15	4.6	108	1.37	16	1.41	1.03	72	49.1	47.4	37.3	1.921	2.13	2	10
14:16	4.7	108	1.39	16.3	1.45	1.04	71	48	46.1	38.5	1.858	1.943	2	10
14:18	4.5	108	1.33	15.6	1.39	1.04	66	46.5	44.7	34.9	1.9	2.064	2	10
14:20	4.6	108	1.38	16.2	1.43	1.04	70	47.3	45.6	38	1.843	2.08	2	10
14:21	4.7	108	1.41	16.5	1.46	1.04	72	47.8	46.2	39.7	1.816	1.892	2	10
14:23	4.5	108	1.33	15.6	1.39	1.04	70	48.8	46.9	39.5	1.77	1.955	2	10
14:24	4.7	107	1.42	16.6	1.47	1.03	68	45.1	43.6	35.3	1.931	2.104	2	10
14:26	4.6	107	1.38	16.2	1.44	1.04	70	47.4	45.7	39.2	1.794	1.865	2	10
14:27	4.5	107	1.34	15.7	1.39	1.04	69	47.8	46.1	38.7	1.779	1.992	2	10
14:29	4.5	107	1.35	15.9	1.4	1.04	71	48.8	47.1	40	1.772	1.923	2	10
14:31	4.9	107	1.46	17.1	1.5	1.03	68	43.6	42.5	35.1	1.934	2.031	2	10
14:32	4.7	107	1.4	16.4	1.44	1.03	69	46.2	44.9	33.1	2.077	2.223	2	10
14:34	4.9	109	1.45	17	1.52	1.05	73	47.7	45.5	33.3	2.201	2.391	2	10
14:36	4.6	109	1.38	16.2	1.45	1.05	75	51.1	48.8	35.1	2.137	2.203	2	10
14:38	4.5	109	1.36	15.9	1.46	1.08	73	50.7	47	32.4	2.239	2.532	2	10
14:39	4.5	109	1.35	15.8	1.42	1.05	71	49.6	47	36.8	1.939	2.052	2	10
14:41	4.4	109	1.3	15.3	1.35	1.04	64	45.9	44.3	38.2	1.686	1.853	2	10
14:42	4.6	109	1.37	16	1.39	1.02	65	43.7	43.1	44.1	1.475	1.65	2	10
14:44	4.9	109	1.46	17.1	1.5	1.03	71	46	44.7	34.9	2.04	2.221	2	10
14:46	4.9	108	1.46	17.1	1.51	1.03	74	47.8	46.4	38.7	1.924	1.958	2	10
14:47	4.8	108	1.44	16.8	1.49	1.04	75	48.9	47.1	41.7	1.808	2.014	2	10
14:49	4.6	108	1.38	16.2	1.43	1.03	71	48.2	46.7	38.2	1.867	1.968	2	10
14:50	4.8	109	1.43	16.8	1.48	1.04	75	48.9	47.3	41.4	1.811	2.022	2	10
14:51	4.6	109	1.37	16	1.43	1.04	74	50.1	48	42.3	1.743	1.938	2	10
14:53	4.8	109	1.44	16.8	1.5	1.04	75	49	47	42.6	1.773	1.886	2	10
14:54	4.6	110	1.37	16	1.42	1.04	74	50.3	48.2	40.5	1.815	1.935	2	11
14:56	4.7	110	1.4	16.4	1.49	1.07	79	52.7	49.5	42.9	1.842	1.994	2	11
14:57	4.8	110	1.42	16.6	1.51	1.07	78	51.3	48.1	41.1	1.893	2.022	2	11
14:59	4.3	110	1.28	15	1.38	1.08	72	52.6	48.8	39.5	1.824	2.101	2	11
15:00	4.6	109	1.36	15.9	1.45	1.06	75	51.7	48.6	41.4	1.819	1.999	2	12
15:02	4.7	109	1.39	16.3	1.49	1.07	75	50.1	46.8	40.8	1.829	1.998	2	12
15:03	4.6	109	1.37	16.1	1.46	1.06	75	51.2	48.3	39.7	1.891	2.006	2	12
15:05	4.5	108	1.36	15.9	1.44	1.06	76	52.4	49.2	42.6	1.791	1.963	2	12
15:07	3.8	108	1.14	13.4	1.22	1.07	51	42.3	39.7	21.7	2.351	2.653	2	12
15:09	4.7	108	1.41	16.5	1.44	1.03	72	47.6	46.4	41.4	1.738	1.83	2	12
15:10	4.5	110	1.34	15.7	1.39	1.04	71	48.9	47.1	42.9	1.651	1.865	2	12
15:12	4.4	110	1.33	15.6	1.37	1.03	69	48	46.6	40.8	1.683	1.879	2	12
15:13	5	110	1.5	17.6	1.53	1.02	71	44.2	43.4	42	1.703	1.784	2	12
15:15	4.4	113	1.3	15.3	1.35	1.03	64	45.9	44.4	31.9	1.994	2.111	2	12
15:17	4.4	113	1.31	15.3	1.38	1.05	71	50.8	48.3	37.7	1.883	2.126	2	12
15:18	4.6	113	1.38	16.2	1.44	1.04	72	48.3	46.2	40	1.79	1.923	2	12
15:20	4.5	113	1.34	15.7	1.4	1.05	71	49.3	46.9	38.7	1.822	2.078	2	12
15:21	4.6	113	1.37	16	1.41	1.03	72	48.8	47.2	42.3	1.698	1.831	2	12
15:23	4.1	113	1.24	14.5	1.28	1.04	67	49.8	48.1	41.1	1.62	1.831	2	12
15:24	4.1	113	1.23	14.5	1.25	1.01	60	44.7	44.2	39	1.534	1.605	2	12
15:26	5.1	107	1.53	17.9	1.56	1.02	73	44.2	43.5	40.8	1.781	1.944	2	12
15:27	4.3	107	1.28	15	1.29	1.01	63	45.6	45.2	41.7	1.52	1.637	2	12
15:29	4.2	107	1.26	14.8	1.24	0.98	56	41.7	42.3	31.6	1.785	1.694	2	12
15:30	5	110	1.5	17.6	1.46	0.97	71	43.5	44.8	43.8	1.613	1.895	2	12
15:32	4.3	110	1.29	15.1	1.27	0.99	59	42.7	43.3	35.9	1.653	1.779	2	12
15:33	5.4	110	1.62	19	1.59	0.98	76	43.7	44.5	41.7	1.821	1.979	2	12
15:35	5.1	110	1.54	18	1.54	1	76	46.2	46.1	38.2	1.981	2.139	2	12
15:36	4.8	110	1.42	16.7	1.46	1.02	75	49	47.8	42.3	1.77	1.992	2	12
15:38	5	110	1.48	17.3	1.52	1.03	75	47.3	46.1	42.9	1.753	1.885	2	12
15:39	4.5	109	1.36	15.9	1.41	1.04	72	49.3	47.3	42.9	1.681	1.907	2	12
15:41	4.3	109	1.27	14.9	1.31	1.03	65	47.4	45.9	42	1.556	1.733	2	12
15:42	4.6	109	1.37	16.1	1.41	1.03	72	48.3	46.8	44.4	1.61	1.799	2	12
15:43	4.4	109	1.32	15.5	1.37	1.04	67	47.3	45.6	40	1.68	1.926	2	12
15:45	5.5	109	1.63	19.1	1.7	1.04	80	46.3	44.4	41.4	1.943	1.943	2	12
15:46	4.8	109	1.42	16.7	1.49	1.05	78	50.9	48.5	44.1	1.762	2.034	2	12
15:48	4.8	109	1.44	16.9	1.53	1.06	77	49.9	46.9	40.5	1.894	2.079	2	12
15:49	4.6	109	1.37	16.1	1.47	1.07	78	53	49.5	44.1	1.77	2.022	2	12
15:50	4.6	110	1.39	16.3	1.49	1.07	79	52.9	49.4	42.9	1.835	2.014	2	12
15:52	4.8	110	1.44	16.9	1.53	1.07	78	51.1	48	40	1.959	2.081	2	12
15:54	4.5	110	1.36	15.9	1.46	1.07	67	46.3	43.1	35.3	1.902	2.228	2	12
15:55	5.3	110	1.58	18.5	1.73	1.1	89	53.2	48.5	45.5	1.966	2.119	2	12
15:56	4.9	110	1.46	17.1	1.6	1.1	84	54.1	49.4	44.4	1.895	1.996	2	12
15:58	4.6	110	1.38	16.1	1.51	1.1	76	51.7	47.1	41.1	1.852	2.122	2	12
15:59	4.9	111	1.46	17.1	1.59	1.09	81	51.8	47.5	42.3	1.907	1.981	2	12
16:01	4.9	111	1.45	17	1.59	1.09	81	52.4	47.9	42.9	1.897	2.046	2	12
16:02	4.7	111	1.4	16.5	1.54	1.1	81	54.2	49.3	43.2	1.885	2.154	2	12
16:03	4.8	111	1.43	16.8	1.56	1.09	79	51.4	47.3	40.5	1.936	2.132	2	12
16:05	4.7	114	1.41	16.5	1.54	1.09	79	52.5	48	41.1	1.918	2.019	2	12
16:06	4.8	114	1.44	16.9	1.58	1.09	80	52	47.6	42.6	1.884	1.961	2	12
16:08	4.6	114	1.37	16.1	1.5	1.09	80	54.3	49.6	42.9	1.856	2.089	2	12
16:09	4.9	115	1.45	17	1.58	1.09	81	52.5	48.3	42.6	1.912	2.051	2	12
16:11	5.1	115	1.53	18	1.67	1.09	83	51.1	46.9	41.1	2.025	2.208	2	12
16:12	4.7	115	1.41	16.5	1.55	1.1	82	54.4	49.5	41.7	1.958	2.064	2	12
16:14	4.7	115	1.39	16.3	1.53	1.1	81	54.3	49.5	41.1	1.964	2.184	2	12
16:15	4.8	115	1.42	16.7	1.57	1.1	81	53.2	48.4	42.6	1.901	2.1	2	12
16:16	4.7	115	1.41	16.6	1.56	1.1	82	54.6	49.6	44.1	1.87	2.066	2	12
16:18	4.9	115	1.47	17.2	1.62	1.1	82	52.6	47.7	42.3	1.952	2.098	2	12
16:19	3.9	113	1.17	13.8	1.27	1.08	64	50.3	46.3	38.5	1.654	2.074	2	12
16:21	5.5	113	1.64	19.2	1.79	1.09	90	51.3	47.1	45.1	1.988	2.007	2	12
16:22	5.3	113	1.58	18.5	1.74	1.1	86	51.3	46.6	45.8	1.888	2.068	2	12
16:23	5	113	1.51	17.6	1.67	1.11	84	52	47	44.1	1.896	2.013	2	12
16:25	4.8	113	1.44	16.9	1.59	1.1	86	55.6	50.4	48.4	1.776	2.045	2	12
16:26	4.9	113	1.46	17.2	1.63	1.11	84	53.2	47.9	46.5	1.796	1.942	2	12
16:27	4.8	113	1.44	16.8	1.6	1.11	82	53.6	48.2	43.5	1.89	1.997	2	12
16:29	5	113	1.49	17.5	1.66	1.11	83	52.6	47.4	42.6	1.962	2.113	2	12
16:30	4.7	113	1.41	16.5	1.55	1.1	81	53.6	48.8	42.6	1.9	2.078	2	12
16:31	5	113	1.5	17.6	1.64	1.09	84	52.5	47.9	43.2	1.944	2.11	2	12
16:33	5.1	113	1.54	18	1.69	1.1	81	49.6	45	40.3	2.015	2.199	2	12
16:34	5	113	1.5	17.6	1.65	1.1	86	53.4	48.5	44.1	1.94	2.213	2	12
16:36	4.3	113	1.27	14.9	1.39	1.09	66	48.5	44.4	38.5	1.723	1.989	2	12
16:37	5.3	113	1.57	18.4	1.73	1.1	85	50.9	46.4	42.9	1.988	2.019	2	12
16:39	3.6	113	1.09	12.7	1.15	1.06	46	39.1	37	26.4	1.73	2.113	2	12
16:41	6	113	1.78	20.9	1.89	1.06	87	45.9	43.4	40.3	2.155	2.139	2	12
16:42	5.1	113	1.53	17.9	1.65	1.08	83	51.2	47.3	43.8	1.905	2.238	2	12
16:44	5.1	113	1.54	18	1.64	1.07	80	49	45.8	42.3	1.901	2.044	2	12
16:45	5	113	1.49	17.5	1.62	1.09	80	50.6	46.4	42	1.917	2.024	2	12
16:47	5.1	113	1.53	17.9	1.65	1.08	82	50.6	46.9	41.7	1.972	2.217	2	12
16:48	5.1	113	1.52	17.8	1.65	1.09	84	51.9	47.7	46.2	1.824	1.962	2	12
16:49	5.1	113	1.53	17.9	1.67	1.09	87	53.3	48.8	47.2	1.843	1.952	2	12
16:51	4.8	113	1.42	16.7	1.56	1.09	87	57.2	52.2	44.4	1.952	2.155	2	12
16:52	4.9	113	1.47	17.2	1.63	1.11	85	54.2	48.9	43.5	1.953	2.213	2	12
16:53	4.9	113	1.47	17.3	1.63	1.11	90	57.1	51.5	45.5	1.972	2.009	2	12
16:55	4.8	114	1.44	16.9	1.63	1.13	90	58.6	51.7	46.9	1.918	2.161	2	14
16:56	4.9	114	1.46	17	1.63	1.12	89	57.5	51.4	45.1	1.974	2.097	2	14
16:57	4.9	114	1.45	17	1.66	1.14	95	61.7	54	49.2	1.938	2.143	2	14
16:59	4.8	114	1.42	16.6	1.61	1.13	83	54.7	48.3	40.8	2.023	2.111	2	14
17:00	4.7	113	1.4	16.4	1.59	1.13	87	58.1	51.3	46.5	1.869	2.181	2	14
17:01	5	113	1.5	17.5	1.68	1.12	88	55.1	49.1	44.4	1.978	1.991	2	14
17:03	5	113	1.48	17.4	1.66	1.12	85	53.9	48.1	43.2	1.974	2.276	2	14
17:04	4.9	113	1.48	17.3	1.66	1.12	87	54.9	48.9	46.9	1.847	2.018	2	14
17:05	5	113	1.5	17.6	1.68	1.12	86	53.9	48.1	44.1	1.952	2.084	2	14
17:07	5.1	113	1.54	18	1.71	1.11	85	52.1	46.9	42.9	1.989	2.143	2	14
17:08	5.1	113	1.51	17.7	1.68	1.11	87	53.9	48.4	45.1	1.922	2.052	2	14
17:09	4.8	113	1.45	17	1.62	1.12	85	54.8	48.9	44.1	1.917	2.033	2	14
17:11	4.9	113	1.45	17	1.6	1.11	77	50.2	45.4	33	2.326	2.624	2	14
17:12	5.3	113	1.57	18.4	1.74	1.11	88	52.5	47.5	45.1	1.95	2.056	2	14
17:14	5	113	1.48	17.4	1.65	1.11	86	54.1	48.6	45.5	1.883	2.084	2	14
17:15	4.9	115	1.47	17.2	1.64	1.11	85	54.4	48.9	41.4	2.054	2.241	2	14
17:17	4.9	115	1.45	17	1.62	1.11	87	56.3	50.6	46.5	1.876	2.06	2	14
17:18	4.9	115	1.48	17.3	1.65	1.12	86	54.3	48.7	44.4	1.925	2.065	2	14
17:19	5.1	114	1.52	17.8	1.7	1.12	89	54.7	48.9	48	1.855	2.04	2	14
17:20	5.1	114	1.54	18	1.7	1.11	90	55	49.6	48	1.878	1.958	2	14
17:22	5.2	114	1.55	18.1	1.72	1.11	88	53.6	48	43.8	2.01	2.131	2	14
17:23	4.8	114	1.43	16.8	1.6	1.12	85	55.6	49.8	46.2	1.846	2.099	2	14
17:24	5	114	1.48	17.4	1.65	1.11	86	54.1	48.5	46.5	1.846	1.941	2	14
17:26	4.9	114	1.47	17.2	1.62	1.1	83	53	48.1	45.1	1.848	1.98	2	14
17:27	4.5	114	1.33	15.6	1.46	1.1	70	48.7	44.4	39.2	1.773	2.043	2	14
17:29	5.3	114	1.57	18.4	1.72	1.1	84	50.4	46	41.1	2.045	2.145	2	14
17:30	4.9	114	1.46	17.1	1.61	1.1	89	57	51.7	49.6	1.801	2.107	2	14
17:31	5.4	114	1.61	18.8	1.79	1.12	92	53.8	48.2	48.8	1.89	1.939	2	14
17:32	4.9	114	1.48	17.3	1.64	1.11	88	55.9	50.3	44.8	1.965	2.089	2	14
17:34	5	114	1.49	17.4	1.67	1.12	87	54.5	48.5	46.5	1.866	2.086	2	14
17:35	5.2	114	1.56	18.2	1.72	1.1	89	53.9	48.8	43.8	2.036	2.054	2	14
17:37	5	114	1.5	17.6	1.68	1.12	85	53.3	47.6	41.7	2.041	2.161	2	14
17:38	4.8	114	1.44	16.9	1.61	1.12	87	56.6	50.7	46.5	1.872	2.149	2	14
17:39	4.8	114	1.42	16.7	1.59	1.12	83	54.8	48.9	44.8	1.861	1.916	2	14
17:41	4.8	114	1.44	16.8	1.6	1.11	82	53.2	47.9	44.8	1.827	2.036	2	14
17:42	4.9	114	1.46	17.1	1.61	1.11	84	53.9	48.8	44.1	1.902	1.992	2	14
17:43	4.6	114	1.39	16.3	1.53	1.1	82	54.8	49.7	45.5	1.795	2.07	2	14
17:45	4.9	114	1.47	17.2	1.61	1.09	85	53.9	49.4	44.1	1.919	2.105	2	14
17:46	5.2	114	1.54	18.1	1.72	1.11	89	53.8	48.4	46.9	1.894	2.012	2	14
17:47	5.5	114	1.65	19.3	1.82	1.11	90	51.5	46.6	42.6	2.112	2.163	2	14
17:48	4.8	114	1.45	17	1.62	1.12	89	57.6	51.3	49.2	1.816	2.135	2	14
17:50	5.2	113	1.54	18	1.72	1.12	89	54.3	48.5	43.5	2.044	2.035	2	14
17:51	5.2	113	1.55	18.2	1.72	1.11	89	54	48.6	44.8	1.991	2.245	2	14
17:52	5.1	113	1.52	17.8	1.71	1.12	90	55.7	49.5	45.5	1.981	2.069	2	14
17:54	4.8	113	1.43	16.8	1.6	1.12	88	57.4	51.4	48.4	1.821	2.088	2	14
17:55	4.9	114	1.45	17	1.65	1.13	90	58	51.1	48	1.873	2.064	2	14
17:56	4.8	114	1.45	17	1.62	1.12	88	56.7	50.7	45.5	1.927	2.067	2	14
17:58	5.1	114	1.51	17.7	1.69	1.12	88	54.5	48.6	44.1	1.985	2.088	2	14
17:59	4.9	114	1.45	17	1.62	1.12	86	55.9	49.9	43.5	1.984	2.215	2	14
18:00	4.9	114	1.47	17.2	1.63	1.11	84	53.5	48.4	41.7	2.009	2.138	2	14
18:02	4.9	114	1.47	17.2	1.62	1.1	85	54.3	49.3	43.2	1.966	2.076	2	14
18:03	5.1	114	1.53	17.9	1.69	1.11	88	54.1	48.8	45.5	1.936	2.139	2	14
18:05	5.2	114	1.54	18.1	1.72	1.12	87	52.8	47.2	43.5	1.994	2.172	2	14
18:06	5.1	114	1.52	17.8	1.7	1.12	91	56.2	50.2	48.8	1.874	2.16	2	14
18:07	5	114	1.5	17.6	1.69	1.12	88	54.8	48.9	44.1	1.989	2.002	2	14
18:09	5.1	114	1.53	17.9	1.7	1.11	87	53.4	48.1	43.8	1.984	2.205	2	14
18:10	5	114	1.5	17.6	1.66	1.11	85	53	47.8	42.9	1.974	2.109	2	14
18:11	4.7	114	1.42	16.6	1.57	1.11	84	55.2	49.8	44.4	1.881	2.089	2	14
18:13	5.2	114	1.57	18.3	1.74	1.11	90	53.9	48.4	45.8	1.961	2.113	2	14
18:14	5.1	114	1.53	17.9	1.68	1.1	84	51.8	47.1	40.3	2.084	2.285	2	14
18:15	4.8	114	1.43	16.8	1.61	1.13	88	57.6	51.2	46.2	1.907	2.243	2	14
18:17	4.8	114	1.45	16.9	1.61	1.11	84	54.2	48.8	43.2	1.938	2.03	2	14
18:18	5.2	114	1.55	18.1	1.73	1.11	89	54.4	48.8	44.1	2.028	2.145	2	14
18:19	5.3	116	1.59	18.6	1.79	1.13	93	55.4	49	46.5	2.01	2.228	2	14
18:21	5	116	1.5	17.5	1.67	1.12	89	55.6	49.7	44.8	1.977	2.079	2	14
18:23	3.8	116	1.12	13.2	1.26	1.13	58	49.2	43.7	26	2.247	2.819	2	14
18:24	5.2	115	1.57	18.4	1.75	1.12	90	53.7	48.2	46.2	1.946	2.171	2	14
18:26	4.3	115	1.3	15.2	1.34	1.03	63	45.2	43.9	34.5	1.823	1.719	2	14
18:27	5.4	115	1.61	18.8	1.73	1.08	88	51.1	47.3	48.4	1.815	2.074	2	14
18:29	5.5	115	1.64	19.2	1.75	1.06	86	49.4	46.4	42.9	2.012	2.172	2	14
18:30	5	117	1.5	17.6	1.63	1.08	86	53.5	49.4	48.8	1.769	1.888	2	14
18:31	5.1	117	1.53	18	1.67	1.09	85	51.9	47.5	45.8	1.856	1.962	2	14
18:33	5.2	117	1.56	18.3	1.71	1.09	88	52.7	48.2	48	1.835	2.004	2	14
18:34	5.2	117	1.56	18.3	1.72	1.1	90	53.9	48.9	51.3	1.758	1.965	2	14
18:35	5.5	116	1.65	19.4	1.82	1.1	91	51.8	47	45.8	1.99	1.987	2	14
18:37	3.7	116	1.11	13	1.18	1.07	46	38.8	36.4	24.6	1.869	2.286	2	14
18:39	5.9	116	1.77	20.8	1.89	1.06	92	48.7	45.8	44.4	2.062	2.152	2	14
18:40	5	114	1.51	17.7	1.64	1.09	85	52.8	48.6	47.2	1.805	2.068	2	14
18:41	5.2	114	1.55	18.2	1.68	1.08	86	51.8	47.8	47.2	1.823	1.885	2	14
18:43	4.4	114	1.32	15.5	1.43	1.08	71	49.8	46.1	43.8	1.625	1.854	2	14
18:44	4.7	114	1.41	16.5	1.52	1.08	82	54.2	50.2	50.4	1.635	1.814	2	14
18:45	4.8	115	1.42	16.6	1.51	1.07	81	52.8	49.6	47.6	1.696	1.76	2	14
18:46	4	115	1.19	14	1.29	1.08	72	55.4	51.4	48.4	1.489	1.807	2	14
18:48	4.3	115	1.28	15	1.31	1.03	65	47.1	45.9	37.5	1.728	1.837	2	14
18:49	5.7	114	1.7	19.9	1.78	1.05	85	46.4	44.3	49.2	1.724	1.643	2	14
18:51	4.3	114	1.29	15.1	1.35	1.05	72	51.7	49.3	45.8	1.573	1.916	2	14
18:52	5.1	114	1.51	17.7	1.6	1.06	80	48.9	46.4	53.1	1.516	1.672	2	14
18:53	4.9	114	1.45	17	1.52	1.05	75	48	45.7	45.8	1.64	1.747	2	14
18:55	4.2	114	1.26	14.7	1.29	1.02	59	43.5	42.6	33.1	1.774	1.937	2	14
18:55	Recovery
18:56	5.6	114	1.67	19.6	1.72	1.03	84	46.8	45.4	44.1	1.893	1.959	2	14
18:57	5.2	114	1.56	18.3	1.65	1.05	87	52	49.3	48	1.813	2.088	2	14
18:59	5.1	114	1.52	17.8	1.63	1.08	88	54	50.2	50	1.76	1.944	2	14
19:00	5.1	113	1.52	17.8	1.62	1.06	85	52.3	49.2	46.5	1.834	1.928	1.7	0
19:01	4.8	113	1.43	16.8	1.56	1.09	85	55.4	51	47.2	1.801	2.026	1.7	0
19:02	4.8	113	1.43	16.7	1.55	1.09	82	53.4	49.2	45.5	1.798	1.923	1.7	0
19:04	5	113	1.49	17.5	1.6	1.07	83	52.3	48.9	44.8	1.863	2.018	1.7	0
19:05	4.9	113	1.48	17.3	1.59	1.08	84	52.9	49.1	46.2	1.814	1.938	1.7	0
19:06	4.9	113	1.47	17.2	1.58	1.07	87	55.2	51.4	47.6	1.822	1.962	1.7	0
19:08	5	113	1.49	17.5	1.63	1.09	84	52.3	47.9	46.5	1.799	1.961	1.7	0
19:09	4.9	113	1.47	17.2	1.6	1.09	81	51.3	47.1	42.6	1.892	1.986	1.7	0
19:10	4.7	112	1.4	16.4	1.52	1.09	81	54.4	50	45.5	1.79	2.03	1.7	0
19:12	4.7	112	1.41	16.5	1.54	1.09	82	54.4	49.7	42.6	1.92	2.061	1.7	0
19:13	4.6	112	1.37	16.1	1.49	1.09	78	53	48.8	43.2	1.804	2.009	1.7	0
19:14	4.7	111	1.42	16.6	1.55	1.1	82	54.2	49.5	46.5	1.772	2.008	1.7	0
19:16	4.4	111	1.33	15.5	1.45	1.1	79	55.4	50.5	46.5	1.699	1.836	1.7	0
19:17	4.7	111	1.41	16.5	1.53	1.08	78	51.9	47.9	42	1.865	1.926	1.7	0
19:19	4.5	111	1.35	15.8	1.47	1.09	75	52.1	47.9	42.6	1.773	2.007	1.7	0
19:20	4.6	111	1.36	15.9	1.47	1.08	74	50.1	46.5	50.4	1.473	1.505	1.7	0
19:21	5	111	1.51	17.7	1.62	1.08	83	51.5	47.8	46.9	1.777	1.922	1.7	0
19:22	4.6	111	1.37	16	1.49	1.09	82	55.4	50.8	49.2	1.662	1.965	1.7	0
19:25	3.3	110	0.98	11.5	1.01	1.03	47	44.7	43.4	26.8	1.759	1.604	1.7	0
19:26	5.5	110	1.63	19.1	1.68	1.03	80	45.5	44.4	47.2	1.693	1.874	1.7	0
19:28	4.8	110	1.43	16.7	1.45	1.01	64	42	41.4	33	1.94	1.956	1.7	0
19:29	4.2	109	1.27	14.8	1.31	1.03	63	46.6	45.2	36.8	1.725	1.91	1.7	0
19:31	5.4	109	1.62	19	1.65	1.02	78	44.8	44	43.8	1.779	1.891	1.7	0
19:32	5.2	109	1.55	18.1	1.62	1.05	79	47.7	45.5	45.5	1.743	1.952	1.7	0
19:33	5.3	109	1.59	18.6	1.66	1.05	80	47.4	45.3	44.1	1.824	1.857	1.7	0
19:35	4.8	107	1.44	16.9	1.53	1.06	76	49.1	46.2	43.5	1.749	2.044	1.7	0
19:36	4.9	107	1.46	17.1	1.57	1.07	79	50.7	47.4	44.1	1.801	1.92	1.7	0
19:37	4.7	107	1.4	16.4	1.5	1.07	76	50.9	47.4	42.9	1.781	1.924	1.7	0
19:39	4.3	107	1.29	15.1	1.39	1.08	71	51	47.2	42.6	1.669	1.845	1.7	0
19:40	4.4	106	1.31	15.4	1.4	1.07	70	49.8	46.7	40.3	1.742	1.883	1.7	0
19:42	4.2	106	1.25	14.6	1.3	1.04	63	47.2	45.4	36.1	1.752	1.833	1.7	0
19:43	4.5	106	1.35	15.8	1.43	1.06	75	51.9	49	41.4	1.812	1.909	1.7	0
19:45	4	108	1.21	14.2	1.32	1.09	77	59.3	54.4	42.6	1.805	2.041	1.7	0
19:46	4	108	1.21	14.1	1.36	1.12	77	59.7	53.2	40.5	1.898	2.035	1.7	0
19:48	4	108	1.2	14	1.34	1.12	75	58.5	52.1	42	1.788	1.906	1.7	0
19:49	3.9	105	1.15	13.5	1.28	1.11	74	59.5	53.5	42.6	1.729	1.931	1.7	0
19:51	4.1	105	1.24	14.5	1.36	1.1	70	52.6	47.8	40	1.747	1.828	1.7	0
19:52	4.1	105	1.21	14.2	1.3	1.07	66	50.5	47.2	36.4	1.808	1.991	1.7	0
19:54	4.2	105	1.26	14.7	1.36	1.08	69	51.4	47.6	39.5	1.757	1.816	1.7	0
19:55	4.1	101	1.22	14.3	1.32	1.08	72	54.5	50.6	43.5	1.654	1.874	1.7	0
19:57	4.3	101	1.29	15.1	1.39	1.08	71	51.7	48	40.3	1.774	1.853	1.7	0
19:58	3.9	101	1.16	13.6	1.24	1.07	65	51.7	48.5	41.7	1.561	1.828	1.7	0
20:00	4	107	1.2	14	1.28	1.06	66	51.4	48.2	38.2	1.731	1.869	1.7	0
20:01	4	107	1.18	13.8	1.26	1.07	66	51.7	48.6	42.6	1.556	1.689	1.7	0
20:03	4.1	107	1.23	14.4	1.3	1.06	67	50.4	47.8	41.4	1.618	1.754	1.7	0
20:04	4.3	107	1.27	14.9	1.35	1.06	68	49.5	46.9	41.4	1.645	1.748	1.7	0
20:06	4.5	105	1.33	15.6	1.4	1.05	69	48	45.8	41.4	1.667	1.786	1.7	0
20:07	4.1	105	1.22	14.2	1.28	1.05	65	50.1	47.7	38	1.722	1.882	1.7	0
20:09	3.9	105	1.18	13.8	1.23	1.04	62	48.4	46.4	40.8	1.513	1.715	1.7	0
20:10	4.1	101	1.22	14.3	1.26	1.03	60	45.9	44.4	36.1	1.667	1.786	1.7	0
20:12	4.7	101	1.4	16.4	1.47	1.04	69	45.9	44	39	1.775	1.843	1.7	0
20:13	4.4	101	1.31	15.4	1.37	1.04	66	46.7	44.7	39.2	1.681	1.77	1.7	0
20:15	3.8	100	1.14	13.3	1.18	1.04	61	49.9	47.9	38.2	1.603	1.833	1.7	0
20:16	4.6	100	1.36	16	1.42	1.04	66	45.3	43.5	37.7	1.757	1.792	1.7	0
20:18	4.5	100	1.34	15.7	1.4	1.05	70	48.6	46.5	40.3	1.735	1.901	1.7	0
20:19	4.3	100	1.3	15.2	1.38	1.06	68	48.8	45.8	39	1.746	1.76	1.7	0
20:21	4.1	100	1.23	14.4	1.3	1.06	66	50	47.2	41.4	1.6	1.759	1.7	0
20:22	3.9	100	1.17	13.7	1.25	1.07	62	49.1	45.9	39.2	1.582	1.706	1.7	0
20:25	3.2	98	0.95	11.2	1.01	1.06	48	47.2	44.6	28.6	1.694	1.664	1.7	0
20:26	4.1	98	1.22	14.3	1.25	1.03	60	45.3	44.2	37.7	1.587	1.794	1.7	0
20:28	4	98	1.21	14.1	1.25	1.03	63	48.1	46.5	38	1.648	1.694	1.7	0
20:29	3.6	99	1.07	12.6	1.16	1.08	60	51.9	48.2	35.5	1.69	1.879	1.7	0
20:31	3.5	99	1.05	12.3	1.13	1.07	59	51.5	48.1	38.2	1.541	1.673	1.7	0
20:33	3.8	99	1.13	13.2	1.2	1.06	59	48.8	46	36.6	1.623	1.753	1.7	0
20:34	3.9	95	1.15	13.5	1.22	1.06	62	49.8	47	38.2	1.62	1.731	1.7	0
20:37	3.3	95	1	11.7	1.08	1.09	50	46.7	43	23.9	2.071	2.379	1.7	0
20:38	3.8	95	1.14	13.3	1.18	1.04	57	46.3	44.7	40.3	1.428	1.4	1.7	0
20:40	4.1	95	1.24	14.5	1.29	1.04	62	45.9	44.3	40.8	1.515	1.593	1.7	0
20:41	3.8	95	1.14	13.3	1.18	1.04	59	47.2	45.6	39.7	1.474	1.599	1.7	0
20:43	3.9	95	1.16	13.6	1.21	1.04	59	46.8	44.9	38.5	1.53	1.602	1.7	0
20:44	4.1	98	1.23	14.5	1.28	1.04	60	45.1	43.4	37.7	1.593	1.596	1.7	0
20:46	3.4	98	1.01	11.8	1.04	1.03	56	50.7	49.2	41.1	1.366	1.586	1.7	0
20:47	3.8	98	1.15	13.4	1.2	1.05	57	46	44	36.1	1.579	1.658	1.7	0
20:49	3.6	100	1.08	12.7	1.12	1.04	53	45.1	43.5	35.5	1.492	1.579	1.7	0
20:51	3.6	100	1.06	12.4	1.09	1.03	52	45.3	44	34.1	1.532	1.695	1.7	0
20:52	3.8	100	1.13	13.3	1.17	1.03	55	44.7	43.5	38.2	1.447	1.481	1.7	0
20:54	3.7	100	1.1	12.8	1.12	1.02	53	44.4	43.4	37.3	1.424	1.49	1.7	0
20:56	3.7	99	1.09	12.8	1.12	1.02	54	45.1	44.3	39	1.387	1.514	1.7	0
20:57	3.8	99	1.12	13.2	1.16	1.03	56	45.5	44.1	37.3	1.491	1.565	1.7	0
20:59	3.3	99	0.99	11.6	1.05	1.06	54	50.3	47.5	34.5	1.561	1.72	1.7	0
21:01	3.2	97	0.94	11	1.01	1.07	55	54.1	50.4	36.4	1.522	1.595	1.7	0
21:02	3.2	97	0.96	11.3	1.05	1.09	55	52.3	47.8	37.3	1.468	1.605	1.7	0
21:04	3.4	97	1.03	12	1.11	1.08	57	50.8	47	38.7	1.466	1.497	1.7	0
21:05	2.8	96	0.84	9.9	0.9	1.06	47	49.7	46.7	37.7	1.233	1.412	1.5	0
21:07	2.8	96	0.85	9.9	0.9	1.06	45	47.7	45	35.9	1.248	1.339	1.5	0
21:09	2.9	96	0.86	10	0.88	1.03	43	44.8	43.7	38.2	1.125	1.304	1.5	0
21:10	3.1	93	0.94	11	0.95	1.01	45	43.4	42.9	35.1	1.276	1.262	1.4	0
21:12	3.4	93	1.01	11.9	1.03	1.02	49	44	43.1	36.1	1.355	1.43	1.4	0
21:14	1.9	96	0.56	6.6	0.58	1.04	29	45.8	44.2	26.3	1.094	1.564	1.4	0
21:16	2.3	96	0.7	8.2	0.68	0.97	33	41.8	43.1	35.1	0.953	0.777	1.4	0
21:18	3.4	96	1	11.7	0.96	0.96	43	38.4	40.1	36.1	1.184	1.302	1.4	0
21:19	2.8	96	0.84	9.9	0.79	0.94	38	39.6	42.4	34.1	1.1	1.242	0	0
21:21	3.4	96	1.02	11.9	0.96	0.94	43	38.2	40.7	34.9	1.237	1.324	0	0
21:24		96	0.28	3.2	0.25	0.92	18	57.5	62.9	21.4	0.859	1.204	0	0
21:40		91								3.8			0	0
21:55		90								3.8			0	0
	METS	HR	V'O2	V'O2/kg	V'CO2	RER	V'E	VE/VO2	VE/VCO2	RR	VTex	VTin	Speed	Elev
media	4.07974	102.613	1.21767	14.265	1.2116	0.979676	58.6667	43.5761	44.1451	35.0561	1.64334	1.78359	1.91871	6.69113
var	0.688988	81.2586	0.06292	8.63618	0.117271	0.0105393	386.868	63.3819	14.8706	64.3932	0.09612	0.118379	0.066273	26.4759
	4.0746	102.613	1.21767	14.265	1.2116	0.979676	58.6667	43.5761	44.1451	35.0561	1.63804	1.77783	1.91871	6.69113
	0.704232	81.2586	0.06292	8.63618	0.117271	0.0105393	386.868	63.3819	14.8706	64.3932	0.104507	0.128242	0.066273	26.4759
	METS						HR						VO2						VO2/KG						VCO2						RER						VE						VE/VO2						VE/VCO2
	Rest		Test		Recovery		Rest		Test		Recovery		Rest		Test		Recovery		Rest		Test		Recovery		Rest		Test		Recovery		Rest		Test		Recovery		Rest		Test		Recovery		Rest		Test		Recovery		Rest
	MEDIA	VAR	MEDIA	VAR	MEDIA	VAR	MEDIA	VAR	MEDIA	VAR	MEDIA	VAR	MEDIA	VAR	MEDIA	VAR	MEDIA	VAR	MEDIA	VAR	MEDIA	VAR	MEDIA	VAR	MEDIA	VAR	MEDIA	VAR	MEDIA	VAR	MEDIA	VAR	MEDIA	VAR	MEDIA	VAR	MEDIA	VAR	MEDIA	VAR	MEDIA	VAR	MEDIA	VAR	MEDIA	VAR	MEDIA	VAR	MEDIA
	1.55	0.411818	4.07217	0.724128	4.12083	0.501877	75.5	0.454545	102.461	88.522	103.414	42.7757	0.4625	0.0360568	1.21691	0.0647391	1.22175	0.0537021	5.425	4.99659	14.2574	8.8846	14.3062	7.3785	0.445	0.0244636	1.19664	0.125361	1.29196	0.0669284	0.965385	0.0156103	0.965758	0.0110333	1.05443	0.00127494	22.4167	37.3561	57.4203	412.421	65.3608	198.775	45.0538	78.3944	42.4866	64.1414	49.4278	18.886	46.3
	METS						HR						VO2						VCO2						RER						VE						Vtex						Vtin						LABEL
	Rest		Test		Recovery		Rest		Test		Recovery		Rest		Test		Recovery		Rest		Test		Recovery		Rest		Test		Recovery		Rest		Test		Recovery		Rest		Test		Recovery		Rest		Test		Recovery
	MEDIA	VAR	MEDIA	VAR	MEDIA	VAR	MEDIA	VAR	MEDIA	VAR	MEDIA	VAR	MEDIA	VAR	MEDIA	VAR	MEDIA	VAR	MEDIA	VAR	MEDIA	VAR	MEDIA	VAR	MEDIA	VAR	MEDIA	VAR	MEDIA	VAR	MEDIA	VAR	MEDIA	VAR	MEDIA	VAR	MEDIA	VAR	MEDIA	VAR	MEDIA	VAR	MEDIA	VAR	MEDIA	VAR	MEDIA	VAR	BIN
	1.55	0.411818	4.07217	0.724128	4.12083	0.501877	75.5	0.454545	102.461	88.522	103.414	42.7757	0.4625	0.0360568	1.21691	0.0647391	1.22175	0.0537021	0.445	0.0244636	1.19664	0.125361	1.29196	0.0669284	0.965385	0.0156103	0.965758	0.0110333	1.05443	0.00127494	22.4167	37.3561	57.4203	412.421	65.3608	198.775	1.06869	0.143227	1.64617	0.104865	1.62809	0.0494756	1.31017	0.150016	1.78821	0.129344	1.75878	0.0594826	0
[truncated: 37 more columns]
