# Supplementary material for: On the development of diagnostic support algorithms based on CPET biosignals data via machine learning and wavelets
Source: PeerJ journal article supplement (doi:10.7717/peerj-cs.2474), 2025-01-30
Supplement: raw_data.zip [file Subject03_BxB.xlsx]

## Sheet: Demographics
Gender:	Male
Age:	60
Height (cm):	188
Weight (kg):	132.6
BMI:	38
Condition:	HFrEf

## Sheet: Subject03_BxB
Time	METS		HR		V'O2		V'CO2		RER		V'E		VTex		VTin
min			1/min		L/min		L/min				L/min		L		L
00:00	Rest
02:07													0		0
02:10	2.6		100		1.18		0.94		0.79		33		1.648		1.728
02:13	2.8		100		1.32		1.11		0.84		43		1.827		1.982
02:15	3		100		1.38		1.2		0.88		52		1.812		1.962
02:17	2.4		100		1.09		1		0.92		43		1.765		1.74
02:20	1.6		100		0.76		0.75		0.98		32		1.649		1.771
02:26	1.4		100		0.67		0.67		1		25		2.276		1.95
02:30	1.5		101		0.71		0.71		1.01		27		1.839		2.161
02:33	1.5		101		0.7		0.69		0.99		28		1.309		1.236
02:36	1.3		101		0.6		0.6		1		25		1.306		1.432
02:39	1.2		100		0.54		0.54		1		22		1.216		1.247
02:43	1.2		100		0.54		0.53		0.98		21		1.167		1.148
02:47	1.5		98		0.69		0.68		0.99		25		1.755		1.74
02:47	Test
02:49	1.1		96		0.52		0.49		0.93		20		0.919		0.882
02:52	1.6		96		0.72		0.64		0.9		25		0.872		0.68
02:54	1.4		96		0.64		0.57		0.89		23		0.861		0.809
02:57	1.7		96		0.79		0.72		0.91		27		1.429		1.441
02:59	2		96		0.94		0.83		0.88		32		1.122		1.137
03:02	1.8		97		0.84		0.75		0.89		30		1.344		1.341
03:04	1.9		97		0.9		0.8		0.88		32		1.115		1.105
03:07	1.9		100		0.87		0.8		0.91		33		1.395		1.458
03:09	2		101		0.91		0.85		0.93		34		1.553		1.669
03:12	1.9		101		0.86		0.8		0.93		32		1.287		1.207
03:14	2		101		0.92		0.85		0.92		36		1.202		1.204
03:16	2		100		0.94		0.87		0.92		35		1.272		1.157
03:18	1.8		100		0.82		0.77		0.94		34		1.175		1.297
03:20	1.9		102		0.86		0.81		0.95		33		1.192		1.173
03:22	1.8		102		0.84		0.8		0.94		32		1.183		1.187
03:25	1.6		101		0.73		0.7		0.95		28		1.235		1.338
03:27	1.8		101		0.85		0.79		0.93		31		1.188		1.158
03:30	1.8		99		0.82		0.75		0.92		29		1.128		1.168
03:32	1.7		99		0.78		0.71		0.9		28		1.046		0.987
03:35	1.8		98		0.83		0.77		0.92		29		1.435		1.657
03:40	1.7		98		0.77		0.69		0.9		23		1.901		1.587
03:42	2.3		98		1.07		0.91		0.85		33		1.118		1.269
03:44	2.4		98		1.1		0.94		0.85		37		1.185		1.255
03:46	2.1		100		0.97		0.85		0.87		32		1.12		1.196
03:48	2.3		100		1.07		0.96		0.89		39		1.38		1.473
03:50	2.4		100		1.13		1.02		0.9		41		1.516		1.434
03:53	2.1		100		0.96		0.9		0.94		36		1.54		1.665
03:55	2.2		106		1		0.94		0.94		37		1.652		1.624
03:58	2.1		106		1		0.94		0.94		36		1.652		1.51
04:01	1.9		115		0.9		0.87		0.96		32		1.477		1.684
04:03	2		115		0.93		0.89		0.95		36		1.392		1.414
04:06	2.1		112		0.95		0.91		0.95		36		1.437		1.472
04:07	1.7		112		0.77		0.71		0.93		28		0.891		0.872
04:10	1.6		106		0.76		0.69		0.91		27		0.915		0.885
04:12	1.8		106		0.83		0.76		0.92		29		1.043		1.152
04:14	1.9		106		0.88		0.79		0.91		32		1.024		1.1
04:16	2.2		106		1.01		0.92		0.91		34		1.209		1.244
04:18	2.3		106		1.06		0.96		0.91		35		1.245		1.232
04:20	2.1		105		1		0.92		0.92		34		1.338		1.446
04:22	2.4		105		1.1		1.02		0.93		39		1.435		1.487
04:25	2.1		104		0.99		0.91		0.92		33		1.135		1.11
04:27	2.4		104		1.11		1.03		0.93		39		1.38		1.409
04:30	2.4		104		1.09		1.07		0.98		39		2.134		2.263
04:33	2		104		0.95		0.93		0.98		32		1.775		1.666
04:36	2		105		0.93		0.92		0.99		34		1.586		1.937
04:38	2.5		105		1.18		1.15		0.97		42		1.52		1.454
04:40	2		106		0.94		0.91		0.97		35		1.151		1.224
04:42	2.1		106		0.97		0.93		0.96		34		1.189		1.082
04:45	2.1		107		0.96		0.93		0.97		34		1.267		1.374
04:47	2.3		107		1.09		1.04		0.95		37		1.273		1.131
04:49	2.2		107		1.03		1		0.97		35		1.438		1.605
04:52	2.1		108		0.97		0.96		0.98		34		1.4		1.493
04:54	2		108		0.94		0.91		0.97		34		1.358		1.394
04:56	1.8		109		0.86		0.82		0.96		30		1.081		1.183
05:00	1.4		110		0.67		0.64		0.95		21		1.405		1.363
05:02	2.7		110		1.26		1.18		0.93		41		1.561		1.761
05:04	2.9		111		1.34		1.25		0.93		43		1.401		1.36
05:06	2.1		111		0.96		0.91		0.95		32		1.163		1.271
05:09	2.1		111		0.97		0.94		0.97		36		1.247		1.593
05:11	2.7		111		1.23		1.11		0.9		33		1.543		0.763
05:13	2		111		0.94		0.87		0.92		37		1.035		1.613
05:15	2		112		0.95		0.89		0.94		33		1.035		1.253
05:17	2.8		112		1.32		1.24		0.94		44		1.51		1.397
05:19	2.7		113		1.26		1.21		0.97		46		1.83		1.959
05:22	2.6		113		1.21		1.19		0.99		43		1.68		1.761
05:24	2.5		113		1.16		1.15		0.99		44		1.568		1.666
05:26	2.6		113		1.21		1.22		1		44		1.683		1.706
05:28	2.6		113		1.22		1.23		1.01		48		1.537		1.609
05:30	2.6		114		1.21		1.25		1.03		49		1.422		1.485
05:31	2.6		114		1.23		1.26		1.03		50		1.396		1.355
05:33	2.4		114		1.11		1.14		1.03		46		1.457		1.471
05:35	2.5		115		1.15		1.17		1.02		47		1.249		1.182
05:37	2.2		115		1.04		1.07		1.02		43		1.23		1.278
05:39	2.3		115		1.06		1.1		1.03		43		1.463		1.557
05:41	2.4		115		1.14		1.14		1		40		1.636		1.322
05:44	2.1		115		0.99		0.99		1.01		36		1.544		1.895
05:46	2.3		115		1.09		1.09		1		39		1.639		1.732
05:49	2.4		115		1.11		1.1		0.99		40		1.64		1.676
05:51	2.4		115		1.12		1.11		0.99		39		1.607		1.72
05:54	2.3		115		1.07		1.08		1		38		1.841		1.911
05:58	2.3		116		1.04		0.98		0.94		33		1.997		1.845
06:00	2.8		116		1.32		1.26		0.96		46		1.763		1.815
06:02	2.7		116		1.24		1.2		0.97		44		1.675		1.82
06:05	2.5		117		1.15		1.12		0.98		41		1.687		1.703
06:08	2.4		117		1.12		1.13		1.01		38		1.944		2.232
06:10	3		117		1.37		1.35		0.98		49		1.653		1.628
06:12	2.7		117		1.26		1.26		1		46		1.709		1.744
06:14	2.8		118		1.28		1.28		1		47		1.682		1.688
06:17	2.4		118		1.1		1.1		1		40		1.545		1.563
06:19	2.7		118		1.27		1.26		1		47		1.521		1.511
06:21	2.4		118		1.12		1.12		1		41		1.348		1.383
06:23	2.6		118		1.21		1.23		1.02		45		1.621		1.835
06:25	2.8		118		1.28		1.3		1.01		48		1.626		1.604
06:27	2.6		118		1.22		1.23		1.01		44		1.562		1.564
06:29	2.6		118		1.2		1.22		1.01		45		1.587		1.685
06:32	2.5		118		1.14		1.17		1.03		41		1.773		1.836
06:34	2.5		118		1.17		1.2		1.03		43		1.586		1.647
06:37	2.5		118		1.15		1.17		1.02		39		2.004		1.897
06:39	2.5		120		1.18		1.21		1.02		43		1.86		1.987
06:42	2.6		120		1.2		1.24		1.03		43		1.697		1.77
06:44	2.6		121		1.21		1.25		1.03		44		1.832		1.911
06:47	2.5		121		1.15		1.2		1.04		42		1.835		1.966
06:51	2		121		0.93		0.95		1.02		31		2.004		1.756
06:53	3.1		121		1.44		1.43		0.99		48		1.846		2.05
06:55	2.8		121		1.3		1.3		1		46		1.621		1.686
06:58	2.9		121		1.35		1.38		1.01		47		1.76		1.853
07:00	2.8		121		1.29		1.31		1.02		45		1.711		1.733
07:02	2.6		121		1.22		1.27		1.04		47		1.767		1.888
07:04	2.6		122		1.19		1.24		1.05		45		1.716		1.7
07:07	2.4		122		1.12		1.18		1.05		39		1.731		1.808
07:09	2.6		122		1.22		1.27		1.04		43		1.578		1.642
07:11	2.7		122		1.26		1.32		1.05		46		1.708		1.715
07:13	2.7		122		1.25		1.3		1.04		46		1.571		1.682
07:15	2.8		121		1.3		1.35		1.04		48		1.584		1.639
07:18	2.7		121		1.24		1.29		1.05		46		1.684		1.68
07:20	2.4		121		1.11		1.17		1.05		40		1.751		1.837
07:24	2.5		121		1.16		1.2		1.03		39		2.635		2.222
07:27	2.6		121		1.21		1.25		1.03		40		2.005		2.351
07:30	2.6		122		1.21		1.26		1.04		42		1.884		2.057
07:32	2.8		122		1.31		1.37		1.05		48		1.823		1.918
07:35	2.7		122		1.25		1.31		1.05		45		1.699		1.784
07:37	3		122		1.39		1.46		1.06		51		1.897		1.885
07:40	2.6		122		1.19		1.29		1.08		42		2.312		2.323
07:42	2.3		122		1.08		1.13		1.05		39		1.455		1.528
07:45	2.6		123		1.22		1.3		1.06		44		1.741		1.795
07:47	2.5		123		1.16		1.25		1.08		42		1.615		1.833
07:49	2.7		123		1.27		1.36		1.07		47		1.743		1.789
07:51	2.7		123		1.27		1.36		1.08		48		1.622		1.729
07:53	2.6		123		1.23		1.35		1.1		48		1.729		1.699
07:55	2.8		126		1.32		1.45		1.1		53		1.752		1.76
07:57	2.7		126		1.27		1.41		1.11		54		1.589		1.747
07:59	2.8		126		1.32		1.46		1.11		54		1.516		1.446
08:01	2.7		126		1.26		1.4		1.11		51		1.542		1.572
08:03	2.8		126		1.28		1.4		1.1		50		1.62		1.627
08:05	2.7		125		1.26		1.36		1.08		48		1.567		1.469
08:07	2.4		125		1.1		1.2		1.08		44		1.392		1.599
08:08	2.8		125		1.29		1.4		1.08		49		1.464		1.529
08:10	2.8		125		1.3		1.41		1.08		51		1.49		1.537
08:12	2.8		125		1.29		1.41		1.09		51		1.581		1.628
08:14	2.6		125		1.22		1.34		1.1		50		1.664		1.733
08:16	2.7		126		1.24		1.4		1.13		52		1.653		1.774
08:18	2.6		126		1.19		1.32		1.11		48		1.681		1.734
08:20	2.4		125		1.13		1.27		1.12		46		1.768		1.768
08:22	2.5		125		1.17		1.31		1.12		48		1.714		1.778
08:25	2.7		125		1.25		1.39		1.11		50		1.793		1.8
08:27	2.6		125		1.2		1.33		1.1		47		1.652		1.712
08:29	2.6		125		1.2		1.31		1.1		46		1.806		1.831
08:31	2.6		125		1.22		1.32		1.08		46		1.68		1.726
08:33	2.6		125		1.21		1.32		1.09		46		1.614		1.733
08:35	2.8		125		1.3		1.4		1.08		48		1.66		1.712
08:38	2.8		125		1.3		1.4		1.07		48		1.692		1.705
08:40	2.6		125		1.23		1.32		1.07		45		1.651		1.726
08:42	2.6		125		1.22		1.3		1.07		47		1.527		1.602
08:43	2.9		125		1.33		1.41		1.07		52		1.479		1.491
08:45	2.9		125		1.35		1.45		1.07		51		1.642		1.742
08:47	2.8		125		1.31		1.41		1.08		51		1.737		1.783
08:50	2.8		125		1.31		1.41		1.08		49		1.763		1.721
08:53	2.5		125		1.16		1.26		1.09		41		1.986		2.017
08:55	2.6		125		1.22		1.31		1.07		45		1.651		1.844
08:57	2.8		125		1.31		1.41		1.08		49		1.666		1.734
08:59	2.9		125		1.36		1.46		1.07		52		1.633		1.555
09:01	2.9		126		1.36		1.46		1.08		54		1.782		1.904
09:02	2.9		126		1.36		1.47		1.08		55		1.705		1.719
09:04	2.9		126		1.36		1.49		1.1		56		1.78		1.767
09:06	2.9		126		1.34		1.5		1.11		57		1.755		1.919
09:08	2.7		126		1.27		1.41		1.12		51		1.658		1.652
09:11	2.5		126		1.14		1.28		1.12		45		1.796		1.881
09:13	2.8		126		1.29		1.44		1.12		50		1.876		1.97
09:15	2.7		126		1.24		1.38		1.11		49		1.791		1.842
09:17	2.8		126		1.29		1.43		1.11		48		1.873		1.887
09:20	2.8		126		1.28		1.42		1.11		49		1.865		2.018
09:22	2.8		126		1.32		1.46		1.1		48		1.958		1.901
09:24	2.4		127		1.12		1.25		1.11		44		1.753		2.014
09:27	2.6		127		1.19		1.31		1.1		44		1.62		1.638
09:29	2.8		127		1.29		1.41		1.09		48		1.747		1.838
09:31	2.8		127		1.29		1.39		1.08		48		1.676		1.746
09:34	1.9		127		0.9		0.98		1.09		35		1.864		1.916
09:36	3.7		127		1.72		1.81		1.05		56		1.812		1.751
09:38	3.3		127		1.54		1.63		1.06		52		1.764		1.838
09:40	3.2		127		1.47		1.57		1.07		55		1.789		1.86
09:42	3		127		1.38		1.5		1.08		54		1.706		1.79
09:44	2.8		127		1.32		1.46		1.11		53		1.933		1.993
09:46	2.7		129		1.26		1.4		1.12		51		1.931		2.001
09:49	2.7		129		1.27		1.41		1.12		49		1.823		1.906
09:51	2.8		129		1.28		1.43		1.12		52		1.859		1.997
09:53	3		129		1.38		1.53		1.11		54		1.795		1.756
09:55	2.9		129		1.35		1.51		1.12		56		1.895		1.926
09:57	2.8		129		1.31		1.47		1.12		54		1.84		1.884
09:59	2.7		129		1.27		1.43		1.13		51		1.782		1.861
10:01	2.8		129		1.29		1.45		1.13		52		1.803		1.911
10:04	2.6		129		1.22		1.37		1.12		43		2.144		1.984
10:07	2.4		129		1.12		1.26		1.12		43		1.795		2.104
10:10	2.4		129		1.12		1.25		1.12		41		2.349		2.299
10:12	3.2		129		1.48		1.57		1.06		51		1.668		1.803
10:14	3.2		129		1.49		1.58		1.06		55		1.804		1.816
10:16	3		129		1.41		1.52		1.08		54		1.675		1.786
10:18	3		129		1.38		1.5		1.08		53		1.721		1.789
10:20	2.9		129		1.35		1.49		1.11		55		1.741		1.937
10:22	3.1		129		1.45		1.62		1.12		60		1.802		1.836
10:23	2.9		129		1.37		1.52		1.12		57		1.786		1.77
10:26	2.7		129		1.28		1.44		1.13		52		1.823		1.871
10:27	2.8		129		1.29		1.46		1.13		53		1.729		1.829
10:29	2.7		129		1.26		1.45		1.15		53		1.79		1.868
10:32	2.4		129		1.11		1.27		1.14		42		1.857		1.931
10:34	2.8		130		1.3		1.47		1.13		50		1.826		1.836
10:37	2.7		130		1.25		1.41		1.12		49		1.775		1.94
10:39	2.8		130		1.31		1.48		1.13		52		1.742		1.828
10:40	2.8		130		1.32		1.49		1.13		54		1.755		1.748
10:42	3		130		1.37		1.57		1.14		58		1.722		1.862
10:44	2.7		130		1.27		1.45		1.14		53		1.812		1.771
10:46	2.8		130		1.31		1.49		1.13		56		1.944		1.908
10:48	2.7		130		1.27		1.45		1.14		56		1.777		1.988
10:50	2.9		130		1.32		1.5		1.13		55		1.685		1.646
10:52	2.9		130		1.32		1.52		1.15		55		1.757		1.972
10:54	3		130		1.4		1.6		1.14		57		1.767		1.715
10:56	3		130		1.39		1.56		1.12		55		1.849		1.892
10:58	2.9		130		1.32		1.5		1.13		54		1.725		1.832
11:00	2.9		130		1.35		1.51		1.12		53		1.763		1.768
11:02	2.7		130		1.23		1.39		1.12		48		1.767		1.97
11:04	2.8		130		1.32		1.48		1.12		53		1.808		1.868
11:06	3.1		130		1.42		1.59		1.12		58		1.728		1.804
11:08	2.7		130		1.25		1.41		1.12		49		1.757		1.874
11:10	2.9		130		1.33		1.49		1.12		53		1.81		1.894
11:12	2.8		130		1.31		1.47		1.12		54		1.655		1.699
11:14	2.8		130		1.3		1.47		1.13		53		1.734		1.807
11:16	2.8		130		1.3		1.45		1.12		49		1.927		1.911
11:18	2.6		130		1.21		1.39		1.15		50		1.86		2.265
11:20	3		131		1.39		1.56		1.13		56		1.82		1.741
11:22	3.1		131		1.44		1.64		1.14		60		1.778		1.878
11:24	3		131		1.38		1.57		1.14		60		1.664		1.66
11:25	3.1		130		1.44		1.65		1.15		64		1.706		1.653
11:27	2.7		130		1.26		1.44		1.14		52		1.747		1.909
11:30	2.8		130		1.28		1.48		1.15		54		1.829		1.945
11:32	3		130		1.41		1.63		1.15		56		2.122		2.067
11:34	2.7		130		1.24		1.42		1.15		52		1.741		1.985
11:36	2.9		130		1.33		1.51		1.14		57		1.771		1.804
11:37	3		130		1.39		1.59		1.14		59		1.712		1.771
11:39	2.9		131		1.36		1.55		1.14		60		1.768		1.818
11:41	3		131		1.4		1.62		1.16		62		1.797		1.935
11:43	3		131		1.37		1.59		1.16		61		1.844		1.889
11:45	2.9		131		1.33		1.53		1.15		55		1.92		1.894
11:47	2.7		131		1.26		1.45		1.15		53		1.863		2.037
11:49	3		131		1.41		1.62		1.15		61		1.783		1.791
11:51	2.9		130		1.33		1.52		1.14		56		1.76		1.786
11:52	3		130		1.37		1.56		1.14		60		1.825		1.953
11:55	2.3		130		1.09		1.25		1.14		45		1.797		1.958
11:56	3.5		130		1.6		1.82		1.13		68		1.913		1.755
11:58	3.2		130		1.5		1.71		1.14		65		1.913		1.967
12:00	3		130		1.4		1.61		1.14		61		1.8		1.908
12:02	3		130		1.39		1.58		1.14		58		1.88		1.787
12:04	2.9		123		1.33		1.54		1.15		58		1.831		2.072
12:06	3.1		123		1.43		1.64		1.15		61		1.856		1.87
12:07	3		123		1.4		1.6		1.14		60		1.834		1.916
12:09	2.9		131		1.36		1.55		1.14		59		1.758		1.803
12:11	2.8		131		1.31		1.49		1.13		54		1.6		1.642
12:13	3.1		131		1.45		1.65		1.13		59		2.032		2.023
12:16	2.8		133		1.31		1.49		1.14		50		2.076		2.2
12:18	2.7		133		1.27		1.46		1.14		54		1.818		2.124
12:19	3.1		133		1.45		1.66		1.14		61		1.854		1.826
12:21	3.1		133		1.43		1.62		1.13		59		1.822		1.941
12:23	3.1		133		1.44		1.64		1.14		61		1.84		1.936
12:25	3.1		133		1.43		1.62		1.13		58		1.859		1.836
12:27	2.9		133		1.34		1.54		1.15		56		1.884		2.054
12:29	3.1		134		1.43		1.64		1.15		58		2.203		2.219
12:31	3		134		1.37		1.55		1.13		58		1.528		1.605
12:33	3.1		134		1.44		1.61		1.12		59		1.729		1.787
12:34	2.9		134		1.36		1.54		1.13		58		1.761		1.785
12:37	2.8		134		1.3		1.49		1.15		52		1.9		2.055
12:39	3.1		134		1.43		1.61		1.13		57		1.868		1.931
12:40	3		136		1.38		1.57		1.13		61		1.586		1.748
12:42	3.2		136		1.47		1.65		1.13		60		1.783		1.831
12:44	3.1		136		1.44		1.61		1.12		57		1.722		1.839
12:46	3.2		136		1.49		1.68		1.13		62		1.859		1.922
12:48	2.8		136		1.32		1.5		1.14		52		1.881		2.043
12:50	3.2		136		1.5		1.69		1.13		61		1.788		1.886
12:51	3		136		1.41		1.59		1.13		58		1.639		1.699
12:53	3.2		136		1.48		1.69		1.14		61		1.846		1.872
12:55	3.1		136		1.43		1.64		1.14		61		1.781		1.932
12:57	3.2		136		1.49		1.68		1.13		61		1.807		1.82
12:59	2.8		136		1.31		1.5		1.14		53		1.836		2.062
13:01	3		136		1.39		1.58		1.13		57		1.909		1.979
13:02	3.3		136		1.51		1.72		1.13		63		1.765		1.838
13:04	3.3		136		1.53		1.74		1.14		65		1.783		1.852
13:06	3		136		1.39		1.59		1.14		60		1.549		1.609
13:07	3.4		136		1.57		1.79		1.14		65		1.871		1.849
13:09	3.2		136		1.47		1.68		1.14		62		1.847		2.006
13:11	3.3		136		1.53		1.75		1.14		63		2.097		2.163
13:13	3.2		136		1.5		1.72		1.14		64		1.927		1.921
13:15	3.2		137		1.48		1.7		1.15		62		1.816		1.94
13:16	3.2		137		1.5		1.74		1.16		65		1.894		2.024
13:18	3.1		137		1.45		1.68		1.16		63		1.687		1.865
13:20	3.3		137		1.51		1.75		1.16		66		1.773		1.831
13:21	3.3		137		1.53		1.79		1.17		68		1.863		1.832
13:23	3.1		137		1.44		1.68		1.16		64		1.719		1.908
13:25	3.2		137		1.48		1.74		1.17		65		1.864		1.909
13:26	2.9		137		1.37		1.6		1.17		59		1.838		1.959
13:28	3.1		137		1.43		1.68		1.17		62		1.769		1.863
13:30	3.1		137		1.42		1.65		1.16		61		1.76		1.794
13:31	3.1		137		1.43		1.67		1.17		63		1.689		1.863
13:33	3.1		137		1.42		1.66		1.17		60		1.805		1.925
13:35	3.1		137		1.42		1.65		1.16		62		1.65		1.727
13:37	3.4		137		1.56		1.81		1.16		65		1.863		1.881
13:39	2.8		137		1.31		1.53		1.17		53		1.905		2.032
13:41	2.8		139		1.31		1.52		1.16		53		1.877		2.02
13:42	3.6		139		1.66		1.91		1.15		72		1.936		1.972
13:44	3.3		139		1.53		1.77		1.16		71		1.731		2.031
13:46	2.8		139		1.3		1.51		1.17		48		1.863		1.931
13:48	3.7		139		1.7		1.98		1.16		73		1.913		1.994
13:49	3.6		139		1.68		1.95		1.16		75		1.901		1.949
13:51	3.4		139		1.58		1.86		1.17		71		1.789		1.938
13:52	3.4		139		1.58		1.87		1.18		73		1.809		1.862
13:54	3.3		139		1.53		1.83		1.19		72		1.688		1.804
13:55	3.2		139		1.47		1.74		1.19		70		1.746		1.861
13:57	3.5		139		1.64		1.93		1.18		70		2.219		2.058
13:59	3.1		139		1.42		1.69		1.18		63		1.997		2.349
14:01	3.2		139		1.51		1.78		1.18		65		1.958		2.04
14:03	3.1		139		1.43		1.68		1.18		59		1.96		2.048
14:05	2.8		139		1.32		1.53		1.16		54		1.711		1.837
14:06	3.6		139		1.68		1.96		1.17		74		1.808		1.892
14:08	3.5		139		1.64		1.9		1.16		69		2.058		1.922
14:10	3.1		139		1.45		1.71		1.18		61		2.034		2.226
14:12	3.1		139		1.44		1.68		1.17		63		1.822		2.032
14:14	2.7		139		1.24		1.44		1.17		49		1.671		1.903
14:15	3.7		139		1.73		2		1.16		74		1.836		1.742
14:17	3.4		139		1.57		1.84		1.17		70		1.724		1.824
14:18	3.4		139		1.57		1.84		1.17		71		1.762		1.891
14:20	3.4		139		1.57		1.85		1.18		72		1.785		1.793
14:21	3.1		139		1.46		1.72		1.18		69		1.543		1.737
14:22	3.2		139		1.48		1.76		1.19		71		1.729		1.875
14:24	3.3		139		1.51		1.8		1.19		72		1.741		1.783
14:25	3.2		139		1.5		1.78		1.19		72		1.725		1.903
14:27	3		139		1.39		1.67		1.2		64		1.669		1.797
14:29	3.1		139		1.43		1.7		1.19		67		1.796		1.866
14:30	3.1		141		1.43		1.72		1.2		68		1.753		1.843
14:32	3		141		1.41		1.7		1.2		69		1.68		1.786
14:33	3.2		141		1.51		1.8		1.2		65		1.92		1.986
14:35	3		141		1.39		1.67		1.2		65		1.917		1.971
14:38	2.1		141		0.97		1.16		1.2		40		1.607		1.93
14:39	3.7		134		1.72		2.03		1.18		75		1.743		1.616
14:41	3.4		134		1.56		1.84		1.18		68		1.866		1.827
14:42	3.2		134		1.5		1.76		1.17		67		1.81		2.028
14:44	2.7		141		1.27		1.49		1.17		55		1.477		1.713
14:45	3.4		141		1.56		1.81		1.17		73		1.658		1.697
14:47	3		141		1.38		1.62		1.17		62		1.547		1.696
14:49	2.4		141		1.1		1.27		1.15		44		1.352		1.569
14:50	3.5		141		1.61		1.85		1.15		64		2.06		2.006
14:52	3.2		141		1.48		1.7		1.15		64		1.591		1.81
14:53	3.2		141		1.49		1.73		1.16		70		1.541		1.726
14:55	2.7		141		1.27		1.46		1.15		53		1.799		1.802
14:57	3.3		141		1.54		1.77		1.15		69		1.574		1.769
14:57	Recovery
14:58	3.5		141		1.61		1.84		1.15		73		1.734		1.719
15:00	3.1		141		1.42		1.63		1.15		67		1.641		1.783
15:01	3		141		1.41		1.63		1.15		66		1.615		1.673
15:03	3.1		141		1.43		1.65		1.15		67		1.639		1.753
15:04	2.9		139		1.32		1.57		1.18		66		1.65		1.816
15:05	2.9		139		1.34		1.6		1.2		68		1.678		1.887
15:07	2.8		139		1.31		1.58		1.2		64		1.618		1.788
15:09	3.2		139		1.5		1.79		1.19		72		1.829		1.906
15:10	3		131		1.37		1.65		1.2		63		1.722		1.866
15:12	3		131		1.38		1.66		1.2		65		1.723		1.854
15:13	2.9		131		1.36		1.62		1.19		66		1.644		1.752
15:15	3.1		139		1.45		1.72		1.19		68		1.759		1.874
15:16	2.7		139		1.25		1.52		1.21		61		1.596		1.868
15:18	2.7		139		1.25		1.52		1.21		61		1.535		1.71
15:19	2.9		131		1.36		1.63		1.2		65		1.64		1.698
15:21	2.9		131		1.33		1.61		1.21		65		1.637		1.756
15:22	2.7		131		1.25		1.53		1.22		62		1.614		1.721
15:24	2.6		131		1.2		1.46		1.21		58		1.576		1.74
15:26	2.3		137		1.07		1.3		1.21		49		1.638		1.711
15:28	3.5		137		1.64		1.97		1.2		73		1.919		1.841
15:29	3		136		1.39		1.69		1.22		68		1.775		1.885
15:31	3.1		136		1.42		1.74		1.22		66		1.807		1.83
15:32	3		136		1.4		1.74		1.24		72		1.695		1.873
15:34	2.9		129		1.34		1.7		1.27		68		1.761		1.808
15:35	2.7		129		1.25		1.57		1.26		64		1.677		1.741
15:37	2.7		129		1.24		1.58		1.27		64		1.639		1.737
15:39	2.7		129		1.26		1.62		1.29		66		1.731		1.842
15:41	2.1		133		0.98		1.26		1.29		48		1.89		1.722
15:43	2		133		0.91		1.17		1.28		44		1.506		1.904
15:45	2.8		131		1.29		1.67		1.29		66		1.687		1.77
15:47	2.5		131		1.15		1.5		1.3		55		1.88		1.876
15:48	3		131		1.39		1.82		1.31		71		1.939		2.055
15:50	2.5		130		1.18		1.57		1.33		62		1.784		1.867
15:51	2.7		130		1.26		1.68		1.34		68		1.766		1.829
15:54	1.8		129		0.84		1.08		1.28		39		1.927		1.326
15:56	0.8		129		0.39		0.47		1.21		26		0.501		0.713
15:57	2.5		129		1.17		1.5		1.28		64		1.58		1.985
15:59	2.5		127		1.15		1.52		1.33		65		1.769		1.971
16:00	2.7		127		1.25		1.71		1.36		72		1.806		1.747
16:02	2		127		0.93		1.29		1.39		60		1.473		1.852
16:03	2		127		0.93		1.32		1.42		63		1.331		1.339
16:04	2.3		127		1.05		1.51		1.43		68		1.593		1.615
16:06	2		127		0.94		1.37		1.45		60		1.497		1.409
16:07	1.9		127		0.89		1.3		1.46		61		1.425		1.541
16:09	1.8		127		0.85		1.25		1.48		56		1.605		1.553
16:10	1.9		127		0.89		1.31		1.48		60		1.39		1.538
16:12	2.1		127		0.97		1.46		1.5		66		1.665		1.685
16:14	2		127		0.94		1.39		1.48		61		1.798		1.69
16:15	1.8		126		0.85		1.3		1.52		60		1.673		2.002
16:17	1.6		126		0.73		1.12		1.53		52		1.501		1.68
16:19	1.9		126		0.89		1.33		1.5		58		1.649		1.601
16:21	1.9		125		0.88		1.33		1.51		57		1.66		1.67
16:23	1.9		125		0.9		1.35		1.51		54		1.887		1.811
16:25	1.8		123		0.83		1.25		1.5		49		2.088		2.157
16:27	1.9		123		0.9		1.36		1.51		56		1.869		2.021
16:29	1.9		122		0.87		1.31		1.51		51		1.954		2.045
16:32	1.9		122		0.89		1.33		1.5		54		1.886		2.008
16:33	1.9		122		0.86		1.28		1.49		53		1.691		1.716
16:36	1.8		121		0.85		1.28		1.51		52		2.041		2.152
16:38	1.6		121		0.76		1.16		1.53		50		1.771		1.995
16:41	1.5		120		0.71		1.07		1.51		40		2.091		2.031
16:44	1.5		120		0.71		1.04		1.48		39		1.901		2.099
16:46	1.8		120		0.81		1.19		1.46		46		1.876		1.912
16:50	1.6		117		0.72		1.01		1.4		36		1.898		1.628
16:52	1.8		117		0.85		1.21		1.42		47		1.931		2.118
16:54	1.8		117		0.84		1.19		1.43		50		1.804		1.865
16:57	1.8		117		0.82		1.18		1.43		48		1.852		2.005
16:59	1.6		116		0.74		1.08		1.45		47		1.753		1.823
17:01	1.4		116		0.64		0.92		1.45		42		1.469		1.589
17:17			114
17:31			114
17:47			112
18:03			109
18:19			110
18:34			109
18:50			106
19:06			106
	2.65346	0.247996	124.911	130.344	1.23196	0.0530636	1.38038	0.0909046	1.11916	0.0186431	51.4726	140.503	1.68219	0.0609543	1.74854	0.0710837
	2.64714	0.264168	124.911	130.344	1.22902	0.0565506	1.3771	0.0952245	1.11729	0.0200814	51.3524	146.234	1.65121	0.110317	1.71612	0.124992
	METS						HR						VO2						VCO2						RER						VE						Vtex						Vtin						LABEL
	Rest		Test		Recovery		Rest		Test		Recovery		Rest		Test		Recovery		Rest		Test		Recovery		Rest		Test		Recovery		Rest		Test		Recovery		Rest		Test		Recovery		Rest		Test		Recovery
	MEDIA	VAR	MEDIA	VAR	MEDIA	VAR	MEDIA	VAR	MEDIA	VAR	MEDIA	VAR	MEDIA	VAR	MEDIA	VAR	MEDIA	VAR	MEDIA	VAR	MEDIA	VAR	MEDIA	VAR	MEDIA	VAR	MEDIA	VAR	MEDIA	VAR	MEDIA	VAR	MEDIA	VAR	MEDIA	VAR	MEDIA	VAR	MEDIA	VAR	MEDIA	VAR	MEDIA	VAR	MEDIA	VAR	MEDIA	VAR	BIN
	1.83333	0.442424	2.71514	0.205701	2.34058	0.3498	100.083	0.628788	124.457	141.126	126.974	77.2888	0.848333	0.0937424	1.26069	0.0440757	1.08623	0.0741768	0.785	0.0497727	1.37091	0.0952662	1.42841	0.0670548	0.948333	0.00541515	1.07571	0.00757413	1.33957	0.0167189	31.3333	95.1515	50.0686	136.379	58.5942	102.127	1.63075	0.301335	1.67797	0.0637071	1.70361	0.0471648	1.67475	0.317553	1.74084	0.0754786	1.78764	0.0477159	0
[truncated: 1 more columns]
