# Supplementary material for: On the development of diagnostic support algorithms based on CPET biosignals data via machine learning and wavelets
Source: PeerJ journal article supplement (doi:10.7717/peerj-cs.2474), 2025-01-30
Supplement: raw_data.zip [file Subject04_BxB.xlsx]

## Sheet: Demographics
Gender:	Male
Age:	57
Height (cm):	180
Weight (kg):	118.9
BMI:	37
Condition:	HFrEf

## Sheet: Subject04_BxB
Time	METS		HR		V'O2		V'CO2		RER		V'E		VTex		VTin
min			1/min		L/min		L/min				L/min		L		L
00:00	Rest
00:03	1.3				0.56		0.5		0.9		19		0.91
00:06	1.7		101		0.7		0.65		0.92		25		1.419		2.197
00:13	1.1		101		0.46		0.43		0.94		16		1.65		2.065
00:17	1.6		100		0.67		0.65		0.97		25		1.659		1.545
00:20	1.3		100		0.55		0.52		0.95		21		1.137		1.057
00:23	1.1		100		0.45		0.42		0.93		18		0.927		0.866
00:23	Test
00:28	0.7		100		0.3		0.27		0.9		11		0.983		0.952
00:33	0.4		100		0.18		0.13		0.75		6		0.457		0.689
00:36	2.1		100		0.86		0.66		0.77		22		1.198		1.104
00:38	1.9		100		0.78		0.58		0.74		22		0.787		0.896
00:40	2.7		101		1.12		0.85		0.76		31		1.207		1.207
00:43	2.7		101		1.12		0.87		0.78		32		1.212		1.281
00:45	2.4		102		1		0.78		0.78		30		0.939		0.947
00:47	2.3		102		0.96		0.77		0.8		29		1.148		1.048
00:49	2.3		102		0.98		0.8		0.82		31		1.154		1.159
00:51	2.2		103		0.93		0.77		0.83		30		1.144		1.104
00:54	2		103		0.85		0.73		0.85		30		1.174		1.208
00:56	2.3		104		0.97		0.85		0.88		32		1.309		1.34
00:59	2.1		105		0.85		0.77		0.9		28		1.392		1.424
01:01	2.1		105		0.88		0.78		0.88		30		1.117		1.131
01:05	1.6		105		0.67		0.59		0.87		21		1.36		1.117
01:08	2.1		105		0.86		0.68		0.8		25		1.042		1.208
01:10	2.3		106		0.97		0.76		0.79		28		1.146		1.174
01:13	2.2		106		0.92		0.71		0.78		26		1.203		1.155
01:15	2.5		106		1.04		0.78		0.75		29		1.124		1.171
01:19	2.5		106		1.04		0.81		0.78		27		1.528		1.571
01:21	2		106		0.82		0.6		0.73		22		0.861		0.876
01:23	2.2		106		0.92		0.66		0.72		24		0.889		0.992
01:26	2.9		106		1.22		0.9		0.74		31		1.336		1.409
01:28	2.6		106		1.06		0.77		0.72		28		1.047		1.026
01:30	2.8		107		1.16		0.85		0.73		31		1.147		1.162
01:33	3.1		107		1.31		0.97		0.74		35		1.325		1.338
01:35	3		106		1.25		0.95		0.76		35		1.41		1.386
01:37	2.4		106		1.02		0.77		0.76		29		1.096		1.131
01:40	2.8		107		1.16		0.89		0.77		32		1.261		1.288
01:42	2.7		107		1.13		0.86		0.76		32		1.187		1.185
01:44	2.7		107		1.11		0.83		0.75		31		1.121		1.08
01:46	2.9		107		1.21		0.91		0.76		32		1.21		1.201
01:49	3.1		107		1.28		0.97		0.76		35		1.337		1.324
01:51	2.9		108		1.21		0.92		0.76		33		1.233		1.225
01:53	3		108		1.25		0.95		0.76		34		1.335		1.291
01:55	2.8		108		1.15		0.87		0.76		32		1.173		1.225
01:58	2.9		108		1.2		0.91		0.76		32		1.273		1.223
02:00	3		109		1.26		0.95		0.75		34		1.17		1.255
02:02	3.2		109		1.34		1.02		0.76		36		1.284		1.307
02:04	3		109		1.23		0.95		0.77		34		1.2		1.203
02:06	3.2		109		1.33		1.05		0.79		38		1.449		1.467
02:09	2.8		109		1.15		0.91		0.79		33		1.259		1.298
02:11	2.6		109		1.1		0.86		0.78		32		1.162		1.211
02:13	2.4		109		0.99		0.75		0.76		27		0.914		0.919
02:15	2.7		109		1.12		0.84		0.75		29		1.01		1.089
02:17	2.9		109		1.21		0.89		0.74		32		0.979		1.07
02:19	3.4		109		1.4		1.06		0.76		37		1.375		1.24
02:21	2.5		109		1.04		0.77		0.74		27		1.002		0.988
02:24	2.9		109		1.19		0.89		0.75		30		1.188		1.285
02:26	3.2		110		1.34		1		0.74		35		1.243		1.257
02:28	3.4		110		1.39		1.05		0.75		37		1.225		1.251
02:31	3.4		110		1.42		1.16		0.81		39		2.137		2.193
02:33	2.9		110		1.21		0.95		0.79		37		1.104		1.248
02:35	3.1		110		1.27		1.03		0.81		39		1.341		1.247
02:37	2.9		110		1.19		0.96		0.81		36		1.311		1.31
02:40	2.7		110		1.13		0.91		0.81		33		1.356		1.297
02:42	2.4		110		1.02		0.8		0.79		27		1.167		1.274
02:44	2.6		111		1.09		0.82		0.75		28		1.024		1.021
02:47	3.1		111		1.28		0.97		0.76		32		1.272		1.306
02:49	3.3		111		1.37		1.04		0.76		35		1.383		1.344
02:52	3		111		1.23		0.95		0.77		32		1.334		1.339
02:54	3.1		111		1.28		0.98		0.76		34		1.251		1.32
02:56	3		111		1.24		0.96		0.77		32		1.269		1.364
02:58	3.3		111		1.36		1.05		0.77		36		1.227		1.202
03:00	3.2		111		1.32		1.03		0.78		35		1.268		1.289
03:02	3.3		111		1.36		1.07		0.78		37		1.314		1.307
03:05	3.3		112		1.36		1.08		0.79		37		1.373		1.427
03:07	3.1		112		1.3		1.03		0.8		36		1.303		1.31
03:09	3.1		112		1.28		1.02		0.8		36		1.354		1.338
03:11	2.9		112		1.19		0.94		0.79		33		1.208		1.242
03:14	3		112		1.25		0.99		0.79		34		1.443		1.382
03:16	2.6		112		1.1		0.84		0.77		27		1.059		1.149
03:18	2.8		112		1.16		0.87		0.75		29		0.985		1.068
03:20	3		112		1.23		0.92		0.75		29		0.978		1.008
03:23	3.4		112		1.42		1.07		0.76		35		1.296		1.32
03:25	3.2		112		1.33		1		0.76		34		1.153		1.244
03:27	3.3		112		1.36		1.05		0.77		34		1.379		1.348
03:29	3.6		112		1.51		1.18		0.78		41		1.331		1.408
03:31	3.4		112		1.4		1.12		0.8		38		1.368		1.34
03:33	3		112		1.27		1.02		0.8		35		1.265		1.345
03:36	3.3		112		1.39		1.13		0.82		38		1.463		1.443
03:38	3		112		1.26		1.04		0.82		35		1.434		1.481
03:40	3.3		112		1.38		1.13		0.82		39		1.369		1.409
03:42	3.3		112		1.38		1.13		0.82		37		1.383		1.388
03:45	3.2		113		1.32		1.08		0.82		37		1.346		1.385
03:47	3.4		113		1.42		1.17		0.83		39		1.454		1.475
03:49	3.3		113		1.38		1.15		0.83		38		1.486		1.447
03:52	3.2		113		1.32		1.11		0.84		37		1.482		1.605
03:54	3.3		113		1.39		1.16		0.83		39		1.395		1.331
03:56	3		113		1.23		1.02		0.83		34		1.287		1.31
03:58	3		113		1.25		1.03		0.83		34		1.326		1.338
04:00	3.1		113		1.29		1.05		0.81		34		1.192		1.216
04:03	3.4		113		1.41		1.14		0.81		37		1.393		1.435
04:05	3.4		113		1.42		1.18		0.83		38		1.543		1.552
04:07	3		113		1.26		1.01		0.8		35		1.067		1.134
04:09	3.1		113		1.29		1.04		0.8		36		1.091		1.135
04:10	3.1		113		1.31		1.04		0.8		35		1.083		1.111
04:13	3.6		113		1.49		1.2		0.81		41		1.468		1.444
04:15	3.5		113		1.44		1.18		0.82		39		1.44		1.492
04:18	3.6		113		1.49		1.28		0.86		42		2.063		2.078
04:20	3.3		113		1.39		1.18		0.85		41		1.48		1.532
04:22	3.7		113		1.52		1.31		0.86		46		1.444		1.528
04:24	3.4		113		1.4		1.21		0.87		43		1.386		1.33
04:26	3.3		113		1.39		1.2		0.86		42		1.488		1.475
04:28	3.1		113		1.28		1.1		0.86		39		1.256		1.338
04:30	3.4		114		1.43		1.23		0.86		45		1.358		1.406
04:32	3.1		114		1.29		1.13		0.88		41		1.376		1.334
04:34	3.2		114		1.34		1.17		0.88		42		1.438		1.498
04:36	3.3		114		1.39		1.22		0.87		44		1.429		1.464
04:38	3.4		114		1.41		1.24		0.88		44		1.397		1.472
04:39	3.1		114		1.28		1.12		0.88		39		1.245		1.199
04:42	3.2		114		1.31		1.15		0.87		38		1.464		1.504
04:44	2.8		114		1.17		1		0.85		32		1.194		1.295
04:46	3.1		114		1.27		1.07		0.84		34		1.358		1.456
04:49	3.3		114		1.38		1.15		0.83		37		1.275		1.317
04:50	3.5		114		1.46		1.21		0.83		40		1.324		1.33
04:52	3.7		114		1.53		1.27		0.84		43		1.415		1.462
04:55	3.5		114		1.45		1.24		0.86		40		1.607		1.573
04:57	3.1		114		1.27		1.08		0.85		35		1.274		1.392
04:59	3.2		114		1.31		1.1		0.83		36		1.212		1.213
05:01	3.3		114		1.38		1.14		0.83		37		1.192		1.223
05:03	3.2		114		1.35		1.11		0.82		36		1.192		1.259
05:05	3.6		114		1.5		1.25		0.83		41		1.306		1.34
05:07	3.7		114		1.55		1.3		0.84		43		1.333		1.335
05:08	3.7		114		1.53		1.3		0.85		45		1.357		1.448
05:10	3.3		115		1.38		1.17		0.85		42		1.174		1.228
05:12	3.5		115		1.45		1.25		0.86		41		1.331		1.216
05:14	3.5		115		1.44		1.24		0.86		41		1.464		1.511
05:17	3.8		115		1.59		1.4		0.89		46		1.765		1.826
05:19	3.8		115		1.57		1.4		0.89		47		1.572		1.592
05:21	3.5		115		1.47		1.33		0.9		45		1.518		1.53
05:23	3.3		115		1.36		1.22		0.9		42		1.442		1.453
05:25	3.4		115		1.41		1.25		0.89		43		1.427		1.474
05:27	3.7		115		1.54		1.39		0.9		46		1.541		1.581
05:29	3.4		115		1.4		1.24		0.89		41		1.33		1.289
05:31	3.5		116		1.47		1.3		0.89		43		1.618		1.648
05:33	3.3		116		1.38		1.21		0.88		39		1.408		1.466
05:35	3.1		116		1.3		1.11		0.86		36		1.174		1.186
05:37	3.3		116		1.37		1.16		0.85		39		1.141		1.239
05:39	3.4		116		1.41		1.2		0.85		38		1.277		1.229
05:41	3.4		116		1.4		1.19		0.85		37		1.444		1.567
05:43	3.7		116		1.53		1.3		0.85		40		1.437		1.454
05:45	3.5		116		1.48		1.26		0.85		40		1.363		1.391
05:49	3.6		116		1.5		1.35		0.9		41		2.349		2.387
05:51	3.7		116		1.52		1.31		0.86		43		1.419		1.477
05:53	3.6		116		1.51		1.3		0.86		42		1.363		1.366
05:55	3.7		116		1.54		1.33		0.86		44		1.451		1.492
05:57	3.8		116		1.6		1.39		0.87		45		1.407		1.506
05:58	3.9		116		1.63		1.43		0.88		47		1.456		1.468
06:00	3.6		116		1.5		1.33		0.89		43		1.474		1.447
06:02	3.6		116		1.48		1.31		0.88		44		1.419		1.46
06:04	3.7		116		1.52		1.35		0.89		44		1.524		1.504
06:06	3.8		116		1.57		1.42		0.9		46		1.506		1.615
06:08	3.8		116		1.6		1.45		0.91		49		1.595		1.648
06:10	3.8		116		1.57		1.44		0.91		48		1.531		1.502
06:12	3.6		116		1.5		1.39		0.93		46		1.495		1.62
06:14	3.4		116		1.41		1.29		0.92		45		1.285		1.321
06:16	3.7		117		1.53		1.41		0.92		46		1.498		1.464
06:18	3.7		117		1.53		1.4		0.91		47		1.44		1.531
06:20	3.4		117		1.41		1.3		0.92		43		1.73		1.591
06:22	3.5		117		1.44		1.32		0.92		43		1.485		1.677
06:24	3.5		117		1.45		1.31		0.9		42		1.387		1.392
06:26	3.7		117		1.52		1.36		0.89		45		1.398		1.387
06:28	3.7		117		1.52		1.36		0.89		46		1.373		1.5
06:29	3.9		118		1.64		1.47		0.9		49		1.381		1.392
06:31	4		118		1.65		1.5		0.91		52		1.435		1.543
06:33	3.7		118		1.54		1.43		0.93		50		1.444		1.408
06:35	3.6		117		1.5		1.38		0.92		47		1.453		1.43
06:37	3.8		117		1.57		1.44		0.92		48		1.496		1.566
06:39	3.6		117		1.51		1.41		0.93		47		1.667		1.669
06:41	3.7		117		1.53		1.42		0.93		47		1.596		1.633
06:43	3.8		117		1.58		1.47		0.93		49		1.556		1.683
06:44	3.6		117		1.48		1.38		0.93		47		1.496		1.501
06:46	3.3		117		1.39		1.29		0.93		43		1.401		1.496
06:48	3.6		117		1.48		1.36		0.92		44		1.465		1.496
06:50	3.7		117		1.54		1.4		0.91		46		1.555		1.588
06:52	3.7		117		1.54		1.4		0.91		47		1.506		1.545
06:54	3.6		118		1.51		1.37		0.91		46		1.402		1.489
06:56	3.8		118		1.6		1.47		0.92		49		1.465		1.458
06:58	3.9		118		1.63		1.49		0.91		50		1.531		1.566
07:00	3.9		118		1.61		1.49		0.93		51		1.562		1.6
07:02	3.6		118		1.5		1.39		0.93		46		1.55		1.479
07:04	3.7		118		1.54		1.41		0.92		45		1.513		1.561
07:06	3.5		118		1.45		1.33		0.92		42		1.566		1.659
07:08	4		118		1.66		1.52		0.91		48		1.594		1.624
07:10	3.9		118		1.61		1.47		0.92		48		1.563		1.65
07:12	3.9		118		1.63		1.5		0.92		48		1.575		1.604
07:14	3.9		118		1.62		1.49		0.92		50		1.467		1.569
07:16	3.8		118		1.59		1.49		0.93		48		1.747		1.762
07:18	3.8		118		1.59		1.5		0.94		50		1.768		1.735
07:20	3.2		118		1.34		1.24		0.93		40		1.58		1.665
07:22	3.9		118		1.63		1.49		0.91		47		1.507		1.535
07:24	4		118		1.68		1.53		0.91		50		1.509		1.605
07:26	4.1		118		1.71		1.58		0.92		52		1.546		1.598
07:28	4		118		1.66		1.55		0.93		52		1.662		1.67
07:29	3.9		120		1.64		1.55		0.94		53		1.56		1.629
07:31	3.9		120		1.62		1.54		0.95		51		1.553		1.637
07:34	3.8		120		1.58		1.51		0.95		50		1.856		1.832
07:36	3.6		118		1.52		1.43		0.94		47		1.597		1.68
07:38	3.7		118		1.54		1.44		0.94		46		1.641		1.751
07:40	4		120		1.65		1.55		0.94		49		1.582		1.614
07:42	3.5		120		1.46		1.37		0.93		43		1.635		1.679
07:44	4.1		120		1.72		1.6		0.93		52		1.589		1.703
07:45	3.9		120		1.61		1.51		0.94		50		1.4		1.523
07:47	3.5		120		1.46		1.36		0.93		45		1.342		1.273
07:49	3.9		120		1.64		1.51		0.92		48		1.463		1.539
07:51	3.9		120		1.63		1.5		0.92		48		1.388		1.529
07:53	4		120		1.68		1.55		0.92		48		1.557		1.516
07:55	4.2		120		1.76		1.65		0.93		52		1.654		1.766
07:57	4.1		120		1.72		1.63		0.95		51		1.777		1.842
07:59	4.2		120		1.77		1.68		0.95		56		1.708		1.827
08:00	4.2		120		1.75		1.68		0.96		57		1.683		1.688
08:03	3.8		120		1.58		1.59		1.01		50		2.404		2.444
08:05	3.8		120		1.6		1.55		0.97		51		1.62		1.645
08:07	4.1		120		1.72		1.66		0.96		56		1.621		1.773
08:09	3.9		120		1.64		1.58		0.96		52		1.577		1.548
08:11	3.9		120		1.62		1.55		0.96		50		1.585		1.595
08:13	3.4		120		1.44		1.36		0.95		43		1.531		1.554
08:15	4		120		1.67		1.58		0.95		48		1.745		1.84
08:17	4.2		120		1.73		1.64		0.95		52		1.661		1.797
08:19	4.4		120		1.85		1.76		0.95		57		1.699		1.714
08:20	4.1		122		1.69		1.64		0.97		56		1.691		1.751
08:22	4.1		122		1.69		1.66		0.98		55		1.701		1.788
08:24	4.1		122		1.71		1.69		0.98		57		1.688		1.738
08:26	3.8		121		1.57		1.54		0.99		52		1.663		1.728
08:28	3.7		121		1.53		1.49		0.97		50		1.593		1.622
08:30	4		121		1.68		1.63		0.97		55		1.663		1.798
08:31	4.1		121		1.69		1.64		0.97		54		1.62		1.683
08:33	4.1		121		1.69		1.65		0.98		56		1.692		1.737
08:35	3.8		121		1.59		1.55		0.97		51		1.462		1.498
08:37	4		121		1.67		1.63		0.98		53		1.78		1.776
08:40	3		122		1.25		1.18		0.94		35		1.501		1.505
08:41	4.2		122		1.74		1.6		0.92		49		1.541		1.688
08:43	4.6		122		1.93		1.8		0.94		57		1.695		1.782
08:45	4.4		122		1.82		1.74		0.96		59		1.808		1.827
08:47	4		122		1.67		1.6		0.96		53		1.657		1.696
08:49	3.9		122		1.63		1.58		0.97		51		1.751		1.778
08:51	4.1		122		1.72		1.65		0.96		54		1.691		1.751
08:53	4.3		122		1.78		1.72		0.97		57		1.708		1.771
08:55	4		122		1.68		1.65		0.98		55		1.986		1.908
08:57	3.9		122		1.62		1.58		0.97		54		1.582		1.805
08:58	4.4		122		1.81		1.79		0.99		60		1.805		1.795
09:01	3.7		122		1.52		1.5		0.99		49		1.888		1.888
09:03	4.1		122		1.72		1.68		0.98		55		1.668		1.824
09:04	4.3		122		1.77		1.77		1		61		1.69		1.752
09:06	3.9		122		1.62		1.61		0.99		54		1.557		1.529
09:08	4		122		1.67		1.65		0.99		54		1.548		1.627
09:10	4		123		1.68		1.65		0.98		54		1.673		1.764
09:11	4.1		123		1.7		1.67		0.98		55		1.637		1.686
09:13	4.2		123		1.74		1.73		0.99		59		1.718		1.784
09:15	4.1		123		1.72		1.71		1		56		1.701		1.737
09:17	4		123		1.68		1.68		1		54		1.623		1.734
09:19	3.8		123		1.58		1.6		1.01		52		1.766		1.8
09:21	4.2		123		1.77		1.78		1		59		1.77		1.834
09:23	4		123		1.67		1.69		1.01		55		1.924		1.946
09:25	3.9		123		1.62		1.63		1		51		1.829		1.91
09:27	4.4		123		1.84		1.83		1		59		1.768		1.808
09:28	4.3		123		1.79		1.79		1		62		1.604		1.745
09:30	4.3		123		1.81		1.83		1.01		61		1.794		1.78
09:32	4.2		123		1.76		1.8		1.02		59		1.873		1.963
09:34	4.1		123		1.7		1.73		1.01		57		1.71		1.756
09:36	4.2		123		1.77		1.8		1.02		58		2.007		1.916
09:38	3.8		123		1.6		1.62		1.01		51		1.912		2.099
09:40	4.3		125		1.78		1.77		0.99		57		1.731		1.803
09:42	4.4		125		1.84		1.85		1.01		62		1.78		1.835
09:43	4.5		125		1.89		1.93		1.02		66		1.785		1.829
09:45	4.4		125		1.84		1.91		1.04		65		1.763		1.854
09:46	4		125		1.66		1.74		1.04		61		1.63		1.751
09:48	4.3		125		1.78		1.85		1.04		61		1.801		1.774
09:50	4.1		125		1.72		1.8		1.05		59		1.979		1.986
09:52	4		125		1.66		1.71		1.03		56		1.661		1.777
09:54	4.4		125		1.83		1.9		1.04		62		2.122		2.14
09:56	4.4		125		1.82		1.89		1.04		62		1.802		1.881
09:57	4.5		125		1.85		1.92		1.04		65		1.769		1.882
09:59	4.2		125		1.75		1.83		1.05		62		1.762		1.818
10:01	4.3		126		1.78		1.85		1.04		61		1.699		1.83
10:02	4.1		126		1.72		1.8		1.05		60		1.638		1.771
10:04	4.4		126		1.85		1.93		1.05		65		1.74		1.876
10:06	4		126		1.66		1.73		1.04		58		1.739		1.769
10:08	4.2		126		1.76		1.8		1.03		61		1.78		1.89
10:09	4.2		126		1.73		1.78		1.03		60		1.706		1.695
10:11	4.5		126		1.88		1.95		1.04		65		1.719		1.823
10:13	4.3		126		1.78		1.85		1.04		60		1.669		1.658
10:14	4.5		126		1.87		1.96		1.04		69		1.816		1.981
10:15	3.9		126		1.63		1.74		1.07		69		1.397		1.788
10:17	4.2		126		1.73		1.87		1.08		60		1.615		1.332
10:19	4.3		126		1.8		1.93		1.07		63		2.347		2.454
10:21	4.1		126		1.69		1.79		1.06		62		1.625		1.696
10:22	4.3		126		1.77		1.87		1.05		64		1.738		1.876
10:24	4.3		126		1.8		1.9		1.05		66		1.684		1.79
10:25	4.5		126		1.88		1.99		1.06		71		1.627		1.761
10:27	4.5		126		1.89		2.03		1.07		72		1.588		1.66
10:28	4.5		126		1.89		2.02		1.07		72		1.61		1.714
10:29	4.3		126		1.77		1.91		1.08		72		1.482		1.665
10:31	3.9		126		1.61		1.72		1.07		56		1.51		1.485
10:31	Recovery
10:32	3.2		126		1.32		1.35		1.02		44		1.078		0.954
10:34	4.7		126		1.95		1.97		1.01		64		1.47		1.661
10:35	4.7		126		1.95		2.01		1.03		65		1.627		1.736
10:37	4.4		126		1.84		1.89		1.03		63		1.598		1.596
10:38	4.4		126		1.82		1.86		1.02		61		1.572		1.684
10:40	4.5		127		1.87		1.88		1		62		1.663		1.764
10:42	4.2		127		1.73		1.74		1		56		1.861		2.003
10:44	3.8		127		1.57		1.54		0.98		48		1.608		1.681
10:46	4.6		126		1.9		1.85		0.97		58		1.807		1.848
10:48	4.2		126		1.76		1.71		0.97		52		1.864		1.867
10:50	4.3		126		1.78		1.74		0.98		54		1.801		2.047
10:52	4.5		126		1.87		1.84		0.98		57		1.724		1.803
10:54	4.3		126		1.81		1.78		0.98		55		1.698		1.802
10:56	4.3		125		1.8		1.8		1		55		1.854		1.904
10:57	4.5		125		1.88		1.88		1		58		1.759		1.854
10:59	4.4		125		1.82		1.83		1.01		56		1.784		1.832
11:01	4.5		125		1.86		1.87		1.01		58		1.793		1.902
11:03	4.4		125		1.85		1.86		1.01		59		1.799		1.952
11:05	4.3		123		1.8		1.83		1.02		59		1.669		1.763
11:06	4.3		123		1.79		1.83		1.03		60		1.687		1.798
11:08	4.2		123		1.74		1.79		1.03		55		1.654		1.643
11:10	3.7		123		1.54		1.55		1.01		48		1.646		1.755
11:12	3.6		123		1.5		1.46		0.98		43		1.587		1.589
11:14	4.4		122		1.84		1.81		0.98		54		1.837		1.962
11:16	4.4		122		1.84		1.8		0.98		55		1.734		1.831
11:18	4.2		122		1.74		1.73		0.99		54		1.702		1.777
11:20	4		122		1.67		1.67		1		53		1.743		1.857
11:22	4		122		1.67		1.69		1.01		55		1.744		1.843
11:24	4.1		122		1.72		1.75		1.02		58		1.734		1.817
11:26	3.8		122		1.58		1.6		1.02		52		1.709		1.676
11:28	3.9		122		1.61		1.63		1.01		51		1.515		1.729
11:29	3.9		121		1.62		1.65		1.02		53		1.496		1.6
11:31	3.9		121		1.63		1.66		1.02		55		1.675		1.679
11:33	3.8		121		1.58		1.62		1.03		53		1.565		1.639
11:35	3.9		121		1.64		1.67		1.02		54		1.554		1.662
11:37	3.9		121		1.64		1.68		1.02		55		1.658		1.769
11:39	4		121		1.67		1.73		1.04		55		1.892		1.969
11:41	3.8		121		1.59		1.64		1.03		54		1.733		1.753
11:43	3.5		121		1.46		1.51		1.04		48		1.902		1.917
11:45	3.2		120		1.32		1.34		1.02		47		1.349		1.73
11:46	2.5		120		1.06		1.05		1		36		0.909		0.764
11:48	3.3		120		1.38		1.33		0.97		40		1.219		1.087
11:50	3.8		117		1.57		1.53		0.97		45		1.49		1.583
11:53	3		117		1.25		1.25		1		38		2.04		1.882
11:55	3.4		117		1.4		1.32		0.94		41		1.284		1.365
11:57	3.6		117		1.48		1.46		0.99		46		1.788		1.882
11:59	3.4		116		1.43		1.43		1		46		1.418		1.51
12:01	3.5		116		1.47		1.52		1.04		53		1.562		1.747
12:02	2.6		116		1.09		1.17		1.08		47		1.037		1.421
12:04	3.4		116		1.42		1.56		1.1		56		1.422		1.293
12:05	2.7		115		1.14		1.28		1.13		48		1.097		1.304
12:07	3.2		115		1.31		1.51		1.15		56		1.369		1.477
12:08	3.3		115		1.37		1.54		1.13		53		1.508		1.221
12:10	2.9		114		1.21		1.36		1.13		47		1.584		1.514
12:12	2.4		114		1		1.11		1.11		40		1.219		1.303
12:14	2.5		114		1.05		1.16		1.1		39		1.219		1.179
12:16	2.9		113		1.21		1.33		1.1		43		1.598		1.587
12:18	2.6		113		1.08		1.17		1.09		40		1.416		1.501
12:20	2.5		113		1.05		1.14		1.09		46		1.076		1.476
12:22	3.2		113		1.33		1.49		1.12		51		1.423		1.201
12:24	2.9		113		1.2		1.39		1.16		47		1.878		1.881
12:25	2		113		0.83		0.91		1.11		35		0.845		0.916
12:27	2.8		113		1.16		1.32		1.14		46		1.526		1.399
12:30	2		113		0.85		0.96		1.12		33		1.255		1.254
12:31	1.2		113		0.48		0.51		1.06		22		0.567		0.477
12:32	3.3		113		1.38		1.47		1.07		56		1.116		1.414
12:34	3.1		113		1.28		1.42		1.11		52		1.298		1.252
12:50			110
	3.51934	0.446827	116.612	39.2106	1.4647	0.0776205	1.35702	0.126067	0.916436	0.0108817	45.3978	123.127	1.47983	0.0711532	1.5239	0.0801893
	METS						HR						VO2						VCO2						RER						VE						Vtex						Vtin						LABEL
	Rest		Test		Recovery		Rest		Test		Recovery		Rest		Test		Recovery		Rest		Test		Recovery		Rest		Test		Recovery		Rest		Test		Recovery		Rest		Test		Recovery		Rest		Test		Recovery
	MEDIA	VAR	MEDIA	VAR	MEDIA	VAR	MEDIA	VAR	MEDIA	VAR	MEDIA	VAR	MEDIA	VAR	MEDIA	VAR	MEDIA	VAR	MEDIA	VAR	MEDIA	VAR	MEDIA	VAR	MEDIA	VAR	MEDIA	VAR	MEDIA	VAR	MEDIA	VAR	MEDIA	VAR	MEDIA	VAR	MEDIA	VAR	MEDIA	VAR	MEDIA	VAR	MEDIA	VAR	MEDIA	VAR	MEDIA	VAR	BIN
	1.35	0.063	3.49593	0.415494	3.62239	0.579946	100.4	0.3	115.841	39.5221	119.956	24.4607	0.565	0.01075	1.45481	0.0722441	1.50821	0.100388	0.528333	0.0103767	1.31359	0.125848	1.54821	0.083418	0.935	0.00059	0.889559	0.00880355	1.03478	0.00285866	20.6667	13.8667	44.1898	128.576	50.7164	65.479	1.28367	0.116348	1.46574	0.0678135	1.54191	0.0823077	1.546	0.348671	1.50547	0.0746473	1.60504	0.0978886	0
	1.35	0.063	3.49593	0.415494	3.62239	0.579946	100.4	0.3	115.841	39.5221	119.956	24.4607	0.565	0.01075	1.45481	0.0722441	1.50821	0.100388	0.528333	0.0103767	1.31359	0.125848	1.54821	0.083418	0.935	0.00059	0.889559	0.00880355	1.03478	0.00285866	20.6667	13.8667	44.1898	128.576	50.7164	65.479	1.28367	0.116348	1.46574	0.0678135	1.54191	0.0823077	1.546	0.348671	1.50547	0.0746473	1.60504	0.0978886	0
[truncated: 1 more columns]
