# Supplementary material for: On the development of diagnostic support algorithms based on CPET biosignals data via machine learning and wavelets
Source: PeerJ journal article supplement (doi:10.7717/peerj-cs.2474), 2025-01-30
Supplement: raw_data.zip [file Subject05_BxB.xlsx]

## Sheet: Demographics
Gender:	Male
Age:	80
Height (cm):	173
Weight (kg):	116.8
BMI:	39
Condition:	HFrEf

## Sheet: Subject05_BxB
Time	METS		HR		V'O2		V'CO2		RER		V'E		VTex		VTin
min			1/min		L/min		L/min				L/min		L		L
00:00	Rest
00:02	1.2				0.48		0.48		1.01		18		0.464
00:06	1.1		75		0.44		0.4		0.9		15		0.981		0.915
00:10	1.1		74		0.44		0.4		0.92		15		1.099		1.117
00:13	1.2		74		0.47		0.42		0.89		17		0.776		0.701
00:16	1		72		0.42		0.37		0.88		15		0.724		0.728
00:18	1		72		0.39		0.34		0.87		14		0.655		0.657
00:23	1.1		73		0.47		0.41		0.88		15		1.059		1.076
00:28	0.7		73		0.29		0.24		0.82		9		0.741		0.574
00:29	0		73		0.02		0.01		0.42		6		0.149		0.37
00:31	1.2		73		0.48		0.37		0.77		16		0.518		0.776
00:34	1.5		73		0.6		0.46		0.77		19		0.698		0.614
00:36	1.8		74		0.75		0.59		0.79		23		0.965		0.977
00:36	Test
00:39	1.4		75		0.55		0.45		0.81		19		0.887		0.827
00:42	1.5		74		0.61		0.51		0.82		20		0.837		0.87
00:44	1.5		74		0.62		0.52		0.83		21		0.808		0.827
00:47	1.4		74		0.59		0.49		0.83		19		0.819		0.753
00:49	1.5		74		0.61		0.51		0.84		20		0.849		0.896
00:51	1.6		74		0.67		0.56		0.84		22		0.798		0.9
00:54	1.5		75		0.62		0.52		0.84		20		1.018		0.362
00:56	1.3		75		0.53		0.43		0.82		19		0.583		1.359
00:59	1.8		75		0.75		0.64		0.86		24		1.131		1.098
01:02	1.7		78		0.7		0.6		0.86		23		1.019		1.07
01:04	1.6		79		0.64		0.55		0.86		21		0.98		0.897
01:07	1.6		79		0.65		0.55		0.85		23		0.833		0.945
01:08	1.8		79		0.72		0.62		0.87		29		0.764		1.001
01:10	1.3		79		0.52		0.45		0.86		19		0.717		0.435
01:12	2.1		79		0.85		0.71		0.83		31		0.819		0.917
01:14	1.6		79		0.67		0.57		0.86		27		0.658		0.784
01:15	1.1		79		0.45		0.37		0.83		20		0.411		0.349
01:17	1.5		79		0.59		0.49		0.82		22		0.77		0.564
01:19	1		79		0.42		0.32		0.77		17		0.521		0.471
01:20	1.6		79		0.67		0.52		0.78		23		0.632		0.718
01:23	2.2		79		0.89		0.7		0.79		26		1.116		0.922
01:25	1.6		79		0.65		0.5		0.77		21		0.634		0.982
01:27	2.2		79		0.9		0.71		0.79		27		1.072		0.971
01:29	2.1		78		0.86		0.69		0.79		27		1.016		1.106
01:32	1.9		78		0.77		0.62		0.8		24		0.984		1.014
01:34	2.1		78		0.86		0.69		0.81		27		1.055		1.098
01:37	2		78		0.83		0.66		0.8		25		1.011		0.962
01:39	1.9		78		0.77		0.62		0.81		24		1.005		1.031
01:41	1.8		79		0.73		0.58		0.8		23		0.896		0.945
01:44	2.2		79		0.89		0.71		0.8		28		1.005		1.049
01:46	2.1		80		0.87		0.71		0.81		28		1.038		1.052
01:47	2		80		0.8		0.65		0.81		30		0.771		0.966
01:49	1.8		80		0.75		0.61		0.82		30		0.775		0.733
01:54	1.6		80		0.64		0.51		0.8		18		1.407		0.842
01:56	2.5		81		1.04		0.79		0.76		31		1.005		1.173
02:00	1.5		81		0.62		0.48		0.77		18		1.217		0.977
02:02	2.6		81		1.05		0.78		0.74		29		1.152		1.162
02:04	2.9		81		1.18		0.89		0.75		34		1.073		1.049
02:06	2.4		80		0.96		0.74		0.77		29		1.158		1.16
02:09	2.2		80		0.91		0.72		0.79		29		1.113		1.198
02:11	2.3		81		0.95		0.76		0.8		31		1.058		1.133
02:13	1.5		81		0.6		0.48		0.8		17		0.754		0.862
02:16	2.6		81		1.04		0.84		0.81		32		1.155		1.164
02:18	2.2		81		0.91		0.74		0.81		29		1.144		1.174
02:20	2.2		81		0.91		0.75		0.83		30		1.116		1.198
02:22	2.2		81		0.91		0.76		0.83		29		1.063		1.065
02:25	2		81		0.83		0.69		0.84		27		0.996		1.094
02:27	2.3		81		0.93		0.79		0.85		31		1.18		1.206
02:29	2		81		0.83		0.71		0.85		27		1.004		1.073
02:31	2.3		82		0.96		0.82		0.86		31		1.132		1.145
02:33	2.1		82		0.85		0.74		0.86		28		1.045		1.126
02:36	2		82		0.8		0.68		0.86		26		1.008		1.011
02:38	2.4		82		0.99		0.84		0.86		33		1.058		1.168
02:41	2.1		82		0.84		0.72		0.85		25		1.424		1.053
02:43	2		82		0.82		0.69		0.84		27		0.954		1.281
02:45	2.2		83		0.9		0.76		0.85		29		0.971		1.034
02:47	2.4		83		0.97		0.82		0.85		31		1.094		1.1
02:50	2.4		83		0.97		0.83		0.86		31		1.12		1.135
02:52	2.3		83		0.93		0.8		0.86		30		1.106		1.122
02:54	2.2		83		0.89		0.77		0.87		29		1.125		1.194
02:56	2.4		83		0.98		0.86		0.87		33		1.134		1.174
02:58	2.4		83		0.97		0.85		0.88		32		1.191		1.113
03:01	2.1		84		0.84		0.75		0.89		28		1.115		1.223
03:03	2.2		84		0.88		0.78		0.88		29		1.143		1.178
03:05	2.2		84		0.89		0.78		0.88		29		1.126		1.146
03:08	2.2		84		0.91		0.79		0.87		30		1.094		1.009
03:10	2.1		84		0.85		0.74		0.88		28		1.102		1.261
03:12	2.3		84		0.96		0.83		0.87		31		1.105		1.14
03:14	2.3		85		0.95		0.83		0.87		31		1.065		1.084
03:16	2.2		85		0.91		0.79		0.87		31		1.051		1.052
03:18	2.5		85		1.01		0.9		0.89		34		1.164		1.212
03:21	2.2		85		0.89		0.79		0.89		29		1.086		1.089
03:23	2.4		85		0.98		0.87		0.89		33		1.135		1.217
03:25	2.4		85		0.97		0.87		0.9		34		1.061		1.104
03:27	2.3		85		0.95		0.85		0.9		32		1.154		1.179
03:29	2.4		85		0.96		0.87		0.9		33		1.019		1.162
03:31	2.5		85		1.04		0.96		0.92		35		1.212		1.154
03:32	2.4		85		0.98		0.9		0.92		36		1.083		1.115
03:35	2.1		86		0.87		0.81		0.92		30		1.084		1.139
03:37	2.2		86		0.88		0.8		0.91		29		1.109		1.157
03:39	2.3		86		0.94		0.86		0.92		34		1.143		1.173
03:41	2.8		86		1.16		1.05		0.91		41		1.159		1.182
03:43	2.4		86		0.99		0.91		0.92		35		1.174		1.132
03:45	2.5		86		1.01		0.93		0.92		35		1.285		1.175
03:47	2.5		86		1.04		0.96		0.92		37		1.158		1.214
03:48	2.3		86		0.96		0.88		0.92		36		1.009		1.021
03:50	2.2		86		0.9		0.84		0.94		31		1.126		1.136
03:53	2.4		86		0.96		0.9		0.93		32		1.212		1.213
03:55	2.1		86		0.86		0.8		0.93		30		1.099		1.235
03:57	2.4		86		0.98		0.91		0.92		33		1.211		1.173
03:59	2.2		86		0.92		0.85		0.93		32		1.055		1.177
04:01	2.4		86		0.98		0.91		0.93		35		1.146		1.197
04:03	2.7		86		1.11		1.04		0.93		39		1.205		1.156
04:05	2.3		87		0.95		0.88		0.93		33		1.187		1.201
04:07	2.3		87		0.94		0.88		0.94		32		1.219		1.299
04:09	2.3		87		0.96		0.9		0.94		34		1.153		1.218
04:12	2.5		87		1.02		0.95		0.93		35		1.232		1.224
04:13	1.8		87		0.74		0.7		0.95		31		0.809		1.135
04:15	2.9		87		1.19		1.12		0.94		43		1.186		0.997
04:17	2.1		87		0.87		0.81		0.93		34		1.101		1.086
04:18	2.8		87		1.16		1.08		0.93		41		1.133		1.094
04:20	2.8		88		1.13		1.06		0.93		42		1.158		1.088
04:22	2.2		88		0.88		0.83		0.94		36		1.026		1.069
04:24	2.8		88		1.15		1.09		0.95		41		1.257		1.137
04:25	2.5		88		1.03		0.98		0.96		38		1.167		1.229
04:28	2.4		88		0.97		0.93		0.96		35		1.228		1.347
04:30	1.8		88		0.74		0.7		0.95		22		1.065		1.259
04:33	2.7		88		1.12		1.06		0.94		37		1.313		1.281
04:35	2.4		88		0.99		0.93		0.94		34		1.169		1.25
04:37	2.4		88		0.97		0.91		0.94		34		1.155		1.207
04:39	2.4		88		0.99		0.93		0.94		34		1.324		1.238
04:41	2		88		0.81		0.75		0.93		30		1.13		1.147
04:43	1.8		88		0.72		0.64		0.89		25		0.872		0.81
04:46	2.5		88		1.04		0.93		0.89		31		1.128		1.18
04:47	3.1		88		1.27		1.13		0.89		42		1.172		1.217
04:49	2.6		88		1.05		0.96		0.91		34		1.259		1.261
04:52	2.5		88		1.04		0.96		0.92		34		1.245		1.299
04:54	2.5		88		1.03		0.95		0.93		33		1.231		1.27
04:56	2.3		88		0.95		0.89		0.93		32		1.176		1.281
04:58	2.7		88		1.09		1.03		0.94		38		1.282		1.265
05:00	2.4		88		0.99		0.95		0.96		36		1.153		1.253
05:02	2.6		88		1.05		1		0.96		37		1.255		1.262
05:04	2.4		88		0.97		0.93		0.96		35		1.192		1.23
05:06	2.2		88		0.91		0.88		0.96		32		1.18		1.229
05:09	2.1		88		0.87		0.83		0.95		31		1.209		1.1
05:11	2.9		88		1.18		1.12		0.95		41		1.296		1.325
05:12	2.5		88		1		0.96		0.95		37		1.141		1.227
05:14	2.4		89		1		0.95		0.96		35		1.213		1.215
05:17	2.5		89		1.03		0.98		0.95		35		1.265		1.269
05:19	2.7		89		1.09		1.04		0.96		38		1.273		1.316
05:21	2.1		90		0.87		0.83		0.95		32		1.014		1.013
05:23	2.5		90		1		0.96		0.96		36		1.228		1.248
05:25	2.5		90		1.03		0.98		0.96		37		1.159		1.211
05:27	2.5		90		1.04		1.01		0.97		35		1.235		1.223
05:29	2.7		90		1.09		1.05		0.97		39		1.251		1.314
05:30	2.5		90		1.03		1		0.97		36		1.204		1.251
05:32	2.4		90		0.98		0.95		0.98		37		1.135		1.21
05:34	1.6		90		0.65		0.65		1		29		0.796		1.157
05:36	1.7		90		0.69		0.65		0.95		25		0.782		0.516
05:38	2.9		90		1.19		1.11		0.93		40		1.182		1.16
05:39	2.4		90		0.99		0.92		0.93		36		1.056		1.126
05:41	3.1		90		1.26		1.18		0.93		46		1.127		1.162
05:43	2.6		90		1.08		1.03		0.96		40		1.135		1.163
05:45	2.4		90		0.99		0.95		0.96		35		1.336		1.198
05:45	Recovery
05:46	2.9		90		1.18		1.13		0.96		44		1.123		1.236
05:48	2.4		90		0.99		0.96		0.96		36		1.201		1.141
05:50	2.4		90		1		0.96		0.97		35		1.188		1.287
05:52	2.5		90		1.04		0.99		0.95		37		1.091		1.061
05:54	2		90		0.83		0.79		0.95		29		0.972		0.944
05:56	2.4		90		1		0.95		0.95		35		1.133		1.251
05:58	2.4		90		0.98		0.93		0.95		34		1.12		1.106
06:00	2		90		0.8		0.74		0.92		27		0.82		0.762
06:02	2.1		90		0.88		0.82		0.93		30		1.073		1.075
06:04	2.3		93		0.95		0.87		0.92		30		1.08		1.068
06:06	2.6		93		1.05		0.96		0.92		36		1.114		1.18
06:08	2.5		93		1.04		0.98		0.94		34		1.16		1.187
06:10	2.6				1.04		0.98		0.94		34		1.181		1.193
06:12	2.4				0.99		0.93		0.94		33		1.055		1.081
06:14	2.1		87		0.86		0.82		0.95		28		1.026		1.037
06:17	2.2		87		0.91		0.86		0.94		29		1.172		1.196
06:20	2		96		0.82		0.78		0.96		24		1.212		1.376
06:22	2.3		96		0.96		0.89		0.93		30		1.005		0.967
06:24	2.4		96		0.97		0.9		0.93		30		1.108		1.138
06:26	2.3		92		0.93		0.86		0.93		29		0.979		0.969
06:28	2.2		92		0.92		0.86		0.93		29		1.097		1.087
06:31	2.3		89		0.94		0.89		0.94		28		1.255		1.229
06:33	2.2		89		0.9		0.84		0.94		28		1.092		1.19
06:36	2.2		89		0.9		0.86		0.96		28		1.095		1.14
06:38	2.2		89		0.88		0.84		0.96		28		1.1		1.171
06:40	1.9		89		0.8		0.77		0.96		26		1.015		1.087
06:42	2.2		89		0.92		0.89		0.97		30		1.099		1.149
06:45	2.1		90		0.88		0.85		0.97		29		1.037		0.994
06:47	2		90		0.83		0.82		0.98		28		1.039		1.048
06:49	1.9		90		0.79		0.78		0.98		27		0.948		0.983
06:51	2		90		0.82		0.8		0.98		29		0.998		0.893
06:53	2		90		0.8		0.78		0.98		31		0.817		0.952
06:54	2.1		90		0.84		0.83		0.98		31		0.937		0.898
06:56	2		90		0.82		0.83		1.01		30		1.019		1.01
06:58	2		90		0.8		0.81		1.01		30		0.935		0.914
07:00	2		89		0.82		0.83		1.02		30		0.967		0.929
07:03	1.8		89		0.74		0.75		1.01		26		1.024		0.975
07:05	2		88		0.81		0.82		1.01		29		1.08		1.037
07:07	1.8		88		0.75		0.77		1.02		27		1.072		1.077
07:09	1.8		88		0.74		0.75		1.01		28		0.895		0.995
07:11	1.9		89		0.77		0.78		1.01		29		0.924		0.853
07:13	1.8		89		0.72		0.74		1.04		27		0.971		0.914
07:15	1.6		89		0.65		0.68		1.04		25		0.894		0.94
07:17	1.8		89		0.74		0.75		1.02		29		0.956		0.892
07:19	1.6		89		0.65		0.68		1.04		27		0.83		0.925
07:22	1.3		88		0.54		0.56		1.03		21		1.168		0.819
07:24	1.3		88		0.52		0.53		1.01		22		0.753		0.777
07:26	1.3		88		0.53		0.52		0.99		20		0.706		0.624
07:28	1.7		88		0.71		0.69		0.97		25		0.823		0.794
07:31	1.8		87		0.72		0.71		0.99		26		0.914		0.918
07:33	1.7		87		0.71		0.71		1		25		0.935		0.885
07:35	1.7		86		0.69		0.7		1.01		25		0.976		0.943
07:38	1.6		86		0.67		0.69		1.02		25		0.985		0.959
07:40	1.6		86		0.64		0.66		1.03		24		0.956		0.992
07:42	1.5		86		0.61		0.65		1.05		24		0.945		0.949
07:45	1.6		86		0.64		0.68		1.06		25		1.043		1.034
07:47	1.4		86		0.58		0.63		1.08		23		0.942		0.974
07:49	1.3		86		0.53		0.57		1.06		22		0.815		0.749
07:52	1.4		86		0.59		0.64		1.09		23		0.968		0.91
08:08			85
08:23			83
08:39			85
	2.13842	0.165348	85.4265	21.2015	0.874975	0.0278469	0.798621	0.0267991	0.91266	0.00521962	30.0246	32.4697	1.05473	0.0266261	1.06993	0.0325724
	METS						HR						VO2						VCO2						RER						VE						Vtex						Vtin						LABEL
	Rest		Test		Recovery		Rest		Test		Recovery		Rest		Test		Recovery		Rest		Test		Recovery		Rest		Test		Recovery		Rest		Test		Recovery		Rest		Test		Recovery		Rest		Test		Recovery
	MEDIA	VAR	MEDIA	VAR	MEDIA	VAR	MEDIA	VAR	MEDIA	VAR	MEDIA	VAR	MEDIA	VAR	MEDIA	VAR	MEDIA	VAR	MEDIA	VAR	MEDIA	VAR	MEDIA	VAR	MEDIA	VAR	MEDIA	VAR	MEDIA	VAR	MEDIA	VAR	MEDIA	VAR	MEDIA	VAR	MEDIA	VAR	MEDIA	VAR	MEDIA	VAR	MEDIA	VAR	MEDIA	VAR	MEDIA	VAR	BIN
	1.075	0.1875	2.19931	0.165524	1.98983	0.136102	73.2727	0.818182	83.9167	19.5455	89.05	6.65847	0.4375	0.0298568	0.899236	0.0279204	0.815763	0.0231179	0.374167	0.0201538	0.799167	0.0317266	0.797288	0.0151098	0.826667	0.0211333	0.883819	0.00372587	0.983051	0.00188708	15.1667	19.2424	30.6389	36.9176	28.5254	18.8399	0.73575	0.0749467	1.07134	0.0308984	1.0142	0.014196	0.773182	0.051989	1.09258	0.0355246	1.01464	0.0214721	0
	1.075	0.1875	2.19931	0.165524	1.98983	0.136102	73.2727	0.818182	83.9167	19.5455	89.05	6.65847	0.4375	0.0298568	0.899236	0.0279204	0.815763	0.0231179	0.374167	0.0201538	0.799167	0.0317266	0.797288	0.0151098	0.826667	0.0211333	0.883819	0.00372587	0.983051	0.00188708	15.1667	19.2424	30.6389	36.9176	28.5254	18.8399	0.73575	0.0749467	1.07134	0.0308984	1.0142	0.014196	0.773182	0.051989	1.09258	0.0355246	1.01464	0.0214721	0
[truncated: 1 more columns]
