# Supplementary material for: On the development of diagnostic support algorithms based on CPET biosignals data via machine learning and wavelets
Source: PeerJ journal article supplement (doi:10.7717/peerj-cs.2474), 2025-01-30
Supplement: raw_data.zip [file Subject06_BxB.xlsx]

## Sheet: Demographics
Gender:	Female
Age:	54
Height (cm):	158
Weight (kg):	103.1
BMI:	41
Condition:	HFrEf

## Sheet: Subject06_BxB
Time	METS		HR		V'O2		V'CO2		RER		V'E		VTex		VTin
min			1/min		L/min		L/min				L/min		L		L
00:00	Rest
01:15
01:30			88
01:46			93
02:02			97
02:18			100
02:34			100
02:49			99
03:05			104
03:10	1.1		98		0.41		0.37		0.89		12		0.903		0.111
03:14	1.4		98		0.49		0.47		0.95		17		1.12		2.145
03:17	1.1		96		0.39		0.37		0.95		14		0.762		0.852
03:20	1.1		96		0.41		0.38		0.91		14		0.652		0.58
03:23	0.8		96		0.29		0.26		0.92		10		0.609		0.732
03:26	1.4		94		0.49		0.46		0.94		17		0.86		0.863
03:30	1.3		95		0.47		0.45		0.96		17		0.922		0.834
03:33	1.1		95		0.41		0.41		0.99		16		1.011		0.976
03:36	0.8		97		0.3		0.29		0.97		13		0.554		0.692
03:39	0.8		91		0.31		0.3		0.98		13		0.675		0.758
03:43	1.5		91		0.53		0.51		0.97		18		1.109		0.857
03:47	0.9		90		0.31		0.31		0.99		13		0.776		0.961
03:50	0.9		92		0.31		0.29		0.94		12		0.65		0.626
03:53	1.3		92		0.46		0.43		0.92		16		0.848		0.784
03:56	1.4		95		0.49		0.45		0.91		16		0.832		0.731
04:00	1		94		0.35		0.33		0.94		13		0.79		0.89
04:03	1.3		94		0.47		0.43		0.9		16		0.738		0.594
04:05	1.4		95		0.52		0.44		0.86		16		0.72		0.476
04:08	1.6		95		0.59		0.51		0.87		18		0.799		0.799
04:10	1.3		94		0.47		0.42		0.9		16		0.665		0.776
04:13	1.3		94		0.46		0.4		0.88		15		0.554		0.537
04:15	0.4		94		0.16		0.13		0.81		6		0.217		0.25
04:17	0.6		94		0.22		0.17		0.78		7		0.25		0.239
04:20	1.7		95		0.61		0.48		0.79		17		0.705		0.735
04:20	Test
04:24	2		94		0.73		0.7		0.96		27		1.94		2.094
04:27	1.7		93		0.63		0.63		1		23		1.082		1.02
04:30	1.4		94		0.51		0.48		0.95		17		0.897		0.856
04:33	1.3		94		0.47		0.41		0.87		14		0.729		0.737
04:36	2.1		98		0.75		0.64		0.84		21		1.024		0.942
04:39	2.1		98		0.75		0.64		0.86		22		0.979		1.017
04:41	1.8		100		0.64		0.54		0.84		19		0.83		0.786
04:44	2.4		100		0.88		0.72		0.82		23		1.01		0.962
04:46	2.1		100		0.77		0.63		0.82		21		0.813		0.899
04:49	2.8		100		1.01		0.85		0.84		29		1.225		1.237
04:51	2.5		101		0.92		0.77		0.83		27		0.887		0.894
04:52	2.8		101		0.99		0.82		0.82		29		0.842		0.8
04:54	2.5		102		0.92		0.73		0.8		25		0.825		0.863
04:57	3		102		1.07		0.87		0.81		30		1.216		1.225
04:59	2.9		102		1.06		0.84		0.79		29		1.075		1.108
05:01	3.1		102		1.13		0.87		0.77		30		0.928		0.98
05:03	3.3		102		1.2		0.93		0.77		32		1.029		1.043
05:05	3.6		104		1.28		1.01		0.79		34		1.375		1.295
05:08	2.6		104		0.95		0.73		0.77		23		1.121		1.369
05:11	3.8		106		1.37		1.09		0.8		37		1.449		1.548
05:13	3.8		106		1.36		1.08		0.79		36		1.172		1.198
05:15	3.8		107		1.37		1.1		0.81		38		1.251		1.331
05:16	3.7		107		1.34		1.08		0.81		36		1.104		1.091
05:18	3.6		107		1.3		1.05		0.81		36		1.143		1.226
05:20	3.4		108		1.21		0.99		0.81		33		1.024		1.146
05:22	4.1		108		1.49		1.22		0.82		40		1.282		1.235
05:25	4.1		110		1.49		1.25		0.84		41		1.63		1.513
05:27	4		110		1.46		1.27		0.87		43		1.695		1.898
05:29	2.9		110		1.06		0.9		0.85		32		1.086		1.241
05:31	4.4		113		1.57		1.35		0.86		44		1.402		1.362
05:33	4.2		113		1.51		1.3		0.86		42		1.303		1.379
05:35	4.2		116		1.53		1.34		0.88		45		1.456		1.538
05:36	4.1		116		1.49		1.32		0.89		44		1.385		1.435
05:38	4.1		116		1.47		1.31		0.89		45		1.307		1.415
05:40	4		118		1.44		1.3		0.9		43		1.432		1.507
05:42	4		118		1.43		1.31		0.91		44		1.427		1.537
05:44	4.1		118		1.49		1.35		0.91		45		1.378		1.4
05:46	4		120		1.46		1.33		0.91		44		1.327		1.368
05:48	4		120		1.43		1.3		0.91		43		1.279		1.413
05:50	4		121		1.43		1.33		0.93		42		1.735		1.776
05:52	4.1		121		1.48		1.35		0.91		45		1.331		1.492
05:54	4.4		121		1.57		1.45		0.92		48		1.38		1.432
05:55	4.3		122		1.55		1.43		0.92		49		1.306		1.399
05:57	4.2		122		1.53		1.44		0.94		48		1.425		1.474
05:59	4.2		122		1.51		1.43		0.94		48		1.504		1.511
06:01	4.1		123		1.47		1.39		0.95		46		1.465		1.597
06:03	4.2		123		1.5		1.43		0.95		48		1.473		1.523
06:05	4.4		125		1.57		1.51		0.96		49		1.871		1.785
06:07	4		125		1.44		1.39		0.97		45		1.815		1.998
06:09	4.1		125		1.49		1.39		0.94		45		1.33		1.431
06:11	4.2		126		1.51		1.4		0.93		46		1.253		1.364
06:12	4.4		126		1.58		1.48		0.94		48		1.372		1.414
06:14	4.4		127		1.58		1.51		0.95		50		1.489		1.594
06:16	4.5		127		1.61		1.54		0.96		51		1.42		1.514
06:18	4.4		127		1.59		1.56		0.98		51		1.721		1.723
06:20	4.3		127		1.54		1.5		0.97		49		1.436		1.619
06:22	4.3		127		1.54		1.52		0.99		49		1.54		1.575
06:23	4.4		127		1.57		1.57		1		54		1.527		1.713
06:25	4.4		129		1.59		1.58		1		53		1.421		1.494
06:27	4.4		129		1.58		1.57		1		53		1.446		1.508
06:28	4.5		129		1.61		1.61		1		53		1.538		1.617
06:30	4.4		129		1.59		1.58		1		53		1.608		1.675
06:33	4		129		1.43		1.4		0.98		44		1.772		1.618
06:35	4.3		129		1.54		1.45		0.94		46		1.572		1.697
06:36	4.5		129		1.62		1.54		0.95		50		1.593		1.7
06:38	4.6		129		1.65		1.62		0.98		54		1.6		1.802
06:40	4.7		130		1.68		1.68		1		59		1.472		1.646
06:41	4.4		130		1.59		1.62		1.02		56		1.344		1.289
06:43	4.5		130		1.63		1.63		1		55		1.531		1.57
06:44	4.4		130		1.57		1.57		1		55		1.407		1.504
06:46	4.4		130		1.59		1.6		1.01		54		1.453		1.494
06:48	4.4		130		1.58		1.59		1.01		54		1.467		1.541
06:49	4.4		131		1.58		1.58		1		54		1.433		1.581
06:51	4.6		131		1.66		1.73		1.04		60		1.48		1.568
06:52	3.9		131		1.4		1.44		1.03		48		1.278		1.442
06:54	4.7		131		1.7		1.76		1.04		59		1.477		1.51
06:55	4.5		133		1.62		1.69		1.04		59		1.427		1.567
06:57	4.6		133		1.67		1.74		1.05		59		1.576		1.487
06:59	4.3		133		1.54		1.6		1.04		53		1.656		1.786
07:00	4.5		129		1.62		1.67		1.03		55		1.488		1.592
07:02	4.6		129		1.65		1.7		1.03		58		1.495		1.599
07:04	3.4		129		1.23		1.26		1.02		43		1.227		1.428
07:05	4.8		134		1.74		1.79		1.03		63		1.264		1.455
07:06	5		134		1.8		1.86		1.04		62		1.472		1.39
07:08	4.7		134		1.69		1.76		1.04		62		1.335		1.421
07:09	4.6		134		1.67		1.76		1.06		62		1.397		1.515
07:10	4.6		136		1.67		1.79		1.07		62		1.498		1.514
07:12	4.5		136		1.63		1.72		1.06		58		1.517		1.623
07:13	4.3		136		1.56		1.65		1.06		57		1.375		1.577
07:15	4.5		136		1.64		1.72		1.05		60		1.174		1.175
07:15	3.1		136		1.12		1.09		0.98		37		0.573		0.591
07:17	5		136		1.79		1.79		1		57		1.572		1.66
07:19	4.9		136		1.78		1.81		1.02		61		1.53		1.663
07:20	4.7		137		1.7		1.79		1.06		62		1.566		1.714
07:21	4.7		137		1.68		1.8		1.07		64		1.444		1.517
07:23	4.4		137		1.6		1.72		1.08		60		1.502		1.586
07:24	4.5		136		1.61		1.74		1.08		60		1.402		1.54
07:26	4.3		136		1.54		1.64		1.06		54		1.591		1.439
07:28	3.3		136		1.18		1.16		0.99		36		1.213		1.592
07:30	5.4		136		1.95		1.97		1.01		62		1.664		1.67
07:31	4.9		136		1.77		1.84		1.04		63		1.511		1.685
07:33	4.5		136		1.63		1.72		1.06		61		1.362		1.481
07:34	4.6		136		1.67		1.78		1.07		63		1.407		1.465
07:35	4.8		136		1.72		1.85		1.08		64		1.529		1.578
07:37	4.6		136		1.66		1.78		1.07		61		1.596		1.684
07:38	4.5		136		1.62		1.75		1.08		62		1.522		1.6
07:40	4.5		137		1.61		1.73		1.07		60		1.516		1.629
07:41	4.3		137		1.57		1.68		1.07		57		1.318		1.461
07:43	4.5		137		1.64		1.76		1.07		60		1.431		1.467
07:44	4.6		137		1.66		1.76		1.06		60		1.384		1.479
07:45	4.7		137		1.68		1.8		1.07		63		1.472		1.577
07:47	4.6		137		1.67		1.79		1.07		62		1.376		1.517
07:48	4.4		137		1.61		1.73		1.08		62		1.395		1.486
07:50	4.6		137		1.65		1.78		1.08		61		1.473		1.546
07:51	2.4		137		0.85		0.95		1.12		44		0.849		1.703
07:53	5.1		137		1.84		1.9		1.04		61		1.873		0.928
07:55	4.4		139		1.59		1.58		0.99		49		1.573		1.592
07:56	5.1		139		1.84		1.84		1		62		1.494		1.757
07:57	4.9		139		1.78		1.85		1.04		63		1.531		1.642
07:59	4.7		139		1.69		1.79		1.06		61		1.573		1.691
08:00	4.6		139		1.64		1.78		1.08		63		1.502		1.63
08:02	4.5		139		1.61		1.76		1.09		63		1.422		1.495
08:03	4.4		139		1.57		1.72		1.1		62		1.438		1.53
08:05	3.6		141		1.29		1.37		1.06		47		1.326		1.41
08:06	4.6		141		1.66		1.75		1.05		58		1.596		1.555
08:08	4.7		141		1.69		1.77		1.05		63		1.479		1.669
08:09	4.7		134		1.68		1.79		1.07		63		1.381		1.477
08:11	4.8		134		1.73		1.86		1.08		64		1.529		1.619
08:12	4.5		134		1.64		1.76		1.07		62		1.464		1.608
08:14	4.6		134		1.67		1.8		1.08		63		1.588		1.611
08:15	4.6		134		1.65		1.78		1.08		64		1.558		1.758
08:16	4.3		134		1.55		1.7		1.1		63		1.438		1.583
08:18	3.5		134		1.26		1.33		1.06		50		0.958		1.041
08:18	Recovery
08:19	3.3		141		1.2		1.23		1.03		42		1.219		1.467
08:21	5.7		141		2.06		2.16		1.05		72		1.478		1.409
08:22	5		141		1.79		1.92		1.07		70		1.328		1.483
08:23	4.9		141		1.75		1.89		1.08		67		1.453		1.427
08:24	4.6		142		1.65		1.8		1.09		64		1.503		1.635
08:26	3.8		142		1.39		1.49		1.07		52		1.364		1.533
08:28	4.8		142		1.72		1.81		1.05		60		1.613		1.609
08:29	4.4		142		1.59		1.7		1.06		61		1.383		1.697
08:30	4.6		142		1.65		1.72		1.04		59		1.086		0.95
08:32	4.3		142		1.55		1.62		1.04		56		1.433		1.544
08:34	2.7		142		0.97		1.02		1.04		37		1.253		1.543
08:35	5		142		1.8		1.76		0.98		54		1.341		1.183
08:37	5.4		142		1.96		1.95		1		62		1.572		1.481
08:38	4		142		1.46		1.44		0.99		48		1.45		1.648
08:40	4.9		134		1.78		1.78		1		55		1.724		1.785
08:42	4.7		134		1.7		1.69		1		54		1.46		1.546
08:43	4.6		134		1.66		1.68		1.01		57		1.47		1.599
08:45	4.5		141		1.61		1.64		1.02		56		1.545		1.635
08:47	4.5		141		1.62		1.63		1		52		1.766		1.637
08:49	4		141		1.43		1.44		1.01		49		1.445		1.714
08:50	4.5		139		1.61		1.63		1.01		56		1.44		1.491
08:52	4.1		139		1.48		1.52		1.03		53		1.451		1.594
08:54	4		139		1.46		1.45		1		48		1.156		1.269
08:55	4.9		133		1.78		1.81		1.02		62		1.469		1.53
08:56	4.6		133		1.67		1.73		1.04		61		1.498		1.583
08:58	4.3		133		1.56		1.62		1.04		57		1.466		1.566
09:00	4.3		133		1.55		1.63		1.05		57		1.493		1.587
09:01	4.5		133		1.61		1.68		1.04		58		1.555		1.633
09:03	4.3		133		1.55		1.65		1.06		59		1.469		1.611
09:04	4.5		133		1.61		1.72		1.07		62		1.46		1.548
09:06	4.3		139		1.54		1.64		1.07		59		1.534		1.591
09:07	4.2		139		1.5		1.6		1.07		57		1.496		1.606
09:09	4.2		139		1.5		1.58		1.05		56		1.463		1.575
09:10	4.1		139		1.47		1.57		1.07		57		1.348		1.528
09:12	4.5		139		1.61		1.7		1.05		56		1.684		1.533
09:14	4.2		139		1.51		1.58		1.05		55		1.63		1.785
09:15	4.2		139		1.52		1.58		1.04		54		1.553		1.645
09:17	4.1		139		1.49		1.56		1.05		55		1.46		1.694
09:19	3.8		139		1.37		1.46		1.06		54		1.351		1.525
09:20	4.2		137		1.51		1.59		1.06		55		1.614		1.637
09:22	3		137		1.09		1.1		1.01		39		0.948		1.042
09:24	3.8		137		1.37		1.35		0.99		45		1.797		1.746
09:26	4.4		137		1.6		1.5		0.94		46		1.262		1.253
09:27	5		137		1.8		1.75		0.97		59		1.476		1.577
09:29	4.6		129		1.66		1.66		1		59		1.485		1.592
09:30	4.5		129		1.62		1.67		1.03		59		1.623		1.608
09:32	3.5		129		1.26		1.29		1.02		45		1.402		1.441
09:34	4.3		129		1.55		1.56		1.01		54		1.409		1.625
09:36	4		122		1.43		1.45		1.01		51		1.364		1.421
09:37	4.2		122		1.52		1.54		1.02		54		1.483		1.521
09:39	4.2		122		1.5		1.52		1.01		55		1.409		1.47
09:41	3.3		130		1.18		1.2		1.01		43		1.291		1.434
09:42	4		130		1.44		1.48		1.03		56		1.382		1.505
09:43	4.1		130		1.48		1.55		1.05		57		1.357		1.361
09:45	3.9		134		1.42		1.49		1.05		53		1.44		1.346
09:47	3.7		134		1.33		1.36		1.02		48		1.364		1.357
09:49	3.8		134		1.36		1.37		1.01		45		1.386		1.416
09:50	3		133		1.1		1.07		0.98		38		0.994		1.299
09:52	4.8		133		1.75		1.71		0.98		53		1.583		1.253
09:54	4.3		133		1.56		1.52		0.98		51		1.505		1.687
09:55	3.9		131		1.42		1.43		1.01		50		1.424		1.504
09:57	3.9		131		1.39		1.43		1.03		49		1.374		1.463
09:59	3.6		116		1.3		1.35		1.04		49		1.327		1.351
10:01	3.5		116		1.27		1.34		1.05		46		1.403		1.4
10:02	3.4		116		1.22		1.28		1.04		44		1.338		1.362
10:04	3.2		121		1.15		1.21		1.05		43		1.324		1.341
10:06	3.3		121		1.18		1.24		1.04		43		1.354		1.354
10:08	3.1		121		1.12		1.19		1.06		44		1.207		1.364
10:09	3.3		123		1.2		1.29		1.08		47		1.16		1.14
10:11	3.1		123		1.11		1.18		1.07		42		1.097		1.017
10:13	3		123		1.09		1.16		1.06		41		1.292		1.292
10:15	2.9		122		1.03		1.11		1.07		38		1.261		1.258
10:17	2.8		122		1.02		1.11		1.08		38		1.295		1.324
10:19	2.6		121		0.94		1.05		1.11		38		1.256		1.249
10:21	2.6		121		0.93		1.02		1.1		37		1.177		1.201
10:23	1.8		121		0.65		0.69		1.06		23		1.055		1.129
10:25	2.4		120		0.85		0.91		1.06		32		1.068		1.293
10:33			117						1.01
10:49			115
11:05			109
11:20			106
11:36			104
11:52			108
12:08			105
12:23			107
12:39			104
	4.03952	0.623646	126.927	162.041	1.4561	0.0806584	1.45748	0.112856	0.995213	0.00701936	49.9	134.167	1.38721	0.0470017	1.45812	0.0552369
	METS						HR						VO2						VCO2						RER						VE						Vtex						Vtin						LABEL
	Rest		Test		Recovery		Rest		Test		Recovery		Rest		Test		Recovery		Rest		Test		Recovery		Rest		Test		Recovery		Rest		Test		Recovery		Rest		Test		Recovery		Rest		Test		Recovery
	MEDIA	VAR	MEDIA	VAR	MEDIA	VAR	MEDIA	VAR	MEDIA	VAR	MEDIA	VAR	MEDIA	VAR	MEDIA	VAR	MEDIA	VAR	MEDIA	VAR	MEDIA	VAR	MEDIA	VAR	MEDIA	VAR	MEDIA	VAR	MEDIA	VAR	MEDIA	VAR	MEDIA	VAR	MEDIA	VAR	MEDIA	VAR	MEDIA	VAR	MEDIA	VAR	MEDIA	VAR	MEDIA	VAR	MEDIA	VAR	BIN
	1.14583	0.10346	4.06015	0.675294	4.0039	0.540116	95.0323	10.3656	124.714	181.357	130.349	114.442	0.413333	0.0127275	1.46353	0.0870564	1.44325	0.0703433	0.3775	0.0100283	1.43812	0.13759	1.49091	0.0695952	0.913333	0.00348406	0.972105	0.00909553	1.03462	0.00105634	14.25	10.1087	48.9248	165.009	51.5844	77.825	0.738375	0.0470968	1.37944	0.0581699	1.40062	0.0279349	0.741583	0.139925	1.45228	0.0687709	1.46821	0.0322945	0
	1.14583	0.10346	4.06015	0.675294	4.0039	0.540116	95.0323	10.3656	124.714	181.357	130.349	114.442	0.413333	0.0127275	1.46353	0.0870564	1.44325	0.0703433	0.3775	0.0100283	1.43812	0.13759	1.49091	0.0695952	0.913333	0.00348406	0.972105	0.00909553	1.03462	0.00105634	14.25	10.1087	48.9248	165.009	51.5844	77.825	0.738375	0.0470968	1.37944	0.0581699	1.40062	0.0279349	0.741583	0.139925	1.45228	0.0687709	1.46821	0.0322945	0
[truncated: 1 more columns]
