# Supplementary material for: On the development of diagnostic support algorithms based on CPET biosignals data via machine learning and wavelets
Source: PeerJ journal article supplement (doi:10.7717/peerj-cs.2474), 2025-01-30
Supplement: raw_data.zip [file Subject07_BxB.xlsx]

## Sheet: Demographics
Gender:	Male
Age:	73
Height (cm):	173
Weight (kg):	62.9
BMI:	21
Condition:	HFrEf

## Sheet: Subject07_BxB
Time	METS		HR		V'O2		V'CO2		RER		V'E		VTex		VTin
min			1/min		L/min		L/min				L/min		L		L
00:00	Rest
01:21
01:37			79
01:53			84
02:08			91
02:24			85
02:40			86
02:56			90
03:12			86
03:27			88
03:43			98
03:59			95
04:15			93
04:31			96
04:46			99
04:49	2.6		96		0.58		0.52		0.89		18		0.929		0.721
04:51	1.3		96		0.28		0.24		0.84		10		0.299		0.288
04:56	1.9		93		0.42		0.37		0.88		13		0.933		1.208
04:59	1.4		90		0.31		0.27		0.87		11		0.609		0.799
05:04	1.5		90		0.33		0.28		0.87		10		0.752		1.074
05:08	1.9		89		0.41		0.36		0.88		13		0.863		0.983
05:12	1.1		89		0.25		0.22		0.86		8		0.618		0.813
05:16	2.8		89		0.62		0.53		0.85		17		0.911		0.911
05:19	0.6		88		0.14		0.11		0.8		4		0.262		0.241
05:23	1.8		88		0.39		0.32		0.81		11		0.698		1.003
05:27	2.2		91		0.48		0.39		0.82		14		0.794		0.95
05:27	Test
05:31	3.4		93		0.76		0.65		0.86		23		1.823		1.979
05:33	1.2		93		0.25		0.21		0.83		9		0.223		0.184
05:37	1.9		92		0.41		0.36		0.87		13		0.796		1
05:41	2		94		0.44		0.38		0.87		13		0.91		1.028
05:45	2.2		96		0.48		0.41		0.85		14		0.837		0.987
05:49	1.7		96		0.38		0.32		0.83		10		0.758		1.019
05:54	3.4		98		0.74		0.63		0.85		21		1.711		1.804
05:58	2.5		99		0.55		0.46		0.84		16		1.086		1.184
06:02	1.8		100		0.4		0.33		0.82		11		0.688		0.96
06:06	4.4		100		0.97		0.82		0.84		27		1.934		2.045
06:11	1.7		100		0.38		0.32		0.83		11		0.857		1.1
06:15	2.5		100		0.56		0.45		0.8		14		0.875		0.866
06:18	2		100		0.45		0.35		0.78		12		0.699		0.996
06:22	2.5		97		0.55		0.41		0.75		13		0.768		0.873
06:26	5.3		98		1.16		0.91		0.78		29		1.991		1.925
06:30	3.1		100		0.68		0.54		0.8		18		1.116		1.373
06:34	3.2		100		0.71		0.57		0.81		18		1.243		1.334
06:38	2.8		101		0.63		0.5		0.8		16		1.035		1.283
06:41	3.2		103		0.7		0.55		0.79		16		1.03		1.11
06:45	4.9		104		1.09		0.86		0.79		27		1.677		1.618
06:49	2.4		104		0.53		0.43		0.81		14		0.812		1.192
06:53	4.3		104		0.95		0.81		0.85		26		1.958		2.114
06:57	3		105		0.67		0.56		0.84		18		1.107		1.23
07:00	3.1		104		0.69		0.57		0.83		18		1.034		1.163
07:04	3.2		104		0.7		0.57		0.82		18		1.047		1.146
07:08	2.4		103		0.54		0.44		0.82		14		0.9		1.121
07:11	3.4		103		0.74		0.59		0.79		17		1.016		1.041
07:14	3.5		103		0.76		0.61		0.8		19		0.945		1.198
07:18	5.1		103		1.12		0.93		0.83		30		1.798		1.814
07:21	3.4		104		0.76		0.63		0.83		21		1.085		1.148
07:24	3.2		104		0.7		0.57		0.82		18		0.955		1.08
07:27	3.4		104		0.76		0.63		0.83		20		1.058		1.224
07:32	4.1		104		0.91		0.78		0.86		24		1.664		1.867
07:35	3.7		105		0.82		0.69		0.85		22		1.112		1.186
07:38	3.8		105		0.84		0.72		0.86		22		1.336		1.422
07:42	3.6		106		0.78		0.67		0.86		20		1.24		1.391
07:45	3		106		0.66		0.56		0.85		18		0.861		1.063
07:47	3.7		106		0.81		0.67		0.83		21		0.96		0.949
07:50	2.9		107		0.63		0.53		0.83		17		0.74		1.012
07:54	5.3		107		1.16		1.02		0.88		32		2.084		1.982
07:57	3.3		108		0.73		0.62		0.85		20		0.937		0.911
08:00	3.4		107		0.76		0.65		0.86		21		1.029		1.171
08:03	4		107		0.87		0.75		0.86		23		1.251		1.312
08:05	3.9		107		0.86		0.73		0.85		25		0.986		1.101
08:09	4.3		108		0.96		0.85		0.89		27		1.8		1.821
08:13	3.6		108		0.79		0.7		0.88		22		1.155		1.219
08:16	3.4		107		0.75		0.66		0.88		20		1.153		1.298
08:19	3		107		0.67		0.58		0.87		19		0.861		1.135
08:21	2.5		107		0.54		0.47		0.86		16		0.705		0.979
08:24	3.4		107		0.74		0.61		0.83		20		0.838		0.591
08:28	5		108		1.09		0.94		0.87		28		1.864		1.99
08:31	3.8		109		0.83		0.72		0.86		22		1.227		1.305
08:35	3.5		109		0.77		0.66		0.86		20		1.179		1.257
08:38	4.1		109		0.91		0.77		0.85		23		1.262		1.259
08:41	3.5		108		0.78		0.65		0.83		20		0.872		0.987
08:45	4.7		109		1.04		0.93		0.89		29		1.992		2.177
08:48	3.6		109		0.79		0.7		0.88		22		1.149		1.233
08:51	4.1		109		0.91		0.8		0.88		25		1.3		1.328
08:54	3.7		109		0.81		0.71		0.88		22		1.154		1.295
08:57	3.4		109		0.74		0.64		0.87		20		1.095		1.278
09:01	4.2		110		0.92		0.8		0.86		24		1.308		1.334
09:04	4.3		111		0.94		0.83		0.87		24		1.427		1.542
09:09	4.7		111		1.03		0.92		0.9		27		2.288		2.176
09:13	4.1		111		0.9		0.82		0.91		26		1.629		1.884
09:16	4.1		111		0.91		0.81		0.9		26		1.218		1.278
09:19	3.6		111		0.79		0.71		0.9		23		1.129		1.271
09:22	3.1		111		0.69		0.61		0.9		19		1.046		1.178
09:25	4		110		0.89		0.78		0.88		23		1.202		1.246
09:28	4		110		0.87		0.76		0.87		23		1.164		1.197
09:31	3.9		110		0.86		0.75		0.87		23		1.114		1.234
09:35	4.9		111		1.07		0.98		0.91		30		1.91		1.996
09:38	3.5		111		0.77		0.68		0.89		22		1.064		1.185
09:41	3.6		111		0.8		0.71		0.89		22		1.18		1.32
09:44	3.9		112		0.86		0.76		0.88		23		1.181		1.284
09:48	4.3		112		0.95		0.85		0.9		25		1.581		1.708
09:51	3.9		114		0.85		0.75		0.89		23		1.236		1.44
09:54	4.3		115		0.95		0.84		0.89		26		1.323		1.382
09:58	4.2		115		0.93		0.83		0.89		25		1.337		1.393
10:01	3.9		116		0.86		0.76		0.89		23		1.178		1.307
10:04	4.1		116		0.91		0.81		0.89		24		1.256		1.345
10:07	4.8		116		1.07		0.98		0.92		30		1.899		2.101
10:10	4.2		117		0.92		0.83		0.9		25		1.159		1.149
10:13	3.8		117		0.83		0.75		0.9		23		1.118		1.268
10:16	4.1		117		0.9		0.81		0.9		24		1.236		1.324
10:21	4.8		118		1.06		0.99		0.93		29		2.138		2.273
10:24	3.7		118		0.81		0.75		0.92		24		1.194		1.318
10:26	3.4		118		0.75		0.66		0.88		21		0.842		0.815
10:29	4.2		118		0.92		0.82		0.89		25		1.141		1.19
10:31	4.9		117		1.08		0.95		0.89		29		1.277		1.268
10:34	4.8		118		1.06		0.94		0.89		28		1.351		1.389
10:37	4.4		118		0.97		0.88		0.9		27		1.322		1.489
10:40	4.1		120		0.9		0.81		0.91		25		1.275		1.489
10:43	4.4		120		0.97		0.88		0.91		27		1.349		1.403
10:46	4.3		121		0.96		0.87		0.91		27		1.293		1.374
10:49	4.7		121		1.04		0.95		0.91		28		1.31		1.349
10:52	4.2		121		0.93		0.86		0.92		26		1.347		1.523
10:55	4.6		120		1		0.93		0.92		29		1.415		1.443
10:58	4		120		0.88		0.82		0.93		25		1.257		1.393
11:01	4.3		120		0.95		0.88		0.93		27		1.349		1.365
11:04	4.4		120		0.97		0.9		0.93		27		1.326		1.41
11:06	4.3		120		0.95		0.87		0.91		27		1.061		1.139
11:09	4.6		120		1.01		0.94		0.93		29		1.393		1.52
11:12	4.4		118		0.97		0.89		0.92		27		1.088		1.123
11:14	3.8		118		0.83		0.77		0.92		25		1.141		1.29
11:17	4.3		118		0.95		0.88		0.93		27		1.339		1.35
11:20	3.1		118		0.68		0.62		0.91		19		1.027		1.263
11:23	4.9		118		1.07		0.97		0.9		29		1.296		1.28
11:26	3.9		117		0.85		0.76		0.9		24		1.091		1.229
11:30	4.5		116		1		0.92		0.92		28		1.653		1.693
11:33	3.5		116		0.77		0.68		0.89		21		1.082		1.206
11:36	3.5		116		0.77		0.67		0.87		20		1.066		1.173
11:39	4.5		116		0.99		0.85		0.86		25		1.233		1.253
11:42	4.4		117		0.96		0.83		0.86		25		1.247		1.406
11:45	4.7		120		1.03		0.9		0.87		27		1.368		1.463
11:48	4.9		120		1.07		0.95		0.89		29		1.465		1.562
11:51	4.5		123		1		0.92		0.92		29		1.608		1.757
11:54	4.4		123		0.97		0.88		0.91		28		1.43		1.514
11:58	4.6		123		1.01		0.95		0.94		28		1.805		1.979
12:02	3.8		125		0.84		0.75		0.9		22		1.218		1.243
12:05	3.7		125		0.82		0.73		0.89		21		1.166		1.359
12:08	3.8		125		0.84		0.73		0.87		21		1.108		1.201
12:11	3.7		125		0.82		0.71		0.87		22		1.144		1.458
12:14	5.8		125		1.27		1.11		0.87		32		1.632		1.615
12:17	4.4		125		0.97		0.85		0.88		25		1.209		1.298
12:20	3.9		126		0.87		0.76		0.88		23		1.24		1.451
12:23	4.5		126		0.98		0.86		0.87		25		1.227		1.316
12:26	4.6		127		1.02		0.88		0.87		26		1.143		1.198
12:28	4.4		127		0.96		0.84		0.87		27		0.966		1.189
12:31	5.9		127		1.31		1.18		0.91		35		1.931		1.957
12:34	4.7		127		1.02		0.95		0.93		29		1.456		1.579
12:37	5.8		127		1.28		1.19		0.93		35		1.689		1.666
12:40	4		126		0.87		0.83		0.95		27		1.255		1.673
12:44	4.9		126		1.08		1.05		0.98		31		1.947		1.948
12:47	4.3		125		0.94		0.9		0.95		26		1.406		1.485
12:50	4.6		125		1		0.93		0.93		27		1.372		1.409
12:53	4.9		125		1.07		0.99		0.93		29		1.493		1.594
12:56	4.8		126		1.06		0.98		0.93		29		1.379		1.526
12:59	4.6		129		1.02		0.95		0.93		28		1.437		1.596
13:03	5.4		129		1.19		1.14		0.96		34		1.907		2.022
13:05	3.9		130		0.86		0.82		0.95		26		1.119		1.32
13:08	4.8		130		1.06		0.99		0.94		29		1.281		1.249
13:10	5.2		130		1.14		1.06		0.93		32		1.281		1.314
13:14	5.3		130		1.17		1.14		0.98		36		2.014		2.165
13:17	4.7		131		1.04		1.01		0.97		31		1.566		1.634
13:20	4.4		130		0.96		0.92		0.96		28		1.349		1.43
13:22	4.3		130		0.95		0.9		0.95		28		1.182		1.371
13:25	5.4		130		1.2		1.12		0.94		33		1.43		1.392
13:27	4.7		130		1.02		0.97		0.94		30		1.301		1.52
13:30	5.3		130		1.17		1.14		0.98		35		1.799		1.994
13:33	4.5		130		0.99		0.96		0.98		30		1.555		1.71
13:36	4.2		129		0.94		0.89		0.95		29		1.047		1.168
13:38	4.1		129		0.9		0.84		0.94		27		0.974		1.077
13:41	5.8		129		1.28		1.24		0.97		38		2.029		2.083
13:43	4.7		129		1.04		0.99		0.96		32		1.286		1.409
13:46	4.8		129		1.05		1		0.95		31		1.369		1.441
13:49	4.6		129		1.02		0.97		0.95		30		1.394		1.53
13:52	4.8		130		1.05		1		0.95		30		1.389		1.415
13:54	4.8		131		1.05		0.99		0.95		30		1.346		1.532
13:57	5.1		131		1.12		1.06		0.95		32		1.383		1.442
14:00	4.7		133		1.03		0.97		0.94		29		1.332		1.431
14:02	4.9		133		1.09		1.02		0.94		31		1.341		1.435
14:07	4.9		134		1.08		1.06		0.98		30		2.329		2.373
14:11	4.3		134		0.94		0.91		0.96		25		1.642		2.058
14:13	5.6		134		1.24		1.17		0.94		35		1.406		1.519
14:15	4.8		134		1.05		1		0.95		32		1.24		1.497
14:18	4.8		134		1.07		1.03		0.96		33		1.256		1.37
14:19	1.8		133		0.39		0.36		0.93		17		0.439		0.969
14:22	7.1		133		1.57		1.49		0.95		42		2.191		1.537
14:24	4.6		134		1		0.95		0.95		32		1.116		1.509
14:26	6.2		134		1.37		1.3		0.95		43		1.32		1.449
14:29	6.6		134		1.46		1.45		0.99		47		2.133		2.055
14:31	5		134		1.11		1.1		0.99		37		1.281		1.427
14:33	4.5		134		0.98		0.97		0.99		32		1.257		1.346
14:36	4.6		136		1.01		0.99		0.98		31		1.256		1.397
14:38	4.7		136		1.04		1.02		0.98		31		1.354		1.449
14:41	4.5		136		1		0.95		0.96		31		1.112		1.289
14:43	4.9		136		1.07		1.02		0.96		32		1.202		1.349
14:46	6.2		137		1.37		1.33		0.97		41		1.861		1.843
14:48	4.5		137		1		0.96		0.96		31		1.155		1.322
14:50	5.4		139		1.19		1.15		0.97		36		1.447		1.504
14:53	4.9		139		1.09		1.07		0.98		35		1.671		1.709
14:57	5.7		141		1.26		1.26		1		38		2.325		2.295
15:00	4.6		141		1.02		1.03		1.01		32		1.688		2.085
15:02	4		141		0.87		0.87		0.99		28		1.169		1.343
15:05	3.6		141		0.79		0.77		0.98		25		1.214		1.35
15:07	5.4		141		1.18		1.1		0.93		33		1.128		1.09
15:10	5.6		141		1.24		1.17		0.94		35		1.515		1.561
15:12	7		141		1.54		1.48		0.96		47		1.922		2.022
15:15	5.5		139		1.22		1.17		0.97		38		1.389		1.467
15:16	5.9		139		1.3		1.23		0.95		43		1.226		1.338
15:18	5.7		139		1.27		1.24		0.98		42		1.371		1.521
15:20	4.6		139		1.02		1.01		0.99		34		1.222		1.385
15:23	4.5		139		1		0.99		0.99		34		1.234		1.476
15:25	5.4		139		1.19		1.19		1		38		1.506		1.467
15:27	5.1		139		1.12		1.11		0.99		36		1.361		1.493
15:29	4.1		139		0.9		0.87		0.96		30		0.855		1.006
15:32	4.6		139		1.02		1.02		1		32		1.578		1.735
15:35	5.6		141		1.24		1.19		0.96		36		1.512		1.446
15:37	5.5		141		1.2		1.14		0.95		35		1.383		1.499
15:39	5.2		141		1.16		1.09		0.94		35		1.248		1.425
15:41	5.7		144		1.26		1.18		0.94		37		1.407		1.459
15:44	5.8		144		1.29		1.21		0.94		38		1.421		1.462
15:46	5.7		146		1.25		1.19		0.95		37		1.364		1.556
15:48	5.8		146		1.29		1.23		0.96		37		1.524		1.559
15:51	6.1		150		1.34		1.31		0.97		41		1.61		1.716
15:53	5.9		150		1.3		1.29		1		42		1.506		1.665
15:55	5.9		151		1.3		1.31		1.01		42		1.529		1.536
15:57	5.9		151		1.31		1.34		1.02		42		1.559		1.655
16:00	5.5		153		1.21		1.26		1.04		40		1.68		1.876
16:02	4.9		153		1.08		1.11		1.03		36		1.355		1.563
16:04	5.7		155		1.26		1.3		1.04		39		1.506		1.565
16:06	6.4		155		1.4		1.45		1.03		44		1.59		1.559
16:09	6		155		1.32		1.37		1.04		43		1.489		1.624
16:11	6.1		155		1.33		1.39		1.04		43		1.538		1.681
16:13	5.9		155		1.3		1.36		1.04		43		1.516		1.627
16:15	6.4		157		1.42		1.49		1.05		47		1.475		1.617
16:17	5.4		157		1.19		1.27		1.07		42		1.398		1.707
16:19	5.8		157		1.27		1.35		1.06		42		1.574		1.564
16:21	7.4		160		1.64		1.76		1.07		53		2.069		2.001
16:23	7.2		160		1.59		1.7		1.07		54		1.59		1.681
16:25	6.6		160		1.46		1.6		1.09		54		1.68		1.83
16:27	6.9		160		1.52		1.69		1.11		55		1.677		1.796
16:28	6.6		160		1.45		1.63		1.12		57		1.649		1.845
16:31	4.9		162		1.09		1.23		1.13		41		1.453		1.66
16:33	6.2		162		1.37		1.57		1.15		47		2.2		2.214
16:35	5.6		162		1.23		1.39		1.13		45		1.467		1.76
16:37	6.8		162		1.51		1.67		1.11		52		1.392		1.362
16:39	7.4		162		1.64		1.84		1.12		60		1.676		1.752
16:40	6.4		162		1.41		1.61		1.14		57		1.449		1.68
16:42	4.7		162		1.03		1.19		1.16		46		1.071		1.57
16:42	Recovery
16:43	5.9		164		1.31		1.49		1.14		48		1.396		1.196
16:45	8		164		1.77		2		1.13		60		1.671		1.603
16:47	6.8		164		1.49		1.72		1.15		61		1.62		1.787
16:48	6.9		164		1.51		1.74		1.15		58		1.684		1.7
16:50	6.9		164		1.51		1.78		1.18		61		1.855		1.946
16:51	4.6		164		1.02		1.23		1.21		52		1.153		1.701
16:53	4.2		164		0.93		1.14		1.22		40		1.348		1.385
16:55	4.7		164		1.04		1.23		1.18		45		1.025		1.254
16:56	7.7		164		1.69		1.96		1.16		60		1.538		1.128
16:58	7.5		164		1.64		1.95		1.19		66		1.694		1.879
17:00	5.9		162		1.31		1.58		1.21		58		1.677		1.847
17:01	6.7		162		1.47		1.77		1.2		63		1.619		1.663
17:03	6.4		162		1.41		1.73		1.23		63		1.621		1.704
17:05	5.7		160		1.26		1.55		1.23		50		1.577		1.6
17:06	6.4		160		1.41		1.74		1.23		63		1.554		1.719
17:08	6.9		160		1.52		1.89		1.24		64		1.816		1.814
17:10	6		160		1.33		1.66		1.25		57		1.727		1.902
17:11	6.4		160		1.4		1.76		1.25		61		1.721		1.878
17:13	6.4		160		1.4		1.78		1.27		63		1.667		1.772
17:14	6.5		160		1.44		1.85		1.28		65		1.678		1.733
17:16	5.7		160		1.26		1.64		1.3		57		1.645		1.863
17:18	4.6		160		1.01		1.3		1.29		45		1.591		1.757
17:20	5.9		160		1.29		1.66		1.28		56		1.651		1.749
17:22	6.8		160		1.49		1.9		1.28		65		1.862		1.842
17:23	4.9		160		1.07		1.38		1.29		52		1.439		1.771
17:25	5.6		157		1.24		1.58		1.27		56		1.428		1.346
17:27	5.1		157		1.11		1.43		1.29		50		1.433		1.59
17:28	6		157		1.31		1.66		1.26		56		1.519		1.523
17:31	5.7		157		1.25		1.63		1.31		54		2.021		2.223
17:32	3.9		157		0.87		1.14		1.32		46		1.271		1.75
17:34	4.1		157		0.9		1.16		1.29		39		1.363		1.379
17:37	6.5		157		1.43		1.84		1.29		57		2.134		2.076
17:39	4		157		0.89		1.12		1.26		38		1.484		1.626
17:41	5.1		155		1.12		1.4		1.25		44		1.712		1.752
17:44	4.7		153		1.02		1.3		1.27		40		2.107		2.396
17:46	4.5		153		0.98		1.21		1.23		40		1.318		1.374
17:49	4.2		153		0.93		1.13		1.21		37		1.407		1.533
17:51	4.5		151		0.98		1.2		1.22		34		1.566		1.834
17:53	6.1		151		1.34		1.59		1.18		49		1.68		1.543
17:56	5.2		151		1.14		1.41		1.23		48		2.097		2.344
17:59	4.2		151		0.93		1.14		1.22		37		1.756		1.72
18:02	2.9		150		0.63		0.77		1.22		26		1.327		1.913
18:04	4		146		0.87		1.05		1.2		35		1.317		1.458
18:07	4.6		146		1.02		1.2		1.18		36		1.457		1.317
18:10	3.8		142		0.83		0.97		1.18		30		1.5		1.609
18:13	3		142		0.67		0.79		1.18		26		1.25		1.707
18:16	3.7		139		0.81		0.95		1.18		28		1.365		1.304
18:19	3.3		139		0.73		0.87		1.19		27		1.404		1.685
18:22	4.5		136		0.99		1.18		1.18		34		1.697		1.49
18:25	2.9		133		0.65		0.79		1.23		25		1.459		1.812
18:29	3.6		133		0.78		0.96		1.23		29		1.726		1.616
18:33	2.5		130		0.56		0.7		1.25		22		1.41		1.742
18:37	3.1		129		0.69		0.85		1.24		26		1.607		1.489
18:40	3.2		127		0.7		0.88		1.24		26		1.607		1.634
18:44	3		127		0.66		0.84		1.28		26		1.486		1.696
18:47	3.9		126		0.86		1.1		1.29		35		1.731		1.633
18:49	1.9		125		0.42		0.56		1.32		22		0.937		1.418
18:53	1.7		125		0.37		0.5		1.34		18		1.102		1.259
19:08			126
19:24			122
19:40			114
19:56			107
20:11			108
20:27			104
20:43			105
20:59			111
21:14			108
21:30			108
21:46			108
22:01			103
22:17			107
22:33			117
	4.56215	1.52159	128.715	399.633	1.0049	0.0739233	1.00542	0.130611	0.984931	0.0207624	32.0764	155.019	1.38495	0.113859	1.49596	0.104847
	METS						HR						VO2						VCO2						RER						VE						Vtex						Vtin						LABEL
	Rest		Test		Recovery		Rest		Test		Recovery		Rest		Test		Recovery		Rest		Test		Recovery		Rest		Test		Recovery		Rest		Test		Recovery		Rest		Test		Recovery		Rest		Test		Recovery
	MEDIA	VAR	MEDIA	VAR	MEDIA	VAR	MEDIA	VAR	MEDIA	VAR	MEDIA	VAR	MEDIA	VAR	MEDIA	VAR	MEDIA	VAR	MEDIA	VAR	MEDIA	VAR	MEDIA	VAR	MEDIA	VAR	MEDIA	VAR	MEDIA	VAR	MEDIA	VAR	MEDIA	VAR	MEDIA	VAR	MEDIA	VAR	MEDIA	VAR	MEDIA	VAR	MEDIA	VAR	MEDIA	VAR	MEDIA	VAR	BIN
	1.73636	0.420545	4.45435	1.28319	4.98966	2.27322	90.375	22.7663	123.952	304.561	143.931	403.643	0.382727	0.0202018	0.981522	0.0627029	1.09759	0.109352	0.328182	0.0156964	0.918391	0.0869437	1.35052	0.156594	0.851818	0.000936364	0.92213	0.00573562	1.23397	0.00247698	11.7273	15.6182	28.7348	88.7896	45.3276	200.084	0.697091	0.0556921	1.3407	0.118073	1.56047	0.0596775	0.817364	0.0928779	1.45153	0.105362	1.67214	0.0650689	0
	1.73636	0.420545	4.45435	1.28319	4.98966	2.27322	90.375	22.7663	123.952	304.561	143.931	403.643	0.382727	0.0202018	0.981522	0.0627029	1.09759	0.109352	0.328182	0.0156964	0.918391	0.0869437	1.35052	0.156594	0.851818	0.000936364	0.92213	0.00573562	1.23397	0.00247698	11.7273	15.6182	28.7348	88.7896	45.3276	200.084	0.697091	0.0556921	1.3407	0.118073	1.56047	0.0596775	0.817364	0.0928779	1.45153	0.105362	1.67214	0.0650689	0
[truncated: 1 more columns]
