# Supplementary material for: On the development of diagnostic support algorithms based on CPET biosignals data via machine learning and wavelets
Source: PeerJ journal article supplement (doi:10.7717/peerj-cs.2474), 2025-01-30
Supplement: raw_data.zip [file Subject08_BxB.xlsx]

## Sheet: Demographics
Gender:	Male
Age:	85
Height (cm):	160
Weight (kg):	77.3
BMI:	30
Condition:	HFrEf

## Sheet: Subject08_BxB
Time	METS		HR		V'O2		V'CO2		RER		V'E		VTex		VTin
min			1/min		L/min		L/min				L/min		L		L
00:00	Rest
00:22									0.97				0.477
00:24	1.3		74		0.35		0.32		0.92		13		0.489		0.689
00:27	1		73		0.28		0.27		0.94		11		0.485		0.62
00:29	1.3		73		0.36		0.34		0.94		14		0.529		0.522
00:31	1.1		73		0.31		0.3		0.95		12		0.483		0.536
00:33	1.2		73		0.33		0.31		0.96		13		0.481		0.53
00:36	1.2		73		0.34		0.33		0.97		14		0.53		0.569
00:38	1		73		0.26		0.25		0.98		11		0.47		0.519
00:41	1.1		73		0.3		0.29		0.96		11		0.533		0.449
00:43	0.8		73		0.23		0.21		0.9		9		0.266		0.243
00:46	1.1		73		0.3		0.28		0.92		11		0.514		0.452
00:48	1.6		73		0.43		0.38		0.9		14		0.52		0.524
00:50	1		73		0.27		0.25		0.93		11		0.409		0.684
00:53	2		73		0.55		0.5		0.91		17		0.915		0.511
00:56	1.2		73		0.33		0.31		0.92		13		0.501		0.651
00:58	1.3		73		0.35		0.32		0.91		13		0.398		0.396
01:00	1.6		73		0.43		0.4		0.93		16		0.519		0.572
01:00	Test
01:02	1.6		73		0.43		0.42		0.97		16		0.643		0.761
01:04	1.5		73		0.4		0.39		0.97		15		0.59		0.648
01:07	1.5		73		0.4		0.38		0.97		15		0.593		0.642
01:09	1.7		73		0.45		0.43		0.96		17		0.577		0.579
01:11	1.6		73		0.42		0.41		0.96		16		0.598		0.665
01:13	1.7		73		0.47		0.45		0.96		17		0.65		0.657
01:15	1.7		73		0.46		0.44		0.97		17		0.639		0.671
01:18	1.8		73		0.48		0.45		0.94		17		0.585		0.545
01:19	1.4		74		0.38		0.35		0.93		14		0.427		0.494
01:21	1.5		74		0.4		0.36		0.9		14		0.428		0.404
01:23	1.7		74		0.45		0.41		0.9		15		0.537		0.531
01:27	2.1		75		0.56		0.5		0.89		17		0.993		0.896
01:29	2		75		0.53		0.47		0.89		17		0.636		0.709
01:31	2		78		0.53		0.48		0.9		18		0.652		0.784
01:33	2		78		0.55		0.49		0.89		18		0.68		0.725
01:36	2.1		82		0.57		0.51		0.9		19		0.753		0.862
01:38	2		82		0.55		0.49		0.9		18		0.715		0.742
01:41	2.1		86		0.56		0.5		0.89		18		0.745		0.823
01:43	2.6		86		0.71		0.63		0.88		22		1.032		1.05
01:46	2.1		89		0.58		0.52		0.89		19		0.85		0.949
01:49	2.3		89		0.63		0.56		0.88		20		0.838		0.854
01:51	2.4		91		0.64		0.56		0.87		21		0.82		0.931
01:53	2.7		91		0.73		0.63		0.87		23		0.87		0.897
01:56	2.8		93		0.75		0.64		0.86		22		0.886		0.868
01:58	2.9		93		0.77		0.67		0.87		25		0.98		1.119
02:01	2.5		93		0.68		0.59		0.86		21		0.852		0.804
02:03	2.6		93		0.71		0.61		0.86		21		0.942		0.967
02:06	2.7		94		0.73		0.62		0.85		22		0.915		0.977
02:08	2.8		94		0.75		0.64		0.85		23		0.9		1.013
02:10	2.8		95		0.76		0.65		0.85		23		0.881		0.952
02:13	2.8		95		0.77		0.65		0.84		24		0.839		0.934
02:15	2.8		95		0.75		0.63		0.84		23		0.862		0.913
02:17	2.9		95		0.78		0.66		0.85		24		0.944		1.027
02:19	2.9		95		0.79		0.66		0.84		23		0.871		0.947
02:22	3		95		0.81		0.68		0.84		24		0.944		1.012
02:24	3.1		95		0.85		0.73		0.86		26		1.142		1.278
02:27	2.9		95		0.79		0.67		0.85		24		0.968		0.977
02:29	2.8		95		0.76		0.64		0.84		24		0.839		0.976
02:31	3		95		0.81		0.69		0.85		25		0.961		0.939
02:34	2.7		95		0.74		0.63		0.85		23		0.84		0.956
02:36	2.9		95		0.77		0.66		0.85		23		1.013		1.07
02:39	2.7		95		0.73		0.61		0.84		21		0.844		0.92
02:41	2.7		95		0.73		0.61		0.83		21		0.838		0.929
02:44	3.2		95		0.87		0.72		0.82		24		1.063		1.024
02:46	3.1		95		0.85		0.7		0.82		24		0.987		1.1
02:48	3.2		95		0.87		0.71		0.82		25		0.934		1.026
02:51	3.3		95		0.9		0.76		0.84		27		1.145		1.239
02:53	3.1		95		0.83		0.71		0.86		26		1.076		1.244
02:56	3.1		95		0.85		0.72		0.85		25		1.001		1.008
02:58	2.9		95		0.77		0.65		0.84		23		0.891		0.993
03:01	3.3		95		0.89		0.74		0.84		25		1.055		1.066
03:03	3.2		95		0.87		0.72		0.84		25		0.973		1.001
03:05	2.4		95		0.66		0.55		0.83		20		0.73		0.943
03:08	2.4		95		0.65		0.52		0.81		18		0.801		0.164
03:10	3.6		95		0.97		0.78		0.8		26		0.913		1.703
03:12	3.3		95		0.89		0.72		0.81		23		0.982		1.001
03:15	3.6		95		0.97		0.81		0.83		27		1.233		1.378
03:18	3.6		95		0.98		0.83		0.84		28		1.307		1.283
03:20	3.8		95		1.03		0.87		0.85		31		1.206		1.31
03:23	3.2		95		0.86		0.76		0.88		27		1.162		1.298
03:25	3.3		95		0.9		0.8		0.89		28		1.31		1.367
03:28	3.2		95		0.85		0.77		0.9		28		1.121		1.344
03:30	3.4		95		0.93		0.83		0.9		29		1.167		1.198
03:33	3.3		95		0.9		0.8		0.89		27		1.126		1.17
03:35	3.5		95		0.95		0.84		0.88		30		1.111		1.181
03:37	3.4		95		0.93		0.82		0.88		28		1.097		1.135
03:40	3.2		95		0.86		0.77		0.9		27		1.104		1.25
03:42	3.4		95		0.92		0.82		0.88		28		1.128		1.119
03:44	3.4		96		0.91		0.82		0.9		29		1.138		1.294
03:47	3.6		96		0.98		0.88		0.9		31		1.239		1.269
03:49	3.1		95		0.85		0.78		0.91		28		1.114		1.259
03:52	3.1		95		0.84		0.76		0.9		28		1.062		1.114
03:54	3.5		95		0.93		0.84		0.9		30		1.116		1.145
03:56	3.5		95		0.93		0.85		0.91		30		1.185		1.232
03:58	3.4		95		0.91		0.82		0.9		30		1.078		1.19
04:00	3.3		95		0.88		0.8		0.91		29		1.031		1.145
04:03	3.5		95		0.93		0.84		0.9		30		1.073		1.08
04:05	3.4		95		0.92		0.83		0.91		29		1.173		1.236
04:07	3.2		95		0.86		0.77		0.89		26		1.086		1.144
04:10	3		95		0.82		0.74		0.9		26		1.076		1.227
04:12	3.1		95		0.85		0.75		0.89		26		1.053		1.128
04:15	3.6		95		0.98		0.85		0.86		28		1.172		1.082
04:18	3.4		95		0.91		0.8		0.88		25		1.391		1.436
04:21	3.2		96		0.86		0.75		0.87		25		1.1		1.265
04:23	3.5		96		0.96		0.84		0.87		28		1.13		1.206
04:25	3.5		101		0.96		0.84		0.88		30		1.103		1.214
04:28	3.5		101		0.95		0.85		0.89		30		1.167		1.249
04:31	3		100		0.8		0.7		0.87		23		1.249		1.158
04:33	4		100		1.09		0.94		0.86		30		1.243		1.232
04:36	3.6		95		0.97		0.84		0.87		29		1.188		1.383
04:39	3.6		95		0.97		0.85		0.88		29		1.245		1.276
04:41	3.4		95		0.91		0.81		0.89		27		1.23		1.374
04:44	3.7		95		0.99		0.88		0.89		30		1.179		1.288
04:46	3.8		95		1.02		0.92		0.9		31		1.247		1.296
04:48	3.8		95		1.03		0.93		0.9		32		1.306		1.361
04:51	3.3		95		0.91		0.83		0.91		29		1.147		1.309
04:53	3.3		95		0.9		0.82		0.92		29		1.213		1.338
04:56	3.7		95		1		0.92		0.91		31		1.19		1.246
04:58	3.4		95		0.91		0.83		0.92		29		1.121		1.216
05:00	3.3		95		0.9		0.81		0.9		28		1.043		1.077
05:02	3.4		95		0.93		0.84		0.9		29		1.078		1.143
05:05	3.3		95		0.88		0.79		0.9		27		1.053		1.159
05:07	3.3		95		0.89		0.79		0.89		27		1.038		1.093
05:09	3.8		95		1.04		0.92		0.89		31		1.179		1.203
05:12	3.3		95		0.9		0.81		0.9		27		1.128		1.278
05:14	3.8		95		1.02		0.91		0.89		31		1.159		1.199
05:17	3.7		95		1.01		0.91		0.9		31		1.297		1.383
05:19	3.6		95		0.99		0.9		0.92		31		1.246		1.356
05:21	3.6		95		0.99		0.91		0.92		31		1.216		1.297
05:24	3.6		95		0.98		0.91		0.93		32		1.227		1.393
05:26	3.8		95		1.04		0.97		0.93		34		1.257		1.308
05:28	3.5		95		0.94		0.88		0.94		31		1.216		1.303
05:31	3.5		95		0.95		0.9		0.95		31		1.317		1.402
05:33	3.6		95		0.96		0.91		0.94		32		1.223		1.38
05:36	3.3		95		0.9		0.85		0.95		30		1.226		1.287
05:38	3.3		95		0.9		0.84		0.93		29		1.199		1.26
05:41	3.6		95		0.98		0.91		0.93		31		1.291		1.366
05:43	3.3		95		0.88		0.82		0.93		29		1.177		1.321
05:46	3.5		95		0.95		0.87		0.92		29		1.211		1.256
05:48	3.8		95		1.04		0.94		0.91		31		1.282		1.312
05:53	3.6		96		0.96		0.89		0.92		27		2.063		2.062
05:55	3.5		96		0.95		0.85		0.9		29		1.253		1.52
05:57	3.8		96		1.03		0.94		0.91		33		1.202		1.292
06:00	3.8		96		1.02		0.92		0.91		32		1.156		1.213
06:02	3.7		96		1.01		0.91		0.9		31		1.101		1.167
06:04	3.7		96		1.01		0.91		0.91		31		1.099		1.127
06:06	4.1		95		1.1		1.01		0.91		34		1.311		1.37
06:08	3.9		95		1.05		0.97		0.92		34		1.24		1.353
06:11	3.7		95		1.01		0.94		0.93		33		1.219		1.291
06:13	3.7		95		1		0.93		0.93		32		1.251		1.296
06:15	3.6		95		0.96		0.9		0.94		32		1.204		1.341
06:18	3.9		95		1.06		0.98		0.93		33		1.323		1.259
06:20	3.6		95		0.97		0.89		0.92		31		1.089		1.223
06:22	3.8		95		1.04		0.96		0.93		33		1.126		1.226
06:24	3.9		95		1.06		0.99		0.93		34		1.26		1.263
06:26	3.7		95		0.99		0.92		0.93		31		1.095		1.177
06:28	3.6		95		0.96		0.89		0.92		30		1.056		1.162
06:31	4.1		95		1.1		1.02		0.93		34		1.308		1.331
06:33	3.7		95		1		0.94		0.94		33		1.294		1.44
06:35	3.8		95		1.02		0.96		0.94		33		1.234		1.316
06:37	3.8		95		1.04		0.99		0.95		35		1.222		1.309
06:40	4		95		1.08		1.03		0.96		35		1.39		1.384
06:42	3.6		95		0.99		0.95		0.96		31		1.468		1.528
06:45	3.3		95		0.88		0.85		0.96		28		1.372		1.595
06:48	3.6		95		0.98		0.92		0.94		31		1.164		1.259
06:50	3.6		101		0.97		0.92		0.94		31		1.179		1.265
06:52	4		101		1.09		1.02		0.93		34		1.306		1.287
06:54	3.9		101		1.06		0.99		0.94		34		1.307		1.408
06:56	3.8		101		1.04		0.97		0.94		34		1.127		1.264
06:59	3.7		101		1.01		0.95		0.94		33		1.158		1.18
07:01	4		96		1.07		1.02		0.95		35		1.253		1.331
07:03	3.7		96		0.99		0.94		0.95		34		1.129		1.262
07:05	3.8		95		1.01		0.95		0.94		31		1.374		1.248
07:08	3.8		95		1.04		0.98		0.94		33		1.212		1.379
07:10	3.9		96		1.05		0.99		0.94		34		1.203		1.306
07:12	3.8		96		1.03		0.97		0.94		34		1.247		1.319
07:14	3.9		97		1.05		1		0.96		35		1.319		1.485
07:16	3.9		97		1.07		1.03		0.96		36		1.31		1.357
07:19	3.8		97		1.03		1		0.97		35		1.282		1.424
07:21	3.8		96		1.02		0.99		0.97		34		1.293		1.363
07:23	3.6		96		0.97		0.94		0.98		33		1.197		1.381
07:25	4		95		1.08		1.04		0.97		36		1.35		1.352
07:28	3.9		95		1.06		1.03		0.97		35		1.381		1.428
07:30	3.9		95		1.06		1.04		0.97		36		1.433		1.536
07:32	3.7		95		0.99		0.97		0.98		33		1.337		1.452
07:35	3.7		95		0.99		0.96		0.97		32		1.315		1.383
07:37	3.6		95		0.96		0.93		0.96		31		1.232		1.369
07:40	3.6		95		0.98		0.94		0.96		32		1.218		1.36
07:42	4.1		95		1.1		1.04		0.95		34		1.45		1.354
07:44	3.6		95		0.99		0.93		0.95		33		1.131		1.412
07:46	3.8		95		1.03		0.97		0.94		33		1.119		1.145
07:48	3.8		95		1.02		0.97		0.95		34		1.144		1.268
07:50	4.2		95		1.13		1.08		0.95		37		1.288		1.351
07:53	4.1		95		1.1		1.06		0.97		36		1.366		1.43
07:55	3.7		96		1		0.97		0.97		34		1.228		1.368
07:57	4		96		1.07		1.05		0.98		36		1.31		1.395
07:59	3.6		96		0.98		0.95		0.97		33		1.247		1.363
08:02	3.9		96		1.06		1.04		0.98		36		1.385		1.434
08:04	3.9		96		1.06		1.04		0.98		36		1.329		1.461
08:06	3.8		95		1.03		1.01		0.98		35		1.265		1.369
08:08	3.5		95		0.94		0.93		0.99		32		1.241		1.392
08:11	4		95		1.07		1.06		0.98		36		1.412		1.436
08:13	3.9		95		1.04		1.03		0.98		36		1.352		1.478
08:15	3.9		95		1.05		1.04		0.99		35		1.412		1.476
08:17	3.9		95		1.06		1.05		0.99		37		1.307		1.424
08:20	3.1		96		0.85		0.84		0.99		31		1.499		1.523
08:22	4.1		96		1.12		1.05		0.94		34		1.212		1.202
08:25	4		95		1.09		1.03		0.94		35		1.315		1.404
08:27	3.8		95		1.03		0.97		0.94		33		1.317		1.315
08:29	4.1		96		1.11		1.06		0.95		36		1.354		1.475
08:32	4		96		1.07		1.02		0.95		33		1.404		1.384
08:34	3.6		96		0.96		0.93		0.97		32		1.433		1.679
08:36	3.6		96		0.98		0.94		0.96		34		1.057		1.219
08:38	3.2		96		0.86		0.83		0.96		30		1.001		1.181
08:40	3.7		95		1		0.95		0.96		33		1.122		1.217
08:42	3.2		95		0.86		0.82		0.95		30		0.992		1.196
08:44	4.2		95		1.13		1.04		0.92		33		1.107		0.932
08:47	3.6		95		0.97		0.92		0.94		31		1.211		1.406
08:49	3.4		95		0.92		0.86		0.94		31		1.038		1.225
08:51	4		95		1.08		1		0.93		35		1.15		1.239
08:53	4.1		95		1.11		1.03		0.93		34		1.279		1.193
08:55	4.2		95		1.15		1.07		0.93		36		1.334		1.434
08:57	3.6		95		0.96		0.91		0.95		33		1.103		1.348
08:59	3.8		95		1.04		0.99		0.95		35		1.273		1.23
09:02	4.4		95		1.19		1.13		0.95		38		1.384		1.443
09:04	4.3		95		1.15		1.12		0.97		39		1.427		1.535
09:06	4.1		95		1.11		1.08		0.97		39		1.399		1.537
09:08	4		95		1.09		1.08		0.99		39		1.399		1.485
09:10	4		95		1.08		1.09		1		39		1.395		1.486
09:13	3.5		95		0.96		0.97		1.01		35		1.358		1.533
09:15	4.2		95		1.13		1.13		1		40		1.373		1.452
09:17	3.9		95		1.07		1.08		1.01		38		1.439		1.508
09:19	3.7		95		1		1.01		1.01		37		1.349		1.544
09:21	3.8		95		1.03		1.04		1.01		37		1.369		1.466
09:23	3.9		95		1.07		1.08		1.01		39		1.31		1.454
09:25	4.1		95		1.11		1.12		1.01		40		1.4		1.449
09:28	3.9		95		1.06		1.09		1.02		39		1.412		1.547
09:30	3.8		95		1.03		1.06		1.03		38		1.338		1.491
09:32	4		95		1.07		1.1		1.02		40		1.302		1.374
09:34	3.5		95		0.95		0.98		1.03		37		1.232		1.429
09:36	3.9		95		1.05		1.06		1.01		38		1.351		1.356
09:38	4		95		1.08		1.1		1.02		40		1.384		1.532
09:40	3.8		95		1.03		1.05		1.02		39		1.246		1.385
09:42	3.7		95		1.01		1.03		1.02		36		1.449		1.442
09:44	3.7		95		0.99		1.01		1.02		37		1.302		1.517
09:46	3.4		95		0.91		0.91		1		33		1.095		1.204
09:48	3.9		95		1.04		1.04		1		38		1.22		1.354
09:50	4		95		1.09		1.08		0.98		38		1.151		1.168
09:52	4.2		95		1.13		1.14		1		40		1.542		1.67
09:54	3.4		95		0.93		0.96		1.03		39		1.112		1.577
09:56	3.7		95		0.99		1.02		1.03		42		0.926		1.072
09:57	3.3		95		0.9		0.95		1.06		39		1.011		1.274
10:00	3.6		95		0.98		0.94		0.96		31		1.497		0.843
10:02	5		95		1.34		1.3		0.97		46		1.277		1.462
10:04	4.9		95		1.32		1.27		0.96		42		1.353		1.14
10:05	4.2		95		1.13		1.1		0.98		41		1.043		1.352
10:07	4.8		95		1.29		1.27		0.98		46		1.187		1.123
10:09	4.3		95		1.17		1.18		1.01		44		1.349		1.407
10:10	4.3		95		1.18		1.2		1.02		45		1.35		1.476
10:12	4.1		95		1.11		1.13		1.02		43		1.28		1.348
10:14	3.8		95		1.04		1.05		1.02		38		1.321		1.354
10:16	4.2		95		1.13		1.15		1.02		43		1.259		1.442
10:18	4.5		95		1.22		1.25		1.03		48		1.394		1.424
10:19	4		95		1.09		1.12		1.03		43		1.234		1.352
10:21	4.3		95		1.17		1.22		1.05		47		1.29		1.407
10:23	4.3		95		1.16		1.23		1.06		49		1.357		1.489
10:24	4.4		95		1.18		1.26		1.07		51		1.223		1.269
10:26	4.3		95		1.17		1.26		1.08		50		1.351		1.354
10:27	3.4		95		0.93		0.99		1.06		38		1.071		1.187
10:29	3.8		95		1.02		1.08		1.06		41		1.183		1.356
10:31	4.1		95		1.12		1.18		1.06		46		1.169		1.295
10:32	4.8		95		1.29		1.36		1.05		51		1.276		1.2
10:34	3.2		95		0.87		0.93		1.06		34		1.266		1.462
10:36	4.4		95		1.18		1.24		1.04		45		1.432		1.376
10:38	4		95		1.08		1.13		1.05		44		1.286		1.464
10:40	4.4		95		1.18		1.24		1.05		49		1.305		1.34
10:42	4		95		1.08		1.12		1.04		42		1.354		1.306
10:43	4.2		95		1.13		1.19		1.05		45		1.406		1.473
10:45	4		95		1.08		1.14		1.05		44		1.307		1.454
10:47	4.1		95		1.11		1.17		1.06		46		1.331		1.429
10:49	4.2		95		1.15		1.2		1.05		47		1.296		1.361
10:50	4.4		95		1.18		1.25		1.05		48		1.443		1.418
10:53	3.6		95		0.97		1.02		1.05		38		1.343		1.513
10:55	4.2		95		1.13		1.18		1.04		42		1.436		1.387
10:56	4.2		95		1.12		1.17		1.04		46		1.334		1.557
10:58	4.3		95		1.15		1.21		1.05		48		1.234		1.374
10:59	4.3		95		1.16		1.23		1.06		51		1.147		1.222
11:01	4.3		95		1.17		1.25		1.07		50		1.276		1.278
11:02	4		95		1.08		1.14		1.06		45		1.281		1.417
11:04	4.2		95		1.12		1.19		1.06		47		1.346		1.431
11:06	3.9		95		1.07		1.12		1.05		44		1.27		1.31
11:08	4.1		95		1.11		1.18		1.06		48		1.323		1.408
11:09	4.1		95		1.11		1.18		1.06		48		1.248		1.416
11:11	4.2		95		1.13		1.19		1.05		44		1.472		1.29
11:13	4		95		1.09		1.15		1.06		43		1.371		1.471
11:15	4		95		1.09		1.14		1.05		45		1.206		1.386
11:16	4.1		95		1.11		1.16		1.05		44		1.263		1.304
11:18	4.1		95		1.11		1.16		1.04		45		1.305		1.353
	Recovery
11:20	4.2		95		1.13		1.17		1.04		47		1.21		1.286
11:21	4		95		1.08		1.13		1.05		44		1.269		1.34
11:23	4.1		95		1.11		1.16		1.04		44		1.255		1.318
11:25	4.3		95		1.16		1.21		1.04		46		1.376		1.386
11:27	4		95		1.08		1.13		1.04		43		1.247		1.363
11:29	4		95		1.08		1.13		1.05		43		1.293		1.344
11:30	4		95		1.07		1.11		1.04		43		1.264		1.362
11:33	3.2		95		0.86		0.92		1.07		29		1.231		1.467
11:35	4.1		95		1.1		1.12		1.02		40		1.256		1.334
11:37	3.7		95		0.99		1.02		1.03		38		1.171		1.376
11:38	3.6		95		0.96		0.99		1.02		38		1.052		1.207
11:40	3.7		95		1		1.01		1.01		33		1.164		1.233
11:43	2.9		95		0.79		0.79		1		24		1.16		1.4
11:45	4.5		95		1.22		1.2		0.98		41		1.224		1.272
11:47	4.5		95		1.23		1.2		0.98		42		1.279		1.24
11:48	4.2		95		1.13		1.13		1		42		1.187		1.354
11:50	3.9		95		1.05		1.06		1.01		39		1.162		1.225
11:52	4.2		95		1.15		1.16		1.01		43		1.235		1.31
11:54	4		95		1.07		1.09		1.02		42		1.19		1.28
11:56	3.9		95		1.06		1.1		1.03		40		1.253		1.344
11:57	3.9		95		1.06		1.11		1.05		42		1.318		1.402
11:59	3.8		95		1.03		1.09		1.06		41		1.296		1.34
12:01	3.4		95		0.92		0.96		1.05		36		1.108		1.22
12:03	2.7		95		0.74		0.77		1.03		28		1.029		1.104
12:05	4		94		1.07		1.09		1.01		37		1.254		1.209
12:07	3.7		94		1.01		1.03		1.02		38		1.14		1.274
12:09	3.6		94		0.98		1.01		1.02		38		1.098		1.186
12:11	3.9		93		1.05		1.09		1.03		40		1.176		1.188
12:13	3.9		93		1.05		1.08		1.03		40		1.169		1.198
12:14	3.6		93		0.99		1.03		1.04		39		1.162		1.252
12:16	3.8		93		1.04		1.08		1.04		40		1.189		1.164
12:18	3.5		93		0.96		1.01		1.06		39		1.153		1.305
12:20	3.5		93		0.94		1.01		1.07		38		1.184		1.247
12:21	3.7		93		1		1.07		1.07		41		1.182		1.225
12:23	3.3		93		0.9		0.97		1.08		36		1.192		1.283
12:25	3.4		93		0.92		0.99		1.08		38		1.152		1.228
12:27	3.4		93		0.92		1		1.09		37		1.323		1.316
12:29	3		93		0.82		0.88		1.07		34		1.086		1.204
12:34	2.8		93		0.75		0.82		1.09		27		1.984		1.954
12:35	2.8		93		0.77		0.75		0.98		28		0.743		0.884
12:37	3.2		93		0.88		0.87		0.99		32		0.855		0.897
12:39	3.4		93		0.93		0.92		0.99		33		0.984		0.985
12:41	3.4		92		0.91		0.91		1		31		1.193		1.166
12:43	3.4		92		0.91		0.92		1.01		33		1.081		1.201
12:45	3.4		92		0.92		0.93		1.01		35		0.976		1.091
12:46	3.6		92		0.98		1		1.02		38		1.084		1.157
12:48	3.7		92		0.99		1.02		1.03		39		1.131		1.118
12:50	3.4		92		0.93		0.97		1.05		38		1.109		1.198
12:52	3.2		92		0.88		0.93		1.06		36		1.026		1.107
12:53	2.9		92		0.79		0.84		1.06		34		0.924		1.018
12:55	2.9		92		0.79		0.84		1.06		33		0.956		1.018
12:56	2.8		92		0.77		0.82		1.06		33		0.858		1.006
12:58	3		92		0.82		0.88		1.07		34		0.923		0.956
13:00	3.2		92		0.87		0.91		1.05		35		0.931		0.871
13:02	2.9		92		0.8		0.83		1.04		31		0.928		0.943
13:03	2.7		92		0.73		0.76		1.03		29		0.898		0.992
13:05	2.5		91		0.69		0.71		1.03		27		0.778		0.883
13:07	2.9		91		0.79		0.78		1		29		0.807		0.769
13:09	2.6		91		0.72		0.7		0.98		26		0.723		0.77
13:10	2.9		90		0.77		0.75		0.97		27		0.771		0.792
13:12	3.4		90		0.91		0.88		0.97		31		0.916		0.927
13:13	2.5		90		0.67		0.62		0.92		21		0.382		0.23
13:15	2.7		90		0.72		0.68		0.95		27		0.762		0.957
13:16	2		90		0.55		0.52		0.95		22		0.543		0.644
13:18	2.3		90		0.62		0.58		0.94		22		0.648		0.651
13:20	2.5		90		0.68		0.62		0.92		22		0.62		0.585
13:21	1.8		90		0.49		0.45		0.91		19		0.522		0.611
13:23	2.5		90		0.69		0.63		0.92		24		0.753		0.74
13:25			90						0.87						0.626
13:41			89
13:56			89
14:12			88
14:28			87
14:44
15:00
15:15
15:31
15:47
16:03
16:18
16:34
	3.49624	0.419377	93.6752	21.6942	0.945838	0.0305612	0.911387	0.040845	0.957896	0.00483689	32.7659	62.8059	1.14627	0.0511517	1.2202	0.0625308
	METS						HR						VO2						VCO2						RER						VE						Vtex						Vtin						LABEL
	Rest		Test		Recovery		Rest		Test		Recovery		Rest		Test		Recovery		Rest		Test		Recovery		Rest		Test		Recovery		Rest		Test		Recovery		Rest		Test		Recovery		Rest		Test		Recovery
	MEDIA	VAR	MEDIA	VAR	MEDIA	VAR	MEDIA	VAR	MEDIA	VAR	MEDIA	VAR	MEDIA	VAR	MEDIA	VAR	MEDIA	VAR	MEDIA	VAR	MEDIA	VAR	MEDIA	VAR	MEDIA	VAR	MEDIA	VAR	MEDIA	VAR	MEDIA	VAR	MEDIA	VAR	MEDIA	VAR	MEDIA	VAR	MEDIA	VAR	MEDIA	VAR	MEDIA	VAR	MEDIA	VAR	MEDIA	VAR	BIN
	1.2375	0.0851667	3.52266	0.429846	3.38824	0.367621	73.0625	0.0625	93.9173	26.0328	92.7534	4.21613	0.33875	0.006145	0.95259	0.0314951	0.918235	0.0261939	0.31625	0.00467833	0.904317	0.0429344	0.940294	0.0317611	0.935882	0.000650735	0.942734	0.00435929	1.01899	0.0021269	12.6875	4.22917	32.223	65.5891	34.9853	46.0147	0.501118	0.0157411	1.16587	0.046992	1.06615	0.0610031	0.529188	0.0125734	1.24415	0.0575198	1.12367	0.0720611	0
	1.2375	0.0851667	3.52266	0.429846	3.38824	0.367621	73.0625	0.0625	93.9173	26.0328	92.7534	4.21613	0.33875	0.006145	0.95259	0.0314951	0.918235	0.0261939	0.31625	0.00467833	0.904317	0.0429344	0.940294	0.0317611	0.935882	0.000650735	0.942734	0.00435929	1.01899	0.0021269	12.6875	4.22917	32.223	65.5891	34.9853	46.0147	0.501118	0.0157411	1.16587	0.046992	1.06615	0.0610031	0.529188	0.0125734	1.24415	0.0575198	1.12367	0.0720611	0
[truncated: 1 more columns]
