# Supplementary material for: On the development of diagnostic support algorithms based on CPET biosignals data via machine learning and wavelets
Source: PeerJ journal article supplement (doi:10.7717/peerj-cs.2474), 2025-01-30
Supplement: raw_data.zip [file Subject09_BxB.xlsx]

## Sheet: Demographics
Gender:	Male
Age:	70
Height (cm):	166
Weight (kg):	90.4
BMI:	33
Condition:	HFrEf

## Sheet: Subject09_BxB
Time	METS		HR		V'O2		V'CO2		RER		V'E		VTex		VTin
min			1/min		L/min		L/min				L/min		L		L
00:00	Rest
00:04	1.8				0.57		0.55		0.96		25		1.776
00:08	1.2		64		0.39		0.38		0.97		19		1.323		2.304
00:13	1.3		62		0.4		0.39		0.98		19		1.355		1.328
00:17	1.1		61		0.35		0.34		0.97		17		1.156		1.316
00:20	1.1		59		0.34		0.32		0.94		16		0.853		0.87
00:24	1.3		57		0.4		0.37		0.92		17		1.201		1.039
00:28	1		57		0.3		0.27		0.9		14		0.817		0.923
00:30	1.1		55		0.36		0.3		0.83		15		0.569		0.424
00:33	0.5		55		0.16		0.13		0.84		11		0.587		0.819
00:36	2.2		55		0.71		0.56		0.79		22		0.794		0.413
00:38	0.4		55		0.12		0.1		0.79		8		0.291		0.71
00:41	1.2		54		0.39		0.32		0.82		16		0.78		0.745
00:43	0.5		54		0.15		0.12		0.79		8		0.348		0.486
00:47	1.8		54		0.56		0.44		0.78		18		1.135		0.695
00:51	1.1		54		0.35		0.28		0.79		13		0.764		0.877
00:55	1.5		54		0.48		0.38		0.79		16		1.195		1.101
00:58	1		54		0.32		0.24		0.75		11		0.616		0.597
01:03	1.2		54		0.37		0.29		0.78		13		0.928		0.987
01:05	0.9		55		0.28		0.21		0.74		11		0.508		0.471
01:10	1		55		0.32		0.25		0.79		12		0.972		1.192
01:15	0.9		55		0.3		0.23		0.77		11		0.794		0.622
01:15	Test
01:18	1.2		55		0.39		0.3		0.77		14		0.817		1.002
01:22	1.5		55		0.46		0.36		0.77		15		1.058		1.057
01:25	1.5		57		0.49		0.37		0.75		16		0.82		0.73
01:29	2		57		0.64		0.48		0.75		20		1.102		0.977
01:32	1.9		59		0.61		0.47		0.77		21		1.115		1.173
01:35	1.9		62		0.6		0.46		0.76		21		0.955		0.914
01:38	1.9		62		0.61		0.47		0.77		21		1.125		1.136
01:41	2		65		0.64		0.51		0.81		24		1.41		1.543
01:44	2		67		0.64		0.52		0.81		25		1.225		1.196
01:48	2		67		0.62		0.51		0.83		25		1.343		1.445
01:51	2		68		0.63		0.54		0.85		27		1.36		1.434
01:54	2.1		68		0.66		0.57		0.87		28		1.569		1.617
01:58	2		71		0.62		0.56		0.89		28		1.656		1.805
02:01	2		73		0.63		0.56		0.89		28		1.335		1.413
02:05	2.1		75		0.65		0.59		0.91		28		2.18		2.353
02:08	2.1		75		0.65		0.57		0.88		28		1.412		1.54
02:11	2.2		77		0.69		0.6		0.87		30		1.468		1.548
02:14	2.2		77		0.7		0.6		0.85		30		1.423		1.517
02:17	2.2		78		0.69		0.59		0.85		28		1.463		1.564
02:20	2.2		79		0.68		0.57		0.84		28		1.292		1.43
02:23	2.3		79		0.71		0.59		0.83		28		1.294		1.391
02:26	2.3		80		0.74		0.6		0.82		28		1.377		1.492
02:28	2.4		80		0.75		0.6		0.81		28		1.271		1.358
02:31	2.4		81		0.75		0.6		0.8		29		1.211		1.292
02:33	2.4		81		0.75		0.59		0.79		28		1.216		1.272
02:36	2.8		82		0.87		0.68		0.78		31		1.335		1.326
02:39	2.7		82		0.86		0.68		0.79		31		1.496		1.582
02:42	2.9		83		0.93		0.74		0.8		35		1.619		1.706
02:44	2.7		83		0.85		0.69		0.81		33		1.554		1.675
02:47	2.8		83		0.89		0.74		0.83		35		1.692		1.792
02:50	3		84		0.93		0.78		0.84		37		1.831		1.862
02:53	2.7		84		0.87		0.73		0.85		36		1.694		1.87
02:56	2.8		85		0.87		0.75		0.86		37		1.638		1.777
02:59	2.9		85		0.93		0.81		0.87		39		1.874		1.842
03:01	2.7		86		0.85		0.74		0.87		37		1.688		1.879
03:04	2.7		86		0.86		0.76		0.88		38		1.576		1.696
03:06	2.9		87		0.9		0.79		0.88		39		1.572		1.637
03:09	2.9		87		0.92		0.81		0.88		39		1.644		1.668
03:11	2.8		88		0.87		0.78		0.89		39		1.623		1.75
03:14	2.8		88		0.9		0.79		0.88		39		1.6		1.668
03:16	2.8		88		0.88		0.78		0.89		39		1.533		1.636
03:18	2.9		89		0.93		0.83		0.88		40		1.537		1.542
03:21	2.7		89		0.85		0.76		0.89		37		1.508		1.649
03:23	2.8		89		0.88		0.78		0.89		38		1.59		1.666
03:26	2.8		90		0.9		0.8		0.89		39		1.719		1.795
03:29	2.9		90		0.91		0.81		0.89		39		1.691		1.795
03:31	3		90		0.94		0.84		0.89		41		1.81		1.82
03:34	2.8		90		0.88		0.78		0.89		38		1.725		1.842
03:37	2.9		91		0.93		0.83		0.89		40		1.869		1.981
03:39	2.9		93		0.9		0.82		0.9		40		1.801		1.916
03:42	2.7		93		0.87		0.79		0.91		39		1.709		1.831
03:45	3		93		0.94		0.86		0.91		42		1.911		1.967
03:47	2.9		93		0.92		0.84		0.91		41		1.783		1.89
03:50	2.9		94		0.93		0.85		0.91		41		1.738		1.821
03:53	2.7		94		0.87		0.8		0.92		39		1.787		1.951
03:55	2.9		95		0.93		0.85		0.91		41		1.881		1.892
03:58	2		95		0.64		0.58		0.9		31		1.142		1.499
04:01	2.3		96		0.73		0.64		0.87		30		1.486		1.349
04:03	3.5		96		1.1		0.96		0.87		43		1.852		1.838
04:06	3.3		96		1.03		0.92		0.9		43		2.003		2.108
04:09	3		96		0.95		0.86		0.9		40		1.875		2.009
04:12	3.1		96		0.97		0.88		0.91		42		1.919		2.044
04:15	2.9		96		0.91		0.85		0.93		41		1.961		2.145
04:17	3.1		96		0.97		0.89		0.92		42		1.924		2.009
04:20	3.1		96		0.97		0.9		0.93		43		1.877		2.017
04:23	3		96		0.94		0.87		0.93		42		1.826		1.962
04:25	3		97		0.96		0.89		0.92		43		1.786		1.861
04:28	3.1		97		0.97		0.91		0.94		44		1.895		1.957
04:30	3.1		97		0.98		0.93		0.95		44		1.922		1.995
04:33	2.9		97		0.91		0.86		0.95		41		1.841		1.978
04:36	2.9		98		0.92		0.87		0.95		42		1.848		2.021
04:38	3		98		0.95		0.89		0.94		41		1.846		1.888
04:41	2.9		99		0.93		0.87		0.94		41		1.744		1.878
04:44	3.1		99		0.98		0.93		0.94		43		1.914		1.944
04:46	3		99		0.96		0.91		0.95		43		1.854		2
04:49	2.8		99		0.89		0.85		0.95		40		1.842		2.034
04:52	2.9		100		0.93		0.89		0.96		42		1.88		1.968
04:54	2.9		100		0.93		0.89		0.96		43		1.836		2.042
04:57	3.2		100		1		0.96		0.96		45		1.886		1.954
04:59	3.1		100		0.98		0.94		0.96		44		1.866		1.898
05:02	3.1		101		0.99		0.94		0.95		44		1.836		1.938
05:04	3.1		101		0.99		0.96		0.96		44		2.016		2.118
05:07	2.9		101		0.93		0.9		0.97		43		1.889		2.099
05:10	3.2		101		1.01		0.97		0.97		46		2.012		2.05
05:12	3.1		101		0.98		0.96		0.98		44		2.011		2.093
05:16	2.8		101		0.89		0.88		0.99		39		2.406		2.547
05:19	2.9		102		0.92		0.88		0.96		41		1.819		2.096
05:21	3.1		102		0.97		0.92		0.95		43		1.744		1.848
05:24	3.2		102		1		0.96		0.95		45		1.744		1.856
05:26	3.1		102		0.99		0.96		0.97		45		1.783		1.851
05:28	3.1		102		0.99		0.96		0.97		45		1.86		1.984
05:31	3.2		103		1.02		0.98		0.96		45		1.917		1.945
05:33	3.1		103		0.98		0.95		0.97		45		1.849		2.076
05:36	3.1		103		0.99		0.98		0.98		46		1.915		1.975
05:39	3.1		103		0.97		0.96		0.99		45		1.926		2.091
05:41	3		104		0.95		0.93		0.98		45		1.846		2.043
05:43	3.1		104		1		1		1		50		1.796		2.063
05:45	3.6		104		1.14		1.15		1.01		57		1.904		1.881
05:47	3.4		104		1.07		1.08		1.01		55		1.892		1.969
05:49	3.2		104		1.02		1.03		1.01		51		1.917		2.008
05:52	3.2		104		1.01		1.03		1.02		50		1.919		1.978
05:54	3.3		104		1.03		1.05		1.02		52		1.884		1.994
05:58	2.1		104		0.66		0.65		0.99		30		1.881		2.046
06:00	2.9		104		0.92		0.92		0.99		44		1.436		1.897
06:03	2.8		104		0.9		0.86		0.96		36		1.798		1.474
06:05	3.3		104		1.04		0.99		0.96		42		1.608		1.734
06:07	3.4		104		1.07		1.06		0.99		49		1.691		1.915
06:09	3.1		104		1		0.98		0.99		45		1.764		1.763
06:09	Recovery
06:12	3.4		104		1.08		1.07		0.99		49		1.836		1.947
06:14	3.2		104		1		1		1		48		1.803		1.922
06:16	3.2		103		1.02		1.02		1		46		1.767		1.824
06:18	3.4		103		1.08		1.09		1		52		1.885		1.948
06:21	3.1		102		0.97		0.97		1		45		1.653		1.891
06:23	3.3		102		1.04		1.06		1.01		48		1.947		1.943
06:26	3.1		101		0.97		0.98		1		44		1.923		2.059
06:28	2.9		101		0.92		0.92		1.01		43		1.87		2.069
06:31	3.2		100		1.01		1.01		0.99		46		1.835		1.872
06:33	1.3		100		0.42		0.42		1.01		42		1.987		1.944
06:36	0		100		0		0		0.24		32		1.388		1.817
06:38	0		100		0		0		0.02		40		1.265		1.317
06:41	0		99		0		0		0.53		29		1.24		1.444
06:43	0.2		99		0.06		0.05		0.94		38		1.527		1.188
06:45	3.8		98		1.2		1.15		0.95		48		1.989		1.932
06:48	3.2		98		1.02		0.99		0.98		46		1.777		1.984
06:50	3.6		97		1.13		1.12		1		52		1.953		1.916
06:53	3.2		97		1		1		1		46		1.975		1.977
06:55	3		96		0.96		0.97		1.01		44		1.999		2.137
06:58	2.9		96		0.92		0.93		1.01		42		1.964		2.038
07:01	2.7		96		0.86		0.87		1.01		38		1.925		1.956
07:04	2.8		96		0.89		0.9		1.01		40		1.913		2.046
07:07	2.9		95		0.91		0.9		0.99		41		1.832		1.888
07:09	3.2		94		1.01		1		0.99		46		1.937		1.944
07:13	2.8		94		0.9		0.92		1.03		40		2.238		2.361
07:15	2.8		93		0.89		0.9		1.01		43		1.844		2.021
07:18	3		93		0.93		0.95		1.01		44		1.899		1.913
07:20	2.8		93		0.89		0.91		1.02		43		1.841		1.942
07:23	2.7		93		0.86		0.88		1.02		40		1.775		1.786
07:25	3		92		0.94		0.95		1.01		46		1.782		1.806
07:28	2.8		92		0.89		0.92		1.03		45		1.863		1.963
07:30	2.5		90		0.8		0.83		1.03		40		1.735		1.834
07:33	2.6		90		0.82		0.85		1.03		40		1.714		1.795
07:36	2.4		90		0.77		0.8		1.04		38		1.713		1.784
07:38	2.7		90		0.84		0.87		1.03		42		1.727		1.764
07:41	2.6		89		0.83		0.86		1.04		42		1.744		1.753
07:43	2.4		89		0.77		0.81		1.05		39		1.779		1.813
07:46	2.3		90		0.72		0.76		1.04		36		1.677		1.781
07:49	2.2		90		0.69		0.72		1.04		34		1.583		1.663
07:52	2.3		89		0.72		0.75		1.04		37		1.631		1.734
07:54	2.3		85		0.73		0.76		1.04		37		1.603		1.562
07:57	2.5		85		0.79		0.83		1.04		41		1.698		1.698
07:59	2.3		84		0.73		0.77		1.06		39		1.7		1.741
08:02	2.1		84		0.67		0.71		1.07		35		1.661		1.644
08:05	2.3		83		0.73		0.78		1.07		40		1.71		1.72
08:08	2.1		83		0.68		0.73		1.08		37		1.69		1.7
08:10	2.1		82		0.66		0.71		1.07		36		1.642		1.644
08:13	1.8		82		0.58		0.62		1.07		32		1.444		1.489
08:29			83
08:44			82
09:00			80
09:16			76
09:32			76
09:48			74
10:03			72
	2.67436	0.403854	90.4908	138.313	0.84609	0.0402704	0.796859	0.0450965	0.923462	0.0157699	38.8141	60.9265	1.70062	0.069824	1.78569	0.0820835
	METS						HR						VO2						VCO2						RER						VE						Vtex						Vtin						LABEL
	Rest		Test		Recovery		Rest		Test		Recovery		Rest		Test		Recovery		Rest		Test		Recovery		Rest		Test		Recovery		Rest		Test		Recovery		Rest		Test		Recovery		Rest		Test		Recovery
	MEDIA	VAR	MEDIA	VAR	MEDIA	VAR	MEDIA	VAR	MEDIA	VAR	MEDIA	VAR	MEDIA	VAR	MEDIA	VAR	MEDIA	VAR	MEDIA	VAR	MEDIA	VAR	MEDIA	VAR	MEDIA	VAR	MEDIA	VAR	MEDIA	VAR	MEDIA	VAR	MEDIA	VAR	MEDIA	VAR	MEDIA	VAR	MEDIA	VAR	MEDIA	VAR	MEDIA	VAR	MEDIA	VAR	MEDIA	VAR	BIN
	1.14762	0.186619	2.74259	0.220412	2.52083	0.795301	56.15	8.97632	89.8241	173.959	91.8	67.6074	0.362857	0.0192514	0.8675	0.0221199	0.797917	0.0790254	0.308095	0.0149162	0.789815	0.0310916	0.812708	0.0775691	0.842381	0.00666905	0.901852	0.0046956	0.972083	0.0378296	14.8571	19.0286	37.6296	72.4597	41.4792	25.4889	0.893429	0.131934	1.67049	0.0823786	1.7684	0.0359505	0.89595	0.188349	1.76531	0.0988146	1.83154	0.0426382	0
	1.14762	0.186619	2.74259	0.220412	2.52083	0.795301	56.15	8.97632	89.8241	173.959	91.8	67.6074	0.362857	0.0192514	0.8675	0.0221199	0.797917	0.0790254	0.308095	0.0149162	0.789815	0.0310916	0.812708	0.0775691	0.842381	0.00666905	0.901852	0.0046956	0.972083	0.0378296	14.8571	19.0286	37.6296	72.4597	41.4792	25.4889	0.893429	0.131934	1.67049	0.0823786	1.7684	0.0359505	0.89595	0.188349	1.76531	0.0988146	1.83154	0.0426382	0
[truncated: 1 more columns]
