# Supplementary material for: On the development of diagnostic support algorithms based on CPET biosignals data via machine learning and wavelets
Source: PeerJ journal article supplement (doi:10.7717/peerj-cs.2474), 2025-01-30
Supplement: raw_data.zip [file Subject10_BxB.xlsx]

## Sheet: Demographics
Gender:	Male
Age:	56
Height (cm):	173
Weight (kg):	94.8
BMI:	32
Condition:	HFrEf

## Sheet: Subject10_BxB
Time	METS		HR		V'O2		V'CO2		RER		V'E		VTex		VTin
min			1/min		L/min		L/min				L/min		L		L
00:00	Rest
04:05	0		0		0		0		0.84		0		0.355		0
04:08	0.7		83		0.23		0.18		0.8		9		0.448		0.619
04:12	1.9		85		0.63		0.5		0.8		18		0.999		0.842
04:17	2.3		87		0.76		0.67		0.88		25		2.397		2.445
04:21	1.3		88		0.43		0.37		0.84		15		0.795		0.827
04:25	1.1		88		0.36		0.29		0.81		12		0.749		0.739
04:27	1.6		88		0.53		0.41		0.77		15		0.742		0.632
04:31	1.3		88		0.44		0.35		0.79		14		0.782		0.909
04:35	1.2		88		0.39		0.3		0.79		11		0.698		0.758
04:38	0.9		88		0.31		0.24		0.77		10		0.548		0.641
04:41	1.1		86		0.36		0.27		0.77		11		0.606		0.68
04:44	1.6		85		0.52		0.39		0.76		15		0.781		0.719
04:48	1.6		85		0.52		0.39		0.76		15		0.797		0.855
04:52	1.8		85		0.59		0.47		0.81		17		1.137		1.222
04:55	1.4		85		0.47		0.38		0.81		15		0.877		0.957
04:59	1.3		85		0.44		0.37		0.84		14		0.888		0.952
05:02	1.2		85		0.4		0.34		0.84		14		0.832		0.898
05:05	1.4		85		0.47		0.39		0.84		15		0.63		0.731
05:08	1.6		85		0.52		0.44		0.85		18		0.858		0.829
05:11	1.5		86		0.5		0.43		0.87		17		0.988		0.952
05:15	1		87		0.34		0.29		0.85		13		0.754		0.818
05:18	1.2		87		0.41		0.35		0.85		13		0.789		0.724
05:24	0.8		87		0.27		0.24		0.89		9		0.867		1.358
05:30	0.7		87		0.24		0.2		0.83		7		0.672		0.633
05:34	0.7		87		0.24		0.18		0.76		7		0.477		0.455
05:38	0.8		86		0.26		0.18		0.7		5		0.344		0.119
05:43	1.2		88		0.39		0.28		0.72		9		0.823		1.373
05:47	1.4		90		0.47		0.35		0.76		13		0.77		1.029
05:50	1.9		95		0.64		0.51		0.79		20		0.984		1.141
05:53	2		95		0.67		0.55		0.82		22		1.032		0.999
05:56	1.6		92		0.53		0.45		0.84		18		0.838		0.905
05:59	1.7		92		0.58		0.51		0.88		20		1.024		0.914
06:02	1.3		85		0.43		0.39		0.91		16		0.796		0.889
06:05	1.5		82		0.49		0.45		0.92		18		0.956		0.826
06:08	1.1		82		0.35		0.33		0.93		14		0.741		0.759
06:11	0.9		82		0.31		0.29		0.93		12		0.671		0.699
06:15	0.7		82		0.23		0.21		0.91		9		0.545		0.603
06:18	0.7		82		0.23		0.2		0.89		9		0.507		0.523
06:21	0.5		82		0.17		0.14		0.84		7		0.372		0.337
06:25	0.7		82		0.24		0.2		0.82		8		0.507		0.502
06:29	0.8		81		0.28		0.22		0.8		9		0.604		0.602
06:33	0.9		81		0.31		0.24		0.78		9		0.526		0.573
06:36	1		80		0.34		0.27		0.78		10		0.584		0.663
06:40	1.1		80		0.35		0.28		0.81		11		0.66		0.834
06:43	1.3		80		0.42		0.35		0.82		13		0.739		0.797
06:47	1.2		80		0.39		0.33		0.85		13		0.791		0.868
06:50	1.5				0.48		0.42		0.87		16		0.889		0.867
06:53	1.2				0.39		0.35		0.89		14		0.795		0.794
06:57	1				0.33		0.3		0.9		12		0.732		0.775
07:00	0.7		77		0.25		0.22		0.89		10		0.538		0.623
07:03	0.4		77		0.14		0.11		0.84		5		0.226		0.952
07:07	1.3		80		0.42		0.37		0.89		15		0.895		0.304
07:10	1.1		81		0.38		0.32		0.86		12		0.683		0.575
07:13	1.2		81		0.4		0.34		0.86		13		0.755		0.759
07:21	1.3		83		0.43		0.39		0.9		14		1.713		1.838
07:25	0.4		84		0.14		0.12		0.84		6		0.396		0.505
07:30	0.6		85		0.21		0.18		0.85		7		0.612		0.724
07:36	0.7		85		0.22		0.18		0.8		8		0.7		0.699
07:39	1.1		85		0.36		0.3		0.81		14		0.734		0.945
07:42	1.3		85		0.45		0.36		0.81		14		0.676		0.69
07:43	0.1		85		0.02		0.02		0.69		8		0.214		0.811
07:45	0.6		85		0.19		0.16		0.86		15		0.462		0.668
07:50	1.7		77		0.55		0.47		0.86		18		1.377		0.856
07:52	0.5		77		0.17		0.14		0.84		12		0.367		0.649
07:55	1.9		78		0.64		0.53		0.82		17		0.831		0.258
07:56	0.1		78		0.02		0.02		0.96		4		0.116		0.329
08:03	0.9		80		0.29		0.22		0.74		8		0.818		0.479
08:07	0.5		86		0.16		0.12		0.74		6		0.378		0.63
08:10	1.6		85		0.54		0.41		0.77		15		0.75		0.868
08:14	1.9		85		0.64		0.52		0.82		19		1.258		1.3
08:17	1.5		83		0.48		0.41		0.86		18		0.883		1.019
08:20	1.5		83		0.5		0.45		0.9		19		1.02		1.014
08:24	1.2		83		0.39		0.37		0.93		15		0.925		0.891
08:27	1.2		83		0.39		0.37		0.94		16		0.875		0.894
08:30	0.9		83		0.3		0.29		0.94		13		0.623		0.65
08:33	0.7		83		0.23		0.21		0.93		11		0.505		0.535
08:36	1		83		0.34		0.32		0.93		13		0.734		0.666
08:40	0.8		83		0.26		0.24		0.94		10		0.658		0.651
08:44	0.7		83		0.24		0.22		0.91		9		0.62		0.626
08:47	0.5		82		0.17		0.15		0.86		8		0.38		0.491
08:50	1		82		0.32		0.28		0.86		11		0.576		0.553
08:54	0.7		82		0.23		0.2		0.84		8		0.535		0.61
08:57	1.2		82		0.41		0.35		0.84		14		0.773		0.668
09:01	1		82		0.32		0.27		0.85		11		0.633		0.766
09:05	1.3		82		0.43		0.37		0.85		14		0.895		0.83
09:08	1.2		82		0.39		0.34		0.88		14		0.83		0.859
09:12	1.1		82		0.38		0.33		0.88		14		0.799		0.79
09:15	1.1		82		0.36		0.32		0.9		13		0.797		0.843
09:18	1		82		0.34		0.31		0.9		13		0.727		0.71
09:22	1.6		82		0.52		0.5		0.95		20		1.292		1.348
09:27	0.6		82		0.21		0.2		0.96		10		0.713		0.889
09:28	1.4		82		0.46		0.41		0.9		19		0.505		0.238
09:31	0.9		83		0.3		0.27		0.88		11		0.538		0.577
09:40	1.3		85		0.42		0.41		0.98		15		2.274		2.243
09:44	0.1		85		0.03		0.03		0.86		2		0.135		0.201
09:48	0.3		84		0.1		0.08		0.8		5		0.337		0.546
09:49	0.1		84		0.04		0.04		0.89		7		0.102		0.317
09:53	1.5		82		0.5		0.4		0.8		17		0.937		0.64
09:55	1.4		84		0.47		0.37		0.78		14		0.643		0.549
09:58	1.1		84		0.35		0.28		0.78		15		0.678		0.837
10:00	0.4		83		0.14		0.1		0.75		9		0.259		0.43
10:04	1.9		83		0.64		0.53		0.83		18		1.204		1.101
10:07	1.1		77		0.37		0.31		0.84		12		0.774		0.853
10:07	Test
10:11	1.6		78		0.54		0.46		0.85		17		0.882		0.993
10:15	2.2		85		0.73		0.7		0.95		28		2.215		2.271
10:19	1.5		85		0.48		0.48		0.99		19		1.105		1.186
10:21	1		82		0.32		0.3		0.93		14		0.496		0.561
10:24	0.9		87		0.3		0.27		0.89		12		0.636		0.628
10:27	2		87		0.65		0.55		0.85		19		0.783		0.61
10:29	1.5		87		0.48		0.39		0.81		15		0.533		0.5
10:31	1.6		95		0.51		0.43		0.83		18		0.572		0.877
10:32	0.1		95		0.02		0.01		0.67		6		0.128		0.626
10:36	1.6		97		0.53		0.43		0.81		16		1.009		0.514
10:41	1.5		100		0.5		0.41		0.82		13		1.171		1.324
10:44	1.4		100		0.45		0.35		0.78		13		0.669		0.763
10:47	1.4		100		0.46		0.35		0.77		13		0.695		0.788
10:50	1.8		100		0.59		0.46		0.77		16		0.769		0.985
10:53	2.9		100		0.96		0.75		0.78		27		1.013		1.089
10:55	2.7		100		0.89		0.7		0.79		27		0.938		0.975
10:57	2.7		100		0.9		0.72		0.8		28		1.022		1.13
10:59	2.9		101		0.95		0.78		0.83		32		1.236		1.302
11:01	2.7		101		0.88		0.73		0.83		30		1.136		1.2
11:04	2.7		104		0.9		0.77		0.85		30		1.398		1.412
11:07	2		104		0.68		0.56		0.83		22		0.865		0.993
11:09	2.4		104		0.8		0.65		0.81		24		0.89		0.853
11:11	2.2		106		0.75		0.58		0.78		22		0.71		0.714
11:12	2.2		106		0.74		0.56		0.76		22		0.645		0.717
11:15	2.5		107		0.84		0.63		0.75		23		0.83		0.78
11:17	2.3		107		0.76		0.56		0.74		21		0.778		0.882
11:19	2.5		107		0.84		0.61		0.72		23		0.776		0.844
11:21	3		106		0.99		0.72		0.73		26		0.912		0.968
11:23	3.4		106		1.12		0.81		0.73		28		1.111		1.05
11:26	3		106		0.98		0.74		0.75		28		1.083		1.225
11:28	3.4		106		1.13		0.86		0.76		33		1.207		1.246
11:30	2.5		107		0.82		0.62		0.76		23		0.874		0.979
11:32	3		107		0.98		0.75		0.76		27		0.985		1.096
11:35	3.4		108		1.14		0.91		0.8		34		1.559		1.633
11:38	2.7		108		0.91		0.72		0.79		26		1.101		1.174
11:41	3.1		109		1.04		0.81		0.78		28		1.427		1.232
11:43	2.9		109		0.95		0.73		0.77		27		0.937		1.197
11:47	3.2		109		1.06		0.89		0.84		32		2.163		2.332
11:49	3.4		109		1.12		0.89		0.79		35		1.233		1.303
11:51	3.2		110		1.05		0.82		0.78		33		0.937		0.954
11:52	3.4		110		1.12		0.88		0.79		35		0.984		1.01
11:54	3.3		111		1.1		0.87		0.79		35		1.097		1.046
11:56	3.1		111		1.02		0.81		0.79		31		1.046		1.077
11:59	2.8		111		0.94		0.74		0.79		26		1.01		1.057
12:01	3		112		0.99		0.76		0.77		28		0.982		0.976
12:03	2.6		112		0.86		0.64		0.75		24		0.804		0.783
12:05	3.2		113		1.05		0.8		0.76		31		0.984		1.103
12:07	3.4		113		1.14		0.88		0.77		31		1.32		1.358
12:09	3		113		1		0.77		0.76		29		0.881		1.138
12:11	3.6		113		1.2		0.91		0.76		36		0.979		0.97
12:13	3.7		113		1.24		0.96		0.77		35		1.172		1.142
12:15	3.5		113		1.15		0.87		0.76		32		0.958		0.988
12:16	3.1		113		1.03		0.8		0.77		31		0.944		1.076
12:18	3.6		113		1.2		0.93		0.78		33		1.111		1.062
12:20	3.1		113		1.03		0.81		0.79		30		1.061		1.178
12:23	3.5		113		1.16		0.91		0.79		32		1.256		1.21
12:25	3		113		0.99		0.79		0.8		28		1.245		1.405
12:28	3.8		113		1.26		1.01		0.8		38		1.374		1.371
12:30	3.4		113		1.12		0.91		0.81		35		1.241		1.325
12:32	3.1		113		1.02		0.82		0.81		31		1.048		1.137
12:34	3.5		113		1.17		0.96		0.82		36		1.301		1.326
12:36	3.6		114		1.21		0.99		0.82		37		1.25		1.296
12:38	3.4		114		1.13		0.93		0.82		36		1.171		1.244
12:40	3.3		116		1.08		0.88		0.81		33		1.133		1.116
12:42	3.1		116		1.03		0.83		0.81		33		1.087		1.204
12:44	3.5		116		1.16		0.93		0.8		34		1.118		1.179
12:46	3.3		116		1.1		0.89		0.81		33		1.165		1.223
12:48	3.8		116		1.25		1.01		0.81		37		1.259		1.255
12:50	3.4		116		1.14		0.93		0.82		37		1.09		1.236
12:52	3.5		116		1.17		0.95		0.82		37		1.169		1.148
12:53	3.4		116		1.12		0.92		0.82		36		1.073		1.19
12:55	3.4		116		1.14		0.94		0.82		35		1.119		1.11
12:57	3.4		116		1.13		0.93		0.82		36		1.137		1.249
12:59	3.4		116		1.13		0.92		0.82		37		1.144		1.182
13:01	3.5		116		1.17		0.96		0.82		36		1.162		1.204
13:03	3.3		116		1.1		0.91		0.83		36		1.011		1.149
13:05	3.5		116		1.16		0.96		0.83		36		1.113		1.134
13:07	3.4		116		1.13		0.93		0.82		35		1.189		1.233
13:09	3.5		116		1.17		0.97		0.83		36		1.402		1.475
13:11	3.3		116		1.1		0.9		0.82		35		1.145		1.251
13:13	3.4		116		1.14		0.93		0.82		36		1.145		1.162
13:15	3.3		116		1.1		0.9		0.82		35		1.119		1.192
13:17	3.4		116		1.14		0.93		0.82		36		1.162		1.168
13:19	3.4		116		1.14		0.93		0.81		35		1.209		1.22
13:21	3.4		117		1.14		0.93		0.82		35		1.294		1.344
13:24	3.5		117		1.18		1.01		0.86		35		1.897		1.936
13:28	3.2		117		1.05		0.88		0.84		28		1.789		1.744
13:32	2.8		117		0.93		0.76		0.82		24		1.607		1.694
13:36	2.6		117		0.87		0.69		0.79		20		1.47		1.644
13:40	3.5		116		1.16		0.9		0.78		27		1.608		1.769
13:44	3.8		116		1.25		0.99		0.8		30		1.87		1.97
13:46	3.4		115		1.13		0.89		0.79		29		1.263		1.379
13:50	3.7		115		1.24		1.05		0.85		34		2.067		2.295
13:53	3.5		115		1.15		0.96		0.84		31		1.496		1.654
13:56	3.3		114		1.11		0.91		0.82		28		1.568		1.511
14:00	3.3		115		1.1		0.92		0.84		29		1.601		1.907
14:02	3.9		115		1.3		1.08		0.83		35		1.241		1.348
14:04	3.8		115		1.25		1.05		0.84		36		1.268		1.332
14:05	4.6		115		1.54		1.29		0.84		48		1.309		1.356
14:07	3.9		115		1.3		1.11		0.85		39		1.226		1.236
14:09	3.4		116		1.11		0.95		0.86		34		1.126		1.275
14:11	4		116		1.33		1.13		0.85		41		1.217		1.235
14:14	3.6		116		1.19		1.05		0.88		34		1.481		1.644
14:16	3.6		115		1.19		1.04		0.88		36		1.244		1.303
14:17	4.1		115		1.36		1.17		0.86		45		1.134		1.287
14:19	3.9		115		1.3		1.12		0.86		40		1.06		1.044
14:21	3.9		115		1.3		1.12		0.87		40		1.24		1.187
14:23	3.3		115		1.08		0.95		0.87		34		1.116		1.285
14:25	3.8		116		1.25		1.12		0.89		39		1.405		1.44
14:28	3.7		116		1.21		1.11		0.92		38		1.857		2.066
14:30	3.6		115		1.18		1.04		0.88		38		1.2		1.239
14:32	3.7		115		1.23		1.08		0.88		38		1.312		1.286
14:34	3.5		115		1.17		1.05		0.89		38		1.288		1.507
14:36	3.9		115		1.31		1.14		0.87		41		1.205		1.259
14:38	3.7		115		1.23		1.08		0.87		38		1.224		1.248
14:40	3.9		115		1.28		1.12		0.87		37		1.373		1.325
14:42	3.6		115		1.19		1.05		0.89		40		1.304		1.514
14:44	3.9		115		1.3		1.15		0.88		43		1.289		1.348
14:45	3.6		116		1.19		1.07		0.89		40		1.211		1.291
14:47	3.8		116		1.27		1.14		0.9		42		1.286		1.364
14:49	3.7		117		1.24		1.1		0.89		38		1.364		1.325
14:52	3.2		117		1.06		0.97		0.92		32		1.618		1.826
14:55	3.6		118		1.2		1.07		0.89		38		1.353		1.454
14:56	3.8		118		1.26		1.1		0.88		42		1.256		1.422
14:58	4		118		1.32		1.16		0.88		44		1.164		1.159
15:00	4.1		120		1.37		1.21		0.88		41		1.279		1.347
15:02	3		120		0.99		0.86		0.87		31		1.079		1.192
15:04	3.9		120		1.3		1.11		0.86		37		1.266		1.339
15:06	4.9		121		1.61		1.38		0.85		48		1.508		1.497
15:08	4.3		121		1.42		1.24		0.87		45		1.415		1.534
15:10	4.3		121		1.44		1.27		0.88		46		1.471		1.527
15:12	3.5		121		1.17		1.04		0.89		36		1.431		1.457
15:14	4.4		121		1.45		1.26		0.86		46		1.362		1.448
15:16	4.4		121		1.45		1.28		0.89		46		1.468		1.554
15:18	3.8		121		1.27		1.15		0.91		42		1.605		1.672
15:21	3.5		121		1.16		1.05		0.91		35		1.659		1.771
15:24	3.4		121		1.14		1.01		0.88		32		1.6		1.593
15:26	3.7		120		1.22		1.05		0.86		35		1.468		1.527
15:28	4.1		120		1.36		1.16		0.85		41		1.299		1.418
15:32	3.7		121		1.23		1.11		0.91		34		2.092		2.283
15:34	3.7		122		1.24		1.07		0.87		34		1.467		1.634
15:37	3.6		122		1.2		1.04		0.87		34		1.482		1.57
15:40	4		122		1.32		1.13		0.85		36		1.451		1.536
15:42	3.8		122		1.27		1.09		0.86		34		1.561		1.675
15:45	4		122		1.31		1.13		0.86		36		1.511		1.643
15:47	3.7		122		1.21		1.04		0.86		35		1.31		1.538
15:48	4.9		122		1.63		1.39		0.86		49		1.225		1.32
15:50	4.4		123		1.47		1.28		0.87		45		1.304		1.332
15:52	4		123		1.31		1.17		0.89		41		1.385		1.455
15:55	4.1		123		1.36		1.22		0.9		41		1.55		1.614
15:57	3.6		123		1.19		1.08		0.91		37		1.564		1.698
16:00	3.9		123		1.3		1.17		0.9		37		1.692		1.709
16:02	3.7		123		1.24		1.13		0.91		37		1.487		1.844
16:05	4.1		123		1.35		1.21		0.9		39		1.606		1.576
16:07	3.9		123		1.3		1.15		0.89		38		1.361		1.471
16:09	4.2		123		1.38		1.24		0.89		41		1.458		1.589
16:11	4.3		123		1.44		1.3		0.9		47		1.413		1.601
16:13	4.4		123		1.45		1.32		0.91		47		1.354		1.44
16:15	3.9		123		1.31		1.22		0.93		42		1.437		1.565
16:17	4.1		123		1.36		1.26		0.93		41		1.667		1.689
16:19	3.6		125		1.19		1.12		0.94		37		1.54		1.806
16:22	4		125		1.32		1.23		0.93		40		1.5		1.595
16:24	3.9		125		1.3		1.2		0.92		40		1.453		1.588
16:26	3.8		125		1.25		1.15		0.92		37		1.448		1.526
16:29	3.5		126		1.15		1.08		0.93		34		1.812		1.964
16:33	3.7		126		1.21		1.11		0.91		34		1.782		1.894
16:36	3.6		127		1.18		1.06		0.9		33		1.727		1.93
16:39	4		127		1.33		1.19		0.89		37		1.672		1.862
16:41	3.8		127		1.26		1.13		0.9		36		1.538		1.743
16:44	3.7		127		1.24		1.1		0.89		34		1.597		1.823
16:46	4.5		126		1.48		1.3		0.88		40		1.672		1.737
16:49	3.9		125		1.3		1.17		0.9		37		1.658		1.862
16:52	4.3		125		1.42		1.28		0.9		40		1.72		1.849
16:54	4.1		125		1.36		1.25		0.92		40		1.778		1.956
16:57	4.1		125		1.36		1.25		0.92		42		1.548		1.802
16:59	3.5		125		1.15		1.07		0.93		37		1.318		1.469
17:01	4.5		125		1.48		1.37		0.92		43		1.605		1.653
17:03	4.2		125		1.39		1.29		0.93		40		1.643		1.811
17:06	4		126		1.33		1.25		0.94		40		1.804		2.006
17:09	4.3		126		1.41		1.31		0.93		42		1.655		1.725
17:12	3.7		126		1.22		1.16		0.95		36		1.877		2.033
17:15	3.7		126		1.24		1.17		0.94		36		1.702		1.957
17:17	4.1		126		1.37		1.27		0.93		39		1.674		1.778
17:20	4.3		127		1.43		1.32		0.92		42		1.73		1.85
17:22	3.7		127		1.22		1.15		0.94		35		1.651		1.9
17:25	3.9		127		1.28		1.19		0.93		37		1.8		1.797
17:28	4.2		127		1.39		1.3		0.93		40		1.734		1.987
17:31	4.1		127		1.35		1.26		0.94		39		1.837		1.971
17:34	4		127		1.31		1.24		0.94		38		1.813		2.033
17:36	4		127		1.34		1.25		0.93		39		1.611		1.726
17:39	4.5		127		1.49		1.38		0.93		42		1.725		1.9
17:41	4.3		127		1.41		1.31		0.93		41		1.743		1.811
17:44	3.5		127		1.18		1.12		0.95		35		1.53		1.922
17:46	4.5		127		1.51		1.39		0.92		45		1.549		1.548
17:48	5.1		127		1.68		1.57		0.94		56		1.49		1.614
17:49	5		129		1.65		1.55		0.94		54		1.475		1.454
17:51	4.4		129		1.45		1.42		0.98		48		1.645		1.852
17:53	4.3		129		1.44		1.4		0.98		49		1.464		1.553
17:56	3.9		129		1.3		1.28		0.99		42		1.792		1.799
17:58	3.9		129		1.28		1.27		0.99		40		1.975		2.184
18:01	4.1		129		1.36		1.31		0.97		41		1.641		1.869
18:03	4.1		129		1.38		1.32		0.96		45		1.356		1.538
18:04	5		129		1.64		1.58		0.96		55		1.636		1.61
18:07	4		129		1.31		1.3		0.99		41		2.004		2.186
18:10	3.9		129		1.3		1.27		0.98		43		1.513		1.844
18:11	4.8		129		1.59		1.53		0.97		53		1.502		1.554
18:13	4.6		129		1.53		1.49		0.97		53		1.513		1.594
18:15	4.6		129		1.51		1.48		0.98		53		1.645		1.675
18:17	4.3		129		1.43		1.43		1		48		1.63		1.756
18:19	4.3		129		1.43		1.42		0.99		51		1.69		1.734
18:21	4.2		129		1.39		1.38		1		49		1.672		1.738
18:23	3.8		129		1.28		1.26		0.99		40		1.739		1.802
18:26	4.2		129		1.39		1.37		0.98		45		1.647		1.829
18:28	4.3		129		1.43		1.39		0.97		47		1.582		1.757
18:30	4.1		131		1.35		1.32		0.98		44		1.62		1.623
18:33	3.9		131		1.28		1.27		1		40		1.915		2.132
18:35	4.5		131		1.49		1.47		0.98		50		1.675		1.832
18:37	4.4		131		1.45		1.43		0.99		50		1.629		1.649
18:39	4.6		131		1.52		1.48		0.97		52		1.627		1.606
18:41	4		131		1.33		1.3		0.98		45		1.5		1.681
18:43	4.5		131		1.48		1.46		0.98		50		1.662		1.701
18:45	4.3		131		1.42		1.39		0.98		47		1.564		1.644
18:47	4.3		131		1.43		1.4		0.98		50		1.568		1.657
18:49	4.1		131		1.37		1.34		0.98		46		1.655		1.621
18:51	4		133		1.33		1.31		0.98		43		1.733		1.795
18:53	4.1		133		1.36		1.34		0.98		43		1.596		1.793
18:55	4.9		133		1.61		1.57		0.98		54		1.668		1.71
18:57	4.7		133		1.55		1.53		0.99		56		1.566		1.661
18:59	4.9		133		1.64		1.64		1		59		1.649		1.662
19:01	4.1		134		1.35		1.36		1.01		48		1.58		1.652
19:03	3.8		134		1.25		1.25		1		43		1.501		1.69
19:05	4.4		134		1.45		1.44		0.99		48		1.587		1.531
19:07	4.5		134		1.49		1.47		0.99		50		1.711		1.743
19:08	4.4		134		1.45		1.44		0.99		51		1.475		1.662
19:10	5		134		1.65		1.66		1.01		60		1.607		1.671
19:11	4.9		134		1.62		1.63		1.01		61		1.391		1.503
19:13	4.7		134		1.56		1.6		1.02		60		1.41		1.519
19:14	4.7		134		1.56		1.61		1.03		62		1.459		1.466
19:16	4.6		134		1.53		1.6		1.05		61		1.427		1.574
19:17	4.4		134		1.45		1.52		1.05		59		1.393		1.489
19:19	4.6		134		1.53		1.59		1.04		59		1.501		1.436
19:20	4.1		134		1.37		1.43		1.05		58		1.404		1.635
19:22	3.7		134		1.24		1.29		1.04		49		1.376		1.483
19:23	4.6		134		1.53		1.57		1.03		56		1.595		1.569
19:25	4.7		134		1.56		1.61		1.03		62		1.4		1.672
19:26	4.7		134		1.56		1.65		1.05		62		1.348		1.425
19:27	4.4		134		1.47		1.54		1.04		58		1.366		1.439
19:29	4.4		134		1.45		1.52		1.05		58		1.4		1.527
19:30	4.4		133		1.47		1.55		1.05		60		1.3		1.438
19:32	4.5		133		1.48		1.55		1.05		58		1.47		1.446
19:33	4.2		133		1.4		1.46		1.04		53		1.301		1.423
19:35	4.4		133		1.45		1.53		1.05		58		1.326		1.553
19:36	4.3		133		1.42		1.48		1.04		54		1.468		1.441
19:38	4.4		133		1.46		1.51		1.03		55		1.385		1.54
19:39	4.4		133		1.46		1.52		1.04		59		1.515		1.611
19:41	4.5		133		1.51		1.57		1.04		61		1.438		1.565
19:42	4.5		133		1.5		1.57		1.05		62		1.366		1.482
19:43	4.6		133		1.53		1.62		1.06		61		1.508		1.461
19:45	4.2		133		1.38		1.47		1.06		56		1.425		1.713
19:46	4.6		133		1.52		1.61		1.06		60		1.41		1.458
19:48	4.5		133		1.5		1.61		1.08		65		1.436		1.563
19:49	4.6		133		1.51		1.62		1.07		64		1.469		1.506
19:50	4.4		133		1.46		1.58		1.09		64		1.401		1.559
19:52	4.2		133		1.38		1.49		1.08		57		1.526		1.478
19:54	4.1		133		1.37		1.47		1.08		53		1.535		1.713
19:55	4.6		133		1.53		1.63		1.07		64		1.435		1.516
19:57	4.1		133		1.38		1.47		1.07		56		1.505		1.513
19:58	4.2		133		1.39		1.49		1.07		58		1.515		1.725
20:00	4.4		133		1.48		1.58		1.07		61		1.595		1.573
20:01	4.2		133		1.4		1.5		1.07		58		1.436		1.611
20:03	4.4		133		1.45		1.56		1.07		61		1.419		1.48
20:04	4.4		133		1.44		1.55		1.07		62		1.361		1.498
20:05	4.3		133		1.43		1.52		1.07		61		1.36		1.455
20:07	4.4		133		1.45		1.6		1.1		65		1.465		1.574
20:08	4.4		133		1.46		1.59		1.08		63		1.53		1.572
20:10	4.3		134		1.43		1.55		1.08		63		1.621		1.649
20:11	4.5		134		1.5		1.63		1.09		69		1.409		1.576
20:12	4.1		134		1.37		1.5		1.09		59		1.315		1.477
20:14	4.2		134		1.41		1.54		1.1		64		1.402		1.55
20:15	4.3		134		1.44		1.56		1.09		62		1.309		1.344
20:16	4.3		134		1.43		1.58		1.1		64		1.279		1.386
20:17	4.7		134		1.55		1.71		1.1		69		1.513		1.479
20:19	4.4		134		1.47		1.63		1.11		67		1.456		1.495
20:20	4.5		136		1.5		1.65		1.1		67		1.509		1.537
20:21	4.7		136		1.54		1.7		1.1		73		1.45		1.567
20:23	4.4		136		1.45		1.62		1.12		69		1.475		1.539
20:24	4.5		136		1.49		1.67		1.12		70		1.599		1.548
20:25	4.4		136		1.47		1.65		1.12		72		1.496		1.649
20:26	4.4		136		1.46		1.65		1.13		72		1.479		1.583
20:28	4.5		136		1.48		1.67		1.12		72		1.481		1.467
20:29	4.5		136		1.48		1.66		1.12		72		1.551		1.615
20:30	4.1		137		1.37		1.54		1.12		65		1.477		1.571
20:32	4.4		137		1.47		1.66		1.13		69		1.588		1.672
20:33	4.4		137		1.45		1.63		1.13		70		1.398		1.552
20:34	4.6		139		1.51		1.71		1.13		68		1.658		1.6
20:36	4.5		139		1.48		1.68		1.13		71		1.536		1.744
20:37	4.6		139		1.51		1.73		1.14		73		1.454		1.544
20:38	4.6		139		1.52		1.75		1.15		73		1.529		1.529
20:39	4.5		139		1.48		1.7		1.14		72		1.429		1.453
20:41	4.6		139		1.51		1.75		1.16		74		1.523		1.549
20:42	4.4		139		1.47		1.71		1.17		71		1.598		1.632
20:43	4.1		139		1.38		1.62		1.18		72		1.505		1.636
20:44	4.3		139		1.44		1.7		1.18		74		1.462		1.522
20:45	4.6		139		1.52		1.79		1.17		77		1.339		1.445
20:46	4.6		139		1.54		1.82		1.18		80		1.506		1.52
20:48	4.2		139		1.39		1.65		1.19		68		1.411		1.423
20:48	Recovery
20:49	4.6		139		1.51		1.8		1.19		75		1.608		1.735
20:50	4.6		141		1.52		1.82		1.2		79		1.562		1.56
20:51	4.4		141		1.46		1.76		1.2		77		1.471		1.535
20:53	4.5		141		1.51		1.79		1.19		73		1.484		1.37
20:54	4.5		141		1.49		1.76		1.18		75		1.467		1.56
20:55	4.5		141		1.49		1.76		1.18		71		1.536		1.439
20:56	4.5		141		1.48		1.76		1.18		72		1.569		1.649
20:58	4.5		141		1.48		1.75		1.19		72		1.518		1.511
20:59	4.6		141		1.53		1.81		1.18		72		1.646		1.609
21:00	4.6		141		1.52		1.8		1.18		69		1.61		1.68
21:02	4.6		141		1.52		1.8		1.19		70		1.514		1.528
21:03	4.5		141		1.5		1.79		1.19		68		1.517		1.488
21:04	4.3		137		1.42		1.67		1.18		64		1.51		1.528
21:06	4.4		137		1.46		1.71		1.17		65		1.607		1.584
21:07	4.7		137		1.55		1.82		1.17		69		1.504		1.613
21:08	4.8		137		1.59		1.89		1.18		78		1.385		1.446
21:10	4.5		136		1.49		1.77		1.19		69		1.549		1.376
21:11	4.7		136		1.57		1.86		1.18		72		1.559		1.461
21:12	4.7		136		1.55		1.85		1.19		72		1.433		1.552
21:13	4.5		136		1.49		1.75		1.18		69		1.297		1.337
21:14	4.5		133		1.49		1.79		1.2		71		1.506		1.544
21:16	4.1		133		1.35		1.62		1.2		57		1.635		1.753
21:17	4.4		133		1.46		1.73		1.18		65		1.362		1.422
21:19	4.5		133		1.51		1.79		1.19		68		1.421		1.479
21:20	4.2		131		1.41		1.68		1.19		66		1.441		1.492
21:22	4.3		131		1.43		1.7		1.19		62		1.711		1.692
21:23	4		131		1.33		1.58		1.18		60		1.329		1.581
21:24	4.3		131		1.42		1.69		1.19		64		1.338		1.405
21:25	4.3		131		1.41		1.68		1.19		66		1.347		1.431
21:27	4.4		131		1.47		1.74		1.19		69		1.34		1.491
21:28	4.3		131		1.44		1.72		1.19		69		1.2		1.329
21:29	4.6		131		1.52		1.82		1.2		67		1.408		1.398
21:31	4.3		130		1.42		1.71		1.21		62		1.616		1.804
21:32	4.2		130		1.41		1.7		1.21		66		1.462		1.616
21:33	4.5		130		1.48		1.79		1.21		71		1.447		1.528
21:35	3.1		129		1.02		1.21		1.18		47		1.182		1.288
21:36	4.6		129		1.53		1.81		1.18		70		1.365		1.384
21:37	4.3		129		1.44		1.71		1.19		67		1.327		1.421
21:38	4.3		129		1.42		1.71		1.2		69		1.274		1.427
21:39	4.2		127		1.39		1.65		1.19		62		1.277		1.27
21:41	4		127		1.34		1.61		1.2		64		1.348		1.391
21:42	4.3		127		1.44		1.73		1.2		65		1.494		1.56
21:43	4		127		1.34		1.62		1.21		62		1.4		1.528
21:45	3.9		126		1.31		1.58		1.21		58		1.403		1.507
21:46	3.9		126		1.31		1.57		1.2		60		1.316		1.427
21:47	3.7		126		1.22		1.46		1.2		60		1.2		1.355
21:48	3.7		126		1.24		1.5		1.21		58		1.202		1.189
21:50	3.9		126		1.29		1.56		1.21		59		1.472		1.509
21:52	4		126		1.32		1.59		1.21		60		1.587		1.664
21:53	3.8		126		1.26		1.53		1.21		60		1.259		1.536
21:54	3.9		126		1.3		1.59		1.22		62		1.223		1.242
21:55	3.8		126		1.27		1.55		1.22		60		1.29		1.342
21:57	3.7		126		1.23		1.51		1.22		60		1.29		1.433
21:58	3.8		126		1.26		1.55		1.23		62		1.335		1.389
21:59	3.7		125		1.22		1.5		1.23		60		1.303		1.392
22:00	3.7		125		1.24		1.53		1.24		61		1.314		1.439
22:02	3.7		125		1.22		1.5		1.23		62		1.284		1.356
22:03	3.7		125		1.23		1.51		1.23		58		1.353		1.4
22:05	3.6		125		1.19		1.48		1.24		54		1.799		1.802
22:07	3.6		125		1.18		1.45		1.22		52		1.754		1.862
22:09	3.6		125		1.2		1.46		1.21		57		1.363		1.62
22:10	3.7		123		1.21		1.46		1.2		58		1.221		1.299
22:11	3.7		123		1.22		1.48		1.21		60		1.162		1.245
22:12	3.5		123		1.17		1.41		1.2		55		1.245		1.371
22:14	3.5		123		1.15		1.38		1.2		54		1.222		1.355
22:15	4.1		122		1.37		1.66		1.21		65		1.373		1.46
22:16	4.1		122		1.37		1.68		1.22		65		1.545		1.577
22:18	3.8		122		1.27		1.56		1.23		65		1.391		1.654
22:19	3.6		122		1.21		1.5		1.24		60		1.273		1.42
22:20	3.7		121		1.23		1.53		1.24		65		1.4		1.512
22:21	3.5		121		1.15		1.44		1.25		63		1.31		1.388
22:23	3.6		121		1.2		1.51		1.26		65		1.614		1.701
22:25	3.5		121		1.16		1.47		1.27		63		1.627		1.747
22:26	3.4		121		1.14		1.45		1.27		65		1.443		1.676
22:27	3.6		121		1.18		1.52		1.29		69		1.443		1.494
22:28	3.6		121		1.21		1.54		1.28		71		1.343		1.429
22:29	3.3		121		1.08		1.39		1.28		64		1.254		1.29
22:31	3.4		121		1.13		1.47		1.3		65		1.381		1.479
22:32	3.6		121		1.19		1.55		1.31		67		1.485		1.575
22:33	3.5		121		1.15		1.48		1.28		63		1.506		1.537
22:36	3.3		120		1.08		1.4		1.3		52		2.148		2.122
22:38	3.2		120		1.08		1.35		1.25		50		1.702		1.783
22:40	3.3		118		1.1		1.35		1.23		54		1.467		1.709
22:41	3.4		118		1.13		1.4		1.23		57		1.331		1.493
22:42	3.6		118		1.19		1.46		1.23		59		1.421		1.514
22:44	3.6		118		1.18		1.46		1.23		58		1.451		1.565
22:46	3.3		117		1.1		1.36		1.23		54		1.493		1.626
22:47	3.4		117		1.13		1.4		1.24		60		1.387		1.579
22:48	3.4		117		1.14		1.42		1.24		62		1.415		1.477
22:50	3.1		116		1.04		1.29		1.24		55		1.391		1.449
22:51	2.6		116		0.87		1.06		1.21		44		1.222		1.321
22:53	3.1		116		1.01		1.22		1.21		49		1.342		1.26
22:55	2.4		116		0.8		0.94		1.18		40		1.042		1.264
22:57			116						1.12						1.301
23:13			112
23:29			110
23:44			108
24:00			107
24:16			105
24:32			106
24:48			108
	3.81704	0.536091	122.909	124.851	1.26589	0.0590524	1.27088	0.128457	0.99065	0.0252532	47.5714	246.537	1.39256	0.0732238	1.47758	0.0850521
	METS						HR						VO2						VCO2						RER						VE						Vtex						Vtin						LABEL
	Rest		Test		Recovery		Rest		Test		Recovery		Rest		Test		Recovery		Rest		Test		Recovery		Rest		Test		Recovery		Rest		Test		Recovery		Rest		Test		Recovery		Rest		Test		Recovery
	MEDIA	VAR	MEDIA	VAR	MEDIA	VAR	MEDIA	VAR	MEDIA	VAR	MEDIA	VAR	MEDIA	VAR	MEDIA	VAR	MEDIA	VAR	MEDIA	VAR	MEDIA	VAR	MEDIA	VAR	MEDIA	VAR	MEDIA	VAR	MEDIA	VAR	MEDIA	VAR	MEDIA	VAR	MEDIA	VAR	MEDIA	VAR	MEDIA	VAR	MEDIA	VAR	MEDIA	VAR	MEDIA	VAR	MEDIA	VAR	BIN
	1.09126	0.218256	3.77843	0.614484	3.94409	0.260753	82.95	81.8258	121.82	135.951	126.208	77.6263	0.362136	0.0239483	1.25281	0.0676898	1.30892	0.0286184	0.305534	0.0169387	1.17503	0.118207	1.58624	0.0327476	0.844369	0.00362092	0.922484	0.012864	1.21255	0.00109664	12.5631	19.621	42.817	208.484	63.2151	52.8011	0.741495	0.11923	1.3832	0.0872432	1.42337	0.0262916	0.775563	0.122272	1.47092	0.103577	1.49927	0.0245908	0
	1.09126	0.218256	3.77843	0.614484	3.94409	0.260753	82.95	81.8258	121.82	135.951	126.208	77.6263	0.362136	0.0239483	1.25281	0.0676898	1.30892	0.0286184	0.305534	0.0169387	1.17503	0.118207	1.58624	0.0327476	0.844369	0.00362092	0.922484	0.012864	1.21255	0.00109664	12.5631	19.621	42.817	208.484	63.2151	52.8011	0.741495	0.11923	1.3832	0.0872432	1.42337	0.0262916	0.775563	0.122272	1.47092	0.103577	1.49927	0.0245908	0
[truncated: 1 more columns]
