# Supplementary material for: On the development of diagnostic support algorithms based on CPET biosignals data via machine learning and wavelets
Source: PeerJ journal article supplement (doi:10.7717/peerj-cs.2474), 2025-01-30
Supplement: raw_data.zip [file Subject11_BxB.xlsx]

## Sheet: Demographics
Gender:	Male
Age:	83
Height (cm):	173
Weight (kg):	108.7
BMI:	36
Condition:	HFrEf

## Sheet: Subject11_BxB
Time	METS		HR		V'O2		V'CO2		RER		V'E		VTex		VTin
min			1/min		L/min		L/min				L/min		L		L
00:00	Rest
00:02	1.9				0.71		0.58		0.82		25		0.824
00:05	1.6		116		0.6		0.5		0.83		21		1.008		1.156
00:08	1.5		116		0.56		0.48		0.85		20		1.061		0.941
00:11	1.2		116		0.46		0.39		0.84		18		0.816		0.737
00:13	1.1		116		0.44		0.37		0.85		18		0.744		0.731
00:15	1.6		116		0.6		0.49		0.81		21		0.711		0.457
00:18	1.4		116		0.54		0.43		0.79		19		0.756		0.535
00:20	1.4		116		0.52		0.41		0.8		19		0.78		0.722
00:22	0.8		0		0.3		0.24		0.78		14		0.445		0.503
00:25	1.5		60		0.56		0.45		0.81		20		0.88		0.706
00:27	1.2		60		0.47		0.38		0.8		18		0.746		0.674
00:30	1.4		60		0.53		0.43		0.81		19		0.828		0.783
00:32	1.6		60		0.61		0.5		0.82		22		0.954		0.825
00:35	1.5		60		0.59		0.49		0.83		22		1.005		0.881
00:38	1.3		60		0.5		0.42		0.83		20		0.865		0.736
00:40	1.2		60		0.47		0.4		0.85		19		0.83		0.763
00:43	1.3		60		0.5		0.41		0.82		20		0.821		0.673
00:45	1.3		60		0.5		0.42		0.85		20		0.859		0.801
00:48	1.2		60		0.47		0.39		0.84		19		0.815		0.707
00:50	1.9		60		0.72		0.59		0.82		25		1.001		0.684
00:53	1		60		0.38		0.31		0.81		16		0.676		0.632
00:55	1.1		60		0.43		0.35		0.82		18		0.708		0.719
00:55	Test
00:58	1.1		60		0.44		0.36		0.82		18		0.725		0.609
01:00	1.3		60		0.5		0.42		0.83		20		0.828		0.768
01:03	1.7		60		0.63		0.51		0.81		22		0.87		0.616
01:05	1.6		60		0.61		0.49		0.81		22		0.871		0.717
01:07	1.6		60		0.62		0.51		0.82		22		0.951		0.772
01:10	0.9		60		0.36		0.3		0.84		18		0.624		0.83
01:13	1.4		60		0.52		0.44		0.84		19		0.983		0.722
01:15	1.8		60		0.68		0.56		0.82		25		0.942		0.759
01:17	1.8		60		0.7		0.57		0.82		26		0.923		0.733
01:19	1.7		60		0.64		0.53		0.82		24		0.876		0.712
01:21	1.7		60		0.63		0.51		0.82		24		0.856		0.692
01:23	1.6		60		0.59		0.49		0.82		24		0.844		0.747
01:26	1.7		60		0.63		0.53		0.84		24		1.097		0.944
01:29	1.6		60		0.59		0.5		0.85		22		1.068		0.99
01:31	1.5		62		0.57		0.49		0.86		24		0.905		0.873
01:34	1.7		62		0.66		0.57		0.87		25		1.095		0.852
01:37	1.7		62		0.66		0.56		0.85		25		1.131		0.863
01:39	1.6		62		0.6		0.52		0.86		24		1.029		0.973
01:42	1.7		62		0.63		0.54		0.86		24		1.035		0.907
01:44	1.6		62		0.61		0.52		0.84		25		0.941		0.838
01:46	1.8		60		0.69		0.58		0.84		26		1.094		0.873
01:49	1.8		60		0.69		0.58		0.84		26		1.171		0.993
01:52	1.5		60		0.57		0.47		0.84		23		0.995		0.958
01:54	1.6		60		0.59		0.47		0.8		24		0.78		0.578
01:56	1.9		60		0.72		0.59		0.83		27		1.135		1.046
01:59	1.9		60		0.71		0.59		0.83		27		1.113		0.99
02:01	1.8		60		0.7		0.57		0.81		28		1.019		0.871
02:04	1.9		60		0.7		0.58		0.83		27		1.16		1.029
02:07	2		60		0.74		0.62		0.84		27		1.359		1.186
02:09	1.9		60		0.71		0.61		0.85		27		1.285		1.388
02:13	1.4		60		0.54		0.46		0.84		19		1.214		1.102
02:15	2.2		60		0.84		0.69		0.82		31		1.218		1.069
02:19	1.9		60		0.74		0.61		0.83		26		1.48		1.121
02:21	1.8		60		0.67		0.56		0.84		28		1.077		1.228
02:23	2		60		0.77		0.64		0.83		32		1.065		0.927
02:25	2		60		0.75		0.63		0.84		30		1.105		1.013
02:28	1.9		60		0.72		0.61		0.84		30		1.122		1.038
02:30	1.9		60		0.71		0.61		0.86		30		1.183		1.182
02:32	2		60		0.74		0.65		0.87		32		1.187		1.088
02:35	2.1		60		0.8		0.7		0.87		32		1.322		1.141
02:36	1.8		60		0.7		0.57		0.81		29		0.841		0.68
02:39	2		60		0.77		0.64		0.83		30		1.075		1.009
02:41	2		62		0.77		0.65		0.84		29		1.179		1.102
02:43	2.2		62		0.83		0.71		0.85		33		1.326		1.159
02:46	1.9		64		0.73		0.62		0.85		31		1.135		1.042
02:48	2.1		64		0.79		0.67		0.85		31		1.207		0.992
02:50	2		67		0.78		0.67		0.86		31		1.225		1.14
02:53	2.1		67		0.78		0.67		0.86		32		1.164		1.053
02:55	2		65		0.77		0.67		0.86		31		1.205		1.054
02:57	1.9		65		0.74		0.65		0.87		32		1.149		1.022
02:59	2		64		0.76		0.67		0.89		32		1.205		1.077
03:02	1.9		64		0.73		0.64		0.87		31		1.173		1.048
03:04	2		64		0.76		0.66		0.87		33		1.108		0.973
03:06	2.2		65		0.85		0.75		0.88		34		1.262		1.067
03:08	1.9		65		0.72		0.63		0.87		31		1.028		0.897
03:10	2.2		66		0.82		0.73		0.89		34		1.26		1.165
03:12	2.2		66		0.84		0.75		0.89		35		1.268		1.115
03:15	2.3		67		0.87		0.78		0.9		35		1.371		1.197
03:17	2		67		0.76		0.69		0.92		34		1.24		1.228
03:19	2		67		0.76		0.69		0.92		35		1.18		1.072
03:21	1.9		67		0.71		0.65		0.92		34		1.058		0.956
03:22	2		67		0.78		0.71		0.91		35		1.095		0.976
03:24	2		66		0.76		0.69		0.91		35		1.09		0.993
03:26	2.1		66		0.79		0.73		0.92		36		1.186		1.051
03:28	2		66		0.76		0.71		0.94		35		1.22		1.096
03:31	2		66		0.76		0.71		0.94		35		1.279		1.173
03:33	2		66		0.75		0.7		0.94		36		1.114		1.043
03:34	1.8		66		0.69		0.64		0.93		33		1.07		0.977
03:36	1.9		66		0.73		0.68		0.93		35		1.129		1.046
03:39	1.9		66		0.74		0.69		0.94		32		1.268		1.091
03:39	Recovery
03:41	2.2		66		0.82		0.76		0.93		33		1.114		1.184
03:43	2.3		66		0.89		0.85		0.95		43		1.243		1.31
03:44	1.9		66		0.73		0.72		0.98		40		1.012		1.191
03:46	2.3		66		0.87		0.86		0.99		42		1.245		1.187
03:48	2.2		66		0.82		0.83		1.01		38		1.447		1.333
03:52	1.8		68		0.67		0.68		1.02		27		1.895		1.83
03:55	2		66		0.76		0.75		0.99		32		1.235		1.167
03:58	1.7		66		0.66		0.65		0.98		24		1.117		1.19
04:00	1.4		66		0.54		0.51		0.94		23		0.761		0.771
04:02	2.4		66		0.91		0.88		0.96		36		1.264		1.137
04:04	2.6		66		0.98		0.94		0.96		39		1.403		1.181
04:06	2.4		65		0.92		0.9		0.97		37		1.262		1.164
04:08	2.2		65		0.83		0.83		0.99		37		1.178		1.126
04:10	2.2		65		0.83		0.83		1		35		1.164		1.049
04:12	1.9		65		0.71		0.71		1		31		0.994		1.002
04:14	1.6		65		0.63		0.63		1		31		0.926		0.95
04:15	2.1		64		0.78		0.79		1		34		1.051		0.997
04:18	2.4		64		0.92		0.94		1.02		38		1.43		1.347
04:20	2		63		0.78		0.8		1.03		37		1.207		1.162
04:22	1.9		63		0.71		0.75		1.06		35		1.231		1.234
04:24	2.1		63		0.79		0.85		1.06		37		1.28		1.233
04:26	2.3		65		0.89		0.95		1.06		38		1.409		1.155
04:28	2		65		0.77		0.82		1.06		35		1.14		1.043
04:30	2.2		65		0.83		0.89		1.07		36		1.411		1.29
04:33	2.1		65		0.78		0.83		1.06		35		1.337		1.088
04:35	2		63		0.77		0.84		1.1		34		1.5		1.361
04:38	1.8		63		0.68		0.74		1.08		32		1.217		1.114
04:40	1.8		63		0.69		0.73		1.06		31		1.162		0.965
04:42	1.6		63		0.6		0.63		1.05		30		0.88		0.924
04:44	2		63		0.75		0.78		1.05		32		1.115		0.895
04:45	1.8		65		0.69		0.71		1.03		31		0.942		0.78
04:48	2		65		0.74		0.77		1.04		31		1.246		0.984
04:50	1.9		66		0.74		0.79		1.06		32		1.348		1.292
04:53	2		66		0.75		0.77		1.04		32		1.103		0.957
04:54	1.7		66		0.65		0.68		1.04		30		0.994		0.973
04:57	1.5		66		0.57		0.6		1.04		24		0.834		0.779
04:58	1.8		66		0.7		0.73		1.04		31		0.981		1.003
05:00	1.4		66		0.55		0.58		1.06		32		0.828		0.881
05:03	1.5		66		0.58		0.61		1.04		24		1.19		0.825
05:05	1.6		66		0.59		0.61		1.03		28		0.777		0.892
05:07	2.3		66		0.87		0.9		1.04		36		1.316		0.943
05:09	1.6		66		0.6		0.62		1.04		30		0.886		1.004
05:10	1.6		66		0.61		0.63		1.04		28		0.692		0.606
05:12	1.5		66		0.59		0.61		1.04		29		0.814		0.735
05:14	1.8		66		0.7		0.72		1.03		30		1.064		0.803
05:17	1.9		66		0.74		0.77		1.05		30		1.431		1.222
05:19	1.3		66		0.49		0.51		1.05		27		0.839		0.958
05:20	1.4		66		0.55		0.58		1.05		27		0.774		0.746
05:22	1.5		66		0.56		0.59		1.06		29		0.798		0.744
05:24	1.3		66		0.49		0.52		1.06		28		0.848		0.802
05:27	1.9		66		0.71		0.75		1.05		29		1.269		1.024
05:30	1.7		66		0.65		0.7		1.07		27		1.421		1.211
05:33	1.6		66		0.6		0.64		1.06		25		1.254		1.137
05:35	1.5		66		0.58		0.61		1.05		26		1.093		0.953
05:38	1.6		66		0.61		0.63		1.04		26		1.163		0.926
05:41	1.6		66		0.6		0.65		1.07		27		1.18		1.099
05:43	1.3		66		0.49		0.52		1.05		26		0.85		0.838
05:44	1		66		0.39		0.4		1.03		22		0.664		0.681
05:46	1.2		66		0.46		0.48		1.05		24		0.748		0.723
06:02			66
06:18			66
06:33			66
	1.83798	#NAME?	63.7879	6.90123	0.698682	0.0127881	0.655116	0.0156486	0.937132	0.0087378	29.8527	26.4703	1.10671	0.041429	1.00258	0.0371832
	METS						HR						VO2						VCO2						RER						VE						Vtex						Vtin						LABEL
	Rest		Test		Recovery		Rest		Test		Recovery		Rest		Test		Recovery		Rest		Test		Recovery		Rest		Test		Recovery		Rest		Test		Recovery		Rest		Test		Recovery		Rest		Test		Recovery
	MEDIA	VAR	MEDIA	VAR	MEDIA	VAR	MEDIA	VAR	MEDIA	VAR	MEDIA	VAR	MEDIA	VAR	MEDIA	VAR	MEDIA	VAR	MEDIA	VAR	MEDIA	VAR	MEDIA	VAR	MEDIA	VAR	MEDIA	VAR	MEDIA	VAR	MEDIA	VAR	MEDIA	VAR	MEDIA	VAR	MEDIA	VAR	MEDIA	VAR	MEDIA	VAR	MEDIA	VAR	MEDIA	VAR	MEDIA	VAR	BIN
	1.36364	0.0719481	1.84143	0.0653602	1.8339	0.122279	75.8095	1015.16	62.3571	7.62422	65.4032	1.1954	0.520909	0.00954199	0.699571	0.00929402	0.697627	0.0171632	0.428636	0.006479	0.602286	0.00926427	0.717797	0.0161485	0.821818	0.000396537	0.858714	0.00142876	1.03017	0.00135687	19.6818	6.22727	28.5429	24.5126	31.4068	24.7282	0.824227	0.0184798	1.09697	0.0262962	1.11825	0.0598961	0.731714	0.0225132	0.974743	0.0282366	1.03561	0.0464225	0
	1.36364	0.0719481	1.84143	0.0653602	1.8339	0.122279	75.8095	1015.16	62.3571	7.62422	65.4032	1.1954	0.520909	0.00954199	0.699571	0.00929402	0.697627	0.0171632	0.428636	0.006479	0.602286	0.00926427	0.717797	0.0161485	0.821818	0.000396537	0.858714	0.00142876	1.03017	0.00135687	19.6818	6.22727	28.5429	24.5126	31.4068	24.7282	0.824227	0.0184798	1.09697	0.0262962	1.11825	0.0598961	0.731714	0.0225132	0.974743	0.0282366	1.03561	0.0464225	0
[truncated: 1 more columns]
