# Supplementary material for: On the development of diagnostic support algorithms based on CPET biosignals data via machine learning and wavelets
Source: PeerJ journal article supplement (doi:10.7717/peerj-cs.2474), 2025-01-30
Supplement: raw_data.zip [file Subject12_BxB.xlsx]

## Sheet: Demographics
Gender:	Male
Age:	77
Height (cm):	170
Weight (kg):	93.9
BMI:	32
Condition:	HFrEf

## Sheet: Subject12_BxB
Time	METS		HR		V'O2		V'CO2		RER		V'E		VTex		VTin
min			1/min		L/min		L/min				L/min		L		L
00:00	Rest
01:28
01:30	0.9		68		0.29		0.28		0.98		9		0.316		0.18
01:32	0.9		68		0.3		0.29		0.96		13		0.436		0.574
01:34	1.4		68		0.45		0.43		0.96		17		0.685		0.568
01:38	2.3		68		0.76		0.75		0.99		27		1.601		1.563
01:41	1.6		65		0.52		0.53		1.03		21		1.151		1.155
01:44	1.4		65		0.45		0.46		1.04		19		0.923		0.961
01:47	1.1		63		0.35		0.35		1.01		16		0.678		0.578
01:49	0.9		63		0.3		0.3		1.01		14		0.567		0.582
01:51	1.1		62		0.36		0.36		1.01		16		0.651		0.648
01:56	1.2		63		0.38		0.39		1.02		14		1.116		1.007
01:59	1		63		0.32		0.32		0.99		14		0.592		0.697
02:01	0.9		64		0.31		0.29		0.94		13		0.423		0.35
02:04	1.3		64		0.44		0.44		1		16		0.887		0.924
02:05	0.6		65		0.2		0.19		0.94		8		0.196		0.125
02:10	1.2		67		0.38		0.36		0.95		13		0.95		0.742
02:12	0.2		67		0.06		0.04		0.74		7		0.207		0.391
02:14	0.7		67		0.22		0.18		0.83		11		0.321		0.427
02:16	1.7		67		0.55		0.47		0.84		19		0.631		0.81
02:16	Test
02:17	1.3		67		0.42		0.35		0.82		15		0.475		0.45
02:19	1.4		67		0.47		0.39		0.82		16		0.541		0.57
02:21	1.7		67		0.55		0.46		0.83		18		0.652		0.62
02:23	1		67		0.32		0.25		0.8		11		0.29		0.244
02:25	1.7		68		0.55		0.45		0.82		18		0.648		0.833
02:28	2.4		68		0.8		0.65		0.82		24		0.911		0.845
02:30	2.7		69		0.88		0.74		0.84		26		0.992		1.076
02:32	2.5		69		0.83		0.68		0.82		25		0.813		0.83
02:33	2.1		69		0.69		0.56		0.81		23		0.615		0.712
02:35	2.6		73		0.87		0.71		0.81		25		0.803		0.688
02:38	2.7		73		0.88		0.72		0.81		25		0.9		0.843
02:40	2.7		80		0.9		0.74		0.82		26		0.969		0.978
02:42	2.6		80		0.85		0.7		0.81		26		0.876		0.857
02:44	2.8		80		0.92		0.76		0.83		26		1.011		0.975
02:46	3		83		0.97		0.83		0.85		29		1.127		1.159
02:48	2.5		83		0.82		0.7		0.85		26		0.858		0.9
02:51	2.9		86		0.94		0.82		0.87		29		1.096		1.081
02:53	2.5		86		0.84		0.74		0.88		27		1.013		1.002
02:55	2.6		88		0.84		0.75		0.89		26		1.062		1.064
02:57	2.1		88		0.69		0.6		0.87		22		0.742		0.786
03:00	2.5		89		0.81		0.68		0.85		25		0.885		0.824
03:02	2.8		89		0.93		0.79		0.86		27		1.085		1.129
03:04	2.7		89		0.9		0.76		0.85		26		0.946		0.981
03:06	2.8		90		0.92		0.76		0.83		28		0.913		0.955
03:08	2.9		90		0.96		0.78		0.82		26		0.964		0.936
03:10	2.9		90		0.94		0.75		0.8		27		0.891		0.927
03:12	3		90		0.98		0.76		0.78		28		0.891		0.896
03:14	3		90		0.99		0.76		0.77		28		0.834		0.835
03:16	2.9		90		0.95		0.71		0.75		25		0.765		0.685
03:18	2.6		90		0.85		0.62		0.73		24		0.65		0.707
03:20	3.6		90		1.17		0.86		0.74		28		1.018		0.978
03:22	3.9		90		1.28		0.97		0.76		32		1.176		1.249
03:24	3.8		90		1.26		0.97		0.77		31		1.264		1.356
03:27	3.8		90		1.25		0.97		0.78		32		1.229		1.34
03:29	4		90		1.3		1.01		0.78		35		1.169		1.15
03:31	4		92		1.32		1.04		0.79		37		1.253		1.281
03:33	3.7		92		1.21		0.97		0.8		34		1.236		1.278
03:35	3.7		94		1.23		1		0.81		34		1.108		1.163
03:37	3.5		94		1.16		0.92		0.79		31		0.935		0.96
03:39	3.2		94		1.07		0.85		0.79		28		1.027		1.023
03:41	3.4		96		1.11		0.87		0.79		30		0.964		0.991
03:43	4		96		1.3		1.02		0.78		34		1.215		1.17
03:45	4		97		1.3		1.04		0.8		35		1.307		1.344
03:47	3.9		97		1.28		1.03		0.81		35		1.264		1.306
03:50	3.8		98		1.24		1.01		0.82		34		1.296		1.344
03:52	3.6		98		1.17		0.96		0.81		32		1.2		1.203
03:54	3.8		98		1.26		1.03		0.82		34		1.204		1.311
03:56	3.8		99		1.26		1.01		0.8		35		1.136		1.129
03:58	3.8		99		1.27		1.03		0.81		35		1.16		1.194
04:00	3.9		100		1.28		1.04		0.82		37		1.135		1.223
04:02	3.9		100		1.28		1.04		0.81		35		1.184		1.103
04:04	4		100		1.3		1.07		0.82		35		1.266		1.277
04:07	3.8		100		1.26		1.05		0.84		34		1.389		1.383
04:09	3.6		100		1.17		0.97		0.83		33		1.18		1.228
04:10	3.3		99		1.07		0.87		0.81		33		0.9		1.031
04:12	3.5		99		1.16		0.93		0.8		32		1.009		0.885
04:14	2.7		99		0.9		0.71		0.78		27		0.715		0.778
04:16	3.3		99		1.09		0.84		0.77		29		0.869		0.76
04:17	3.8		99		1.24		0.95		0.76		33		0.901		0.974
04:19	4.1		98		1.35		1.03		0.77		33		1.093		1.059
04:21	4		98		1.3		1		0.77		34		1.136		1.135
04:23	4		98		1.33		1.04		0.78		35		1.125		1.204
04:25	4.2		97		1.39		1.11		0.8		36		1.294		1.245
04:27	4.1		97		1.34		1.07		0.8		37		1.186		1.255
04:29	3.7		97		1.22		0.97		0.8		35		0.999		1.059
04:31	4.2		96		1.37		1.1		0.8		38		1.128		1.097
04:32	3.5		96		1.16		0.92		0.8		35		0.917		0.959
04:34	4.2		96		1.38		1.11		0.8		38		1.144		1.103
04:36	4.2		97		1.4		1.15		0.82		38		1.383		1.402
04:38	3.9		97		1.27		1.04		0.82		35		1.192		1.134
04:40	3.9		97		1.28		1.05		0.82		37		1.072		1.23
04:42	4.5		97		1.47		1.22		0.83		41		1.422		1.353
04:44	3.8		96		1.26		1.06		0.84		36		1.372		1.345
04:47	3.8		96		1.25		1.05		0.84		36		1.293		1.274
04:49	3.6		96		1.19		1		0.84		34		1.244		1.314
04:51	3.7		96		1.21		1		0.82		35		1.073		1.1
04:53	4.1		96		1.33		1.1		0.83		37		1.198		1.251
04:54	3.6		98		1.19		0.97		0.82		33		0.996		1.04
04:56	4		98		1.33		1.09		0.82		36		1.229		1.228
04:59	4		98		1.31		1.11		0.84		37		1.416		1.488
05:01	3.7		99		1.21		1.01		0.83		35		1.166		1.225
05:03	3.8		99		1.25		1.02		0.81		36		1.056		1.042
05:05	4		99		1.3		1.07		0.82		35		1.228		1.24
05:07	4		99		1.31		1.07		0.82		36		1.18		1.199
05:09	4.2		99		1.37		1.13		0.82		36		1.347		1.319
05:11	3.4		100		1.11		0.91		0.81		30		1.012		1.084
05:13	3.8		100		1.25		1.01		0.81		33		1.138		1.194
05:15	3.5		100		1.15		0.91		0.78		31		0.992		0.981
05:17	3.8		100		1.24		0.97		0.79		34		1.013		1.111
05:18	3.6		100		1.19		0.92		0.77		32		0.979		0.994
05:20	3.9		98		1.27		0.99		0.78		33		1.11		1.083
05:23	4.3		98		1.42		1.12		0.79		35		1.327		1.313
05:25	4.4		99		1.44		1.15		0.8		38		1.277		1.358
05:27	4.5		99		1.49		1.22		0.81		40		1.479		1.539
05:29	4.2		99		1.39		1.14		0.82		38		1.332		1.345
05:31	4.1		100		1.36		1.12		0.83		38		1.196		1.27
05:33	3.8		100		1.26		1.02		0.81		36		0.995		1.023
05:34	4.3		104		1.42		1.17		0.82		40		1.18		1.185
05:36	4.2		104		1.39		1.15		0.83		38		1.292		1.214
05:39	4.2		104		1.36		1.15		0.84		37		1.463		1.508
05:41	3.8		107		1.26		1.07		0.85		36		1.266		1.403
05:43	4		107		1.33		1.12		0.84		37		1.282		1.289
05:45	3.9		107		1.28		1.07		0.83		35		1.295		1.258
05:47	3.9		107		1.27		1.05		0.83		36		1.242		1.319
05:50	4.1		108		1.36		1.13		0.83		36		1.451		1.38
05:52	4		108		1.32		1.1		0.83		36		1.171		1.303
05:53	4.3		108		1.4		1.15		0.82		40		1.136		1.181
05:55	4.6		110		1.53		1.28		0.84		42		1.44		1.406
05:57	4.3		110		1.42		1.21		0.85		40		1.327		1.427
05:59	4.1		111		1.35		1.14		0.84		38		1.28		1.27
06:02	4.3		111		1.4		1.22		0.87		40		1.583		1.675
06:04	4		111		1.32		1.13		0.85		40		1.182		1.274
06:05	4.1		112		1.36		1.14		0.84		38		1.232		1.186
06:08	4.3		112		1.4		1.2		0.86		38		1.359		1.483
06:09	3.7		112		1.22		1.02		0.83		36		0.994		1.045
06:11	3.9		112		1.3		1.08		0.83		36		1.076		1.089
06:13	4.3		112		1.41		1.18		0.84		38		1.289		1.279
06:16	4.1		112		1.36		1.21		0.89		38		1.895		2.097
06:18	3.8		111		1.24		1.04		0.84		38		1.094		1.171
06:20	4.4		110		1.46		1.25		0.85		43		1.257		1.285
06:21	3.7		110		1.21		1.01		0.84		35		1.066		1.018
06:23	3.7		110		1.23		1.01		0.82		36		0.96		0.985
06:25	4.3		111		1.41		1.16		0.82		39		1.151		1.175
06:27	4.2		111		1.39		1.15		0.83		37		1.283		1.241
06:29	4.2		111		1.37		1.14		0.83		37		1.227		1.324
06:31	3.8		109		1.25		1		0.8		34		0.997		0.931
06:33	4.4		109		1.44		1.19		0.82		38		1.314		1.385
06:34	4.1		109		1.36		1.11		0.82		37		1.153		1.197
06:36	4.4		109		1.44		1.18		0.82		38		1.281		1.277
06:38	4.8		109		1.58		1.33		0.84		44		1.519		1.58
06:41	4.1		110		1.34		1.14		0.85		38		1.388		1.459
06:42	3.9		110		1.29		1.07		0.83		38		1.091		1.035
06:44	3.3		110		1.07		0.87		0.81		32		0.79		0.825
06:46	4.5		112		1.49		1.22		0.82		41		1.206		1.261
06:48	4.7		112		1.55		1.26		0.81		41		1.316		1.237
06:50	4.6		112		1.52		1.28		0.84		40		1.52		1.569
06:52	4.7		112		1.53		1.3		0.85		42		1.504		1.617
06:54	4.5		112		1.48		1.27		0.86		42		1.508		1.514
06:56	4.4		113		1.46		1.24		0.85		42		1.287		1.325
06:58	4.6		113		1.5		1.3		0.87		42		1.483		1.561
07:00	4.4		114		1.46		1.25		0.86		43		1.306		1.363
07:02	4.2		114		1.36		1.15		0.84		37		1.333		1.167
07:05	4.5		115		1.48		1.32		0.89		42		1.984		2.264
07:07	4.2		115		1.38		1.21		0.88		42		1.421		1.454
07:09	4.4		115		1.44		1.27		0.88		42		1.441		1.519
07:11	4.1		115		1.36		1.18		0.86		41		1.245		1.28
07:12	4.3		115		1.42		1.2		0.85		41		1.124		1.086
07:14	4.4		115		1.43		1.2		0.84		41		1.138		1.233
07:16	4.4		117		1.45		1.22		0.84		41		1.26		1.257
07:18	4.6		117		1.5		1.29		0.86		42		1.435		1.458
07:20	4.3		117		1.4		1.18		0.84		40		1.117		1.166
07:22	4.8		117		1.57		1.32		0.84		44		1.391		1.421
07:24	4.4		117		1.45		1.27		0.87		42		1.445		1.492
07:26	4.3		118		1.42		1.22		0.86		41		1.293		1.322
07:28	4.3		118		1.4		1.21		0.86		41		1.385		1.417
07:31	4.3		118		1.43		1.27		0.89		40		2.097		2.115
07:34	4.2		118		1.38		1.25		0.9		38		2.107		2.275
07:36	4.4		117		1.44		1.26		0.87		41		1.595		1.676
07:39	4.3		117		1.42		1.23		0.87		40		1.481		1.537
07:41	4.3		117		1.42		1.24		0.87		39		1.447		1.6
07:42	3.6		117		1.19		0.99		0.83		36		0.94		0.915
07:44	5		117		1.65		1.43		0.87		48		1.458		1.613
07:46	3.9		116		1.28		1.08		0.84		38		1.002		0.906
07:48	4.4		116		1.45		1.23		0.84		41		1.236		1.268
07:49	4.7		115		1.53		1.28		0.84		45		1.302		1.319
07:51	4.9		115		1.6		1.34		0.84		44		1.394		1.347
07:53	4.6		115		1.51		1.27		0.84		43		1.374		1.409
07:55	4.9		113		1.61		1.38		0.86		46		1.431		1.509
07:57	4.7		113		1.53		1.29		0.84		43		1.319		1.325
07:59	4.6		113		1.5		1.27		0.85		42		1.303		1.335
08:01	4.5		113		1.48		1.26		0.85		42		1.294		1.398
08:03	4.8		113		1.59		1.37		0.86		46		1.525		1.513
08:05	4.6		114		1.52		1.35		0.89		44		1.595		1.623
08:07	4.6		114		1.5		1.33		0.89		45		1.565		1.63
08:09	4.5		114		1.46		1.29		0.88		45		1.349		1.422
08:10	4.4		116		1.44		1.27		0.88		42		1.342		1.339
08:12	4.1		116		1.34		1.17		0.87		41		1.164		1.254
08:14	4.1		116		1.36		1.16		0.86		40		1.092		1.075
08:16	4.9		120		1.62		1.44		0.89		45		1.685		1.771
08:18	4.2		120		1.38		1.18		0.85		41		1.105		1.102
08:19	4.7		120		1.54		1.32		0.86		44		1.312		1.38
08:21	4.4		120		1.44		1.21		0.84		41		1.122		1.081
08:23	4.3		120		1.42		1.18		0.83		39		1.112		1.125
08:25	4.6		120		1.53		1.3		0.85		41		1.51		1.64
08:27	4.4		120		1.45		1.19		0.82		40		1.062		1.096
08:29	5.6		120		1.83		1.57		0.86		51		1.623		1.714
08:31	5.1		120		1.69		1.49		0.88		48		1.805		1.8
08:33	4.6		120		1.51		1.37		0.91		45		1.806		1.975
08:35	4.6		120		1.52		1.4		0.92		46		1.685		1.755
08:37	4.4		120		1.44		1.31		0.91		44		1.494		1.526
08:39	4.4		118		1.43		1.29		0.9		43		1.376		1.453
08:41	4.7		118		1.54		1.37		0.89		46		1.466		1.435
08:43	4.3		118		1.42		1.27		0.89		43		1.354		1.465
08:45	3.8		118		1.24		1.08		0.87		34		1.207		1.179
08:47	4.7		118		1.56		1.37		0.88		44		1.582		1.639
08:50	4.7		118		1.56		1.4		0.9		44		1.806		1.921
08:53	4.5		118		1.48		1.37		0.93		42		2.035		2.232
08:55	4.4		117		1.46		1.31		0.89		43		1.489		1.581
08:57	4.2		117		1.37		1.21		0.88		40		1.252		1.238
08:59	5		117		1.63		1.46		0.89		48		1.648		1.712
09:01	4.5		116		1.48		1.33		0.89		45		1.4		1.476
09:02	4.5		116		1.49		1.31		0.88		45		1.26		1.331
09:04	4.8		118		1.57		1.37		0.87		45		1.324		1.267
09:06	4.5		118		1.48		1.33		0.89		45		1.519		1.565
09:08	4.6		118		1.5		1.34		0.89		43		1.533		1.499
09:10	4.3		118		1.41		1.25		0.88		41		1.308		1.463
09:12	4.8		118		1.57		1.37		0.88		43		1.503		1.475
09:15	4.7		120		1.56		1.39		0.89		44		1.685		1.777
09:17	4.5		120		1.48		1.32		0.89		42		1.606		1.714
09:19	4.7		120		1.54		1.39		0.9		44		1.569		1.641
09:22	4.6		120		1.52		1.39		0.91		43		1.84		1.907
09:24	4.3		120		1.42		1.25		0.88		41		1.346		1.374
09:26	4.6		123		1.53		1.36		0.89		44		1.517		1.591
09:28	4.6		123		1.5		1.32		0.88		42		1.331		1.387
09:30	4.9		123		1.61		1.41		0.88		46		1.443		1.504
09:31	4.3		123		1.4		1.22		0.87		39		1.262		1.364
09:34	4.9		125		1.61		1.46		0.91		44		2.052		2.244
09:36	4.7		125		1.56		1.4		0.9		46		1.587		1.694
09:38	4.8		125		1.58		1.4		0.89		46		1.385		1.408
09:40	4.7		125		1.56		1.41		0.91		44		1.657		1.776
09:42	4.8		125		1.57		1.4		0.89		46		1.46		1.485
09:44	4.8		125		1.59		1.44		0.91		48		1.525		1.58
09:46	4.8		125		1.56		1.4		0.9		45		1.409		1.447
09:48	4.9		125		1.62		1.46		0.9		51		1.574		1.647
09:49	4.3		125		1.42		1.26		0.89		45		1.105		1.128
09:51	4.6		125		1.51		1.34		0.89		45		1.143		1.207
09:53	4.4		125		1.46		1.27		0.87		42		1.163		1.199
09:54	4.5		123		1.48		1.3		0.87		43		1.201		1.359
09:56	4.5		123		1.48		1.29		0.87		40		1.26		1.217
09:58	4.7		123		1.55		1.33		0.86		43		1.235		1.326
10:00	4.2		123		1.38		1.15		0.84		38		1.051		0.978
10:01	4.3		123		1.42		1.18		0.83		38		1.093		1.144
10:03	5.6		123		1.84		1.55		0.84		49		1.534		1.639
10:05	5.2		122		1.72		1.46		0.85		48		1.379		1.47
10:07	5.5		122		1.79		1.58		0.88		50		1.865		1.879
10:09	5		122		1.65		1.5		0.9		47		1.813		1.976
10:11	5		122		1.65		1.48		0.9		48		1.665		1.771
10:14	4.9		122		1.61		1.47		0.92		48		1.707		1.798
10:15	4.6		121		1.5		1.37		0.91		47		1.33		1.465
10:17	4.9		121		1.6		1.46		0.91		49		1.418		1.432
10:19	4.9		122		1.61		1.47		0.91		51		1.408		1.486
10:20	4.9		123		1.6		1.46		0.91		48		1.419		1.412
10:22	4.9		123		1.6		1.44		0.9		50		1.383		1.436
10:24	4.7		123		1.55		1.4		0.91		46		1.377		1.388
10:26	5		123		1.64		1.49		0.91		49		1.483		1.59
10:28	4.8		123		1.57		1.42		0.9		47		1.49		1.521
10:29	5.1		125		1.67		1.51		0.9		49		1.498		1.605
10:31	4.6		125		1.52		1.36		0.89		44		1.326		1.289
10:33	5.7		125		1.88		1.7		0.9		56		1.61		1.771
10:35	5.2		125		1.7		1.53		0.9		53		1.75		1.718
10:37	5		125		1.63		1.53		0.94		49		1.806		1.906
10:39	4.5		125		1.49		1.38		0.92		44		1.535		1.541
10:41	5.1		125		1.66		1.53		0.92		50		1.593		1.704
10:43	4.9		125		1.61		1.47		0.91		49		1.457		1.489
10:45	4.8		125		1.58		1.46		0.93		48		1.631		1.729
10:47	4.9		125		1.61		1.46		0.91		49		1.387		1.466
10:48	4.9		125		1.62		1.49		0.92		52		1.45		1.54
10:50	5		125		1.64		1.53		0.93		50		1.612		1.609
10:52	5		125		1.64		1.54		0.94		51		1.619		1.73
10:54	4.9		125		1.6		1.49		0.93		49		1.44		1.543
10:57	4.6		126		1.5		1.44		0.96		43		1.949		2.049
10:58	4.6		126		1.5		1.37		0.92		45		1.283		1.389
11:00	5		127		1.64		1.48		0.9		49		1.43		1.448
11:02	4.9		127		1.6		1.44		0.9		47		1.399		1.429
11:04	5.2		127		1.7		1.55		0.92		50		1.502		1.663
11:06	5.1		126		1.66		1.5		0.9		48		1.416		1.393
11:08	4.7		126		1.53		1.4		0.92		44		1.533		1.702
11:10	5.4		127		1.78		1.66		0.93		54		1.713		1.814
11:12	5.2		127		1.7		1.59		0.93		52		1.693		1.723
11:14	4.8		127		1.57		1.5		0.95		49		1.894		1.987
11:16	5		129		1.64		1.56		0.95		51		1.779		1.92
11:18	5.1		129		1.66		1.54		0.93		52		1.474		1.488
11:20	4.8		130		1.58		1.46		0.92		48		1.454		1.499
11:21	4.9		130		1.6		1.47		0.92		50		1.251		1.251
11:23	5.3		130		1.74		1.6		0.92		53		1.451		1.493
11:25	5.5		133		1.82		1.68		0.92		55		1.691		1.687
11:26	5.1		133		1.69		1.58		0.94		51		1.597		1.708
11:28	5.1		133		1.68		1.6		0.95		50		1.725		1.896
11:30	5.1		133		1.69		1.6		0.94		51		1.659		1.731
11:33	5.1		133		1.67		1.62		0.97		51		1.942		2.106
11:35	5		133		1.65		1.59		0.96		50		1.849		1.947
11:36	5.4		133		1.76		1.66		0.94		56		1.455		1.568
11:38	5.3		133		1.73		1.65		0.95		53		1.717		1.727
11:41	4.9		133		1.63		1.58		0.97		49		1.914		2.09
11:43	5.2		133		1.72		1.66		0.96		54		1.713		1.825
11:44	5		133		1.64		1.56		0.95		50		1.513		1.542
11:46	5.1		133		1.69		1.59		0.94		54		1.414		1.543
11:48	5.1		133		1.69		1.6		0.95		54		1.321		1.446
11:49	5.4		133		1.76		1.68		0.95		57		1.379		1.445
11:51	4.8		131		1.58		1.47		0.93		46		1.305		1.26
11:52	5		131		1.64		1.54		0.93		51		1.258		1.441
11:54	5.6		131		1.82		1.71		0.94		56		1.311		1.386
11:55	5.8		133		1.92		1.82		0.95		59		1.714		1.695
11:57	5.6		133		1.83		1.75		0.96		60		1.583		1.748
11:59	5.5		133		1.8		1.75		0.98		59		1.887		1.857
12:01	5.1		131		1.66		1.67		1		56		1.889		2.101
12:02	5.2		131		1.72		1.71		0.99		59		1.596		1.773
12:04	5.2		134		1.7		1.69		1		58		1.625		1.657
12:06	5.2		134		1.72		1.7		0.99		58		1.486		1.576
12:07	5		134		1.66		1.64		0.99		54		1.527		1.514
12:09	4.9		134		1.6		1.56		0.97		53		1.295		1.478
12:10	5.3		136		1.74		1.72		0.99		58		1.435		1.535
12:12	5		136		1.63		1.6		0.98		52		1.328		1.383
12:13	5.2		136		1.71		1.66		0.97		56		1.383		1.443
12:15	5.3		137		1.74		1.68		0.96		55		1.449		1.54
12:16	5		137		1.65		1.59		0.96		56		1.308		1.383
12:18	5.6		136		1.83		1.79		0.98		59		1.65		1.8
12:20	5.2		133		1.72		1.67		0.97		56		1.542		1.549
12:21	4.7		133		1.53		1.49		0.97		50		1.348		1.505
12:23	5.5		133		1.82		1.78		0.98		59		1.545		1.578
12:25	5.6		134		1.83		1.8		0.98		58		1.707		1.841
12:27	5.2		134		1.69		1.72		1.01		53		2.076		2.247
12:29	5.4		134		1.76		1.76		0.99		58		1.641		1.79
12:30	5.1		134		1.67		1.66		0.99		56		1.516		1.661
12:32	5.5		134		1.81		1.8		0.99		59		1.707		1.684
12:34	5.4		134		1.76		1.76		1		57		1.76		1.857
12:36	5.5		136		1.81		1.81		1		59		1.745		1.937
12:37	5.9		136		1.92		1.91		0.99		63		1.694		1.704
12:39	5.6		136		1.84		1.83		1		61		1.741		1.797
12:41	5.3		136		1.76		1.77		1.01		60		1.699		1.819
12:42	5.6		136		1.83		1.84		1		60		1.732		1.817
12:45	5.4		139		1.77		1.82		1.03		58		2.124		2.186
12:47	5.3		139		1.73		1.8		1.04		57		2.248		2.377
12:49	5.3		139		1.74		1.82		1.04		59		2.159		2.406
12:51	5.4		139		1.78		1.87		1.05		60		1.992		2.228
12:53	5.4		139		1.78		1.87		1.05		60		1.97		2.089
12:55	5.4		141		1.77		1.87		1.06		62		1.944		2.141
12:57	5.8		141		1.91		1.99		1.05		67		1.713		1.842
12:58	5.4		141		1.79		1.89		1.06		61		1.895		1.932
13:00	5.4		142		1.78		1.85		1.04		61		1.646		1.808
13:02	5.8		142		1.91		2		1.05		67		1.667		1.693
13:03	5.7		142		1.87		1.94		1.04		63		1.646		1.751
13:05	5.8		141		1.92		2.02		1.05		64		1.84		1.912
13:06	5.8		141		1.9		2		1.05		66		1.869		1.993
13:09	5.2		141		1.72		1.83		1.07		57		2.063		1.889
13:10	4.9		144		1.61		1.65		1.02		55		1.248		1.688
13:12	6		144		1.97		2.04		1.04		66		1.678		1.755
13:14	5.7		144		1.87		1.95		1.04		60		1.972		2.054
13:16	5.6		146		1.85		1.94		1.05		60		2.1		2.184
13:18	5.6		146		1.85		1.96		1.06		62		2.145		2.31
13:19	5.6		142		1.84		1.94		1.06		65		1.815		2.094
13:21	6		142		1.96		2.09		1.07		71		1.831		1.971
13:22	6.2		142		2.04		2.19		1.08		74		1.826		1.929
13:24	5.4		142		1.76		1.9		1.08		64		1.503		1.621
13:25	5.9		144		1.95		2.13		1.09		73		1.815		1.866
13:27	5.8		144		1.91		2.06		1.08		67		1.749		1.837
13:28	5.6		144		1.84		1.99		1.08		66		1.54		1.645
13:30	5.8		146		1.91		2.03		1.06		68		1.549		1.617
13:31	5.5		146		1.8		1.94		1.07		62		1.523		1.727
13:33	5.7		146		1.86		1.97		1.06		63		1.725		1.584
13:34	5.4		146		1.78		1.86		1.04		60		1.557		1.73
13:36	6.1		146		2.01		2.1		1.05		64		2.006		1.881
13:38	6.1		146		1.99		2.12		1.06		67		1.996		2.282
13:40	6		144		1.97		2.09		1.06		66		1.812		1.943
13:42	5.8		144		1.92		2.04		1.07		62		2.107		2.139
13:44	5.7		144		1.88		2.02		1.08		62		2.035		2.321
13:45	6		144		1.98		2.11		1.06		67		1.791		1.994
13:47	6.2		144		2.04		2.18		1.07		70		1.727		1.82
13:48	5.9		144		1.93		2.09		1.08		66		1.928		1.983
13:51	5.6		144		1.85		1.99		1.07		62		2.144		2.116
13:52	5.8		144		1.91		2.08		1.09		66		2.011		2.413
13:54	5.9		146		1.93		2.09		1.08		65		1.981		2.068
13:56	5.6		146		1.85		2.01		1.09		62		2.187		2.193
13:58	5.7		146		1.89		2.05		1.09		62		2.167		2.398
14:00	5.8		144		1.9		2.09		1.1		64		2.158		2.353
14:02	5.7		144		1.86		2.03		1.09		61		2.047		2.165
14:04	6		144		1.98		2.17		1.1		70		1.973		2.231
14:06	6.2		148		2.03		2.21		1.09		70		1.976		1.976
14:08	5.8		148		1.91		2.12		1.11		68		1.996		2.209
14:09	6		148		1.98		2.17		1.1		69		1.933		1.984
14:11	6.1		148		1.99		2.2		1.11		71		1.855		2.033
14:12	6.1		148		2.01		2.21		1.1		69		1.922		2.023
14:14	6		148		1.97		2.18		1.11		69		2.128		2.173
14:16	6.3		148		2.05		2.26		1.1		73		1.945		2.129
14:18	6.1		148		2		2.22		1.11		72		1.947		2.107
14:20	5.4		150		1.79		2		1.12		59		1.967		2.155
14:21	6.3		150		2.08		2.31		1.11		74		1.631		1.748
14:22	6.1		150		1.99		2.22		1.12		69		1.825		1.903
14:24	5.7		150		1.88		2.06		1.1		64		1.628		1.593
14:24	Recovery
14:25	5.9		150		1.95		2.12		1.09		67		1.607		1.753
14:27	6		150		1.97		2.15		1.1		67		1.667		1.856
14:29	6.3		150		2.07		2.28		1.1		70		1.912		2.053
14:30	6.2		148		2.04		2.22		1.09		69		1.817		1.94
14:32	6		148		1.98		2.18		1.1		69		1.733		1.876
14:33	6.1		148		1.99		2.19		1.1		71		1.905		2.004
14:35	6.1		151		2.02		2.27		1.12		74		2.025		2.192
14:36	6.2		151		2.02		2.3		1.14		74		1.946		2.127
14:38	5.9		151		1.93		2.18		1.13		69		2.036		2.057
14:40	5.7		155		1.87		2.15		1.15		67		2.177		2.29
14:42	5.5		155		1.82		2.09		1.15		65		1.94		2.1
14:44	5.8		155		1.91		2.16		1.13		68		1.809		1.934
14:45	5.8		141		1.89		2.14		1.13		66		1.858		1.952
14:47	5.6		141		1.83		2.1		1.15		63		2.113		2.093
14:50	5.2		146		1.72		2		1.16		60		2.213		2.317
14:52	5.3		146		1.76		2.04		1.16		59		2.357		2.474
14:54	5.5		146		1.82		2.1		1.15		61		2.057		2.333
14:56	5.4		141		1.77		2.03		1.15		59		2.157		2.155
14:58	5.4		141		1.76		2.04		1.16		59		2.228		2.399
15:01	5.3		139		1.73		1.98		1.15		56		2.292		2.329
15:03	5.5		139		1.82		2.1		1.16		60		2.365		2.538
15:05	5.4		136		1.78		2.06		1.16		62		2.017		2.311
15:07	5		136		1.64		1.93		1.17		57		2.012		2.055
15:09	5.3		136		1.74		2.06		1.19		63		1.906		2.335
15:11	5.3		134		1.75		2.03		1.16		62		1.616		1.654
15:12	5.7		134		1.89		2.22		1.18		68		1.971		2.097
15:14	5.4		134		1.79		2.14		1.2		67		1.983		2.143
15:16	5.2		134		1.72		2.07		1.21		62		2.162		2.133
15:19	4.8		134		1.56		1.93		1.23		55		2.332		2.429
15:21	5		133		1.66		2.03		1.22		58		2.376		2.652
15:24	4.3		133		1.41		1.75		1.24		50		2.145		2.486
15:26	5.1		130		1.68		2.03		1.21		57		2.257		2.173
15:29	4.5		130		1.49		1.81		1.22		53		2.172		2.472
15:31	4.6		129		1.52		1.86		1.22		57		2.092		2.378
15:33	4.8		129		1.58		1.93		1.22		57		2.131		2.185
15:35	4.7		125		1.55		1.9		1.23		56		2.108		2.239
15:38	4.9		125		1.6		1.97		1.23		61		2.191		2.285
15:40	4.6		123		1.52		1.93		1.27		60		2.265		2.521
15:42	4.6		123		1.5		1.9		1.27		60		2.09		2.264
15:44	4.7		123		1.53		1.95		1.27		64		2.108		2.207
15:46	4.5		126		1.48		1.91		1.29		63		2.131		2.19
15:48	4.4		126		1.44		1.86		1.3		61		1.87		1.969
15:50	4.5		125		1.47		1.91		1.3		62		1.956		2.107
15:52	4.1		125		1.36		1.76		1.3		57		1.989		2.086
15:53	4.5		125		1.46		1.88		1.28		62		1.778		1.898
15:55	4.4		125		1.44		1.86		1.28		60		1.855		1.898
15:57	4.3		125		1.41		1.83		1.29		62		1.92		2.003
16:00	3.1		121		1.01		1.33		1.31		44		1.923		2.076
16:02	4.8		121		1.59		2		1.25		61		1.892		1.816
16:04	4.4		121		1.44		1.84		1.28		57		1.962		2.16
16:06	4.4		118		1.46		1.89		1.29		62		1.966		2.031
16:08	4.3		118		1.4		1.82		1.3		60		2.022		2.152
16:09	4.2		115		1.37		1.79		1.31		61		1.826		1.939
16:11	3.9		115		1.28		1.71		1.33		59		1.898		1.991
16:13	3.9		115		1.28		1.69		1.32		57		1.786		1.804
16:15	4		115		1.3		1.73		1.33		59		1.844		1.926
16:17	4		115		1.33		1.78		1.34		61		1.929		1.95
16:19	3.8		115		1.26		1.71		1.35		58		1.999		2.06
16:21	3.7		113		1.22		1.67		1.37		59		1.924		2.107
16:23	3.4		113		1.12		1.51		1.34		52		1.611		1.66
16:25	2.9		111		0.95		1.28		1.34		42		1.668		1.621
16:41			107
16:57			105
17:13			105
17:28			104
17:44			103
18:00			99
18:15			96
18:31			93
	4.5825	0.845092	119.078	353.607	1.50584	0.0912608	1.44316	0.184675	0.943932	0.0203897	47.1705	162.438	1.49718	0.148815	1.56393	0.186709
	METS						HR						VO2						VCO2						RER						VE						Vtex						Vtin						LABEL
	Rest		Test		Recovery		Rest		Test		Recovery		Rest		Test		Recovery		Rest		Test		Recovery		Rest		Test		Recovery		Rest		Test		Recovery		Rest		Test		Recovery		Rest		Test		Recovery
	MEDIA	VAR	MEDIA	VAR	MEDIA	VAR	MEDIA	VAR	MEDIA	VAR	MEDIA	VAR	MEDIA	VAR	MEDIA	VAR	MEDIA	VAR	MEDIA	VAR	MEDIA	VAR	MEDIA	VAR	MEDIA	VAR	MEDIA	VAR	MEDIA	VAR	MEDIA	VAR	MEDIA	VAR	MEDIA	VAR	MEDIA	VAR	MEDIA	VAR	MEDIA	VAR	MEDIA	VAR	MEDIA	VAR	MEDIA	VAR	BIN
	1.13333	0.215294	4.52823	0.857111	4.91967	0.649273	65.3889	4.48693	117.306	353.43	128.812	246.155	0.368889	0.0232458	1.48792	0.0924462	1.61721	0.0706738	0.357222	0.0235507	1.36124	0.159027	1.95213	0.0435737	0.957778	0.00627712	0.899631	0.00847605	1.21918	0.00636432	14.8333	23.4412	44.9446	147.042	61	36.4	0.685056	0.135485	1.41652	0.11996	1.99831	0.0366646	0.682333	0.12535	1.47465	0.15101	2.11861	0.0515879	0
	1.13333	0.215294	4.52823	0.857111	4.91967	0.649273	65.3889	4.48693	117.306	353.43	128.812	246.155	0.368889	0.0232458	1.48792	0.0924462	1.61721	0.0706738	0.357222	0.0235507	1.36124	0.159027	1.95213	0.0435737	0.957778	0.00627712	0.899631	0.00847605	1.21918	0.00636432	14.8333	23.4412	44.9446	147.042	61	36.4	0.685056	0.135485	1.41652	0.11996	1.99831	0.0366646	0.682333	0.12535	1.47465	0.15101	2.11861	0.0515879	0
[truncated: 1 more columns]
