# Supplementary material for: On the development of diagnostic support algorithms based on CPET biosignals data via machine learning and wavelets
Source: PeerJ journal article supplement (doi:10.7717/peerj-cs.2474), 2025-01-30
Supplement: raw_data.zip [file Subject13_BxB.xlsx]

## Sheet: Demographics
Gender:	Female
Age:	68
Height (cm):	164
Weight (kg):	141.6
BMI:	53
Condition:	HFrEf

## Sheet: Subject13_BxB
Time	METS		HR		V'O2		V'CO2		RER		V'E		VTex		VTin
min			1/min		L/min		L/min				L/min		L		L
00:00	Rest
00:03	1.2				0.6		0.48		0.8		16		0.677
00:04	0.6		77		0.32		0.25		0.78		14		0.414		0.743
00:07	1.7		77		0.82		0.67		0.81		23		0.98		0.65
00:10	1.3		77		0.64		0.53		0.83		18		0.856		0.943
00:13	1.2		77		0.6		0.51		0.85		18		0.921		0.881
00:16	1.1		77		0.55		0.48		0.86		18		0.83		0.893
00:19	1		77		0.48		0.43		0.88		16		0.772		0.871
00:21	1		78		0.5		0.43		0.87		16		0.699		0.623
00:24	0.2		78		0.12		0.1		0.8		5		0.279		0.372
00:27	0.4		78		0.22		0.17		0.76		8		0.316		0.297
00:30	1.4		79		0.7		0.57		0.8		19		1.039		1.039
00:33	1.2		79		0.59		0.49		0.83		17		0.873		0.895
00:37	1.3		78		0.64		0.56		0.88		20		1.213		1.312
00:40	0.8		78		0.4		0.36		0.9		14		0.69		0.792
00:43	0.5		78		0.25		0.22		0.87		9		0.43		0.575
00:44	0.7		78		0.37		0.3		0.82		11		0.289		0.223
00:47	1.4		78		0.69		0.57		0.82		20		0.783		0.691
00:49	0.8		78		0.4		0.32		0.8		12		0.492		0.556
00:49	Test
00:51	0.5		80		0.26		0.21		0.78		9		0.346		0.45
00:54	1.3		80		0.65		0.52		0.81		18		0.762		0.795
00:56	1.4		80		0.69		0.56		0.81		22		0.63		0.706
00:58	1.5		80		0.72		0.6		0.84		20		0.846		0.864
01:00	2		80		0.98		0.82		0.84		31		1.002		1.078
01:02	1.7		80		0.86		0.74		0.87		27		1.045		1.006
01:04	1.5		81		0.75		0.66		0.88		26		0.818		0.903
01:06	1.5		81		0.74		0.66		0.9		27		0.774		0.889
01:08	1.6		81		0.8		0.73		0.91		27		0.91		0.861
01:10	1.5		82		0.76		0.7		0.92		28		0.897		0.928
01:12	1.5		82		0.72		0.68		0.94		28		0.749		0.867
01:13	1.3		82		0.65		0.6		0.93		26		0.574		0.7
01:15	1.8		83		0.9		0.86		0.96		34		0.954		0.899
01:16	1.8		83		0.9		0.87		0.96		36		0.908		1
01:18	1.6		83		0.81		0.79		0.98		33		0.902		0.803
01:20	1.6		84		0.79		0.78		0.99		30		1.025		1.092
01:21	1.4		85		0.71		0.68		0.95		30		0.77		0.785
01:23	1.5		85		0.73		0.69		0.95		29		0.827		0.802
01:25	1.5		85		0.72		0.68		0.94		29		0.759		0.822
01:26	1.8		85		0.87		0.82		0.94		32		0.828		0.906
01:27	1.3		85		0.67		0.62		0.93		29		0.572		0.676
01:29	1.8		85		0.9		0.82		0.92		29		0.827		0.718
01:31	1.6		88		0.79		0.71		0.89		29		0.739		0.758
01:32	1.8		88		0.88		0.78		0.88		30		0.9		0.91
01:34	1.9		88		0.94		0.82		0.87		32		0.816		0.831
01:36	1.9		88		0.96		0.84		0.88		33		0.959		0.949
01:38	2		88		0.99		0.88		0.89		35		1.14		1.143
01:39	1.8		89		0.9		0.8		0.88		35		0.911		0.941
01:41	2		89		0.97		0.86		0.89		36		1.09		1.082
01:43	1.8		89		0.91		0.8		0.88		33		0.895		0.861
01:45	2		89		1.02		0.91		0.9		34		1.241		1.407
01:47	2		89		0.99		0.89		0.89		35		1.068		1.118
01:48	2.1		89		1.03		0.92		0.89		36		1.001		1.03
01:50	2.1		90		1.02		0.93		0.91		36		1.109		1.151
01:52	2		90		1		0.89		0.89		34		0.963		0.955
01:54	2.1		90		1.02		0.92		0.9		36		0.981		1.05
01:55	1.9		92		0.96		0.85		0.88		34		0.795		0.847
01:57	2.2		92		1.08		0.97		0.9		40		1.021		0.987
01:58	2.2		92		1.08		0.98		0.9		38		1.089		1.122
02:00	2.2		93		1.1		1		0.91		37		1.199		1.211
02:02	1.6		93		0.81		0.72		0.89		27		0.856		0.939
02:04	2.4		93		1.19		1.05		0.89		39		1.201		1.209
02:06	2.3		95		1.12		1		0.89		37		1.069		1.128
02:07	2.1		95		1.03		0.9		0.88		37		0.805		0.843
02:09	2.4		95		1.19		1.09		0.91		40		1.265		1.313
02:11	2.3		96		1.14		1.04		0.91		42		1.115		1.103
02:12	2.4		96		1.17		1.09		0.93		41		1.338		1.269
02:14	2.2		100		1.11		1.06		0.95		40		1.269		1.373
02:16	2.3		100		1.14		1.09		0.96		42		1.238		1.3
02:18	2.3		100		1.13		1.1		0.97		42		1.171		1.252
02:20	2.3		99		1.14		1.13		0.99		42		1.281		1.327
02:22	2.2		99		1.08		1.06		0.98		39		1.244		1.227
02:23	2.2		99		1.11		1.1		0.99		41		1.237		1.283
02:25	2.1		96		1.06		1.03		0.97		38		1.024		1.065
02:27	2.3		96		1.12		1.09		0.97		40		1.065		1.097
02:28	2.4		96		1.19		1.17		0.98		43		1.214		1.288
02:30	2.1		97		1.04		1.02		0.99		36		1.212		1.231
02:32	2		97		1.01		0.97		0.96		34		1.168		1.192
02:34	2.6		97		1.28		1.23		0.96		43		1.138		1.121
02:36	2.4		99		1.2		1.17		0.97		43		1.192		1.263
02:37	2.3		99		1.14		1.13		0.99		41		1.225		1.299
02:39	2.4		99		1.18		1.18		1		45		1.153		1.237
02:41	2.6		99		1.31		1.35		1.03		50		1.364		1.446
02:42	2.4		99		1.21		1.25		1.03		47		1.239		1.249
02:44	2.2		99		1.1		1.14		1.04		42		1.263		1.306
02:46	2.4		100		1.2		1.24		1.03		47		1.167		1.21
02:47	2.5		100		1.23		1.3		1.05		48		1.356		1.335
02:49	2.5		100		1.24		1.33		1.07		49		1.382		1.474
02:51	2.3		101		1.13		1.21		1.07		44		1.195		1.271
02:52	2.5		101		1.23		1.34		1.09		48		1.34		1.408
02:54	2.2		101		1.11		1.2		1.08		45		1.25		1.313
02:56	1.9		106		0.95		1.02		1.07		36		1.171		1.231
02:57	2.7		106		1.34		1.45		1.08		52		1.314		1.416
02:59	2.6		106		1.27		1.38		1.08		49		1.217		1.24
03:00	2.4		104		1.19		1.29		1.09		46		1.228		1.292
03:02	2.8		104		1.37		1.51		1.1		55		1.279		1.3
03:03	2.7		104		1.31		1.47		1.12		56		1.368		1.383
03:05	2.4		103		1.17		1.3		1.11		48		1.166		1.172
03:06	2.4		104		1.17		1.31		1.13		46		1.336		1.466
03:08	2.4		104		1.19		1.34		1.12		47		1.304		1.329
03:10	2.5		105		1.25		1.42		1.13		50		1.477		1.515
03:12	2.2		105		1.09		1.2		1.1		39		1.242		1.297
03:14	2.4		105		1.19		1.32		1.12		43		1.381		1.524
03:16	2.3		103		1.13		1.24		1.1		41		1.322		1.331
03:18	2.3		103		1.12		1.27		1.13		40		1.643		1.761
	Recovery
03:21	1.9		103		0.96		1.09		1.13		35		1.401		1.557
03:23	2.1		103		1.04		1.18		1.14		39		1.384		1.461
03:24	2.1		102		1.03		1.16		1.13		42		1.184		1.312
03:26	1.5		102		0.75		0.82		1.1		29		0.816		0.944
03:28	2		102		0.97		1.08		1.12		34		1.145		1.256
03:30	2.2		100		1.07		1.18		1.11		39		1.148		1.21
03:32	1.8		100		0.89		0.97		1.09		32		1.066		1.134
03:34	2.2		100		1.08		1.17		1.09		38		1.16		1.237
03:36	2		99		0.98		1.07		1.1		35		1.224		1.282
03:37	2.1		99		1.03		1.15		1.12		40		1.161		1.292
03:40	1.9		97		0.93		1.06		1.14		36		1.244		1.301
03:42	2		97		0.98		1.12		1.15		39		1.292		1.375
03:43	1.9		97		0.96		1.11		1.16		41		1.162		1.313
03:45	1.9		96		0.95		1.1		1.16		39		1.099		1.101
03:47	1.9		96		0.94		1.11		1.18		39		1.171		1.246
03:49	2		96		0.99		1.17		1.18		41		1.347		1.337
03:50	1.8		95		0.88		1.02		1.16		37		1.061		1.158
03:52	1.9		95		0.95		1.11		1.18		37		1.269		1.317
03:54	1.8		94		0.89		1.03		1.15		34		1.068		1.167
03:56	1.8		94		0.9		1.03		1.14		35		1		1.097
03:58	1.8		94		0.91		1.03		1.13		34		1.031		1.079
04:00	1.9		94		0.93		1.03		1.11		34		0.961		1.038
04:02	1.9		94		0.94		1.05		1.11		32		1.2		1.247
04:04	1.8		94		0.88		0.97		1.1		30		1.054		1.144
04:06	2		93		0.97		1.07		1.09		33		1.133		1.206
04:08	1.9		93		0.96		1.06		1.1		33		1.17		1.235
04:10	1.9		92		0.96		1.06		1.11		34		1.12		1.198
04:12	1.9		92		0.96		1.05		1.09		34		1.08		1.127
04:14	1.9		92		0.93		1.02		1.11		33		1.065		1.116
04:16	1.8		91		0.9		0.99		1.11		33		0.974		1.077
04:18	2.1		91		1.02		1.16		1.13		38		1.234		1.274
04:20	2.2		93		1.08		1.27		1.18		45		1.477		1.589
04:21	1.6		93		0.81		0.97		1.19		33		1.023		1.137
04:23	1.8		93		0.91		1.09		1.2		38		0.974		1.046
04:25	1.1		92		0.52		0.62		1.19		24		0.86		1.031
04:27	2.5		92		1.23		1.45		1.17		48		1.267		1.151
04:29	1.6		92		0.8		0.89		1.12		27		1.098		1.056
04:31	2.1		91		1.06		1.18		1.12		36		1.37		1.412
04:35	1.8		102		0.9		1.03		1.15		29		1.974		2.013
04:38	1.6		102		0.79		0.84		1.06		27		0.908		0.965
04:40	0.1		99		0.03		0.03		1.04		6		0.211		0.92
04:43	2.4		99		1.18		1.17		1		29		1.86		1.027
04:46	2.1		86		1.05		1.09		1.05		31		1.472		1.514
04:49	1.9		86		0.92		0.97		1.06		28		1.301		1.34
04:51	1.8		84		0.87		0.92		1.05		28		1.042		1.084
04:54	1.8		84		0.9		0.95		1.06		29		1.109		1.083
04:56	1.7		82		0.86		0.92		1.08		27		1.12		1.125
04:58	1.8		82		0.91		0.99		1.09		30		1.125		1.185
05:01	1.8		81		0.9		1.02		1.13		31		1.262		1.303
05:03	1.7		81		0.84		0.97		1.16		28		1.269		1.307
05:06	1.6		86		0.77		0.89		1.15		26		1.147		1.167
05:09	1.6		86		0.77		0.88		1.14		26		1.132		1.143
05:11	1.6		85		0.81		0.93		1.15		28		1.166		1.214
05:14	1.6		85		0.77		0.89		1.15		26		1.14		1.147
05:17	1.6		80		0.78		0.9		1.15		26		1.155		1.161
05:19	1.5		80		0.76		0.87		1.15		27		1.008		1.127
05:21	1.4		79		0.69		0.8		1.16		25		0.95		1.065
05:25			78
05:40			77
05:56			78
06:12			74
06:27			80
06:43			76
06:59			75
07:15			71
07:30			70
07:46			70
08:02			74
08:18
08:33
08:49
09:05
09:21
	1.95915	0.157752	91.6863	76.4799	0.97	0.0383191	0.999225	0.0537505	1.02782	0.0115179	35.4225	64.4301	1.10542	0.056434	1.15268	0.0499932
	METS						HR						VO2						VCO2						RER						VE						Vtex						Vtin						LABEL
	Rest		Test		Recovery		Rest		Test		Recovery		Rest		Test		Recovery		Rest		Test		Recovery		Rest		Test		Recovery		Rest		Test		Recovery		Rest		Test		Recovery		Rest		Test		Recovery
	MEDIA	VAR	MEDIA	VAR	MEDIA	VAR	MEDIA	VAR	MEDIA	VAR	MEDIA	VAR	MEDIA	VAR	MEDIA	VAR	MEDIA	VAR	MEDIA	VAR	MEDIA	VAR	MEDIA	VAR	MEDIA	VAR	MEDIA	VAR	MEDIA	VAR	MEDIA	VAR	MEDIA	VAR	MEDIA	VAR	MEDIA	VAR	MEDIA	VAR	MEDIA	VAR	MEDIA	VAR	MEDIA	VAR	MEDIA	VAR	BIN
	0.988889	0.158693	2.04941	0.170148	1.82456	0.111172	77.7647	0.441176	93.2118	66.4308	89.7794	83.5775	0.493889	0.0354487	1.01529	0.0406395	0.902456	0.0277653	0.413333	0.0247412	0.989882	0.0670083	1.01316	0.0344934	0.831111	0.0015281	0.963294	0.00765807	1.12404	0.00177093	15.2222	22.0654	37.2118	72.0737	32.7544	42.01	0.697389	0.0753326	1.07207	0.0546314	1.15516	0.0559394	0.726824	0.0766415	1.11213	0.0585132	1.21316	0.0318872	0
	0.988889	0.158693	2.04941	0.170148	1.82456	0.111172	77.7647	0.441176	93.2118	66.4308	89.7794	83.5775	0.493889	0.0354487	1.01529	0.0406395	0.902456	0.0277653	0.413333	0.0247412	0.989882	0.0670083	1.01316	0.0344934	0.831111	0.0015281	0.963294	0.00765807	1.12404	0.00177093	15.2222	22.0654	37.2118	72.0737	32.7544	42.01	0.697389	0.0753326	1.07207	0.0546314	1.15516	0.0559394	0.726824	0.0766415	1.11213	0.0585132	1.21316	0.0318872	0
[truncated: 1 more columns]
