# Supplementary material for: On the development of diagnostic support algorithms based on CPET biosignals data via machine learning and wavelets
Source: PeerJ journal article supplement (doi:10.7717/peerj-cs.2474), 2025-01-30
Supplement: raw_data.zip [file Subject14_BxB.xlsx]

## Sheet: Demographics
Gender:	Female
Age:	56
Height (cm):	152
Weight (kg):	86.9
BMI:	38
Condition:	HFrEf

## Sheet: Subject14_BxB
Time	METS		HR		V'O2		V'CO2		RER		V'E		VTex		VTin
min			1/min		L/min		L/min				L/min		L		L
00:00	Rest
00:03	1.2				0.37		0.31		0.83		10		0.461
00:05	1.1		89		0.33		0.27		0.82		10		0.395		0.672
00:07	1.3		89		0.41		0.33		0.81		12		0.433		0.381
00:09	1.5		89		0.47		0.38		0.81		14		0.432		0.399
00:11	1.5		87		0.44		0.36		0.81		14		0.426		0.396
00:12	1.4		87		0.41		0.34		0.82		14		0.379		0.427
00:14	2.1		87		0.63		0.53		0.84		19		0.522		0.367
00:15	1.6		88		0.5		0.42		0.83		18		0.385		0.431
00:17	1.5		88		0.45		0.39		0.85		15		0.486		0.34
00:20	0.9		88		0.27		0.23		0.86		10		0.474		0.411
00:23	0.9		88		0.27		0.22		0.84		10		0.404		0.426
00:25	1.4		88		0.41		0.34		0.83		13		0.446		0.393
00:27	1.3		88		0.39		0.32		0.82		12		0.397		0.365
00:29	1.5		88		0.45		0.37		0.82		14		0.405		0.352
00:30	1.2		88		0.36		0.29		0.82		12		0.368		0.389
00:32	0.8		88		0.24		0.19		0.8		8		0.204		0.182
00:35	1.2		89		0.36		0.29		0.8		10		0.502		0.413
00:35	Test
00:37	1.2		89		0.38		0.3		0.79		11		0.38		0.416
00:39	1.3		89		0.39		0.31		0.79		12		0.377		0.342
00:41	2.1		89		0.63		0.5		0.8		18		0.54		0.421
00:42	2.1		89		0.64		0.51		0.8		18		0.553		0.49
00:44	2.5		89		0.77		0.62		0.81		23		0.519		0.503
00:45	2		99		0.61		0.5		0.83		19		0.405		0.479
00:46	2		99		0.6		0.49		0.83		19		0.407		0.408
00:48	2.4		99		0.74		0.63		0.85		23		0.505		0.51
00:49	2.4		99		0.72		0.63		0.87		23		0.582		0.508
00:51	2		99		0.6		0.52		0.86		21		0.469		0.466
00:53	1.6		99		0.49		0.43		0.88		16		0.631		0.497
00:55	1.3		114		0.39		0.33		0.85		14		0.372		0.476
00:56	2.3		114		0.69		0.59		0.86		21		0.515		0.443
00:58	1.6		114		0.5		0.42		0.84		17		0.418		0.474
00:59	2.3		114		0.69		0.58		0.84		22		0.487		0.425
01:00	2		107		0.6		0.51		0.86		19		0.508		0.46
01:02	1.7		107		0.52		0.44		0.85		18		0.454		0.51
01:03	2.4		107		0.74		0.64		0.86		23		0.527		0.435
01:05	2.1		107		0.64		0.56		0.86		22		0.5		0.498
01:06	2.1		107		0.64		0.56		0.87		20		0.52		0.462
01:08	2		107		0.59		0.52		0.87		21		0.467		0.55
01:09	0.8		107		0.24		0.21		0.85		15		0.238		0.474
01:09	1.2		107		0.36		0.31		0.86		17		0.217		0.3
01:11	1.9		0		0.57		0.48		0.84		17		0.483		0.233
01:12	2.8		129		0.86		0.7		0.81		25		0.528		0.497
01:14	0.2		129		0.06		0.04		0.71		6		0.126		0.378
01:15	1.9		129		0.58		0.45		0.78		17		0.419		0.287
01:16	0.2		129		0.06		0.03		0.61		8		0.154		0.552
01:19	3.1		129		0.95		0.69		0.72		19		0.88		0.502
01:20	3.2		110		0.98		0.71		0.72		25		0.532		0.524
01:22	4.1		110		1.25		0.91		0.73		32		0.738		0.634
01:23	3.7		110		1.11		0.85		0.77		32		0.696		0.726
01:24	3.2		112		0.97		0.78		0.8		30		0.721		0.763
01:26	3.3		112		1.01		0.84		0.82		33		0.711		0.713
01:27	2.8		112		0.85		0.74		0.87		30		0.692		0.738
01:28	3.2		112		0.96		0.85		0.88		34		0.746		0.7
01:30	2.4		105		0.74		0.66		0.89		26		0.653		0.695
01:31	2.4		105		0.74		0.68		0.91		29		0.618		0.644
01:33	1.9		105		0.59		0.52		0.89		22		0.533		0.545
01:34	2.8		105		0.87		0.75		0.87		29		0.592		0.516
01:35	2.5		107		0.77		0.66		0.86		25		0.59		0.586
01:36	2.5		107		0.76		0.64		0.84		26		0.522		0.552
01:38	2.1		107		0.62		0.5		0.81		19		0.49		0.464
01:39	2.2		102		0.67		0.52		0.78		21		0.429		0.46
01:41	3		102		0.9		0.68		0.76		24		0.526		0.463
01:42	2.6		102		0.8		0.6		0.75		23		0.469		0.493
01:43	3.2		102		0.99		0.74		0.75		27		0.563		0.505
01:44	3.1		104		0.95		0.71		0.75		26		0.527		0.545
01:45	3		104		0.92		0.69		0.75		26		0.502		0.553
01:47	3.7		104		1.12		0.85		0.75		30		0.614		0.52
01:48	3.3		104		1.02		0.78		0.76		29		0.605		0.641
01:49	3.5		104		1.06		0.83		0.78		31		0.608		0.608
01:50	3.5		105		1.05		0.84		0.8		31		0.675		0.649
01:52	3.3		105		1.01		0.82		0.82		33		0.647		0.7
01:53	3.3		105		0.99		0.83		0.84		33		0.642		0.62
01:54	3.5		105		1.05		0.9		0.85		36		0.694		0.668
01:55	2.9		111		0.88		0.77		0.88		33		0.612		0.646
01:56	2.9		111		0.9		0.8		0.89		33		0.634		0.648
01:57	3.2		111		0.97		0.87		0.89		33		0.658		0.599
01:59	2.5		111		0.76		0.67		0.88		27		0.581		0.611
02:00	2.8		120		0.84		0.72		0.87		28		0.565		0.562
02:01	2.8		120		0.86		0.74		0.86		29		0.561		0.555
02:02	3.1		120		0.93		0.8		0.86		31		0.62		0.584
02:03	3		120		0.92		0.78		0.85		30		0.598		0.62
02:05	2.5		126		0.77		0.65		0.84		27		0.504		0.559
02:06	2.9		126		0.88		0.73		0.83		28		0.547		0.485
02:07	3		126		0.92		0.75		0.82		28		0.563		0.534
02:08	2.9		126		0.88		0.72		0.81		27		0.55		0.541
02:09	3		117		0.9		0.73		0.81		27		0.554		0.535
02:11	2.6		117		0.78		0.62		0.79		24		0.489		0.541
02:12	3.7		117		1.11		0.88		0.79		31		0.62		0.545
02:13	3.3		117		0.99		0.78		0.79		29		0.55		0.595
02:14	3.5		120		1.06		0.84		0.8		30		0.624		0.567
02:15	3.8		120		1.17		0.94		0.8		35		0.67		0.665
02:17	3.9		120		1.19		0.97		0.81		35		0.666		0.613
02:18	3.7		120		1.13		0.93		0.82		35		0.665		0.674
02:19	3.3		120		1.01		0.85		0.84		33		0.632		0.635
02:20	3.1		121		0.93		0.79		0.85		32		0.662		0.66
02:21	2.9		121		0.88		0.75		0.85		30		0.625		0.634
02:22	3.3		121		1		0.85		0.84		32		0.628		0.598
02:24	3.3		121		1		0.84		0.84		32		0.598		0.609
02:25	2.6		125		0.8		0.67		0.84		28		0.505		0.566
02:26	3.3		125		1.02		0.85		0.84		31		0.579		0.53
02:27	3.4		125		1.02		0.86		0.84		31		0.593		0.56
02:28	3.3		125		1		0.83		0.83		32		0.577		0.566
02:29	2.9		125		0.87		0.72		0.83		28		0.542		0.555
02:30	3.4		125		1.05		0.85		0.81		30		0.594		0.534
02:31	3.5		125		1.05		0.86		0.82		33		0.589		0.605
02:33	2.9		125		0.87		0.72		0.82		27		0.508		0.59
02:34	3.5		125		1.06		0.87		0.82		31		0.62		0.554
02:35	3.9		133		1.2		0.99		0.83		36		0.693		0.655
02:36	3.6		127		1.09		0.92		0.84		35		0.649		0.656
02:37	3.6		127		1.09		0.93		0.85		35		0.671		0.634
02:38	3.6		127		1.09		0.93		0.85		34		0.664		0.668
02:40	3.4		115		1.03		0.89		0.87		35		0.633		0.653
02:41	3.3		115		1		0.87		0.87		33		0.619		0.598
02:42	3.4		115		1.04		0.91		0.87		33		0.627		0.635
02:43	3.6		115		1.1		0.97		0.88		37		0.692		0.658
02:44	3.3		115		1		0.87		0.87		33		0.64		0.659
02:45	3.7		116		1.11		0.97		0.87		35		0.671		0.656
02:46	3.4		116		1.04		0.91		0.88		34		0.611		0.609
02:47	3.3		116		1.02		0.89		0.87		34		0.587		0.618
02:48	3.6		116		1.09		0.97		0.89		36		0.689		0.614
02:50	3.2		117		0.98		0.86		0.88		32		0.662		0.662
02:51	3.1		117		0.93		0.8		0.86		30		0.602		0.595
02:52	3.6		117		1.08		0.94		0.86		34		0.644		0.63
02:53	3.4		117		1.03		0.89		0.87		34		0.637		0.621
02:54	3.5		126		1.08		0.94		0.87		34		0.633		0.612
02:55	3.5		126		1.08		0.94		0.87		35		0.646		0.655
02:57	3.4		126		1.02		0.88		0.87		33		0.618		0.595
02:58	3.5		126		1.06		0.89		0.85		32		0.651		0.58
02:59	2.4		121		0.74		0.6		0.82		23		0.618		0.551
03:00	2.7		121		0.82		0.66		0.81		26		0.479		0.705
03:02	3.4		121		1.04		0.85		0.81		27		0.591		0.362
03:03	3.9		121		1.2		0.95		0.79		35		0.618		0.694
03:05	3.4		121		1.03		0.82		0.8		27		0.809		0.685
03:06	4.6		121		1.39		1.09		0.79		40		0.713		0.729
03:07	3.9		121		1.2		0.99		0.83		37		0.672		0.734
03:08	4.4		121		1.33		1.14		0.86		43		0.793		0.742
03:09	3.9		121		1.2		1.04		0.87		40		0.749		0.815
03:10	3.5		0		1.08		0.97		0.9		38		0.712		0.76
03:11	3.9		181		1.18		1.09		0.92		42		0.759		0.723
03:12	3.4		181		1.04		0.98		0.94		39		0.748		0.79
03:14	3.7		181		1.12		1.05		0.94		41		0.76		0.744
03:15	3.3		181		1.01		0.95		0.93		35		0.68		0.702
03:16	3.5		181		1.06		0.99		0.93		38		0.655		0.697
03:17	3.4		181		1.03		0.95		0.93		37		0.638		0.659
03:18	3.6		181		1.09		1.01		0.93		37		0.662		0.586
03:19	3.7		181		1.12		1.04		0.93		38		0.683		0.667
03:20	3.6		0		1.09		1.01		0.92		38		0.672		0.686
03:21	3.6		118		1.09		1.01		0.92		37		0.685		0.657
03:22	3.9		118		1.2		1.1		0.92		39		0.698		0.7
03:23	3.8		118		1.16		1.07		0.92		40		0.703		0.716
03:24	3.6		120		1.11		1.03		0.93		39		0.702		0.703
03:25	3.6		120		1.09		1.02		0.94		38		0.715		0.677
03:26	3.7		120		1.12		1.06		0.94		40		0.727		0.754
03:28	3		120		0.9		0.84		0.93		31		0.676		0.702
03:29	3.3		120		1.01		0.92		0.91		35		0.631		0.65
03:30	3.6		122		1.09		1.01		0.92		37		0.652		0.662
03:31	3.7		122		1.13		1.04		0.92		38		0.68		0.65
03:32	3.7		122		1.13		1.04		0.92		38		0.689		0.693
03:33	3.6		122		1.09		1.01		0.92		37		0.65		0.68
03:34	3.6		123		1.11		1.02		0.93		38		0.688		0.665
03:35	3.9		123		1.19		1.11		0.93		41		0.709		0.696
03:36	3.7		123		1.12		1.04		0.93		39		0.724		0.718
03:38	3.5		123		1.08		1.01		0.94		38		0.726		0.694
03:39	3.6		123		1.1		1.03		0.94		38		0.743		0.747
03:40	3.9		131		1.19		1.11		0.93		40		0.676		0.701
03:41	3.8		131		1.15		1.08		0.95		40		0.7		0.661
03:42	3.8		131		1.15		1.1		0.95		40		0.728		0.724
03:43	4.2		131		1.26		1.22		0.96		45		0.746		0.721
03:44	3.6		131		1.08		1.05		0.97		40		0.688		0.736
03:45	3.4		130		1.04		1.02		0.98		39		0.724		0.71
03:46	3.7		130		1.11		1.09		0.98		41		0.758		0.748
03:47	3.3		130		1		0.98		0.98		37		0.714		0.732
03:48	3.7		130		1.12		1.08		0.97		39		0.727		0.73
03:49	3.3		129		1		0.96		0.97		37		0.635		0.703
03:51	3.2		129		0.97		0.94		0.96		36		0.648		0.663
03:52	4.1		129		1.23		1.19		0.96		43		0.75		0.726
03:53	3.5		129		1.05		1.02		0.97		37		0.721		0.792
03:54	3.7		129		1.13		1.08		0.96		39		0.722		0.724
03:55	3.9		142		1.18		1.12		0.96		40		0.715		0.736
03:56	3.8		142		1.14		1.1		0.96		40		0.754		0.74
03:57	4		142		1.21		1.16		0.96		42		0.769		0.796
03:58	3.7		142		1.11		1.08		0.97		41		0.743		0.783
03:59	4.1		136		1.25		1.22		0.98		44		0.799		0.729
04:00	4		136		1.23		1.2		0.98		45		0.809		0.827
04:02	3.7		136		1.11		1.1		0.99		40		0.788		0.775
04:03	3.7		136		1.13		1.11		0.98		41		0.742		0.763
04:04	3.4		136		1.04		1.02		0.98		38		0.717		0.775
04:05	3.8		126		1.15		1.13		0.98		40		0.79		0.783
04:06	3.5		126		1.08		1.05		0.97		38		0.73		0.785
04:07	3.9		126		1.18		1.13		0.96		39		0.754		0.764
04:08	3.8		126		1.17		1.14		0.97		40		0.813		0.833
04:10	3.9		127		1.2		1.16		0.97		43		0.778		0.839
04:11	3.3		127		1.01		0.98		0.97		34		0.752		0.768
04:12	3.5		127		1.07		1.02		0.96		37		0.738		0.794
04:14	3.5		129		1.05		1.02		0.97		32		1.233		1.322
04:16	4		129		1.23		1.13		0.92		39		0.786		0.781
04:17	4.3		129		1.32		1.23		0.94		42		0.814		0.823
04:18	4.1		129		1.26		1.19		0.94		43		0.781		0.833
04:19	3.2		126		0.97		0.92		0.95		33		0.79		0.773
04:21	4		126		1.23		1.17		0.95		39		0.82		0.844
04:22	4.1		126		1.25		1.19		0.95		43		0.768		0.826
04:23	3.9		126		1.18		1.15		0.98		42		0.713		0.747
04:24	4.2		126		1.28		1.26		0.98		45		0.771		0.731
04:25	3.9		130		1.2		1.18		0.98		42		0.749		0.787
04:26	4.4		130		1.35		1.34		0.99		48		0.837		0.797
04:27	4.1		130		1.24		1.23		0.99		44		0.742		0.752
04:28	4.2		130		1.27		1.27		1		46		0.792		0.783
04:29	4.2		130		1.28		1.3		1.01		47		0.797		0.812
04:30	4.1		131		1.25		1.27		1.02		47		0.822		0.865
04:31	3.8		131		1.14		1.17		1.03		43		0.758		0.765
04:32	3.8		131		1.15		1.17		1.02		41		0.78		0.744
04:33	4		131		1.21		1.22		1.01		44		0.784		0.821
04:34	3.7		131		1.12		1.15		1.02		43		0.757		0.804
04:35	3.8		131		1.15		1.18		1.03		43		0.775		0.76
04:36	4.1		131		1.24		1.27		1.02		46		0.766		0.78
04:37	4.2		131		1.27		1.29		1.01		47		0.76		0.783
04:38	3.8		131		1.17		1.2		1.03		46		0.752		0.804
04:39	3.8		139		1.16		1.21		1.04		45		0.787		0.776
04:40	4		139		1.22		1.27		1.04		45		0.821		0.799
04:41	4		139		1.2		1.25		1.04		46		0.801		0.813
04:43	4.1		139		1.24		1.27		1.03		45		0.811		0.78
04:44	4.4		139		1.35		1.39		1.03		50		0.86		0.864
04:45	4.3		136		1.31		1.34		1.03		50		0.796		0.792
04:46	3.6		136		1.08		1.13		1.04		42		0.761		0.81
04:47	3.9		136		1.19		1.22		1.02		43		0.784		0.752
04:48	4.3		136		1.32		1.36		1.03		50		0.831		0.867
04:49	3.5		136		1.07		1.11		1.04		41		0.736		0.786
04:50	3.9		131		1.18		1.22		1.03		44		0.754		0.783
04:51	4.3		131		1.3		1.34		1.03		50		0.794		0.8
04:52	4		131		1.23		1.26		1.03		46		0.741		0.749
04:53	3.8		131		1.16		1.19		1.02		44		0.803		0.818
04:54	4.3		131		1.29		1.33		1.03		49		0.882		0.834
04:55	3.8		130		1.17		1.2		1.03		45		0.799		0.882
04:56	3.5		130		1.05		1.08		1.03		40		0.736		0.799
04:57	4.4		130		1.34		1.35		1.01		47		0.841		0.775
04:59	3.3		130		1		1		1		35		0.966		0.889
05:00	5.2		126		1.59		1.55		0.97		51		0.926		0.927
05:01	4.6		126		1.39		1.39		1		49		0.845		0.879
05:02	4.4		126		1.33		1.35		1.02		50		0.834		0.872
05:03	4.3		126		1.29		1.34		1.04		50		0.852		0.846
05:04	4.4		126		1.33		1.4		1.05		51		0.897		0.869
05:05	4.2		125		1.27		1.36		1.07		51		0.892		0.976
05:06	3.8		125		1.16		1.24		1.07		48		0.794		0.854
05:07	4.4		125		1.33		1.42		1.07		52		0.84		0.784
05:08	4.4		125		1.33		1.41		1.07		53		0.895		0.911
05:09	4.1		125		1.23		1.32		1.07		49		0.855		0.859
05:11	2.5		133		0.76		0.77		1.01		27		0.844		0.873
05:12	5		133		1.53		1.56		1.02		54		0.955		0.971
05:13	4.4		133		1.33		1.4		1.05		53		0.853		0.95
05:14	4		133		1.23		1.29		1.05		48		0.839		0.827
05:15	3.7		131		1.12		1.19		1.07		43		0.758		0.773
05:16	3.8		131		1.15		1.21		1.06		43		0.862		0.838
05:17	4.6		131		1.39		1.43		1.03		49		0.864		0.859
05:18	4.4		131		1.35		1.42		1.05		52		0.86		0.872
05:19	4.3		134		1.3		1.37		1.05		51		0.852		0.85
05:20	4.5		134		1.36		1.45		1.06		54		0.894		0.906
05:21	4.1		134		1.24		1.33		1.07		52		0.843		0.919
05:22	3.9		134		1.18		1.27		1.07		48		0.822		0.837
05:23	4.1		134		1.24		1.34		1.08		49		0.901		0.881
05:25	3.7		134		1.14		1.22		1.07		45		0.902		0.95
05:26	3.7		134		1.13		1.2		1.06		44		0.846		0.89
05:27	3.8		134		1.16		1.21		1.04		43		0.858		0.849
05:28	4.1		134		1.26		1.32		1.04		47		0.847		0.913
05:29	3.7		134		1.14		1.21		1.06		44		0.795		0.856
05:30	4.2		134		1.28		1.34		1.05		47		0.871		0.835
05:31	4.2		134		1.28		1.34		1.05		48		0.858		0.865
05:32	4		134		1.22		1.3		1.06		46		0.832		0.878
05:34	4.2		134		1.29		1.37		1.06		48		0.895		0.88
05:35	4.3		136		1.31		1.42		1.08		52		0.866		0.936
05:36	3.9		136		1.18		1.28		1.09		46		0.884		0.887
05:37	4.1		136		1.25		1.37		1.09		50		0.892		0.917
05:38	4.2		136		1.26		1.39		1.1		50		0.922		0.905
05:39	4.1		136		1.23		1.34		1.09		47		0.897		0.913
05:40	4.3		137		1.31		1.43		1.09		52		0.899		0.899
05:41	3.6		137		1.11		1.21		1.1		44		0.843		0.916
05:42	4.1		137		1.24		1.35		1.09		48		0.887		0.88
05:43	4.1		137		1.25		1.38		1.1		50		0.876		0.9
05:44	4.1		137		1.24		1.36		1.1		48		0.881		0.863
05:46	3.7		137		1.13		1.23		1.09		44		0.86		0.884
05:47	4.1		137		1.24		1.31		1.06		46		0.853		0.91
05:48	4.1		137		1.25		1.34		1.07		48		0.864		0.896
05:49	4		137		1.21		1.31		1.08		46		0.85		0.865
05:50	4.1		137		1.24		1.31		1.06		46		0.834		0.876
05:51	4		137		1.23		1.32		1.08		48		0.873		0.913
05:52	4		137		1.23		1.32		1.07		47		0.851		0.889
05:53	3.9		137		1.18		1.27		1.08		46		0.803		0.859
05:54	4.1		139		1.25		1.33		1.06		47		0.822		0.829
05:55	3.8		139		1.15		1.22		1.07		44		0.821		0.895
05:57	4.1		139		1.26		1.32		1.05		46		0.811		0.829
05:58	4		139		1.2		1.27		1.05		44		0.876		0.853
05:59	4.3		139		1.32		1.38		1.05		47		0.885		0.92
06:00	4.5		139		1.36		1.43		1.05		50		0.881		0.907
06:01	3.9		139		1.18		1.26		1.06		45		0.815		0.917
06:02	4.6		139		1.39		1.49		1.07		52		0.93		0.894
06:03	4.3		139		1.31		1.43		1.09		52		0.925		0.964
06:04	3.7		139		1.14		1.24		1.09		45		0.84		0.943
06:05	4.3		139		1.3		1.44		1.1		51		0.929		0.916
06:06	4.2		139		1.28		1.42		1.1		51		0.951		0.986
06:08	3.8		139		1.16		1.29		1.11		45		0.931		0.989
06:09	4.3		139		1.31		1.42		1.09		51		0.95		0.956
06:10	3.8		141		1.15		1.26		1.09		45		0.887		0.974
06:11	4.2		141		1.27		1.38		1.09		49		0.915		0.957
06:12	4.2		141		1.29		1.4		1.09		50		0.916		0.888
06:13	4		141		1.2		1.3		1.08		47		0.878		0.917
06:14	4.3		141		1.3		1.41		1.08		50		0.912		0.917
06:15	4.2		141		1.28		1.39		1.08		50		0.895		0.92
06:17	3.9		141		1.19		1.3		1.09		47		0.911		0.93
06:18	4.2		141		1.27		1.38		1.09		49		0.93		0.976
06:19	4.1		141		1.24		1.35		1.09		49		0.867		0.937
06:20	4.2		141		1.27		1.39		1.09		50		0.941		0.947
06:21	4.3		141		1.31		1.43		1.09		51		0.922		0.935
06:22	3.8		141		1.16		1.26		1.09		46		0.86		0.967
06:23	4.2		141		1.29		1.4		1.09		49		0.946		0.934
06:25	3.8		142		1.17		1.27		1.08		42		1.007		1.058
06:26	3.9		142		1.2		1.28		1.06		46		0.907		1.018
06:27	4.3		142		1.31		1.41		1.07		49		0.929		0.893
06:28	4		142		1.21		1.3		1.07		46		0.897		0.963
06:29	4.1		142		1.26		1.35		1.07		47		0.934		0.954
06:31	4.2		142		1.28		1.36		1.06		49		0.907		0.945
06:32	4.2		142		1.27		1.35		1.07		47		0.927		0.944
06:33	4.3		142		1.31		1.4		1.07		50		0.899		0.967
06:34	4.2		142		1.27		1.38		1.09		50		0.906		0.939
06:35	4.3		142		1.32		1.45		1.1		52		0.948		0.987
06:36	3.9		142		1.19		1.31		1.1		48		0.885		0.983
06:37	4.1		142		1.26		1.39		1.11		52		0.924		0.905
06:38	3.9		142		1.2		1.32		1.1		49		0.894		0.942
06:39	4.5		142		1.38		1.52		1.1		54		0.962		0.906
06:40	4.2		142		1.28		1.42		1.11		51		0.976		1.013
06:42	4		142		1.23		1.35		1.1		50		0.913		1.009
06:43	4.3		142		1.29		1.44		1.11		53		0.914		0.925
06:44	3.9		142		1.18		1.3		1.1		49		0.876		0.945
06:45	4.1		146		1.26		1.41		1.12		51		0.898		0.897
06:46	4.3		146		1.31		1.45		1.11		53		0.944		0.937
06:47	3.8		146		1.16		1.29		1.11		48		0.882		0.94
06:48	4.3		146		1.29		1.42		1.09		51		0.955		0.941
06:49	4.3		146		1.29		1.41		1.09		51		0.933		0.992
06:50	4		144		1.22		1.31		1.07		47		0.86		0.93
06:51	4.3		144		1.32		1.45		1.1		53		0.967		0.959
06:52	4.3		144		1.32		1.46		1.11		53		0.957		0.997
06:53	4.2		144		1.28		1.41		1.1		52		0.917		0.948
06:55	4.2		142		1.27		1.41		1.11		52		0.921		0.946
06:56	4.3		142		1.31		1.45		1.1		53		0.928		0.952
06:57	4.1		142		1.25		1.39		1.11		51		0.946		1.002
06:58	3.9		142		1.18		1.3		1.1		48		0.893		0.968
06:59	4.3		142		1.31		1.45		1.11		53		0.97		0.987
07:00	3.9		144		1.2		1.33		1.11		50		0.891		0.969
07:01	4.3		144		1.3		1.46		1.12		54		0.932		0.955
07:02	4.1		144		1.25		1.38		1.1		51		0.898		0.928
07:03	4.5		144		1.37		1.52		1.11		55		0.957		0.963
07:04	4.4		146		1.33		1.47		1.11		54		0.967		0.98
07:05	3.7		146		1.13		1.26		1.11		47		0.872		0.973
07:06	4.1		146		1.24		1.38		1.11		49		0.959		0.95
07:08	4.4		146		1.35		1.47		1.09		54		0.932		0.956
07:09	4		146		1.22		1.34		1.1		49		0.906		0.949
07:10	3.9		146		1.2		1.31		1.09		46		0.912		0.959
07:11	4		146		1.23		1.32		1.07		47		0.879		0.912
07:12	4.3		146		1.31		1.4		1.07		49		0.923		0.905
07:13	4.4		146		1.34		1.44		1.07		50		0.982		0.979
07:14	4.2		146		1.26		1.35		1.07		48		0.968		1.019
07:16	4.5		146		1.36		1.45		1.07		53		0.937		0.984
07:17	4.4		146		1.35		1.47		1.09		54		0.935		0.987
07:18	4.2		146		1.27		1.4		1.1		51		0.94		0.966
07:19	4.3		146		1.31		1.45		1.11		52		1.008		1.005
07:21	3.3		148		1		1.09		1.09		34		1.206		1.424
07:22	4.3		148		1.31		1.37		1.05		47		0.856		0.869
07:23	4.7		148		1.44		1.52		1.06		52		0.944		0.898
07:24	4.5		150		1.38		1.46		1.06		52		0.882		0.982
07:25	4.3		150		1.31		1.39		1.06		50		0.883		0.922
07:26	4.6		150		1.4		1.5		1.07		53		0.898		0.904
07:27	4.1		150		1.24		1.32		1.07		46		0.873		0.891
07:28	4.7		150		1.42		1.54		1.09		54		0.98		0.997
07:30	4.6		157		1.4		1.54		1.1		55		1.006		1.018
07:31	4.4		157		1.35		1.51		1.12		57		0.944		1.043
07:32	4.4		157		1.34		1.5		1.11		57		0.944		0.981
07:33	4.3		157		1.32		1.49		1.13		55		0.913		0.954
07:34	4.3		157		1.32		1.49		1.13		56		0.899		0.95
07:35	4.1		150		1.25		1.41		1.13		53		0.887		0.927
07:36	4.6		150		1.4		1.58		1.12		57		0.984		0.951
07:37	4.5		150		1.37		1.56		1.14		58		1.008		1.052
07:38	4.1		150		1.25		1.43		1.14		53		0.987		1.014
07:39	4.1		150		1.25		1.43		1.14		53		0.908		0.983
07:40	4.4		160		1.34		1.53		1.14		57		1.01		0.987
07:41	4.2		160		1.28		1.48		1.15		54		1.022		1.086
07:42	4.2		160		1.27		1.46		1.15		54		0.977		1.02
07:43	4.3		160		1.29		1.49		1.15		55		0.972		1.008
07:44	4.3		160		1.31		1.5		1.15		55		0.983		1.006
07:45	4		160		1.22		1.39		1.15		52		0.915		0.987
07:46	4.3		160		1.32		1.5		1.14		56		0.94		0.96
07:47	4.3		160		1.31		1.49		1.14		55		0.943		0.977
07:48	4.4		160		1.34		1.54		1.15		57		0.964		0.994
07:49	4.4		151		1.35		1.56		1.15		57		0.963		0.987
07:50	4.5		151		1.36		1.56		1.15		57		0.968		0.984
07:51	4.4		151		1.34		1.55		1.15		58		0.955		1.047
07:52	4.3		151		1.32		1.52		1.15		58		0.973		0.979
07:53	4.2		151		1.28		1.48		1.15		55		0.958		0.982
07:54	4.8		151		1.46		1.68		1.15		61		0.986		0.991
07:55	4.5		151		1.36		1.56		1.15		59		0.977		1.053
07:56	4.6		151		1.39		1.61		1.16		60		1.01		0.992
07:57	4.4		151		1.32		1.53		1.15		59		0.958		1.028
07:58	4.2		151		1.27		1.49		1.17		57		0.978		1.028
07:59	4.2		151		1.27		1.5		1.18		56		1.022		1.022
08:00	4.5		151		1.38		1.61		1.17		60		1.016		1.064
08:01	4.2		151		1.29		1.5		1.17		57		0.976		1.019
08:03	3.9		151		1.2		1.4		1.17		51		0.933		1.023
08:04	4.3		151		1.31		1.53		1.17		52		1.083		1.21
08:04	Recovery
08:05	4		151		1.21		1.42		1.18		52		1.162		1.33
08:06	4.7		151		1.43		1.65		1.16		60		1.073		1.105
08:07	4.2		151		1.28		1.48		1.16		54		0.987		1.117
08:08	4.3		151		1.3		1.5		1.15		56		0.993		1.028
08:09	4.3		151		1.3		1.5		1.16		55		1.04		1.081
08:11	4.2		151		1.26		1.44		1.14		53		1.026		1.131
08:12	4.1		151		1.25		1.42		1.14		53		0.965		1.058
08:13	4.4		151		1.33		1.53		1.15		57		1.006		1.056
08:14	4.2		151		1.28		1.47		1.16		53		0.933		1.006
08:15	4		151		1.23		1.39		1.13		51		0.912		0.982
08:16	4.3		151		1.3		1.46		1.12		50		0.917		0.947
08:17	4.1		151		1.26		1.42		1.13		51		0.947		1.025
08:18	4.3		151		1.3		1.43		1.11		50		0.961		1.034
08:20	4.5		151		1.37		1.51		1.1		51		1.054		1.123
08:21	4.3		151		1.3		1.44		1.11		51		0.945		1.055
08:22	4.4		151		1.34		1.49		1.11		53		0.988		1.032
08:23	4		151		1.22		1.35		1.11		49		0.941		1.028
08:24	4		151		1.22		1.35		1.11		48		0.898		0.983
08:25	4.2		151		1.27		1.42		1.12		51		0.914		0.968
08:26	4.3		151		1.29		1.44		1.11		51		0.945		0.996
08:27	4.3		151		1.3		1.44		1.11		51		0.955		0.997
08:28	4.2		151		1.26		1.4		1.11		50		0.941		1.034
08:30	4.1		150		1.24		1.36		1.1		49		0.933		1.004
08:31	4		150		1.23		1.36		1.1		48		0.902		1.015
08:32	4.1		150		1.23		1.36		1.1		48		0.929		0.98
08:33	4.2		150		1.29		1.42		1.1		49		0.974		1.003
08:34	4		150		1.22		1.33		1.09		47		0.926		1.003
08:35	4.2		150		1.29		1.41		1.09		49		0.965		0.989
08:37	3.9		150		1.2		1.31		1.09		47		0.907		1.013
08:38	4.4		150		1.35		1.45		1.08		51		0.969		0.969
08:39	4.3		150		1.3		1.41		1.09		49		0.932		0.996
08:40	4.2		150		1.27		1.38		1.08		48		0.896		0.972
08:41	4.3		150		1.31		1.43		1.09		51		0.901		0.95
08:42	4.1		150		1.24		1.35		1.09		49		0.929		0.978
08:43	4		150		1.21		1.31		1.09		47		0.92		0.988
08:45	4.1		148		1.24		1.34		1.08		48		0.929		0.97
08:46	4.2		148		1.28		1.36		1.07		47		0.963		0.967
08:47	4.3		148		1.31		1.4		1.07		47		0.993		1.052
08:48	4.3		148		1.32		1.42		1.08		50		0.969		1.057
08:49	4.3		148		1.29		1.4		1.08		50		0.963		1.049
08:51	4.2		148		1.28		1.4		1.1		51		0.948		1.026
08:52	4.3		148		1.29		1.44		1.11		53		0.96		1.016
08:53	4.1		148		1.25		1.4		1.12		51		0.975		1.031
08:54	3.9		148		1.18		1.32		1.12		49		0.901		0.998
08:55	4.1		148		1.25		1.4		1.13		52		0.918		0.989
08:56	4		148		1.23		1.39		1.14		51		0.926		1.004
08:57	4		148		1.21		1.39		1.14		51		0.906		0.986
08:58	3.9		148		1.19		1.37		1.15		52		0.933		1.009
08:59	3.9		148		1.19		1.35		1.14		48		0.93		1.017
09:00	4.1		148		1.25		1.43		1.14		53		0.988		1.048
09:02	4.1		148		1.26		1.45		1.15		54		1.004		1.039
09:03	3.8		148		1.16		1.34		1.16		50		1.007		1.079
09:04	3.9		148		1.17		1.34		1.15		52		0.972		1.056
09:05	3.8		146		1.16		1.34		1.15		50		0.937		1.013
09:06	4.1		146		1.26		1.49		1.18		58		0.968		1.001
09:07	4.3		146		1.31		1.53		1.17		60		1.007		1.046
09:08	4		146		1.21		1.44		1.19		57		1.015		1.076
09:09	3.8		146		1.17		1.4		1.2		56		0.924		0.968
09:10	3.9		146		1.17		1.39		1.19		54		0.916		0.922
09:13	1.6		146		0.47		0.52		1.11		20		0.889		0.9
09:14	3.7		146		1.14		1.12		0.99		36		0.74		0.837
09:16	3.5		146		1.06		1.04		0.98		34		0.872		0.808
09:17	5		146		1.52		1.51		1		44		1.147		1.228
09:18	4.6		146		1.41		1.44		1.02		51		0.875		0.993
09:19	4.8		144		1.46		1.54		1.05		57		0.976		0.99
09:20	4.6		144		1.39		1.51		1.09		57		0.931		1.029
09:21	4.3		144		1.3		1.45		1.11		56		0.974		1.047
09:22	4.1		144		1.25		1.42		1.14		54		1.016		1.034
09:24	3.9		144		1.19		1.37		1.15		53		1.06		1.087
09:25	3.8		144		1.16		1.34		1.15		54		0.934		1.046
09:26	4.1		144		1.23		1.45		1.18		57		1.001		0.974
09:28	2.2		144		0.68		0.75		1.11		26		1.062		1.035
09:29	5		144		1.51		1.65		1.1		59		0.971		1.033
09:30	4.5		142		1.38		1.55		1.13		57		0.979		0.989
09:31	3.9		142		1.2		1.41		1.17		54		0.978		1.087
09:32	3.7		142		1.12		1.33		1.19		52		0.889		0.967
09:33	4		142		1.21		1.43		1.19		55		0.947		0.956
09:35	3		142		0.93		1.1		1.19		41		1.02		0.951
09:36	3.7		142		1.11		1.25		1.13		46		0.889		0.966
09:37	4		142		1.23		1.41		1.14		51		0.97		0.926
09:38	3.6		142		1.09		1.25		1.15		47		0.952		0.981
09:39	3.8		141		1.16		1.33		1.15		49		0.986		0.966
09:41	3.4		141		1.03		1.18		1.15		45		0.922		0.97
09:42	3.6		141		1.09		1.25		1.15		47		0.919		0.947
09:43	3.7		141		1.11		1.28		1.15		47		0.955		0.944
09:44	3.5		141		1.06		1.21		1.14		44		0.939		0.904
09:46	3		141		0.92		1.05		1.14		40		0.885		0.923
09:47	3.4		141		1.02		1.15		1.12		42		0.899		0.884
09:48	3.5		141		1.05		1.17		1.12		43		0.88		0.903
09:49	3		139		0.91		1.01		1.11		39		0.722		0.867
09:50	3.5		139		1.06		1.18		1.11		42		0.82		0.708
09:52	3.4		139		1.02		1.12		1.1		41		0.846		0.863
09:53	3.4		139		1.04		1.14		1.1		41		0.841		0.837
09:54	3.6		139		1.08		1.18		1.1		43		0.878		0.86
09:55	3.4		139		1.02		1.13		1.1		42		0.822		0.843
09:56	3.5		139		1.08		1.18		1.1		45		0.847		0.843
09:58	3.5		139		1.07		1.2		1.12		46		0.893		0.86
09:59	3.8		139		1.15		1.28		1.12		47		0.931		0.879
10:00	3.2		137		0.98		1.11		1.13		43		0.886		0.954
10:01	2.9		137		0.89		1		1.12		38		0.821		0.838
10:03	3		137		0.92		1.01		1.1		37		0.793		0.795
10:04	3.1		137		0.95		1.03		1.08		37		0.827		0.829
10:05	3.3		136		1.01		1.08		1.07		38		0.84		0.815
10:06	2.9		136		0.87		0.93		1.06		35		0.71		0.798
10:08	3.1		136		0.95		1.01		1.06		36		0.721		0.676
10:10	2.8		134		0.86		0.89		1.03		30		0.926		0.806
10:11	3.5		134		1.05		1.05		1		36		0.814		0.91
10:13	3.1		134		0.94		0.92		0.98		31		0.904		0.803
	3.72641	0.508453	133.728	354.041	1.13323	0.0470878	1.16101	0.0925578	1.00984	0.0145765	42.5161	114.299	0.803798	0.0275247	0.823958	0.0339881
	METS						HR						VO2						VCO2						RER						VE						Vtex						Vtin						LABEL
	Rest		Test		Recovery		Rest		Test		Recovery		Rest		Test		Recovery		Rest		Test		Recovery		Rest		Test		Recovery		Rest		Test		Recovery		Rest		Test		Recovery		Rest		Test		Recovery
	MEDIA	VAR	MEDIA	VAR	MEDIA	VAR	MEDIA	VAR	MEDIA	VAR	MEDIA	VAR	MEDIA	VAR	MEDIA	VAR	MEDIA	VAR	MEDIA	VAR	MEDIA	VAR	MEDIA	VAR	MEDIA	VAR	MEDIA	VAR	MEDIA	VAR	MEDIA	VAR	MEDIA	VAR	MEDIA	VAR	MEDIA	VAR	MEDIA	VAR	MEDIA	VAR	MEDIA	VAR	MEDIA	VAR	MEDIA	VAR	BIN
	1.31765	0.0965441	3.68119	0.5621	3.88889	0.285109	88.0625	0.4625	130.459	396.761	145.472	24.8684	0.397647	0.00894412	1.11969	0.0521198	1.18185	0.0262769	0.328235	0.00661544	1.1175	0.0999986	1.31731	0.0349862	0.824118	0.000275735	0.980464	0.0141166	1.11537	0.0020064	12.6471	8.74265	40.9716	120.772	48.0648	52.2294	0.418765	0.00506132	0.767647	0.027623	0.933676	0.0056616	0.3965	0.00884893	0.781441	0.0325535	0.976704	0.00939008	0
	1.31765	0.0965441	3.68119	0.5621	3.88889	0.285109	88.0625	0.4625	130.459	396.761	145.472	24.8684	0.397647	0.00894412	1.11969	0.0521198	1.18185	0.0262769	0.328235	0.00661544	1.1175	0.0999986	1.31731	0.0349862	0.824118	0.000275735	0.980464	0.0141166	1.11537	0.0020064	12.6471	8.74265	40.9716	120.772	48.0648	52.2294	0.418765	0.00506132	0.767647	0.027623	0.933676	0.0056616	0.3965	0.00884893	0.781441	0.0325535	0.976704	0.00939008	0
[truncated: 1 more columns]
