# Supplementary material for: On the development of diagnostic support algorithms based on CPET biosignals data via machine learning and wavelets
Source: PeerJ journal article supplement (doi:10.7717/peerj-cs.2474), 2025-01-30
Supplement: raw_data.zip [file Subject15_BxB.xlsx]

## Sheet: Demographics
Gender:	Male
Age:	76
Height (cm):	181
Weight (kg):	108.8
BMI:	33
Condition:	HFrEf

## Sheet: Subject15_BxB
Time	METS		HR		V'O2		V'CO2		RER		V'E		VTex		VTin
min			1/min		L/min		L/min				L/min		L		L
00:00	Rest
00:02	3				1.14		1.03		0.91		36		1.149
00:05	1.7		77		0.63		0.59		0.94		21		1.06		0.973
00:08	1.7		77		0.66		0.63		0.96		23		1.161		1.142
00:11	1.7		77		0.63		0.62		0.99		23		1.073		1.051
00:14	1.5		77		0.57		0.55		0.98		20		0.968		0.854
00:17	1.4		75		0.52		0.49		0.96		18		0.801		0.797
00:20	1.5		75		0.57		0.55		0.96		19		0.948		0.928
00:22	0.7		75		0.28		0.25		0.9		10		0.377		0.443
00:24	1.4		75		0.54		0.48		0.89		19		0.611		0.711
00:24	Test
00:27	1.4		75		0.52		0.47		0.89		16		0.793		0.63
00:30	1.3		75		0.51		0.45		0.88		15		0.793		0.703
00:32	1.1		75		0.43		0.36		0.84		14		0.579		0.573
00:35	2		75		0.75		0.64		0.85		22		0.83		0.829
00:37	1.9		75		0.72		0.6		0.84		21		0.722		0.707
00:39	2.3		75		0.87		0.72		0.83		25		0.857		0.91
00:41	2.3		75		0.89		0.74		0.83		25		1.001		0.959
00:43	2.4		75		0.9		0.75		0.83		26		0.941		0.912
00:46	2.2		75		0.85		0.71		0.84		25		0.933		0.889
00:48	2.2		75		0.84		0.71		0.84		25		0.854		0.922
00:50	2.5		76		0.94		0.8		0.86		29		0.939		0.94
00:52	2.3		76		0.88		0.77		0.87		28		0.954		0.964
00:54	2.4		76		0.92		0.82		0.89		30		1.043		1.052
00:56	2.5		78		0.97		0.88		0.9		33		1.021		1.051
00:58	0.1		78		0.02		0.02		0.97		6		0.214		1.153
01:01	3.6		76		1.35		1.23		0.91		39		2.308		1.272
01:03	2.6		76		1		0.91		0.91		34		1.043		1.071
01:05	2.6		76		1		0.92		0.91		35		1.125		1.104
01:07	2.7		76		1.01		0.94		0.92		35		1.208		1.293
01:09	2.6		76		0.99		0.91		0.92		32		1.125		1.232
01:11	3		76		1.15		1.05		0.91		38		1.371		1.488
01:14	2.9		76		1.1		1		0.91		36		1.353		1.346
01:15	2.9		80		1.09		0.96		0.88		37		1.148		1.144
01:17	3.1		80		1.18		1.03		0.88		38		1.125		1.1
01:19	3		80		1.14		0.99		0.87		36		1.084		1.175
01:21	3.2		84		1.22		1.04		0.86		38		1.171		1.134
01:23	3.1		84		1.18		0.99		0.85		36		1.115		1.12
01:25	3.2		85		1.23		1.03		0.84		37		1.271		1.271
01:27	3.1		85		1.2		1		0.84		37		1.162		1.21
01:28	3.3		85		1.26		1.06		0.84		40		1.213		1.174
01:30	3.3		86		1.26		1.05		0.83		38		1.219		1.268
01:32	3.2		86		1.2		0.98		0.82		36		1.074		1.085
01:34	3.5		86		1.32		1.09		0.82		38		1.192		1.23
01:36	3.5		86		1.35		1.12		0.83		39		1.296		1.334
01:38	3.5		86		1.32		1.09		0.83		38		1.253		1.309
01:40	3.6		86		1.36		1.12		0.82		39		1.261		1.311
01:42	3.4		86		1.3		1.07		0.83		39		1.22		1.291
01:44	3.7		86		1.41		1.18		0.84		42		1.258		1.293
01:45	3.5		88		1.35		1.12		0.83		41		1.236		1.213
01:47	3.4		88		1.3		1.09		0.84		40		1.066		1.164
01:49	3.7		88		1.42		1.2		0.84		42		1.305		1.318
01:51	3.6		88		1.38		1.16		0.84		41		1.222		1.266
01:52	3.3		88		1.28		1.09		0.86		41		1.185		1.223
01:54	3.7		89		1.41		1.2		0.85		43		1.295		1.326
01:56	3.6		89		1.36		1.15		0.85		40		1.297		1.298
01:58	3.4		89		1.31		1.1		0.84		37		1.205		1.193
02:00	3.7		90		1.4		1.15		0.83		40		1.119		1.236
02:02	3.6		90		1.36		1.13		0.83		38		1.222		1.286
02:04	3.7		90		1.42		1.2		0.84		42		1.241		1.34
02:05	3.6		90		1.37		1.16		0.85		41		1.203		1.358
02:07	3.7		90		1.39		1.18		0.85		43		1.118		1.166
02:09	3.6		90		1.38		1.18		0.86		42		1.187		1.163
02:10	3.7		90		1.39		1.2		0.86		42		1.297		1.33
02:12	3.7		90		1.41		1.23		0.87		43		1.393		1.464
02:14	3.4		89		1.31		1.13		0.86		39		1.278		1.296
02:16	3.5		89		1.35		1.16		0.86		41		1.249		1.34
02:18	3.6		89		1.38		1.2		0.87		42		1.231		1.299
02:20	3.7		90		1.41		1.22		0.87		42		1.332		1.326
02:22	3.8		90		1.43		1.25		0.87		43		1.386		1.402
02:23	3.9		90		1.5		1.32		0.88		47		1.301		1.427
02:25	3.6		91		1.36		1.19		0.88		42		1.322		1.31
02:27	3.8		91		1.44		1.27		0.88		42		1.545		1.488
02:29	4.1		91		1.56		1.37		0.88		47		1.538		1.588
02:31	4.1		91		1.55		1.38		0.89		47		1.516		1.561
02:33	3.8		91		1.46		1.31		0.9		45		1.449		1.551
02:35	4		92		1.54		1.39		0.91		49		1.426		1.555
02:37	3.8		92		1.46		1.34		0.92		48		1.369		1.459
02:38	3.8		92		1.43		1.31		0.91		45		1.273		1.352
02:40	3.8		93		1.43		1.31		0.92		46		1.403		1.357
02:42	3.8		93		1.44		1.31		0.91		45		1.473		1.494
02:44	3.7		93		1.42		1.3		0.92		45		1.432		1.555
02:46	3.6		93		1.38		1.26		0.91		43		1.355		1.457
02:48	3.7		93		1.42		1.29		0.91		43		1.319		1.344
02:50	3.6		93		1.36		1.24		0.91		42		1.358		1.402
02:52	3.8		93		1.44		1.31		0.91		43		1.498		1.593
02:54	3.7		93		1.42		1.28		0.9		43		1.434		1.541
02:56	3.9		92		1.47		1.33		0.91		44		1.452		1.522
02:58	3.7		92		1.4		1.3		0.93		46		1.395		1.397
03:00	3.6		92		1.36		1.26		0.92		42		1.442		1.56
03:02	3.6		92		1.38		1.24		0.9		41		1.412		1.369
03:04	3.2		92		1.21		1.07		0.89		36		1.272		1.431
03:06	4.3		91		1.64		1.47		0.9		48		1.528		1.588
03:08	4.2		91		1.6		1.45		0.91		50		1.512		1.657
03:10	3.9		91		1.5		1.37		0.91		46		1.56		1.551
03:12	4		91		1.52		1.4		0.92		48		1.554		1.651
03:14	3.6		91		1.38		1.28		0.92		43		1.476		1.551
03:16	3.6		92		1.36		1.3		0.96		44		1.684		1.823
03:18	3.7		92		1.4		1.32		0.94		43		1.556		1.595
03:20	3.5		87		1.34		1.25		0.93		41		1.438		1.612
03:22	3.9		87		1.48		1.37		0.93		46		1.467		1.582
03:24	3.6		87		1.39		1.29		0.93		44		1.348		1.476
03:26	3.7		88		1.43		1.37		0.96		48		1.478		1.404
03:28	3.6		88		1.37		1.29		0.94		46		1.457		1.586
03:30	3.5		93		1.34		1.26		0.94		43		1.221		1.326
03:31	3.9		93		1.47		1.37		0.93		45		1.338		1.228
03:33	3.6		93		1.38		1.3		0.94		45		1.401		1.454
03:35	3.8		94		1.43		1.32		0.92		43		1.376		1.483
03:37	4.1		94		1.57		1.44		0.92		47		1.6		1.672
03:39	3.9		94		1.48		1.34		0.9		43		1.392		1.407
03:41	3.8		94		1.45		1.3		0.9		42		1.354		1.441
03:43	3.9		94		1.5		1.34		0.89		45		1.397		1.467
03:45	3.9		93		1.5		1.36		0.9		45		1.464		1.488
03:47	4		93		1.52		1.38		0.9		46		1.472		1.602
03:49	4		93		1.52		1.38		0.91		47		1.421		1.551
03:51	4.1		92		1.54		1.41		0.91		47		1.634		1.578
03:53	3.8		92		1.46		1.34		0.92		45		1.787		1.804
03:55	3.9		93		1.5		1.38		0.92		46		1.471		1.76
03:57	4		93		1.52		1.42		0.93		47		1.623		1.708
03:59	4		93		1.51		1.41		0.93		45		1.605		1.698
04:01	4		93		1.52		1.42		0.94		47		1.581		1.617
04:03	3.8		93		1.45		1.36		0.94		46		1.466		1.617
04:05	3.8		93		1.46		1.42		0.97		50		1.624		1.666
04:07	3.6		93		1.37		1.33		0.97		48		1.419		1.544
04:09	3.7		93		1.42		1.43		1.01		54		1.599		1.616
04:11	3.4		95		1.28		1.33		1.04		49		1.632		1.81
04:13	3.8		95		1.43		1.48		1.03		52		1.756		1.724
04:15	3.5		95		1.35		1.36		1.01		47		1.547		1.662
04:17	3.7		95		1.42		1.41		0.99		47		1.632		1.664
04:18	3.7		95		1.42		1.39		0.98		48		1.39		1.57
04:20	3.8		93		1.44		1.39		0.96		47		1.24		1.201
04:22	4		93		1.54		1.48		0.96		49		1.465		1.529
04:24	4		93		1.51		1.45		0.96		48		1.453		1.556
04:26	3.9		96		1.5		1.42		0.95		45		1.457		1.537
04:27	3.9		96		1.48		1.38		0.93		46		1.317		1.389
04:29	3.9		96		1.49		1.4		0.94		47		1.297		1.444
04:31	4.3		96		1.63		1.53		0.94		51		1.418		1.42
04:33	3.9		96		1.48		1.4		0.95		46		1.546		1.603
04:34	3.9		94		1.5		1.42		0.95		49		1.332		1.489
04:36	4		94		1.52		1.45		0.96		49		1.49		1.55
04:38	3.9		94		1.49		1.43		0.96		48		1.484		1.589
04:40	4.1		94		1.55		1.5		0.97		51		1.625		1.696
04:42	3.9		94		1.5		1.45		0.97		50		1.639		1.711
04:44	3.9		94		1.5		1.47		0.98		51		1.655		1.771
04:46	3.8		95		1.44		1.42		0.98		48		1.517		1.596
04:47	3.8		95		1.46		1.44		0.98		51		1.5		1.643
04:49	3.9		95		1.5		1.47		0.98		52		1.427		1.443
04:51	3.9		96		1.47		1.46		0.99		50		1.441		1.553
04:53	4		96		1.53		1.51		0.98		52		1.455		1.498
04:54	3.8		96		1.46		1.45		0.99		49		1.545		1.609
04:56	4		96		1.52		1.48		0.97		51		1.472		1.552
04:58	4		96		1.52		1.49		0.98		51		1.543		1.569
05:00	4.1		96		1.55		1.52		0.98		52		1.455		1.558
05:02	3.9		96		1.48		1.45		0.98		49		1.536		1.611
05:03	3.8		96		1.45		1.42		0.98		49		1.481		1.702
05:05	3.4		95		1.29		1.24		0.96		38		1.376		1.246
05:07	0		95		0.01		0.01		1.11		9		0.208		0.508
05:12	3.7		95		1.41		1.15		0.82		30		2.748		1.946
05:15	5.7		94		2.17		1.74		0.8		50		2.097		2.039
05:17	3.9		94		1.49		1.21		0.81		30		1.279		1.56
05:19	5.8		93		2.19		1.89		0.86		61		2.087		2.465
05:21	5.3		93		2.04		1.87		0.92		62		2.114		2.144
05:24	4.5		93		1.72		1.67		0.97		59		2.004		2.159
05:25	4.2		93		1.61		1.64		1.02		61		1.911		2.16
05:27	4.3		93		1.65		1.75		1.06		66		2.119		2.117
05:29	3.6		93		1.36		1.46		1.07		56		1.661		1.861
05:31	3.9		94		1.48		1.61		1.09		60		1.796		1.91
05:33	3.7		94		1.41		1.54		1.1		57		1.721		1.902
05:34	3.7		96		1.42		1.55		1.09		56		1.581		1.722
05:37	2.9		96		1.11		1.15		1.04		36		1.752		1.665
05:39	4.5		96		1.73		1.78		1.03		60		1.609		1.721
05:41	4.2		96		1.61		1.69		1.05		60		1.669		1.764
05:42	3.9		96		1.47		1.56		1.06		56		1.601		1.73
05:44	4.1		96		1.55		1.64		1.05		59		1.766		1.763
05:46	3.6		97		1.37		1.45		1.06		55		1.474		1.645
05:47	3.6		97		1.37		1.46		1.06		55		1.57		1.617
05:49	3.8		97		1.44		1.55		1.07		56		1.706		1.788
05:51	3.5		97		1.34		1.41		1.05		52		1.483		1.596
05:53	3.5		97		1.32		1.38		1.05		49		1.435		1.406
05:55	3.6		97		1.37		1.42		1.04		49		1.534		1.659
05:56	3.6		97		1.38		1.4		1.02		50		1.416		1.56
05:58	3		97		1.14		1.18		1.03		40		1.152		1.211
06:00	4.1		97		1.58		1.61		1.02		55		1.588		1.682
06:02	3.9		97		1.48		1.49		1.01		51		1.488		1.626
06:03	4		97		1.52		1.53		1.01		52		1.648		1.727
06:05	3.8		97		1.47		1.47		1		51		1.407		1.536
06:07	4.2		97		1.58		1.59		1.01		57		1.638		1.7
06:09	3.5		97		1.33		1.37		1.03		49		1.537		1.657
06:10	3.7		97		1.41		1.44		1.02		51		1.511		1.68
06:12	4		97		1.52		1.55		1.02		53		1.601		1.704
06:14	4.1		97		1.56		1.61		1.03		57		1.855		1.951
06:16	3.7		97		1.4		1.43		1.03		47		1.71		1.702
06:18	3.8		97		1.44		1.44		1.01		49		1.597		1.708
06:20	3.9		97		1.5		1.5		1		52		1.534		1.673
06:22	4		97		1.52		1.54		1.02		53		1.601		1.686
06:24	4		97		1.53		1.55		1.02		53		1.57		1.615
06:25	3.9		97		1.47		1.48		1.01		53		1.522		1.668
06:27	3.6		97		1.38		1.41		1.02		49		1.541		1.651
06:29	3.3		97		1.25		1.25		0.99		42		1.378		1.463
06:31	3.1		97		1.17		1.17		1		42		1.212		1.53
06:31	Recovery
06:33	3.6		97		1.38		1.33		0.96		41		1.43		1.266
06:35	4.7		97		1.78		1.73		0.98		56		1.801		1.679
06:37	3.7		97		1.4		1.41		1		50		1.601		1.723
06:38	3.2		97		1.24		1.22		0.99		44		1.03		1.027
06:40	3.8		97		1.46		1.44		0.99		51		1.297		1.355
06:42	3.5		97		1.34		1.35		1.01		46		1.36		1.485
06:44	3.9		97		1.47		1.48		1.01		50		1.483		1.553
06:46	3.9		95		1.48		1.49		1		49		1.71		1.748
06:48	3.5		95		1.33		1.3		0.98		42		1.352		1.435
06:51	2.5		92		0.95		0.87		0.92		24		1.243		1.199
06:53	3.5		92		1.33		1.17		0.88		35		1.265		1.244
06:55	3.9		92		1.49		1.31		0.88		38		1.298		1.387
06:56	3.6		92		1.36		1.18		0.87		37		1		1.102
06:58	4.1		92		1.57		1.42		0.9		43		1.438		1.548
07:00	4		89		1.52		1.39		0.92		44		1.307		1.415
07:02	3.9		89		1.47		1.36		0.92		44		1.216		1.2
07:04	3.9		89		1.47		1.42		0.97		49		1.349		1.429
07:05	3.2		86		1.24		1.18		0.95		40		1.136		1
07:07	3.2		86		1.22		1.21		0.99		43		1.282		1.434
07:09	3.3		86		1.25		1.24		1		41		1.385		1.348
07:11	3		84		1.16		1.18		1.02		40		1.405		1.474
07:13	2.6		84		0.99		1.03		1.04		34		1.21		1.301
07:15	2.9		83		1.11		1.14		1.03		37		1.316		1.35
07:18	3.1		83		1.17		1.21		1.03		38		1.493		1.542
07:20	2.9		80		1.11		1.15		1.03		37		1.377		1.452
07:22	2.9		80		1.11		1.15		1.04		36		1.439		1.473
07:25	2.7		77		1.04		1.07		1.03		34		1.306		1.344
07:27	2.6		77		0.99		1.02		1.03		32		1.254		1.316
07:30	2.6		75		1		1.04		1.03		32		1.297		1.327
07:32	2.5		75		0.95		1		1.05		32		1.342		1.388
07:34	2.7		75		1.02		1.08		1.06		35		1.36		1.427
07:37	2.4		75		0.91		0.97		1.07		32		1.244		1.349
07:39	2.5		75		0.94		1.02		1.09		35		1.265		1.293
07:41	2.5		76		0.95		1.07		1.13		37		1.413		1.447
07:44	2.4		76		0.92		1.06		1.16		38		1.519		1.438
07:46	2		80		0.76		0.89		1.17		31		1.22		1.343
07:48	2		80		0.76		0.87		1.15		30		1.151		1.105
07:51	2.1		81		0.82		0.94		1.15		32		1.28		1.292
07:53	2		81		0.78		0.91		1.17		31		1.267		1.317
07:55	2		78		0.75		0.86		1.15		30		1.013		1.046
07:57	2.1		78		0.79		0.91		1.15		33		1.032		1.1
08:00	1.6		76		0.62		0.71		1.14		23		1.124		1.074
08:03	2.1		76		0.81		0.93		1.15		31		1.308		1.559
08:05	2		75		0.77		0.84		1.1		27		1.053		0.827
08:07	2.2		75		0.86		0.94		1.09		31		1.054		0.983
08:09	1.5		75		0.58		0.64		1.1		20		0.8		0.999
08:13	1.7		75		0.65		0.7		1.08		20		1.257		1.252
08:15	2.2		75		0.85		0.87		1.02		27		1		0.917
08:18	2.4		75		0.9		0.91		1.02		28		1.072		1.17
08:20	2.4		75		0.92		0.94		1.03		32		1.067		1.18
08:21	2.1		75		0.8		0.83		1.04		30		0.866		1.015
08:24	1.8		76		0.69		0.73		1.06		25		1.284		1.071
08:27	2.6		76		1		1.09		1.09		37		1.604		1.39
08:29	2		77		0.75		0.84		1.12		29		1.196		1.238
08:32	1.9		77		0.71		0.81		1.14		28		1.161		1.145
08:34	1.8		76		0.67		0.77		1.15		27		1.122		1.074
08:37	1.4		76		0.54		0.62		1.14		21		0.989		0.927
08:40			77						1.07				0.275		0.98
08:56			75
09:12			75
09:28			75
09:43			75
09:59			75
10:15			75
10:31			75
10:46			75
	3.38211	0.648903	88.2745	62.2314	1.28886	0.0938901	1.22467	0.0825964	0.957206	0.00771696	41.9715	97.7584	1.36597	0.0863253	1.42164	0.0819818
	METS						HR						VO2						VCO2						RER						VE						Vtex						Vtin						LABEL
	Rest		Test		Recovery		Rest		Test		Recovery		Rest		Test		Recovery		Rest		Test		Recovery		Rest		Test		Recovery		Rest		Test		Recovery		Rest		Test		Recovery		Rest		Test		Recovery
	MEDIA	VAR	MEDIA	VAR	MEDIA	VAR	MEDIA	VAR	MEDIA	VAR	MEDIA	VAR	MEDIA	VAR	MEDIA	VAR	MEDIA	VAR	MEDIA	VAR	MEDIA	VAR	MEDIA	VAR	MEDIA	VAR	MEDIA	VAR	MEDIA	VAR	MEDIA	VAR	MEDIA	VAR	MEDIA	VAR	MEDIA	VAR	MEDIA	VAR	MEDIA	VAR	MEDIA	VAR	MEDIA	VAR	MEDIA	VAR	BIN
	1.62222	0.361944	3.5709	0.505159	2.75614	0.623935	76	1.14286	90.5608	41.9391	81.7273	63.1552	0.615556	0.0511278	1.36063	0.0733592	1.05088	0.0894581	0.576667	0.041925	1.27	0.0810064	1.07439	0.0594858	0.943333	0.001275	0.931164	0.00522843	1.04207	0.00648336	21	46.5	43.9471	90.3802	35.4211	67.4267	0.905333	0.0698967	1.40199	0.0910556	1.24859	0.0539144	0.862375	0.0476354	1.46372	0.0863373	1.28452	0.0440492	0
	1.62222	0.361944	3.5709	0.505159	2.75614	0.623935	76	1.14286	90.5608	41.9391	81.7273	63.1552	0.615556	0.0511278	1.36063	0.0733592	1.05088	0.0894581	0.576667	0.041925	1.27	0.0810064	1.07439	0.0594858	0.943333	0.001275	0.931164	0.00522843	1.04207	0.00648336	21	46.5	43.9471	90.3802	35.4211	67.4267	0.905333	0.0698967	1.40199	0.0910556	1.24859	0.0539144	0.862375	0.0476354	1.46372	0.0863373	1.28452	0.0440492	0
[truncated: 1 more columns]
