# Supplementary material for: On the development of diagnostic support algorithms based on CPET biosignals data via machine learning and wavelets
Source: PeerJ journal article supplement (doi:10.7717/peerj-cs.2474), 2025-01-30
Supplement: raw_data.zip [file Subject16_BxB.xlsx]

## Sheet: Demographics
Gender:	female
Age:	57
Height (cm):	172
Weight (kg):	95.7
BMI:	32
Condition:	Metabolic Syndrome

## Sheet: Subject16_BxB
Time	METS		HR		V'O2		V'CO2		RER		V'E		VTex		VTin
min			1/min		L/min		L/min				L/min		L		L
00:00	Rest
03:26									0.96				1.198
03:33	0.7		75		0.25		0.25		0.98		9		1.035		2.643
03:41	0.5		80		0.16		0.13		0.85		5		0.622		0.409
03:49	1.2		85		0.4		0.34		0.85		11		1.476		1.862
03:57	0.8		79		0.28		0.22		0.8		7		1.021		1.17
04:07	0.5		78		0.18		0.15		0.86		5		0.815		0.977
04:14	1		78		0.32		0.27		0.82		9		1.029		1.054
04:21	0.8		79		0.27		0.23		0.86		8		0.946		1.161
04:26	0.6		78		0.22		0.18		0.83		7		0.588		0.62
04:33	1.2		77		0.39		0.32		0.83		10		1.211		0.899
04:33	Test
04:46	1.1		88		0.36		0.27		0.74		8		1.65		1.675
04:51	1.5		86		0.51		0.36		0.72		11		0.99		0.894
04:56	1.7		85		0.58		0.41		0.71		12		0.952		1.081
05:03	2.5		85		0.83		0.64		0.77		19		2.091		2.125
05:06	1.3		86		0.44		0.32		0.74		11		0.631		0.607
05:11	1.9		87		0.63		0.47		0.75		14		1.211		1.284
05:16	1.6		89		0.55		0.4		0.72		12		0.907		0.844
05:21	1.9		91		0.65		0.46		0.71		14		1.225		1.389
05:25	1.9		92		0.65		0.46		0.7		14		0.954		1.107
05:29	2		92		0.67		0.46		0.69		14		0.848		0.922
05:34	2.3		94		0.77		0.54		0.7		16		1.301		1.714
05:37	2.7		96		0.9		0.63		0.7		18		1.064		0.939
05:40	2.5		96		0.83		0.55		0.67		16		0.83		0.772
05:44	2.7		96		0.92		0.61		0.66		18		1.02		1.09
05:49	3.4		104		1.15		0.84		0.73		25		2.29		2.455
05:51	1		111		0.35		0.24		0.69		12		0.379		0.79
05:56	3.1		109		1.03		0.71		0.68		19		1.457		1.057
05:59	3.2		109		1.07		0.71		0.66		19		1.074		1.021
06:04	3.7		108		1.24		0.9		0.73		27		2.072		2.535
06:05	3.2		102		1.07		0.72		0.67		19		0.432		0.144
06:09	3		102		1.01		0.7		0.69		20		1.138		1.249
06:13	3.9		103		1.31		0.94		0.71		25		1.949		1.922
06:17	3.1		103		1.04		0.74		0.72		21		1.216		1.389
06:20	3.6		106		1.22		0.88		0.73		25		1.502		1.54
06:26	3.6		109		1.22		0.94		0.77		27		2.351		2.433
06:29	2.8		109		0.94		0.68		0.73		19		1.146		1.202
06:34	3.6		108		1.22		0.93		0.76		25		2.079		2.244
06:38	2.7		108		0.91		0.67		0.74		19		1.146		1.246
06:41	3.6		108		1.2		0.87		0.72		23		1.212		1.25
06:45	4		108		1.33		1.01		0.76		27		2.121		2.219
06:49	3.3		108		1.11		0.86		0.77		24		1.354		1.563
06:52	3.3		108		1.11		0.85		0.77		23		1.304		1.341
06:57	3.9		107		1.31		1.05		0.8		28		2.499		2.546
07:01	3.3		106		1.09		0.86		0.79		24		1.382		1.403
07:04	3.6		105		1.21		0.94		0.78		25		1.441		1.455
07:09	3.8		105		1.28		1.05		0.82		29		2.215		2.365
07:13	3.2		108		1.07		0.85		0.8		24		1.38		1.499
07:16	3.5		108		1.18		0.93		0.78		25		1.396		1.458
07:21	4.1		110		1.37		1.13		0.83		31		2.428		2.479
07:24	3		110		1.01		0.81		0.8		23		1.317		1.466
07:27	3.2		109		1.08		0.85		0.79		23		1.308		1.37
07:31	3.5		108		1.16		0.9		0.78		25		1.307		1.327
07:34	3.8		108		1.26		1		0.8		28		1.702		1.877
07:38	3.1		108		1.05		0.84		0.8		23		1.475		1.573
07:42	3.9		108		1.32		1.04		0.79		28		1.575		1.538
07:46	4		108		1.33		1.11		0.83		31		2.298		2.52
07:49	3.6		108		1.2		0.98		0.81		27		1.426		1.373
07:53	3.3		108		1.12		0.9		0.81		25		1.428		1.532
07:57	3.9		108		1.32		1.11		0.84		31		2.248		2.354
08:01	3		108		0.99		0.83		0.84		23		1.32		1.454
08:04	3.2		108		1.07		0.85		0.8		23		1.24		1.313
08:08	3.5		106		1.18		0.98		0.83		27		1.852		2.001
08:12	3.2		108		1.06		0.86		0.81		22		1.546		1.674
08:15	3.6		108		1.21		0.95		0.78		26		1.265		1.248
08:18	3.4		108		1.13		0.89		0.78		24		1.378		1.516
08:22	4.3		108		1.45		1.18		0.82		32		2.042		2.013
08:26	3.9		109		1.31		1.11		0.85		32		2.128		2.265
08:30	3.4		109		1.12		0.94		0.84		26		1.411		1.469
08:33	3.6		109		1.19		1.01		0.85		28		1.747		1.857
08:36	3.2		109		1.08		0.88		0.82		24		1.193		1.238
08:40	3.5		109		1.17		0.96		0.82		26		1.622		1.744
08:44	3.9		109		1.3		1.09		0.84		30		1.963		2.052
08:48	3.6		109		1.21		1.01		0.83		28		1.605		1.636
08:52	3.9		111		1.31		1.14		0.87		31		2.523		2.711
08:55	3.3		112		1.1		0.91		0.83		26		1.194		1.222
08:58	3.7		112		1.24		1.01		0.81		28		1.324		1.389
09:01	4		112		1.36		1.1		0.81		30		1.448		1.463
09:05	3.9		115		1.32		1.12		0.85		31		2.064		2.241
09:08	3.8		115		1.28		1.08		0.84		29		1.55		1.566
09:12	4.4		115		1.46		1.27		0.87		35		2.334		2.412
09:16	3.6		115		1.19		1.03		0.86		28		1.669		1.809
09:20	4.1		116		1.36		1.18		0.86		31		1.956		1.994
09:25	3.9		117		1.32		1.17		0.89		31		2.808		2.778
09:28	3.5		117		1.17		0.97		0.83		26		1.294		1.44
09:32	4		115		1.33		1.16		0.88		32		2.166		2.426
09:35	3.7		117		1.26		1.07		0.85		29		1.53		1.55
09:38	3.8		117		1.26		1.03		0.82		28		1.291		1.303
09:41	3.6		117		1.21		1.01		0.84		27		1.545		1.773
09:44	5.1		116		1.72		1.43		0.83		38		1.791		1.758
09:48	4.3		116		1.44		1.31		0.91		37		2.365		2.529
09:51	3.8		115		1.28		1.13		0.88		31		1.704		1.7
09:55	4.2		115		1.4		1.23		0.88		33		1.894		1.934
09:59	4.1		115		1.37		1.22		0.89		33		2.053		2.115
10:02	3.7		118		1.24		1.09		0.88		30		1.687		1.831
10:06	4.6		121		1.55		1.41		0.91		40		2.528		2.58
10:09	3.5		121		1.18		1.05		0.89		30		1.417		1.615
10:11	3.1		121		1.05		0.88		0.84		26		1.032		1.105
10:15	4.6		120		1.55		1.32		0.85		34		2.121		2.04
10:18	4.3		120		1.45		1.28		0.88		35		2.215		2.441
10:22	4.2		120		1.39		1.24		0.89		34		1.842		1.877
10:25	4.3		120		1.42		1.27		0.89		35		1.964		1.964
10:28	4.3		120		1.43		1.26		0.88		34		1.7		1.711
10:31	4.2		121		1.4		1.24		0.88		34		1.651		1.803
10:34	4.6		122		1.54		1.41		0.91		40		2.233		2.263
10:38	3.7		122		1.24		1.11		0.9		30		1.625		1.776
10:42	4.4		122		1.47		1.35		0.92		37		2.56		2.561
10:45	3.7		123		1.25		1.12		0.89		31		1.713		1.877
10:48	5.1		123		1.71		1.56		0.91		42		2.431		2.339
10:51	4.7		126		1.56		1.41		0.9		39		1.888		1.995
10:54	5.1		127		1.72		1.58		0.92		44		2.075		2.061
10:57	4.7		127		1.57		1.49		0.95		43		1.969		2.184
11:00	4.6		130		1.55		1.49		0.96		42		1.982		1.98
11:03	4		130		1.34		1.27		0.94		36		1.751		1.875
11:06	4.5		131		1.52		1.45		0.96		39		2.37		2.439
11:10	3.9		131		1.29		1.19		0.92		31		1.83		1.902
11:13	5.4		131		1.8		1.69		0.94		45		2.554		2.528
11:16	4.9		130		1.64		1.54		0.94		43		1.945		2.081
11:19	4.7		130		1.56		1.46		0.94		40		1.741		1.795
11:22	4.8		130		1.6		1.52		0.95		42		1.952		2.045
11:24	4.9		130		1.63		1.55		0.95		44		1.9		1.944
11:27	4.8		133		1.6		1.53		0.95		41		1.991		1.896
11:30	5		133		1.67		1.63		0.98		45		2.437		2.565
11:33	4.4		133		1.46		1.41		0.96		39		1.685		1.885
11:36	4.1		133		1.36		1.3		0.95		34		1.763		1.842
11:40	4.7		134		1.56		1.49		0.96		39		2.618		2.768
11:43	5		134		1.66		1.59		0.96		44		2.044		2.168
11:45	5		134		1.68		1.58		0.94		42		1.855		1.797
11:48	5.1		134		1.7		1.66		0.97		46		2.196		2.313
11:51	5.1		134		1.7		1.67		0.98		47		1.916		1.973
11:53	5.1		134		1.72		1.72		1		47		2.214		2.206
11:56	4.7		136		1.59		1.57		0.99		43		1.804		1.855
11:59	5		136		1.67		1.69		1.01		46		2.324		2.373
12:02	4.7		136		1.59		1.61		1.01		44		2.127		2.183
12:05	3.8		137		1.29		1.28		0.99		35		1.643		1.938
12:08	4.7		137		1.58		1.58		1		43		2.112		2.186
12:10	5.2		139		1.75		1.73		0.99		48		1.993		2.131
12:12	4.9		139		1.64		1.59		0.97		45		1.631		1.683
12:15	5.5		137		1.83		1.83		1		51		2.356		2.386
12:18	4.9		137		1.64		1.64		1		46		1.905		1.959
12:20	5.2		137		1.74		1.76		1.01		49		2.327		2.323
12:23	4.7		137		1.57		1.56		0.99		44		1.696		1.819
12:25	4.8		137		1.62		1.61		1		45		1.856		1.985
12:28	4.2		137		1.39		1.37		0.98		37		1.615		1.855
12:31	5.4		137		1.82		1.85		1.02		52		2.385		2.536
12:33	4.2		137		1.41		1.39		0.99		37		1.754		1.834
12:36	4.8		139		1.62		1.62		1		45		2.202		2.182
12:39	5.5		139		1.84		1.82		0.99		50		1.942		1.928
12:41	5.3		139		1.78		1.8		1.01		50		2.152		2.206
12:44	5.3		139		1.79		1.84		1.03		53		2.166		2.256
12:46	5.2		141		1.74		1.82		1.05		53		2.336		2.351
12:49	4.9		141		1.65		1.7		1.03		49		1.931		2.001
12:51	5.4		142		1.8		1.91		1.06		55		2.454		2.522
12:54	5		142		1.69		1.76		1.04		52		1.989		1.968
12:56	5.1		142		1.72		1.8		1.05		52		2.162		2.247
12:59	5.2		142		1.74		1.84		1.06		53		2.342		2.353
13:01	5.1		144		1.7		1.76		1.04		52		1.829		1.977
13:03	5.1		144		1.71		1.78		1.04		51		1.903		2.011
13:06	4.2		146		1.4		1.44		1.03		40		1.851		1.971
13:09	4.6		146		1.55		1.62		1.04		46		2.606		2.687
13:12	5.9		146		1.96		2.02		1.03		57		2.231		2.194
13:14	5.4		146		1.81		1.88		1.04		53		2.149		2.251
13:17	5.2		148		1.75		1.86		1.06		54		2.432		2.487
13:19	5.2		148		1.74		1.79		1.03		51		1.872		1.915
13:21	5		148		1.69		1.75		1.04		50		1.883		2.051
13:24	4.9		150		1.65		1.76		1.07		49		2.614		2.746
13:27	4.4		150		1.47		1.48		1		41		1.727		1.856
13:29	5.8		150		1.93		1.93		1		55		2.144		2.153
13:32	5.8		150		1.94		2		1.03		58		2.221		2.276
13:34	5.5		150		1.83		1.9		1.04		56		2.105		2.114
13:36	5.3		150		1.78		1.85		1.04		55		2.042		2.142
13:38	5.4		150		1.8		1.9		1.06		55		2.051		2.137
13:41	5.3		151		1.76		1.87		1.06		54		2.138		2.222
13:43	5.3		151		1.79		1.86		1.04		54		1.884		1.961
13:45	5.6		151		1.89		1.99		1.06		58		2.26		2.289
13:47	5.2		151		1.74		1.83		1.05		54		1.898		2.027
13:49	5.8		153		1.95		2.1		1.08		61		2.311		2.385
13:52	5.1		153		1.72		1.82		1.06		54		1.924		1.941
13:54	5.4		153		1.79		1.94		1.08		58		2.039		2.049
13:56	5.6		153		1.87		2.04		1.09		61		2.264		2.402
13:58	5.5		153		1.84		2.03		1.1		61		2.223		2.268
14:00	5.4		155		1.8		1.98		1.1		59		2.095		2.108
14:03	5.2		155		1.75		1.95		1.11		59		2.286		2.409
14:05	4.2		157		1.42		1.54		1.08		43		1.63		1.814
14:07	5.7		157		1.9		2.05		1.08		60		2.096		2.164
14:09	5.2		157		1.75		1.87		1.07		55		1.826		1.957
14:11	5.4		157		1.8		1.94		1.08		57		2.048		2.088
14:13	5.6		157		1.88		2.05		1.09		61		2.204		2.345
14:15	5.4		155		1.81		1.97		1.09		59		2.27		2.228
14:17	5.4		155		1.81		1.95		1.08		58		1.904		2.035
14:20	5.2		155		1.73		1.86		1.07		55		1.918		2.005
14:22	5.4		155		1.79		1.91		1.07		56		1.918		1.98
14:24	5.6		155		1.88		2.03		1.08		60		2.148		2.252
14:26	4.7		155		1.58		1.68		1.06		46		1.781		1.982
14:28	5.9		155		1.98		2.14		1.08		65		2.379		2.509
14:30	5.7		155		1.92		2.11		1.09		66		2.121		2.158
14:32	5.7		155		1.89		2.09		1.11		66		2.179		2.312
14:34	5.6		155		1.87		2.07		1.11		64		2.103		2.074
14:36	5.4		157		1.8		1.97		1.09		61		1.935		2.033
14:38	5.6		157		1.86		2.07		1.11		63		2.157		2.208
14:40	5.3		157		1.77		1.96		1.11		60		2.036		2.149
14:42	5.5		157		1.83		2.03		1.11		62		2.141		2.2
14:44	5.3		160		1.79		1.99		1.11		61		2.257		2.279
14:46	5.7		160		1.9		2.07		1.09		63		2.14		2.136
14:49	5.3		160		1.79		2		1.12		61		2.46		2.616
14:51	5.4		160		1.8		1.95		1.08		60		1.907		1.952
14:53	5.7		160		1.92		2.12		1.11		65		2.241		2.285
14:55	5.2		162		1.76		1.96		1.11		59		2.353		2.4
14:57	5.7		162		1.91		2.1		1.1		65		2.135		2.172
14:59	5.7		162		1.91		2.13		1.12		67		2.27		2.357
15:01	5.4		162		1.81		2.01		1.11		62		1.946		2.019
15:03	5.5		162		1.83		2.05		1.12		64		2.122		2.198
15:05	5.8		164		1.93		2.18		1.13		68		2.388		2.38
15:07	5.2		164		1.73		1.93		1.12		60		1.91		2.036
15:09	5.7		164		1.89		2.14		1.13		65		2.182		2.15
15:11	5.3		164		1.78		1.98		1.11		60		1.931		2.056
15:13	5.4		164		1.82		2.06		1.13		63		2.229		2.336
15:16	5.2		164		1.75		1.98		1.13		59		2.358		2.376
15:18	5.8		164		1.94		2.19		1.12		68		2.242		2.347
15:19	5.7		164		1.92		2.16		1.12		68		2.099		2.142
15:22	5.5		164		1.84		2.14		1.16		65		2.589		2.694
15:24	5.2		164		1.75		1.97		1.13		60		1.919		2.029
15:25	5.6		164		1.88		2.1		1.12		64		1.872		1.958
15:27	5.7		164		1.89		2.12		1.12		64		2.021		2.06
15:29	5.8		164		1.93		2.2		1.14		68		2.198		2.217
15:31	5.6		164		1.87		2.14		1.14		67		2.132		2.224
15:33	5.7		164		1.91		2.19		1.15		68		2.272		2.381
15:35	5.5		166		1.86		2.14		1.15		66		2.088		2.162
15:37	5.7		166		1.9		2.21		1.16		69		2.214		2.221
15:39	5.6		166		1.88		2.18		1.16		69		2.093		2.197
15:41	5.5		166		1.85		2.17		1.17		69		2.133		2.208
15:43	5.8		166		1.94		2.3		1.19		73		2.388		2.432
15:44	5.3		166		1.78		2.09		1.17		66		1.984		2.07
15:46	5.5		166		1.85		2.16		1.17		66		2.208		2.147
15:49	5.1		166		1.72		2		1.16		61		2.065		2.185
15:50	5.4		169		1.8		2.06		1.15		62		1.979		2.113
15:52	5.5		169		1.85		2.15		1.16		66		2.143		2.303
15:55	4.9		169		1.63		1.87		1.15		54		1.921		2.098
15:56	5.3		169		1.77		2.01		1.14		60		1.921		2.071
15:58	5.7		169		1.91		2.18		1.14		66		1.961		2.081
16:01	3.8		169		1.28		1.4		1.1		38		1.925		2.076
16:03	6.5		169		2.17		2.41		1.11		71		2.388		2.379
16:05	6.1		169		2.03		2.26		1.11		68		2.119		2.245
16:07	5.9		169		1.97		2.25		1.14		71		2.328		2.436
16:09	5.6		169		1.89		2.18		1.16		70		2.104		2.224
16:11	5.3		166		1.79		2.07		1.16		66		1.986		2.074
16:12	5.5		166		1.83		2.11		1.15		66		1.935		1.979
16:14	5.5		166		1.84		2.14		1.17		68		2.189		2.34
16:16	5.6		166		1.88		2.18		1.16		68		2.098		2.18
16:18	5.6		166		1.88		2.18		1.16		69		2.046		2.106
16:20	5.5		166		1.85		2.14		1.16		67		2.096		2.2
16:22	5.5		166		1.83		2.1		1.15		65		1.983		2.095
16:24	4.8		166		1.61		1.81		1.13		51		1.939		2.046
16:26	5.4		166		1.8		2		1.11		61		1.771		2.023
16:28	5.6		166		1.89		2.11		1.12		65		2.08		2.137
16:30	5.3		166		1.78		2.05		1.15		62		2.338		2.597
16:32	5.6		166		1.89		2.12		1.12		66		1.828		1.918
16:33	5.5		166		1.84		2.07		1.12		65		1.91		2.033
16:33	Recovery
16:35	5.4		164		1.82		2.03		1.12		63		1.896		2.002
16:37	5.6		164		1.86		2.07		1.11		63		1.919		2.001
16:39	5.3		164		1.79		1.99		1.12		60		1.898		2.068
16:41	5.5		162		1.83		2.03		1.11		61		1.926		2.074
16:43	5.6		162		1.87		2.06		1.1		62		1.97		2.07
16:45	5.6		160		1.88		2.08		1.1		63		2.09		2.172
16:47	5.5		160		1.83		2.01		1.1		60		2.105		2.165
16:49	5.4		160		1.79		1.96		1.09		57		2.088		2.147
16:51	5.6		157		1.86		2.03		1.09		60		2.026		2.18
16:53	5.5		157		1.85		2.03		1.1		61		2.054		2.157
16:55	5.4		151		1.82		2.01		1.1		60		2.025		2.05
16:57	5.2		151		1.75		1.96		1.12		58		2.108		2.24
16:59	5.2		148		1.75		1.94		1.11		59		2.006		2.105
17:01	5.4		148		1.81		2.03		1.12		62		2.166		2.228
17:04	5.1		148		1.69		1.92		1.13		58		2.105		2.179
17:06	5		144		1.69		1.94		1.15		59		2.161		2.28
17:08	4.8		144		1.61		1.84		1.14		55		1.96		1.99
17:10	4.6		142		1.54		1.79		1.16		53		1.987		2.124
17:12	4.9		142		1.64		1.91		1.16		58		2.132		2.174
17:15	4.2		139		1.4		1.64		1.18		50		1.851		2.049
17:17	3.8		139		1.26		1.46		1.15		42		1.819		1.88
17:19	4.5		139		1.51		1.75		1.16		52		1.979		2.068
17:22	4.6		139		1.53		1.81		1.18		55		2.038		2.2
17:24	3.1		139		1.05		1.24		1.18		39		1.554		1.955
17:40			129
17:56			129
18:11			117
18:24			118
18:39			115
18:55			108
19:11			109
19:27			107
19:42			102
19:58			102
	4.56753	1.12694	135.278	558.823	1.53004	0.12556	1.53845	0.2724	0.976052	0.0220203	44.9188	280.712	1.90446	0.167027	1.98565	0.176506
	METS						HR						VO2						VCO2						RER						VE						Vtex						Vtin						LABEL
	Rest		Test		Recovery		Rest		Test		Recovery		Rest		Test		Recovery		Rest		Test		Recovery		Rest		Test		Recovery		Rest		Test		Recovery		Rest		Test		Recovery		Rest		Test		Recovery
	MEDIA	VAR	MEDIA	VAR	MEDIA	VAR	MEDIA	VAR	MEDIA	VAR	MEDIA	VAR	MEDIA	VAR	MEDIA	VAR	MEDIA	VAR	MEDIA	VAR	MEDIA	VAR	MEDIA	VAR	MEDIA	VAR	MEDIA	VAR	MEDIA	VAR	MEDIA	VAR	MEDIA	VAR	MEDIA	VAR	MEDIA	VAR	MEDIA	VAR	MEDIA	VAR	MEDIA	VAR	MEDIA	VAR	MEDIA	VAR	BIN
	0.811111	0.0736111	4.52227	1.17588	5.03333	0.404058	78.7778	7.44444	134.632	580.583	139.971	387.726	0.274444	0.00710278	1.51502	0.13105	1.68458	0.0449476	0.232222	0.00514444	1.5036	0.281316	1.89708	0.0416303	0.864	0.00349333	0.961255	0.0216037	1.12833	0.000884058	7.88889	4.36111	43.7368	288.666	57.0833	38.4275	0.9941	0.073581	1.89573	0.180769	1.99429	0.0180704	1.19944	0.45583	1.9739	0.191264	2.10658	0.0095906	1
	0.811111	0.0736111	4.52227	1.17588	5.03333	0.404058	78.7778	7.44444	134.632	580.583	139.971	387.726	0.274444	0.00710278	1.51502	0.13105	1.68458	0.0449476	0.232222	0.00514444	1.5036	0.281316	1.89708	0.0416303	0.864	0.00349333	0.961255	0.0216037	1.12833	0.000884058	7.88889	4.36111	43.7368	288.666	57.0833	38.4275	0.9941	0.073581	1.89573	0.180769	1.99429	0.0180704	1.19944	0.45583	1.9739	0.191264	2.10658	0.0095906	1
[truncated: 1 more columns]
