# Supplementary material for: On the development of diagnostic support algorithms based on CPET biosignals data via machine learning and wavelets
Source: PeerJ journal article supplement (doi:10.7717/peerj-cs.2474), 2025-01-30
Supplement: raw_data.zip [file Subject17_BxB.xlsx]

## Sheet: Demographics
Gender:	male
Age:	54
Height (cm):	184
Weight (kg):	106.9
BMI:	32
Condition:	Metabolic Syndrome

## Sheet: Subject17_BxB
Time	METS		HR		V'O2		V'CO2		RER		V'E		VTex		VTin
min			1/min		L/min		L/min				L/min		L		L
00:00	Rest
00:04	0.8				0.3		0.25		0.83		10		0.751
00:09	1		75		0.36		0.28		0.79		10		0.738		1.475
00:13	0.3		75		0.12		0.09		0.75		7		0.493		1.056
00:18	0.3		76		0.1		0.07		0.68		4		0.286		0.729
00:20	3.8		82		1.43		1		0.7		34		1.667		1.284
00:25	2		81		0.75		0.58		0.77		20		1.416		1.781
00:28	2.1		81		0.79		0.59		0.75		20		1.068		0.747
00:30	1.8		80		0.69		0.47		0.68		18		0.607		0.469
00:32	2.4		80		0.9		0.63		0.7		25		0.839		0.958
00:34	3		85		1.12		0.84		0.76		31		1.27		1.273
00:37	2.8		85		1.03		0.86		0.83		37		1.508		1.809
00:40	1.5		89		0.56		0.49		0.88		23		1.028		1.331
00:42	1.4		89		0.51		0.44		0.86		21		0.808		0.764
00:45	0.8		86		0.31		0.26		0.86		13		0.678		0.718
00:48	1.3		86		0.5		0.41		0.82		17		0.766		0.488
00:50	0.8		78		0.32		0.26		0.81		13		0.559		0.768
00:53	1.5		78		0.55		0.45		0.82		19		0.869		0.858
00:55	3.5		74		1.3		1.06		0.82		39		1.371		0.974
00:58	2.3		74		0.85		0.69		0.81		27		1.081		0.853
01:00	1.9		72		0.71		0.59		0.84		25		1.018		1.163
01:02	1.8		72		0.67		0.55		0.82		22		0.847		0.724
01:04	1.5		73		0.56		0.45		0.81		20		0.624		0.676
01:04	Test
01:06	1.1		73		0.4		0.32		0.8		15		0.584		0.558
01:09	1.1		73		0.41		0.33		0.81		15		0.563		0.693
01:11	1.3		73		0.49		0.4		0.81		17		0.596		0.701
01:13	2.5		73		0.94		0.74		0.79		29		0.877		0.772
01:15	1.9		75		0.72		0.59		0.82		26		0.781		0.943
01:16	2.4		75		0.92		0.75		0.82		30		0.968		0.898
01:18	2.3		75		0.84		0.71		0.84		30		0.97		1.054
01:20	2		77		0.75		0.64		0.86		28		0.987		1.171
01:22	2		77		0.76		0.66		0.87		29		0.885		0.852
01:26	1		81		0.37		0.32		0.87		14		0.964		1.133
01:29	1.7		81		0.65		0.51		0.79		18		0.744		0.742
01:31	2.5		83		0.93		0.7		0.76		27		0.861		0.612
01:32	3.1		83		1.16		0.87		0.75		33		0.896		0.903
01:35	2.2		88		0.82		0.63		0.77		24		1.167		1.134
01:37	3.6		88		1.36		1.07		0.79		39		1.204		1.331
01:39	3		88		1.13		0.93		0.82		38		1.103		1.21
01:42	1.6		90		0.62		0.52		0.85		21		1.139		1.108
01:45	2		89		0.77		0.63		0.82		24		1.119		1.423
01:46	3.2		89		1.2		0.98		0.82		38		1.099		0.968
01:48	2.4		89		0.89		0.7		0.79		29		0.774		0.755
01:50	3.1		88		1.15		0.95		0.82		37		1.178		1.167
01:52	2.1		88		0.78		0.64		0.83		30		0.835		1.191
01:53	2.7		88		1.01		0.84		0.83		35		0.904		0.867
01:55	2.9		87		1.08		0.88		0.82		35		1.045		0.944
01:57	2.2		87		0.84		0.67		0.8		27		0.901		0.916
01:59	1.9		87		0.73		0.57		0.78		25		0.711		0.802
02:00	2.5		86		0.94		0.72		0.76		28		0.784		0.678
02:02	2.8		86		1.04		0.78		0.75		30		0.97		1.009
02:04	3.1		86		1.14		0.86		0.76		33		0.967		1.146
02:06	3.5		87		1.3		0.99		0.76		37		1.071		1.167
02:08	3.5		87		1.3		1.02		0.78		40		1.233		1.324
02:10	3		88		1.12		0.88		0.79		35		1.123		1.214
02:12	3		88		1.13		0.9		0.79		35		1.112		1.19
02:13	2.8		88		1.06		0.83		0.78		33		0.945		1.096
02:15	3.2		92		1.21		0.94		0.78		38		0.991		1.009
02:17	3.5		92		1.32		1.03		0.78		38		1.113		1.18
02:18	2.5		92		0.93		0.73		0.79		33		0.874		1.329
02:21	3.2		96		1.18		0.92		0.78		34		1.365		1.157
02:22	4.7		96		1.76		1.35		0.77		49		1.306		1.185
02:24	3		96		1.11		0.84		0.76		34		0.899		0.961
02:25	4.1		98		1.55		1.18		0.76		44		1.187		1.167
02:27	3.7		98		1.37		1.04		0.76		39		1.114		1.146
02:29	3.7		98		1.37		1.06		0.78		40		1.171		1.291
02:31	2.9		97		1.1		0.85		0.77		32		1.187		1.247
02:33	4.1		97		1.52		1.17		0.77		44		1.23		1.166
02:34	3.2		96		1.2		0.92		0.77		37		0.939		1.103
02:36	3.8		96		1.41		1.08		0.77		40		1.04		0.991
02:37	3.5		96		1.29		0.99		0.76		39		1.072		1.149
02:39	3.4		96		1.25		0.97		0.77		38		0.978		1.17
02:41	4.1		96		1.55		1.22		0.79		45		1.334		1.347
02:43	3.5		96		1.32		1.03		0.79		40		1.196		1.301
02:44	3.6		98		1.33		1.05		0.79		41		1.121		1.145
02:46	3.9		98		1.47		1.15		0.79		44		1.098		1.146
02:47	3.5		98		1.3		1.01		0.78		39		0.972		1.078
02:49	4		98		1.51		1.18		0.78		44		1.111		1.11
02:50	2.1		99		0.78		0.61		0.78		29		0.735		1.284
02:52	3.6		99		1.34		1		0.75		35		1.14		0.781
02:54	4.9		99		1.84		1.38		0.75		49		1.389		1.382
02:56	4.1		100		1.54		1.17		0.76		43		1.197		1.291
02:59	3.4		100		1.28		1.05		0.82		35		2.021		2.477
03:01	4		100		1.49		1.15		0.77		42		1.045		0.927
03:02	3		100		1.13		0.83		0.74		32		0.806		0.845
03:04	3.6		100		1.36		0.99		0.73		36		1.065		1.027
03:06	4.6		100		1.72		1.28		0.75		45		1.501		1.6
03:08	4.9		100		1.82		1.39		0.76		48		1.554		1.655
03:10	4.8		100		1.8		1.38		0.77		49		1.436		1.518
03:11	4.5		100		1.69		1.31		0.77		47		1.341		1.418
03:13	3.8		100		1.42		1.11		0.78		41		1.144		1.276
03:15	4.2		101		1.59		1.24		0.78		44		1.318		1.357
03:16	4		101		1.49		1.16		0.78		41		1.123		1.313
03:20	2.4		104		0.88		0.66		0.75		22		1.145		1.421
03:21	5.7		104		2.12		1.54		0.73		49		1.49		1.373
03:24	4.4		104		1.63		1.21		0.74		42		1.52		1.687
03:25	6.1		106		2.28		1.76		0.77		62		1.755		1.842
03:27	5.2		106		1.94		1.53		0.79		56		1.575		1.63
03:29	5		106		1.87		1.5		0.8		55		1.455		1.501
03:30	4.6		105		1.71		1.39		0.81		52		1.231		1.324
03:32	4.2		105		1.59		1.31		0.83		48		1.202		1.244
03:33	4.3		105		1.61		1.3		0.81		47		1.168		1.183
03:35	4.3		103		1.61		1.31		0.81		48		1.299		1.405
03:36	4.2		103		1.56		1.26		0.81		46		1.229		1.414
03:38	4.8		103		1.81		1.47		0.81		53		1.438		1.37
03:40	4.6		103		1.72		1.4		0.82		50		1.416		1.541
03:41	4.3		103		1.62		1.32		0.82		48		1.366		1.517
03:43	4.6		103		1.73		1.44		0.83		52		1.409		1.513
03:45	4.2		103		1.57		1.3		0.83		47		1.43		1.45
03:46	4.5		103		1.67		1.4		0.84		51		1.346		1.485
03:48	4.3		103		1.6		1.34		0.84		49		1.255		1.361
03:49	4.5		103		1.67		1.4		0.84		50		1.28		1.322
03:51	4.1		103		1.52		1.26		0.83		45		1.222		1.367
03:53	4.2		103		1.57		1.3		0.83		46		1.353		1.405
03:55	4.1		101		1.52		1.24		0.82		44		1.316		1.414
03:57	4.3		101		1.61		1.3		0.81		43		1.404		1.406
03:58	4.8		101		1.78		1.42		0.8		48		1.386		1.468
04:00	4.5		102		1.67		1.35		0.81		46		1.328		1.529
04:02	5.1		102		1.9		1.56		0.82		55		1.644		1.768
04:04	4.7		102		1.75		1.48		0.84		53		1.563		1.687
04:05	4.6		103		1.73		1.45		0.84		51		1.416		1.376
04:07	4.4		103		1.66		1.4		0.84		50		1.312		1.494
04:09	4		103		1.48		1.25		0.84		46		1.272		1.404
04:10	4.6		103		1.73		1.45		0.84		53		1.324		1.383
04:12	4.8		103		1.8		1.52		0.84		54		1.413		1.394
04:13	4.8		103		1.81		1.53		0.84		53		1.493		1.548
04:15	4.5		105		1.69		1.43		0.85		50		1.364		1.611
04:17	3.3		105		1.23		1.02		0.83		35		1.211		1.457
04:19	4.7		105		1.75		1.42		0.81		47		1.369		1.428
04:20	5		105		1.87		1.53		0.82		53		1.347		1.338
04:22	4.5		105		1.67		1.39		0.84		50		1.449		1.691
04:24	4		105		1.51		1.26		0.83		44		1.441		1.606
04:26	4.6		104		1.73		1.43		0.83		50		1.464		1.515
04:28	4.7		104		1.76		1.46		0.83		49		1.523		1.49
04:30	4		104		1.51		1.25		0.83		44		1.406		1.553
04:31	4.9		104		1.82		1.51		0.83		52		1.459		1.569
04:33	3.9		104		1.46		1.23		0.84		44		1.433		1.634
04:35	5.1		103		1.9		1.6		0.84		56		1.542		1.502
04:37	5		103		1.86		1.55		0.83		53		1.441		1.416
04:39	3.2		103		1.19		0.97		0.82		30		1.463		1.707
04:41	5.5		103		2.07		1.7		0.82		56		1.668		1.725
04:43	4.5		103		1.69		1.37		0.81		47		1.318		1.405
04:45	4.9		105		1.85		1.52		0.83		53		1.581		1.712
04:46	5.2		105		1.95		1.62		0.83		56		1.464		1.598
04:48	4.7		105		1.77		1.52		0.86		54		1.581		1.707
04:50	5		105		1.89		1.63		0.86		58		1.556		1.572
04:51	4.7		105		1.76		1.53		0.87		55		1.404		1.539
04:53	4.7		105		1.78		1.57		0.88		57		1.385		1.527
04:54	5		106		1.87		1.64		0.88		57		1.454		1.492
04:56	4.7		106		1.77		1.58		0.89		56		1.61		1.723
04:58	4.4		106		1.66		1.47		0.88		52		1.342		1.44
04:59	4.6		106		1.71		1.49		0.87		54		1.377		1.456
05:01	4.3		107		1.62		1.42		0.88		52		1.255		1.398
05:02	4.6		107		1.72		1.48		0.86		51		1.315		1.363
05:04	4.7		107		1.77		1.54		0.87		53		1.351		1.485
05:05	5.1		108		1.9		1.67		0.88		58		1.598		1.669
05:07	4.8		108		1.79		1.57		0.87		54		1.599		1.633
05:09	4.5		108		1.69		1.48		0.87		51		1.47		1.635
05:10	4.7		108		1.74		1.53		0.88		53		1.395		1.443
05:12	4.6		108		1.71		1.48		0.86		52		1.411		1.471
05:14	4.7		108		1.78		1.54		0.87		52		1.533		1.585
05:16	4.4		107		1.65		1.44		0.87		51		1.487		1.682
05:17	4.5		107		1.69		1.48		0.88		51		1.497		1.624
05:19	4.6		108		1.73		1.49		0.86		48		1.613		1.592
05:21	4		108		1.5		1.28		0.86		43		1.302		1.632
05:23	4.9		108		1.82		1.56		0.86		54		1.508		1.584
05:24	5.1		110		1.89		1.61		0.85		56		1.534		1.563
05:26	4.3		110		1.62		1.39		0.86		49		1.463		1.673
05:28	4.5		110		1.67		1.42		0.85		51		1.321		1.398
05:30	4.6		110		1.73		1.47		0.85		49		1.507		1.583
05:31	5.2		110		1.94		1.64		0.85		56		1.57		1.616
05:33	4.9		110		1.83		1.55		0.85		53		1.512		1.702
05:36	5.4		110		2.03		1.94		0.95		70		3.857		3.927
05:38	3.8		110		1.41		1.26		0.9		45		1.574		1.799
05:40	3.7		110		1.38		1.16		0.84		43		1.028		1.131
05:41	4.5		110		1.67		1.38		0.82		48		1.111		1.1
05:43	4.8		110		1.8		1.48		0.82		50		1.37		1.517
05:44	5.2		110		1.95		1.61		0.83		56		1.474		1.64
05:46	5		110		1.86		1.57		0.84		55		1.631		1.845
05:50	3.6		111		1.33		1.09		0.82		31		1.703		1.91
05:51	6.4		111		2.39		1.95		0.81		60		1.715		1.692
05:53	6.1		111		2.27		1.85		0.82		59		1.604		1.613
05:55	5.9		112		2.21		1.84		0.83		60		1.711		1.88
05:56	5.8		112		2.17		1.88		0.87		66		1.803		1.896
05:58	5.1		112		1.92		1.7		0.89		59		1.577		1.805
05:59	4.9		112		1.83		1.61		0.88		57		1.499		1.563
06:01	4.9		112		1.82		1.59		0.87		55		1.41		1.481
06:03	5.1		112		1.92		1.7		0.88		57		1.492		1.681
06:04	4.8		112		1.8		1.58		0.88		54		1.324		1.5
06:06	5.7		111		2.12		1.87		0.88		63		1.591		1.676
06:07	5.9		111		2.21		1.98		0.9		68		1.794		1.814
06:09	5.6		111		2.1		1.9		0.9		65		1.67		1.737
06:10	5.2		113		1.93		1.76		0.91		61		1.521		1.696
06:12	5.1		113		1.92		1.74		0.91		59		1.545		1.627
06:13	4.8		113		1.8		1.62		0.9		55		1.478		1.606
06:15	5.4		114		2.03		1.83		0.9		62		1.675		1.697
06:17	5.4		114		2.04		1.85		0.91		61		1.58		1.673
06:18	5.2		114		1.96		1.77		0.9		59		1.574		1.678
06:20	5.1		114		1.92		1.73		0.9		58		1.692		1.791
06:22	4.8		114		1.81		1.62		0.9		54		1.664		1.845
06:23	5.3		114		1.97		1.75		0.89		56		1.611		1.681
06:25	5.4		114		2.01		1.79		0.89		62		1.514		1.612
06:27	5.6		114		2.09		1.86		0.89		63		1.709		1.727
06:28	5.3		114		1.98		1.77		0.9		60		1.689		1.883
06:30	5.6		114		2.08		1.89		0.91		65		1.675		1.801
06:31	5.3		114		2		1.82		0.91		62		1.701		1.772
06:33	5.2		114		1.95		1.77		0.91		60		1.509		1.582
06:34	5		114		1.86		1.71		0.92		62		1.394		1.632
06:36	5.2		114		1.94		1.76		0.91		60		1.45		1.501
06:37	5.2		114		1.95		1.78		0.91		60		1.613		1.792
06:39	5.1		114		1.91		1.71		0.9		57		1.51		1.561
06:41	5		113		1.86		1.68		0.91		56		1.524		1.806
06:44	3.8		113		1.42		1.24		0.87		33		1.778		2.071
06:45	5.7		113		2.13		1.82		0.85		59		1.603		1.607
06:47	6		113		2.26		1.9		0.84		59		1.69		1.652
06:49	6		115		2.25		1.95		0.87		63		1.835		2.111
06:51	6.1		115		2.29		2.06		0.9		69		1.957		2.151
06:52	5.6		115		2.1		1.93		0.92		66		1.906		2.001
06:54	5.4		114		2.02		1.87		0.92		63		1.754		1.927
06:56	5.1		114		1.91		1.75		0.92		59		1.667		1.716
06:57	5.5		114		2.05		1.87		0.91		62		1.772		1.766
06:59	5		113		1.89		1.72		0.91		57		1.846		1.93
07:01	5.1		113		1.93		1.78		0.92		60		1.821		1.963
07:03	5.3		113		1.98		1.81		0.92		60		1.775		1.98
07:05	5.5		113		2.07		1.91		0.93		65		1.772		1.821
07:06	5.2		113		1.95		1.79		0.92		59		1.648		1.726
07:08	5.6		113		2.1		1.93		0.92		64		1.729		1.818
07:09	5.6		114		2.09		1.93		0.93		65		1.723		1.871
07:11	5.5		114		2.05		1.92		0.94		67		1.908		2.012
07:13	5.4		114		2.01		1.87		0.93		65		1.636		1.766
07:14	5.2		115		1.95		1.81		0.92		62		1.662		1.719
07:16	5.2		115		1.94		1.78		0.92		60		1.633		1.861
07:18	5.5		115		2.05		1.9		0.93		66		1.786		1.858
07:19	5.8		116		2.16		2		0.93		67		1.906		1.945
07:22	3.7		116		1.39		1.22		0.88		33		1.823		1.939
07:24	5.3		118		1.98		1.71		0.86		52		1.747		1.978
07:26	6.5		118		2.44		2.12		0.87		68		1.916		1.975
07:28	5.9		118		2.21		2		0.9		67		2.064		2.277
07:30	6		120		2.24		2.02		0.91		67		1.986		2.021
07:31	6.1		120		2.27		2.07		0.91		70		1.873		1.978
07:33	5.6		120		2.11		1.96		0.93		68		1.783		1.952
07:35	5.7		121		2.13		1.99		0.93		67		1.879		1.96
07:36	6		121		2.24		2.06		0.92		69		1.908		1.905
07:38	5.9		121		2.2		2.03		0.92		70		1.762		1.84
07:39	5.5		121		2.07		1.89		0.92		65		1.704		1.84
07:41	5.4		121		2.03		1.88		0.92		64		1.689		1.897
07:43	6		121		2.25		2.11		0.94		71		2.15		2.168
07:45	5.7		121		2.15		1.99		0.93		65		1.873		2.018
07:46	5.6		121		2.09		1.92		0.92		64		1.739		1.861
07:48	5.5		121		2.04		1.88		0.92		66		1.742		1.83
07:49	6		121		2.24		2.07		0.92		70		1.762		1.927
07:51	5.8		121		2.17		2.04		0.94		69		1.96		2.021
07:53	6.1		121		2.27		2.14		0.94		73		1.903		1.997
07:54	5.7		121		2.14		2.04		0.95		70		1.86		1.997
07:56	5.8		121		2.18		2.07		0.95		71		1.898		1.992
07:57	5.6		121		2.11		2.04		0.96		72		1.842		2.072
07:59	6.1		121		2.27		2.21		0.97		77		1.866		1.872
08:00	5.7		121		2.15		2.08		0.97		72		1.768		1.932
08:02	5		121		1.87		1.79		0.96		56		1.838		2.01
08:04	5.6		122		2.11		2.01		0.95		67		1.809		1.975
08:05	6.1		122		2.3		2.16		0.94		69		1.876		1.83
08:07	5.4		122		2.02		1.88		0.93		61		1.724		2.001
08:09	5.8		122		2.18		2.03		0.93		64		1.977		2.044
08:11	5.8		122		2.17		2.01		0.93		62		2.138		2.14
08:13	5		122		1.86		1.74		0.94		56		1.926		2.366
08:15	5.8		121		2.16		1.99		0.92		64		2.131		2.231
08:17	6.6		121		2.47		2.27		0.92		72		2.158		2.167
08:19	5.7		121		2.15		1.98		0.92		64		1.796		2.058
08:20	6.8		122		2.53		2.36		0.93		76		2.158		2.192
08:22	5.7		122		2.12		1.97		0.93		64		1.785		1.956
08:24	6		122		2.26		2.13		0.94		70		1.906		2.048
08:25	6		123		2.25		2.13		0.95		71		1.939		2.021
08:27	5.8		123		2.16		2.03		0.94		69		1.858		2.054
08:29	6.3		123		2.36		2.26		0.96		74		2.219		2.238
08:30	5.9		125		2.22		2.11		0.95		72		1.883		2.012
08:32	6.2		125		2.32		2.23		0.96		71		2.154		2.202
08:34	5.5		125		2.05		1.95		0.95		67		1.751		2.029
08:36	6.3		125		2.37		2.42		1.02		81		3.676		3.749
08:39	3		125		1.14		1.01		0.89		28		1.444		1.794
08:41	7.6		125		2.84		2.49		0.88		73		1.996		1.959
08:43	7.3		125		2.73		2.45		0.9		75		2.174		2.22
08:45	6.7		126		2.49		2.27		0.91		73		2.154		2.286
08:46	6.2		126		2.33		2.18		0.93		74		2.035		2.267
08:48	6.8		126		2.54		2.42		0.95		82		2.081		2.116
08:49	6.5		126		2.45		2.37		0.97		81		2.049		2.101
08:51	5.3		126		1.98		1.9		0.96		66		1.537		1.717
08:52	2.7		126		1		0.91		0.91		34		0.679		0.778
08:54	3.5		125		1.29		1.11		0.86		36		1.123		1.413
08:55	7		125		2.61		2.34		0.9		77		2.105		2.285
08:58	3		125		1.1		1.01		0.91		36		1.374		2.215
09:00	8.9		125		3.33		2.92		0.87		82		2.703		1.668
09:01	6.9		125		2.58		2.26		0.88		67		1.877		1.851
09:03	7.2		125		2.71		2.42		0.89		79		1.773		1.949
09:05	5.1		123		1.92		1.75		0.91		48		2.098		2.264
09:07	7.7		123		2.88		2.65		0.92		83		2.262		2.248
09:08	6.5		123		2.43		2.24		0.92		74		1.95		2.089
09:10	7		123		2.62		2.5		0.95		88		2.162		2.242
09:12	4.8		123		1.81		1.75		0.97		58		2.209		2.112
09:14	5.2		123		1.96		1.83		0.93		65		1.629		2.302
09:16	6.9		123		2.58		2.35		0.91		70		2.756		2.511
09:18	7.6		123		2.83		2.68		0.95		90		2.229		2.375
09:19	6.7		123		2.52		2.48		0.98		87		2.294		2.511
09:21	6.5		123		2.44		2.41		0.99		81		2.334		2.33
09:22	6.1		123		2.3		2.27		0.98		78		2.027		2.069
09:24	5.8		123		2.18		2.14		0.98		75		1.841		2.007
09:25	5.6		125		2.09		2.06		0.99		70		1.82		2.098
09:27	6.3		125		2.37		2.33		0.98		76		2.16		2.154
09:29	6		125		2.26		2.19		0.97		74		1.91		2.12
09:30	6.4		126		2.41		2.34		0.97		77		1.873		2.047
09:33	4.6		126		1.74		1.63		0.94		44		2.28		2.434
09:35	7		127		2.61		2.41		0.92		74		2.018		2.154
09:36	7.7		127		2.89		2.71		0.94		86		2.174		2.205
09:38	7.3		127		2.75		2.65		0.96		89		2.399		2.615
09:40	7.1		129		2.66		2.63		0.99		88		2.413		2.543
09:41	6.5		129		2.45		2.46		1		87		2.28		2.457
09:43	6.6		129		2.46		2.48		1.01		88		2.044		2.18
09:44	6.6		130		2.46		2.49		1.01		87		2.086		2.193
09:46	6.6		130		2.47		2.51		1.02		88		2.108		2.192
09:47	7		130		2.62		2.68		1.02		92		2.247		2.28
09:48	6.2		130		2.31		2.37		1.03		83		2.05		2.31
09:50	6.8		134		2.56		2.63		1.03		88		2.227		2.31
09:52	6.7		134		2.51		2.57		1.02		88		2.297		2.336
09:53	6.6		134		2.46		2.49		1.01		83		2.112		2.233
09:55	6.7		136		2.49		2.52		1.01		85		2.169		2.258
09:56	6.8		136		2.55		2.62		1.03		89		2.24		2.433
09:58	6.5		136		2.44		2.49		1.02		85		2.241		2.381
09:59	6.6		137		2.46		2.48		1.01		82		2.154		2.225
10:01	6.3		137		2.35		2.35		1		78		1.881		2.109
10:02	6.7		137		2.52		2.55		1.01		84		2.112		2.222
10:04	6.6		137		2.47		2.48		1		82		2.1		2.29
10:05	6.9		137		2.58		2.58		1		83		2.154		2.119
10:07	6.8		137		2.55		2.52		0.99		83		2.094		2.137
10:09	6.8		137		2.53		2.53		1		84		2.381		2.575
10:10	6.9		137		2.59		2.63		1.01		90		2.184		2.441
10:11	7.2		137		2.68		2.73		1.02		92		2.207		2.267
10:13	6.9		137		2.58		2.64		1.02		91		2.27		2.37
10:14	6.5		137		2.43		2.48		1.02		85		2.047		2.259
10:16	6.9		137		2.59		2.65		1.03		92		2.131		2.194
10:17	6.6		137		2.49		2.54		1.02		88		2.098		2.217
10:19	6.5		137		2.44		2.49		1.02		87		2.042		2.195
10:20	6.7		139		2.52		2.57		1.02		88		2.104		2.222
10:21	7.3		139		2.74		2.81		1.02		96		2.281		2.355
10:23	6.5		139		2.42		2.5		1.03		86		2.154		2.405
10:25	6.7		139		2.51		2.58		1.03		86		2.332		2.309
10:26	6.4		139		2.4		2.46		1.02		86		2.01		2.313
10:27	6.7		139		2.5		2.56		1.02		86		2.042		2.11
10:29	6.1		139		2.28		2.29		1		74		2.006		2.267
10:31	7.5		139		2.81		2.86		1.02		93		2.413		2.423
10:32	6.9		139		2.6		2.63		1.01		87		2.445		2.584
10:34	6.9		139		2.58		2.63		1.02		89		2.272		2.551
10:35	7.2		139		2.69		2.76		1.03		96		2.268		2.339
10:37	7.3		139		2.73		2.83		1.04		96		2.315		2.366
10:38	6.8		139		2.56		2.65		1.04		91		2.249		2.398
10:40	6.8		137		2.53		2.63		1.04		92		2.196		2.356
10:41	7		137		2.6		2.71		1.04		93		2.333		2.369
10:43	6.8		137		2.55		2.64		1.03		90		2.352		2.565
10:44	6.9		139		2.57		2.69		1.05		92		2.32		2.444
10:47	6		139		2.23		2.38		1.07		75		3.749		3.931
10:49	5.2		139		1.96		1.94		0.99		61		1.953		2.331
10:52	4.8		139		1.78		1.63		0.92		43		1.915		2.096
10:54	7.6		137		2.84		2.56		0.9		66		2.265		2.388
10:56	8.1		137		3.02		2.82		0.93		88		2.538		2.848
10:58	7.3		137		2.74		2.58		0.94		77		2.624		2.663
10:59	7.7		137		2.87		2.74		0.96		86		2.359		2.503
11:01	7.6		137		2.84		2.75		0.97		90		2.207		2.34
11:02	7.5		137		2.82		2.8		0.99		95		2.196		2.456
11:04	7.6		137		2.85		2.9		1.02		97		2.426		2.504
11:05	6.9		137		2.59		2.63		1.01		89		2.289		2.448
11:07	7.4		137		2.76		2.83		1.03		95		2.307		2.355
11:08	7.1		137		2.65		2.73		1.03		93		2.295		2.415
11:09	6.9		139		2.59		2.67		1.03		92		2.189		2.418
11:11	7.2		139		2.68		2.77		1.03		91		2.116		2.246
11:12	6.8		139		2.54		2.63		1.04		87		2.238		2.408
11:14	7.5		139		2.81		2.87		1.02		93		2.344		2.36
11:15	7.6		139		2.85		2.93		1.03		100		2.398		2.532
11:17	7.3		139		2.74		2.87		1.05		99		2.466		2.64
11:18	7.3		139		2.74		2.89		1.05		102		2.31		2.463
11:20	6.8		139		2.54		2.67		1.05		95		2.352		2.454
11:21	6.9		139		2.59		2.71		1.05		95		2.168		2.38
11:23	7.5		139		2.8		2.95		1.05		101		2.419		2.412
11:24	7.1		139		2.65		2.81		1.06		98		2.378		2.596
11:25	7.5		141		2.79		2.94		1.06		101		2.398		2.462
11:27	7.1		141		2.66		2.83		1.07		98		2.374		2.553
11:28	7.1		141		2.66		2.8		1.05		97		2.13		2.338
11:30	7.2		144		2.71		2.85		1.05		98		2.18		2.317
11:31	7.6		144		2.86		3.04		1.06		104		2.476		2.519
11:32	7.2		144		2.68		2.85		1.06		99		2.351		2.621
11:34	7.6		146		2.85		3.06		1.07		106		2.438		2.487
11:35	6.8		146		2.53		2.7		1.07		94		2.205		2.436
11:37	7.4		146		2.77		2.93		1.06		97		2.435		2.44
11:38	7.1		146		2.66		2.82		1.06		97		2.323		2.618
11:40	7.7		146		2.87		3.03		1.06		103		2.582		2.552
11:41	7.1		146		2.65		2.77		1.04		91		2.433		2.667
11:43	7.6		146		2.85		3		1.05		100		2.392		2.57
11:44	7.4		148		2.76		2.9		1.05		97		2.333		2.492
11:46	7.1		148		2.67		2.81		1.05		91		2.584		2.765
11:47	7.8		148		2.92		3.07		1.05		101		2.553		2.646
11:49	7.7		148		2.88		3.03		1.05		102		2.454		2.682
11:50	7.8		148		2.92		3.08		1.05		105		2.519		2.583
11:52	7.8		148		2.91		3.12		1.07		105		2.63		2.682
11:53	7.5		148		2.82		3.01		1.07		103		2.589		2.816
11:55	7.5		150		2.79		2.98		1.07		102		2.559		2.775
11:56	7.9		150		2.95		3.19		1.08		109		2.587		2.623
11:58	7.5		150		2.82		3.03		1.07		105		2.476		2.711
11:59	7.5		150		2.81		3.04		1.08		103		2.399		2.493
12:01	6.4		150		2.4		2.55		1.06		79		2.263		2.624
12:02	7.9		150		2.95		3.13		1.06		106		2.353		2.477
12:04	6.1		151		2.28		2.35		1.03		64		2.427		2.572
12:06	9.3		151		3.46		3.61		1.04		119		2.689		2.872
12:07	8.6		151		3.23		3.43		1.06		120		2.574		2.649
12:08	7.7		151		2.87		3.08		1.07		108		2.484		2.691
12:10	8.1		151		3.03		3.27		1.08		111		2.67		2.707
12:11	7.5		151		2.82		3.07		1.09		109		2.468		2.744
12:13	7.9		151		2.95		3.22		1.09		112		2.639		2.748
12:14	8		151		2.99		3.3		1.1		118		2.567		2.719
12:15	8		153		2.98		3.28		1.1		116		2.543		2.645
12:16	8		153		3.01		3.34		1.11		119		2.562		2.603
12:18	7.8		153		2.9		3.23		1.12		114		2.802		2.914
12:19	7.5		153		2.8		3.1		1.11		109		2.54		2.82
12:21	7.8		153		2.94		3.24		1.1		114		2.669		2.788
12:22	7.8		153		2.92		3.25		1.11		117		2.506		2.71
12:23	8.1		153		3.03		3.39		1.12		119		2.666		2.666
12:25	7.5		153		2.81		3.1		1.1		111		2.519		2.767
12:26	8.1		153		3.03		3.36		1.11		116		2.8		2.852
12:27	7.2		153		2.68		2.99		1.11		108		2.385		2.753
12:29	8.1		155		3.02		3.38		1.12		118		2.601		2.673
12:30	7.5		155		2.81		3.13		1.11		111		2.514		2.741
12:31	7.9		155		2.96		3.28		1.11		115		2.381		2.545
12:33	8.1		155		3.03		3.36		1.11		117		2.595		2.702
12:34	6.9		155		2.57		2.79		1.09		83		2.457		2.712
12:36	8		155		2.98		3.22		1.08		108		2.567		2.656
12:38	5.8		155		2.17		2.24		1.03		61		2.403		2.714
12:40	9.6		155		3.59		3.75		1.04		122		2.684		2.811
12:41	9		155		3.37		3.58		1.06		123		2.671		2.835
12:42	8.7		155		3.25		3.55		1.09		124		2.823		3.018
12:44	8.3		155		3.12		3.44		1.1		122		2.576		2.667
12:45	7.9		155		2.95		3.27		1.11		118		2.661		2.84
12:46	8.1		155		3.03		3.36		1.11		116		2.65		2.784
12:48	7.9		155		2.94		3.28		1.12		118		2.616		2.801
12:49	8.4		155		3.13		3.47		1.11		122		2.761		2.886
12:50	8.1		155		3.03		3.38		1.11		120		2.55		2.697
12:52	7.4		155		2.76		3.13		1.14		105		3.554		3.892
12:54	7.8		155		2.92		3.17		1.08		108		2.362		2.511
12:55	8.2		157		3.06		3.33		1.09		113		2.445		2.637
12:56	8.4		157		3.14		3.45		1.1		118		2.751		2.904
12:58	8.3		157		3.1		3.41		1.1		116		2.669		2.879
12:59	8.2		157		3.08		3.37		1.09		112		2.6		2.679
13:00	8.3		157		3.12		3.4		1.09		114		2.649		2.817
13:02	8.2		157		3.06		3.36		1.1		117		2.688		2.941
13:03	8.3		157		3.11		3.41		1.1		117		2.643		2.776
13:04	8.2		160		3.07		3.39		1.1		119		2.469		2.692
13:06	8.2		160		3.07		3.42		1.11		119		2.661		2.807
13:07	8.4		160		3.14		3.51		1.12		123		2.677		2.809
13:08	8.3		160		3.09		3.43		1.11		120		2.53		2.772
13:10	8.2		160		3.05		3.44		1.13		123		2.58		2.754
13:11	8.5		160		3.17		3.56		1.12		125		2.668		2.792
13:12	8.3		160		3.11		3.48		1.12		121		2.518		2.625
13:14	8.6		160		3.22		3.57		1.11		125		2.952		2.962
13:15	8.2		162		3.05		3.42		1.12		122		2.79		3.086
13:16	8.4		162		3.13		3.51		1.12		126		2.682		2.837
13:17	7.8		162		2.9		3.25		1.12		118		2.353		2.65
13:19	8.9		162		3.33		3.72		1.12		128		2.844		2.74
13:20	8.1		162		3.02		3.37		1.12		120		2.602		2.989
13:21	8.5		162		3.16		3.55		1.12		124		2.736		2.827
13:23	8.3		162		3.09		3.48		1.13		127		2.732		2.944
13:25	6		164		2.25		2.42		1.07		69		2.542		2.782
13:26	9.6		164		3.58		3.9		1.09		129		2.795		2.883
13:27	9		164		3.37		3.67		1.09		126		2.867		2.933
13:29	8.3		164		3.12		3.44		1.1		126		2.753		3.115
13:30	8.6		164		3.21		3.6		1.12		130		2.906		2.938
13:31	8.3		164		3.1		3.51		1.13		130		2.876		3.101
13:33	8.3		164		3.11		3.54		1.14		136		2.807		3.097
13:34	8.2		166		3.08		3.56		1.16		139		2.656		2.802
13:35	8.4		166		3.13		3.56		1.14		128		2.931		2.904
13:36	8.3		166		3.09		3.54		1.15		131		2.708		2.95
13:38	8.2		166		3.05		3.43		1.13		123		2.823		3.027
13:39	8.5		166		3.17		3.61		1.14		132		2.899		3.046
13:40	8.5		166		3.19		3.65		1.15		133		2.697		2.865
13:42	8.4		166		3.15		3.59		1.14		129		2.665		2.757
13:43	7.9		166		2.95		3.38		1.15		115		3.522		3.835
13:45	8.6		166		3.23		3.64		1.13		128		2.451		2.589
13:46	8.3		166		3.11		3.53		1.13		129		2.549		2.793
13:47	8.9		166		3.33		3.79		1.14		137		2.8		2.843
13:48	8.4		166		3.14		3.61		1.15		133		2.676		2.969
13:50	8.8		169		3.29		3.74		1.13		130		2.982		2.97
13:51	8.6		169		3.2		3.66		1.14		131		2.857		3.119
13:53	6.9		169		2.58		2.88		1.11		89		2.409		2.841
13:54	9.3		169		3.5		3.94		1.13		138		2.801		2.814
13:55	8.6		169		3.23		3.67		1.14		132		2.97		3.192
13:56	8.6		169		3.23		3.69		1.14		134		2.826		3.068
13:58	8.7		169		3.26		3.79		1.16		140		2.731		2.863
13:59	8.5		169		3.18		3.71		1.17		139		2.807		2.949
14:00	8.4		169		3.12		3.65		1.17		138		2.767		3.046
14:01	8.4		169		3.16		3.72		1.18		142		2.692		2.81
14:02	8.8		169		3.28		3.83		1.17		140		2.984		2.934
14:04	8		169		3		3.5		1.16		134		2.567		2.989
14:05	8.8		171		3.28		3.83		1.17		140		2.723		2.708
14:06	8.5		171		3.19		3.72		1.17		137		2.835		3.002
14:07	8.7		171		3.26		3.79		1.16		139		2.779		2.9
14:08	8.4		171		3.14		3.69		1.18		137		2.732		3.001
14:10	8.6		171		3.23		3.78		1.17		133		3.112		3.122
14:11	8.5		171		3.17		3.68		1.16		128		3.091		3.24
14:12	8.6		171		3.23		3.71		1.15		134		2.854		3.072
14:14	8.5		171		3.2		3.7		1.16		135		2.828		2.984
14:15	8.7		171		3.27		3.82		1.17		137		2.908		3.043
14:16	8.7		171		3.25		3.77		1.16		141		3.036		3.22
14:17	8.2		171		3.07		3.62		1.18		134		2.68		2.92
14:19	8.6		171		3.21		3.78		1.18		139		2.946		3.128
14:21	7.8		171		2.92		3.38		1.16		112		3.698		3.781
14:22	8.5		171		3.19		3.61		1.13		126		2.805		2.985
14:23	8.5		171		3.19		3.62		1.14		126		2.84		3.027
14:25	8.7		173		3.24		3.69		1.14		134		2.733		2.97
14:26	8.7		173		3.26		3.77		1.15		136		3.006		3.088
14:27	8.9		173		3.32		3.83		1.15		140		2.865		3.012
14:28	8.1		173		3.03		3.51		1.16		127		2.575		2.88
14:30	9		173		3.36		3.91		1.16		141		3.024		3.046
14:31	8.6		173		3.23		3.74		1.16		130		2.969		3.132
14:32	8.4		173		3.14		3.66		1.17		133		2.659		2.92
14:33	8.6		173		3.22		3.75		1.16		142		2.833		3.007
14:35	8.9		173		3.33		3.9		1.17		149		2.924		3.118
14:36	8.9		173		3.34		3.94		1.18		144		3.027		3.127
14:37	8.2		173		3.08		3.65		1.19		143		2.714		3.01
14:38	8.7		173		3.26		3.88		1.19		143		3.193		3.203
14:40	8.1		173		3.01		3.6		1.2		141		2.585		2.971
14:41	5.9		173		2.2		2.49		1.13		75		2.441		2.572
14:43	10		173		3.76		4.26		1.13		146		2.792		2.8
14:44	9.3		176		3.49		4.02		1.15		149		2.773		2.963
14:45	9.4		176		3.5		4.1		1.17		154		2.976		3.052
14:46	9		176		3.38		3.96		1.17		147		2.988		3.187
14:47	8.6		176		3.23		3.79		1.17		143		2.687		2.871
14:48	8.8		176		3.28		3.91		1.19		151		2.847		2.971
14:49	8.4		176		3.13		3.79		1.21		151		2.736		2.929
14:51	8.3		176		3.11		3.72		1.2		144		2.646		2.839
14:52	9		176		3.38		4.01		1.18		149		3.275		3.177
14:53	8.7		176		3.24		3.85		1.19		146		2.954		3.143
14:54	8.7		176		3.25		3.86		1.19		146		2.878		3.084
14:55	8.7		176		3.25		3.87		1.19		144		2.84		2.998
14:57	8.8		176		3.29		3.95		1.2		149		3.367		3.467
14:58	8.6		176		3.21		3.84		1.2		147		2.841		3.058
14:59	8.6		179		3.21		3.85		1.2		147		2.827		3.006
15:00	8.4		179		3.13		3.76		1.2		144		2.693		2.879
15:01	8.9		179		3.33		4		1.2		152		2.897		3.046
15:03	8.6		179		3.22		3.86		1.2		147		2.837		2.94
15:04	8.8		179		3.28		3.94		1.2		152		2.967		3.1
15:05	8.5		179		3.17		3.82		1.21		151		2.815		3.08
15:06	8.6		179		3.22		3.84		1.19		148		3.061		3.134
15:07	8.7		179		3.24		3.92		1.21		157		2.913		3.137
15:08	8.4		179		3.15		3.81		1.21		147		2.993		3.134
15:10	8.2		179		3.06		3.69		1.2		149		2.705		2.902
15:11	8.4		179		3.16		3.83		1.21		155		2.848		2.923
15:12	8.5		179		3.17		3.83		1.21		149		2.654		2.905
15:13	8.7		179		3.25		3.87		1.19		148		2.994		3.065
15:14	8.9		179		3.32		3.96		1.19		160		2.879		3.125
15:15	8.8		179		3.28		3.94		1.2		157		2.852		2.913
15:17	8		179		3.01		3.54		1.18		127		3.603		3.676
15:18	8.5		179		3.2		3.78		1.18		145		2.678		2.97
15:18	Recovery
15:19	7.8		181		2.93		3.38		1.15		113		2.578		2.763
15:20	8.9		181		3.32		3.84		1.15		140		2.926		3.059
15:22	8.5		181		3.2		3.72		1.16		137		3.106		3.272
15:23	8.8		181		3.29		3.82		1.16		143		3.199		3.356
15:25	8.6		181		3.2		3.78		1.18		144		3.34		3.539
15:26	8.5		181		3.18		3.82		1.2		148		3.431		3.55
15:27	7.9		181		2.95		3.59		1.22		140		3.238		3.449
15:29	8		181		3		3.64		1.21		142		2.941		3.131
15:30	8.1		179		3.02		3.65		1.21		137		2.853		2.889
15:31	7.8		179		2.9		3.48		1.2		134		2.674		2.849
15:32	8		179		3.01		3.6		1.19		136		2.887		2.984
15:34	7.8		179		2.92		3.48		1.19		131		2.825		3.093
15:36	5.5		176		2.06		2.35		1.14		73		2.583		2.778
15:37	9.1		176		3.42		3.94		1.15		139		2.851		2.924
15:38	8.6		176		3.22		3.74		1.16		136		2.809		2.858
15:39	7.9		173		2.96		3.48		1.18		133		2.831		3.075
15:41	7.8		173		2.9		3.47		1.2		135		2.925		2.998
15:42	7.4		173		2.78		3.36		1.21		130		2.889		3.04
15:43	7.3		173		2.74		3.35		1.22		133		2.824		3.057
15:45	7.4		171		2.76		3.39		1.23		135		2.74		2.814
15:46	7.1		169		2.66		3.24		1.22		125		2.68		2.804
15:47	7.2		169		2.68		3.29		1.23		125		2.789		2.974
15:49	7		169		2.61		3.23		1.24		125		2.677		2.82
15:50	6.8		166		2.56		3.17		1.24		123		2.662		2.86
15:51	6.9		166		2.6		3.24		1.25		125		2.826		2.888
15:53	6.9		166		2.57		3.22		1.25		122		2.82		2.988
15:54	7		166		2.6		3.26		1.25		127		2.77		2.923
15:55	6.6		166		2.48		3.14		1.27		121		2.755		2.945
15:57	6.6		166		2.46		3.13		1.27		121		2.838		2.904
15:58	6.4		166		2.41		3.09		1.28		119		2.828		2.98
15:59	6.3		164		2.36		3.05		1.29		121		2.692		2.946
16:02	4.5		164		1.68		2.06		1.23		66		2.395		2.473
16:03	7.1		164		2.67		3.34		1.25		126		2.653		2.72
16:04	6.6		162		2.47		3.15		1.27		123		2.599		2.747
16:05	6.2		162		2.34		3.02		1.29		123		2.693		2.851
16:07	6.1		162		2.28		2.98		1.31		122		2.775		2.964
16:08	5.4		162		2.03		2.7		1.33		110		2.832		3.097
16:24			153
16:40			150
16:56			144
17:11			139
17:27			136
17:43			130
17:59			129
18:14			127
18:30			123
18:46			122
19:01			122
19:17			121
19:33			116
19:49			115
20:04			111
	6.22193	3.5885	132.45	795.101	2.32807	0.501781	2.38007	0.968547	0.985456	0.0206473	83.9018	1353.14	2.06501	0.437927	2.19018	0.479628
	METS						HR						VO2						VCO2						RER						VE						Vtex						Vtin						LABEL
	Rest		Test		Recovery		Rest		Test		Recovery		Rest		Test		Recovery		Rest		Test		Recovery		Rest		Test		Recovery		Rest		Test		Recovery		Rest		Test		Recovery		Rest		Test		Recovery
	MEDIA	VAR	MEDIA	VAR	MEDIA	VAR	MEDIA	VAR	MEDIA	VAR	MEDIA	VAR	MEDIA	VAR	MEDIA	VAR	MEDIA	VAR	MEDIA	VAR	MEDIA	VAR	MEDIA	VAR	MEDIA	VAR	MEDIA	VAR	MEDIA	VAR	MEDIA	VAR	MEDIA	VAR	MEDIA	VAR	MEDIA	VAR	MEDIA	VAR	MEDIA	VAR	MEDIA	VAR	MEDIA	VAR	MEDIA	VAR	BIN
	1.75455	0.897835	6.14653	3.67678	7.30811	1.08688	79.5714	30.4571	129.795	749.058	159.654	462.78	0.655909	0.124568	2.29977	0.514083	2.73568	0.151309	0.514091	0.0704444	2.31417	0.958395	3.32946	0.154789	0.790455	0.00349026	0.969099	0.0177958	1.22108	0.00233769	20.6818	86.0368	80.94	1293.56	126.568	270.308	0.922364	0.124563	2.01186	0.421785	2.83065	0.0443272	0.995143	0.143999	2.13516	0.462873	2.98276	0.0501052	1
	1.75455	0.897835	6.14653	3.67678	7.30811	1.08688	79.5714	30.4571	129.795	749.058	159.654	462.78	0.655909	0.124568	2.29977	0.514083	2.73568	0.151309	0.514091	0.0704444	2.31417	0.958395	3.32946	0.154789	0.790455	0.00349026	0.969099	0.0177958	1.22108	0.00233769	20.6818	86.0368	80.94	1293.56	126.568	270.308	0.922364	0.124563	2.01186	0.421785	2.83065	0.0443272	0.995143	0.143999	2.13516	0.462873	2.98276	0.0501052	1
[truncated: 1 more columns]
