# Supplementary material for: On the development of diagnostic support algorithms based on CPET biosignals data via machine learning and wavelets
Source: PeerJ journal article supplement (doi:10.7717/peerj-cs.2474), 2025-01-30
Supplement: raw_data.zip [file Subject18_BxB.xlsx]

## Sheet: Demographics
Gender:	female
Age:	61
Height (cm):	159
Weight (kg):	72.8
BMI:	29
Condition:	Metabolic Syndrome

## Sheet: Subject18_BxB
Time	METS		HR		V'O2		V'CO2		RER		V'E		VTex		VTin
min			1/min		L/min		L/min				L/min		L		L
00:00	Rest
03:06									0.78				0.328
03:08	2.4		89		0.62		0.5		0.81		18		0.641		0.466
03:10	3		93		0.77		0.69		0.89		28		1.23		1.411
03:15	1.4		88		0.36		0.35		0.96		14		0.981		0.878
03:19	1.4		85		0.36		0.39		1.06		16		1.305		1.461
03:22	1.6		85		0.42		0.4		0.97		14		0.686		0.291
03:24	0.3		85		0.07		0.07		0.91		8		0.179		0.521
03:27	1.4		85		0.36		0.37		1.03		15		0.736		0.982
03:31	1.2		86		0.31		0.33		1.08		13		0.893		0.938
03:35	0.7		83		0.18		0.19		1.07		9		0.56		0.649
03:37	1		83		0.24		0.26		1.05		12		0.559		0.626
03:40	0.9		82		0.22		0.23		1.03		11		0.46		0.489
03:40	Test
03:43	0.9		82		0.23		0.23		1.03		10		0.569		0.587
03:49	0.9		82		0.22		0.2		0.92		7		0.659		0.607
03:52	2		84		0.5		0.43		0.87		15		0.881		0.822
03:54	0.2		88		0.05		0.04		0.78		3		0.1		0.14
03:58	1.4		88		0.36		0.26		0.73		8		0.577		0.552
04:02	2		90		0.5		0.33		0.67		11		0.663		0.667
04:05	3.2		93		0.8		0.54		0.67		17		0.738		0.908
04:08	3.2		93		0.82		0.56		0.69		19		0.924		0.988
04:10	2.4		96		0.6		0.42		0.7		15		0.692		0.767
04:16	3.6		97		0.92		0.69		0.75		24		2.286		2.207
04:20	3.3		97		0.83		0.71		0.86		25		1.546		1.588
04:22	1.6		97		0.41		0.34		0.83		14		0.512		0.64
04:24	2		96		0.52		0.43		0.82		17		0.612		0.684
04:27	2.6		96		0.66		0.55		0.84		20		0.909		0.862
04:29	0.6		93		0.15		0.11		0.73		7		0.269		0.414
04:35	1		91		0.26		0.17		0.66		5		0.417		0.106
04:40	2.2		93		0.56		0.33		0.59		10		0.966		1.345
04:42	5.2		93		1.31		0.82		0.62		29		1.088		1.087
04:45	2.9		93		0.75		0.51		0.68		19		0.835		0.941
04:47	3.7		93		0.94		0.66		0.7		24		0.977		0.907
04:50	2.8		95		0.7		0.52		0.73		19		0.799		0.941
04:52	3		95		0.76		0.56		0.74		20		0.837		0.797
04:55	2.1		98		0.53		0.38		0.73		15		0.657		0.77
04:59	2.6		98		0.66		0.46		0.69		14		0.792		0.809
05:01	2.2		99		0.56		0.37		0.66		13		0.551		0.611
05:04	3.8		99		0.96		0.64		0.67		20		0.951		0.934
05:06	3		98		0.76		0.51		0.68		17		0.729		0.9
05:09	3		98		0.78		0.51		0.66		18		0.703		0.766
05:11	3.7		97		0.94		0.64		0.68		21		0.915		0.986
05:14	3.6		100		0.92		0.64		0.7		21		0.964		0.941
05:17	3.5		100		0.9		0.66		0.73		22		1.033		1.196
05:20	1.3		100		0.32		0.23		0.7		11		0.491		0.77
05:21	2.5		100		0.64		0.43		0.67		17		0.516		0.304
05:24	4		100		1.01		0.67		0.66		20		0.916		0.783
05:27	4		100		1.03		0.7		0.68		22		0.962		1.043
05:29	3.7		100		0.94		0.65		0.69		22		0.874		0.986
05:32	3.6		100		0.92		0.66		0.71		22		0.862		1.022
05:34	4.2		100		1.07		0.81		0.75		27		1.277		1.273
05:36	0.4		100		0.09		0.06		0.66		6		0.207		0.477
05:39	3.5		100		0.9		0.64		0.71		19		0.759		0.738
05:41	3.9		100		0.98		0.69		0.7		22		0.841		0.861
05:44	4.4		100		1.11		0.8		0.72		26		1.105		1.151
05:47	2.8		102		0.71		0.51		0.72		17		0.775		0.837
05:50	1.4		103		0.37		0.25		0.68		10		0.492		0.707
05:52	4.6		103		1.18		0.82		0.7		25		1.034		1.062
05:55	4.2		104		1.08		0.77		0.72		24		1.138		1.128
05:57	4.2		104		1.08		0.79		0.73		27		1.02		1.068
06:00	3.9		105		0.98		0.75		0.77		25		1.047		1.174
06:02	2.8		105		0.71		0.53		0.74		18		0.551		0.6
06:04	3.5		105		0.9		0.67		0.74		21		0.803		0.845
06:06	3.2		104		0.82		0.62		0.76		21		0.792		0.937
06:10	1.8		102		0.46		0.34		0.74		11		0.659		0.935
06:12	4.8		102		1.21		0.88		0.72		26		1.009		0.99
06:15	4.3		104		1.1		0.82		0.75		25		1.111		1.121
06:17	4.2		104		1.07		0.81		0.76		25		1.062		1.155
06:20	3.7		104		0.95		0.76		0.8		25		1.052		1.147
06:22	3.1		104		0.78		0.62		0.79		20		0.836		0.941
06:25	4.2		105		1.07		0.85		0.8		26		1.124		1.061
06:28	4.1		105		1.04		0.86		0.83		27		1.383		1.437
06:31	3.7		107		0.95		0.8		0.84		25		1.308		1.306
06:34	3.6		107		0.91		0.76		0.83		24		1.047		1.16
06:37	3.5		107		0.88		0.76		0.86		24		1.149		1.308
06:40	4		107		1.02		0.88		0.86		27		1.383		1.353
06:42	2.6		107		0.65		0.55		0.84		19		0.707		0.903
06:45	4.1		106		1.03		0.91		0.88		30		1.726		1.666
06:48	3.2		106		0.81		0.68		0.84		23		0.928		0.972
06:52	1.8		105		0.45		0.36		0.79		11		0.747		0.868
06:54	2.5		107		0.64		0.45		0.7		14		0.596		0.661
06:57	5.3		107		1.34		0.99		0.74		28		1.308		1.36
07:00	4.6		107		1.18		0.9		0.76		28		1.152		1.221
07:02	3.9		107		1		0.82		0.82		29		1.142		1.352
07:05	3.9		107		0.99		0.82		0.83		26		1.169		1.041
07:07	3.8		107		0.96		0.79		0.83		25		1.074		1.18
07:10	3.9		107		1		0.83		0.83		26		1.05		1.104
07:13	3.6		107		0.91		0.77		0.85		24		1.064		1.23
07:15	4		109		1.02		0.87		0.85		27		1.186		1.203
07:17	3.8		109		0.96		0.8		0.83		25		0.924		0.972
07:20	2.3		110		0.59		0.48		0.81		16		0.68		0.891
07:22	4.1		110		1.05		0.85		0.81		26		1.053		1.009
07:25	4.1		110		1.05		0.86		0.81		27		1.029		1.117
07:27	3.5		110		0.89		0.74		0.83		23		0.954		1.128
07:30	1.9		110		0.49		0.39		0.8		13		0.676		0.907
07:33	5.3		110		1.34		1.06		0.79		31		1.261		1.151
07:35	4.4		109		1.12		0.91		0.81		28		1.064		1.187
07:38	4.3		109		1.1		0.92		0.84		28		1.163		1.235
07:40	3.8		109		0.97		0.83		0.85		26		1.077		1.162
07:42	4		109		1.02		0.88		0.86		28		1.145		1.191
07:45	4		110		1.01		0.86		0.85		26		1.016		1.033
07:47	3.7		110		0.95		0.83		0.87		26		1.064		1.163
07:50	4.2		111		1.06		0.93		0.88		29		1.273		1.288
07:53	4.1		111		1.06		0.96		0.9		29		1.367		1.435
07:55	3.7		113		0.95		0.84		0.89		27		1		1.081
07:58	3.9		113		1		0.89		0.88		27		1.246		1.215
08:02	4.4		113		1.12		1.05		0.94		32		2.268		2.233
08:05	2.9		114		0.73		0.63		0.86		18		0.982		1.095
08:07	3.3		114		0.84		0.69		0.81		20		0.723		0.845
08:10	4.8		114		1.22		1		0.82		29		1.145		1.201
08:12	4.4		114		1.13		0.95		0.84		29		1.068		1.139
08:14	4.1		112		1.05		0.9		0.86		28		1.049		1.154
08:16	4.1		112		1.04		0.89		0.86		26		0.914		0.957
08:18	4.4		112		1.12		0.95		0.85		29		0.886		0.912
08:21	4.2		111		1.07		0.95		0.89		28		1.14		1.223
08:23	4.2		111		1.07		0.95		0.89		29		1.087		1.123
08:26	4.3		111		1.1		1		0.91		29		1.398		1.449
08:28	3.9		111		0.98		0.91		0.92		28		1.234		1.446
08:31	4.4		114		1.12		1.04		0.93		33		1.359		1.328
08:33	4.4		114		1.11		1.04		0.93		32		1.144		1.249
08:35	4.2		116		1.07		1		0.93		32		1.124		1.222
08:38	4.6		116		1.17		1.09		0.93		33		1.339		1.293
08:40	4		117		1.02		0.96		0.94		29		1.323		1.517
08:43	3.9		117		1		0.94		0.93		28		1.137		1.284
08:45	4.2		116		1.06		0.99		0.93		30		1.284		1.375
08:48	4.6		116		1.18		1.1		0.94		33		1.48		1.6
08:50	3.7		117		0.95		0.86		0.91		26		0.979		1.101
08:54	3.5		117		0.88		0.78		0.88		21		1.187		1.265
08:56	4.9		120		1.24		1.06		0.85		30		1.022		1.086
08:58	4.3		120		1.1		0.96		0.87		28		1.071		1.236
09:00	4.7		121		1.2		1.06		0.89		32		1.309		1.404
09:03	4.9		121		1.24		1.14		0.91		36		1.307		1.451
09:05	4.5		120		1.15		1.07		0.93		34		1.203		1.291
09:07	4.4		120		1.11		1.04		0.94		32		1.204		1.278
09:09	4.1		118		1.05		0.99		0.95		32		1.188		1.303
09:11	4.5		118		1.14		1.08		0.94		34		1.251		1.333
09:14	4.2		118		1.07		1		0.94		30		1.223		1.323
09:16	4.3		117		1.11		1.04		0.94		32		1.261		1.349
09:19	4		117		1.02		0.94		0.92		29		1.057		1.15
09:21	4.1		117		1.03		0.93		0.9		28		0.969		1.066
09:23	4.8		117		1.22		1.12		0.91		32		1.317		1.406
09:26	4.2		118		1.07		1		0.93		31		1.284		1.452
09:28	4.5		118		1.16		1.07		0.93		32		1.246		1.337
09:30	4.4		121		1.11		1.04		0.93		31		1.207		1.349
09:33	4.5		121		1.14		1.07		0.93		32		1.407		1.417
09:35	4.3		121		1.09		1.01		0.93		29		1.234		1.318
09:38	3.9		121		0.99		0.88		0.89		25		1.059		1.171
09:40	5.1		122		1.29		1.17		0.9		34		1.342		1.454
09:43	4.5		122		1.15		1.04		0.91		30		1.197		1.308
09:45	4.7		122		1.2		1.09		0.91		33		1.263		1.306
09:47	4.5		122		1.15		1.06		0.93		32		1.29		1.429
09:50	4.7		123		1.19		1.12		0.94		34		1.371		1.48
09:52	4.7		123		1.19		1.11		0.93		33		1.267		1.363
09:54	4.4		125		1.12		1.06		0.95		34		1.317		1.442
09:57	4.9		125		1.25		1.18		0.95		36		1.306		1.37
09:59	4.9		125		1.25		1.2		0.96		37		1.372		1.442
10:01	4.2		123		1.07		1.03		0.96		32		1.276		1.402
10:04	4.6		123		1.16		1.11		0.96		33		1.363		1.4
10:06	4.9		123		1.25		1.2		0.96		35		1.446		1.586
10:10	3.3		126		0.84		0.78		0.94		21		1.236		1.429
10:12	5		126		1.27		1.14		0.9		32		1.187		1.172
10:14	4.7		126		1.2		1.08		0.89		30		1.147		1.295
10:17	5.4		126		1.36		1.24		0.91		35		1.514		1.572
10:19	4.6		126		1.18		1.11		0.94		34		1.284		1.563
10:21	5.1		125		1.29		1.24		0.96		37		1.449		1.514
10:24	4.6		125		1.18		1.14		0.97		36		1.427		1.529
10:26	4.8		123		1.22		1.17		0.96		36		1.336		1.39
10:28	4.9		123		1.26		1.21		0.96		36		1.29		1.411
10:30	4.9		125		1.25		1.21		0.97		37		1.431		1.498
10:33	5.2		125		1.32		1.31		0.99		39		1.684		1.755
10:35	4.6		125		1.17		1.14		0.98		35		1.237		1.333
10:37	4.6		125		1.17		1.14		0.97		35		1.296		1.372
10:40	4.6		125		1.17		1.13		0.97		33		1.411		1.491
10:42	5		125		1.27		1.22		0.96		36		1.341		1.46
10:44	5		126		1.26		1.22		0.97		38		1.333		1.431
10:47	4		126		1.02		0.97		0.94		26		1.172		1.298
10:49	5.6		127		1.43		1.37		0.96		39		1.625		1.682
10:52	5.2		127		1.32		1.28		0.97		38		1.396		1.558
10:54	5		127		1.26		1.23		0.98		37		1.275		1.418
10:55	5.6		130		1.43		1.35		0.95		43		1.026		1.005
10:58	4.6		130		1.18		1.12		0.95		33		1.302		1.404
11:00	5.3		130		1.34		1.3		0.97		39		1.472		1.515
11:02	5.2		130		1.33		1.3		0.98		40		1.398		1.533
11:04	4.8		130		1.22		1.18		0.97		34		1.237		1.366
11:06	5.2		131		1.33		1.31		0.98		38		1.377		1.526
11:08	5.5		131		1.4		1.38		0.99		43		1.482		1.561
11:10	5.2		130		1.33		1.32		1		42		1.397		1.473
11:12	5		130		1.27		1.24		0.98		38		1.192		1.267
11:14	5.1		131		1.3		1.31		1		39		1.417		1.532
11:16	5.3		131		1.36		1.37		1		42		1.362		1.469
11:18	4.8		131		1.23		1.25		1.01		40		1.299		1.393
11:20	5.1		133		1.31		1.34		1.02		41		1.499		1.529
11:23	5.2		133		1.33		1.4		1.05		43		1.927		1.956
11:26	3.8		133		0.98		0.97		1		27		1.286		1.539
11:28	5.6		133		1.41		1.36		0.96		38		1.35		1.38
11:30	5.2		134		1.32		1.29		0.98		39		1.471		1.673
11:33	5.6		134		1.42		1.39		0.98		40		1.551		1.589
11:35	5.6		134		1.42		1.41		0.99		43		1.589		1.683
11:37	5.3		134		1.35		1.38		1.02		40		1.603		1.729
11:39	5.1		134		1.3		1.31		1.01		40		1.371		1.511
11:42	4.6		134		1.18		1.17		0.99		34		1.308		1.393
11:44	5.4		134		1.39		1.38		1		42		1.419		1.536
11:46	5.6		136		1.43		1.45		1.02		45		1.546		1.652
11:48	5.2		136		1.34		1.35		1.01		43		1.435		1.518
11:50	5.2		136		1.34		1.34		1		39		1.583		1.439
11:52	5.6		136		1.42		1.38		0.97		41		1.239		1.49
11:54	5.7		136		1.45		1.45		1		44		1.473		1.535
11:56	5		136		1.27		1.28		1.01		39		1.298		1.455
11:58	5.2		136		1.33		1.35		1.01		42		1.448		1.504
12:00	5.1		136		1.31		1.33		1.02		42		1.433		1.57
12:03	4		136		1.01		0.99		0.98		24		1.057		1.266
12:04	5.8		137		1.48		1.4		0.94		39		1.127		1.169
12:07	6		137		1.54		1.49		0.97		45		1.602		1.75
12:09	5.9		137		1.5		1.48		0.99		44		1.561		1.686
12:11	5.9		137		1.51		1.52		1.01		46		1.519		1.674
12:13	5.7		137		1.44		1.46		1.01		45		1.405		1.549
12:15	4.5		137		1.14		1.15		1.01		32		1.228		1.478
12:17	5.6		137		1.42		1.42		1		42		1.389		1.506
12:19	6		137		1.53		1.55		1.01		47		1.53		1.587
12:21	5.7		139		1.45		1.49		1.03		45		1.481		1.645
12:23	5.5		139		1.39		1.44		1.03		43		1.468		1.559
12:25	5.5		141		1.4		1.46		1.04		42		1.448		1.534
12:27	5.5		141		1.41		1.47		1.04		43		1.578		1.74
12:29	5.9		141		1.49		1.56		1.04		47		1.598		1.697
12:31	6		141		1.53		1.61		1.05		50		1.5		1.606
12:33	5.9		141		1.49		1.62		1.08		49		1.683		1.811
12:36	4.2		142		1.07		1.11		1.04		30		1.393		1.584
12:38	6.1		142		1.55		1.6		1.03		44		1.651		1.738
12:40	5.9		142		1.5		1.56		1.03		46		1.567		1.72
12:42	5.9		142		1.49		1.56		1.04		48		1.523		1.685
12:44	6.1		142		1.54		1.63		1.06		48		1.495		1.652
12:46	6.2		144		1.57		1.69		1.08		51		1.616		1.767
12:48	5.7		144		1.46		1.57		1.07		47		1.419		1.593
12:50	5.7		144		1.45		1.59		1.09		48		1.593		1.717
12:51	5.8		144		1.49		1.64		1.1		51		1.59		1.759
12:53	5.8		144		1.48		1.66		1.12		50		1.619		1.757
12:55	5.7		146		1.46		1.63		1.12		49		1.608		1.813
12:57	6		146		1.52		1.69		1.12		51		1.68		1.765
12:59	5.7		146		1.44		1.6		1.11		47		1.464		1.617
13:01	5.7		148		1.45		1.59		1.09		47		1.577		1.636
13:03	5.7		148		1.46		1.59		1.09		46		1.641		1.726
13:05	6.3		148		1.6		1.76		1.1		52		1.657		1.75
13:07	6.2		148		1.58		1.71		1.09		50		1.572		1.692
13:09	6.1		148		1.55		1.69		1.09		51		1.592		1.788
13:11	5.7		148		1.46		1.6		1.1		49		1.481		1.638
13:12	6.3		148		1.6		1.74		1.09		54		1.407		1.557
13:14	6		148		1.52		1.66		1.09		50		1.495		1.432
13:16	6.1		148		1.56		1.71		1.1		53		1.53		1.713
13:19	4.4		148		1.11		1.2		1.07		31		1.577		1.768
13:21	7		148		1.8		1.91		1.06		53		1.673		1.789
13:23	6.5		148		1.67		1.81		1.08		56		1.641		1.884
13:24	6.3		150		1.6		1.78		1.11		55		1.606		1.807
13:26	6.4		150		1.64		1.83		1.11		56		1.581		1.671
13:28	6.3		150		1.6		1.82		1.14		56		1.65		1.826
13:29	6.2		150		1.58		1.83		1.15		60		1.641		1.759
13:31	5.7		150		1.45		1.67		1.15		53		1.585		1.735
13:33	6.1		150		1.55		1.8		1.16		57		1.608		1.7
13:35	5.7		150		1.45		1.66		1.15		51		1.407		1.537
13:36	5.7		150		1.46		1.69		1.16		53		1.68		1.879
13:38	6		150		1.53		1.73		1.13		52		1.566		1.681
13:40	5.9		151		1.51		1.71		1.13		54		1.534		1.745
13:42	6		151		1.52		1.72		1.13		51		1.516		1.617
13:43	6		151		1.52		1.73		1.14		55		1.603		1.737
13:45	6.2		151		1.58		1.82		1.15		58		1.662		1.832
13:47	6.4		151		1.62		1.86		1.14		58		1.759		1.728
13:49	5.9		151		1.51		1.75		1.16		56		1.629		1.864
13:51	6		153		1.52		1.76		1.16		58		1.692		1.794
13:52	6.3		153		1.59		1.86		1.17		59		1.733		1.917
13:54	6.5		153		1.65		1.95		1.18		66		1.663		1.78
13:56	6.1		155		1.55		1.84		1.18		60		1.707		1.82
13:57	5.5		155		1.4		1.68		1.2		54		1.56		1.845
13:59	6.2		155		1.58		1.9		1.2		62		1.709		1.745
14:01	4.9		155		1.25		1.45		1.16		40		1.601		1.778
14:03	6.9		155		1.75		1.98		1.13		60		1.841		1.902
14:05	6.4		157		1.64		1.92		1.17		59		1.747		2.011
14:07	6.4		157		1.64		1.91		1.16		61		1.692		1.804
14:08	6.2		157		1.57		1.85		1.18		57		1.797		1.971
14:10	5.9		160		1.5		1.8		1.2		56		1.73		1.992
14:12	6		160		1.52		1.79		1.18		54		1.792		1.847
14:14	6.1		160		1.56		1.83		1.17		58		1.588		1.834
14:16	6.3		160		1.61		1.92		1.2		58		1.876		2.015
14:18	6.1		160		1.55		1.83		1.18		56		1.644		1.858
14:19	6.6		160		1.69		1.98		1.17		61		1.78		1.934
14:21	6.1		160		1.55		1.84		1.19		57		1.784		1.961
14:23	6.5		160		1.66		1.96		1.18		61		1.71		1.825
14:25	6.3		162		1.61		1.91		1.19		59		1.675		1.874
14:26	6.4		162		1.64		1.95		1.19		62		1.728		1.886
14:28	6		162		1.52		1.85		1.22		57		1.811		2.035
14:30	6.5		162		1.65		1.99		1.2		62		1.739		1.776
14:32	6.1		162		1.54		1.84		1.19		56		1.837		2.029
14:34	6.2		162		1.59		1.91		1.2		59		1.714		2.002
14:35	6.4		162		1.64		1.96		1.2		60		1.694		1.851
14:37	6.9		162		1.75		2.09		1.19		67		1.83		1.89
14:39	6.3		162		1.6		1.94		1.21		60		1.82		2.072
14:40	6.4		162		1.64		1.98		1.21		66		1.792		1.963
14:42	6.3		162		1.61		1.95		1.21		60		1.826		2.019
14:44	6.7		162		1.7		2.06		1.21		66		1.771		1.917
14:46	6.2		162		1.57		1.91		1.22		62		1.706		1.85
14:47	6.8		162		1.74		2.15		1.23		69		1.699		1.831
14:49	6.3		162		1.59		2		1.25		64		1.686		1.9
14:51	5.2		164		1.33		1.63		1.23		47		1.63		1.88
14:52	7.2		164		1.84		2.23		1.21		69		1.843		1.969
14:54	7		164		1.78		2.2		1.24		72		1.717		1.895
14:55	6.6		166		1.67		2.09		1.25		69		1.715		1.9
14:57	6.5		166		1.67		2.11		1.26		68		1.789		1.913
14:59	6		166		1.52		1.91		1.26		60		1.809		2.086
15:00	6.5		166		1.67		2.09		1.25		65		1.919		2
15:02	6.5		166		1.66		2.06		1.24		66		1.749		1.891
15:04	6.3		166		1.6		2.01		1.25		63		1.739		1.904
15:05	6.5		166		1.65		2.08		1.26		66		1.798		2.096
15:07	6.4		166		1.64		2.05		1.25		66		1.714		1.895
15:08	6.8		166		1.74		2.2		1.26		71		1.838		1.929
15:10	5.9		166		1.51		1.88		1.25		60		1.774		2.009
15:12	6.6		166		1.69		2.12		1.25		66		1.981		2.038
15:14	6.2		166		1.57		1.97		1.25		60		1.804		2.108
15:15	6.8		169		1.73		2.15		1.24		68		1.857		1.949
15:17	6.5		169		1.66		2.06		1.24		66		1.776		1.964
15:19	6.3		169		1.6		2		1.25		63		1.842		2.063
15:20	6.7		169		1.69		2.11		1.24		67		1.864		2.01
15:22	6.1		169		1.55		1.93		1.24		61		1.776		2.017
15:24	6.7		169		1.71		2.13		1.24		67		1.764		1.961
15:25	7		169		1.78		2.23		1.25		73		1.674		1.791
15:26	6.5		169		1.66		2.1		1.26		71		1.644		1.908
15:28	7.5		169		1.92		2.47		1.29		85		1.784		1.774
15:29	6.9		169		1.76		2.27		1.29		80		1.724		1.843
15:30	6.2		169		1.59		2.07		1.3		74		1.655		1.85
15:32	6.3		169		1.6		2.08		1.3		70		1.627		1.79
15:33	6.2		169		1.57		2.04		1.3		66		1.957		2.068
15:35	6.8		169		1.74		2.23		1.29		75		1.731		1.91
15:36	6.7		169		1.69		2.19		1.3		74		1.734		1.832
15:37	4.4		169		1.12		1.47		1.32		58		1.11		1.773
15:39	5.1		169		1.31		1.6		1.22		46		0.998		0.748
15:40	7.5		171		1.91		2.34		1.22		71		1.728		1.892
15:42	7.2		171		1.84		2.27		1.24		73		1.725		1.895
15:43	6.9		171		1.76		2.21		1.25		72		1.767		1.973
15:44	6.9		171		1.76		2.22		1.26		74		1.781		1.999
15:46	6.8		171		1.73		2.22		1.29		75		1.771		1.981
15:47	6.5		171		1.65		2.15		1.3		74		1.682		1.884
15:49	6.8		171		1.73		2.27		1.31		80		1.745		1.946
15:50	6.7		171		1.71		2.25		1.32		79		1.765		1.922
15:51	6.6		171		1.68		2.21		1.32		77		1.712		1.858
15:53	6.7		171		1.7		2.27		1.34		80		1.744		1.909
15:54	6.7		171		1.7		2.28		1.34		82		1.754		1.909
15:55	6.7		171		1.7		2.29		1.34		80		1.608		1.787
15:55	Recovery
15:57	5.3		171		1.36		1.84		1.35		66		1.73		2.112
15:58	6.4		171		1.62		2.13		1.31		71		1.763		1.828
16:00	6.2		173		1.59		2.05		1.29		67		1.882		2.015
16:02	6.2		173		1.57		2.01		1.28		65		1.86		2.075
16:03	6.4		173		1.62		2.09		1.28		67		1.836		2.01
16:05	5.7		171		1.46		1.88		1.28		56		1.985		2.283
16:07	6.8		171		1.74		2.16		1.24		68		1.648		1.733
16:08	6.6		171		1.69		2.09		1.24		68		1.649		1.787
16:09	6.8		169		1.72		2.17		1.26		73		1.568		1.79
16:11	6.5		169		1.66		2.08		1.25		68		1.608		1.693
16:12	6.5		169		1.64		2.06		1.25		68		1.667		1.797
16:14	6.2		169		1.59		1.98		1.25		65		1.687		1.867
16:16	6.1		166		1.55		1.95		1.26		63		1.746		1.864
16:17	6.1		166		1.56		1.97		1.26		63		1.77		1.98
16:19	5.9		166		1.51		1.92		1.27		61		1.812		1.986
16:21	5.3		164		1.35		1.73		1.28		52		1.745		2.051
16:23	5.9		164		1.5		1.9		1.27		61		1.677		1.967
16:24	6.2		164		1.59		2.03		1.28		65		1.682		1.773
16:26	5.8		164		1.49		1.91		1.29		62		1.736		1.857
16:28	5.2		164		1.31		1.72		1.31		55		1.708		1.943
16:30	6		162		1.53		2.01		1.31		63		1.818		1.934
16:31	5.6		162		1.42		1.89		1.33		61		1.738		1.989
16:33	5.2		162		1.32		1.76		1.34		57		1.589		1.744
16:35	5.4		162		1.37		1.85		1.35		61		1.73		1.887
16:36	5.4		162		1.37		1.83		1.34		59		1.684		1.786
16:38	5		162		1.29		1.74		1.36		56		1.693		1.886
16:40	4.6		160		1.18		1.58		1.34		50		1.607		1.801
16:42	4.9		160		1.25		1.69		1.35		56		1.689		1.931
16:44	3.9		160		1		1.37		1.37		48		1.556		1.896
17:00			157
17:15			151
17:31			148
17:47			139
18:03			133
18:18			134
18:34			134
18:50			130
19:06			130
19:22			127
19:37			127
19:53			126
20:09			127
20:25			126
20:40			125
20:56			127
	4.95361	1.96144	133.644	617.126	1.26131	0.127536	1.33192	0.316096	1.01125	0.037992	41.8	335.659	1.37093	0.138734	1.48642	0.168525
	METS						HR						VO2						VCO2						RER						VE						Vtex						Vtin						LABEL
	Rest		Test		Recovery		Rest		Test		Recovery		Rest		Test		Recovery		Rest		Test		Recovery		Rest		Test		Recovery		Rest		Test		Recovery		Rest		Test		Recovery		Rest		Test		Recovery
	MEDIA	VAR	MEDIA	VAR	MEDIA	VAR	MEDIA	VAR	MEDIA	VAR	MEDIA	VAR	MEDIA	VAR	MEDIA	VAR	MEDIA	VAR	MEDIA	VAR	MEDIA	VAR	MEDIA	VAR	MEDIA	VAR	MEDIA	VAR	MEDIA	VAR	MEDIA	VAR	MEDIA	VAR	MEDIA	VAR	MEDIA	VAR	MEDIA	VAR	MEDIA	VAR	MEDIA	VAR	MEDIA	VAR	MEDIA	VAR	BIN
	1.39091	0.574909	4.87976	2.02556	5.79655	0.475345	85.8182	9.96364	130.782	593.801	154.689	291.537	0.355455	0.0392073	1.24236	0.131699	1.47759	0.0303333	0.343636	0.0269055	1.28127	0.309074	1.91	0.0337143	0.97	0.0105091	0.986284	0.0334331	1.29621	0.0016101	14.3636	29.0545	40.0393	323.292	61.8966	38.4532	0.713167	0.115721	1.3404	0.13851	1.71941	0.00953689	0.792	0.146607	1.44969	0.165082	1.90569	0.0171034	1
	1.39091	0.574909	4.87976	2.02556	5.79655	0.475345	85.8182	9.96364	130.782	593.801	154.689	291.537	0.355455	0.0392073	1.24236	0.131699	1.47759	0.0303333	0.343636	0.0269055	1.28127	0.309074	1.91	0.0337143	0.97	0.0105091	0.986284	0.0334331	1.29621	0.0016101	14.3636	29.0545	40.0393	323.292	61.8966	38.4532	0.713167	0.115721	1.3404	0.13851	1.71941	0.00953689	0.792	0.146607	1.44969	0.165082	1.90569	0.0171034	1
[truncated: 1 more columns]
