# Supplementary material for: On the development of diagnostic support algorithms based on CPET biosignals data via machine learning and wavelets
Source: PeerJ journal article supplement (doi:10.7717/peerj-cs.2474), 2025-01-30
Supplement: raw_data.zip [file Subject19_BxB.xlsx]

## Sheet: Demographics
Gender:	female
Age:	53
Height (cm):	162
Weight (kg):	94.9
BMI:	36
Condition:	Metabolic Syndrome

## Sheet: Subject19_BxB
Time	METS		HR		V'O2		V'CO2		RER		V'E		VTex		VTin
min			1/min		L/min		L/min				L/min		L		L
00:00	Rest
00:42
00:58			95
01:14			107
01:29			95
01:45			86
02:01			86
02:17			92
02:32			93
02:48			98
02:57	0.3		97		0.08		0.08		0.94		3		0.473		0.131
03:00	1.4		96		0.46		0.41		0.88		13		0.614		0.677
03:03	1.9		96		0.62		0.57		0.92		18		0.77		0.726
03:06	1.5		93		0.49		0.46		0.95		16		0.708		0.849
03:08	1.7		93		0.58		0.55		0.95		18		0.78		0.686
03:11	1		95		0.33		0.32		0.97		12		0.523		0.617
03:14	0.9		95		0.28		0.28		1		11		0.518		0.561
03:16	1.1		95		0.38		0.38		1		13		0.557		0.482
03:19	0.6		95		0.2		0.2		1		9		0.404		0.533
03:22	0.5		93		0.18		0.18		1		8		0.396		0.477
03:25	0.5		92		0.15		0.15		0.99		7		0.336		0.444
03:28	1		92		0.32		0.31		0.97		11		0.494		0.423
03:30	0.9		92		0.31		0.3		0.94		11		0.39		0.362
03:32	1.5		92		0.51		0.49		0.96		16		0.671		0.626
03:35	0.6		96		0.2		0.19		0.94		8		0.373		0.508
03:38	1.3		96		0.43		0.4		0.93		12		0.608		0.59
03:41	1.2		96		0.4		0.37		0.92		13		0.547		0.592
03:43	0.8		96		0.25		0.23		0.92		9		0.393		0.489
03:46	0.8		107		0.28		0.26		0.91		10		0.414		0.495
03:48	0.6		107		0.21		0.19		0.93		8		0.366		0.512
03:51	0.3		107		0.09		0.08		0.93		5		0.239		0.489
03:54	1		116		0.33		0.31		0.94		10		0.552		0.529
03:57	1.2		116		0.39		0.36		0.92		13		0.508		0.444
03:59	1.4		103		0.45		0.42		0.92		14		0.579		0.517
04:02	1.4		103		0.47		0.45		0.95		15		0.622		0.65
04:05	0.9		98		0.31		0.3		0.98		11		0.553		0.684
04:08	0.9		98		0.29		0.29		0.97		11		0.501		0.525
04:11	0.7		97		0.24		0.23		0.98		9		0.503		0.618
04:14	0.6		97		0.19		0.19		0.96		7		0.397		0.558
04:17	0.6		96		0.2		0.19		0.93		8		0.389		0.484
04:17	Test
04:20	0.8		94		0.25		0.24		0.94		9		0.433		0.488
04:23	1.1		94		0.36		0.33		0.93		11		0.534		0.534
04:26	1.5		95		0.5		0.46		0.92		14		0.822		0.627
04:28	2.3		96		0.76		0.66		0.87		20		0.644		0.651
04:30	1.9		98		0.63		0.53		0.84		18		0.52		0.521
04:32	2.2		98		0.73		0.63		0.86		19		0.647		0.693
04:34	2		98		0.67		0.58		0.87		19		0.684		0.75
04:36	1.9		100		0.63		0.56		0.89		18		0.665		0.771
04:38	1.9		100		0.63		0.56		0.88		18		0.605		0.65
04:40	1.9		95		0.64		0.56		0.88		18		0.638		0.661
04:42	1.9		95		0.64		0.56		0.88		19		0.618		0.663
04:44	2		96		0.67		0.59		0.88		19		0.667		0.676
04:47	1.9		96		0.63		0.57		0.91		18		0.704		0.809
04:49	2.2		96		0.72		0.66		0.92		21		0.818		0.889
04:51	1.9		100		0.63		0.58		0.91		18		0.663		0.684
04:53	1.9		100		0.63		0.56		0.9		18		0.675		0.771
04:56	2		100		0.68		0.6		0.88		19		0.678		0.724
04:57	2.3		100		0.76		0.65		0.86		21		0.652		0.667
04:59	2.3		101		0.75		0.64		0.86		20		0.675		0.674
05:02	2.3		101		0.75		0.64		0.86		20		0.711		0.802
05:04	2.3		101		0.78		0.67		0.86		20		0.704		0.734
05:06	2.3		101		0.76		0.65		0.85		20		0.72		0.749
05:08	2.1		101		0.69		0.59		0.84		19		0.614		0.757
05:10	2.6		115		0.87		0.73		0.84		23		0.71		0.727
05:12	2.5		115		0.84		0.71		0.84		22		0.716		0.764
05:14	2.6		115		0.86		0.75		0.87		23		0.838		0.918
05:16	2.5		125		0.83		0.73		0.89		22		0.819		0.944
05:18	2.4		125		0.79		0.7		0.89		21		0.78		0.836
05:20	2.6		112		0.86		0.77		0.89		23		0.831		0.84
05:22	2.2		112		0.75		0.66		0.88		21		0.706		0.843
05:25	2.3		122		0.76		0.66		0.87		20		0.665		0.778
05:26	3.1		122		1.02		0.88		0.86		25		0.801		0.821
05:28	2.9		122		0.98		0.85		0.87		25		0.843		0.929
05:32	2.9		122		0.98		0.94		0.96		28		1.649		1.75
05:34	2.5		122		0.83		0.75		0.91		23		0.787		0.844
05:36	2.6		113		0.85		0.76		0.89		22		0.799		0.805
05:38	2.8		113		0.91		0.8		0.87		23		0.797		0.883
05:40	2.8		115		0.91		0.77		0.84		24		0.659		0.689
05:42	3.2		115		1.07		0.91		0.84		25		0.811		0.837
05:44	3.1		116		1.04		0.91		0.88		25		1.071		1.105
05:47	3		116		0.99		0.88		0.88		24		1.056		1.118
05:49	2.8		111		0.94		0.84		0.89		24		0.904		1.063
05:51	3.4		111		1.12		1.01		0.9		31		0.927		0.978
05:53	3		111		1.01		0.91		0.91		29		0.847		0.949
05:55	2.8		111		0.94		0.88		0.93		28		0.817		0.903
05:56	3.3		111		1.1		1.02		0.93		31		0.887		0.899
05:58	3.2		111		1.05		0.98		0.93		31		0.834		0.907
06:00	3.2		112		1.05		0.99		0.95		31		0.86		0.936
06:01	3		112		0.98		0.93		0.95		30		0.834		0.899
06:03	3		112		1.01		0.96		0.95		30		0.811		0.84
06:05	2.9		110		0.97		0.93		0.95		29		0.849		0.951
06:06	3.1		110		1.04		0.99		0.96		31		0.831		0.92
06:08	3.1		110		1.04		1.01		0.97		30		0.899		0.947
06:10	3.2		123		1.06		1.02		0.96		31		0.902		0.932
06:11	3		123		0.99		0.96		0.96		29		0.843		0.943
06:13	3.1		123		1.04		1.01		0.97		31		0.926		0.995
06:15	2.6		112		0.86		0.83		0.97		23		0.806		0.991
06:17	3		112		1.01		0.97		0.96		29		0.854		0.902
06:19	3.3		112		1.09		1.05		0.96		32		0.947		1.004
06:21	3.1		115		1.02		0.97		0.96		30		0.821		0.925
06:22	3.2		115		1.08		1.05		0.97		33		0.92		0.976
06:24	3		115		1		0.98		0.98		30		0.903		0.948
06:26	2.9		118		0.97		0.95		0.97		30		0.795		0.902
06:28	2.3		118		0.75		0.72		0.96		23		0.792		0.873
06:29	3.9		115		1.31		1.27		0.96		37		0.961		1.021
06:31	3.6		115		1.18		1.16		0.98		36		0.866		0.921
06:33	3.4		115		1.11		1.11		1		33		0.991		1.036
06:34	3.1		115		1.02		1.02		1		32		0.878		0.976
06:36	3.1		102		1.04		1.05		1.01		32		0.893		0.932
06:38	3.1		102		1.04		1.04		1		32		0.888		0.972
06:39	3.4		102		1.12		1.13		1.01		35		0.914		0.95
06:41	3.2		105		1.05		1.06		1.01		34		0.919		0.942
06:43	2.6		105		0.85		0.86		1		24		0.882		1.001
06:45	3.2		114		1.06		1.05		0.99		32		0.845		0.962
06:46	3.4		114		1.14		1.14		1		35		0.95		1.015
06:48	3.4		114		1.13		1.14		1.01		36		0.894		0.995
06:49	3.3		114		1.1		1.12		1.02		35		0.89		0.965
06:51	3.4		117		1.12		1.16		1.04		36		1.009		1.111
06:53	2.7		117		0.9		0.97		1.07		30		1.038		1.218
06:55	2.9		118		0.97		1.02		1.05		30		0.97		1.001
06:57	2.9		118		0.98		1.02		1.04		31		0.9		1.011
06:58	2.8		118		0.94		0.98		1.04		30		0.888		1.059
07:00	3.1		118		1.04		1.07		1.03		33		0.87		0.865
07:02	3.3		118		1.1		1.14		1.04		34		0.93		1.027
07:03	3.3		118		1.09		1.13		1.03		34		0.954		0.959
07:05	2.3		120		0.78		0.82		1.05		28		0.764		1.049
07:07	2.4		120		0.81		0.84		1.04		25		0.839		0.918
07:09	3.4		120		1.13		1.16		1.02		33		0.98		0.926
07:10	3.2		120		1.07		1.08		1.01		32		0.847		0.943
07:12	3.2		120		1.06		1.08		1.02		32		0.889		0.972
07:14	3.5		120		1.15		1.17		1.02		35		0.93		1.025
07:15	3.1		118		1.04		1.07		1.02		34		0.847		0.885
07:17	3.1		118		1.03		1.07		1.04		34		0.84		0.954
07:18	3		118		1.01		1.06		1.05		34		0.855		0.934
07:20	3.2		117		1.05		1.11		1.05		34		0.884		0.937
07:21	3		117		1		1.04		1.04		32		0.841		0.863
07:23	3.1		117		1.02		1.04		1.02		33		0.794		0.882
07:24	3.1		117		1.03		1.04		1.02		31		0.78		0.893
07:26	3.1		118		1.03		1.03		1		31		0.815		0.898
07:27	3.4		118		1.12		1.14		1.02		36		0.854		0.973
07:29	3		118		1		1.03		1.03		33		0.814		0.903
07:30	3		121		1.01		1.03		1.02		30		0.831		0.95
07:32	3.2		121		1.05		1.07		1.02		34		0.847		0.884
07:33	3		121		1		0.99		1		30		0.755		0.805
07:35	3.4		120		1.13		1.13		1		36		0.823		0.933
07:36	3.1		120		1.02		1.03		1.01		34		0.814		0.867
07:37	3.2		120		1.08		1.09		1.01		36		0.771		0.837
07:39	3		120		1.01		1.03		1.02		32		0.815		0.885
07:40	3.3		121		1.1		1.12		1.02		34		0.873		0.884
07:43	2.7		121		0.9		0.9		1.01		26		0.893		1.045
07:44	3.1		121		1.04		1.04		1		32		0.835		0.93
07:46	3.4		122		1.13		1.15		1.01		35		0.881		0.956
07:47	3		122		1		1.01		1.02		32		0.794		0.932
07:49	3.4		122		1.14		1.16		1.02		35		0.926		0.99
07:50	3.1		122		1.04		1.07		1.02		36		0.817		0.897
07:51	3.2		122		1.05		1.07		1.02		35		0.811		0.888
07:53	3.3		122		1.09		1.11		1.02		33		0.913		0.924
07:55	3.4		122		1.12		1.13		1.01		35		0.846		0.937
07:56	3		122		1		1		0.99		31		0.744		0.826
07:57	3.5		122		1.15		1.15		1		35		0.86		0.907
07:59	3.2		122		1.07		1.07		1		34		0.842		0.905
08:00	3.3		122		1.1		1.1		1		33		0.839		0.991
08:02	3.4		122		1.14		1.14		1.01		36		0.758		0.888
08:03	3.4		122		1.14		1.16		1.02		36		0.863		0.897
08:05	3		122		1		1.02		1.01		33		0.78		0.941
08:06	3.7		122		1.22		1.25		1.02		38		0.968		0.98
08:08	3.3		122		1.11		1.14		1.02		36		0.916		1.003
08:09	3.5		123		1.16		1.2		1.03		37		0.972		1.035
08:11	3.3		123		1.1		1.14		1.04		38		0.865		0.935
08:12	3.4		123		1.14		1.16		1.02		36		0.899		0.84
08:14	3.4		123		1.13		1.16		1.03		37		0.883		1.008
08:15	3.6		125		1.21		1.26		1.04		40		0.978		1.033
08:16	3.6		125		1.19		1.25		1.05		40		0.949		1.071
08:18	3.6		125		1.19		1.27		1.07		41		1.049		1.105
08:19	3.2		126		1.06		1.13		1.07		38		0.927		1.039
08:21	3.3		126		1.08		1.16		1.07		37		0.962		1.04
08:22	3.3		126		1.11		1.19		1.07		38		0.901		0.979
08:24	3.2		126		1.05		1.11		1.06		37		0.855		0.917
08:25	3.5		129		1.16		1.23		1.06		39		0.955		1.05
08:27	3.5		129		1.15		1.22		1.06		40		0.934		1.051
08:28	3.4		129		1.14		1.23		1.07		38		1.048		1.104
08:30	3.5		129		1.17		1.26		1.07		42		1.001		1.09
08:31	3.4		129		1.14		1.22		1.07		40		0.939		0.952
08:32	3.6		129		1.21		1.29		1.06		43		0.975		0.962
08:34	3.4		129		1.14		1.22		1.07		40		0.953		1.078
08:35	3.5		129		1.15		1.23		1.07		39		0.94		0.984
08:37	3.4		129		1.14		1.22		1.07		40		0.985		1.093
08:38	3.3		129		1.1		1.18		1.07		37		0.98		1.061
08:40	3.7		130		1.23		1.3		1.06		41		1.017		1.09
08:41	3.4		130		1.13		1.2		1.07		40		0.924		0.987
08:43	3.3		130		1.1		1.15		1.05		38		0.834		0.876
08:44	3.8		130		1.28		1.34		1.05		42		1.002		1.039
08:45	3.4		133		1.13		1.19		1.05		38		0.875		0.976
08:47	3.5		133		1.16		1.22		1.05		40		0.888		0.966
08:48	3.7		133		1.22		1.29		1.06		42		0.97		1.043
08:50	3.3		133		1.1		1.18		1.07		38		0.909		1.013
08:51	3.7		133		1.22		1.29		1.05		39		0.906		0.941
08:52	3.7		133		1.22		1.28		1.05		41		0.913		0.967
08:54	3.6		133		1.2		1.27		1.06		41		0.953		0.994
08:55	3.7		133		1.22		1.29		1.06		41		0.948		1.042
08:57	3.6		133		1.21		1.3		1.07		42		0.981		1.074
08:58	3.7		133		1.22		1.31		1.08		43		0.934		0.96
08:59	3.7		136		1.23		1.31		1.07		41		1.008		1.011
09:01	3.6		136		1.19		1.28		1.08		40		1.038		1.096
09:02	3.5		136		1.15		1.22		1.06		38		0.963		1.008
09:04	2.8		134		0.93		0.98		1.05		30		0.939		1.063
09:07	3.2		134		1.06		1.09		1.03		28		1.128		1.236
09:08	4		134		1.33		1.33		1		40		1.018		1.12
09:10	3.9		134		1.31		1.34		1.02		40		0.916		1.072
09:11	3.9		134		1.31		1.38		1.06		43		1.066		1.2
09:12	4		134		1.33		1.43		1.07		45		0.997		1.085
09:14	3.8		134		1.26		1.38		1.1		43		1.015		1.084
09:15	3.4		134		1.13		1.24		1.09		38		0.909		1.082
09:17	3.8		134		1.27		1.41		1.1		44		0.983		1.033
09:18	3.6		134		1.19		1.31		1.1		42		0.883		0.975
09:19	3.4		134		1.14		1.26		1.1		41		0.982		1.008
09:21	3.2		134		1.06		1.16		1.09		31		1.06		1.195
09:23	3.9		134		1.29		1.38		1.07		41		1.072		1.153
09:24	3.5		134		1.15		1.24		1.08		38		0.935		1.09
09:26	3.8		134		1.25		1.36		1.08		40		1.039		1.101
09:27	3.7		134		1.22		1.33		1.09		42		0.927		1.1
09:29	3.6		134		1.21		1.33		1.1		40		0.974		1.053
09:30	3.7		134		1.23		1.34		1.09		40		0.977		1.049
09:32	3.8		134		1.25		1.37		1.09		42		0.973		1.078
09:33	3.4		134		1.13		1.24		1.1		40		0.89		1.026
09:34	3.7		134		1.24		1.34		1.09		42		0.909		0.932
09:36	3.9		136		1.29		1.42		1.1		43		1.005		1.072
09:37	3.8		136		1.25		1.37		1.09		43		0.993		1.056
09:38	3.8		136		1.25		1.37		1.1		43		1.018		1.077
09:40	3.9		136		1.3		1.44		1.1		44		1.075		1.15
09:41	3.7		136		1.23		1.37		1.11		44		1.013		1.077
09:43	3.6		136		1.2		1.33		1.11		40		1.015		1.133
09:44	3.6		134		1.21		1.34		1.11		42		1.019		1.117
09:46	3.7		134		1.22		1.35		1.1		41		1.04		1.102
09:47	3.6		134		1.21		1.33		1.1		40		1.104		1.21
09:49	3.6		134		1.21		1.31		1.09		40		0.971		1.057
09:50	3.8		134		1.28		1.39		1.09		41		1.034		1.089
09:52	3.8		134		1.27		1.39		1.09		43		1.08		1.167
09:53	3.5		134		1.15		1.27		1.11		40		0.988		1.217
09:55	4.3		136		1.43		1.61		1.13		49		1.17		1.334
09:56	4.6		136		1.52		1.76		1.16		56		1.271		1.297
09:58	3.2		136		1.08		1.25		1.16		39		1.303		1.368
10:00	4.3		137		1.44		1.65		1.15		52		1.195		1.348
10:01	3.4		137		1.14		1.31		1.15		40		1.085		1.255
10:04	2.8		137		0.94		1.05		1.12		32		1.332		1.134
10:05	4.5		137		1.48		1.54		1.04		44		1.163		1.365
10:06	4.3		137		1.42		1.49		1.05		46		0.896		1.004
10:09	3.5		137		1.15		1.34		1.16		39		1.574		1.918
10:10	4.8		136		1.59		1.78		1.12		58		1.042		1.03
10:11	3.9		136		1.31		1.51		1.15		50		0.997		1.114
10:13	3.8		136		1.27		1.48		1.16		47		1.146		1.218
10:15	2.8		134		0.92		1.07		1.16		33		1.278		1.085
10:16	3.9		134		1.28		1.3		1.01		38		0.833		0.981
10:18	4.2		134		1.4		1.45		1.03		42		0.993		1.08
10:19	4		134		1.33		1.42		1.06		45		1		1.145
10:20	4.2		134		1.39		1.51		1.09		49		1.129		1.139
10:22	3.8		134		1.26		1.38		1.1		43		1.033		1.101
10:23	4.1		134		1.35		1.49		1.11		46		1.065		1.121
10:25	3.7		136		1.21		1.35		1.11		41		0.971		1.078
10:26	3.7		136		1.25		1.37		1.1		42		0.997		1.085
10:27	3.7		136		1.24		1.37		1.1		42		1.03		1.128
10:29	4		136		1.32		1.44		1.09		45		0.95		1.008
10:30	4		136		1.33		1.46		1.09		45		0.995		1.044
10:31	4.1		136		1.37		1.5		1.1		46		1.041		1.138
10:33	3.9		136		1.28		1.41		1.1		44		0.898		0.975
10:34	3.8		136		1.28		1.42		1.11		44		0.885		1.074
10:35	2.9		139		0.96		1.03		1.08		36		0.823		0.767
10:37	4.6		139		1.52		1.61		1.06		46		1.094		1.109
10:38	4.1		139		1.35		1.43		1.06		44		0.927		1.034
10:39	4.1		139		1.35		1.46		1.08		44		1.017		1.129
10:41	3.9		139		1.3		1.41		1.08		44		1.045		1.181
10:42	4		139		1.31		1.44		1.1		48		1.079		1.177
10:43	4.2		139		1.4		1.54		1.1		49		1.109		1.115
10:45	4.1		139		1.38		1.51		1.1		47		1.068		1.124
10:46	4.3		139		1.42		1.58		1.11		48		1.115		1.216
10:48	4.2		139		1.39		1.53		1.11		49		1.088		1.082
10:49	3.8		139		1.25		1.38		1.11		45		1.069		1.253
10:50	4.1		141		1.35		1.5		1.11		45		1.126		1.156
10:52	4		141		1.33		1.47		1.1		46		1.134		1.202
10:53	4.1		141		1.36		1.47		1.08		46		1.007		1.077
10:55	4.5		142		1.48		1.63		1.1		50		1.104		1.179
10:56	4.2		142		1.41		1.56		1.11		51		0.967		1.068
10:57	4.2		142		1.38		1.55		1.12		49		1.03		1.119
10:58	4.3		142		1.43		1.6		1.12		50		1.016		1.08
11:00	4.3		144		1.43		1.59		1.11		48		1.101		1.126
11:01	4.7		144		1.55		1.72		1.11		53		1.171		1.18
11:02	3.8		144		1.28		1.42		1.11		46		1.008		1.139
11:04	4.2		144		1.39		1.54		1.11		47		1.081		1.111
11:05	4		144		1.34		1.46		1.09		45		1.03		1.145
11:06	4.3		144		1.44		1.61		1.11		50		1.134		1.252
11:08	4.5		144		1.5		1.65		1.1		50		1.102		1.089
11:09	4.2		144		1.4		1.55		1.1		50		1.06		1.193
11:10	4.4		146		1.45		1.6		1.11		49		1.088		1.113
11:12	4.4		146		1.48		1.66		1.12		51		1.191		1.283
11:13	4.3		146		1.43		1.58		1.11		50		0.901		0.966
11:14	4.4		146		1.45		1.6		1.1		52		0.892		0.991
11:15	4.5		148		1.48		1.67		1.12		55		0.95		1.06
11:16	4.3		148		1.44		1.63		1.13		54		0.947		0.996
11:17	4.4		148		1.45		1.66		1.14		53		1.014		1.063
11:18	4.2		148		1.39		1.58		1.14		49		0.989		1.009
11:19	4.2		150		1.41		1.59		1.13		50		1.055		1.162
11:21	4.4		150		1.48		1.67		1.13		52		1.072		1.153
11:22	4.6		150		1.52		1.75		1.15		55		1.09		1.153
11:23	4.6		150		1.54		1.77		1.15		57		1.129		1.217
11:24	4.6		148		1.51		1.77		1.17		58		1.189		1.276
11:25	4.1		148		1.36		1.59		1.17		53		1.086		1.164
11:27	4.5		148		1.49		1.74		1.17		58		1.126		1.175
11:28	4.4		148		1.46		1.71		1.17		54		1.16		1.228
11:29	4.5		148		1.48		1.71		1.16		56		1.089		1.153
11:30	4.6		150		1.53		1.8		1.18		56		1.176		1.185
11:32	4.3		150		1.42		1.66		1.17		54		1.166		1.283
11:33	4.4		150		1.48		1.72		1.17		56		1.05		1.124
11:34	4.4		150		1.48		1.72		1.17		56		1.052		1.101
11:35	4.5		150		1.49		1.75		1.18		57		1.153		1.208
11:36	4.5		150		1.49		1.75		1.17		56		1.143		1.198
11:38	4.4		150		1.45		1.69		1.17		53		1.145		1.227
11:39	4.5		150		1.51		1.75		1.16		55		1.179		1.237
11:40	4.5		150		1.48		1.73		1.17		55		1.154		1.207
11:41	4.1		150		1.37		1.61		1.17		53		1.122		1.228
11:43	4.6		150		1.53		1.78		1.16		56		1.169		1.206
11:44	4.6		150		1.53		1.78		1.17		58		1.145		1.23
11:45	4.5		151		1.49		1.75		1.18		56		1.121		1.198
11:46	4.5		151		1.49		1.77		1.19		56		1.195		1.314
11:47	4.7		151		1.56		1.85		1.18		61		1.125		1.188
11:49	4.4		151		1.46		1.75		1.2		58		1.039		1.138
11:50	4.1		151		1.35		1.6		1.19		54		0.978		1.086
11:51	4.6		151		1.54		1.81		1.18		57		1.083		1.08
11:52	4.4		151		1.47		1.73		1.17		56		1.197		1.235
11:53	4.4		151		1.47		1.7		1.16		53		1.111		1.169
11:55	4.5		151		1.5		1.74		1.16		54		1.113		1.195
11:56	4.5		151		1.48		1.72		1.16		53		1.11		1.176
11:57	4.7		151		1.55		1.82		1.17		58		1.198		1.207
11:58	4.1		151		1.38		1.61		1.17		53		1.047		1.142
11:59	4.4		150		1.47		1.71		1.16		55		1.1		1.092
12:01	4.3		150		1.44		1.67		1.17		53		1.116		1.249
12:02	4.7		150		1.56		1.82		1.17		58		1.208		1.235
12:03	4.4		150		1.47		1.75		1.19		56		1.212		1.334
12:04	4.5		153		1.49		1.78		1.2		58		1.18		1.215
12:06	4.3		153		1.44		1.68		1.17		56		1.036		1.105
12:07	4.4		153		1.45		1.71		1.17		54		1.162		1.197
12:08	4.3		153		1.42		1.65		1.16		51		1.1		1.206
12:09	4.5		151		1.5		1.73		1.15		53		1.109		1.127
12:11	4.9		151		1.63		1.87		1.15		59		1.185		1.288
12:12	4.8		151		1.59		1.87		1.17		61		1.203		1.297
12:13	5		151		1.66		1.96		1.18		63		1.242		1.257
12:14	4.4		151		1.47		1.75		1.19		57		1.177		1.254
12:16	4.4		151		1.47		1.73		1.18		55		1.218		1.273
12:17	4.4		151		1.48		1.73		1.17		53		1.138		1.222
12:18	4.7		151		1.55		1.81		1.17		57		1.208		1.309
12:19	4.5		151		1.5		1.76		1.17		57		1.066		1.11
12:20	4.6		151		1.52		1.77		1.16		58		1.034		1.09
12:21	4.7		151		1.56		1.82		1.17		58		1.1		1.154
12:23	4.6		151		1.52		1.79		1.17		58		1.221		1.252
12:24	4.4		151		1.45		1.69		1.16		54		1.142		1.283
12:25	3.9		151		1.29		1.52		1.18		49		1.175		1.241
12:28	3.7		151		1.23		1.36		1.1		36		1.516		1.209
12:29	6.2		151		2.06		2.19		1.07		69		1.357		1.675
12:30	6.1		151		2.02		2.28		1.13		75		1.387		1.37
12:31	5		151		1.65		1.94		1.18		67		1.259		1.442
12:33	5.2		151		1.71		2.09		1.22		71		1.358		1.356
12:34	4.8		151		1.58		1.96		1.24		68		1.284		1.333
12:35	4.7		150		1.57		1.94		1.24		65		1.291		1.282
12:36	4.2		150		1.4		1.74		1.24		58		1.261		1.397
12:37	4.9		150		1.63		1.98		1.21		66		1.282		1.266
12:38	4.8		150		1.59		1.96		1.23		67		1.201		1.268
12:40	4.6		150		1.51		1.89		1.25		63		1.183		1.295
12:41	4.7		150		1.55		1.91		1.23		63		1.133		1.164
12:42	5		150		1.65		2.03		1.23		68		1.271		1.232
12:43	4.5		150		1.49		1.83		1.23		60		1.183		1.22
12:44	4.5		150		1.49		1.8		1.2		60		1.084		1.143
12:45	4.6		150		1.54		1.85		1.21		61		1.06		1.123
12:46	4.7		150		1.56		1.87		1.2		62		1.144		1.18
12:47	4.4		150		1.45		1.75		1.21		59		1.07		1.158
12:48	4.4		150		1.45		1.72		1.18		57		1.051		1.07
12:49	4.6		150		1.54		1.81		1.18		61		1.129		1.168
12:51	4.7		150		1.57		1.89		1.2		60		1.25		1.277
12:52	4.7		150		1.56		1.85		1.19		62		1.168		1.283
12:53	4.6		150		1.53		1.82		1.19		60		1.127		1.15
12:55	3.7		150		1.24		1.46		1.17		44		1.452		1.303
12:56	5.3		150		1.76		1.95		1.11		59		1.275		1.54
12:58	4.7		150		1.57		1.79		1.14		56		1.425		1.446
12:59	4.4		151		1.46		1.68		1.15		54		1.348		1.447
12:59	Recovery
13:00	5.5		151		1.84		2.15		1.17		69		1.285		1.369
13:01	5.2		151		1.71		2.06		1.2		68		1.249		1.308
13:03	4.7		151		1.55		1.89		1.22		65		1.191		1.291
13:04	4.3		151		1.43		1.76		1.24		60		1.35		1.4
13:05	4.4		151		1.46		1.81		1.24		60		1.353		1.459
13:07	4.3		151		1.44		1.79		1.24		59		1.3		1.361
13:08	4.4		151		1.47		1.83		1.25		62		1.257		1.414
13:09	4.6		151		1.54		1.93		1.26		65		1.396		1.339
13:10	4.2		150		1.39		1.73		1.24		58		1.204		1.314
13:11	4.4		150		1.47		1.84		1.25		62		1.119		1.19
13:13	4		150		1.34		1.7		1.27		57		1.185		1.22
13:14	3.7		150		1.23		1.51		1.23		53		1.027		1.195
13:15	4.3		150		1.44		1.78		1.24		60		1.209		1.234
13:16	4.7		150		1.57		1.91		1.22		59		1.272		1.225
13:17	4.5		150		1.48		1.8		1.21		61		1.098		1.22
13:19	4.3		150		1.43		1.72		1.21		56		1.048		1.061
13:20	4.4		150		1.45		1.74		1.2		56		1.055		1.097
13:21	4.2		150		1.4		1.68		1.2		55		1.069		1.176
13:22	4.6		150		1.54		1.86		1.21		59		1.182		1.165
13:23	4.2		150		1.39		1.69		1.21		55		1.024		1.185
13:24	4		150		1.33		1.63		1.23		53		1.051		1.12
13:25	4.4		150		1.46		1.76		1.21		57		1.09		1.091
13:27	4.2		150		1.38		1.68		1.22		56		0.986		1.132
13:28	4		150		1.34		1.64		1.23		53		0.94		1.055
13:29	4		150		1.34		1.65		1.23		55		0.983		1.066
13:30	3.9		150		1.3		1.58		1.22		52		0.937		0.995
13:31	3.9		150		1.3		1.6		1.23		49		1.143		1.214
13:32	4		150		1.34		1.64		1.22		51		1.132		1.211
13:34	3.9		150		1.3		1.59		1.23		48		1.121		1.226
13:35	3.6		148		1.18		1.42		1.21		49		0.869		0.991
13:36	3.8		148		1.26		1.54		1.22		51		0.979		1.062
13:37	4.1		148		1.35		1.62		1.2		51		0.969		0.956
13:39	4.2		148		1.4		1.67		1.2		51		1.166		1.131
13:40	4.1		146		1.36		1.64		1.21		50		1.181		1.304
13:42	4		146		1.34		1.62		1.21		50		1.252		1.331
13:43	3.9		146		1.29		1.56		1.21		50		1.143		1.232
13:44	3.8		146		1.27		1.56		1.22		51		1.113		1.186
13:46	3.7		146		1.24		1.52		1.23		50		1.132		1.223
13:47	3.8		146		1.27		1.55		1.22		51		1.065		1.112
13:48	3.6		146		1.19		1.45		1.22		47		1.02		1.055
13:49	3.2		144		1.06		1.3		1.22		44		0.943		1.148
13:51	3.5		144		1.17		1.41		1.2		46		0.968		0.978
13:52	3.8		144		1.25		1.51		1.21		47		1.079		1.095
13:53	3.5		144		1.16		1.39		1.2		44		1.027		1.11
13:55	4.2		142		1.39		1.66		1.2		50		1.18		1.145
13:56	3.6		142		1.21		1.46		1.21		47		1.103		1.228
13:58	3.6		142		1.18		1.42		1.2		48		0.974		1.047
13:59	3.9		142		1.3		1.56		1.2		49		1.112		1.086
14:00	3.6		142		1.21		1.46		1.21		48		1.026		1.164
14:01	3.4		142		1.12		1.36		1.22		46		0.933		1.046
14:03	3.7		142		1.22		1.49		1.22		51		0.987		1.03
14:04	4		142		1.31		1.63		1.24		53		1.101		1.078
14:05	3.3		142		1.09		1.36		1.25		46		1.023		1.174
14:07	2.9		142		0.96		1.22		1.27		41		1.031		1.299
14:09	1.7		142		0.57		0.72		1.26		29		1.071		1.101
14:25			136
14:40			134
14:56			130
15:12			127
15:27			126
15:43			125
15:59			125
16:15			121
16:30			117
	3.6801	0.612457	133.015	247.096	1.22267	0.0673105	1.34564	0.141182	1.08368	0.011242	42.6499	161.46	0.998025	0.0303385	1.06884	0.0324912
	METS						HR						VO2						VCO2						RER						VE						Vtex						Vtin						LABEL
	Rest		Test		Recovery		Rest		Test		Recovery		Rest		Test		Recovery		Rest		Test		Recovery		Rest		Test		Recovery		Rest		Test		Recovery		Rest		Test		Recovery		Rest		Test		Recovery
	MEDIA	VAR	MEDIA	VAR	MEDIA	VAR	MEDIA	VAR	MEDIA	VAR	MEDIA	VAR	MEDIA	VAR	MEDIA	VAR	MEDIA	VAR	MEDIA	VAR	MEDIA	VAR	MEDIA	VAR	MEDIA	VAR	MEDIA	VAR	MEDIA	VAR	MEDIA	VAR	MEDIA	VAR	MEDIA	VAR	MEDIA	VAR	MEDIA	VAR	MEDIA	VAR	MEDIA	VAR	MEDIA	VAR	MEDIA	VAR	BIN
	0.97	0.169759	3.62953	0.643377	3.99455	0.311636	97.2895	44.7518	130.857	251.472	144.547	66.9501	0.320667	0.0191582	1.20582	0.0706314	1.32745	0.0346045	0.304667	0.0163775	1.30167	0.142206	1.61909	0.0489269	0.95	0.000958621	1.06149	0.00942856	1.22164	0.000399125	10.9667	12.8609	40.9912	159.727	52.9636	49.6283	0.505933	0.0166968	0.981032	0.0308874	1.10369	0.014233	0.5426	0.0165409	1.05171	0.0334027	1.17536	0.0139208	1
	0.97	0.169759	3.62953	0.643377	3.99455	0.311636	97.2895	44.7518	130.857	251.472	144.547	66.9501	0.320667	0.0191582	1.20582	0.0706314	1.32745	0.0346045	0.304667	0.0163775	1.30167	0.142206	1.61909	0.0489269	0.95	0.000958621	1.06149	0.00942856	1.22164	0.000399125	10.9667	12.8609	40.9912	159.727	52.9636	49.6283	0.505933	0.0166968	0.981032	0.0308874	1.10369	0.014233	0.5426	0.0165409	1.05171	0.0334027	1.17536	0.0139208	1
[truncated: 1 more columns]
