# Supplementary material for: On the development of diagnostic support algorithms based on CPET biosignals data via machine learning and wavelets
Source: PeerJ journal article supplement (doi:10.7717/peerj-cs.2474), 2025-01-30
Supplement: raw_data.zip [file Subject20_BxB.xlsx]

## Sheet: Demographics
Gender:	female
Age:	52
Height (cm):	162
Weight (kg):	121.5
BMI:	46
Condition:	Metabolic Syndrome

## Sheet: Subject20_BxB
Time	METS		HR		V'O2		V'CO2		RER		V'E		VTex		VTin
min			1/min		L/min		L/min				L/min		L		L
00:00	Rest
02:42									0.9				0.193
02:45	1		83		0.43		0.39		0.91		14		0.793		1.14
02:49	1.2		83		0.51		0.47		0.93		18		0.966		1.091
02:52	1.2		83		0.52		0.49		0.95		18		1.018		1.108
02:55	0.9		85		0.37		0.34		0.93		13		0.63		0.729
02:58	1		85		0.4		0.37		0.93		14		0.725		0.796
03:00	0.5		85		0.23		0.21		0.9		10		0.383		0.552
03:06	0.6		84		0.26		0.22		0.85		9		0.788		0.619
03:09	1.1		84		0.45		0.38		0.83		13		0.697		0.65
03:12	1.1		83		0.48		0.4		0.83		14		0.733		0.733
03:15	1.1		82		0.46		0.39		0.86		14		0.783		0.902
03:21	1.9		85		0.8		0.71		0.89		24		2.509		2.376
03:25	1.1		89		0.46		0.41		0.89		15		0.894		1.049
03:29	0.9		86		0.4		0.36		0.91		13		0.956		1.005
03:33	1.1		86		0.46		0.41		0.88		14		0.829		0.735
03:36	1.2		82		0.52		0.46		0.89		17		0.844		0.818
03:40	0.8		79		0.36		0.32		0.89		11		0.833		1.065
03:40	Test
03:44	1		80		0.44		0.38		0.86		13		0.798		0.733
03:47	1.2		80		0.5		0.43		0.86		15		0.733		0.709
03:50	1.7		81		0.74		0.64		0.87		22		1.061		1.005
03:53	1.3		81		0.54		0.45		0.83		16		0.725		0.668
03:55	1.4		83		0.59		0.47		0.78		17		0.603		0.657
03:58	1.8		83		0.78		0.65		0.83		20		1.315		1.311
04:01	1.6		89		0.7		0.56		0.81		20		0.794		0.765
04:03	1.6		89		0.66		0.53		0.8		18		0.786		0.802
04:06	1.6		93		0.69		0.55		0.8		19		0.823		0.869
04:09	1.9		93		0.82		0.65		0.8		22		0.916		0.9
04:11	1.7		96		0.73		0.59		0.8		20		0.816		0.82
04:14	1.9		96		0.82		0.68		0.82		23		1.14		1.18
04:17	1.8		96		0.78		0.65		0.83		22		0.977		1.011
04:19	1.9		96		0.8		0.67		0.84		23		0.973		1.009
04:21	1.9		96		0.82		0.69		0.85		25		0.956		1.024
04:24	1.7		96		0.72		0.61		0.84		21		0.882		0.918
04:26	1.8		96		0.78		0.65		0.83		24		0.824		0.882
04:28	1.8		96		0.75		0.61		0.82		22		0.768		0.814
04:30	1.8		97		0.75		0.62		0.83		23		0.828		1.17
04:33	2.2		97		0.95		0.79		0.84		26		1.089		0.926
04:35	2.2		97		0.93		0.77		0.82		27		0.971		0.954
04:37	2.1		97		0.87		0.72		0.82		25		0.964		0.964
04:40	2.1		96		0.89		0.73		0.81		25		0.981		1.065
04:42	2.1		96		0.89		0.72		0.81		25		0.952		0.988
04:44	2.1		96		0.9		0.72		0.8		25		0.952		0.982
04:47	2.2		96		0.94		0.75		0.8		26		1.118		1.179
04:49	2.2		96		0.93		0.75		0.81		26		1.13		1.218
04:52	2.3		96		1		0.8		0.81		27		1.236		1.225
04:55	1.8		96		0.78		0.6		0.77		21		0.853		0.908
04:58	2.8		96		1.18		0.94		0.8		31		1.794		1.891
05:00	2.4		97		1.01		0.8		0.79		28		1.081		1.029
05:03	2.2		97		0.95		0.75		0.79		25		1.047		1.047
05:06	2.2		96		0.96		0.74		0.77		25		1.091		1.12
05:08	2.1		96		0.91		0.68		0.75		23		0.877		0.961
05:11	2.5		96		1.07		0.81		0.76		27		1.212		1.235
05:13	2.4		96		1.04		0.77		0.75		26		1.029		1.079
05:15	2.4		96		1.02		0.75		0.74		26		0.958		0.957
05:18	2.5		96		1.07		0.83		0.77		27		1.391		1.508
05:20	2.2		98		0.93		0.68		0.73		24		0.75		0.789
05:23	2.6		98		1.12		0.86		0.77		28		1.312		1.337
05:25	2.6		100		1.1		0.84		0.76		29		1.123		1.192
05:28	2.6		100		1.12		0.88		0.79		29		1.337		1.404
05:31	2.4		100		1.04		0.81		0.78		27		1.209		1.271
05:33	2.5		100		1.06		0.82		0.77		27		1.137		1.118
05:36	2.4		100		1.03		0.8		0.78		26		1.277		1.28
05:39	2.6		100		1.09		0.85		0.77		28		1.207		1.33
05:41	2.6		99		1.1		0.85		0.77		28		1.015		1.06
05:43	2.8		99		1.19		0.94		0.79		32		1.312		1.325
05:45	2.6		99		1.09		0.84		0.78		29		1.046		1.093
05:48	2.6		99		1.08		0.86		0.79		29		1.125		1.213
05:51	2.7		98		1.15		0.95		0.83		32		1.479		1.598
05:53	2.5		98		1.05		0.87		0.83		30		1.243		1.356
05:56	2.5		100		1.07		0.88		0.82		30		1.227		1.225
05:58	2.5		100		1.07		0.86		0.8		29		1.128		1.128
06:00	2.3		101		0.98		0.77		0.78		27		0.99		1.022
06:02	2.5		101		1.06		0.82		0.77		27		1.022		1.045
06:05	2.6		101		1.1		0.87		0.79		28		1.368		1.464
06:08	2.5		101		1.06		0.81		0.76		27		1.009		1.058
06:10	2.7		100		1.15		0.89		0.77		30		1.023		1.08
06:12	2.6		100		1.11		0.86		0.77		29		1.047		1.042
06:14	2.7		101		1.16		0.91		0.79		30		1.345		1.406
06:16	2.7		101		1.13		0.88		0.77		29		1.037		1.05
06:19	2.5		101		1.08		0.84		0.78		28		1.029		1.065
06:21	2.7		102		1.13		0.9		0.79		30		1.197		1.24
06:24	2.5		102		1.08		0.87		0.81		28		1.383		1.484
06:27	2.6		104		1.1		0.88		0.79		29		1.301		1.336
06:29	2.6		104		1.09		0.87		0.8		28		1.243		1.322
06:32	2.6		104		1.12		0.89		0.79		29		1.182		1.257
06:34	2.8		104		1.18		0.94		0.8		31		1.282		1.362
06:37	2.7		104		1.14		0.91		0.79		30		1.24		1.344
06:39	2.7		105		1.17		0.93		0.8		31		1.236		1.235
06:44	2.6		105		1.1		0.93		0.84		29		2.232		2.441
06:46	2.6		105		1.11		0.86		0.78		28		1.051		1.044
06:48	2.6		105		1.09		0.82		0.76		27		1.002		1.069
06:51	2.6		104		1.09		0.85		0.78		27		1.335		1.509
06:54	2.7		104		1.16		0.9		0.77		29		1.269		1.321
06:57	2.7		103		1.16		0.91		0.79		29		1.431		1.481
06:59	2.8		102		1.19		0.92		0.78		30		1.213		1.285
07:02	2.8		102		1.19		0.94		0.79		31		1.314		1.343
07:05	2.6		103		1.11		0.88		0.8		29		1.331		1.364
07:07	2.6		103		1.11		0.87		0.78		28		1.241		1.284
07:10	2.7		103		1.15		0.89		0.77		29		1.175		1.233
07:12	2.6		103		1.12		0.86		0.77		28		1.084		1.179
07:15	2.9		103		1.24		0.97		0.78		32		1.225		1.309
07:17	2.8		103		1.19		0.94		0.79		31		1.27		1.316
07:19	2.5		105		1.05		0.82		0.78		27		1.027		1.093
07:22	2.1		105		0.9		0.69		0.77		22		0.846		0.987
07:24	3.1		105		1.32		1.03		0.78		33		1.463		1.449
07:27	2.9		105		1.25		0.98		0.78		32		1.204		1.247
07:28	2.9		105		1.23		0.96		0.78		33		1.05		1.147
07:31	3		105		1.26		1.02		0.81		33		1.347		1.364
07:33	3		105		1.26		1.01		0.81		34		1.245		1.286
07:36	2.9		106		1.23		1.01		0.82		33		1.384		1.412
07:38	2.6		106		1.11		0.9		0.81		30		1.141		1.175
07:40	2.8		106		1.19		0.97		0.81		31		1.15		1.204
07:42	2.9		106		1.22		1		0.82		33		1.234		1.257
07:44	2.8		106		1.21		0.99		0.82		33		1.159		1.225
07:46	2.7		106		1.15		0.92		0.8		31		1.045		1.085
07:49	2.8		106		1.21		0.98		0.81		32		1.272		1.262
07:51	2.8		106		1.17		0.95		0.81		31		1.162		1.244
07:53	2.8		106		1.19		0.97		0.81		32		1.232		1.275
07:56	2.8		107		1.21		0.99		0.82		32		1.239		1.336
07:58	2.9		107		1.21		1.01		0.83		33		1.393		1.499
08:00	2.9		108		1.22		0.99		0.81		33		1.202		1.188
08:03	2.9		108		1.22		0.98		0.8		32		1.156		1.238
08:07	3		109		1.26		1.1		0.87		34		2.41		2.567
08:09	2.9		109		1.22		0.99		0.81		33		1.11		1.123
08:11	2.8		110		1.21		0.97		0.8		33		1.048		1.095
08:13	3		110		1.27		1.03		0.82		34		1.232		1.333
08:15	2.9		109		1.22		0.98		0.81		33		1.082		1.168
08:17	3		109		1.26		1.04		0.82		34		1.276		1.351
08:19	3		109		1.29		1.03		0.8		35		1.114		1.156
08:21	3.2		110		1.37		1.11		0.81		38		1.271		1.276
08:23	3.1		110		1.32		1.08		0.82		36		1.348		1.436
08:25	3.1		111		1.32		1.07		0.82		36		1.22		1.315
08:27	2.9		111		1.22		0.99		0.81		33		1.116		1.196
08:30	3.1		111		1.32		1.1		0.83		35		1.503		1.606
08:33	2.9		111		1.25		1.05		0.84		34		1.507		1.581
08:35	3		111		1.3		1.07		0.83		35		1.424		1.501
08:38	3.1		111		1.3		1.08		0.83		34		1.482		1.558
08:40	3.2		113		1.35		1.12		0.83		35		1.473		1.57
08:42	3		113		1.29		1.06		0.82		35		1.244		1.372
08:45	3.2		114		1.38		1.15		0.83		37		1.455		1.493
08:47	3.3		114		1.38		1.16		0.84		37		1.434		1.527
08:50	2.9		113		1.24		1.03		0.83		32		1.409		1.534
08:52	3.2		113		1.34		1.09		0.81		34		1.378		1.429
08:54	3.1		114		1.32		1.07		0.81		33		1.249		1.385
08:57	3.2		114		1.38		1.14		0.83		36		1.583		1.692
08:59	2.9		114		1.25		1.03		0.82		33		1.329		1.46
09:02	3.2		114		1.34		1.09		0.81		34		1.28		1.367
09:04	3.2		114		1.35		1.09		0.81		35		1.188		1.304
09:06	3.3		115		1.4		1.14		0.82		36		1.3		1.332
09:09	3.3		115		1.42		1.23		0.86		39		2.052		2.197
09:11	3.2		115		1.34		1.13		0.84		37		1.331		1.447
09:13	3.1		115		1.32		1.1		0.83		36		1.232		1.352
09:15	3.3		115		1.38		1.15		0.83		38		1.311		1.353
09:18	3.4		115		1.45		1.22		0.84		39		1.446		1.535
09:21	3.3		116		1.41		1.27		0.9		39		2.442		2.593
09:24	3		116		1.27		1.08		0.85		34		1.367		1.419
09:26	2.9		115		1.25		1.03		0.82		31		1.324		1.432
09:28	2.8		115		1.21		0.96		0.79		30		1.02		1.206
09:31	3.8		113		1.6		1.34		0.84		42		1.731		1.762
09:33	2.8		113		1.2		0.99		0.83		31		1.317		1.418
09:36	3.1		113		1.33		1.07		0.81		33		1.283		1.287
09:38	3.3		113		1.4		1.13		0.81		36		1.311		1.469
09:40	3.5		112		1.48		1.22		0.82		38		1.41		1.483
09:42	3.2		112		1.38		1.15		0.84		37		1.377		1.457
09:45	2.7		113		1.13		0.97		0.86		30		1.625		1.678
09:48	3.7		113		1.59		1.26		0.8		39		1.374		1.333
09:50	3.4		116		1.45		1.16		0.8		38		1.284		1.493
09:52	3.4		116		1.44		1.18		0.82		38		1.411		1.458
09:54	3.3		116		1.39		1.14		0.82		36		1.35		1.451
09:56	3.5		117		1.49		1.23		0.83		39		1.36		1.385
09:59	3.4		117		1.44		1.23		0.86		39		1.511		1.665
10:01	3.4		116		1.45		1.25		0.86		40		1.602		1.716
10:03	2.8		116		1.21		1.02		0.85		31		1.242		1.408
10:06	3.3		117		1.39		1.17		0.84		36		1.487		1.539
10:08	3.4		117		1.43		1.22		0.85		37		1.559		1.706
10:11	3.3		117		1.42		1.19		0.84		37		1.447		1.552
10:13	2.8		117		1.21		0.99		0.82		29		1.319		1.445
10:16	3.5		116		1.49		1.28		0.86		39		1.939		2.222
10:19	3.4		116		1.43		1.21		0.84		37		1.417		1.438
10:21	3.5		117		1.5		1.26		0.84		39		1.4		1.442
10:23	3.6		117		1.54		1.31		0.85		42		1.517		1.631
10:25	3.5		118		1.51		1.3		0.86		41		1.492		1.521
10:27	3.5		118		1.51		1.3		0.86		42		1.484		1.593
10:29	3.6		118		1.52		1.31		0.86		41		1.441		1.5
10:32	2.9		118		1.22		1.06		0.87		32		1.466		1.664
10:34	3.3		117		1.42		1.21		0.85		37		1.384		1.494
10:37	3.4		117		1.43		1.21		0.84		36		1.449		1.555
10:41	3.2		117		1.37		1.23		0.89		35		2.404		2.584
10:44	3.1		117		1.32		1.09		0.83		31		1.421		1.457
10:46	3.4		117		1.46		1.19		0.81		36		1.43		1.561
10:49	3.4		117		1.45		1.19		0.82		35		1.484		1.59
10:51	3.4		115		1.47		1.21		0.83		36		1.491		1.632
10:54	3.2		115		1.38		1.16		0.84		36		1.465		1.673
10:56	3.4		117		1.44		1.21		0.84		36		1.418		1.514
10:58	3.6		117		1.53		1.28		0.84		39		1.419		1.494
11:01	3		118		1.29		1.08		0.84		32		1.421		1.597
11:03	3.3		118		1.42		1.19		0.84		36		1.384		1.543
11:06	3.8		120		1.6		1.36		0.85		41		1.564		1.587
11:09	3.3		120		1.42		1.26		0.89		37		1.917		2.151
11:11	3.6		120		1.55		1.34		0.86		41		1.492		1.454
11:13	3.3		120		1.41		1.23		0.87		37		1.439		1.687
11:16	3.7		118		1.57		1.37		0.87		41		1.567		1.557
11:18	3.3		118		1.4		1.22		0.87		37		1.39		1.582
11:20	3.6		118		1.54		1.36		0.88		41		1.622		1.678
11:23	3.8		118		1.61		1.48		0.92		45		2.267		2.35
11:26	3.2		118		1.34		1.2		0.9		36		1.494		1.547
11:28	3.5		118		1.47		1.29		0.87		40		1.417		1.438
11:30	3.6		120		1.51		1.34		0.88		42		1.426		1.531
11:32	3.3		120		1.41		1.25		0.89		37		1.551		1.668
11:35	3.4		115		1.46		1.27		0.87		38		1.481		1.586
11:37	3.2		115		1.35		1.17		0.87		35		1.457		1.648
11:40	3.9		117		1.67		1.43		0.86		42		1.607		1.624
11:43	3.6		117		1.53		1.41		0.92		42		2.386		2.558
11:45	3.4		120		1.46		1.3		0.89		40		1.508		1.575
11:47	3.4		120		1.46		1.3		0.89		40		1.415		1.52
11:50	3.6		118		1.53		1.35		0.89		41		1.529		1.554
11:52	3.5		118		1.47		1.31		0.89		39		1.525		1.632
11:54	3.7		120		1.56		1.37		0.88		40		1.598		1.663
11:57	3.6		120		1.54		1.37		0.89		41		1.653		1.815
11:59	3.3		121		1.39		1.23		0.88		36		1.508		1.672
12:02	3.7		121		1.56		1.36		0.87		40		1.551		1.657
12:05	3.7		122		1.58		1.46		0.92		43		2.288		2.428
12:07	3.6		122		1.53		1.34		0.88		40		1.481		1.496
12:09	3.7		122		1.58		1.38		0.87		42		1.462		1.63
12:11	3.8		123		1.64		1.46		0.89		45		1.605		1.707
12:14	3.6		123		1.52		1.38		0.91		42		1.683		1.789
12:16	3.6		125		1.52		1.41		0.93		42		2.02		2.183
12:19	3		125		1.28		1.15		0.9		33		1.64		1.61
12:22	3.9		125		1.67		1.41		0.84		40		1.519		1.656
12:24	4		126		1.69		1.52		0.9		44		2.076		2.272
12:27	3.8		126		1.6		1.42		0.88		41		1.657		1.721
12:29	3.9		126		1.66		1.46		0.88		43		1.556		1.685
12:31	3.9		126		1.66		1.47		0.88		43		1.556		1.615
12:35	3.4		125		1.44		1.37		0.95		38		2.373		2.637
12:37	3.4		125		1.43		1.25		0.88		36		1.415		1.534
12:40	4		123		1.7		1.48		0.87		40		1.68		1.736
12:42	3.7		123		1.58		1.38		0.87		38		1.632		1.779
12:45	4		123		1.72		1.51		0.88		44		1.61		1.757
12:47	4.4		123		1.85		1.67		0.9		48		1.735		1.81
12:49	3.9		123		1.67		1.53		0.91		45		1.555		1.777
12:51	4.3		125		1.84		1.71		0.93		50		1.499		1.609
12:53	4		125		1.71		1.65		0.96		48		1.684		1.887
12:55	3.9		126		1.66		1.6		0.97		47		1.62		1.777
12:57	4		126		1.71		1.64		0.96		46		1.691		1.817
12:59	4		126		1.7		1.64		0.97		47		1.622		1.804
13:01	4.2		129		1.77		1.7		0.96		49		1.603		1.727
13:03	4.3		129		1.83		1.76		0.96		51		1.614		1.693
13:05	4.2		129		1.78		1.74		0.98		49		1.679		1.838
13:07	4.1		129		1.75		1.72		0.98		49		1.641		1.827
13:09	3.8		129		1.63		1.6		0.98		47		1.777		1.854
13:11	4		129		1.71		1.66		0.97		50		1.733		1.884
13:13	4		129		1.69		1.66		0.98		50		1.697		1.892
13:16	4.1		129		1.72		1.74		1.01		50		1.932		2.099
13:17	3.9		129		1.64		1.63		1		49		1.492		1.653
13:20	4		129		1.71		1.67		0.98		46		1.645		1.71
13:22	4.4		129		1.88		1.85		0.98		53		1.735		1.869
13:24	4.4		129		1.88		1.94		1.03		58		2.332		2.593
13:26	3.9		130		1.64		1.69		1.03		50		1.637		1.9
13:28	4.3		130		1.85		1.85		1		53		1.686		1.607
13:30	4.2		131		1.81		1.81		1		51		1.721		1.893
13:32	4.1		131		1.75		1.73		0.99		48		1.802		1.915
13:34	4.1		133		1.75		1.73		0.99		49		1.627		1.857
13:37	4.6		133		1.95		2		1.03		58		2.29		2.419
13:39	4.1		133		1.76		1.79		1.02		52		1.809		1.949
13:41	3.9		133		1.67		1.69		1.01		50		1.679		1.798
13:43	4.2		133		1.78		1.89		1.06		55		2.472		2.665
13:46	3.6		133		1.54		1.55		1.01		46		1.683		1.795
13:47	4		133		1.7		1.66		0.98		50		1.547		1.633
13:49	4.2		131		1.79		1.78		1		52		1.578		1.778
13:51	4.5		131		1.93		1.94		1.01		58		1.76		1.757
13:53	4.2		131		1.8		1.82		1.02		55		1.719		1.886
13:55	4		133		1.7		1.78		1.04		54		1.728		1.885
13:57	3.8		133		1.61		1.71		1.06		51		1.773		1.86
13:59	4.1		133		1.74		1.78		1.02		52		1.717		1.87
14:01	4.1		134		1.75		1.76		1		51		1.744		1.86
14:03	4.3		134		1.83		1.83		1		53		1.91		2.089
14:05	4.3		134		1.82		1.82		1		52		1.651		1.969
14:07	4.7		134		2		2		1		57		1.828		1.775
14:09	4.4		134		1.86		1.88		1.01		57		1.637		1.87
14:11	4.4		137		1.87		1.97		1.06		57		2.502		2.615
14:13	4.1		137		1.75		1.79		1.02		51		1.726		1.863
14:15	4.4		137		1.86		1.86		1		54		1.639		1.778
14:17	4.5		137		1.91		1.95		1.02		56		1.669		1.885
14:19	4.7		137		1.98		2.01		1.02		58		1.781		1.882
14:21	4.3		137		1.84		1.87		1.02		54		1.754		1.948
14:23	4.4		137		1.87		1.9		1.02		54		1.729		1.86
14:25	4.4		139		1.89		1.95		1.03		56		1.797		2.033
14:27	4.2		139		1.79		1.82		1.01		49		1.726		1.824
14:29	4.3		139		1.84		1.85		1.01		52		1.828		1.987
14:31	4.4		139		1.85		1.86		1		50		1.88		2.029
14:34	4.1		139		1.75		1.77		1.01		48		1.962		2.242
14:36	4.3		139		1.83		1.84		1		52		1.767		1.91
14:38	4.5		139		1.93		1.96		1.01		55		1.813		2.021
14:40	4.6		139		1.96		2.03		1.04		55		1.938		2.096
14:41	4.4		139		1.86		1.93		1.04		57		1.671		1.96
14:43	4.7		139		1.99		2.08		1.04		60		1.909		1.917
14:45	4.5		139		1.9		2		1.06		58		1.843		2.045
14:47	4.3		139		1.83		1.93		1.06		54		1.641		1.858
14:50	4.2		141		1.79		1.93		1.08		54		2.37		2.455
14:52	4.4		141		1.86		1.92		1.04		54		1.789		1.874
14:54	4.4		141		1.89		1.94		1.03		54		1.73		1.908
14:56	4.7		141		1.99		2.07		1.04		58		1.934		2.056
14:57	4.4		141		1.89		1.95		1.03		55		1.692		1.914
14:59	4.6		141		1.97		2.05		1.04		58		1.816		1.962
15:01	4.6		141		1.97		2.07		1.05		59		1.781		1.974
15:03	4.4		141		1.89		2.02		1.07		60		1.677		1.966
15:05	4.8		141		2.04		2.2		1.08		63		1.924		1.973
15:06	4.6		141		1.94		2.08		1.07		60		1.769		1.964
15:08	4.4		141		1.88		2.06		1.1		62		1.701		1.961
15:10	3.9		141		1.67		1.86		1.12		56		1.671		1.943
15:12	4		141		1.68		1.82		1.08		50		1.837		1.848
15:14	4.3		141		1.83		1.95		1.07		55		1.761		2.093
15:16	4.4		142		1.87		2.08		1.11		60		2.338		2.551
15:18	3.9		142		1.66		1.85		1.11		58		1.67		1.846
15:20	4.2		146		1.77		1.96		1.11		59		1.773		1.84
15:22	4.5		146		1.92		2.09		1.09		63		1.765		1.996
15:23	4.2		146		1.8		1.96		1.09		56		1.779		1.952
15:25	4.4		146		1.85		2.02		1.09		58		1.879		2.091
15:27	4.3		146		1.84		1.99		1.08		57		1.811		1.95
15:29	4.4		146		1.89		2.05		1.08		58		1.842		2.097
15:31	4.6		146		1.97		2.16		1.09		62		2.202		2.214
15:33	4.1		146		1.74		1.86		1.07		52		1.668		2.009
15:35	4.8		146		2.03		2.19		1.08		66		1.69		1.912
15:36	4.9		146		2.07		2.28		1.1		70		1.773		1.937
15:38	4.5		146		1.91		2.14		1.12		67		1.876		1.931
15:40	4.4		146		1.86		2.09		1.12		65		1.772		1.96
15:41	3.9		146		1.66		1.87		1.13		57		1.735		1.988
15:43	4.3		146		1.82		2.04		1.12		62		1.554		1.683
15:45	4		148		1.71		1.88		1.1		55		1.838		1.911
15:47	4.6		148		1.95		2.14		1.1		65		1.758		1.93
15:48	3.9		148		1.66		1.82		1.1		55		1.709		1.813
15:50	4.9		148		2.08		2.31		1.11		66		1.945		2.034
15:52	4.6		148		1.98		2.19		1.11		68		1.735		1.906
15:53	4.3		148		1.85		2.06		1.12		65		1.723		1.947
15:55	4.6		146		1.95		2.18		1.12		63		1.924		1.989
15:57	4.5		146		1.93		2.16		1.12		68		1.78		2.013
15:59	4.3		146		1.83		2.1		1.15		61		2.398		2.589
16:01	4.4		146		1.87		2.09		1.12		64		1.768		1.928
16:02	4.3		146		1.83		2.02		1.1		60		1.622		1.799
16:04	4.6		146		1.96		2.2		1.12		67		1.885		2.126
16:06	4.6		148		1.96		2.21		1.12		68		1.774		1.871
16:07	4.8		148		2.03		2.3		1.13		71		1.852		2.026
16:09	4.6		150		1.97		2.29		1.16		68		2.289		2.362
16:11	4.3		150		1.82		2.07		1.14		65		1.645		1.891
16:12	4.1		150		1.76		2.01		1.14		61		1.643		1.833
16:14	4.7		150		1.98		2.25		1.13		67		1.811		1.906
16:16	4.3		151		1.81		2.06		1.14		62		1.856		2.063
16:17	4.7		151		2		2.28		1.14		71		1.868		2.054
16:19	4.8		153		2.02		2.36		1.17		71		2.15		2.263
16:21	4.4		153		1.86		2.14		1.15		61		1.924		2.093
16:23	4.5		153		1.92		2.18		1.14		63		1.835		1.998
16:24	4.9		153		2.1		2.41		1.15		74		1.941		2.12
16:26	4.9		153		2.08		2.4		1.15		75		1.787		1.912
16:27	4.5		153		1.93		2.24		1.16		67		1.809		2.031
16:27	Recovery
16:29	4.4		153		1.89		2.28		1.21		71		2.285		2.568
16:31	4.6		153		1.97		2.36		1.19		74		1.885		2.004
16:33	4.1		153		1.74		2.1		1.21		66		1.822		2.079
16:34	4.3		155		1.82		2.17		1.2		69		1.777		1.942
16:36	4.4		155		1.85		2.18		1.18		69		1.676		1.788
16:37	4.5		155		1.93		2.26		1.17		71		1.732		1.822
16:39	4.6		155		1.98		2.36		1.19		71		2.358		2.516
16:41	4.2		153		1.79		2.05		1.15		61		1.696		1.841
16:42	4.4		153		1.85		2.09		1.13		64		1.57		1.808
16:44	4.1		153		1.76		2		1.14		62		1.534		1.767
16:46	4.6		155		1.96		2.31		1.18		70		2.259		2.386
16:48	2.7		155		1.16		1.33		1.14		41		1.631		1.813
16:50	5.2		153		2.23		2.29		1.03		63		1.64		1.671
16:51	4.6		153		1.96		2.05		1.05		59		1.524		1.793
16:53	5		153		2.15		2.28		1.06		68		1.715		1.769
16:54	5		151		2.12		2.33		1.1		67		1.986		2.123
16:56	4.7		151		1.99		2.2		1.11		64		1.881		2.072
16:58	4.2		151		1.81		2.02		1.12		58		1.894		1.991
17:00	4.3		146		1.85		2.07		1.12		60		1.845		2.218
17:02	4.5		146		1.91		2.11		1.1		61		1.913		1.845
17:04	4		146		1.71		1.87		1.1		54		1.802		2.023
17:06	3.6		142		1.54		1.66		1.08		49		1.671		1.853
17:08	3		142		1.26		1.37		1.09		42		1.227		1.606
17:12			139						1.1				1.1		1.72
17:28			136
17:44			133
17:59			127
18:15			122
18:31			121
18:47			116
19:02			114
19:18			116
19:34			111
19:50			108
20:05			103
20:21			102
20:37			97
	3.4475	0.745676	120.981	339.606	1.46742	0.134935	1.38581	0.264032	0.91856	0.0164651	42.2333	197.589	1.50829	0.131979	1.61768	0.168164
	METS						HR						VO2						VCO2						RER						VE						Vtex						Vtin						LABEL
	Rest		Test		Recovery		Rest		Test		Recovery		Rest		Test		Recovery		Rest		Test		Recovery		Rest		Test		Recovery		Rest		Test		Recovery		Rest		Test		Recovery		Rest		Test		Recovery
	MEDIA	VAR	MEDIA	VAR	MEDIA	VAR	MEDIA	VAR	MEDIA	VAR	MEDIA	VAR	MEDIA	VAR	MEDIA	VAR	MEDIA	VAR	MEDIA	VAR	MEDIA	VAR	MEDIA	VAR	MEDIA	VAR	MEDIA	VAR	MEDIA	VAR	MEDIA	VAR	MEDIA	VAR	MEDIA	VAR	MEDIA	VAR	MEDIA	VAR	MEDIA	VAR	MEDIA	VAR	MEDIA	VAR	MEDIA	VAR	BIN
	1.04375	0.094625	3.38902	0.721159	4.30435	0.334071	84	4.93333	119.05	301.858	138.568	348.586	0.444375	0.0160662	1.44226	0.130197	1.83609	0.0616249	0.395625	0.0129462	1.33872	0.242065	2.07565	0.080053	0.892353	0.00119412	0.903412	0.0139964	1.13125	0.00268098	14.4375	12.7958	40.8605	176.358	62.3478	78.9644	0.857294	0.22309	1.48982	0.130509	1.76762	0.0840064	0.9605	0.178818	1.59336	0.16683	1.95908	0.0646746	1
	1.04375	0.094625	3.38902	0.721159	4.30435	0.334071	84	4.93333	119.05	301.858	138.568	348.586	0.444375	0.0160662	1.44226	0.130197	1.83609	0.0616249	0.395625	0.0129462	1.33872	0.242065	2.07565	0.080053	0.892353	0.00119412	0.903412	0.0139964	1.13125	0.00268098	14.4375	12.7958	40.8605	176.358	62.3478	78.9644	0.857294	0.22309	1.48982	0.130509	1.76762	0.0840064	0.9605	0.178818	1.59336	0.16683	1.95908	0.0646746	1
[truncated: 1 more columns]
