# Supplementary material for: On the development of diagnostic support algorithms based on CPET biosignals data via machine learning and wavelets
Source: PeerJ journal article supplement (doi:10.7717/peerj-cs.2474), 2025-01-30
Supplement: raw_data.zip [file Subject21_BxB.xlsx]

## Sheet: Demographics
Gender:	female
Age:	58
Height (cm):	162
Weight (kg):	101
BMI:	38
Condition:	Metabolic Syndrome

## Sheet: Subject21_BxB
Time	METS		HR		V'O2		V'CO2		RER		V'E		VTex		VTin
min			1/min		L/min		L/min				L/min		L		L
00:00	Rest
00:44
00:59			80
01:15			75
01:19	1.9		75		0.69		0.56		0.81		18		1.071		0.813
01:22	1.8		77		0.65		0.56		0.86		22		1.06		1.074
01:26	1		77		0.34		0.3		0.89		13		0.944		0.969
01:29	1.1		76		0.38		0.34		0.89		14		0.774		0.824
01:31	2.5		76		0.89		0.77		0.87		31		0.781		0.714
01:34	1.9		76		0.67		0.62		0.93		24		1.258		1.21
01:35	1.4		75		0.51		0.47		0.93		23		0.593		0.66
01:38	0.9		75		0.31		0.27		0.87		12		0.627		0.511
01:40	0.4		78		0.14		0.12		0.83		8		0.236		0.424
01:43	0.8		78		0.28		0.23		0.83		10		0.462		0.539
01:47	1.2		81		0.42		0.35		0.84		14		0.769		0.856
01:49	1.3		81		0.44		0.37		0.83		14		0.633		0.658
01:52	1.4		78		0.48		0.39		0.82		16		0.647		0.624
01:54	1.2		78		0.43		0.35		0.82		15		0.524		0.556
01:56	1.6		75		0.57		0.48		0.84		19		0.797		0.746
01:59	1.6		75		0.58		0.5		0.85		20		0.753		0.748
01:59	Test
02:00	1.1		74		0.39		0.32		0.82		16		0.327		0.36
02:02	1.2		74		0.41		0.36		0.87		15		0.67		0.787
02:05	0.9		76		0.32		0.27		0.86		12		0.535		0.668
02:07	1		76		0.36		0.31		0.85		13		0.487		0.492
02:10	1.1		77		0.38		0.32		0.85		14		0.574		0.631
02:12	1.3		77		0.45		0.37		0.83		15		0.57		0.557
02:14	1.3		77		0.45		0.38		0.85		16		0.632		0.695
02:17	1		77		0.36		0.31		0.86		14		0.524		0.686
02:19	1.4		77		0.48		0.41		0.85		17		0.669		0.574
02:21	1.9		76		0.66		0.57		0.86		22		0.857		0.813
02:26	1.6		79		0.56		0.48		0.86		17		1.216		1.321
02:30	1.2		97		0.43		0.34		0.79		13		0.838		0.68
02:32	0.6		97		0.22		0.16		0.74		9		0.329		0.507
02:35	1.2		98		0.41		0.31		0.75		12		0.594		0.717
02:37	1.5		98		0.54		0.41		0.77		17		0.734		0.852
02:40	1.6		86		0.58		0.44		0.77		17		0.724		0.656
02:43	1.3		86		0.48		0.39		0.82		17		0.735		0.903
02:45	1.6		83		0.57		0.45		0.79		18		0.692		0.545
02:47	1.4		83		0.5		0.39		0.78		16		0.558		0.516
02:49	0.9		83		0.33		0.26		0.79		12		0.455		0.572
02:51	1.1		80		0.38		0.31		0.8		14		0.543		0.649
02:54	1		80		0.35		0.28		0.81		13		0.574		0.653
02:56	1		79		0.34		0.27		0.79		13		0.434		0.555
03:00	1.7		80		0.62		0.52		0.84		20		1.392		1.412
03:03	0.6		80		0.22		0.17		0.8		9		0.367		0.363
03:05	0.5		81		0.18		0.14		0.78		8		0.32		0.428
03:08	0.6		81		0.22		0.17		0.76		9		0.353		0.401
03:11	1.7		82		0.59		0.47		0.79		18		0.976		0.999
03:13	0.9		82		0.31		0.24		0.77		11		0.45		0.518
03:16	1		82		0.36		0.27		0.76		12		0.532		0.63
03:18	0.6		82		0.22		0.17		0.75		9		0.357		0.47
03:21	1.3		82		0.47		0.35		0.75		14		0.575		0.594
03:23	1.3		82		0.46		0.34		0.75		14		0.64		0.675
03:25	2.2		81		0.79		0.56		0.71		20		0.61		0.401
03:28	1.8		81		0.65		0.5		0.77		19		0.951		1.08
03:31	1.2		86		0.44		0.34		0.79		15		0.693		0.895
03:33	0.1		86		0.03		0.02		0.84		3		0.113		0.569
03:36	2.1		90		0.76		0.57		0.75		21		0.795		0.376
03:39	1.8		91		0.63		0.46		0.73		15		0.956		1.211
03:42	2.6		92		0.92		0.65		0.71		20		1.023		0.823
03:45	2.6		99		0.93		0.64		0.69		22		0.924		0.847
03:47	2.5		99		0.9		0.63		0.7		22		0.915		0.987
03:50	3.1		94		1.1		0.8		0.73		29		1.197		1.222
03:53	2.5		94		0.88		0.68		0.77		25		1.126		1.186
03:58	2.6		90		0.91		0.78		0.85		28		2.371		2.286
04:01	1.9		88		0.69		0.57		0.83		20		1.261		1.451
04:05	2.4		87		0.84		0.68		0.8		23		1.216		1.309
04:07	2		87		0.71		0.54		0.76		21		0.73		0.8
04:08	1.6		87		0.55		0.41		0.74		18		0.505		0.679
04:10	2.3		88		0.83		0.57		0.69		20		0.671		0.533
04:12	2.4		88		0.85		0.58		0.68		21		0.676		0.796
04:14	3.5		91		1.23		0.84		0.69		29		1		1.008
04:16	3		91		1.06		0.74		0.7		27		0.957		0.988
04:19	2.5		91		0.88		0.59		0.67		21		0.727		0.766
04:21	2.5		93		0.9		0.6		0.67		22		0.8		0.894
04:23	2.2		93		0.79		0.51		0.65		19		0.725		0.79
04:26	2.9		95		1.01		0.67		0.66		23		0.96		1.123
04:28	2.8		95		0.99		0.66		0.67		23		0.967		1.11
04:31	2.9		96		1.01		0.69		0.69		24		1.106		1.25
04:33	3.8		96		1.34		0.92		0.69		32		1.398		1.366
04:36	4		97		1.4		0.99		0.7		33		1.438		1.403
04:39	3.1		97		1.09		0.78		0.71		27		1.152		1.216
04:41	3.1		98		1.08		0.79		0.73		26		1.259		1.376
04:45	3.4		99		1.19		0.9		0.76		30		1.586		1.706
04:47	2.8		99		1.01		0.72		0.72		25		0.973		1.008
04:50	3		99		1.05		0.75		0.72		25		1.086		1.177
04:52	3.4		99		1.21		0.86		0.71		28		1.286		1.351
04:55	3.4		99		1.21		0.85		0.7		28		1.106		1.141
04:57	3.5		99		1.23		0.9		0.73		29		1.275		1.417
05:00	3		101		1.05		0.75		0.72		26		1.027		1.067
05:05	2		101		0.72		0.51		0.71		16		1.383		1.6
05:07	4.1		101		1.46		1.01		0.69		31		1.244		1.37
05:10	3.8		99		1.33		0.96		0.72		32		1.335		1.437
05:12	3.6		99		1.28		0.95		0.74		32		1.303		1.424
05:15	2.9		99		1.02		0.77		0.76		27		1.165		1.314
05:17	2.9		99		1.01		0.74		0.73		25		0.991		0.982
05:19	3.2		101		1.14		0.82		0.72		27		1.002		1.015
05:22	3.8		101		1.34		0.98		0.73		32		1.256		1.368
05:24	2.9		101		1.02		0.78		0.77		27		1.249		1.503
05:27	4		101		1.42		1.08		0.76		35		1.444		1.384
05:29	3.2		101		1.12		0.86		0.77		29		1.158		1.247
05:32	3.6		101		1.26		0.98		0.78		33		1.306		1.373
05:34	3.5		101		1.22		0.96		0.79		33		1.247		1.338
05:36	3.3		101		1.18		0.95		0.8		33		1.222		1.369
05:38	3.1		101		1.11		0.87		0.79		31		0.997		1.036
05:40	3.1		102		1.08		0.85		0.79		30		1.005		1.114
05:42	3		102		1.07		0.83		0.78		28		1.002		1.041
05:45	2.8		103		1		0.77		0.78		26		1.019		1.108
05:47	3.3		103		1.17		0.91		0.77		30		1.149		1.226
05:49	3.6		105		1.27		1		0.78		33		1.245		1.317
05:51	3.8		105		1.33		1.04		0.78		35		1.189		1.167
05:54	2.9		105		1.04		0.86		0.83		31		1.168		1.453
05:56	2.7		106		0.94		0.78		0.82		26		1.186		1.313
05:59	3.6		106		1.27		1.01		0.79		33		1.231		1.163
06:01	3.5		106		1.25		1.04		0.83		33		1.575		1.67
06:04	3.2		106		1.15		0.95		0.82		32		1.216		1.31
06:06	3.2		104		1.14		0.91		0.8		31		1.084		1.141
06:10	3.7		106		1.32		1.16		0.88		37		2.447		2.566
06:12	2.9		106		1.01		0.84		0.83		30		0.96		1.071
06:13	2.9		106		1.01		0.8		0.79		28		0.804		0.769
06:15	3.4		107		1.21		0.96		0.8		32		1.091		1.137
06:18	3.5		107		1.24		1.01		0.82		33		1.365		1.479
06:20	3.2		107		1.13		0.9		0.8		31		1.094		1.135
06:22	2.8		107		1.01		0.8		0.79		28		0.967		1.081
06:24	3.4		107		1.2		0.93		0.78		31		1.065		1.074
06:27	3.5		107		1.25		1		0.8		33		1.395		1.459
06:29	2.9		107		1.01		0.81		0.8		29		1.035		1.181
06:32	2.7		104		0.96		0.77		0.8		25		1.13		1.254
06:34	3.6		104		1.28		1		0.78		32		1.232		1.183
06:37	3.5		103		1.22		0.99		0.82		32		1.598		1.721
06:39	3		105		1.07		0.85		0.8		28		1.096		1.174
06:42	3.4		105		1.19		0.93		0.78		30		1.067		1.073
06:44	3.2		105		1.11		0.88		0.79		28		1.195		1.339
06:46	3.5		105		1.23		0.93		0.75		30		0.991		0.956
06:48	3.5		105		1.24		0.94		0.76		31		1.095		1.13
06:50	3.7		106		1.32		1.03		0.78		34		1.229		1.328
06:53	3.4		106		1.22		0.98		0.8		33		1.265		1.38
06:55	3		108		1.04		0.86		0.83		29		1.271		1.464
06:58	3.6		108		1.26		1		0.8		32		1.213		1.207
07:00	3.4		106		1.21		0.96		0.79		32		1.096		1.182
07:02	3.6		106		1.29		1.05		0.82		34		1.489		1.582
07:05	3.5		107		1.24		1.01		0.82		33		1.282		1.296
07:07	3.1		107		1.09		0.88		0.81		30		1.1		1.212
07:09	3.3		107		1.17		0.93		0.8		30		1.103		1.15
07:11	3.9		108		1.37		1.11		0.81		36		1.351		1.369
07:13	3.4		108		1.19		0.97		0.81		33		1.123		1.229
07:16	3.4		108		1.2		0.99		0.82		33		1.209		1.364
07:18	3		108		1.07		0.88		0.82		29		1.041		1.163
07:20	2		108		0.7		0.57		0.81		20		0.811		1.114
07:22	3.9		108		1.37		1.04		0.76		31		1.149		1.012
07:24	3.7		107		1.32		1		0.76		32		1.086		1.161
07:27	3.7		107		1.3		1.01		0.77		33		1.152		1.287
07:29	3.4		106		1.19		0.94		0.79		27		1.213		1.457
07:31	4.2		106		1.47		1.19		0.81		40		1.344		1.411
07:33	3.5		106		1.23		1		0.81		34		1.146		1.218
07:35	3.6		108		1.26		1.03		0.82		34		1.103		1.222
07:37	3.4		108		1.19		0.97		0.82		33		1.103		1.216
07:39	3.1		109		1.1		0.91		0.83		31		1.106		1.285
07:42	3.5		109		1.23		1		0.81		32		1.187		1.14
07:44	3.1		109		1.11		0.89		0.81		29		1.044		1.145
07:46	3.8		111		1.35		1.08		0.8		35		1.18		1.215
07:48	4.1		111		1.43		1.17		0.81		39		1.248		1.319
07:50	3.7		112		1.31		1.1		0.84		37		1.327		1.457
07:52	2.9		112		1.02		0.86		0.84		31		1.046		1.19
07:54	3		112		1.05		0.86		0.82		29		1.031		1.083
07:56	3.7		110		1.32		1.06		0.8		33		1.183		1.189
07:58	3.3		110		1.17		0.95		0.81		32		1.105		1.288
08:00	3.8		110		1.34		1.07		0.8		34		1.255		1.274
08:02	4.1		110		1.44		1.14		0.79		36		1.267		1.275
08:05	4		110		1.43		1.15		0.8		37		1.296		1.372
08:06	4		110		1.4		1.15		0.82		39		1.227		1.324
08:08	3.9		110		1.36		1.14		0.84		39		1.183		1.283
08:11	2.5		110		0.9		0.74		0.83		25		1.215		1.206
08:13	4.6		110		1.62		1.29		0.79		40		1.337		1.319
08:16	3.9		112		1.38		1.19		0.86		38		1.991		2.242
08:18	3.8		112		1.35		1.15		0.85		38		1.317		1.396
08:20	3.4		114		1.2		1		0.84		33		1.131		1.155
08:23	4		114		1.41		1.19		0.84		38		1.307		1.353
08:24	3.8		112		1.33		1.1		0.83		37		1.17		1.255
08:27	3.9		112		1.38		1.18		0.85		38		1.344		1.43
08:29	3.7		112		1.31		1.12		0.85		36		1.277		1.373
08:31	3.7		111		1.32		1.14		0.86		37		1.371		1.473
08:33	4.1		111		1.46		1.26		0.86		41		1.499		1.527
08:35	3.8		114		1.35		1.15		0.85		37		1.255		1.329
08:37	3.9		114		1.38		1.18		0.85		37		1.291		1.351
08:39	3.1		114		1.08		0.86		0.8		28		0.79		0.86
08:41	3.9		114		1.39		1.13		0.81		36		1.187		1.271
08:43	4.2		114		1.47		1.27		0.86		41		1.733		1.888
08:46	3.6		114		1.27		1.1		0.87		37		1.358		1.485
08:48	3.5		114		1.24		1.06		0.86		34		1.214		1.267
08:50	3.9		115		1.39		1.18		0.85		36		1.478		1.45
08:52	3.9		115		1.38		1.15		0.83		37		1.262		1.331
08:54	4.1		116		1.46		1.22		0.83		39		1.313		1.384
08:56	4.3		116		1.51		1.29		0.86		42		1.432		1.549
08:58	3.8		116		1.35		1.17		0.87		39		1.241		1.337
09:00	3.5		121		1.23		1.07		0.87		35		1.267		1.385
09:02	3.8		121		1.33		1.15		0.86		38		1.238		1.338
09:04	4		118		1.42		1.2		0.85		38		1.266		1.242
09:07	4.2		118		1.5		1.3		0.87		42		1.509		1.624
09:09	3.9		118		1.38		1.2		0.87		39		1.424		1.524
09:11	3.8		116		1.35		1.19		0.88		39		1.391		1.519
09:13	3.8		116		1.33		1.16		0.87		39		1.318		1.402
09:15	3.4		116		1.19		1.03		0.86		34		1.153		1.258
09:17	4		116		1.4		1.2		0.85		38		1.27		1.32
09:19	3.9		116		1.39		1.2		0.87		39		1.365		1.463
09:21	3.9		116		1.36		1.19		0.87		39		1.337		1.448
09:23	4.1		116		1.46		1.27		0.87		40		1.449		1.502
09:25	3.8		116		1.33		1.16		0.88		38		1.371		1.439
09:27	3.3		116		1.17		0.99		0.85		32		1.147		1.211
09:29	4.1		120		1.46		1.2		0.82		38		1.251		1.209
09:33	4.2		120		1.48		1.3		0.88		39		2.061		2.262
09:35	3.6		120		1.28		1.11		0.87		36		1.351		1.547
09:37	4		120		1.4		1.19		0.85		38		1.214		1.278
09:39	3.9		120		1.39		1.19		0.85		36		1.363		1.425
09:41	4.3		118		1.53		1.28		0.84		40		1.293		1.322
09:43	4.5		118		1.61		1.37		0.85		44		1.397		1.453
09:45	3.8		118		1.33		1.15		0.87		38		1.252		1.425
09:47	4.1		118		1.46		1.27		0.87		41		1.306		1.332
09:49	4.1		118		1.44		1.26		0.88		43		1.292		1.39
09:51	3.9		118		1.39		1.23		0.88		40		1.329		1.366
09:53	3.5		118		1.25		1.11		0.89		35		1.31		1.487
09:55	4.2		120		1.47		1.28		0.87		40		1.397		1.382
09:57	4		120		1.43		1.24		0.87		40		1.296		1.441
09:59	4		120		1.4		1.23		0.88		40		1.362		1.438
10:01	3.8		121		1.34		1.17		0.87		39		1.297		1.415
10:03	4.2		121		1.48		1.29		0.87		41		1.514		1.554
10:05	3.7		120		1.31		1.14		0.87		37		1.275		1.427
10:07	4.3		120		1.5		1.31		0.87		41		1.434		1.481
10:09	4.3		120		1.52		1.33		0.88		42		1.559		1.604
10:12	4.2		120		1.47		1.32		0.9		42		1.745		1.839
10:15	4.4		122		1.56		1.47		0.94		46		2.356		2.423
10:18	4		122		1.41		1.31		0.93		41		1.806		1.933
10:20	4.2		122		1.49		1.36		0.91		44		1.53		1.575
10:22	4		122		1.42		1.28		0.9		41		1.416		1.509
10:24	4.3		122		1.52		1.36		0.9		43		1.621		1.68
10:26	4.3		122		1.5		1.38		0.92		43		1.703		1.843
10:29	4		122		1.43		1.31		0.91		42		1.541		1.675
10:31	4.2		123		1.48		1.32		0.89		43		1.382		1.363
10:32	4		123		1.42		1.25		0.88		39		1.243		1.317
10:34	4.1		121		1.45		1.25		0.86		39		1.185		1.215
10:36	4.1		121		1.43		1.26		0.88		40		1.472		1.648
10:39	4.4		121		1.54		1.39		0.9		43		1.742		1.859
10:41	4.2		121		1.48		1.34		0.9		42		1.709		1.771
10:44	4.5		121		1.61		1.47		0.92		47		1.914		1.965
10:47	4.2		125		1.47		1.42		0.97		44		2.349		2.536
10:49	4.3		125		1.52		1.38		0.91		44		1.424		1.412
10:51	4.1		125		1.45		1.35		0.93		42		1.763		1.923
10:54	4.4		125		1.57		1.46		0.93		46		1.975		2.089
10:56	4.6		129		1.64		1.52		0.93		47		1.871		1.885
10:59	4.3		129		1.52		1.41		0.93		45		1.592		1.766
11:01	4.3		130		1.54		1.41		0.92		45		1.507		1.529
11:03	4.3		130		1.52		1.46		0.96		45		2.125		2.29
11:05	4.1		126		1.44		1.3		0.91		42		1.318		1.306
11:07	4.4		126		1.55		1.37		0.88		44		1.262		1.277
11:09	4.5		126		1.6		1.4		0.88		45		1.339		1.359
11:11	4.3		127		1.51		1.33		0.88		43		1.284		1.364
11:13	4.6		127		1.62		1.43		0.89		45		1.485		1.49
11:14	4.1		130		1.43		1.25		0.87		41		1.224		1.295
11:16	4.3		130		1.52		1.38		0.9		44		1.457		1.592
11:18	4.6		130		1.61		1.48		0.92		48		1.636		1.738
11:20	4.3		129		1.52		1.42		0.94		46		1.523		1.591
11:23	4.4		129		1.56		1.45		0.93		46		1.623		1.659
11:25	4.3		129		1.52		1.41		0.93		44		1.52		1.614
11:27	4.3		129		1.52		1.43		0.94		45		1.694		1.803
11:29	4.3		129		1.51		1.43		0.95		46		1.702		1.865
11:31	4		127		1.4		1.31		0.94		44		1.444		1.542
11:33	3.8		127		1.34		1.21		0.9		38		1.218		1.276
11:35	4.6		127		1.62		1.44		0.89		46		1.406		1.42
11:37	3.8		127		1.35		1.2		0.89		38		1.324		1.486
11:39	4.3		127		1.52		1.33		0.88		40		1.301		1.4
11:41	4.7		129		1.68		1.5		0.9		45		1.723		1.825
11:44	4.5		129		1.58		1.51		0.95		45		2.359		2.56
11:46	4		129		1.41		1.3		0.92		41		1.495		1.649
11:48	4.8		129		1.68		1.49		0.89		46		1.458		1.436
11:50	4.6		129		1.62		1.44		0.89		44		1.421		1.499
11:52	4.5		129		1.59		1.44		0.9		45		1.474		1.636
11:54	4.9		129		1.73		1.55		0.89		47		1.47		1.496
11:56	4.7		130		1.66		1.47		0.89		47		1.421		1.489
11:58	4.3		130		1.51		1.37		0.91		44		1.479		1.666
12:00	4.6		130		1.64		1.49		0.91		48		1.459		1.534
12:02	4.5		130		1.6		1.46		0.92		47		1.367		1.445
12:03	4.4		130		1.57		1.45		0.92		47		1.496		1.567
12:05	4.1		131		1.46		1.36		0.93		43		1.453		1.596
12:07	4.7		131		1.67		1.52		0.91		47		1.427		1.462
12:09	4.9		131		1.74		1.62		0.94		51		1.752		1.853
12:11	4.7		131		1.66		1.58		0.95		51		1.765		1.871
12:13	4.5		131		1.59		1.49		0.94		47		1.575		1.581
12:16	4.5		131		1.58		1.49		0.94		46		1.592		1.758
12:18	4.4		131		1.57		1.47		0.93		47		1.526		1.619
12:19	4.5		131		1.58		1.45		0.92		46		1.39		1.485
12:21	4.7		131		1.64		1.52		0.92		49		1.416		1.489
12:23	4.6		131		1.62		1.53		0.94		50		1.642		1.801
12:25	4.7		131		1.65		1.58		0.96		50		1.729		1.791
12:27	4.3		131		1.54		1.46		0.95		45		1.561		1.647
12:29	4.6		134		1.61		1.52		0.94		47		1.626		1.708
12:31	4.6		134		1.63		1.52		0.93		48		1.535		1.587
12:33	4.8		134		1.69		1.59		0.94		48		1.605		1.697
12:35	4.7		133		1.66		1.58		0.96		49		1.906		2.079
12:38	5		133		1.76		1.68		0.96		50		2.005		1.973
12:40	4.6		133		1.64		1.6		0.98		50		2.039		2.207
12:42	4.6		133		1.62		1.56		0.97		50		1.593		1.754
12:44	4.5		133		1.6		1.52		0.95		49		1.418		1.463
12:46	4.7		133		1.66		1.58		0.95		50		1.519		1.532
12:48	4.5		133		1.58		1.53		0.97		47		1.629		1.778
12:50	4.4		134		1.57		1.56		1		49		2.035		2.277
12:52	4.8		134		1.69		1.6		0.95		49		1.559		1.498
12:54	4.8		134		1.69		1.59		0.94		50		1.531		1.58
12:56	4.8		136		1.69		1.62		0.96		50		1.74		1.858
12:58	4.7		136		1.67		1.65		0.98		51		1.96		2.102
13:00	4.5		134		1.58		1.52		0.96		47		1.562		1.634
13:03	4.5		134		1.6		1.6		1		50		2.059		2.33
13:05	4.6		134		1.63		1.59		0.97		49		1.607		1.611
13:07	4.8		134		1.69		1.62		0.96		51		1.695		1.722
13:09	4.5		134		1.6		1.52		0.95		48		1.575		1.644
13:11	4.5		134		1.57		1.49		0.95		49		1.426		1.55
13:13	4.8		134		1.69		1.59		0.94		48		1.623		1.671
13:15	4.8		134		1.7		1.61		0.95		49		1.686		1.773
13:17	4.8		134		1.68		1.63		0.97		50		1.901		2.024
13:19	4.7		134		1.66		1.6		0.97		50		1.681		1.778
13:21	4.7		136		1.65		1.59		0.97		49		1.725		1.84
13:23	4.6		136		1.62		1.54		0.95		48		1.487		1.54
13:25	4.9		136		1.73		1.68		0.97		53		1.832		1.896
13:27	4.3		136		1.51		1.46		0.97		47		1.423		1.589
13:29	4.8		136		1.68		1.6		0.95		49		1.573		1.558
13:31	4.8		137		1.68		1.61		0.96		47		1.739		1.868
13:33	4.9		137		1.73		1.64		0.95		49		1.723		1.734
13:35	4.4		137		1.54		1.47		0.96		45		1.527		1.72
13:37	5.2		137		1.83		1.73		0.95		51		1.815		1.784
13:39	4.9		137		1.72		1.65		0.96		52		1.665		1.836
13:41	5.1		137		1.79		1.73		0.97		56		1.724		1.775
13:43	4.5		137		1.61		1.57		0.98		48		1.683		1.848
13:46	4.6		139		1.63		1.62		1		47		2.148		2.259
13:48	4.3		139		1.51		1.45		0.96		46		1.387		1.56
13:50	4.9		139		1.74		1.66		0.95		48		1.582		1.55
13:52	4.9		139		1.75		1.75		1		55		1.949		2.347
13:53	5.1		139		1.8		1.76		0.98		57		1.548		1.386
13:55	4.3		153		1.52		1.45		0.95		45		1.274		1.316
13:57	4.6		153		1.64		1.58		0.96		50		1.545		1.714
13:59	4.8		153		1.7		1.65		0.97		51		1.615		1.659
14:01	4.8		157		1.69		1.64		0.97		51		1.676		1.752
14:03	4.6		157		1.64		1.59		0.97		49		1.62		1.734
14:05	4.8		139		1.69		1.63		0.97		50		1.648		1.758
14:07	4.7		139		1.65		1.6		0.97		50		1.632		1.754
14:09	5		139		1.75		1.69		0.97		51		1.659		1.708
14:11	5.2		139		1.82		1.77		0.97		54		1.85		1.947
14:13	5.3		139		1.88		1.86		0.99		59		1.899		1.962
14:15	4.7		139		1.66		1.67		1.01		53		1.784		1.965
14:17	4.8		139		1.69		1.68		0.99		52		1.685		1.792
14:19	5.1		139		1.8		1.83		1.02		57		2.137		2.235
14:21	4.8		142		1.7		1.69		1		53		1.683		1.804
14:23	5		142		1.76		1.73		0.98		52		1.73		1.766
14:25	5.3		144		1.88		1.86		0.99		57		1.893		1.965
14:27	5.2		144		1.83		1.82		0.99		56		1.762		1.844
14:29	5.4		144		1.91		1.95		1.02		59		2.283		2.402
14:31	4.9		146		1.72		1.71		0.99		54		1.645		1.741
14:33	5.3		146		1.88		1.93		1.03		59		2.262		2.377
14:35	5.2		148		1.82		1.87		1.03		57		1.968		2.077
14:37	5		148		1.78		1.79		1.01		56		1.73		1.783
14:39	5		148		1.78		1.82		1.03		55		1.98		2.177
14:41	5.2		148		1.84		1.9		1.03		59		2.141		2.192
14:44	5.1		148		1.81		1.83		1.01		55		1.931		1.948
14:45	5.1		150		1.8		1.81		1.01		57		1.696		1.862
14:47	5.3		150		1.87		1.88		1		57		1.652		1.667
14:50	5		150		1.75		1.85		1.06		54		2.426		2.674
14:52	5.3		150		1.88		1.92		1.02		56		1.94		1.962
14:54	4.9		150		1.74		1.76		1.01		53		1.702		1.822
14:56	5.1		150		1.8		1.81		1.01		54		1.717		1.838
14:57	5.2		150		1.86		1.85		0.99		56		1.686		1.697
14:59	5.3		150		1.89		1.9		1.01		57		1.766		1.838
15:01	5.4		150		1.91		2		1.05		62		2.217		2.434
15:03	5.2		150		1.84		1.94		1.06		61		2.007		2.137
15:05	5.1		148		1.8		1.89		1.05		60		1.857		1.924
15:07	5.3		148		1.88		1.9		1.01		59		1.638		1.615
15:09	5		148		1.75		1.81		1.03		56		1.74		1.903
15:11	5.3		150		1.86		1.89		1.02		57		1.748		1.883
15:12	5.7		150		2.02		2.04		1.01		62		1.854		1.818
15:14	5.5		150		1.95		2.02		1.04		63		2.126		2.282
15:16	5.5		150		1.94		2.04		1.05		65		2.138		2.237
15:18	5.3		150		1.88		1.97		1.05		62		1.89		1.968
15:20	5		151		1.76		1.84		1.04		55		1.782		1.918
15:22	5.3		151		1.89		1.93		1.02		59		1.778		1.835
15:24	5.5		151		1.94		2.05		1.05		63		2.284		2.38
15:26	5.4		151		1.9		1.99		1.05		62		2.01		2.09
15:28	5		151		1.78		1.84		1.03		56		1.817		1.842
15:30	4.8		151		1.69		1.73		1.03		55		1.601		1.804
15:32	5		151		1.75		1.76		1.01		53		1.609		1.639
15:34	5.3		151		1.88		1.9		1.01		56		1.833		1.873
15:36	5.6		153		1.97		2		1.02		60		1.943		2.032
15:38	5.7		153		2		2.05		1.03		63		2.091		2.156
15:39	5.6		153		1.97		2.08		1.05		63		1.902		2.143
15:41	5.8		153		2.07		2.23		1.08		73		1.909		2.085
15:42	5.7		153		2.01		2.19		1.09		73		1.872		1.922
15:44	5.5		153		1.93		2.13		1.1		72		1.871		2.004
15:46	5.5		151		1.94		2.15		1.11		70		1.888		1.96
15:47	5.3		151		1.86		2.07		1.11		69		1.818		1.966
15:49	5.3		151		1.87		2.07		1.11		69		1.736		1.865
15:50	5.4		151		1.92		2.13		1.11		70		1.822		1.933
15:53	3.8		151		1.35		1.48		1.1		47		1.958		1.933
15:54	6.7		153		2.37		2.43		1.03		77		1.931		2.137
15:56	6.2		153		2.19		2.36		1.08		80		1.859		2.055
15:57	5.5		153		1.95		2.14		1.09		71		1.797		1.947
15:59	5.9		153		2.09		2.25		1.08		72		1.806		1.73
16:00	5		153		1.78		1.9		1.07		62		1.682		1.901
16:02	5.8		153		2.05		2.2		1.07		71		1.717		1.74
16:03	5.5		153		1.95		2.08		1.07		68		1.676		1.798
16:05	5.4		153		1.92		2.07		1.08		64		1.82		2.009
16:07	5.6		153		1.97		2.12		1.08		67		1.719		1.874
16:08	5.2		153		1.85		1.99		1.07		62		1.659		1.818
16:10	5.3		153		1.88		2.01		1.07		64		1.704		1.846
16:11	5.5		153		1.94		2.07		1.07		64		1.789		1.843
16:13	5.5		153		1.95		2.1		1.07		66		1.802		1.984
16:15	4.9		151		1.72		1.87		1.09		63		1.679		1.898
16:17	4.7		151		1.67		1.82		1.09		52		2.352		2.397
16:19	5.5		151		1.95		2.01		1.03		60		1.633		1.905
16:20	6		153		2.11		2.2		1.04		70		1.642		1.733
16:22	5.4		153		1.91		2.05		1.07		68		1.693		1.988
16:23	6.3		153		2.21		2.37		1.07		77		1.788		1.74
16:25	5.5		153		1.96		2.16		1.1		72		1.745		1.921
16:26	5.7		153		2		2.2		1.1		71		1.713		1.818
16:28	5.5		153		1.94		2.15		1.11		70		1.826		1.977
16:29	5.3		153		1.88		2.11		1.12		70		1.748		1.927
16:31	5.8		153		2.04		2.28		1.12		74		1.937		2.003
16:32	5.6		153		1.97		2.22		1.12		74		1.788		1.921
16:34	5.7		153		2		2.23		1.12		74		1.878		2.03
16:35	5.4		155		1.92		2.16		1.13		71		1.864		2
16:37	5.5		155		1.94		2.21		1.14		73		1.822		1.976
16:38	5.4		155		1.89		2.14		1.13		70		1.794		1.946
16:40	5		157		1.76		1.98		1.12		66		1.809		1.89
16:42	5.2		157		1.83		2.03		1.11		63		2.199		2.241
16:44	5		157		1.76		1.91		1.09		60		1.986		2.284
16:47	4.3		157		1.52		1.63		1.07		50		2.139		2.064
16:48	7.3		157		2.58		2.6		1.01		78		1.98		2.076
16:50	6.2		157		2.19		2.3		1.05		73		1.863		2.126
16:51	6.3		157		2.22		2.41		1.09		79		2.051		2.209
16:53	5.8		157		2.06		2.26		1.09		72		1.971		2.079
16:54	5.6		157		1.97		2.18		1.1		73		1.662		1.812
16:56	5.6		157		1.99		2.21		1.11		72		1.783		1.857
16:58	5.6		157		1.99		2.22		1.11		71		2.073		2.213
16:59	5.8		157		2.04		2.3		1.13		77		1.87		1.981
17:01	5.3		157		1.87		2.11		1.13		70		1.721		1.897
17:02	5.6		157		1.99		2.24		1.13		73		1.861		1.934
17:04	5.8		157		2.04		2.31		1.14		75		1.912		2.06
17:05	6		157		2.12		2.4		1.14		80		1.901		2.053
17:06	5.3		157		1.88		2.13		1.14		72		1.642		1.794
17:08	5.5		157		1.96		2.25		1.15		76		1.825		1.983
17:09	5.7		157		2		2.28		1.14		77		1.752		1.842
17:11	5.7		157		2		2.3		1.15		77		1.775		1.889
17:12	5.5		157		1.96		2.25		1.15		75		1.809		1.933
17:13	5.8		157		2.05		2.4		1.17		81		1.793		2.012
17:15	5.4		160		1.91		2.26		1.18		81		1.624		1.851
17:16	5.6		160		1.97		2.32		1.18		78		1.763		1.798
17:17	5.8		160		2.04		2.38		1.17		80		1.952		2.051
17:19	5.3		160		1.88		2.18		1.16		73		1.832		1.982
17:20	5.4		160		1.91		2.23		1.17		79		1.877		2.091
17:22	5.9		160		2.09		2.45		1.17		86		1.865		1.994
17:23	5.8		160		2.07		2.48		1.2		89		1.871		2.021
17:24	5.5		160		1.95		2.31		1.19		83		1.668		1.735
17:26	5.4		160		1.91		2.25		1.18		76		1.794		1.846
17:27	5.6		160		1.97		2.29		1.16		78		1.719		1.817
17:28	5.1		160		1.82		2.12		1.17		79		1.629		1.811
17:29	5.8		162		2.05		2.36		1.15		78		1.824		1.806
17:31	5		162		1.76		2		1.13		66		1.67		1.946
17:32	5.9		162		2.07		2.33		1.12		74		1.787		1.83
17:34	5.6		162		1.97		2.25		1.14		72		2.031		2.342
17:36	5.5		162		1.96		2.25		1.15		75		1.757		2.007
17:37	5.9		162		2.08		2.39		1.15		80		1.9		1.949
17:38	5.6		162		1.98		2.25		1.13		73		1.849		1.901
17:40	5.6		162		1.99		2.25		1.13		75		1.83		2.015
17:41	5.7		162		2.01		2.29		1.14		78		1.92		2.048
17:43	5.8		162		2.05		2.38		1.16		83		1.843		2.053
17:44	5.8		162		2.06		2.39		1.16		81		1.811		1.881
17:45	5.4		162		1.9		2.2		1.16		76		1.725		1.846
17:48	5.2		162		1.84		2.09		1.14		65		2.392		2.48
17:49	5.7		166		2.01		2.19		1.09		70		1.83		1.812
17:51	6.2		166		2.2		2.41		1.1		78		1.926		2.068
17:52	6		166		2.13		2.39		1.12		81		2.01		2.255
17:53	5.9		166		2.1		2.41		1.15		86		1.874		2.066
17:55	6		164		2.11		2.46		1.16		90		1.889		1.961
17:56	5.5		164		1.96		2.32		1.18		89		1.771		2.036
17:57	5.1		164		1.79		2.15		1.2		86		1.556		1.861
17:58	6.3		164		2.22		2.63		1.18		94		1.835		1.641
18:00	5.3		164		1.87		2.14		1.14		75		1.82		1.838
18:01	5.6		164		1.97		2.27		1.15		78		1.769		1.967
18:02	5.6		164		1.97		2.28		1.16		82		1.825		1.967
18:04	5.4		164		1.92		2.23		1.16		73		2.108		2.297
18:05	5.9		166		2.09		2.41		1.15		84		1.927		1.973
18:07	5.2		166		1.85		2.12		1.14		69		1.821		2.043
18:09	4.3		166		1.54		1.75		1.14		59		1.59		2.043
18:10	5.9		166		2.07		2.3		1.11		72		1.687		1.791
18:11	6.9		166		2.45		2.7		1.1		84		1.879		1.78
18:13	6.1		166		2.15		2.44		1.13		80		1.739		1.98
18:14	6.1		169		2.16		2.45		1.13		80		2.146		2.241
18:16	6.5		169		2.3		2.62		1.14		91		1.911		2.03
18:17	6.4		169		2.26		2.64		1.17		91		1.948		2.035
18:18	6.2		169		2.18		2.55		1.17		89		1.943		2.098
18:19	5.6		169		1.97		2.35		1.19		83		1.805		2.06
18:21	6		169		2.12		2.5		1.18		85		2.064		2.12
18:22	5.5		169		1.93		2.32		1.2		84		1.842		2.09
18:23	5.7		169		2.02		2.43		1.21		87		1.796		1.915
18:25	5.7		169		2		2.42		1.21		89		1.775		1.934
18:26	5.8		169		2.04		2.49		1.22		93		1.871		1.825
18:27	5.3		169		1.87		2.28		1.22		84		1.746		1.941
18:28	5.3		169		1.86		2.24		1.21		82		1.667		1.83
18:30	5.7		169		2.01		2.44		1.22		86		1.764		1.885
18:31	5.8		169		2.04		2.47		1.21		87		1.904		2.061
18:32	5.9		169		2.09		2.56		1.22		91		1.856		1.994
18:33	5.9		169		2.08		2.52		1.21		89		1.892		1.965
18:35	5.5		171		1.94		2.37		1.22		89		1.833		2.154
18:36	6		171		2.11		2.58		1.22		95		1.748		1.78
18:37	5.5		171		1.94		2.42		1.25		92		1.732		1.945
18:38	5.7		171		2		2.46		1.23		93		1.745		1.77
18:39	5.9		171		2.08		2.56		1.23		93		1.816		1.903
18:40	6		171		2.12		2.62		1.24		96		1.888		2.037
18:41	5.5		171		1.93		2.43		1.26		93		1.69		1.943
18:42	4.9		171		1.73		2.17		1.25		88		1.387		1.776
18:44	6.8		171		2.39		2.93		1.23		98		1.973		1.696
18:45	6.1		171		2.14		2.65		1.24		96		1.903		1.983
18:47	4.8		171		1.69		2.05		1.21		64		2.241		2.493
18:47	Recovery
18:48	6		171		2.11		2.45		1.16		81		1.931		2.028
18:50	6.3		171		2.21		2.57		1.16		86		2.002		2.142
18:51	5.9		171		2.07		2.46		1.19		87		1.958		2.218
18:52	6.3		171		2.21		2.65		1.2		92		2.024		2.074
18:54	6		171		2.11		2.56		1.21		96		2.066		2.243
18:55	5.6		171		1.97		2.39		1.22		90		1.853		2.134
18:56	6.7		171		2.36		2.86		1.21		101		2.029		1.843
18:57	5.9		171		2.08		2.5		1.2		88		1.789		1.935
18:59	6.1		171		2.17		2.6		1.2		91		1.994		2.099
19:00	5.7		169		2.03		2.5		1.23		91		1.861		2.113
19:01	5.9		169		2.1		2.57		1.22		92		1.83		1.891
19:02	5.9		169		2.09		2.54		1.21		90		1.774		1.821
19:03	5.5		169		1.95		2.37		1.22		84		1.612		1.839
19:05	5.8		169		2.06		2.48		1.2		85		1.735		1.811
19:06	5.7		169		2.01		2.41		1.2		84		1.683		1.84
19:07	5.9		169		2.07		2.49		1.2		87		1.891		1.995
19:08	6		169		2.12		2.56		1.21		91		1.801		1.924
19:10	5.7		169		2.01		2.47		1.23		92		1.919		2.16
19:11	5.8		169		2.07		2.55		1.24		94		1.883		1.945
19:12	5.7		169		2.01		2.46		1.22		88		1.754		1.86
19:13	5.5		169		1.95		2.38		1.22		86		1.712		1.892
19:14	5.8		169		2.05		2.46		1.2		84		1.767		1.811
19:16	5.7		169		2.02		2.44		1.21		85		1.716		1.859
19:17	5.9		169		2.08		2.53		1.21		89		1.84		1.946
19:18	5.3		169		1.86		2.29		1.23		85		1.652		1.94
19:19	5.8		169		2.05		2.55		1.24		93		1.729		1.779
19:20	5.9		169		2.07		2.62		1.27		96		1.875		1.986
19:21	5.4		169		1.93		2.47		1.28		93		1.75		1.947
19:23	5.5		169		1.94		2.46		1.27		88		1.665		1.701
19:24	5.5		166		1.94		2.46		1.27		88		1.7		1.788
19:25	5.4		166		1.89		2.41		1.27		88		1.603		1.772
19:26	5.6		166		1.97		2.48		1.26		88		1.757		1.803
19:27	4.9		166		1.75		2.24		1.28		81		1.616		1.878
19:28	5.1		166		1.8		2.29		1.27		83		1.597		1.715
19:29	5.4		166		1.89		2.39		1.26		85		1.578		1.626
19:31	5.1		166		1.79		2.25		1.26		80		1.53		1.661
19:32	4.8		166		1.7		2.14		1.26		77		1.456		1.671
19:33	4.7		166		1.67		2.1		1.26		76		1.45		1.556
19:34	5.1		164		1.82		2.28		1.26		80		1.561		1.606
19:50			160
20:06			157
20:21			151
20:37			150
20:53			144
21:09			141
21:24			141
21:40			136
21:56			136
22:12			131
22:28			131
22:43			131
22:59			133
23:15			130
23:31			127
23:31			127
23:47			122
24:03			122
24:19			116
	4.34227	1.75674	131.448	711.92	1.53397	0.218592	1.53302	0.429842	0.96013	0.025527	50.825	510.525	1.50534	0.173751	1.60167	0.198135
	METS						HR						VO2						VCO2						RER						VE						Vtex						Vtin						LABEL
	Rest		Test		Recovery		Rest		Test		Recovery		Rest		Test		Recovery		Rest		Test		Recovery		Rest		Test		Recovery		Rest		Test		Recovery		Rest		Test		Recovery		Rest		Test		Recovery
	MEDIA	VAR	MEDIA	VAR	MEDIA	VAR	MEDIA	VAR	MEDIA	VAR	MEDIA	VAR	MEDIA	VAR	MEDIA	VAR	MEDIA	VAR	MEDIA	VAR	MEDIA	VAR	MEDIA	VAR	MEDIA	VAR	MEDIA	VAR	MEDIA	VAR	MEDIA	VAR	MEDIA	VAR	MEDIA	VAR	MEDIA	VAR	MEDIA	VAR	MEDIA	VAR	MEDIA	VAR	MEDIA	VAR	MEDIA	VAR	BIN
	1.375	0.259333	4.23896	1.73413	5.66154	0.172429	77	4.23529	128.357	670.492	157.983	285.737	0.48625	0.0344917	1.49751	0.215826	1.99949	0.0206997	0.4175	0.0264467	1.46094	0.390373	2.45333	0.0200228	0.856875	0.00139625	0.939116	0.021359	1.22846	0.00102915	17.0625	34.8625	47.9478	434.223	87.5641	28.1471	0.745562	0.0640623	1.48479	0.17962	1.76777	0.0253422	0.745375	0.044279	1.5788	0.204239	1.89364	0.0291762	1
	1.375	0.259333	4.23896	1.73413	5.66154	0.172429	77	4.23529	128.357	670.492	157.983	285.737	0.48625	0.0344917	1.49751	0.215826	1.99949	0.0206997	0.4175	0.0264467	1.46094	0.390373	2.45333	0.0200228	0.856875	0.00139625	0.939116	0.021359	1.22846	0.00102915	17.0625	34.8625	47.9478	434.223	87.5641	28.1471	0.745562	0.0640623	1.48479	0.17962	1.76777	0.0253422	0.745375	0.044279	1.5788	0.204239	1.89364	0.0291762	1
[truncated: 1 more columns]
