# Supplementary material for: On the development of diagnostic support algorithms based on CPET biosignals data via machine learning and wavelets
Source: PeerJ journal article supplement (doi:10.7717/peerj-cs.2474), 2025-01-30
Supplement: raw_data.zip [file Subject22_BxB.xlsx]

## Sheet: Demographics
Gender:	female
Age:	57
Height (cm):	156
Weight (kg):	84.4
BMI:	35
Condition:	Metabolic Syndrome

## Sheet: Subject22_BxB
Time	METS		HR		V'O2		V'CO2		RER		V'E		VTex		VTin
min			1/min		L/min		L/min				L/min		L		L
00:00	Rest
05:16
05:22	1		64		0.3		0.25		0.81		8		0.814		0.109
05:26	1.1		65		0.33		0.27		0.81		9		0.565		0.872
05:31	0.7		64		0.2		0.15		0.76		5		0.463		0.48
05:36	0.8		63		0.25		0.19		0.75		6		0.467		0.758
05:41	1.2		64		0.35		0.27		0.75		8		0.605		0.664
05:44	1.7		61		0.51		0.39		0.76		12		0.786		0.702
05:48	1.3		61		0.39		0.3		0.77		10		0.673		0.704
05:53	1.1		62		0.31		0.25		0.79		8		0.573		0.69
05:56	1.3		61		0.39		0.31		0.8		10		0.676		0.665
06:00	1.4		64		0.41		0.33		0.82		11		0.713		0.727
06:04	1.1		65		0.33		0.27		0.83		9		0.644		0.689
06:09	1.2		65		0.35		0.29		0.83		10		0.678		0.636
06:13	0.8		67		0.25		0.2		0.83		7		0.547		0.611
06:18	0.8		68		0.25		0.2		0.81		7		0.547		0.698
06:22	1.3		68		0.37		0.3		0.8		10		0.678		0.649
06:26	1.1		68		0.32		0.26		0.8		9		0.544		0.543
06:30	1		68		0.3		0.24		0.8		8		0.552		0.569
06:34	1.4		68		0.41		0.33		0.81		11		0.728		0.798
06:38	1.4		68		0.42		0.35		0.83		12		0.802		0.917
06:45	1.1		75		0.31		0.24		0.77		7		0.835		0.725
06:49	1.7		75		0.5		0.4		0.8		13		0.879		0.898
06:53	1.4		76		0.42		0.35		0.83		12		0.796		0.871
06:57	1.2		75		0.35		0.29		0.85		10		0.704		0.763
07:01	1		73		0.3		0.26		0.86		9		0.601		0.667
07:05	1		74		0.28		0.24		0.85		9		0.526		0.608
07:10	0.7		76		0.2		0.17		0.85		6		0.521		0.645
07:14	0.6		76		0.18		0.15		0.82		6		0.406		0.511
07:18	1.4		76		0.42		0.34		0.81		11		0.746		0.68
07:23	1.7		75		0.51		0.43		0.83		13		0.991		0.926
07:23	Test
07:27	0.9		75		0.27		0.22		0.82		8		0.557		0.628
07:31	1.2		71		0.36		0.29		0.79		9		0.611		0.483
07:34	1.6		70		0.46		0.36		0.77		11		0.594		0.61
07:41	2.8		76		0.84		0.68		0.82		20		2.224		2.337
07:45	1.3		83		0.39		0.29		0.74		9		0.612		0.427
07:48	1.3		83		0.38		0.25		0.67		8		0.447		0.502
07:51	3		82		0.88		0.58		0.67		17		0.834		0.865
07:55	3.3		83		0.98		0.71		0.72		21		1.162		1.293
07:58	2.7		83		0.8		0.6		0.76		18		1.038		1.032
08:02	2.3		85		0.68		0.54		0.79		16		1.005		1.014
08:05	2.3		86		0.69		0.53		0.76		15		0.835		0.749
08:08	2.1		86		0.63		0.47		0.75		14		0.753		0.774
08:11	2.4		86		0.72		0.52		0.72		15		0.737		0.771
08:14	2.5		86		0.74		0.54		0.72		16		0.816		0.881
08:17	2.9		86		0.87		0.64		0.74		18		1.008		1.033
08:20	2.6		85		0.76		0.56		0.74		17		0.815		0.921
08:23	3		85		0.88		0.65		0.74		19		0.904		0.873
08:26	2.9		85		0.86		0.64		0.74		18		0.951		0.988
08:29	3		85		0.87		0.64		0.73		19		0.909		0.939
08:32	2.7		87		0.81		0.59		0.73		17		0.894		0.917
08:35	2.9		87		0.87		0.62		0.72		18		0.902		0.903
08:38	3		87		0.87		0.62		0.71		18		0.9		0.931
08:41	3.1		86		0.91		0.64		0.71		18		0.937		0.97
08:44	2.9		86		0.87		0.62		0.72		18		0.958		0.998
08:47	3.2		86		0.96		0.69		0.72		20		1.036		1.009
08:50	3		85		0.89		0.64		0.72		19		0.899		0.931
08:53	3		85		0.89		0.64		0.72		19		0.878		0.86
08:56	2.8		85		0.82		0.6		0.73		18		0.932		0.964
08:59	3.1		85		0.91		0.67		0.73		19		0.974		0.947
09:02	3		85		0.89		0.64		0.72		18		0.928		0.928
09:05	3.2		85		0.94		0.68		0.72		19		0.959		1.001
09:08	3.4		85		1.01		0.73		0.72		21		1.016		0.996
09:11	3.1		86		0.92		0.67		0.73		19		0.978		0.979
09:14	3.3		89		0.97		0.7		0.73		20		0.998		1.026
09:17	3.4		89		1.01		0.74		0.73		22		1.034		1.066
09:20	3.5		90		1.03		0.76		0.74		22		1.087		1.057
09:23	2.9		90		0.86		0.63		0.73		19		0.903		0.938
09:26	3.2		89		0.96		0.7		0.73		19		0.978		0.923
09:29	3.3		90		0.96		0.7		0.72		20		1.005		1.048
09:32	3.3		90		0.99		0.72		0.73		21		1.016		1.056
09:35	3.4		90		1		0.74		0.74		21		1.034		1.054
09:38	3.4		90		1.01		0.75		0.74		21		1.053		1.01
09:41	3.2		90		0.96		0.71		0.74		20		0.999		1.049
09:44	3.4		90		1		0.74		0.74		21		1.025		1.011
09:47	3.5		90		1.02		0.76		0.74		22		0.991		1.065
09:49	3.6		94		1.07		0.8		0.74		23		1.033		1.03
09:53	3.1		94		0.91		0.69		0.75		19		1.106		1.224
09:56	3.7		101		1.08		0.8		0.74		23		1.135		1.021
09:58	3.3		101		0.97		0.7		0.73		20		0.933		0.959
10:01	3.6		98		1.06		0.78		0.73		22		1.091		1.07
10:04	3.9		93		1.15		0.85		0.74		24		1.173		1.197
10:07	3.5		93		1.02		0.77		0.75		22		1.095		1.152
10:10	3.4		92		0.99		0.74		0.75		21		0.952		0.962
10:13	3.4		92		1		0.74		0.74		21		1.034		1.073
10:16	3.6		94		1.07		0.78		0.74		22		1.13		1.078
10:19	3.6		94		1.07		0.78		0.73		22		1.096		1.097
10:22	3.7		96		1.08		0.79		0.73		23		1.01		1.077
10:25	3.8		102		1.13		0.84		0.74		23		1.19		1.157
10:28	3.7		102		1.09		0.81		0.75		23		1.13		1.16
10:31	3.6		101		1.06		0.8		0.75		22		1.089		1.155
10:34	3.7		101		1.1		0.82		0.74		23		1.055		1.068
10:36	3.4		95		1.02		0.74		0.73		22		0.893		0.937
10:39	3.7		95		1.1		0.81		0.74		22		1.085		1.055
10:42	3.7		96		1.09		0.81		0.74		23		1.024		1.115
10:45	3.9		95		1.14		0.85		0.75		24		1.141		1.133
10:48	3.7		95		1.09		0.82		0.76		23		1.158		1.259
10:50	3.7		96		1.08		0.82		0.76		23		1.11		1.182
10:53	3.7		96		1.1		0.83		0.75		23		1.055		1.078
10:56	3.8		96		1.14		0.85		0.75		24		1.043		1.117
10:59	4		96		1.18		0.88		0.75		24		1.132		1.063
11:02	4		104		1.19		0.9		0.75		24		1.259		1.305
11:05	3.9		112		1.15		0.88		0.76		24		1.183		1.224
11:08	3.8		112		1.13		0.86		0.76		23		1.189		1.195
11:11	3.9		109		1.14		0.87		0.76		24		1.215		1.258
11:14	3.9		109		1.16		0.88		0.76		24		1.188		1.219
11:16	3.7		99		1.1		0.84		0.76		24		1.032		1.092
11:19	4.1		98		1.2		0.92		0.77		25		1.228		1.204
11:22	3.8		98		1.13		0.88		0.78		24		1.199		1.274
11:27	4		98		1.17		0.97		0.83		27		2.198		2.331
11:30	3.3		98		0.99		0.76		0.77		21		0.975		0.967
11:32	3.2		98		0.96		0.7		0.73		20		0.864		0.877
11:35	3.9		110		1.16		0.84		0.72		23		1.041		1.07
11:38	4.5		110		1.32		0.97		0.74		26		1.226		1.257
11:41	4.2		111		1.23		0.95		0.77		26		1.348		1.443
11:44	3.9		111		1.14		0.89		0.78		25		1.221		1.284
11:47	4		101		1.17		0.91		0.78		25		1.187		1.179
11:50	3.8		100		1.13		0.87		0.76		24		1.055		1.072
11:52	3.9		100		1.16		0.89		0.76		24		1.045		1.097
11:55	4.3		94		1.27		0.97		0.76		26		1.063		1.091
11:57	4.1		94		1.22		0.94		0.77		26		1.243		1.175
12:00	4.2		96		1.24		0.95		0.76		26		1.153		1.187
12:03	4.1		96		1.2		0.93		0.77		25		1.17		1.23
12:05	4.1		100		1.2		0.93		0.77		26		1.138		1.126
12:08	4		100		1.19		0.92		0.77		26		1.092		1.126
12:11	4.2		99		1.23		0.97		0.78		26		1.251		1.241
12:13	3.9		99		1.16		0.9		0.78		25		1.131		1.155
12:16	3.9		99		1.14		0.88		0.77		24		1.078		1.084
12:19	4.1		99		1.22		0.95		0.77		26		1.224		1.221
12:22	4.2		99		1.25		0.98		0.79		27		1.295		1.316
12:25	4.1		101		1.21		0.95		0.79		26		1.241		1.223
12:27	4		101		1.19		0.93		0.78		25		1.137		1.181
12:30	4.2		99		1.23		0.94		0.77		26		1.135		1.193
12:33	4.5		99		1.34		1.03		0.77		28		1.169		1.194
12:35	4.3		104		1.27		0.99		0.78		27		1.232		1.293
12:38	4.4		104		1.29		1		0.78		28		1.173		1.237
12:41	4.1		100		1.2		0.94		0.78		25		1.175		1.154
12:44	4.3		100		1.27		0.98		0.77		26		1.278		1.243
12:46	4.5		86		1.34		1.03		0.77		28		1.232		1.352
12:49	4.6		86		1.35		1.05		0.78		28		1.293		1.325
12:52	4.6		100		1.37		1.08		0.79		29		1.273		1.336
12:54	4.6		100		1.36		1.07		0.79		30		1.23		1.243
12:57	4.2		98		1.25		0.99		0.79		27		1.241		1.268
13:00	4.4		100		1.3		1.02		0.79		27		1.287		1.271
13:02	4.4		100		1.3		1.01		0.78		27		1.282		1.279
13:05	4.3		92		1.28		1.01		0.78		27		1.221		1.387
13:08	4.7		92		1.39		1.09		0.78		30		1.285		1.318
13:10	4.7		96		1.4		1.11		0.79		31		1.326		1.306
13:13	4.5		96		1.32		1.05		0.8		29		1.277		1.367
13:16	4.8		109		1.42		1.13		0.8		30		1.342		1.351
13:18	4.7		109		1.38		1.09		0.79		30		1.129		1.243
13:21	4.7		116		1.39		1.11		0.8		29		1.346		1.363
13:23	4.8		116		1.42		1.14		0.8		30		1.414		1.465
13:26	4.9		115		1.46		1.17		0.8		32		1.449		1.509
13:29	5.1		115		1.51		1.22		0.81		33		1.418		1.416
13:31	4.9		113		1.43		1.16		0.81		31		1.319		1.38
13:34	5		113		1.47		1.19		0.81		32		1.31		1.363
13:36	4.8		131		1.42		1.14		0.8		31		1.257		1.322
13:39	5.3		131		1.55		1.26		0.81		34		1.384		1.403
13:41	4.9		139		1.44		1.17		0.82		32		1.343		1.426
13:44	5.4		139		1.6		1.32		0.83		36		1.472		1.443
13:46	4.7		139		1.4		1.14		0.82		31		1.197		1.198
13:48	5		139		1.48		1.22		0.83		33		1.354		1.408
13:51	4.8		118		1.42		1.17		0.82		31		1.415		1.387
13:55	4.1		122		1.21		0.98		0.81		25		1.604		1.49
13:58	6.1		122		1.79		1.43		0.8		38		1.8		1.945
14:01	5.4		123		1.59		1.34		0.84		37		1.81		1.938
14:03	4.7		123		1.4		1.19		0.85		33		1.437		1.558
14:06	5		114		1.48		1.22		0.83		33		1.333		1.32
14:08	5		114		1.47		1.22		0.83		33		1.38		1.466
14:11	4.8		114		1.41		1.16		0.82		31		1.293		1.377
14:14	4.8		114		1.43		1.18		0.82		31		1.538		1.527
14:17	5.9		114		1.73		1.47		0.85		41		1.876		1.913
14:19	4.9		112		1.45		1.24		0.86		35		1.514		1.699
14:22	4.9		112		1.46		1.26		0.86		34		1.513		1.528
14:25	4.9		114		1.44		1.22		0.84		32		1.392		1.438
14:27	5		114		1.47		1.23		0.84		32		1.407		1.466
14:30	4.9		116		1.44		1.2		0.84		31		1.474		1.57
14:32	5.9		116		1.76		1.47		0.84		40		1.476		1.673
14:35	5.7		118		1.68		1.43		0.85		39		1.552		1.558
14:37	5.6		118		1.67		1.47		0.88		42		1.734		1.876
14:40	5.4		121		1.6		1.41		0.89		39		1.656		1.675
14:42	5.2		121		1.53		1.34		0.87		38		1.451		1.507
14:44	5.3		113		1.55		1.35		0.87		37		1.443		1.514
14:47	5.1		113		1.52		1.33		0.87		37		1.431		1.561
14:48	5		113		1.49		1.25		0.84		39		0.912		0.934
14:50	6.3		107		1.85		1.6		0.86		44		1.761		1.829
14:53	5.1		107		1.52		1.33		0.87		37		1.381		1.458
14:55	5.5		120		1.63		1.45		0.89		41		1.525		1.71
14:57	5		120		1.49		1.31		0.88		36		1.328		1.316
15:00	5.2		116		1.52		1.35		0.89		37		1.535		1.575
15:02	5.3		116		1.56		1.37		0.88		38		1.493		1.533
15:05	5.1		118		1.51		1.33		0.88		35		1.527		1.664
15:08	3		118		0.88		0.72		0.81		19		1.126		1.205
15:10	7.5		118		2.2		1.78		0.81		44		1.657		1.66
15:13	6.1		118		1.79		1.49		0.83		41		1.576		1.658
15:15	5.8		115		1.72		1.48		0.86		41		1.655		1.735
15:17	5.6		115		1.65		1.44		0.88		41		1.496		1.631
15:19	5.5		117		1.62		1.44		0.89		40		1.476		1.588
15:22	5.2		117		1.54		1.37		0.89		38		1.418		1.476
15:24	5		117		1.48		1.31		0.88		35		1.461		1.531
15:26	5.3		117		1.56		1.36		0.87		37		1.415		1.556
15:29	5.5		117		1.63		1.43		0.87		39		1.517		1.627
15:31	5.2		125		1.55		1.35		0.87		37		1.436		1.551
15:34	5.4		125		1.6		1.4		0.87		39		1.581		1.571
15:36	5.5		120		1.61		1.4		0.87		39		1.483		1.612
15:38	5.5		120		1.62		1.42		0.88		39		1.525		1.647
15:40	5.8		121		1.73		1.53		0.88		44		1.551		1.574
15:43	5.7		121		1.68		1.49		0.89		41		1.529		1.576
15:45	5.4		118		1.6		1.44		0.9		41		1.506		1.652
15:47	5.5		118		1.61		1.46		0.9		39		1.643		1.635
15:50	5.2		120		1.53		1.36		0.89		36		1.507		1.689
15:52	5.6		120		1.66		1.47		0.89		40		1.533		1.621
15:55	5.7		125		1.69		1.54		0.91		42		1.973		1.974
15:57	5.3		125		1.56		1.4		0.9		38		1.597		1.717
16:00	5.8		125		1.71		1.53		0.89		42		1.578		1.692
16:02	5.7		125		1.69		1.52		0.9		42		1.594		1.693
16:04	5.6		125		1.65		1.48		0.9		42		1.511		1.583
16:06	5.6		131		1.66		1.51		0.91		42		1.616		1.684
16:09	5.7		131		1.69		1.53		0.91		43		1.523		1.68
16:11	5.8		131		1.71		1.56		0.91		43		1.616		1.644
16:13	5.7		131		1.69		1.54		0.91		41		1.677		1.73
16:15	5.6		123		1.66		1.5		0.91		41		1.541		1.706
16:18	5.8		123		1.72		1.58		0.92		43		1.563		1.685
16:20	5.8		125		1.71		1.56		0.91		43		1.531		1.578
16:23	5.5		125		1.63		1.54		0.94		40		2.181		2.338
16:25	5.2		123		1.54		1.37		0.89		37		1.396		1.478
16:27	5.4		123		1.59		1.39		0.87		37		1.268		1.442
16:29	6		126		1.76		1.53		0.87		41		1.402		1.443
16:32	6.2		126		1.83		1.62		0.88		44		1.549		1.702
16:34	6		126		1.79		1.59		0.89		44		1.518		1.574
16:36	6		125		1.77		1.58		0.9		42		1.592		1.646
16:38	6.1		125		1.8		1.63		0.91		46		1.642		1.743
16:40	6.2		126		1.84		1.7		0.92		48		1.572		1.673
16:42	5.8		126		1.73		1.61		0.93		44		1.54		1.701
16:44	6.2		127		1.82		1.7		0.93		47		1.673		1.687
16:47	5.9		127		1.73		1.62		0.94		44		1.661		1.742
16:49	6.1		127		1.79		1.68		0.94		47		1.719		1.849
16:51	5.8		127		1.72		1.62		0.94		44		1.579		1.715
16:53	6.3		127		1.87		1.76		0.94		49		1.689		1.754
16:55	6		129		1.78		1.67		0.94		47		1.632		1.773
16:57	6.2		129		1.83		1.73		0.94		50		1.6		1.699
16:59	6.1		129		1.8		1.72		0.95		47		1.645		1.612
17:01	6.1		129		1.81		1.74		0.96		49		1.709		1.834
17:03	6.1		129		1.8		1.71		0.95		48		1.615		1.723
17:05	5.5		130		1.62		1.55		0.96		46		1.241		1.621
17:07	6.2		130		1.82		1.75		0.96		47		1.551		1.558
17:09	6.5		130		1.93		1.87		0.97		53		1.734		1.626
17:11	6.1		131		1.81		1.73		0.96		48		1.539		1.672
17:13	6.3		131		1.87		1.79		0.96		50		1.576		1.668
17:14	6.2		131		1.84		1.77		0.96		49		1.582		1.698
17:16	6.2		131		1.83		1.76		0.96		48		1.571		1.675
17:18	6.4		131		1.88		1.8		0.96		50		1.683		1.682
17:20	6		131		1.78		1.7		0.95		47		1.578		1.721
17:22	6.4		131		1.88		1.82		0.96		51		1.599		1.76
17:24	6.5		131		1.93		1.87		0.97		54		1.608		1.646
17:26	6.4		131		1.9		1.84		0.97		52		1.624		1.677
17:28	5.9		131		1.74		1.68		0.96		47		1.471		1.668
17:30	6.6		131		1.96		1.9		0.97		54		1.705		1.703
17:32	6.4		131		1.9		1.86		0.97		53		1.651		1.686
17:33	6.4		131		1.89		1.85		0.98		52		1.591		1.711
17:35	6.1		133		1.81		1.77		0.98		50		1.62		1.699
17:37	6.3		133		1.85		1.82		0.98		50		1.689		1.747
17:39	6.4		133		1.91		1.86		0.98		53		1.678		1.795
17:41	6.4		133		1.89		1.85		0.98		51		1.714		1.784
17:43	6.6		133		1.95		1.91		0.98		53		1.797		1.9
17:45	6.3		133		1.87		1.84		0.98		52		1.71		1.883
17:47	6.7		133		1.98		1.94		0.98		56		1.644		1.733
17:49	6.8		133		2.02		2.01		1		57		1.922		1.926
17:51	6.6		134		1.94		1.95		1		56		1.773		1.945
17:53	6.6		134		1.95		1.96		1.01		58		1.585		1.799
17:54	6.6		136		1.94		1.98		1.02		58		1.782		1.771
17:56	6.5		136		1.92		1.96		1.02		55		1.7		1.808
17:58	6.8		136		2.01		2.06		1.03		60		1.694		1.81
18:00	6.5		137		1.93		1.99		1.03		57		1.726		1.76
18:02	6.6		137		1.94		2		1.03		57		1.739		1.862
18:03	6.4		137		1.9		1.95		1.03		55		1.67		1.819
18:05	6.6		137		1.94		2		1.03		55		1.729		1.812
18:07	6.6		137		1.94		2		1.03		57		1.647		1.822
18:09	6.5		137		1.92		1.96		1.02		54		1.652		1.675
18:11	6.8		139		2		2.03		1.01		56		1.615		1.724
18:12	6.5		139		1.93		2		1.04		59		1.547		1.858
18:14	6.9		139		2.04		2.12		1.04		57		1.836		1.709
18:16	6.9		139		2.05		2.13		1.04		58		1.849		1.909
18:18	6.9		139		2.03		2.08		1.02		58		1.8		1.821
18:20	6.7		139		1.98		2.04		1.03		59		1.608		1.806
18:21	7		139		2.07		2.15		1.04		60		1.784		1.819
18:23	6.7		139		1.99		2.09		1.05		58		1.785		1.963
18:25	6.7		139		1.98		2.09		1.06		58		1.867		2.059
18:27	6.8		139		2.01		2.11		1.05		57		1.869		1.783
18:29	6.6		139		1.95		2.05		1.05		56		1.878		2.12
18:31	7		139		2.07		2.17		1.05		61		1.622		1.833
18:32	6.9		139		2.04		2.16		1.06		61		1.738		1.727
18:34	7.2		139		2.13		2.27		1.07		66		1.652		1.86
18:36	7.3		141		2.17		2.34		1.08		65		1.866		1.825
18:37	6.8		141		2.02		2.17		1.07		61		1.827		1.924
18:39	6.6		142		1.96		2.11		1.08		59		1.762		1.978
18:41	6.9		142		2.05		2.21		1.08		63		1.815		1.802
18:43	6.8		142		2		2.14		1.07		59		1.705		1.835
18:45	7		142		2.05		2.21		1.07		59		1.956		2.022
18:46	7.5		142		2.22		2.38		1.07		67		1.858		1.946
18:48	7		142		2.07		2.24		1.08		62		1.988		2
18:50	6.6		144		1.94		2.08		1.07		61		1.573		1.867
18:51	7.3		144		2.16		2.37		1.1		69		1.719		1.781
18:53	7.2		144		2.12		2.33		1.1		65		1.839		1.855
18:56	5.2		144		1.52		1.66		1.09		42		2.125		2.19
18:58	8.2		144		2.41		2.41		1		62		1.734		1.892
18:59	8.2		144		2.43		2.5		1.03		71		1.724		1.847
19:01	8.3		144		2.45		2.59		1.06		76		1.727		1.852
19:02	7.2		144		2.13		2.32		1.09		67		1.594		1.541
19:02	Recovery
19:03	7.5		136		2.21		2.45		1.11		72		1.775		1.927
19:05	7		137		2.05		2.32		1.13		69		1.733		1.903
19:06	6.6		137		1.94		2.2		1.14		65		1.603		1.689
19:08	6.4		137		1.9		2.11		1.11		58		1.635		1.679
19:10	6.8		148		2		2.2		1.1		61		1.714		1.75
19:11	6.8		148		2.01		2.21		1.09		62		1.708		1.781
19:13	6.7		148		1.97		2.15		1.09		59		1.68		1.832
19:15	6.7		131		1.98		2.14		1.08		59		1.701		1.741
19:17	6.5		131		1.92		2.06		1.08		57		1.533		1.716
19:18	6.7		131		1.98		2.16		1.09		61		1.529		1.653
19:20	6.5		130		1.91		2.11		1.1		60		1.522		1.63
19:21	6.4		130		1.89		2.08		1.1		57		1.692		1.623
19:23	6.3		130		1.87		2.06		1.1		57		1.654		1.82
19:25	6.1		129		1.81		1.97		1.09		55		1.542		1.659
19:26	6.5		129		1.93		2.1		1.09		58		1.594		1.652
19:28	6.5		129		1.91		2.08		1.08		57		1.791		1.698
19:30	6.1		134		1.81		1.99		1.1		55		1.684		1.995
19:32	6.5		134		1.91		2.12		1.11		58		1.783		1.724
19:34	6.4		134		1.9		2.14		1.13		60		1.848		1.961
19:36	6.1		131		1.8		2.04		1.13		58		1.745		1.717
19:38	5.7		131		1.7		1.94		1.15		54		1.845		1.849
19:40	6		127		1.78		2.05		1.15		57		1.965		1.96
19:42	5.4		127		1.61		1.85		1.15		51		1.866		1.878
19:44	5.7		123		1.69		1.98		1.17		54		2.06		2.148
19:46	5.8		123		1.71		2		1.17		55		1.979		2
19:49	5.2		123		1.53		1.78		1.16		50		1.721		1.779
19:51	5.3		122		1.55		1.82		1.17		51		1.87		1.972
19:53	4.7		122		1.4		1.65		1.18		46		1.677		1.788
19:55	4.7		120		1.38		1.63		1.18		46		1.686		1.698
19:59			117												1.709
20:15			115
20:31			108
20:47			105
21:02			100
21:18			101
21:34			101
21:50			98
22:05			93
22:21			93
22:37			93
	5.03279	2.0368	114.455	358.708	1.48724	0.177519	1.35594	0.299222	0.880584	0.0173267	37.7403	235.73	1.40743	0.108894	1.46741	0.130335
	METS						HR						VO2						VCO2						RER						VE						Vtex						Vtin						LABEL
	Rest		Test		Recovery		Rest		Test		Recovery		Rest		Test		Recovery		Rest		Test		Recovery		Rest		Test		Recovery		Rest		Test		Recovery		Rest		Test		Recovery		Rest		Test		Recovery
	MEDIA	VAR	MEDIA	VAR	MEDIA	VAR	MEDIA	VAR	MEDIA	VAR	MEDIA	VAR	MEDIA	VAR	MEDIA	VAR	MEDIA	VAR	MEDIA	VAR	MEDIA	VAR	MEDIA	VAR	MEDIA	VAR	MEDIA	VAR	MEDIA	VAR	MEDIA	VAR	MEDIA	VAR	MEDIA	VAR	MEDIA	VAR	MEDIA	VAR	MEDIA	VAR	MEDIA	VAR	MEDIA	VAR	MEDIA	VAR	BIN
	1.15517	0.0882759	4.91219	2.05028	6.1931	0.436379	68.4483	28.8276	113.172	364.503	123.4	232.759	0.341724	0.00780049	1.45168	0.178813	1.82931	0.0372281	0.276552	0.0051234	1.28401	0.27209	2.04793	0.0317884	0.807931	0.000931281	0.85552	0.0123255	1.12172	0.00111478	9.17241	4.79064	35.7061	212.942	57.3103	32.5074	0.657241	0.0191386	1.37402	0.10649	1.72879	0.0185653	0.681897	0.025377	1.4319	0.129481	1.7977	0.018036	1
	1.15517	0.0882759	4.91219	2.05028	6.1931	0.436379	68.4483	28.8276	113.172	364.503	123.4	232.759	0.341724	0.00780049	1.45168	0.178813	1.82931	0.0372281	0.276552	0.0051234	1.28401	0.27209	2.04793	0.0317884	0.807931	0.000931281	0.85552	0.0123255	1.12172	0.00111478	9.17241	4.79064	35.7061	212.942	57.3103	32.5074	0.657241	0.0191386	1.37402	0.10649	1.72879	0.0185653	0.681897	0.025377	1.4319	0.129481	1.7977	0.018036	1
[truncated: 1 more columns]
