# Supplementary material for: On the development of diagnostic support algorithms based on CPET biosignals data via machine learning and wavelets
Source: PeerJ journal article supplement (doi:10.7717/peerj-cs.2474), 2025-01-30
Supplement: raw_data.zip [file Subject23_BxB.xlsx]

## Sheet: Demographics
Gender:	female
Age:	50
Height (cm):	165
Weight (kg):	107.2
BMI:	39
Condition:	Metabolic Syndrome

## Sheet: Subject23_BxB
Time	METS		HR		V'O2		V'CO2		RER		V'E		VTex		VTin
min			1/min		L/min		L/min				L/min		L		L
00:00	Rest
01:48
02:03			76
02:19			76
02:35			81
02:40	1.1		78		0.42		0.33		0.78		10		0.739		1.328
02:44	1.4		75		0.52		0.42		0.82		12		0.991		1.027
02:49	1.6		75		0.62		0.53		0.85		16		1.115		1.125
02:52	1		74		0.38		0.33		0.86		11		0.693		0.839
02:57	1.1		73		0.42		0.34		0.82		10		0.787		0.542
03:02	1.2		72		0.47		0.39		0.84		12		0.985		1.161
03:06	1.2		74		0.44		0.36		0.82		11		0.766		0.732
03:11	1.4		73		0.51		0.42		0.82		12		0.968		0.923
03:13	0.7		73		0.28		0.21		0.76		7		0.181		0.114
03:17	1.6		73		0.61		0.49		0.81		15		0.935		1.065
03:20	1.3		73		0.49		0.38		0.78		12		0.733		0.696
03:25	1.2		75		0.46		0.36		0.8		11		0.798		0.897
03:25	Test
03:28	0.9		76		0.35		0.28		0.78		9		0.558		0.624
03:32	1.4		76		0.51		0.4		0.78		12		0.673		0.681
03:35	1.7		74		0.64		0.49		0.77		15		0.803		0.705
03:38	2		75		0.75		0.57		0.76		16		0.755		0.709
03:41	2		76		0.75		0.6		0.79		18		0.92		1.026
03:44	1.7		76		0.66		0.51		0.78		15		0.759		0.76
03:50	2.3		86		0.88		0.78		0.89		23		2.486		2.628
03:55	1.3		86		0.48		0.37		0.77		10		0.817		0.779
03:58	2.1		86		0.8		0.59		0.74		17		0.88		0.833
04:02	2.5		86		0.93		0.71		0.77		20		1.22		1.312
04:05	2.2		87		0.84		0.64		0.77		19		1.036		1.04
04:09	2.3		87		0.86		0.66		0.77		19		1.172		1.198
04:11	0.7		88		0.26		0.17		0.66		6		0.198		0.215
04:13	2.4		88		0.9		0.6		0.67		17		0.732		0.868
04:17	3.7		88		1.4		1.02		0.73		29		1.685		1.704
04:19	2.7		91		1		0.72		0.72		21		0.969		1.032
04:22	2.2		91		0.82		0.56		0.69		17		0.661		0.746
04:25	2.9		94		1.07		0.76		0.71		21		1.241		1.29
04:28	3.8		94		1.44		1.03		0.72		29		1.386		1.343
04:31	2.2		94		0.84		0.57		0.68		17		0.744		0.811
04:34	3.4		94		1.29		0.91		0.7		25		1.258		1.358
04:36	3.7		96		1.4		0.98		0.7		27		1.132		1.061
04:39	3		96		1.14		0.79		0.7		22		0.931		0.976
04:41	2.8		96		1.05		0.71		0.68		20		0.76		0.755
04:44	3.1		96		1.15		0.77		0.67		21		0.885		0.97
04:47	2.2		96		0.83		0.54		0.65		15		0.671		0.826
04:49	4.5		96		1.68		1.12		0.66		29		1.112		1.222
04:52	4.5		96		1.69		1.24		0.74		36		1.846		1.912
04:54	2.9		97		1.08		0.78		0.73		23		0.902		0.98
04:57	2.9		97		1.1		0.77		0.7		22		0.84		0.836
04:59	2.7		97		1		0.68		0.68		19		0.752		0.84
05:04	2.5		100		0.94		0.62		0.66		15		1.366		1.245
05:08	5.1		100		1.9		1.24		0.65		31		1.727		1.785
05:11	5.3		101		1.99		1.53		0.77		44		2.651		2.841
05:14	2.6		101		0.98		0.75		0.76		22		0.944		1.148
05:18	2.9		103		1.1		0.83		0.75		20		1.293		1.451
05:21	3.5		103		1.32		0.93		0.7		23		1.066		1.09
05:23	4.5		103		1.71		1.2		0.71		31		1.265		1.342
05:26	4.4		103		1.66		1.23		0.74		33		1.451		1.564
05:28	4.8		103		1.81		1.34		0.74		36		1.337		1.298
05:30	3.6		106		1.36		1.02		0.75		28		1.018		1.144
05:33	3.7		106		1.38		1.05		0.76		28		1.078		1.155
05:35	4		106		1.49		1.11		0.74		29		1.108		1.05
05:37	3.8		106		1.41		1.06		0.75		29		1.063		1.213
05:39	3.6		106		1.35		1		0.74		27		0.972		1.035
05:42	4.4		105		1.66		1.26		0.76		34		1.369		1.37
05:44	4.1		105		1.54		1.2		0.77		33		1.253		1.351
05:47	3.5		105		1.32		1.04		0.79		28		1.274		1.359
05:49	3.2		105		1.22		0.94		0.77		25		1.074		1.209
05:51	4		106		1.49		1.13		0.76		29		1.099		1.064
05:54	4.4		106		1.65		1.27		0.77		33		1.349		1.379
05:56	3.9		106		1.47		1.15		0.78		32		1.381		1.429
05:59	3.7		106		1.37		1.08		0.79		29		1.229		1.356
06:01	3.8		107		1.43		1.1		0.77		30		1.077		1.134
06:03	4.1		107		1.53		1.19		0.78		32		1.21		1.234
06:06	4		108		1.51		1.16		0.77		31		1.175		1.167
06:08	3.7		108		1.37		1.05		0.76		27		1.057		1.118
06:10	3.1		108		1.15		0.89		0.78		25		1.019		1.376
06:14	4.4		108		1.63		1.33		0.81		35		2.064		1.978
06:16	3.9		109		1.47		1.15		0.79		30		1.284		1.298
06:19	3.9		109		1.45		1.13		0.78		31		1.156		1.238
06:22	3.7		108		1.38		1.09		0.79		28		1.292		1.401
06:24	4.4		109		1.66		1.32		0.8		35		1.593		1.626
06:26	4.3		109		1.6		1.24		0.78		32		1.16		1.167
06:29	4.3		109		1.62		1.28		0.79		35		1.297		1.417
06:32	4.9		110		1.85		1.64		0.89		44		2.676		2.779
06:34	3		110		1.11		0.92		0.82		25		0.856		0.9
06:37	2.4		110		0.9		0.71		0.79		19		0.777		1.067
06:39	3.2		110		1.22		0.9		0.74		23		0.806		0.832
06:41	4.6		108		1.72		1.25		0.73		30		1.015		0.991
06:44	5.2		108		1.96		1.53		0.78		40		1.783		1.875
06:46	4.7		108		1.78		1.41		0.79		38		1.439		1.467
06:48	4.6		108		1.72		1.41		0.82		38		1.403		1.485
06:50	4.3		111		1.61		1.31		0.81		34		1.181		1.208
06:52	4		111		1.49		1.23		0.82		34		1.2		1.262
06:54	4.4		111		1.65		1.37		0.83		36		1.311		1.325
06:56	4		111		1.52		1.24		0.81		34		1.146		1.199
06:58	4.7		111		1.76		1.43		0.81		38		1.172		1.223
07:00	4.2		112		1.59		1.32		0.83		36		1.244		1.28
07:03	3.5		112		1.31		1.11		0.84		32		1.169		1.447
07:05	2.8		112		1.05		0.88		0.84		25		1.015		1.187
07:07	4.4		112		1.64		1.31		0.8		34		1.232		1.061
07:10	4.3		111		1.61		1.31		0.81		35		1.371		1.5
07:12	5.1		111		1.9		1.58		0.83		42		1.414		1.477
07:14	0.1		111		0.02		0.02		0.9		4		0.149		0.939
07:18	5.7		111		2.15		1.6		0.74		37		2.139		1.501
07:20	4.8		113		1.79		1.38		0.77		36		1.257		1.42
07:22	5.1		113		1.93		1.58		0.82		43		1.622		1.642
07:24	4.4		113		1.66		1.41		0.85		39		1.412		1.568
07:26	4		113		1.5		1.27		0.85		35		1.223		1.26
07:28	4.1		113		1.53		1.29		0.84		35		1.209		1.228
07:30	4.4		113		1.66		1.4		0.84		38		1.355		1.453
07:32	3.8		113		1.43		1.19		0.83		32		1.074		1.148
07:35	4.1		113		1.55		1.29		0.84		35		1.257		1.292
07:37	4.4		113		1.65		1.35		0.82		36		1.155		1.134
07:38	4.2		113		1.58		1.3		0.82		36		1.116		1.212
07:40	4.5		113		1.7		1.41		0.83		37		1.261		1.283
07:43	3.2		113		1.19		0.97		0.82		26		0.94		1.164
07:47	4.8		114		1.79		1.5		0.84		37		2.451		1.87
07:48	1.3		114		0.5		0.38		0.76		18		0.448		1.404
07:50	5.6		114		2.12		1.72		0.81		46		1.517		1.151
07:52	5		114		1.89		1.6		0.85		44		1.582		1.654
07:54	4.6		116		1.74		1.51		0.87		43		1.512		1.6
07:56	4.5		116		1.71		1.46		0.86		41		1.243		1.272
07:58	4.7		116		1.76		1.55		0.88		43		1.492		1.524
08:00	4		118		1.51		1.33		0.88		37		1.389		1.521
08:02	4.3		118		1.6		1.37		0.86		37		1.242		1.291
08:05	4.1		120		1.52		1.3		0.85		35		1.228		1.348
08:07	4.3		120		1.63		1.37		0.84		36		1.244		1.292
08:08	4.8		120		1.81		1.51		0.84		42		1.258		1.324
08:10	4.1		120		1.54		1.28		0.83		34		1.103		1.196
08:13	5		120		1.88		1.57		0.84		42		1.5		1.578
08:15	4.7		122		1.77		1.51		0.85		41		1.342		1.441
08:16	4.7		122		1.77		1.51		0.86		40		1.305		1.392
08:19	4.3		122		1.62		1.39		0.85		37		1.293		1.367
08:21	4.7		122		1.78		1.51		0.85		41		1.343		1.428
08:23	4.3		122		1.62		1.37		0.85		37		1.179		1.253
08:24	4.7		122		1.78		1.51		0.85		40		1.306		1.387
08:27	3.9		122		1.45		1.24		0.86		33		1.251		1.43
08:29	4.8		122		1.82		1.5		0.82		37		1.473		1.229
08:33	5.1		123		1.92		1.7		0.89		46		2.693		2.955
08:35	4.4		123		1.63		1.4		0.86		37		1.308		1.424
08:37	4.6		123		1.74		1.46		0.84		38		1.166		1.189
08:39	4.6		123		1.72		1.45		0.84		38		1.263		1.38
08:40	4.9		122		1.83		1.54		0.84		41		1.257		1.347
08:42	5.5		122		2.08		1.78		0.85		46		1.497		1.488
08:44	4.5		122		1.69		1.45		0.86		38		1.264		1.379
08:46	4.9		122		1.85		1.59		0.86		42		1.414		1.498
08:48	4.7		122		1.76		1.53		0.87		41		1.375		1.5
08:50	4.8		122		1.82		1.57		0.86		41		1.369		1.406
08:52	4.6		122		1.71		1.48		0.87		40		1.316		1.408
08:54	5.2		122		1.94		1.67		0.86		43		1.388		1.373
08:56	5		122		1.89		1.64		0.86		44		1.346		1.435
08:58	5.2		122		1.94		1.71		0.88		46		1.418		1.519
09:00	5.1		123		1.93		1.72		0.89		47		1.459		1.487
09:02	4.8		123		1.82		1.62		0.89		43		1.406		1.433
09:04	4.5		123		1.68		1.49		0.88		40		1.248		1.333
09:05	4.1		123		1.56		1.38		0.88		38		1.117		1.257
09:07	1.8		123		0.66		0.55		0.82		18		0.541		0.667
09:10	3.5		123		1.32		1.07		0.81		25		1.333		1.294
09:13	7.5		123		2.8		2.24		0.8		54		2.287		2.153
09:15	6.4		125		2.4		2.05		0.85		54		1.849		2.002
09:17	5		125		1.86		1.68		0.9		46		1.509		1.714
09:19	5		125		1.88		1.72		0.91		47		1.504		1.583
09:21	4.6		126		1.73		1.58		0.91		43		1.381		1.421
09:23	5.2		126		1.96		1.79		0.91		46		1.487		1.497
09:25	5.1		126		1.92		1.74		0.91		46		1.365		1.457
09:26	5		126		1.89		1.74		0.92		45		1.451		1.552
09:28	4.8		126		1.81		1.66		0.92		45		1.337		1.42
09:30	5.1		126		1.92		1.78		0.93		48		1.569		1.589
09:32	4.6		126		1.71		1.58		0.92		44		1.362		1.461
09:34	4.9		126		1.84		1.67		0.91		44		1.296		1.361
09:36	4.1		126		1.56		1.42		0.91		39		1.155		1.326
09:37	5		126		1.87		1.68		0.9		44		1.309		1.3
09:39	5		126		1.87		1.68		0.9		45		1.369		1.415
09:41	4.5		126		1.7		1.52		0.9		42		1.282		1.358
09:43	4.5		126		1.67		1.49		0.89		40		1.234		1.338
09:45	5.9		127		2.21		1.98		0.9		52		1.604		1.527
09:47	4.1		127		1.55		1.38		0.89		39		1.223		1.395
09:49	4.8		127		1.8		1.59		0.88		42		1.286		1.264
09:50	4.7		129		1.78		1.57		0.89		42		1.272		1.379
09:52	4.6		129		1.73		1.54		0.89		40		1.355		1.457
09:56	5.1		129		1.91		1.81		0.95		45		2.651		2.731
09:58	4.6		129		1.72		1.51		0.88		41		1.131		1.277
09:59	4.8		126		1.8		1.59		0.88		41		1.303		1.34
10:01	4.8		126		1.81		1.58		0.87		41		1.352		1.42
10:03	5		126		1.88		1.64		0.87		43		1.378		1.468
10:05	5.6		127		2.1		1.83		0.87		46		1.432		1.476
10:07	5.3		127		1.98		1.79		0.9		48		1.51		1.601
10:09	5.3		127		1.98		1.77		0.89		48		1.344		1.439
10:11	5		129		1.87		1.72		0.92		47		1.431		1.503
10:12	5.3		129		1.97		1.81		0.92		48		1.388		1.449
10:14	5.4		129		2.03		1.85		0.91		48		1.408		1.398
10:16	5		130		1.87		1.74		0.93		47		1.417		1.572
10:18	5.3		130		1.98		1.84		0.93		50		1.424		1.495
10:19	5.7		130		2.12		2		0.94		52		1.508		1.593
10:21	5.8		130		2.18		2.07		0.95		56		1.543		1.576
10:23	5		130		1.88		1.83		0.97		49		1.488		1.522
10:25	5.2		133		1.96		1.85		0.94		48		1.395		1.465
10:26	5		133		1.87		1.76		0.94		48		1.311		1.431
10:28	4.9		133		1.85		1.76		0.95		47		1.304		1.458
10:30	5.3		133		1.98		1.87		0.95		49		1.403		1.415
10:31	5.4		133		2.03		1.93		0.95		52		1.459		1.497
10:33	5.3		133		1.98		1.88		0.95		51		1.475		1.518
10:35	5.2		133		1.96		1.86		0.95		49		1.557		1.624
10:37	5.4		133		2.04		1.91		0.94		50		1.446		1.534
10:38	5.6		133		2.1		1.99		0.95		53		1.439		1.547
10:40	5.4		134		2.04		1.95		0.96		51		1.438		1.537
10:42	5.2		134		1.93		1.86		0.96		51		1.453		1.533
10:44	5.5		134		2.07		2.08		1		56		2.162		2.326
10:46	4.6				1.74		1.72		0.99		47		1.381		1.526
10:48	1.2				0.45		0.42		0.94		15		0.679		1.274
10:51	7.2				2.69		2.26		0.84		47		2.181		1.599
10:53	5.7				2.15		1.88		0.87		47		1.483		1.721
10:55	6.3				2.38		2.21		0.93		59		2.009		2.155
10:57	6.4				2.41		2.28		0.95		62		1.77		1.744
10:59	5.3				2		1.96		0.98		57		1.578		1.758
11:00	5.4				2.02		2		0.99		54		1.642		1.624
11:02	5.2				1.96		1.93		0.98		53		1.57		1.662
11:04	5.2				1.95		1.93		0.99		53		1.627		1.698
11:06	5.3				1.98		1.95		0.98		53		1.575		1.625
11:08	5.5				2.06		2		0.97		53		1.501		1.56
11:09	5.4				2.01		1.98		0.98		53		1.688		1.725
11:11	5.8				2.19		2.16		0.98		57		1.637		1.74
11:13	5				1.88		1.9		1.01		53		1.622		1.787
11:15	5.2				1.97		1.95		0.99		52		1.554		1.656
11:17	5.6				2.08		2.08		1		56		1.668		1.745
11:18	5.3				1.99		2		1.01		55		1.579		1.744
11:20	6				2.25		2.25		1		62		1.716		1.72
11:22	5.7				2.14		2.15		1.01		60		1.63		1.708
11:23	5.3				1.99		2.04		1.02		59		1.644		1.738
11:25	5.5				2.07		2.13		1.03		61		1.648		1.7
11:27	0.7				0.26		0.26		1.01		12		0.472		1.466
11:31	6				2.24		2.01		0.9		44		2.619		2.082
11:33	6.4				2.39		2.25		0.94		57		2.066		2.209
11:35	6.3				2.35		2.26		0.96		62		1.752		1.781
11:36	6				2.25		2.2		0.98		60		1.708		1.742
11:38	4.7				1.78		1.76		0.99		48		1.458		1.563
11:40	5				1.87		1.82		0.97		49		1.402		1.44
11:42	5.3				1.99		1.93		0.97		51		1.516		1.634
11:44	5.9				2.2		2.13		0.97		56		1.611		1.565
11:45	4.9				1.84		1.81		0.98		49		1.475		1.681
11:47	5.6				2.12		2.09		0.99		56		1.693		1.746
11:49	4.8				1.79		1.73		0.97		44		1.237		1.398
11:51	5.9				2.21		2.21		1		57		2.163		2.273
11:53	5.5				2.06		2.01		0.98		56		1.586		1.692
11:55	5.3				1.99		1.97		0.99		52		1.646		1.725
11:56	5				1.87		1.84		0.99		51		1.507		1.649
11:58	5.2				1.94		1.9		0.98		52		1.453		1.543
12:00	5.5				2.06		2.01		0.98		54		1.589		1.615
12:02	5.4				2.04		2.02		0.99		54		1.602		1.614
12:03	5.2				1.97		1.92		0.97		52		1.474		1.517
12:05	5.5				2.06		2.01		0.98		54		1.606		1.666
12:07	5.1				1.92		1.9		0.99		53		1.598		1.758
12:09	5.5				2.07		2.05		0.99		58		1.671		1.754
12:10	5.4		134		2.02		2.03		1.01		57		1.706		1.75
12:12	5		134		1.89		1.92		1.02		55		1.678		1.814
12:14	5.4		134		2.03		2.05		1.01		58		1.692		1.703
12:16	5.1		134		1.91		1.91		1		52		1.52		1.557
12:18	4.5		134		1.7		1.7		1		48		1.409		1.636
12:19	4.6		123		1.74		1.71		0.98		46		1.42		1.496
12:21	5.6		123		2.11		2.05		0.97		54		1.624		1.614
12:23	5.4		123		2.01		2		0.99		55		1.695		1.801
12:25	5.1		136		1.9		1.88		0.99		53		1.652		1.78
12:27	5.2		136		1.95		1.95		0.99		55		1.617		1.706
12:29	5.4		136		2.04		2.06		1.01		57		1.796		1.783
12:30	5.2		136		1.97		1.98		1		57		1.633		1.782
12:34	3.3		136		1.24		1.17		0.94		29		1.55		1.645
12:35	6		136		2.24		2.1		0.94		53		1.703		1.701
12:37	6.4		136		2.39		2.26		0.95		60		1.784		1.814
12:39	5.7		137		2.13		2.12		1		60		1.928		2.09
12:41	5		137		1.86		1.86		1		54		1.598		1.744
12:43	5.6		137		2.09		2.08		1		58		1.627		1.621
12:44	4.8		133		1.8		1.8		1		53		1.577		1.777
12:46	5.3		133		1.97		1.97		1		56		1.604		1.582
12:48	5.4		133		2.01		1.99		0.99		56		1.408		1.503
12:49	5.3		134		1.99		1.98		1		56		1.483		1.573
12:51	5.6		134		2.11		2.11		1		58		1.592		1.64
12:54	4.9		134		1.83		1.93		1.06		51		2.696		2.744
12:56	4.1				1.55		1.46		0.94		41		1.069		1.165
12:57	5.2				1.95		1.77		0.91		48		1.205		1.202
12:59	5.2				1.94		1.77		0.91		49		1.215		1.378
13:00	5.7		137		2.15		1.98		0.92		54		1.487		1.504
13:02	5.7		137		2.15		2.01		0.94		56		1.548		1.654
13:04	5.6		137		2.1		2		0.95		56		1.571		1.581
13:05	4.8				1.81		1.76		0.97		51		1.464		1.661
13:07	4.7				1.78		1.72		0.96		50		1.37		1.488
13:09	6.1				2.28		2.2		0.97		60		1.749		1.635
13:11	5.3				1.98		1.99		1		56		2.097		2.255
13:13	4.8				1.79		1.77		0.99		51		1.63		1.728
13:15	4.6				1.72		1.67		0.97		47		1.394		1.445
13:16	4.9				1.82		1.72		0.95		48		1.416		1.512
13:18	4.9				1.83		1.73		0.95		48		1.46		1.571
13:20	5.2				1.94		1.83		0.94		50		1.467		1.481
13:22	5.6				2.11		1.99		0.94		55		1.61		1.609
13:24	4.7				1.78		1.7		0.95		49		1.389		1.545
13:25	5				1.86		1.78		0.96		51		1.536		1.602
13:27	5				1.89		1.82		0.96		51		1.611		1.691
13:30	2.4				0.88		0.72		0.82		16		0.688		0.842
13:32	7.1				2.67		2.31		0.86		59		1.81		1.938
13:33	6.5				2.44		2.17		0.89		61		1.695		1.795
13:35	5.9				2.2		2.09		0.95		60		1.86		2.045
13:37	5.3				1.98		1.94		0.98		58		1.651		1.848
13:38	5.6				2.1		2.05		0.98		59		1.584		1.534
13:40	5.3				2		1.94		0.97		56		1.532		1.623
13:42	5.1				1.93		1.88		0.97		55		1.47		1.528
13:43	5.3				2		1.95		0.98		57		1.583		1.591
13:45	5.3				1.99		1.96		0.99		58		1.692		1.756
13:47	5.3				1.97		1.97		1		59		1.558		1.677
13:48	5.2				1.97		1.98		1.01		61		1.714		1.739
13:50	4.7				1.75		1.76		1.01		51		1.57		1.695
13:52	4.8				1.8		1.78		0.99		52		1.491		1.618
13:54	4.9				1.83		1.8		0.98		53		1.516		1.593
13:55	4.8				1.79		1.74		0.97		50		1.393		1.484
13:57	5.3				2		1.91		0.96		54		1.422		1.453
13:59	4.8				1.8		1.73		0.96		51		1.514		1.59
14:01	4.7				1.76		1.69		0.96		48		1.494		1.649
14:02	5.7				2.13		2.04		0.96		58		1.606		1.651
14:04	5.1				1.92		1.88		0.98		54		1.734		1.825
14:06	5.2				1.93		1.87		0.97		54		1.622		1.735
14:08	5.2				1.96		1.9		0.97		56		1.518		1.551
14:09	4.7				1.76		1.7		0.97		50		1.471		1.651
14:11	5.1				1.91		1.83		0.96		51		1.454		1.491
14:13	5.5				2.06		1.97		0.96		57		1.465		1.507
14:14	5.3				1.97		1.91		0.97		55		1.506		1.603
14:16	3.9				1.46		1.4		0.96		38		1.174		1.395
14:18	5.2				1.94		1.83		0.95		51		1.468		1.53
14:20	5				1.89		1.78		0.94		51		1.426		1.538
14:21	6				2.24		2.11		0.94		59		1.622		1.586
14:24	5.1				1.92		1.92		1		54		2.216		2.434
14:25	4.8				1.81		1.75		0.97		51		1.512		1.57
14:27	4.8				1.81		1.73		0.95		49		1.422		1.468
14:29	5				1.88		1.76		0.93		49		1.324		1.396
14:30	5.2				1.95		1.83		0.94		52		1.424		1.515
14:32	5.2				1.94		1.82		0.94		51		1.473		1.526
14:34	5.5				2.06		1.97		0.96		56		1.591		1.722
14:36	5.2				1.94		1.8		0.93		50		1.959		1.323
14:38	5.6				2.11		1.99		0.94		54		2.002		2.485
14:40	6.1				2.28		2.13		0.93		62		1.612		1.633
14:42	5.5				2.07		1.99		0.96		59		1.609		1.716
14:43	5.2				1.96		1.93		0.99		57		1.581		1.712
14:45	5.3		134		1.99		1.93		0.97		54		1.439		1.427
14:47	5.3		134		1.98		1.92		0.97		55		1.494		1.573
14:48	4.8		134		1.79		1.74		0.97		51		1.387		1.513
14:50	5.5		134		2.05		2.02		0.99		58		1.584		1.624
14:51	5		134		1.89		1.88		0.99		53		1.497		1.544
14:54	3.1		133		1.18		1.09		0.93		25		1.136		1.291
14:56	5.6		133		2.12		1.93		0.91		52		1.456		1.548
14:58	5.2		133		1.95		1.81		0.93		51		1.458		1.55
14:59	5.1		133		1.91		1.8		0.94		51		1.4		1.467
15:01	5.2		133		1.95		1.87		0.96		53		1.58		1.58
15:03	4.5		133		1.69		1.65		0.98		48		1.549		1.711
15:05	4.9		131		1.85		1.79		0.97		52		1.494		1.504
15:07	4.2		131		1.59		1.53		0.96		43		1.357		1.394
15:08	4.4		131		1.64		1.52		0.93		42		1.201		1.271
15:10	4.8		131		1.8		1.69		0.94		47		1.376		1.361
15:12	4.6		131		1.72		1.64		0.95		46		1.423		1.476
15:14	4.4		131		1.66		1.59		0.96		45		1.337		1.437
15:16	5		125		1.88		1.8		0.96		50		1.494		1.354
15:18	3.5		125		1.31		1.23		0.94		35		1.364		1.606
15:20	4.6		125		1.73		1.64		0.95		47		1.523		1.49
15:22	4.1		125		1.55		1.5		0.97		45		1.38		1.531
15:24	3.5		125		1.31		1.27		0.97		37		1.412		1.387
15:26	4		122		1.49		1.39		0.93		37		1.213		1.264
15:29	3		122		1.11		1.01		0.92		27		1.329		1.418
15:33	3.9		122		1.46		1.37		0.94		34		2.268		2.337
15:35	4.7		122		1.75		1.56		0.89		42		1.243		1.195
15:36	5.2		122		1.95		1.75		0.9		48		1.412		1.376
15:38	5		122		1.86		1.71		0.92		48		1.424		1.4
15:40	4.4		121		1.64		1.55		0.94		44		1.388		1.377
15:42	4.5		121		1.68		1.59		0.95		47		1.336		1.393
15:45	3		122		1.14		1.11		0.97		32		1.447		1.542
15:47	4.3		122		1.63		1.54		0.95		41		1.574		1.427
15:49	4.9		122		1.83		1.72		0.94		47		1.421		1.464
15:51	4.2		120		1.58		1.57		0.99		46		1.652		1.805
15:53	4		120		1.52		1.52		1		44		1.326		1.331
15:55	3.2				1.21		1.2		0.99		35		1.311		1.254
15:57	4.1				1.54		1.51		0.98		43		1.36		1.41
15:59	3.9				1.47		1.46		0.99		42		1.347		1.406
16:01	3.9				1.45		1.44		1		43		1.383		1.341
16:03	3.6				1.37		1.36		0.99		39		1.286		1.328
16:05	3				1.14		1.12		0.98		32		1.382		1.378
16:08	2.9				1.1		0.94		0.85		25		1.293		1.352
16:10	5				1.87		1.67		0.89		46		1.537		1.544
16:12	4.3				1.61		1.52		0.95		45		1.587		1.747
16:14	3.8		120		1.43		1.4		0.98		42		1.364		1.519
16:16	3.7		120		1.38		1.36		0.98		42		1.264		1.289
16:18	3.5		120		1.31		1.31		1		40		1.358		1.396
16:20	4.1		125		1.54		1.51		0.98		44		1.371		1.284
16:22	3.8		125		1.43		1.4		0.98		42		1.229		1.308
16:24	3.7		125		1.39		1.36		0.98		42		1.262		1.312
16:26	3.6		118		1.34		1.32		0.99		40		1.22		1.309
16:27	3.4		118		1.26		1.24		0.98		37		1.199		1.161
16:29	2.5		116		0.92		0.87		0.94		26		0.821		0.935
16:31	3.8		116		1.43		1.32		0.92		39		1.233		1.205
16:33	4.4		116		1.65		1.51		0.91		44		1.307		1.267
16:35	3.8		116		1.44		1.36		0.94		40		1.262		1.325
16:37	3.2		116		1.2		1.13		0.94		33		1.086		1.132
16:39	3.8		116		1.44		1.34		0.93		40		1.326		1.267
16:41	3		115		1.11		1.01		0.91		31		1.032		1.167
16:43	3.7		115		1.38		1.23		0.89		34		1.182		1.074
16:47	3.7		114		1.37		1.36		0.99		38		2.515		2.811
16:49	3.1		114		1.18		1.08		0.92		33		0.885		0.923
16:50	3		113		1.12		1.01		0.9		31		0.862		0.922
16:52	2.9		113		1.1		0.97		0.88		29		0.785		0.816
16:53	3.2		113		1.2		1.05		0.88		33		0.903		1.031
16:55	4.2		112		1.57		1.39		0.89		38		1.244		1.21
16:57	4.1		112		1.55		1.39		0.9		41		1.202		1.266
16:59	3.8		112		1.41		1.29		0.91		40		1.077		1.168
17:01	3.9		112		1.45		1.36		0.93		41		1.235		1.302
17:03	3.6		112		1.35		1.28		0.95		38		1.31		1.24
17:05	3.4		114		1.27		1.15		0.91		35		1.118		1.127
17:06	3.9		114		1.45		1.3		0.9		40		1.007		1.054
17:08	3.9		114		1.46		1.33		0.91		42		1.062		1.158
17:09	4.1		117		1.53		1.42		0.93		43		1.175		1.246
17:11	3.7		117		1.39		1.3		0.94		40		1.243		1.265
17:13	3.8		117		1.43		1.3		0.91		41		1.15		1.169
17:15	3.4		120		1.28		1.15		0.9		35		1.07		1.099
17:16	3.1		120		1.17		1.01		0.86		32		0.933		1.024
17:18	4.6		120		1.74		1.5		0.86		43		1.367		1.287
17:20	4.7		121		1.76		1.53		0.87		46		1.328		1.394
17:22	4.1		121		1.55		1.36		0.88		43		1.249		1.327
17:24	3.6		121		1.33		1.17		0.88		38		1.178		1.258
17:25	4.5				1.71		1.49		0.87		43		1.347		1.339
17:27	4.7				1.78		1.5		0.84		45		1.3		1.258
17:29	4.1				1.52		1.28		0.84		40		1.056		1.183
17:30	4.2				1.58		1.33		0.84		42		1.156		1.241
17:32	3.5				1.32		1.1		0.84		34		1.099		1.188
17:34	4.9				1.84		1.5		0.81		44		1.216		1.216
17:36	4.4				1.65		1.37		0.83		41		1.331		1.408
17:38	5				1.89		1.55		0.82		45		1.338		1.335
17:40	4.9				1.85		1.52		0.83		45		1.321		1.409
17:41	3.6				1.35		1.08		0.8		31		0.916		0.981
17:43	6				2.24		1.89		0.84		56		1.972		1.995
17:46	5.1				1.93		1.69		0.88		51		1.797		1.94
17:47	5.5				2.05		1.84		0.9		56		1.757		1.811
17:49	4.6				1.72		1.58		0.92		49		1.542		1.698
17:51	4.6				1.72		1.54		0.9		47		1.372		1.367
17:53	4.7				1.77		1.56		0.88		47		1.238		1.347
17:54	4.7				1.78		1.57		0.88		46		1.328		1.378
17:56	5.7				2.13		1.86		0.88		54		1.442		1.431
17:58	4.5				1.7		1.51		0.88		45		1.349		1.487
17:59	5.4				2.04		1.83		0.89		53		1.427		1.485
18:01	5				1.86		1.68		0.9		50		1.35		1.453
18:03	2.6				0.97		0.86		0.89		29		0.94		1.372
18:05	6.7				2.53		2.21		0.87		59		1.652		1.406
18:06	5.9				2.22		1.97		0.89		56		1.54		1.6
18:08	5				1.89		1.76		0.93		54		1.682		1.825
18:10	5.1				1.9		1.72		0.91		49		1.666		1.651
18:13	3.4				1.28		1.16		0.91		34		1.504		1.541
18:15	6.5		121		2.44		2.05		0.84		55		1.636		1.542
18:16	5.3		121		1.99		1.7		0.85		48		1.405		1.595
18:18	6.3		121		2.36		2.09		0.88		61		1.714		1.793
18:20	6.3		118		2.35		2.16		0.92		65		1.898		1.89
18:21	4.8		118		1.81		1.72		0.95		53		1.515		1.782
18:23	5.5		118		2.07		1.97		0.95		60		1.651		1.617
18:25	5.1				1.9		1.79		0.94		53		1.505		1.594
18:26	4.9				1.82		1.71		0.94		53		1.429		1.604
18:28	5.7				2.14		2		0.94		56		1.569		1.477
18:30	4.9				1.84		1.75		0.95		49		1.476		1.606
18:32	4.8				1.79		1.65		0.92		48		1.381		1.467
18:33	6				2.26		2.08		0.92		58		1.594		1.608
18:35	5.1				1.91		1.78		0.93		53		1.389		1.601
18:36	4.9				1.85		1.73		0.94		52		1.415		1.527
18:38	6.1				2.27		2.15		0.94		62		1.759		1.694
18:40	4.7				1.77		1.65		0.93		47		1.348		1.406
18:42	5.6				2.11		1.94		0.92		56		1.518		1.585
18:43	5.3				1.99		1.85		0.93		51		1.487		1.604
18:45	6.1				2.28		2.17		0.95		63		1.794		1.92
18:47	5.9				2.21		2.12		0.96		64		1.664		1.739
18:48	5.4				2.03		2		0.98		62		1.715		1.751
18:50	5				1.87		1.95		1.04		60		2.015		2.449
18:52	5.4				2.02		2.04		1.01		61		1.307		1.295
18:53	5				1.86		1.89		1.01		58		1.557		1.551
18:55	4.8				1.81		1.78		0.98		53		1.408		1.426
18:56	4.3				1.6		1.55		0.97		49		1.054		1.444
19:00	3				1.12		1.03		0.92		25		1.711		1.674
19:02	7.4				2.79		2.47		0.89		62		1.823		1.622
19:04	4.4				1.64		1.49		0.91		37		1.446		1.82
19:06	7.4				2.78		2.53		0.91		67		1.742		1.722
19:08	5.4				2.03		1.88		0.93		50		1.713		1.715
19:10	5.1				1.9		1.84		0.97		49		1.868		1.972
19:12	6				2.25		2.17		0.96		60		1.648		1.7
19:14	4.1				1.53		1.52		0.99		39		1.475		1.873
19:16	6.4				2.41		2.36		0.98		61		1.794		1.602
19:17	5.3				1.99		1.96		0.99		54		1.611		1.645
19:19	4.6				1.71		1.7		0.99		45		1.402		1.65
19:21	5.6				2.1		2.06		0.98		58		1.598		1.652
19:23	5.8				2.16		2.17		1		63		1.754		1.694
19:24	5.1				1.93		2		1.03		65		1.764		1.917
19:26	4.7				1.78		1.88		1.06		61		1.463		1.556
19:27	4.3				1.62		1.73		1.07		57		1.442		1.452
19:29	4.1				1.54		1.65		1.07		51		1.264		1.375
19:30	4.4				1.65		1.79		1.08		54		1.557		1.431
19:32	3.8				1.44		1.58		1.1		48		1.448		1.485
19:34	3.2				1.22		1.3		1.07		40		1.15		1.216
19:36	3.5				1.3		1.4		1.08		41		1.378		1.387
19:38	3.4				1.28		1.34		1.05		40		1.223		1.278
19:40	3.9				1.45		1.56		1.07		46		1.407		1.38
19:44	2.2				0.83		0.89		1.07		24		1.566		1.78
19:46	2				0.74		0.74		1		21		0.982		0.899
19:48	5.5				2.07		2.12		1.03		56		1.779		1.713
19:52	2.4				0.92		0.99		1.07		27		1.882		2.129
19:55	3.6				1.37		1.48		1.08		41		1.527		1.404
19:57	3.7				1.38		1.49		1.09		46		1.529		1.417
19:59	3.9				1.47		1.63		1.11		50		1.605		1.472
20:00	2.7				1.02		1.14		1.12		38		1.133		1.294
20:02	2.9				1.09		1.19		1.09		38		1.11		1.166
20:04	3.3				1.23		1.33		1.08		39		1.124		1.054
20:06	3.1				1.16		1.26		1.08		38		1.277		1.304
20:07	3.2				1.22		1.33		1.09		43		1.117		1.266
20:11	2.1				0.79		0.87		1.1		26		1.504		1.445
20:13	3.1				1.16		1.26		1.08		38		1.221		1.189
20:16	1.3				0.49		0.51		1.04		16		0.926		0.981
20:18	3.4				1.26		1.31		1.04		38		1.418		1.302
20:20	2.8				1.03		1.1		1.06		36		1.161		1.241
20:22	3.2				1.2		1.33		1.11		42		1.373		1.368
20:24	2.4				0.92		1.03		1.12		33		1.133		0.997
20:26	3				1.12		1.3		1.17		44		1.204		1.342
20:28	2.6				0.99		1.2		1.21		40		1.214		1.137
20:30	1.7				0.64		0.77		1.21		27		0.938		0.888
20:32	2				0.74		0.88		1.19		30		1.02		1.073
20:37	1.3				0.5		0.57		1.14		15		1.191		1.338
20:39	2.6				0.96		1.08		1.13		34		1.224		1.202
20:41	1.9				0.72		0.83		1.16		27		1.115		1.214
20:46	1.2				0.43		0.48		1.11		15		1.208		1.139
20:50	2.6				0.96		0.99		1.03		27		1.616		0.915
20:52	2				0.75		0.84		1.13		30		1.198		1.803
20:54	2				0.76		0.9		1.18		34		1.243		1.26
20:56	1.5				0.55		0.68		1.22		28		0.77		1.027
20:59	1.8				0.66		0.84		1.27		29		1.261		1.087
21:02	1.3				0.48		0.6		1.24		20		1.255		1.057
21:05	1.3				0.49		0.57		1.16		20		0.723		0.71
21:10	1.2				0.46		0.45		0.99		13		1.252		0.895
21:12	2.5				0.94		0.87		0.93		28		1.008		1.077
21:17	1.7				0.62		0.6		0.96		19		1.414		1.313
21:19	4.4				1.64		1.56		0.95		48		1.687		1.626
21:24	2.5				0.92		1.04		1.12		35		2.621		2.759
21:26	1.2				0.46		0.46		1.01		16		0.606		0.546
21:28	1.5				0.57		0.56		0.98		19		0.626		0.747
21:30	2.4				0.91		0.89		0.99		29		0.909		0.836
21:33	1.6				0.58		0.58		0.99		19		0.965		0.826
21:35	2.6		106		0.99		0.99		0.99		30		1.142		1.159
21:37	1.9		106		0.71		0.71		1		24		0.872		0.945
21:39	1.7		106		0.64		0.64		1		21		0.83		0.8
21:42	1.8		106		0.68		0.68		1		23		0.924		0.906
21:44	1.8		106		0.68		0.68		1		23		0.839		0.834
21:47	1.4		103		0.52		0.53		1.02		18		0.931		1.014
21:52	1.8		103		0.66		0.63		0.95		18		1.367		1.151
21:55	1.9		106		0.7		0.67		0.96		22		1.167		1.043
21:57	1.9		106		0.71		0.69		0.98		23		0.935		0.943
22:00	1.5		107		0.56		0.54		0.96		17		0.838		0.682
22:03	1.9		107		0.71		0.68		0.95		22		1.003		1.082
22:05	2.1		105		0.79		0.76		0.96		26		0.915		0.943
22:08	2		105		0.77		0.76		1		26		1.023		0.931
22:10	1		103		0.36		0.35		0.98		14		0.511		0.642
22:12	1.7		103		0.65		0.64		0.99		22		0.908		0.781
22:15	1.8		103		0.68		0.68		1.01		23		0.97		0.989
22:17	1.6		103		0.61		0.62		1.02		21		0.904		0.908
22:20	1.2		102		0.45		0.45		1.02		17		0.719		0.742
22:23	1.6		102		0.59		0.59		1.01		19		0.995		0.796
22:25	0.4		101		0.17		0.15		0.92		8		0.279		0.358
22:28	1.5		101		0.58		0.54		0.94		18		0.885		0.778
22:33	0.9		100		0.32		0.28		0.86		9		0.699		0.451
22:35	2.3		101		0.86		0.74		0.86		24		0.914		1.139
22:37	2.2		101		0.83		0.76		0.92		27		0.922		1.064
22:41	2.1		104		0.79		0.84		1.06		30		2.051		2.139
22:44	1.6		104		0.62		0.65		1.05		24		0.97		0.802
22:48	1.3		100		0.49		0.54		1.11		18		1.297		1.291
22:51	1.1		96		0.42		0.43		1.03		14		0.775		0.774
22:54	1.2		99		0.43		0.43		0.99		13		0.707		0.686
22:57	1.9		99		0.7		0.67		0.95		21		0.829		0.716
23:00	2.4		101		0.89		0.92		1.03		30		1.732		1.712
23:03	1.3		101		0.48		0.48		1.01		18		0.811		0.829
23:05	1.6		102		0.6		0.59		0.99		20		0.763		0.65
23:08	1.3		102		0.49		0.5		1.01		16		0.729		0.793
23:12	1.5		105		0.57		0.61		1.08		22		1.332		1.503
23:15	0.6		105		0.24		0.25		1.03		10		0.48		0.485
23:17	0.9		105		0.35		0.33		0.95		12		0.484		0.322
23:20	1.6		100		0.61		0.58		0.94		18		0.841		0.628
23:23	2.2		100		0.84		0.83		0.99		27		1.264		1.27
23:25	1.4		100		0.54		0.53		0.99		19		0.819		0.812
23:30	1.5		101		0.57		0.55		0.96		16		1.157		0.76
23:32	1.1		101		0.41		0.39		0.95		14		0.53		0.882
23:34	1		101		0.39		0.38		0.97		15		0.553		0.855
23:37	1.9		101		0.73		0.71		0.97		23		1.188		0.817
23:40	0.6		101		0.22		0.2		0.93		9		0.367		0.443
23:43	1.2		101		0.44		0.41		0.93		15		0.721		0.773
23:45	1.1		99		0.42		0.38		0.92		13		0.634		0.616
23:48	1.8		99		0.67		0.61		0.91		20		0.9		0.731
23:51	2.1		97		0.8		0.74		0.92		23		0.997		0.855
23:53	2.3		97		0.87		0.81		0.93		26		0.864		0.853
23:57	1.6		98		0.6		0.56		0.92		14		1.002		1.191
23:59	2.7		101		1.02		0.92		0.91		27		0.969		0.874
24:01	2.3		101		0.86		0.8		0.93		25		0.976		1.043
24:04	2.3		101		0.86		0.79		0.92		25		0.926		0.894
24:06	2.8		104		1.04		0.99		0.95		31		1.185		1.16
24:10	2.5		104		0.95		1		1.05		32		1.833		1.819
24:12	2		104		0.75		0.74		0.99		23		0.903		0.904
24:14	2.6		104		0.99		0.97		0.98		29		1.012		1.047
24:16	3		103		1.12		1.13		1.01		35		1.363		1.38
24:18	2.2		103		0.84		0.8		0.96		26		0.927		0.975
24:20	2.5		104		0.93		0.87		0.94		28		0.988		0.965
24:23	2.5		104		0.92		0.86		0.93		27		1.063		1.131
24:25	2.8				1.04		0.92		0.89		27		1.043		0.969
24:27	3.4				1.28		1.12		0.87		34		1.16		1.196
24:29	3.3		104		1.23		1.08		0.88		33		1.122		1.216
24:31	2.6		104		0.96		0.82		0.86		25		0.877		1.006
24:33	3.7		104		1.37		1.16		0.84		35		1.208		1.244
24:35	3				1.12		0.92		0.82		29		1.009		1.026
24:37	2.6				0.98		0.78		0.8		26		0.831		1.026
24:39	3.7				1.39		1.1		0.79		35		1.114		1.18
24:42	4.3				1.62		1.37		0.85		43		2.174		2.183
24:44	3.8				1.44		1.19		0.83		40		1.332		1.371
24:46	3.6				1.36		1.1		0.81		33		1.039		1.103
24:48	3.7				1.38		1.09		0.79		32		1.145		1.178
24:52	4.8		112		1.79		1.51		0.84		45		2.8		2.761
24:54	2.3		112		0.88		0.67		0.77		23		0.776		0.989
24:56	4.1		112		1.54		1.16		0.75		33		1.164		1.118
24:59	4.5		112		1.69		1.26		0.74		33		1.282		1.33
25:01	4.7		112		1.77		1.31		0.74		39		1.336		1.394
25:03	4.8		112		1.8		1.34		0.74		40		1.214		1.309
25:04	5.4		113		2.03		1.54		0.76		45		1.346		1.357
25:06	5.7		113		2.16		1.71		0.79		52		1.738		1.683
25:08	4.7		113		1.76		1.42		0.81		44		1.35		1.532
25:10	4.7		116		1.77		1.42		0.8		42		1.296		1.266
25:12	4.8		116		1.81		1.48		0.82		44		1.3		1.455
25:14	5		116		1.88		1.55		0.82		46		1.374		1.402
25:15	5.2		129		1.94		1.59		0.82		47		1.362		1.374
25:17	4.7		129		1.77		1.48		0.84		45		1.33		1.466
25:19	5.4		129		2.01		1.67		0.83		50		1.371		1.332
25:20	5		130		1.86		1.54		0.83		46		1.231		1.304
25:22	5.1		130		1.91		1.62		0.85		48		1.366		1.397
25:24	5		130		1.87		1.59		0.85		47		1.404		1.44
25:26	4.9		131		1.85		1.56		0.84		46		1.306		1.423
25:27	5.1		131		1.92		1.63		0.85		47		1.334		1.402
25:29	5.3		131		1.98		1.66		0.84		49		1.36		1.346
25:31	5.5		134		2.08		1.76		0.85		52		1.422		1.466
25:32	5.5		134		2.05		1.76		0.86		51		1.402		1.453
25:34	5.3		134		2		1.72		0.86		51		1.323		1.43
25:35	4.7		136		1.77		1.55		0.88		48		1.262		1.445
25:38	3.5		136		1.3		1.13		0.87		34		1.416		1.448
25:40	6.5		137		2.44		2.06		0.85		57		1.783		1.757
25:41	6		137		2.25		1.92		0.85		57		1.513		1.532
25:43	6		137		2.26		1.95		0.87		59		1.548		1.562
25:44	5.2		137		1.93		1.71		0.88		52		1.372		1.489
25:46	5.4		137		2.04		1.83		0.89		56		1.463		1.552
25:48	5.6		137		2.09		1.87		0.89		56		1.582		1.532
25:49	5.3		139		1.98		1.76		0.89		52		1.478		1.479
25:51	5.2		139		1.94		1.74		0.89		51		1.396		1.554
25:53	5.8		139		2.17		1.94		0.9		57		1.514		1.557
25:54	5.7		139		2.14		1.93		0.9		57		1.414		1.49
25:56	5.2		139		1.96		1.78		0.91		53		1.342		1.488
25:57	5.9		139		2.2		2		0.91		59		1.499		1.478
25:59	5.2		139		1.97		1.81		0.92		53		1.421		1.515
26:00	5.2		141		1.95		1.79		0.92		53		1.404		1.502
26:02	5.4		141		2.03		1.89		0.93		56		1.605		1.656
26:03	5.5		141		2.07		1.88		0.91		56		1.299		1.361
26:05	5.3		141		1.99		1.86		0.94		57		1.481		1.606
26:07	5.1		141		1.91		1.79		0.94		54		1.489		1.508
26:08	5.1		141		1.92		1.79		0.93		55		1.402		1.561
26:10	5.4		141		2.02		1.92		0.95		57		1.597		1.605
26:13	4.2		141		1.57		1.42		0.91		33		1.618		1.666
26:15	6.1		142		2.29		2.09		0.91		62		1.722		1.842
26:16	6.2		142		2.33		2.14		0.92		61		1.862		1.762
26:19	5.2		142		1.95		1.88		0.97		54		2.558		2.71
26:21	5.1		142		1.91		1.75		0.92		53		1.531		1.716
26:23	5.3		142		2		1.8		0.9		53		1.473		1.487
26:24	5.6				2.12		1.9		0.9		54		1.476		1.557
26:26	6.2				2.34		2.14		0.92		61		1.689		1.722
26:28	6.1				2.28		2.14		0.94		64		1.717		1.798
26:30	5.5				2.08		2.05		0.98		62		2.108		2.294
26:31	5.7				2.14		2.04		0.95		60		1.583		1.571
26:33	5.2				1.97		1.88		0.95		57		1.565		1.673
26:35	5.2		146		1.97		1.87		0.95		54		1.539		1.573
26:36	5.4		146		2.04		1.9		0.93		56		1.486		1.597
26:38	5.9		146		2.22		2.09		0.94		60		1.668		1.658
26:39	5.8		148		2.17		2.05		0.95		59		1.681		1.812
26:41	6		148		2.23		2.1		0.94		61		1.685		1.693
26:43	5.4		148		2.04		2.01		0.99		63		2.097		2.303
26:45	5.9		148		2.22		2.15		0.97		64		1.613		1.731
26:46	5.5		148		2.06		1.99		0.97		60		1.664		1.672
26:48	5.5		148		2.07		2.01		0.97		62		1.653		1.776
26:50	6		148		2.25		2.19		0.97		65		1.73		1.769
26:51	5.4		148		2.04		2.03		1		63		1.826		1.997
26:53	5.4		148		2.04		2		0.98		59		1.565		1.668
26:54	5.7		148		2.13		2.05		0.97		60		1.42		1.481
26:56	5.3		148		1.98		1.9		0.96		55		1.333		1.474
26:57	5.6		148		2.09		2		0.96		60		1.465		1.569
26:59	6.2		148		2.32		2.22		0.96		65		1.604		1.543
27:00	5.7		148		2.13		2.06		0.97		61		1.686		1.71
27:02	5		148		1.88		1.79		0.95		51		1.391		1.531
27:04	5.8		148		2.19		2.07		0.95		60		1.542		1.656
27:05	5.7		146		2.16		2.04		0.95		60		1.538		1.575
27:07	5.7		146		2.15		2.05		0.96		61		1.531		1.66
27:08	5.6		146		2.1		2.01		0.96		59		1.417		1.493
27:10	5.7		146		2.13		2.06		0.97		61		1.546		1.642
27:11	5.5		146		2.08		1.97		0.95		57		1.391		1.429
27:13	5.2		146		1.96		1.86		0.95		56		1.436		1.517
27:14	5.2		146		1.96		1.82		0.93		51		1.329		1.42
27:15	6.1		146		2.3		2.17		0.94		66		1.482		1.626
27:17	6.1		146		2.31		2.2		0.95		63		1.677		1.648
27:18	5.6		146		2.1		1.98		0.94		60		1.474		1.562
27:20	5.9		146		2.2		2.07		0.94		63		1.467		1.536
27:21	5.7		146		2.14		2.06		0.96		64		1.532		1.634
27:23	6.3		146		2.35		2.25		0.96		67		1.633		1.566
27:25	3.5		148		1.32		1.22		0.93		37		1.403		1.633
27:27	6.4		148		2.4		2.19		0.91		59		1.571		1.551
27:28	5.8		148		2.18		1.94		0.89		55		1.303		1.398
27:30	5.5		150		2.05		1.85		0.9		51		1.347		1.407
27:32	3.5		150		1.31		1.14		0.87		34		1.2		1.379
27:33	7.1		150		2.67		2.29		0.86		58		1.486		1.378
27:35	6.1		150		2.29		1.99		0.87		56		1.436		1.59
27:36	7.2		150		2.69		2.34		0.87		66		1.701		1.627
27:38	5.8		150		2.16		1.91		0.88		56		1.452		1.606
27:39	6.6		148		2.47		2.22		0.9		63		1.583		1.628
27:41	6.9		148		2.58		2.39		0.93		71		1.747		1.773
27:42	6.1		148		2.3		2.18		0.95		68		1.751		1.829
27:44	5.9		148		2.21		2.14		0.97		68		1.722		1.864
27:45	5.5		150		2.06		2.03		0.99		67		1.631		1.73
27:47	6.1		150		2.27		2.23		0.98		70		1.51		1.594
27:48	5.8		150		2.19		2.16		0.99		67		1.66		1.642
27:50	5.7		150		2.16		2.13		0.99		67		1.538		1.606
27:51	5.9		150		2.2		2.2		1		70		1.502		1.575
27:52	6		150		2.26		2.25		1		70		1.508		1.486
27:54	4.9		150		1.84		1.84		1		56		1.644		1.636
27:55	5.7		151		2.15		2.06		0.96		64		1.474		1.607
27:57	6.4		151		2.41		2.33		0.96		71		1.508		1.635
27:58	6.7		151		2.52		2.47		0.98		74		1.596		1.535
27:59	6		151		2.27		2.25		0.99		67		1.563		1.626
28:01	6		151		2.26		2.23		0.99		70		1.688		1.751
28:02	5.6		151		2.09		2.07		0.99		65		1.585		1.639
28:04	5.7		151		2.13		2.08		0.98		62		1.502		1.567
28:05	5.9		151		2.23		2.18		0.98		68		1.502		1.624
28:06	6.2		151		2.34		2.3		0.98		70		1.522		1.512
28:08	6.1		151		2.29		2.26		0.99		68		1.596		1.673
28:09	6.1		151		2.29		2.26		0.98		68		1.608		1.662
28:10	5.6		151		2.11		2.1		1		66		1.532		1.678
28:12	5.7		151		2.15		2.12		0.98		64		1.627		1.61
28:13	5.5		151		2.06		2.02		0.98		63		1.48		1.685
28:15	6.6		153		2.49		2.44		0.98		72		1.631		1.567
28:16	5.7		153		2.15		2.13		0.99		66		1.66		1.786
28:18	5.8		153		2.17		2.15		0.99		66		1.512		1.617
28:19	6		153		2.27		2.27		1		69		1.573		1.69
28:20	6		153		2.25		2.24		0.99		68		1.626		1.698
28:22	6.2		153		2.34		2.34		1		71		1.606		1.628
28:23	5.9		153		2.23		2.24		1		69		1.545		1.741
28:25	5.9		153		2.21		2.24		1.01		69		1.712		1.71
28:26	6.3		153		2.36		2.38		1.01		72		1.703		1.743
28:27	6		153		2.27		2.28		1		68		1.567		1.641
28:29	5.9		153		2.21		2.21		1		67		1.561		1.638
28:30	5.9		155		2.22		2.22		1		66		1.472		1.556
28:32	6.3		155		2.36		2.37		1		73		1.695		1.778
28:33	6.1		155		2.28		2.31		1.01		72		1.669		1.725
28:34	6.2		155		2.31		2.35		1.02		72		1.707		1.779
28:36	6.2		155		2.34		2.39		1.02		72		1.651		1.709
28:37	6.1		155		2.28		2.33		1.02		73		1.635		1.684
28:38	5.4		155		2.04		2.09		1.03		65		1.466		1.653
28:40	6.1		155		2.28		2.33		1.02		70		1.602		1.652
28:41	6.3		155		2.37		2.43		1.03		73		1.617		1.685
28:43	6.4		155		2.4		2.49		1.03		75		1.685		1.714
28:44	6		155		2.24		2.32		1.04		69		1.638		1.747
28:45	6.4		157		2.4		2.49		1.03		74		1.644		1.697
28:47	6.2		157		2.32		2.43		1.05		74		1.728		1.819
28:48	6.5		157		2.43		2.57		1.06		77		1.779		1.847
28:49	6.1		157		2.3		2.43		1.06		74		1.621		1.756
28:51	6.2		157		2.33		2.47		1.06		74		1.607		1.67
28:52	6.5		157		2.43		2.57		1.06		78		1.696		1.782
28:53	6.5		157		2.46		2.61		1.06		77		1.72		1.708
28:56	3.8		157		1.44		1.43		0.99		33		1.296		1.617
28:57	7.1		157		2.67		2.67		1		74		1.845		1.934
28:59	6		157		2.27		2.31		1.02		72		1.58		1.891
29:00	5.5		160		2.06		2.09		1.02		56		1.661		1.696
29:00	Recovery
29:02	6.9		160		2.6		2.67		1.03		80		1.746		1.791
29:04	6.3		160		2.35		2.54		1.08		70		2.608		2.768
29:05	6.5		160		2.42		2.54		1.05		78		1.55		1.748
29:06	6.5		160		2.44		2.6		1.07		81		1.679		1.637
29:08	6.4		160		2.42		2.6		1.08		80		1.73		1.794
29:09	5.9		160		2.22		2.41		1.09		77		1.811		1.846
29:10	5.8		157		2.17		2.36		1.09		75		1.694		1.786
29:12	5.6		157		2.09		2.28		1.09		72		1.687		1.762
29:13	5.3		157		2		2.14		1.07		64		1.559		1.764
29:15	6.3		157		2.37		2.55		1.07		75		1.928		1.973
29:16	5.7		157		2.15		2.33		1.08		74		1.693		1.835
29:18	6		157		2.23		2.42		1.08		74		1.665		1.724
29:19	6		157		2.26		2.46		1.09		75		1.723		1.756
29:20	5.7		157		2.12		2.31		1.09		74		1.678		1.747
29:22	5.7		157		2.13		2.33		1.09		71		1.69		1.779
29:23	5.6		157		2.12		2.32		1.09		71		1.628		1.787
29:24	5.6		155		2.11		2.27		1.07		67		1.54		1.531
29:26	6.1		155		2.28		2.42		1.06		70		1.562		1.621
29:27	5.7		155		2.13		2.27		1.06		68		1.494		1.607
29:28	5.6		155		2.1		2.21		1.05		67		1.499		1.506
29:30	5.9		155		2.2		2.35		1.07		69		1.581		1.682
29:31	6.2		155		2.32		2.5		1.08		75		1.692		1.697
29:33	5.5		155		2.05		2.24		1.09		70		1.607		1.728
29:34	5.6		155		2.1		2.29		1.09		69		1.599		1.583
29:35	5.4		153		2.02		2.2		1.09		66		1.686		1.744
29:37	5.3		153		1.97		2.14		1.08		65		1.505		1.603
29:38	5.7		153		2.14		2.35		1.1		69		1.677		1.698
29:40	5.5		151		2.07		2.27		1.1		67		1.643		1.726
29:41	5.2		151		1.97		2.19		1.11		66		1.527		1.645
29:43	5.7		151		2.12		2.38		1.12		72		1.787		1.733
29:44	4.8		151		1.81		2.03		1.13		63		1.504		1.703
29:46	5.2		150		1.93		2.19		1.13		67		1.637		1.615
29:47	4.9		150		1.85		2.09		1.13		64		1.411		1.51
29:48	5		150		1.87		2.13		1.14		64		1.435		1.505
29:51	4.5		148		1.69		1.97		1.17		57		2.241		2.312
29:52	4.8		148		1.81		2.06		1.14		62		1.471		1.562
29:53	4.5		148		1.67		1.89		1.13		56		1.39		1.409
29:55	4.6		146		1.74		1.96		1.13		58		1.451		1.509
29:56	4.7		146		1.76		1.97		1.12		58		1.465		1.429
29:58	4.4		146		1.64		1.82		1.11		55		1.362		1.468
29:59	4.8		142		1.78		2		1.12		60		1.499		1.559
30:01	4.9		142		1.85		2.12		1.15		64		1.589		1.649
30:02	5.1		142		1.9		2.22		1.17		72		1.832		1.756
30:04	4.1		142		1.54		1.85		1.2		60		1.488		1.646
30:06	4.1		142		1.54		1.85		1.2		59		1.616		1.568
30:07	3.8		142		1.44		1.69		1.17		52		1.364		1.448
30:09	3.9		142		1.47		1.72		1.17		54		1.268		1.386
30:10	4.2		141		1.59		1.85		1.16		56		1.468		1.344
30:12	4.1		141		1.52		1.71		1.13		51		1.48		1.436
30:23			137						1.02						1.127
30:38			133
30:54			129
31:10			121
31:26			122
31:41			120
31:57			115
32:13			113
32:28			113
32:44			117
	4.46983	2.0315	125.779	380.32	1.67772	0.286046	1.57431	0.296561	0.936214	0.0103046	45.48	248.694	1.4008	0.11996	1.45695	0.126847
	METS						HR						VO2						VCO2						RER						VE						Vtex						Vtin						LABEL
	Rest		Test		Recovery		Rest		Test		Recovery		Rest		Test		Recovery		Rest		Test		Recovery		Rest		Test		Recovery		Rest		Test		Recovery		Rest		Test		Recovery		Rest		Test		Recovery
	MEDIA	VAR	MEDIA	VAR	MEDIA	VAR	MEDIA	VAR	MEDIA	VAR	MEDIA	VAR	MEDIA	VAR	MEDIA	VAR	MEDIA	VAR	MEDIA	VAR	MEDIA	VAR	MEDIA	VAR	MEDIA	VAR	MEDIA	VAR	MEDIA	VAR	MEDIA	VAR	MEDIA	VAR	MEDIA	VAR	MEDIA	VAR	MEDIA	VAR	MEDIA	VAR	MEDIA	VAR	MEDIA	VAR	MEDIA	VAR	BIN
	1.23333	0.0642424	4.41328	2.07506	5.33878	0.57034	74.7333	5.49524	123.357	348.054	146.797	170.027	0.468333	0.00879697	1.65665	0.292324	2.00143	0.0797208	0.38	0.00674545	1.53325	0.284254	2.20531	0.0626588	0.813333	0.000878788	0.925033	0.00887024	1.1046	0.00167433	11.5833	5.35606	44.0797	228.972	67	59.3333	0.807583	0.056349	1.38645	0.121385	1.6212	0.0473108	0.87075	0.105007	1.44274	0.128262	1.67084	0.0579359	1
	1.23333	0.0642424	4.41328	2.07506	5.33878	0.57034	74.7333	5.49524	123.357	348.054	146.797	170.027	0.468333	0.00879697	1.65665	0.292324	2.00143	0.0797208	0.38	0.00674545	1.53325	0.284254	2.20531	0.0626588	0.813333	0.000878788	0.925033	0.00887024	1.1046	0.00167433	11.5833	5.35606	44.0797	228.972	67	59.3333	0.807583	0.056349	1.38645	0.121385	1.6212	0.0473108	0.87075	0.105007	1.44274	0.128262	1.67084	0.0579359	1
[truncated: 1 more columns]
