# Supplementary material for: On the development of diagnostic support algorithms based on CPET biosignals data via machine learning and wavelets
Source: PeerJ journal article supplement (doi:10.7717/peerj-cs.2474), 2025-01-30
Supplement: raw_data.zip [file Subject24_BxB.xlsx]

## Sheet: Demographics
Gender:	female
Age:	67
Height (cm):	172
Weight (kg):	116.8
BMI:	39
Condition:	Metabolic Syndrome

## Sheet: Subject24_BxB
Time	METS		HR		V'O2		V'CO2		RER		V'E		VTex		VTiF
min			1/min		L/min		L/min				L/min		L		L
00:00	Rest
03:47
03:50	1.3		81		0.55		0.51		0.93		21		0.89		1.327
03:53	1.3		81		0.55		0.51		0.93		21		1.095		0.9
03:55	1.3		81		0.52		0.49		0.94		21		0.891		0.935
03:58	1		81		0.41		0.39		0.94		17		0.727		0.776
04:00	1		80		0.41		0.38		0.93		18		0.587		0.653
04:02	1.3		80		0.54		0.52		0.96		23		0.936		0.922
04:04	1.1		80		0.46		0.44		0.95		21		0.677		0.634
04:06	1.3		80		0.54		0.51		0.95		23		0.803		0.782
04:11	1.1		81		0.47		0.45		0.96		17		1.429		1.378
04:15	0.8		83		0.34		0.32		0.94		12		0.831		1.02
04:18	0.7		83		0.3		0.27		0.91		12		0.557		0.56
04:22	0.8		82		0.34		0.31		0.9		12		0.779		0.766
04:26	1.2		77		0.48		0.43		0.9		17		1.029		1.12
04:29	1.1		77		0.46		0.41		0.91		17		0.902		0.867
04:31	1		75		0.39		0.35		0.89		18		0.567		0.613
04:31	Test
04:33	1.1		75		0.46		0.41		0.91		20		0.673		0.707
04:35	1.1		75		0.44		0.41		0.94		20		0.683		0.84
04:37	1.5		75		0.63		0.61		0.98		29		1.019		1.026
04:40	1.5		76		0.6		0.6		1		26		1.489		1.177
04:43	0.4		76		0.16		0.15		0.93		8		0.403		0.575
04:47	0.9		78		0.38		0.34		0.89		12		0.692		0.838
04:50	1.3		80		0.54		0.47		0.86		17		0.944		0.949
04:54	1		81		0.43		0.35		0.83		13		0.842		0.794
04:56	2.5		81		1.04		0.84		0.81		32		1.088		1.167
04:58	2.3		81		0.95		0.8		0.85		33		1.09		1.18
05:01	1.7		82		0.68		0.58		0.85		23		1.027		0.776
05:05	1.4		83		0.58		0.51		0.87		19		1.217		1.366
05:08	1		83		0.41		0.35		0.84		13		0.691		0.802
05:11	1.3		85		0.54		0.44		0.81		16		0.786		0.945
05:14	1.2		85		0.51		0.39		0.77		15		0.679		0.747
05:17	1.8		85		0.74		0.58		0.78		20		1.008		1.16
05:19	1.7		85		0.69		0.52		0.76		19		0.706		0.84
05:21	3		86		1.21		0.93		0.77		35		1.157		1.259
05:23	2.7		86		1.11		0.88		0.79		35		1.023		1.041
05:25	2.5		86		1.01		0.82		0.81		33		1.055		1.053
05:27	2		86		0.82		0.69		0.84		26		1.118		1.201
05:30	2.1		88		0.87		0.73		0.84		29		1.058		1.09
05:33	1.4		88		0.58		0.48		0.83		15		0.935		1.119
05:35	2.9		89		1.18		0.97		0.82		35		1.239		1.228
05:37	2.6		89		1.06		0.89		0.83		35		0.973		1.091
05:39	2.5		89		1.03		0.86		0.83		33		0.909		0.861
05:41	2.7		90		1.09		0.93		0.85		37		1.069		1.139
05:42	2.1		90		0.85		0.71		0.83		31		0.714		0.633
05:43	2.4		90		0.98		0.82		0.84		35		0.876		0.942
05:45	1.2		90		0.49		0.4		0.8		17		0.555		0.359
05:47	2.2		90		0.91		0.71		0.79		31		0.615		0.755
05:48	2.8		90		1.15		0.92		0.8		36		0.76		0.762
05:49	2.6		90		1.07		0.86		0.81		35		0.823		0.911
05:51	2.7		90		1.12		0.92		0.82		37		0.885		0.894
05:54	1.7		90		0.71		0.58		0.82		20		0.951		1.164
05:55	3		90		1.22		1		0.82		38		1.167		1.159
05:57	2.8		90		1.13		0.94		0.83		37		1.067		1.087
05:59	2.3		90		0.93		0.77		0.83		31		0.861		0.823
06:00	2		90		0.83		0.69		0.83		29		0.759		0.961
06:02	2.8		90		1.16		0.98		0.85		39		1.038		1.029
06:04	3.2		90		1.29		1.12		0.86		45		1.371		1.408
06:06	2.5		89		1.02		0.88		0.87		37		1.047		1.009
06:07	2.4		89		0.99		0.87		0.88		37		0.957		1.063
06:09	2.3		89		0.95		0.83		0.88		35		0.886		0.806
06:10	2.4		90		0.99		0.87		0.87		35		1.007		0.997
06:12	2.3		90		0.94		0.82		0.87		33		0.922		0.992
06:13	1.3		90		0.55		0.46		0.84		25		0.4		0.509
06:16	2.3		90		0.96		0.82		0.86		28		1.264		1.295
06:20	1		90		0.4		0.31		0.76		9		0.63		0.946
06:23	2.6		90		1.05		0.78		0.74		24		1.079		1.017
06:25	2.2		90		0.9		0.66		0.73		23		0.819		0.996
06:27	3.7		90		1.53		1.14		0.74		40		1.203		1.199
06:30	3.5		89		1.43		1.19		0.83		44		2.539		2.817
06:32	2.6		89		1.06		0.88		0.83		36		0.992		1.006
06:34	2.4		89		1		0.84		0.85		35		1.021		0.988
06:36	2.6		88		1.07		0.94		0.87		37		1.204		1.241
06:38	2.5		88		1.04		0.91		0.88		36		1.123		1.126
06:39	2.4		88		0.96		0.86		0.89		36		0.942		1.069
06:40	2.3		88		0.94		0.84		0.89		35		0.784		0.752
06:42	2.4		88		0.99		0.88		0.89		37		0.851		0.891
06:43	2.5		88		1.02		0.9		0.89		35		0.973		0.925
06:45	2.6		89		1.06		0.94		0.89		37		1.115		1.16
06:47	2.2		89		0.89		0.79		0.88		31		0.85		0.913
06:48	2.2		89		0.9		0.79		0.88		32		0.765		0.853
06:50	2.5		90		1.01		0.89		0.88		34		0.908		0.908
06:52	2.6		90		1.08		0.94		0.87		37		1.022		1.037
06:53	2.4		90		0.97		0.85		0.88		33		0.881		0.881
06:55	2.6		90		1.05		0.93		0.89		36		1.189		1.175
06:57	2.2		90		0.91		0.8		0.88		31		0.98		0.995
06:59	2.1		90		0.88		0.76		0.86		28		0.784		0.823
07:00	2.3		89		0.94		0.82		0.87		32		0.771		0.855
07:02	2.4		89		1		0.87		0.87		33		0.881		0.928
07:03	2.4		89		0.97		0.84		0.86		32		0.86		0.902
07:05	2.2		88		0.88		0.75		0.85		29		0.788		0.848
07:07	2		88		0.82		0.7		0.86		27		0.674		0.782
07:09	2.5		88		1.02		0.88		0.86		32		1.051		1.053
07:10	2.1		87		0.87		0.75		0.86		30		0.763		0.843
07:12	2.3		87		0.96		0.83		0.87		33		0.87		0.913
07:13	2.5		87		1.02		0.88		0.87		33		0.951		0.976
07:15	2.3		86		0.96		0.83		0.86		33		0.84		0.875
07:17	2.6		86		1.06		0.93		0.87		36		1.072		1.01
07:18	2.1		86		0.88		0.77		0.88		30		0.831		0.86
07:20	2		86		0.82		0.7		0.86		28		0.746		0.738
07:21	2		86		0.81		0.7		0.86		29		0.656		0.794
07:23	2.4		86		0.97		0.84		0.87		34		0.819		0.812
07:24	1.2		86		0.48		0.39		0.81		19		0.455		0.482
07:26	2.5		86		1.03		0.87		0.85		34		0.943		1.036
07:28	2.6		86		1.07		0.91		0.85		34		0.954		1.023
07:30	2.8		86		1.13		0.99		0.87		38		1.265		1.255
07:31	2.6		86		1.05		0.92		0.87		36		0.966		1.045
07:33	2.5		86		1		0.88		0.88		35		0.973		0.891
07:36	2.6		88		1.07		0.98		0.91		36		1.622		1.653
07:38	2.4		88		0.97		0.9		0.92		34		1.554		1.527
07:40	2		88		0.83		0.74		0.89		28		0.926		0.973
07:42	2.4		88		0.96		0.85		0.89		32		1.025		1.042
07:44	2.4		88		0.97		0.87		0.9		32		1.22		1.264
07:47	2.3		88		0.95		0.86		0.9		33		1.174		1.24
07:49	2.2		88		0.89		0.8		0.89		29		1.086		1.086
07:51	2.4		88		0.98		0.87		0.89		33		1.127		1.124
07:53	2.5		88		1.04		0.93		0.89		35		1.276		1.28
07:55	2.4		89		0.99		0.87		0.89		33		1.131		1.086
07:58	2.7		89		1.1		1.01		0.92		37		1.988		2.005
08:00	1.5		90		0.6		0.52		0.86		22		0.507		0.658
08:01	2.2		90		0.91		0.79		0.86		29		0.862		0.822
08:03	2.1		90		0.87		0.74		0.85		29		0.806		0.804
08:05	2.8		91		1.13		0.97		0.86		36		1.194		1.2
08:07	2.5		91		1.02		0.88		0.86		32		1.202		1.111
08:09	2		91		0.8		0.67		0.84		28		0.638		0.837
08:10	2.3		92		0.94		0.79		0.84		33		0.637		0.704
08:11	3		92		1.21		1.04		0.85		40		0.941		0.97
08:13	2.7		92		1.12		0.96		0.86		38		0.852		0.913
08:14	2.7		92		1.12		0.97		0.86		38		0.936		0.873
08:16	3.1		92		1.25		1.09		0.88		42		1.194		1.21
08:17	2.2		92		0.92		0.8		0.87		34		0.758		0.819
08:18	1.7		92		0.7		0.62		0.88		28		0.598		0.746
08:20	1.6		92		0.67		0.56		0.84		21		0.625		0.413
08:22	1.5		92		0.61		0.49		0.81		21		0.704		0.798
08:25	2		90		0.81		0.64		0.79		19		0.882		1.048
08:26	3.4		90		1.39		1.08		0.78		39		0.894		0.852
08:28	2.9		90		1.2		0.95		0.79		38		0.833		0.934
08:29	3.2		90		1.3		1.04		0.8		41		0.799		0.773
08:30	3.1		88		1.25		1.03		0.83		41		0.889		0.947
08:31	3		88		1.23		1.03		0.83		41		0.887		0.906
08:33	3.4		88		1.39		1.19		0.85		46		1.404		1.366
08:35	2.8		88		1.13		1		0.89		40		1.202		1.227
08:37	2.5		88		1.02		0.9		0.88		36		0.961		0.908
08:40	1.8		88		0.74		0.65		0.87		22		1.265		1.089
08:41	2		88		0.82		0.68		0.83		27		0.662		0.915
08:43	2.7		88		1.12		0.94		0.84		36		0.926		0.882
08:45	2.8		87		1.15		0.98		0.85		37		0.998		1.042
08:46	3		87		1.22		1.06		0.86		40		1.155		1.218
08:48	2.8		87		1.13		1		0.89		39		1.148		1.226
08:50	2.8		87		1.16		1.04		0.9		41		1.34		1.265
08:52	2.5		87		1.02		0.91		0.9		36		0.991		1.073
08:53	2.5		87		1.01		0.91		0.9		36		0.983		1.011
08:55	2.4		88		0.97		0.87		0.9		35		0.899		0.976
08:56	2.3		88		0.96		0.87		0.91		35		0.791		0.814
08:57	2.3		88		0.92		0.83		0.9		34		0.661		0.676
08:59	2.4		88		1		0.9		0.89		34		0.946		0.916
09:01	2.5		89		1.04		0.94		0.9		37		0.969		1.112
09:02	2.8		89		1.12		1.02		0.9		41		0.982		0.97
09:04	2.6		89		1.07		0.96		0.9		36		0.974		0.993
09:05	2.5		90		1.04		0.93		0.9		36		0.939		1.044
09:07	2.5		90		1.04		0.94		0.9		36		0.906		0.951
09:09	1.3		90		0.55		0.49		0.89		18		0.801		0.979
09:12	2		90		0.82		0.66		0.8		21		0.922		0.87
09:14	3.4		90		1.4		1.15		0.82		40		1.121		1.046
09:15	3.4		90		1.38		1.14		0.82		42		1.018		1.049
09:17	3.1		90		1.27		1.07		0.84		41		1.04		1.075
09:19	2.9		90		1.19		1.01		0.85		39		1.222		1.205
09:21	2.3		90		0.95		0.81		0.85		30		1.065		1.135
09:23	3.1		90		1.25		1.08		0.86		40		1.355		1.351
09:24	2.8		90		1.14		0.99		0.87		39		1.069		1.258
09:26	2.9		90		1.21		1.07		0.88		41		1.123		1.056
09:28	2.9		90		1.2		1.07		0.89		42		1.213		1.279
09:30	2.8		92		1.13		1.02		0.9		40		1.351		1.368
09:32	2.8		92		1.14		1.03		0.9		40		1.149		1.116
09:33	2.4		92		0.97		0.87		0.89		35		0.92		1.017
09:35	3		93		1.21		1.11		0.92		41		1.605		1.607
09:37	2		93		0.84		0.74		0.89		30		0.693		0.829
09:38	2.6		93		1.07		0.96		0.89		36		0.872		0.896
09:40	2.8		95		1.16		1.04		0.9		39		1.125		1.128
09:42	2.9		95		1.19		1.06		0.89		40		1.161		1.181
09:44	2.8		95		1.16		1.03		0.89		38		1.208		1.171
09:46	2.9		96		1.18		1.05		0.9		39		1.26		1.314
09:48	2.8		96		1.15		1.03		0.9		39		1.336		1.417
09:50	2.8		96		1.16		1.04		0.9		39		1.255		1.175
09:52	2.9		96		1.18		1.07		0.91		40		1.457		1.5
09:54	2.7		96		1.08		0.98		0.9		36		1.202		1.315
09:56	2.5		96		1.03		0.92		0.89		35		0.994		1.08
09:57	3		96		1.24		1.1		0.89		40		1.285		1.274
09:59	3		96		1.23		1.1		0.9		42		1.304		1.383
10:01	3		96		1.24		1.13		0.91		42		1.38		1.397
10:03	3		96		1.24		1.14		0.92		44		1.296		1.382
10:04	2.3		96		0.92		0.84		0.91		33		0.745		0.872
10:06	2.8		96		1.15		1.04		0.91		39		1.018		0.978
10:08	2.4		96		1		0.89		0.89		33		0.872		0.93
10:09	2.7		96		1.09		0.97		0.89		37		0.836		0.992
10:10	3		96		1.21		1.09		0.89		41		0.946		0.976
10:12	2.6		96		1.07		0.95		0.89		36		0.89		0.875
10:13	2.9		96		1.2		1.07		0.89		41		1.097		1.157
10:15	2.9		96		1.19		1.07		0.9		42		0.977		1.053
10:16	2.9		96		1.2		1.09		0.91		43		0.992		1.048
10:18	2.9		96		1.19		1.09		0.91		42		1.031		1.061
10:20	3.2		94		1.29		1.21		0.93		45		1.641		1.62
10:21	2.6		94		1.06		0.97		0.92		38		0.977		1.073
10:23	2.7		94		1.09		1		0.92		38		1.053		1.044
10:25	2.7		93		1.09		0.99		0.91		38		1.05		1.145
10:27	2.9		93		1.17		1.08		0.92		40		1.335		1.28
10:29	1.5		93		0.62		0.54		0.88		19		0.807		0.918
10:33	1.9		93		0.77		0.66		0.85		20		1.242		1.204
10:34	3.9		93		1.61		1.3		0.81		44		1.084		1.248
10:36	3.9		93		1.58		1.3		0.82		45		1.259		1.298
10:38	3.5		93		1.45		1.23		0.85		48		1.192		1.292
10:39	3.3		93		1.35		1.18		0.87		46		1.173		1.222
10:41	3.2		93		1.32		1.19		0.9		46		1.279		1.273
10:43	3.1		93		1.25		1.15		0.92		44		1.475		1.45
10:44	2.8		93		1.13		1.05		0.92		42		1.124		1.282
10:46	2.8		93		1.13		1.06		0.94		41		1.176		1.125
10:50	3.1		93		1.25		1.23		0.99		45		2.563		2.651
10:52	2.4		93		0.99		0.94		0.95		36		1.218		1.242
10:53	2.3		93		0.93		0.86		0.92		35		0.76		0.899
10:54	2.5		93		1.03		0.95		0.92		37		0.818		0.848
10:56	2.4		93		0.99		0.9		0.91		36		0.768		0.769
10:57	2.4		93		1		0.89		0.9		33		0.923		0.85
10:59	2.6		93		1.04		0.9		0.86		34		0.779		0.747
11:00	3.1		94		1.28		1.12		0.87		40		1.166		1.259
11:02	3.3		94		1.34		1.18		0.88		44		1.227		1.315
11:03	2.9		94		1.2		1.06		0.89		40		1.026		1.035
11:05	3		95		1.23		1.11		0.9		42		1.111		1.172
11:06	2.8		95		1.13		1		0.89		40		0.928		1.018
11:08	2.7		95		1.1		0.99		0.9		39		0.964		1.02
11:09	2.4		95		1		0.89		0.89		37		0.727		0.79
11:10	2.8		95		1.15		1.04		0.9		41		0.846		0.873
11:12	3.1		95		1.29		1.16		0.9		45		1.014		1.049
11:13	2.7		95		1.12		1.01		0.9		39		0.851		0.926
11:14	3		94		1.21		1.1		0.91		42		0.921		0.935
11:16	3.1		94		1.28		1.16		0.91		43		1.242		1.203
11:18	3.1		94		1.25		1.13		0.9		43		1.135		1.247
11:19	3		94		1.24		1.13		0.91		43		1.045		1.022
11:21	3.1		94		1.27		1.15		0.91		43		1.257		1.26
11:22	2.6		94		1.05		0.95		0.91		39		0.889		1.064
11:23	2.9		94		1.21		1.1		0.91		44		0.945		0.951
11:25	2.9		96		1.19		1.08		0.91		44		0.945		0.997
11:26	2.7		96		1.11		1		0.9		39		0.816		0.742
11:27	2.9		96		1.21		1.09		0.9		42		1.015		1.101
11:29	2.7		96		1.11		1.01		0.91		41		0.789		0.961
11:30	3.3		97		1.37		1.25		0.91		46		1.252		1.108
11:32	3.1		97		1.25		1.13		0.9		42		1.243		1.32
11:34	3		97		1.21		1.08		0.9		41		1.093		1.081
11:35	3.1		97		1.27		1.15		0.91		43		1.207		1.358
11:37	2.8		97		1.13		1.02		0.9		40		0.836		0.872
11:38	3.1		97		1.25		1.14		0.91		44		0.995		1.046
11:40	3.2		98		1.3		1.18		0.91		44		1.229		1.245
11:41	2.9		98		1.19		1.07		0.9		39		1.065		1.144
11:43	2.8		98		1.15		1.04		0.9		40		0.972		1.067
11:44	3.2		98		1.32		1.2		0.91		45		1.218		1.272
11:46	3.2		98		1.3		1.18		0.91		44		1.363		1.338
11:48	3.1		98		1.25		1.14		0.91		43		1.169		1.286
11:49	3		98		1.22		1.12		0.92		43		1.033		1.05
11:51	3.2		98		1.29		1.19		0.92		45		1.161		1.141
11:53	3.2		98		1.31		1.21		0.92		45		1.415		1.509
11:54	3		98		1.23		1.13		0.92		45		1.083		1.194
11:55	2.9		99		1.2		1.11		0.93		43		0.985		1.004
11:57	2.8		99		1.16		1.06		0.92		39		1.015		1.021
11:58	2.8		99		1.16		1.05		0.91		41		0.96		1.092
12:00	2.9		98		1.17		1.06		0.9		41		0.85		0.875
12:01	2.7		98		1.1		0.99		0.9		37		0.902		0.934
12:03	3		98		1.22		1.09		0.89		39		1.046		1.089
12:04	2.7		98		1.1		0.98		0.89		37		0.855		0.951
12:05	3.1		97		1.26		1.12		0.89		41		0.921		0.937
12:07	2.2		97		0.92		0.8		0.88		30		0.649		0.749
12:08	3.3		97		1.36		1.19		0.88		42		1.132		1.13
12:10	3.3		96		1.36		1.18		0.87		43		1.171		1.15
12:12	3.3		96		1.36		1.2		0.89		44		1.246		1.375
12:14	3.3		96		1.37		1.23		0.9		46		1.414		1.393
12:15	3.1		96		1.25		1.14		0.91		42		1.166		1.271
12:17	3.3		96		1.33		1.22		0.91		46		1.376		1.364
12:19	3		96		1.25		1.15		0.92		43		1.29		1.374
12:20	2.9		97		1.17		1.08		0.92		42		1.047		1.152
12:22	3		97		1.22		1.13		0.93		44		0.998		1.036
12:23	3		97		1.24		1.15		0.93		43		1.231		1.218
12:25	3		99		1.21		1.12		0.93		41		1.147		1.164
12:27	3.1		99		1.28		1.18		0.92		44		1.221		1.37
12:28	3		99		1.23		1.14		0.93		44		1.042		1.124
12:29	3.1		100		1.27		1.18		0.93		45		1.038		1.075
12:31	3.2		100		1.3		1.2		0.93		43		1.105		1.07
12:33	3.2		100		1.33		1.22		0.92		44		1.259		1.282
12:34	2.7		101		1.11		1.01		0.91		38		1.076		1.21
12:36	3		101		1.24		1.12		0.91		40		1.084		1.157
12:37	3		101		1.21		1.1		0.9		41		1.011		1.054
12:39	3.2		101		1.33		1.21		0.91		43		1.269		1.328
12:42	3.4		101		1.41		1.31		0.93		46		1.879		1.868
12:43	2.9		101		1.18		1.07		0.91		41		1.08		1.193
12:45	2.8		100		1.14		1.04		0.91		39		1.009		1.028
12:46	2.8		100		1.14		1.02		0.9		37		0.949		1.066
12:48	3.2		100		1.31		1.17		0.89		42		1.207		1.195
12:50	3.2		100		1.32		1.18		0.9		44		1.118		1.244
12:51	3.5		100		1.41		1.28		0.91		47		1.408		1.366
12:53	3.4		100		1.39		1.28		0.92		48		1.336		1.431
12:55	3.2		101		1.32		1.22		0.92		45		1.344		1.461
12:56	3.2		101		1.31		1.22		0.93		47		1.217		1.358
12:58	3.1		101		1.28		1.21		0.94		45		1.156		1.178
12:59	2.5		102		1.02		0.92		0.9		37		0.924		0.997
13:01	3		102		1.24		1.11		0.9		40		1.013		0.924
13:03	3.3		102		1.36		1.21		0.89		44		1.106		1.214
13:05	3		103		1.23		1.11		0.9		37		1.351		1.476
13:06	2.7		103		1.12		0.97		0.87		35		1.002		1.041
13:08	3		103		1.22		1.08		0.89		44		0.992		1.442
13:10	2.9		102		1.19		1.01		0.85		32		1.08		0.722
13:12	2.2		102		0.88		0.71		0.8		24		0.821		0.85
13:13	3.5		102		1.41		1.13		0.8		38		0.993		1.139
13:15	3.5		102		1.45		1.16		0.8		41		0.913		0.978
13:16	4.1		102		1.66		1.36		0.82		48		1.13		1.186
13:18	3.7		102		1.5		1.26		0.84		45		1.054		1.184
13:20	3.1		102		1.28		1.1		0.85		38		1.342		1.51
13:21	3.6		102		1.45		1.23		0.85		44		1.186		1.216
13:23	4.4		102		1.79		1.57		0.88		57		1.551		1.592
13:25	4		104		1.64		1.48		0.9		55		1.478		1.535
13:26	3.7		104		1.51		1.38		0.92		50		1.636		1.658
13:28	3.6		104		1.46		1.36		0.93		51		1.468		1.561
13:30	3.5		106		1.42		1.31		0.93		49		1.328		1.347
13:32	3.8		106		1.56		1.47		0.94		53		1.674		1.73
13:33	3.8		106		1.56		1.47		0.94		53		1.467		1.556
13:36	2.5		108		1.03		0.96		0.93		28		1.21		1.465
13:38	4.3		108		1.76		1.62		0.92		55		1.385		1.393
13:39	4		108		1.65		1.51		0.92		55		1.29		1.329
13:41	3.8		110		1.55		1.45		0.93		51		1.346		1.506
13:42	3.9		110		1.58		1.49		0.94		53		1.639		1.589
13:44	3.6		110		1.46		1.38		0.94		51		1.388		1.522
13:46	3.6		111		1.45		1.38		0.95		51		1.266		1.342
13:47	3.5		111		1.42		1.34		0.94		50		1.279		1.388
13:49	3.7		111		1.49		1.42		0.95		52		1.366		1.357
13:50	3.6		111		1.45		1.38		0.95		49		1.351		1.355
13:52	3.7		111		1.51		1.43		0.95		51		1.319		1.465
13:53	3.6		111		1.48		1.41		0.95		50		1.324		1.358
13:55	3.6		110		1.49		1.42		0.95		51		1.446		1.475
13:57	3.5		110		1.44		1.36		0.94		48		1.428		1.451
13:59	3.7		110		1.5		1.43		0.95		51		1.413		1.508
14:00	3.5		109		1.43		1.36		0.95		49		1.273		1.364
14:02	3.8		109		1.54		1.46		0.95		53		1.475		1.516
14:03	3.6		109		1.45		1.39		0.95		51		1.336		1.368
14:05	3.6		109		1.46		1.39		0.96		51		1.438		1.49
14:07	3.5		109		1.43		1.36		0.95		51		1.281		1.386
14:08	3.5		109		1.44		1.38		0.96		49		1.311		1.359
14:10	3.6		109		1.46		1.4		0.96		50		1.616		1.652
14:12	3.5		109		1.41		1.35		0.95		49		1.32		1.475
14:13	3.3		109		1.33		1.27		0.95		47		1.046		1.147
14:15	3.5		109		1.44		1.37		0.95		49		1.261		1.252
14:16	3.5		109		1.41		1.33		0.94		48		1.155		1.29
14:18	3.5		109		1.43		1.35		0.94		48		1.232		1.244
14:19	3.7		108		1.52		1.43		0.94		52		1.362		1.45
14:21	3.7		108		1.53		1.46		0.95		53		1.49		1.507
14:23	3.6		108		1.47		1.4		0.96		51		1.493		1.578
14:24	3.7		108		1.52		1.46		0.96		54		1.371		1.408
14:26	3.7		108		1.5		1.45		0.97		53		1.608		1.595
14:28	3.5		108		1.43		1.37		0.96		49		1.371		1.406
14:29	3.5		109		1.42		1.37		0.96		50		1.42		1.482
14:31	3.5		109		1.42		1.36		0.96		49		1.361		1.47
14:33	3.4		109		1.37		1.31		0.95		47		1.306		1.365
14:34	3.4		109		1.39		1.32		0.94		47		1.177		1.247
14:36	3.4		109		1.39		1.31		0.94		47		1.273		1.359
14:37	3.7		109		1.53		1.45		0.95		52		1.273		1.358
14:39	3.9		109		1.59		1.53		0.96		55		1.619		1.594
14:41	3.2		109		1.32		1.25		0.95		46		1.188		1.344
14:42	3.5		109		1.44		1.37		0.95		48		1.239		1.299
14:44	3.5		109		1.41		1.33		0.94		46		1.294		1.355
14:45	3.8		109		1.55		1.47		0.94		53		1.37		1.418
14:47	3.6		109		1.49		1.41		0.95		50		1.332		1.421
14:49	3.6		109		1.48		1.4		0.94		51		1.406		1.46
14:50	3.6		109		1.49		1.41		0.95		51		1.449		1.472
14:52	3.5		109		1.45		1.38		0.95		51		1.247		1.418
14:54	3.8		109		1.57		1.49		0.95		54		1.692		1.607
14:55	3.6		109		1.48		1.42		0.95		52		1.477		1.585
14:57	3.5		109		1.45		1.38		0.95		50		1.27		1.401
14:59	3.4		109		1.4		1.33		0.95		47		1.422		1.455
15:00	3.6		110		1.47		1.4		0.95		52		1.278		1.413
15:02	3.7		110		1.52		1.45		0.96		53		1.318		1.35
15:04	3.7		110		1.51		1.44		0.95		52		1.5		1.528
15:05	3.6		111		1.47		1.41		0.96		51		1.371		1.496
15:07	3.8		111		1.55		1.48		0.96		53		1.408		1.449
15:09	3.9		111		1.59		1.55		0.98		56		2.045		2.043
15:11	3.5		112		1.42		1.38		0.97		48		1.626		1.667
15:13	3.5		112		1.42		1.34		0.94		47		1.327		1.474
15:14	3.2		112		1.32		1.26		0.95		48		1.05		1.418
15:15	3.8		112		1.57		1.52		0.96		54		1.325		1.27
15:17	3.9		112		1.61		1.55		0.97		58		1.285		1.429
15:18	3.8		112		1.55		1.5		0.97		55		1.342		1.293
15:20	3.6		112		1.46		1.41		0.97		50		1.336		1.401
15:21	4.1		112		1.66		1.6		0.96		59		1.493		1.612
15:23	3.8		112		1.54		1.5		0.98		57		1.231		1.349
15:24	3.9		112		1.6		1.59		0.99		58		1.516		1.543
15:26	3.8		112		1.55		1.53		0.99		56		1.578		1.713
15:28	3.7		112		1.5		1.48		0.98		55		1.598		1.598
15:29	3.6		113		1.48		1.46		0.98		54		1.448		1.559
15:31	3.6		113		1.47		1.43		0.98		52		1.423		1.436
15:33	3.6		113		1.47		1.44		0.98		52		1.494		1.612
15:34	3.7		114		1.51		1.48		0.98		54		1.406		1.388
15:36	3.7		114		1.52		1.48		0.98		53		1.575		1.66
15:38	3.4		114		1.39		1.34		0.97		47		1.42		1.545
15:39	3.6		114		1.47		1.41		0.96		50		1.43		1.473
15:41	3.5		114		1.42		1.37		0.96		48		1.57		1.641
15:43	3.6		114		1.48		1.4		0.95		50		1.445		1.528
15:45	3.6		114		1.48		1.4		0.94		49		1.418		1.515
15:46	3.5		114		1.45		1.38		0.95		51		1.225		1.359
15:48	3.6		114		1.47		1.4		0.95		53		1.086		1.151
15:49	3.9		114		1.6		1.54		0.96		57		1.293		1.349
15:50	3.7		113		1.53		1.46		0.96		54		1.194		1.251
15:52	3.8		113		1.57		1.51		0.96		55		1.302		1.365
15:53	3.9		113		1.58		1.53		0.97		56		1.409		1.459
15:55	3.6		112		1.46		1.41		0.97		52		1.246		1.341
15:56	3.8		112		1.56		1.53		0.98		57		1.477		1.509
15:58	3.6		112		1.45		1.41		0.97		52		1.351		1.432
15:59	3.5		111		1.44		1.39		0.97		52		1.231		1.346
16:00	3.6		111		1.45		1.41		0.97		54		1.167		1.245
16:02	3.6		111		1.49		1.45		0.97		53		1.225		1.254
16:03	3.8		111		1.54		1.5		0.97		54		1.311		1.411
16:05	3.9		111		1.6		1.57		0.98		58		1.473		1.502
16:07	3.8		111		1.54		1.51		0.98		54		1.559		1.623
16:08	3.3		111		1.36		1.32		0.97		49		1.216		1.237
16:10	3.6		112		1.48		1.42		0.97		51		1.417		1.546
16:11	3.4		112		1.4		1.34		0.96		49		1.119		1.239
16:13	3.7		112		1.52		1.46		0.96		52		1.309		1.36
16:14	3.7		112		1.5		1.43		0.95		50		1.421		1.486
16:16	3.7		112		1.5		1.42		0.95		51		1.158		1.268
16:17	3.8		112		1.54		1.48		0.96		54		1.378		1.435
16:19	3.9		112		1.61		1.55		0.96		56		1.445		1.491
16:20	3.9		112		1.59		1.54		0.96		57		1.477		1.539
16:22	3.7		112		1.52		1.47		0.97		54		1.396		1.456
16:23	3.4		112		1.38		1.32		0.95		48		1.238		1.31
16:25	3.7		111		1.5		1.44		0.96		53		1.272		1.357
16:26	3.8		111		1.55		1.47		0.95		53		1.314		1.36
16:28	3.8		111		1.56		1.48		0.95		54		1.291		1.348
16:29	3.9		112		1.59		1.51		0.95		53		1.422		1.513
16:31	3.7		112		1.53		1.46		0.95		52		1.362		1.444
16:32	3.7		112		1.49		1.41		0.95		53		1.161		1.305
16:34	3.8		112		1.57		1.51		0.96		55		1.311		1.404
16:35	4		112		1.65		1.58		0.96		57		1.419		1.381
16:37	3.9		112		1.59		1.52		0.96		56		1.478		1.564
16:38	3.9		112		1.61		1.57		0.97		58		1.378		1.526
16:40	4.1		113		1.67		1.63		0.98		59		1.573		1.561
16:41	3.8		113		1.57		1.54		0.98		57		1.38		1.474
16:43	4		113		1.63		1.6		0.98		59		1.531		1.629
16:44	3.8		114		1.55		1.51		0.97		55		1.284		1.297
16:45	3.6		114		1.46		1.43		0.98		55		1.119		1.311
16:48	3.3		114		1.35		1.3		0.96		44		1.567		1.278
16:49	3.7		115		1.51		1.39		0.92		48		1.405		1.506
16:50	3.7		115		1.51		1.37		0.91		53		1.087		1.281
16:52	3.5		115		1.42		1.31		0.92		40		1.311		1.421
16:55	2.7		115		1.09		0.96		0.89		26		1.147		1.44
16:56	5.1		115		2.1		1.85		0.88		61		1.42		1.474
16:58	4.9		115		1.99		1.8		0.9		62		1.525		1.516
16:59	4.4		115		1.81		1.66		0.92		61		1.485		1.663
17:01	4.2		115		1.73		1.62		0.94		59		1.47		1.55
17:03	3.9		115		1.59		1.51		0.95		55		1.48		1.519
17:04	4.1		116		1.7		1.62		0.96		58		1.617		1.703
17:06	4.2		116		1.7		1.64		0.97		59		1.487		1.491
17:07	4		116		1.64		1.58		0.97		58		1.509		1.552
17:09	4.2		116		1.72		1.68		0.98		62		1.593		1.736
17:10	4.4		117		1.8		1.79		1		67		1.6		1.673
17:12	4		117		1.65		1.67		1.01		62		1.538		1.598
17:13	4		117		1.63		1.65		1.01		62		1.474		1.569
17:15	4.1		117		1.66		1.69		1.01		62		1.601		1.671
17:17	3.5		117		1.43		1.43		1		49		1.478		1.509
17:18	4.2		117		1.71		1.71		1		62		1.465		1.558
17:19	4.2		118		1.73		1.74		1		64		1.659		1.789
17:21	4.4		118		1.79		1.82		1.01		67		1.661		1.736
17:22	4.1		118		1.69		1.72		1.02		65		1.385		1.463
17:24	4.1		118		1.68		1.73		1.03		66		1.454		1.491
17:25	4.1		120		1.67		1.72		1.03		64		1.503		1.494
17:27	4.1		120		1.68		1.72		1.03		64		1.705		1.736
17:28	4.1		120		1.68		1.71		1.02		63		1.755		1.823
17:30	4.1		120		1.66		1.7		1.02		63		1.631		1.728
17:31	4.1		120		1.67		1.71		1.02		62		1.39		1.53
17:33	4.2		120		1.72		1.78		1.03		66		1.611		1.709
17:34	4.2		120		1.7		1.76		1.03		67		1.448		1.601
17:35	4.1		121		1.69		1.75		1.04		65		1.411		1.455
17:37	4.3		121		1.77		1.83		1.04		68		1.618		1.643
17:38	4		121		1.64		1.7		1.04		62		1.437		1.542
17:39	4.2		122		1.71		1.8		1.05		66		1.529		1.629
17:41	4.3		122		1.77		1.85		1.04		67		1.654		1.596
17:42	4		122		1.63		1.68		1.03		62		1.605		1.657
17:44	4.1		122		1.67		1.72		1.03		61		1.607		1.679
17:46	4.2		122		1.74		1.77		1.02		63		1.759		1.827
17:47	4.3		122		1.77		1.82		1.03		64		1.801		1.805
17:49	4.4		122		1.8		1.83		1.02		65		1.798		1.901
17:51	4		122		1.65		1.67		1.01		60		1.611		1.697
17:52	4		122		1.65		1.67		1.02		60		1.596		1.635
17:54	4.1		122		1.67		1.7		1.02		60		1.529		1.68
17:55	4.4		122		1.82		1.85		1.02		66		1.66		1.684
17:57	4.2		122		1.7		1.72		1.01		61		1.515		1.633
17:58	4.3		122		1.76		1.8		1.02		63		1.677		1.729
18:00	4.2		122		1.73		1.76		1.02		64		1.721		1.866
18:01	4.2		122		1.72		1.77		1.03		65		1.489		1.573
18:03	4.1		122		1.67		1.74		1.04		64		1.47		1.596
18:04	4.6		122		1.88		1.94		1.03		70		1.691		1.651
18:06	4.2		122		1.71		1.79		1.05		66		1.586		1.759
18:07	4.2		122		1.73		1.81		1.04		66		1.639		1.636
18:09	4		122		1.64		1.7		1.04		61		1.484		1.595
18:10	4.1		122		1.69		1.75		1.04		60		1.724		1.767
18:12	3.9		122		1.61		1.64		1.02		57		1.403		1.504
18:13	4.1		122		1.69		1.72		1.01		60		1.596		1.732
18:15	4.5		122		1.86		1.9		1.02		68		1.792		1.916
18:17	4.4		122		1.79		1.84		1.03		66		1.957		1.959
18:18	4		122		1.65		1.7		1.03		62		1.781		1.91
18:20	4.1		121		1.69		1.74		1.03		62		1.704		1.806
18:22	4.2		121		1.7		1.76		1.03		62		1.722		1.81
18:23	4.2		121		1.73		1.77		1.02		64		1.694		1.845
18:25	4.2		121		1.72		1.78		1.04		65		1.652		1.684
18:26	3.9		121		1.58		1.62		1.02		58		1.443		1.582
18:28	4.1		121		1.69		1.73		1.03		61		1.692		1.787
18:30	4.3		121		1.77		1.81		1.03		65		1.68		1.764
18:31	4.4		121		1.81		1.87		1.03		67		1.832		1.906
18:33	3.9		121		1.6		1.64		1.03		57		1.684		1.786
18:35	4.1		122		1.68		1.73		1.02		62		1.561		1.639
18:36	4.3		122		1.75		1.8		1.03		64		1.581		1.71
18:37	3.9		122		1.59		1.63		1.02		57		1.366		1.441
18:39	3.5		122		1.41		1.42		1		49		1.199		1.359
18:40	3.9		122		1.59		1.58		0.99		54		1.326		1.42
18:42	4.2		122		1.71		1.69		0.99		57		1.691		1.669
18:43	4.6		122		1.88		1.82		0.97		71		1.411		1.576
18:45	4.5		123		1.85		1.88		1.02		70		1.694		1.831
18:46	4.7		123		1.9		1.95		1.02		73		1.747		1.836
18:48	4.5		123		1.86		1.92		1.03		71		1.969		1.9
18:50	4		121		1.62		1.66		1.03		61		1.709		1.872
18:51	4.2		121		1.73		1.78		1.03		66		1.762		1.79
18:53	4		121		1.64		1.68		1.02		63		1.636		1.752
18:54	4.1		122		1.67		1.71		1.03		63		1.672		1.678
18:56	4		122		1.63		1.66		1.02		60		1.71		1.79
18:58	4.3		122		1.74		1.76		1.02		62		1.755		1.808
18:59	4.3		122		1.76		1.78		1.01		64		1.68		1.807
19:01	4.2		122		1.71		1.74		1.02		64		1.563		1.718
19:03	3.8		122		1.56		1.58		1.01		53		1.636		1.812
19:04	4.5		122		1.86		1.9		1.02		69		1.672		1.779
19:06	4.1		123		1.68		1.71		1.02		61		1.493		1.604
19:07	3.7		123		1.52		1.52		1		48		1.584		1.722
19:09	4.1		123		1.69		1.68		1		60		1.43		1.511
19:11	3.8		122		1.57		1.55		0.99		53		1.526		1.542
19:12	4.1		122		1.68		1.65		0.98		60		1.379		1.649
19:14	4.9		122		2		2.01		1		73		1.865		1.886
19:15	4.1		122		1.68		1.69		1.01		64		1.349		1.449
19:16	3.8		122		1.54		1.52		0.99		55		1.302		1.347
19:18	3.9		122		1.58		1.56		0.99		56		1.474		1.52
19:19	4.2		123		1.73		1.7		0.98		62		1.466		1.594
19:21	4.4		123		1.8		1.8		1		66		1.431		1.535
19:22	3.5		123		1.44		1.4		0.97		55		0.875		0.914
19:23	4.4		123		1.8		1.8		1		67		1.311		1.473
19:24	4.4		123		1.82		1.81		1		66		1.425		1.515
19:25	4.6		123		1.89		1.91		1.01		71		1.699		1.744
19:27	4.5		123		1.84		1.86		1.01		69		1.698		1.796
19:28	4.5		123		1.85		1.9		1.02		73		1.801		1.875
19:30	4.3		125		1.75		1.79		1.03		69		1.69		1.784
19:31	4.4		125		1.8		1.87		1.04		69		1.712		1.771
19:33	4.2		125		1.72		1.78		1.04		68		1.738		1.842
19:34	4.3		125		1.76		1.84		1.04		70		1.708		1.804
19:36	4.2		125		1.72		1.8		1.05		68		1.564		1.692
19:37	4.2		125		1.71		1.77		1.04		66		1.583		1.623
19:39	4.4		125		1.8		1.87		1.04		68		1.688		1.75
19:40	4.4		125		1.8		1.84		1.02		67		1.787		1.845
19:42	4.2		125		1.72		1.76		1.02		66		1.536		1.756
19:43	4.4		125		1.78		1.83		1.03		67		1.644		1.726
19:44	4.7		126		1.9		1.96		1.03		74		1.737		1.849
19:46	4.6		126		1.87		1.94		1.03		71		1.814		1.807
19:48	4.3		126		1.77		1.83		1.03		67		1.692		1.862
19:49	4.3		126		1.78		1.84		1.04		69		1.653		1.743
19:50	4.3		127		1.75		1.81		1.03		67		1.624		1.68
19:52	4.3		127		1.76		1.83		1.04		69		1.601		1.819
19:53	4.5		127		1.84		1.91		1.04		70		1.763		1.726
19:55	4.3		127		1.75		1.82		1.04		68		1.598		1.749
19:56	4.6		127		1.86		1.92		1.03		70		1.741		1.755
19:58	4.5		127		1.82		1.88		1.03		69		1.906		1.882
20:00	4.1		127		1.69		1.73		1.02		63		1.788		1.937
20:01	4.4		127		1.8		1.84		1.02		66		1.75		1.889
20:03	4.5		127		1.82		1.87		1.02		67		1.86		1.885
20:04	4.2		129		1.72		1.75		1.01		64		1.679		1.838
20:06	4.4		129		1.8		1.83		1.02		67		1.609		1.683
20:07	4.5		129		1.85		1.89		1.02		69		1.576		1.742
20:09	4.5		129		1.86		1.9		1.02		67		1.822		1.813
20:10	4.4		129		1.79		1.82		1.02		66		1.619		1.813
20:12	3.7		129		1.5		1.51		1.01		52		1.757		1.802
20:14	4.7		129		1.93		1.92		0.99		66		1.638		1.892
20:14	Recovery
20:15	4.8		127		1.97		1.98		1		70		1.662		1.717
20:16	4.4		127		1.8		1.83		1.02		69		1.38		1.615
20:18	4.4		127		1.81		1.86		1.03		68		1.5		1.544
20:19	4.4		127		1.79		1.82		1.02		66		1.477		1.503
20:21	4.5		127		1.84		1.89		1.02		69		1.707		1.776
20:22	4.4		127		1.79		1.85		1.03		69		1.636		1.767
20:24	4.4		127		1.8		1.87		1.03		70		1.694		1.764
20:25	4.3		126		1.78		1.83		1.03		68		1.587		1.613
20:26	4.2		126		1.71		1.75		1.02		63		1.638		1.702
20:28	4.2		126		1.72		1.77		1.03		65		1.738		1.819
20:29	4.2		126		1.72		1.76		1.02		65		1.478		1.597
20:31	4.2		126		1.74		1.78		1.03		67		1.41		1.536
20:32	4.3		126		1.76		1.81		1.03		67		1.447		1.533
20:33	4.2		126		1.71		1.75		1.02		64		1.459		1.5
20:35	4.4		126		1.79		1.83		1.03		67		1.617		1.67
20:36	4.4		126		1.81		1.87		1.03		70		1.675		1.722
20:38	4.1		126		1.68		1.73		1.03		64		1.72		1.842
20:40	4.2		125		1.7		1.76		1.03		65		1.759		1.841
20:41	4		125		1.66		1.7		1.03		65		1.568		1.68
20:43	4.1		125		1.68		1.73		1.03		62		1.602		1.634
20:44	4.2		123		1.73		1.78		1.03		65		1.89		1.954
20:46	4		123		1.65		1.68		1.02		62		1.674		1.8
20:47	4.2		123		1.71		1.76		1.03		65		1.666		1.783
20:49	4		123		1.63		1.69		1.03		63		1.449		1.531
20:50	4		123		1.62		1.7		1.05		66		1.473		1.554
20:51	3.9		123		1.61		1.7		1.06		67		1.458		1.508
20:53	3.9		123		1.58		1.69		1.07		65		1.489		1.579
20:54	3.4		123		1.37		1.44		1.05		53		1.339		1.443
21:10			120
21:26			115
21:42			113
21:57			112
22:13			108
22:29			105
22:44			108
23:00			102
23:16			98
23:32			100
23:47			97
24:03			98
24:19			99
	3.28693	0.683077	104.628	191.009	1.34469	0.113922	1.272	0.151687	0.932411	0.0047571	47.107	185.147	1.26411	0.104852	1.32432	0.113639
	METS						HR						VO2						VCO2						RER						VE						Vtex						Vtin						LABEL
	Rest		Test		Recovery		Rest		Test		Recovery		Rest		Test		Recovery		Rest		Test		Recovery		Rest		Test		Recovery		Rest		Test		Recovery		Rest		Test		Recovery		Rest		Test		Recovery
	MEDIA	VAR	MEDIA	VAR	MEDIA	VAR	MEDIA	VAR	MEDIA	VAR	MEDIA	VAR	MEDIA	VAR	MEDIA	VAR	MEDIA	VAR	MEDIA	VAR	MEDIA	VAR	MEDIA	VAR	MEDIA	VAR	MEDIA	VAR	MEDIA	VAR	MEDIA	VAR	MEDIA	VAR	MEDIA	VAR	MEDIA	VAR	MEDIA	VAR	MEDIA	VAR	MEDIA	VAR	MEDIA	VAR	MEDIA	VAR	BIN
	1.08667	0.0412381	3.24118	0.669998	4.20357	0.0648016	80.1333	4.98095	103.57	181.17	119.098	103.24	0.450667	0.00686381	1.32595	0.111668	1.72	0.0115185	0.419333	0.00662095	1.24706	0.145701	1.77179	0.00951151	0.929333	0.000506667	0.927522	0.0044826	1.03036	0.000181349	18	14.1429	46.18	175.73	65.6786	11.7817	0.846667	0.0520212	1.24843	0.104054	1.57829	0.0178064	0.883533	0.0606667	1.30748	0.112514	1.66168	0.0172611	1
	1.08667	0.0412381	3.24118	0.669998	4.20357	0.0648016	80.1333	4.98095	103.57	181.17	119.098	103.24	0.450667	0.00686381	1.32595	0.111668	1.72	0.0115185	0.419333	0.00662095	1.24706	0.145701	1.77179	0.00951151	0.929333	0.000506667	0.927522	0.0044826	1.03036	0.000181349	18	14.1429	46.18	175.73	65.6786	11.7817	0.846667	0.0520212	1.24843	0.104054	1.57829	0.0178064	0.883533	0.0606667	1.30748	0.112514	1.66168	0.0172611	1
[truncated: 1 more columns]

## Sheet: POST_Subject24_BxB
Time	METS	HR	V'O2	V'O2/kg	V'CO2	RER	V'E	VE/VO2	VE/VCO2	RR	VTex	VTin	Speed	Elev
min		1/min	L/min	(mL/min)/kg	L/min		L/min			1/min	L	L	mph	%
00:00	Rest
00:02	0.2	0	0.07	0.6	0.06	0.85	3	«-5.1	«-6.0	25.9	0.106	0	0	0
00:04	0.4	75	0.17	1.5	0.14	0.8	5	5.4	6.7	34.3	0.147	0.143	0	0
00:06	1.3	77	0.52	4.5	0.41	0.79	18	27.5	34.8	30.6	0.588	0.544	0	0
00:09	1.3	77	0.52	4.4	0.42	0.81	18	30.1	37	19.9	0.899	0.978	0	0
00:12	1.3	77	0.51	4.4	0.43	0.84	18	31.3	37.1	17.4	1.041	0.993	0	0
00:16	1	78	0.42	3.6	0.36	0.86	17	33.8	39.2	19.9	0.831	0.932	0	0
00:19	1	80	0.39	3.4	0.36	0.9	16	36.3	40.2	15.6	1.039	1.058	0	0
00:22	0.4	80	0.18	1.6	0.15	0.82	9	34.3	41.7	26.3	0.358	0.35	0	0
00:25	0.9	80	0.36	3.1	0.3	0.85	13	30.3	35.7	18.8	0.696	0.543	0	0
00:28	0.4	80	0.15	1.3	0.11	0.77	7	33.2	42.9	16.7	0.412	0.456	0	0
00:31	0.3	80	0.11	0.9	0.08	0.72	5	14.8	20.6	27.5	0.179	0.256	0	0
00:31	Test
00:33	1.5	80	0.6	5.1	0.45	0.76	19	26.1	34.5	25.1	0.741	0.745	0	0
00:36	1.8	79	0.75	6.4	0.6	0.8	26	30.7	38.3	23.3	1.104	1.257	0	0
00:38	2	79	0.82	7	0.68	0.83	30	32	38.5	30	0.99	0.962	0	0
00:39	1.6	79	0.67	5.7	0.57	0.85	26	34	40.1	31.3	0.846	0.829	1	0
00:41	1.6	79	0.66	5.6	0.57	0.86	28	35.2	40.8	38	0.73	0.708	1	0
00:44	0.8	79	0.33	2.8	0.28	0.85	11	24.7	29.1	20.5	0.521	0.571	1	0
00:46	1.1	81	0.44	3.8	0.35	0.79	17	29.2	37	35.3	0.485	0.471	1	0
00:47	1.6	81	0.66	5.6	0.53	0.8	23	28.8	35.9	33.5	0.686	0.643	1	0
00:49	0.9	81	0.37	3.1	0.29	0.78	15	28	36	43.2	0.358	0.349	1	0
00:50	1.5	82	0.63	5.4	0.5	0.8	24	30	37.7	41.1	0.577	0.642	1.2	0
00:52	1.3	82	0.52	4.5	0.41	0.78	21	28.1	36.1	49.2	0.42	0.396	1.2	0
00:53	1.6	82	0.67	5.7	0.53	0.79	26	30.3	38.4	43.2	0.591	0.671	1.2	0
00:54	2	82	0.82	7	0.66	0.8	30	30.2	37.7	39.5	0.748	0.734	1.4	0
00:56	1.6	82	0.63	5.4	0.51	0.81	25	31.5	38.9	45.8	0.557	0.617	1.4	0
00:57	1.7	82	0.68	5.8	0.56	0.82	27	31.8	38.5	45.1	0.597	0.642	1.4	0
00:59	1.6	82	0.67	5.7	0.56	0.84	28	35	41.8	40	0.703	0.798	1.4	0
01:01	1.5	82	0.63	5.4	0.52	0.83	23	31.5	38.1	26.2	0.875	0.767	1.4	0
01:03	2	82	0.82	7	0.7	0.85	31	33.1	38.8	32.3	0.961	1.061	1.4	0
01:05	1.4	83	0.58	5	0.5	0.85	21	31.8	37.2	25.3	0.849	0.828	1.5	0
01:07	1.8	83	0.72	6.1	0.61	0.85	28	32.9	38.6	37.3	0.752	0.78	1.5	0
01:08	1.7	83	0.68	5.8	0.58	0.85	29	34	39.9	46.5	0.616	0.625	1.5	0
01:09	1.7	84	0.72	6.1	0.61	0.86	29	33.6	39.2	42.9	0.681	0.668	1.5	0
01:11	1.9	84	0.78	6.7	0.68	0.88	33	35.9	41	43.5	0.763	0.846	1.5	0
01:12	1.7	84	0.69	5.9	0.6	0.88	30	35.7	40.7	42.6	0.698	0.689	1.5	0
01:13	1.3	84	0.54	4.6	0.45	0.84	23	32.8	39.1	48.8	0.481	0.482	1.5	0
01:17	2.5	85	1.01	8.6	0.87	0.87	35	32.8	37.9	15	2.322	2.443	1.5	0
01:19	0.8	85	0.31	2.7	0.26	0.83	17	36.7	44	42	0.394	0.502	1.5	0
01:21	1.5	86	0.59	5.1	0.48	0.81	20	28	34.5	27	0.737	0.59	1.5	0
01:23	1.5	86	0.61	5.3	0.48	0.79	21	26.8	33.9	35.5	0.583	0.591	1.5	0
01:24	1.4	87	0.59	5	0.46	0.78	22	28.7	36.7	40.5	0.535	0.699	1.5	0
01:27	2.3	87	0.96	8.2	0.75	0.78	28	26.7	34.2	22.6	1.248	1.165	1.5	0
01:28	1.5	87	0.6	5.2	0.45	0.75	23	28.6	38	45.8	0.497	0.588	1.5	0
01:30	1.9	88	0.78	6.7	0.6	0.77	26	27.7	35.9	34.5	0.747	0.713	1.5	0
01:32	2.4	88	0.99	8.4	0.76	0.78	31	27.8	35.8	31.9	0.979	1.017	1.5	0
01:33	2.5	88	1.01	8.7	0.79	0.78	34	28.9	37	38.7	0.876	0.861	1.5	0
01:35	2.3	88	0.93	7.9	0.74	0.79	33	30.3	38.1	38	0.859	0.939	1.5	0
01:37	2.1	88	0.87	7.4	0.68	0.79	28	28.1	35.7	26.9	1.027	0.949	1.5	0
01:39	2.1	88	0.86	7.4	0.69	0.8	30	30.2	37.8	34.7	0.869	0.971	1.5	0
01:41	2.2	88	0.89	7.6	0.72	0.8	30	28.7	35.8	32.8	0.9	0.82	1.5	0
01:42	2.1	88	0.85	7.3	0.67	0.79	30	29.6	37.6	39.2	0.761	0.821	1.5	0
01:44	1.8	88	0.74	6.3	0.58	0.79	25	27.2	34.7	38.7	0.641	0.677	1.5	0
01:46	1.9	88	0.78	6.7	0.63	0.81	26	29.5	36.7	27.8	0.949	1.013	1.6	0
01:47	2	88	0.84	7.2	0.65	0.78	28	27.3	35	44.1	0.638	0.657	1.6	0
01:49	2.7	88	1.09	9.3	0.87	0.8	35	27.9	34.9	37.5	0.93	0.877	1.6	0
01:51	2.4	87	0.97	8.3	0.77	0.79	33	29.1	36.7	37.7	0.867	0.946	1.6	0
01:52	2.4	87	0.96	8.3	0.77	0.8	31	27.8	34.6	30.6	0.997	1.06	1.6	0
01:54	2.4	87	0.99	8.5	0.8	0.81	33	29.7	36.6	33	1.01	1.025	1.6	0
01:56	2.2	87	0.89	7.6	0.73	0.81	32	30.6	37.6	42.6	0.762	0.876	1.6	0
01:58	2.7	87	1.12	9.6	0.94	0.84	38	30.1	36	32.6	1.155	1.126	1.6	0
01:59	2.2	87	0.91	7.8	0.76	0.83	32	30.9	37.2	34.1	0.946	0.989	1.6	0
02:01	2.4	87	0.99	8.5	0.83	0.84	36	31.7	37.7	39	0.925	0.988	1.6	0
02:02	2	87	0.82	7.1	0.69	0.83	32	32.1	38.5	43.8	0.725	0.818	1.6	0
02:04	2.2	87	0.88	7.6	0.75	0.85	31	31.2	36.6	32.1	0.979	0.979	1.6	0
02:06	2.2	88	0.91	7.8	0.77	0.84	30	29.6	35.2	29.6	1.031	1.11	1.6	0
02:08	2.2	88	0.91	7.8	0.76	0.84	30	28.8	34.3	32.4	0.927	0.971	1.6	0
02:10	2.3	88	0.94	8	0.78	0.83	32	29.6	35.8	36.8	0.875	0.834	1.6	0
02:11	2.3	88	0.93	8	0.79	0.84	32	30.2	35.9	33.7	0.957	0.996	1.6	0
02:13	2.1	88	0.85	7.3	0.7	0.83	30	29.9	36.2	37.3	0.804	0.862	1.6	0
02:15	2.7	88	1.12	9.6	0.94	0.84	37	30	35.6	31.1	1.198	1.205	1.6	0
02:17	2.4	88	0.99	8.4	0.84	0.85	35	31.4	37	33.3	1.049	1.159	1.6	0
02:18	2.4	88	1	8.5	0.85	0.85	35	30.9	36.5	34.5	1.013	0.934	1.6	0
02:20	2	87	0.81	6.9	0.67	0.83	29	30.7	36.9	36.1	0.807	0.903	1.6	0
02:22	2.2	87	0.9	7.7	0.75	0.84	31	29.5	35.3	38.7	0.807	0.815	1.6	0
02:23	2.4	87	0.97	8.3	0.81	0.84	34	29.9	35.7	38.5	0.872	0.925	1.6	0
02:25	2.1	88	0.85	7.3	0.71	0.83	30	29.3	35.4	38	0.777	0.821	1.6	0
02:27	2.6	88	1.08	9.2	0.91	0.84	36	29.6	35.2	31.6	1.13	1.14	1.6	0
02:29	2.1	88	0.88	7.5	0.74	0.84	31	30.7	36.7	32.8	0.943	1.039	1.6	0
02:31	2.6	88	1.07	9.1	0.9	0.85	35	29.9	35.3	28.7	1.231	1.192	1.6	0
02:32	2.2	88	0.91	7.8	0.76	0.84	32	30.7	36.5	37.3	0.87	0.969	1.6	0
02:34	2.5	88	1	8.6	0.86	0.86	35	30.6	35.7	31.7	1.088	1.081	1.6	0
02:36	2.1	88	0.84	7.2	0.71	0.84	31	31	37.1	37.3	0.823	0.887	1.6	0
02:37	2.5	88	1	8.6	0.85	0.85	35	30	35.4	39.5	0.884	0.88	1.6	0
02:39	2	88	0.81	7	0.68	0.83	31	31.3	37.5	43.8	0.701	0.769	1.6	0
02:40	1.9	88	0.77	6.6	0.64	0.83	28	28.8	34.7	44.8	0.614	0.703	1.6	0
02:42	2.5	88	1.01	8.7	0.85	0.84	33	28.5	33.8	34.9	0.948	0.993	1.6	0
02:43	2.3	88	0.94	8.1	0.79	0.84	31	28.7	34.2	35.1	0.89	0.958	1.6	0
02:45	2.3	88	0.94	8	0.78	0.83	33	30.4	36.4	39.5	0.841	0.907	1.6	0
02:46	2.2	88	0.9	7.7	0.75	0.83	30	28.6	34.6	38.5	0.79	0.762	1.6	0
02:48	2.5	88	1.03	8.8	0.86	0.84	34	29	34.7	32.4	1.04	1.067	1.6	0
02:50	2.5	87	1.02	8.7	0.84	0.82	34	28.9	35.2	37.7	0.902	0.897	1.6	0
02:51	2.4	87	0.97	8.3	0.81	0.83	35	30.5	36.8	43.5	0.804	0.887	1.6	0
02:53	2.3	87	0.95	8.2	0.8	0.84	32	29	34.6	35.5	0.899	0.903	1.6	0
02:54	2.8	87	1.15	9.8	0.97	0.84	40	30.6	36.3	40.5	0.988	1.068	1.6	0
02:56	2.3	87	0.94	8	0.8	0.85	35	31.6	37	42.3	0.823	0.899	1.6	0
02:58	2.4	87	0.98	8.4	0.85	0.87	35	32	36.8	33.3	1.061	1.074	1.6	0
02:59	2.3	87	0.95	8.1	0.82	0.86	35	31.6	36.7	41.7	0.838	0.963	1.6	0
03:01	2.8	86	1.13	9.7	0.99	0.87	40	31.3	35.9	36.6	1.09	1.035	1.6	0
03:02	2.1	86	0.86	7.3	0.75	0.87	32	31.9	36.6	42	0.771	0.9	1.6	0
03:04	2.4	86	0.99	8.5	0.88	0.88	36	32.1	36.3	30.8	1.154	1.149	1.6	0
03:09	1.9	86	0.78	6.7	0.7	0.89	27	32.2	36	13.5	1.99	2.13	1.6	0
03:11	2.4	88	0.97	8.3	0.79	0.82	27	25.4	31.1	22	1.242	1.16	1.6	0
03:13	2.6	88	1.06	9.1	0.85	0.8	34	27.2	34	38.5	0.874	0.845	1.6	0
03:15	2.6	90	1.08	9.2	0.88	0.82	34	28.2	34.4	30.5	1.118	1.097	1.6	0
03:17	2.6	90	1.06	9	0.86	0.82	34	28.4	34.8	35.9	0.955	1.038	1.6	0
03:18	2.6	90	1.05	9	0.87	0.83	35	28.9	34.9	35.7	0.967	0.985	1.6	0
03:20	2.5	90	1.02	8.7	0.85	0.84	34	29.3	35	36.4	0.938	1.057	1.6	0
03:22	2.5	90	1.04	8.9	0.87	0.84	34	29.1	34.6	32.6	1.046	1.02	1.6	0
03:23	2.5	90	1.02	8.8	0.87	0.85	35	30	35.3	37	0.948	0.982	1.6	0
03:27	2.4	88	0.96	8.2	0.85	0.88	32	31	35.1	16.1	1.967	1.837	1.6	0
03:31	2.3	86	0.95	8.1	0.85	0.9	31	31.4	34.9	14.1	2.224	2.355	1.6	0
03:33	2	86	0.84	7.2	0.7	0.84	27	27.4	32.8	34.1	0.793	0.822	1.6	0
03:34	2.1	87	0.87	7.5	0.72	0.83	29	27.4	33	44.1	0.663	0.702	1.6	0
03:36	2.1	87	0.87	7.5	0.71	0.81	28	26.3	32.3	44.1	0.639	0.657	1.6	0
03:37	1.9	87	0.78	6.6	0.63	0.81	26	26.1	32.2	44.8	0.572	0.659	1.6	0
03:39	2.2	87	0.92	7.8	0.74	0.81	28	25.3	31.5	42.3	0.669	0.723	1.6	0
03:40	2.6	87	1.08	9.3	0.88	0.81	34	27.5	33.9	37.3	0.92	0.963	1.6	0
03:42	2.7	87	1.12	9.6	0.92	0.82	36	28.4	34.6	37.3	0.975	0.911	1.6	0
03:43	2.4	87	0.98	8.4	0.82	0.83	35	30	36.1	43.2	0.803	0.933	1.6	0
03:45	2.8	86	1.15	9.8	0.98	0.86	38	29.6	34.5	33.3	1.138	1.099	1.6	0
03:46	2.5	86	1.02	8.7	0.87	0.86	37	31.6	36.8	41.4	0.896	1.008	1.6	0
03:48	2.5	86	1.04	8.9	0.91	0.87	38	32.3	36.9	35.3	1.067	1.031	1.6	0
03:50	2.3	87	0.96	8.2	0.85	0.88	37	33.9	38.3	39	0.953	1.05	1.6	0
03:51	2.4	87	1	8.6	0.91	0.9	37	32.6	36.1	33.3	1.099	1.068	1.6	0
03:53	2.3	87	0.94	8	0.84	0.89	35	32.4	36.3	37.5	0.93	0.998	1.6	0
03:55	2.3	88	0.94	8	0.85	0.91	35	32.8	36	32.3	1.074	1.073	1.6	0
03:57	2.3	88	0.96	8.2	0.86	0.9	35	32.4	35.9	32.8	1.065	1.105	1.6	0
03:58	2.3	88	0.96	8.2	0.88	0.92	37	33.8	36.7	37	0.995	1.134	1.6	0
04:02	1.4	89	0.57	4.9	0.5	0.88	19	28.9	32.9	19	0.991	1.033	1.6	0
04:03	2.9	89	1.18	10.1	1.01	0.86	39	28.9	33.8	38.2	1.011	0.997	1.6	0
04:05	2.7	89	1.09	9.3	0.94	0.86	36	29	33.6	37.3	0.97	0.994	1.6	0
04:07	2.8	89	1.12	9.6	0.99	0.88	38	30.3	34.5	32.4	1.17	1.143	1.6	0
04:08	2.7	89	1.09	9.3	0.96	0.88	38	30.7	34.9	34.9	1.08	1.185	1.6	0
04:10	2.2	88	0.9	7.7	0.8	0.89	34	32.9	37	37.3	0.917	1.063	1.6	0
04:12	2.6	88	1.04	8.9	0.93	0.89	37	31.2	35.1	32.8	1.115	1.034	1.6	0
04:13	2.4	88	0.98	8.4	0.87	0.88	34	30.5	34.6	36.1	0.951	1.038	1.6	0
04:15	2.3	89	0.95	8.1	0.85	0.89	35	31.8	35.7	37.5	0.927	1.006	1.6	0
04:17	2.1	89	0.85	7.3	0.74	0.87	30	31	35.7	31.1	0.971	0.93	1.6	0
04:22	0.8	90	0.34	2.9	0.28	0.81	12	30.1	36.9	12.7	0.924	0.758	1.6	0
04:24	3.2	90	1.29	11	0.97	0.75	35	23.9	31.9	32.3	1.075	1.177	1.6	0
04:25	3.1	89	1.27	10.9	0.97	0.77	39	26.6	34.7	43.2	0.905	1.119	1.6	0
04:26	3.3	89	1.35	11.5	1.08	0.8	42	27.9	34.9	39.5	1.072	1.089	1.6	0
04:28	3.2	89	1.32	11.3	1.1	0.83	43	29.9	36	33.7	1.289	1.342	1.6	0
04:30	3	88	1.23	10.5	1.07	0.87	44	32.2	37	34.3	1.276	1.339	1.6	0
04:32	2.8	88	1.12	9.6	1.01	0.89	42	33.8	37.8	33.7	1.248	1.266	1.6	0
04:33	2.3	88	0.93	7.9	0.84	0.91	37	35.1	38.7	38.5	0.967	1.039	1.6	0
04:35	2.3	88	0.96	8.2	0.89	0.93	39	35.5	38.3	38.2	1.011	0.977	1.6	0
04:37	2	88	0.8	6.9	0.74	0.92	31	33.6	36.6	32.6	0.95	0.995	1.6	0
04:38	2.2	88	0.92	7.9	0.83	0.91	34	32.4	35.6	34.7	0.976	1.05	1.6	0
04:40	2.3	87	0.95	8.2	0.86	0.9	34	31	34.5	36.6	0.928	0.951	1.6	2.5
04:42	2.3	87	0.93	8	0.85	0.91	34	32.1	35.3	33.7	1.007	1.059	1.6	2.5
04:44	2.3	87	0.93	8	0.83	0.89	33	32	35.8	31.4	1.065	1.038	1.6	2.5
04:46	2.2	86	0.91	7.8	0.8	0.88	32	30.6	34.9	31.7	0.995	1.037	1.6	2.5
04:48	2.5	86	1.01	8.7	0.89	0.88	35	30.6	34.9	30.3	1.142	1.183	1.6	2.5
04:49	2.3	86	0.95	8.2	0.83	0.87	34	31.1	35.7	39.2	0.876	0.989	1.6	2.5
04:51	2.8	88	1.14	9.8	1.02	0.89	40	31.7	35.6	33.9	1.188	1.197	1.6	2.5
04:53	2.5	88	1.01	8.6	0.9	0.89	37	32.4	36.3	34.9	1.059	1.164	1.6	2.5
04:54	2.5	89	1.03	8.8	0.94	0.91	39	33.8	37.4	36.6	1.076	1.144	1.6	2.5
04:56	2.4	89	0.99	8.5	0.89	0.9	37	33	36.9	37.7	0.989	0.93	1.6	2.5
04:58	2.6	89	1.06	9.1	0.96	0.9	38	32.2	35.6	33.1	1.147	1.182	1.6	2.5
04:59	2.4	90	1	8.6	0.9	0.9	37	33.1	36.6	34.9	1.068	1.155	1.6	2.5
05:01	2.6	90	1.06	9.1	0.96	0.9	38	32	35.5	35.1	1.087	1.075	1.6	2.5
05:03	2.5	90	1.03	8.8	0.93	0.9	38	32.4	36	35.3	1.063	1.065	1.6	2.5
05:05	2.4	91	1	8.5	0.91	0.91	37	33.5	37	31.9	1.169	1.262	1.6	2.5
05:07	2.6	91	1.05	9	0.95	0.91	38	32.4	35.7	31.9	1.186	1.164	1.6	2.5
05:08	2.4	91	0.99	8.4	0.87	0.88	35	31.2	35.4	36.1	0.969	1.024	1.6	2.5
05:10	2.7	93	1.09	9.3	0.98	0.9	38	31.5	34.9	31.7	1.197	1.197	1.6	2.5
05:12	2.5	93	1.02	8.7	0.9	0.88	35	30.4	34.7	34.3	1.027	1.024	1.6	2.5
05:14	2.6	93	1.06	9.1	0.94	0.88	36	31	35	30.6	1.191	1.241	1.6	2.5
05:17	2.1	93	0.87	7.5	0.76	0.87	25	25.9	29.8	22.5	1.128	1.318	1.6	2.5
05:19	2.5	93	1.04	8.9	0.89	0.86	34	29.3	34.3	29	1.171	1.296	1.6	2.5
05:20	2.5	93	1.04	8.9	0.88	0.85	36	29.8	35.2	39	0.913	0.973	1.6	2.5
05:22	2.7	93	1.11	9.5	0.94	0.85	38	30.5	35.8	35.5	1.069	1.09	1.6	2.5
05:23	2.9	93	1.19	10.1	1.01	0.85	39	29.6	34.7	35.9	1.096	1.132	1.6	2.5
05:25	2.7	92	1.09	9.3	0.93	0.85	38	30.6	35.9	40	0.952	0.961	1.6	2.5
05:27	2.4	92	0.97	8.3	0.83	0.85	32	28.7	33.8	37.3	0.871	0.968	1.6	2.5
05:29	2.3	92	0.92	7.9	0.78	0.84	29	27.9	33.3	30.5	0.967	0.857	1.6	2.5
05:30	2.4	91	0.96	8.2	0.78	0.81	32	27.6	34	45.5	0.704	0.879	1.6	2.5
05:31	3	91	1.21	10.4	1.01	0.83	41	29.2	35.1	42	0.966	1.079	1.6	2.5
05:33	3.2	91	1.31	11.2	1.13	0.87	44	30.4	35.1	34.9	1.26	1.341	1.6	2.5
05:35	3.1	91	1.28	10.9	1.12	0.88	44	31.4	35.7	35.5	1.249	1.289	1.6	2.5
05:36	2.8	91	1.13	9.7	1	0.89	42	32.5	36.6	42.3	0.989	1.069	1.6	2.5
05:38	2.8	91	1.14	9.8	1.02	0.9	42	33	36.7	36.6	1.148	1.151	1.6	2.5
05:40	2.9	91	1.19	10.2	1.1	0.92	42	33	35.8	24.4	1.73	1.805	1.6	2.5
05:42	2.5	91	1.04	8.9	0.95	0.91	39	32.9	36.1	39.2	0.99	1.016	1.6	2.5
05:43	2.3	91	0.92	7.9	0.83	0.9	34	31.6	35.1	43.5	0.789	0.92	1.6	2.5
05:45	2.6	91	1.06	9.1	0.97	0.91	38	31.4	34.4	39.2	0.969	0.979	1.6	2.5
05:46	2.5	91	1.02	8.8	0.93	0.91	37	31.8	35.1	40.5	0.924	1.042	1.6	2.5
05:48	2.8	91	1.13	9.7	1.02	0.91	40	31.3	34.6	41.1	0.98	0.992	1.6	2.5
05:49	2.7	92	1.12	9.6	1.02	0.91	41	32.1	35.3	38.7	1.049	1.073	1.6	2.5
05:50	2.4	92	0.97	8.3	0.88	0.91	36	31.5	34.7	45.8	0.787	0.932	1.6	2.5
05:52	2.8	92	1.15	9.9	1.04	0.9	40	30.5	33.8	41.4	0.968	1.067	1.6	2.5
05:54	3.1	92	1.26	10.8	1.15	0.91	44	31.9	35.1	35.5	1.253	1.248	1.6	2.5
05:55	2.8	93	1.15	9.8	1.05	0.91	42	32.5	35.6	39.7	1.058	1.106	1.6	2.5
05:57	2.4	93	1	8.5	0.9	0.91	37	31.6	34.9	43.5	0.845	0.901	1.6	2.5
05:58	2.2	93	0.88	7.6	0.79	0.89	31	28.8	32.3	44.4	0.693	0.812	1.6	2.5
05:59	2.5	93	1.03	8.8	0.91	0.88	35	29.2	33.1	40.5	0.863	0.948	1.6	2.5
06:01	2.7	93	1.12	9.6	0.99	0.88	37	29	33	36.6	1.011	1.045	1.6	2.5
06:03	2.6	93	1.07	9.2	0.94	0.88	36	29.1	33.1	37	0.959	1.024	1.6	2.5
06:04	2.7	93	1.11	9.5	0.98	0.89	38	30.3	34.3	36.4	1.044	1.135	1.6	2.5
06:07	2.9	93	1.2	10.3	1.08	0.9	41	31.7	35.1	22.5	1.815	1.903	1.6	2.5
06:09	2.3	93	0.93	7.9	0.82	0.88	33	30.5	34.7	37.7	0.871	0.929	1.6	2.5
06:10	2.6	92	1.06	9.1	0.93	0.88	37	29.7	33.8	41.7	0.876	0.88	1.6	2.5
06:11	2.6	92	1.08	9.3	0.95	0.88	37	29.8	33.9	42.6	0.878	0.949	1.6	2.5
06:13	2.4	92	0.99	8.5	0.85	0.86	34	28.9	33.6	47.2	0.727	0.784	1.6	2.5
06:14	2.7	92	1.09	9.3	0.96	0.88	39	30.6	34.8	43.8	0.881	0.955	1.6	2.5
06:15	2.5	92	1.03	8.8	0.9	0.87	35	29.2	33.6	42.9	0.822	0.904	1.6	2.5
06:17	2.5	92	1.03	8.8	0.89	0.87	36	29.4	33.9	43.8	0.811	0.845	1.6	2.5
06:18	3	92	1.21	10.4	1.07	0.88	42	30.8	35	38.5	1.092	1.126	1.6	2.5
06:20	2.6	91	1.07	9.2	0.94	0.88	39	31.2	35.5	45.1	0.863	0.917	1.6	2.5
06:21	2.8	91	1.13	9.7	1.01	0.89	40	31.2	34.9	42	0.959	0.947	1.6	2.5
06:23	2.8	91	1.13	9.6	1	0.89	41	32.1	36.1	40.3	1.019	1.053	1.6	2.5
06:24	2.6	91	1.08	9.2	0.96	0.89	38	31.3	35	38.5	0.996	1.065	1.6	2.5
06:26	2.5	90	1.02	8.7	0.91	0.89	38	32.1	35.9	41.1	0.917	1.033	1.6	2.5
06:27	2.9	90	1.17	10	1.05	0.9	41	31.5	34.9	36.1	1.136	1.057	1.6	2.5
06:29	2.7	90	1.09	9.3	0.98	0.9	39	31.4	34.9	37.3	1.037	1.197	1.6	2.5
06:30	2.6	90	1.05	9	0.94	0.9	39	32	35.6	42.3	0.916	1.025	1.6	2.5
06:32	2.3	90	0.95	8.1	0.85	0.9	36	33.2	37	42.3	0.863	0.942	1.6	2.5
06:33	2.7	90	1.12	9.6	1.01	0.9	41	32.6	36.1	36.4	1.125	1.084	1.6	2.5
06:35	2.5	93	1.04	8.9	0.93	0.89	38	31.8	35.5	42	0.908	0.979	1.6	2.5
06:36	2.6	93	1.06	9.1	0.95	0.89	39	31.3	35.2	43.8	0.882	0.951	1.6	2.5
06:38	2.6	93	1.08	9.3	0.97	0.89	39	31.9	35.7	40.5	0.971	1.014	1.6	2.5
06:40	1.8	93	0.73	6.2	0.62	0.86	22	25.1	29.3	27.5	0.784	0.894	1.6	5
06:44	2.9	93	1.18	10.1	1.06	0.9	38	30.6	33.9	13.7	2.755	2.831	1.6	5
06:45	2.2	93	0.89	7.7	0.76	0.85	30	27.1	31.9	46.2	0.644	1.081	1.6	5
06:47	2.4	93	0.99	8.5	0.83	0.84	32	27.1	32.3	47.2	0.687	0.695	1.6	5
06:48	2.4	93	0.97	8.3	0.8	0.82	31	26.1	31.7	44.1	0.693	0.662	1.6	5
06:50	2.9	93	1.2	10.2	1	0.84	38	28.1	33.6	37.3	1.021	1.157	1.6	5
06:51	2.8	93	1.13	9.7	0.94	0.83	39	29.8	36	47.2	0.835	0.887	1.6	5
06:52	2.8	93	1.13	9.6	0.94	0.83	39	29.8	35.7	43.8	0.886	0.925	1.6	5
06:54	3.2	93	1.31	11.2	1.13	0.86	44	30.2	35.2	36.4	1.211	1.228	1.6	5
06:56	3.1	93	1.27	10.9	1.11	0.87	44	31.1	35.8	37.3	1.184	1.234	1.6	5
06:57	2.8	93	1.14	9.7	1	0.87	39	30.1	34.4	36.6	1.057	1.072	1.6	5
06:59	2.8	93	1.15	9.8	1	0.88	41	32.1	36.6	38.7	1.069	1.224	1.6	5
07:00	2.8	94	1.13	9.6	0.99	0.88	40	31.1	35.5	43.2	0.93	0.944	1.6	5
07:02	2.9	94	1.18	10.1	1.04	0.88	42	31.3	35.5	45.1	0.935	0.94	1.6	5
07:03	2.9	94	1.18	10.1	1.05	0.89	42	31.6	35.7	39.5	1.065	1.12	1.6	5
07:05	2.8	96	1.13	9.6	1	0.89	41	32.2	36.1	38.2	1.07	1.188	1.6	5
07:06	2.8	96	1.15	9.8	1.01	0.89	41	30.8	34.8	46.9	0.874	0.887	1.6	5
07:07	2.9	96	1.17	10	1.03	0.89	41	30.8	34.7	44.8	0.921	0.926	1.6	5
07:09	2.8	96	1.16	9.9	1.02	0.88	42	31	35	47.6	0.874	0.964	1.6	5
07:10	2.8	96	1.15	9.9	1.02	0.88	41	31.2	35.3	45.5	0.911	0.918	1.6	5
07:11	2.8	96	1.14	9.7	1	0.88	40	30.7	35	44.1	0.912	0.985	1.6	5
07:13	2.8	96	1.15	9.9	1.01	0.88	41	31.1	35.4	43.5	0.944	1.022	1.6	5
07:14	3.2	96	1.33	11.4	1.17	0.88	45	30.3	34.4	38.5	1.165	1.138	1.6	5
07:16	3	97	1.21	10.4	1.07	0.89	41	30.3	34.2	38.7	1.069	1.159	1.6	5
07:17	2.7	97	1.12	9.6	0.99	0.88	41	31.5	35.6	45.8	0.889	0.968	1.6	5
07:18	2.8	97	1.16	9.9	1.02	0.88	42	31.7	35.9	44.4	0.947	1.031	1.6	5
07:21	1.6	98	0.67	5.7	0.55	0.83	17	21.5	25.8	23.2	0.738	0.841	1.6	5
07:22	3.2	98	1.32	11.3	1.07	0.81	39	25.8	31.7	39.5	0.981	1.032	1.6	5
07:24	3.3	98	1.37	11.7	1.13	0.83	42	27.3	32.9	39.2	1.072	1.225	1.6	5
07:26	3.2	99	1.33	11.4	1.1	0.83	40	26.4	31.9	38.7	1.026	1.032	1.6	5
07:27	3.2	99	1.31	11.2	1.1	0.84	41	28	33.4	37	1.11	1.242	1.6	5
07:29	3.4	99	1.4	12	1.2	0.86	46	29.5	34.3	35.5	1.284	1.39	1.6	5
07:31	3.2	98	1.33	11.4	1.16	0.88	44	30.4	34.7	32.1	1.377	1.345	1.6	5
07:33	3.1	98	1.28	10.9	1.14	0.89	45	31.9	35.8	31.7	1.403	1.511	1.6	5
07:34	2.8	98	1.14	9.8	1.01	0.89	40	31.2	35.2	37.3	1.077	1.154	1.6	5
07:36	2.9	98	1.17	10	1.03	0.89	41	30.6	34.6	40.8	0.997	1.095	1.6	5
07:37	3.1	98	1.26	10.8	1.12	0.89	45	31.9	35.7	39.2	1.144	1.191	1.6	5
07:39	3	98	1.22	10.5	1.1	0.9	42	31.3	34.8	34.7	1.225	1.216	1.6	5
07:41	2.8	99	1.14	9.7	1.01	0.89	40	31.5	35.3	34.3	1.161	1.24	1.6	5
07:42	2.9	99	1.19	10.2	1.06	0.9	42	32	35.7	37	1.146	1.274	1.6	5
07:44	3	99	1.22	10.4	1.1	0.91	41	30.3	33.4	35.7	1.151	1.187	1.6	5
07:46	3.1	100	1.28	10.9	1.15	0.9	43	30.8	34.3	32.1	1.347	1.367	1.6	5
07:47	3	100	1.21	10.4	1.09	0.9	43	31.9	35.5	37.5	1.148	1.277	1.6	5
07:49	3.2	100	1.3	11.2	1.19	0.91	46	32	35.1	35.9	1.283	1.302	1.6	5
07:51	3.1	100	1.27	10.8	1.16	0.92	45	32.3	35.2	35.7	1.264	1.356	1.6	5
07:52	3.2	100	1.31	11.2	1.2	0.92	48	33.4	36.4	37.7	1.279	1.321	1.6	5
07:54	3	100	1.22	10.4	1.13	0.93	44	32.4	35	37.5	1.172	1.209	1.6	5
07:55	2.7	100	1.12	9.6	1.03	0.92	42	32.7	35.5	42	0.99	1.051	1.6	5
07:57	3	100	1.23	10.6	1.15	0.93	45	33	35.6	35.7	1.26	1.311	1.6	5
07:59	2.9	100	1.2	10.3	1.11	0.93	43	32.4	34.9	35.7	1.208	1.277	1.6	5
08:01	3	100	1.23	10.6	1.14	0.92	44	32.1	34.8	35.1	1.247	1.278	1.6	5
08:02	2.9	100	1.19	10.2	1.09	0.92	45	33.3	36.3	42.3	1.055	1.141	1.6	5
08:03	2.5	100	1.01	8.7	0.91	0.9	36	30.3	33.6	43.2	0.829	0.83	1.6	5
08:05	2.8	100	1.16	9.9	1.04	0.9	42	31.9	35.5	43.2	0.976	1.116	1.6	5
08:06	3	100	1.23	10.5	1.1	0.9	43	30.5	34	42.6	1	1.038	1.6	5
08:07	2.7	100	1.12	9.6	1	0.89	40	30.6	34.6	45.8	0.871	0.987	1.6	5
08:09	3.2	100	1.3	11.1	1.17	0.9	45	30.7	34.2	43.5	1.036	1.098	1.6	5
08:10	3	100	1.24	10.6	1.11	0.89	42	30.3	33.8	38	1.109	1.097	1.6	5
08:12	3	100	1.24	10.6	1.12	0.9	43	31	34.3	35.7	1.194	1.319	1.6	5
08:14	3	100	1.21	10.3	1.09	0.9	42	31.2	34.4	36.6	1.147	1.205	1.6	5
08:15	3	100	1.21	10.4	1.08	0.89	43	31.7	35.5	40.5	1.067	1.096	1.6	5
08:16	2.8	100	1.16	9.9	1.04	0.9	42	31.8	35.4	45.8	0.927	0.971	1.6	5
08:18	2.9	100	1.17	10	1.04	0.89	42	30.6	34.3	46.9	0.886	0.948	1.6	5
08:19	3	99	1.22	10.4	1.09	0.9	43	31.3	34.8	42.6	1.015	1.044	1.6	5
08:21	2.7	99	1.12	9.6	1	0.9	40	31.7	35.4	36.6	1.091	1.094	1.6	5
08:23	3.1	99	1.27	10.8	1.13	0.9	43	30.9	34.4	33.9	1.273	1.366	1.6	5
08:24	2.9	99	1.17	10	1.04	0.89	41	31	34.7	39	1.049	1.151	1.6	5
08:26	3	99	1.24	10.6	1.12	0.9	43	31	34.4	34.9	1.219	1.247	1.6	5
08:27	3	99	1.23	10.5	1.1	0.9	42	30.7	34.3	36.8	1.148	1.203	1.6	5
08:29	3	99	1.21	10.3	1.07	0.89	42	30.9	34.7	38	1.102	1.137	1.6	5
08:31	3.2	99	1.29	11.1	1.15	0.89	45	31.2	35	37.3	1.202	1.211	1.6	5
08:32	2.8	99	1.15	9.9	1.04	0.9	40	30.9	34.3	37.7	1.062	1.126	1.6	5
08:34	3.1	99	1.26	10.8	1.15	0.91	44	31.7	34.8	33.3	1.319	1.442	1.6	5
08:36	3	98	1.21	10.4	1.1	0.9	41	30.6	33.8	34.7	1.191	1.2	1.6	7
08:38	3	98	1.22	10.5	1.1	0.9	41	30.5	33.9	30.5	1.345	1.331	1.6	7
08:39	3	98	1.21	10.3	1.08	0.9	41	30.6	34.1	35.1	1.174	1.317	1.6	7.5
08:42	3	98	1.22	10.4	1.09	0.9	39	29.6	32.9	23.8	1.631	1.646	1.6	7.5
08:44	2.6	98	1.05	9	0.92	0.88	35	29.3	33.4	32.4	1.072	1.136	1.6	7.5
08:46	3	99	1.22	10.4	1.07	0.88	40	29.7	33.8	28.8	1.373	1.5	1.6	7.5
08:48	3.1	99	1.27	10.8	1.11	0.88	40	29.1	33.1	24.3	1.637	1.703	1.6	7.5
08:50	3	100	1.21	10.4	1.05	0.86	38	28.7	33.2	29.6	1.296	1.307	1.6	7.5
08:52	3	100	1.24	10.6	1.08	0.87	40	29.5	34	31.9	1.266	1.339	1.6	7.5
08:54	3.1	100	1.28	10.9	1.1	0.86	41	28.9	33.6	35.7	1.153	1.233	1.6	7.5
08:56	3.4	100	1.39	11.9	1.21	0.87	45	29.3	33.6	32.3	1.382	1.43	1.6	7.5
08:58	3.1	100	1.28	11	1.13	0.88	44	30.7	34.7	35.1	1.241	1.421	1.6	7.5
08:59	3.3	101	1.35	11.6	1.21	0.89	44	29.5	33.1	37.5	1.184	1.244	1.6	7.5
09:01	3.3	101	1.35	11.5	1.21	0.9	45	30.8	34.1	32.4	1.395	1.475	1.6	7.5
09:03	3.2	101	1.31	11.2	1.15	0.88	43	29.6	33.6	37.7	1.146	1.192	1.6	7.5
09:04	3.2	102	1.32	11.3	1.18	0.9	43	29.3	32.8	33.5	1.271	1.374	1.6	7.5
09:06	3.3	102	1.33	11.4	1.19	0.89	44	30.1	33.7	32.1	1.368	1.383	1.6	7.5
09:08	3	102	1.24	10.6	1.1	0.89	42	30.3	34	35.7	1.171	1.298	1.6	7.5
09:10	3.4	103	1.38	11.8	1.23	0.89	46	30.3	33.9	34.5	1.333	1.349	1.6	7.5
09:11	3.1	103	1.27	10.9	1.13	0.89	43	30.1	33.8	35.5	1.199	1.26	1.6	7.5
09:13	3.2	103	1.32	11.3	1.19	0.9	44	30.4	33.8	33.7	1.314	1.433	1.6	7.5
09:15	3.2	105	1.31	11.2	1.16	0.89	43	29.5	33.1	35.7	1.198	1.278	1.6	7.5
09:16	3.2	105	1.3	11.1	1.15	0.89	44	30.1	33.8	39.7	1.101	1.228	1.6	7.5
09:18	3.6	105	1.47	12.6	1.33	0.91	49	30.6	33.8	35.5	1.385	1.438	1.6	7.5
09:20	3.4	106	1.39	11.9	1.26	0.9	48	31.1	34.5	38	1.26	1.329	1.6	7.5
09:21	3.5	106	1.45	12.4	1.32	0.91	50	31.4	34.4	39.2	1.281	1.345	1.6	7.5
09:23	3.2	106	1.32	11.3	1.22	0.92	46	32.3	34.9	32.8	1.417	1.454	1.6	7.5
09:25	3.3	108	1.37	11.7	1.24	0.91	47	31.3	34.4	34.5	1.362	1.394	1.6	7.5
09:26	3.3	108	1.36	11.7	1.23	0.91	45	29.8	32.9	35.5	1.264	1.383	1.6	7.5
09:28	3.6	108	1.45	12.4	1.34	0.92	49	31	33.5	36.4	1.358	1.476	1.6	7.5
09:30	3.3	109	1.33	11.4	1.22	0.92	45	30.5	33.3	35.9	1.248	1.295	1.6	7.5
09:31	3.3	109	1.37	11.7	1.27	0.93	48	31.9	34.4	35.7	1.342	1.493	1.6	7.5
09:33	3.6	109	1.46	12.5	1.36	0.93	51	32.1	34.4	31.9	1.585	1.586	1.6	7.5
09:35	3.2	108	1.29	11.1	1.2	0.93	46	31.8	34.3	38.2	1.197	1.309	1.6	7.5
09:36	3.3	108	1.33	11.4	1.24	0.93	46	31.5	33.7	38	1.223	1.334	1.6	7.5
09:38	3.3	108	1.36	11.6	1.26	0.93	47	31.6	34.1	37.7	1.258	1.301	1.6	7.5
09:40	3	107	1.23	10.6	1.13	0.92	42	30.1	32.8	37.7	1.106	1.186	1.6	7.5
09:41	3.3	107	1.34	11.5	1.24	0.92	47	31.8	34.4	37.3	1.266	1.355	1.6	7.5
09:43	3.3	107	1.35	11.5	1.24	0.92	46	31	33.7	32.8	1.395	1.442	1.6	7.5
09:45	3.4	107	1.4	12	1.27	0.91	48	30.6	33.8	39.5	1.206	1.292	1.6	7.5
09:46	3.2	107	1.32	11.3	1.21	0.92	45	30.8	33.6	36.4	1.239	1.322	1.6	7.5
09:48	3.1	107	1.28	11	1.17	0.91	43	30.4	33.3	35.5	1.218	1.281	1.6	7.5
09:50	3.6	106	1.46	12.5	1.35	0.92	50	31.2	33.7	33.5	1.482	1.552	1.6	7.5
09:51	3.4	106	1.4	12	1.29	0.93	48	31.5	34.1	34.7	1.392	1.505	1.6	7.5
09:53	3.3	106	1.35	11.5	1.25	0.92	48	32.1	34.7	38.5	1.245	1.334	1.6	7.5
09:55	3.3	106	1.33	11.4	1.22	0.92	45	30.5	33.1	36.6	1.229	1.269	1.6	7.5
09:56	3.2	106	1.32	11.3	1.22	0.92	45	30.9	33.5	33	1.358	1.468	1.6	7.5
09:58	3.3	106	1.35	11.6	1.25	0.93	46	30.6	33.1	35.1	1.301	1.435	1.6	7.5
10:00	3.3	106	1.35	11.5	1.23	0.92	45	30	32.7	35.7	1.252	1.29	1.6	7.5
10:01	3.1	106	1.28	10.9	1.18	0.92	45	31.5	34.1	38	1.18	1.344	1.6	7.5
10:03	3.1	106	1.25	10.7	1.14	0.91	42	29.9	32.9	39.7	1.064	1.089	1.6	7.5
10:05	3.3	106	1.35	11.6	1.23	0.91	44	29.4	32.4	35.7	1.23	1.338	1.6	7.5
10:06	3.4	106	1.39	11.9	1.25	0.9	46	29.8	33.1	37.7	1.218	1.224	1.6	7.5
10:08	3.3	106	1.36	11.7	1.25	0.92	46	30.4	33.2	35.5	1.29	1.448	1.6	7.5
10:10	3.7	106	1.51	12.9	1.39	0.92	51	30.9	33.6	35.3	1.442	1.471	1.6	7.5
10:11	3.4	106	1.37	11.7	1.26	0.92	49	32.3	35	35.7	1.359	1.491	1.6	7.5
10:13	3.3	106	1.36	11.6	1.27	0.94	48	32.2	34.5	36.4	1.324	1.415	1.6	7.5
10:14	3.2	106	1.32	11.3	1.23	0.93	48	32.8	35.1	38.2	1.249	1.377	1.6	7.5
10:16	3.4	106	1.41	12	1.32	0.94	49	31.7	33.8	36.4	1.343	1.363	1.6	7.5
10:18	3.5	106	1.41	12.1	1.33	0.94	50	32	34.1	35.9	1.38	1.439	1.6	7.5
10:20	3.3	106	1.35	11.6	1.27	0.94	48	32.4	34.5	35.3	1.361	1.403	1.6	7.5
10:21	3.3	106	1.35	11.6	1.26	0.93	47	31.4	33.7	37.5	1.252	1.335	1.6	7.5
10:23	3.4	106	1.38	11.8	1.29	0.94	48	31.7	33.9	34.5	1.391	1.457	1.6	7.5
10:25	3.5	107	1.43	12.3	1.34	0.93	50	31.9	34.2	35.3	1.417	1.438	1.6	7.5
10:26	3.6	107	1.45	12.4	1.37	0.94	51	32	34.1	38.5	1.331	1.423	1.6	7.5
10:28	3.1	107	1.29	11	1.2	0.93	45	31.3	33.6	38.7	1.162	1.265	1.6	7.5
10:29	3.2	108	1.32	11.3	1.23	0.93	46	31.5	33.7	39.7	1.168	1.242	1.6	9
10:31	3.3	108	1.33	11.4	1.23	0.93	45	30.6	33	36.4	1.24	1.294	1.6	9
10:32	3.5	108	1.44	12.3	1.33	0.93	48	30.3	32.8	36.1	1.325	1.399	1.6	9
10:34	3.2	107	1.32	11.3	1.24	0.94	47	32.2	34.3	34.7	1.347	1.492	1.6	10
10:36	3.4	107	1.38	11.8	1.29	0.93	49	31.9	34.2	37.3	1.302	1.422	1.6	10
10:37	3.5	107	1.45	12.4	1.36	0.94	51	32	34.1	37.3	1.359	1.427	1.6	10
10:39	3.3	107	1.35	11.6	1.26	0.93	49	32.5	34.8	39	1.248	1.298	1.6	10
10:40	3.6	108	1.46	12.5	1.37	0.94	52	32.2	34.2	39.2	1.314	1.502	1.6	10
10:42	3.2	108	1.29	11.1	1.21	0.94	48	32.6	34.8	44.4	1.069	1.103	1.6	10
10:43	3.6	108	1.48	12.7	1.4	0.95	52	31.9	33.7	38.2	1.357	1.437	1.6	10
10:45	3.3	109	1.36	11.7	1.29	0.95	48	32.4	34.2	36.1	1.339	1.392	1.6	10
10:47	3.3	109	1.37	11.7	1.29	0.94	47	31.2	33.2	37.5	1.259	1.354	1.6	10
10:48	3.5	109	1.42	12.1	1.33	0.94	51	32.6	34.7	38	1.334	1.422	1.6	10
10:50	3.5	109	1.44	12.3	1.35	0.94	50	31.7	33.8	36.1	1.379	1.46	1.6	10
10:51	3.7	109	1.5	12.8	1.41	0.94	53	32.5	34.5	39.7	1.343	1.427	1.6	10
10:53	3.5	109	1.44	12.3	1.35	0.94	53	33.2	35.3	42.3	1.251	1.317	1.6	10
10:55	3.6	110	1.48	12.7	1.41	0.95	53	33	34.6	35.5	1.498	1.522	1.6	10
10:56	3.1	110	1.28	11	1.19	0.93	45	31.5	33.9	37.7	1.189	1.238	1.6	10
10:58	3.3	110	1.35	11.6	1.26	0.93	47	31.2	33.4	37.3	1.253	1.393	1.6	10
10:59	3.5	111	1.43	12.3	1.32	0.93	50	31.3	33.9	40.3	1.234	1.287	1.6	10
11:01	3.5	111	1.45	12.4	1.35	0.93	50	31.5	33.7	35.9	1.387	1.488	1.6	10
11:03	3.4	111	1.38	11.9	1.27	0.92	48	31.2	33.9	36.6	1.3	1.402	1.6	10
11:04	3.6	111	1.48	12.6	1.36	0.92	50	31.1	33.8	38	1.329	1.416	1.6	10
11:06	3.7	112	1.5	12.8	1.39	0.93	52	31.8	34.3	35.7	1.452	1.502	1.6	10
11:07	3.6	112	1.49	12.8	1.39	0.93	52	32.2	34.6	38.2	1.374	1.484	1.6	10
11:09	3.5	112	1.42	12.1	1.32	0.93	49	31.2	33.5	39.7	1.233	1.346	1.6	10
11:10	3.4	112	1.39	11.9	1.29	0.93	49	31.8	34.3	41.4	1.187	1.277	1.6	10
11:12	3.8	112	1.56	13.4	1.45	0.93	55	31.9	34.3	40.5	1.347	1.373	1.6	10
11:14	3.5	112	1.44	12.3	1.33	0.93	48	30.7	33.1	32.3	1.488	1.437	1.6	10
11:15	3.7	112	1.51	12.9	1.39	0.92	51	31.1	33.7	37	1.383	1.555	1.6	10
11:17	3.8	112	1.56	13.4	1.46	0.93	51	30.3	32.5	34.5	1.491	1.585	1.6	10
11:18	3.7	112	1.52	13	1.42	0.93	54	31.9	34.3	42	1.277	1.439	1.6	10
11:20	3.8	113	1.54	13.2	1.46	0.95	53	31.9	33.6	35.9	1.487	1.558	1.6	10
11:22	3.7	113	1.5	12.8	1.42	0.94	53	32.2	34.1	38.7	1.37	1.497	1.6	10
11:24	3.6	114	1.49	12.8	1.42	0.95	50	31.4	33	24	2.074	2.061	1.6	10
11:26	3.4	114	1.39	11.9	1.29	0.93	46	30.5	32.8	31.4	1.469	1.577	1.6	10
11:28	3.8	114	1.56	13.4	1.44	0.92	52	30	32.6	42.3	1.229	1.384	1.6	10
11:29	4	114	1.64	14	1.52	0.93	53	29.8	32	37.3	1.429	1.503	1.6	10
11:31	3.9	115	1.59	13.6	1.49	0.94	54	31.4	33.4	36.4	1.493	1.604	1.6	10
11:33	3.3	115	1.35	11.6	1.25	0.92	45	30.3	32.8	34.1	1.321	1.291	1.6	10
11:34	3.8	115	1.53	13.1	1.41	0.92	50	29.9	32.5	38.2	1.32	1.481	1.6	10
11:36	4	116	1.62	13.8	1.51	0.93	55	31.2	33.4	36.1	1.517	1.612	1.6	10
11:38	3.8	116	1.55	13.3	1.47	0.94	52	31	32.8	30.5	1.7	1.713	1.6	10
11:39	3.8	115	1.53	13.1	1.45	0.95	53	31.8	33.6	35.3	1.502	1.667	1.6	10
11:41	3.8	115	1.55	13.3	1.47	0.94	54	31.8	33.7	38.2	1.413	1.458	1.6	10
11:43	3.8	115	1.56	13.4	1.48	0.95	54	31.8	33.5	33.9	1.583	1.629	1.6	10
11:45	3.7	115	1.53	13.1	1.46	0.95	53	32	33.6	33.3	1.587	1.641	1.6	10
11:46	3.5	115	1.43	12.3	1.35	0.94	48	30.9	32.7	34.5	1.401	1.536	1.6	10
11:48	3.8	115	1.55	13.3	1.45	0.93	50	29.9	31.9	31.1	1.612	1.598	1.6	10
11:51	3.5	116	1.44	12.3	1.35	0.94	44	28.9	30.8	22.1	1.999	2.073	1.6	10
11:54	3.7	116	1.51	12.9	1.43	0.95	48	30.2	31.9	19.5	2.462	2.713	1.6	10
11:56	3.8	116	1.56	13.4	1.43	0.91	50	28.9	31.7	36.6	1.354	1.496	1.6	10
11:57	3.9	116	1.6	13.7	1.46	0.91	51	29.5	32.3	35.5	1.449	1.42	1.6	10
11:59	3.9	117	1.6	13.7	1.49	0.93	52	30.1	32.5	33.5	1.559	1.673	1.6	10
12:01	3.8	117	1.57	13.5	1.45	0.92	51	30	32.4	33.9	1.51	1.596	1.6	10
12:03	3.9	117	1.59	13.6	1.48	0.93	51	29.6	31.7	34.1	1.499	1.656	1.6	10
12:04	3.9	117	1.57	13.5	1.46	0.93	52	30.2	32.6	36.6	1.421	1.46	1.6	10
12:06	4	117	1.63	13.9	1.53	0.94	55	31	33.1	36.6	1.499	1.599	1.6	10
12:07	3.9	117	1.6	13.7	1.5	0.94	55	31.1	33.1	39	1.399	1.461	1.6	10
12:09	4.1	117	1.69	14.5	1.6	0.95	58	31.6	33.3	37.5	1.543	1.612	1.6	10
12:11	3.9	117	1.58	13.5	1.5	0.95	54	31.9	33.5	33.7	1.613	1.675	1.6	10
12:13	3.8	117	1.57	13.4	1.49	0.95	53	31	32.6	35.5	1.489	1.597	1.6	10
12:14	3.6	117	1.47	12.6	1.39	0.95	49	30.9	32.6	35.1	1.411	1.5	1.6	10
12:16	3.9	117	1.59	13.6	1.52	0.96	54	31.4	32.8	36.1	1.505	1.663	1.6	10
12:18	4	117	1.65	14.1	1.58	0.96	56	31.4	32.7	36.6	1.535	1.545	1.6	10
12:19	3.8	118	1.55	13.3	1.49	0.96	54	31.6	33.1	37.7	1.422	1.602	1.6	10
12:21	4	118	1.65	14.1	1.58	0.96	58	32.1	33.4	41.7	1.389	1.537	1.6	10
12:22	4.1	118	1.67	14.3	1.62	0.97	58	32.1	33.2	39	1.499	1.499	1.6	10
12:24	3.8	118	1.55	13.3	1.5	0.97	55	32.5	33.6	38	1.446	1.53	1.6	10
12:25	3.9	118	1.58	13.6	1.54	0.97	55	31.9	32.8	35.3	1.55	1.638	1.6	10
12:27	3.9	118	1.58	13.5	1.54	0.97	55	32.3	33.2	36.6	1.515	1.625	1.6	10
12:29	3.8	118	1.56	13.4	1.52	0.97	55	32.4	33.5	35.5	1.548	1.623	1.6	10
12:30	3.9	117	1.6	13.7	1.55	0.97	55	31.7	32.7	37.5	1.477	1.594	1.6	10
12:32	3.9	117	1.61	13.8	1.57	0.97	58	32.7	33.7	39.7	1.448	1.598	1.6	10
12:33	4	117	1.62	13.9	1.59	0.98	60	34.2	34.9	38.7	1.55	1.672	1.6	10
12:35	4	118	1.65	14.2	1.63	0.99	60	33.8	34.2	37.3	1.62	1.671	1.6	12.5
12:37	3.7	118	1.52	13	1.48	0.98	54	32.9	33.7	37.3	1.46	1.539	1.6	12.5
12:38	3.9	118	1.59	13.6	1.56	0.98	57	33.2	33.8	38	1.506	1.617	1.6	12.5
12:40	3.8	120	1.56	13.4	1.54	0.99	57	34.1	34.6	34.9	1.646	1.785	1.6	12.5
12:42	3.8	120	1.55	13.3	1.52	0.98	55	33	33.7	34.9	1.59	1.587	1.6	12.5
12:43	4	120	1.63	13.9	1.6	0.98	58	32.8	33.4	34.5	1.67	1.791	1.6	12.5
12:45	4.1	121	1.67	14.3	1.63	0.98	61	33.3	34.2	39.2	1.543	1.688	1.6	12.5
12:47	3.9	121	1.6	13.7	1.59	0.99	56	32.9	33	25.2	2.203	2.244	1.6	12.5
12:49	3.6	121	1.48	12.7	1.42	0.96	50	31.2	32.4	33.1	1.509	1.617	1.6	12.5
12:51	3.9	122	1.59	13.6	1.52	0.95	53	30.9	32.4	33.1	1.607	1.64	1.6	12.5
12:53	3.8	122	1.56	13.4	1.49	0.96	53	30.9	32.4	34.7	1.514	1.725	1.6	12.5
12:54	4	122	1.65	14.1	1.56	0.95	56	31	32.6	39.5	1.414	1.556	1.6	12.5
12:56	4.2	122	1.73	14.8	1.67	0.96	60	32	33.3	38.7	1.555	1.628	1.6	12.5
12:57	4.1	122	1.69	14.5	1.62	0.96	59	32.2	33.5	36.1	1.623	1.663	1.6	12.5
12:59	4.1	123	1.68	14.4	1.63	0.97	58	31.9	32.8	33	1.745	1.855	1.6	12.5
13:01	4	123	1.63	13.9	1.55	0.95	55	30.9	32.5	37	1.477	1.596	1.6	12.5
13:03	4.2	123	1.7	14.6	1.65	0.97	58	31.4	32.3	35.3	1.635	1.733	1.6	12.5
13:04	4.1	123	1.69	14.5	1.63	0.96	59	32	33.3	36.6	1.602	1.716	1.6	12.5
13:06	4.1	123	1.68	14.3	1.63	0.97	57	31.8	32.6	32.8	1.743	1.759	1.6	12.5
13:08	4.1	123	1.68	14.4	1.64	0.97	57	31.8	32.8	30.2	1.899	1.954	1.6	12.5
13:11	4	125	1.62	13.8	1.61	0.99	54	31.5	31.7	22.6	2.371	2.673	1.6	12.5
13:12	4.1	125	1.67	14.3	1.6	0.96	56	31	32.3	36.4	1.54	1.582	1.6	12.5
13:14	4.1	125	1.68	14.3	1.62	0.97	55	30.5	31.5	34.1	1.621	1.734	1.6	12.5
13:16	4.2	125	1.73	14.8	1.68	0.97	59	31.4	32.3	36.1	1.619	1.78	1.6	12.5
13:17	4	125	1.64	14.1	1.59	0.97	55	30.9	31.9	33.7	1.627	1.655	1.6	12.5
13:19	4	125	1.65	14.1	1.58	0.96	55	30.9	32.2	36.4	1.523	1.721	1.6	12.5
13:21	4.2	125	1.73	14.8	1.68	0.97	58	31	31.9	36.8	1.577	1.651	1.6	12.5
13:22	4.2	125	1.72	14.7	1.65	0.96	58	31.2	32.5	36.1	1.606	1.657	1.6	12.5
13:24	4.2	125	1.72	14.8	1.67	0.97	59	31.5	32.6	38	1.548	1.697	1.6	12.5
13:26	4.3	125	1.74	14.9	1.69	0.97	59	31.5	32.4	37	1.599	1.633	1.6	12.5
13:27	4.2	125	1.73	14.8	1.7	0.98	59	31.6	32.2	38.7	1.536	1.728	1.6	12.5
13:29	4.4	125	1.8	15.5	1.8	1	64	33	33.2	33.7	1.887	1.954	1.6	12.5
13:31	4.3	125	1.74	14.9	1.74	1	63	33.7	33.6	35.3	1.782	1.91	1.6	12.5
13:32	4.2	125	1.73	14.8	1.74	1	65	34.3	34.2	42.3	1.527	1.698	1.6	12.5
13:34	4.4	125	1.79	15.3	1.82	1.02	66	34.3	33.7	37.5	1.754	1.78	1.6	12.5
13:35	4.2	125	1.71	14.7	1.74	1.02	64	34.8	34.2	40	1.61	1.687	1.6	12.5
13:37	4.3	125	1.74	14.9	1.78	1.02	66	35.4	34.5	39.7	1.667	1.774	1.6	12.5
13:38	4	125	1.65	14.2	1.7	1.03	61	34.3	33.3	35.3	1.725	1.794	1.6	12.5
13:40	4.1	126	1.69	14.5	1.72	1.02	62	34.2	33.6	38	1.64	1.758	1.6	12.5
13:41	4.3	126	1.76	15	1.8	1.02	65	34.4	33.6	42.3	1.55	1.651	1.6	12.5
13:43	4.1	126	1.68	14.4	1.72	1.03	61	33.4	32.6	37.3	1.625	1.678	1.6	12.5
13:45	4.2	126	1.72	14.7	1.78	1.04	60	33.3	32.1	26.8	2.256	2.335	1.6	12.5
13:47	3.9	126	1.59	13.6	1.6	1.01	58	33.7	33.5	34.5	1.673	1.797	1.6	12.5
13:49	4	126	1.64	14.1	1.65	1	58	33	33	35.3	1.656	1.686	1.6	12.5
13:50	4.1	127	1.68	14.4	1.68	1	60	33.3	33.4	37.5	1.611	1.779	1.6	12.5
13:52	4.3	127	1.75	15	1.74	0.99	61	32.2	32.4	38.2	1.599	1.703	1.6	12.5
13:54	4.2	127	1.72	14.8	1.74	1.01	62	33.8	33.5	35.1	1.78	1.852	1.6	12.5
13:55	4.3	127	1.75	15	1.76	1	63	33.5	33.4	37.7	1.673	1.808	1.6	12.5
13:57	4.2	127	1.71	14.6	1.71	1	62	33.5	33.4	39.7	1.558	1.623	1.6	12.5
13:58	4.2	127	1.7	14.6	1.71	1.01	62	33.6	33.4	36.4	1.692	1.775	1.6	12.5
14:00	4.3	127	1.75	15	1.75	1	62	32.9	33	36.8	1.682	1.711	1.6	12.5
14:01	4.4	127	1.78	15.3	1.79	1.01	65	33.8	33.6	40.5	1.605	1.76	1.6	12.5
14:03	4.2	127	1.72	14.7	1.74	1.01	63	34.1	33.6	39.5	1.603	1.719	1.6	12.5
14:04	4.2	127	1.72	14.7	1.73	1.01	61	32.6	32.3	42.6	1.437	1.551	1.6	12.5
14:06	4.3	127	1.77	15.2	1.78	1.01	64	33.1	32.9	41.4	1.538	1.588	1.6	12.5
14:07	4.3	127	1.77	15.2	1.79	1.01	63	32.8	32.5	39	1.61	1.651	1.6	12.5
14:09	4.3	127	1.77	15.2	1.78	1.01	63	33.4	33.1	36.8	1.724	1.809	1.6	12.5
14:10	4.2	129	1.74	14.9	1.74	1	63	33.8	33.6	39.5	1.606	1.754	1.6	12.5
14:12	4.3	129	1.77	15.2	1.8	1.02	65	34	33.4	38.2	1.692	1.82	1.6	12.5
14:14	4.3	129	1.76	15.1	1.78	1.01	65	34.3	33.9	39.7	1.64	1.738	1.6	12.5
14:15	4.4	129	1.78	15.2	1.81	1.02	64	33.5	32.9	37.3	1.719	1.776	1.6	12.5
14:17	4.3	129	1.75	15	1.8	1.03	65	34.6	33.7	38.7	1.683	1.858	1.6	12.5
14:18	4.4	129	1.79	15.3	1.83	1.02	66	34.4	33.7	39.5	1.683	1.787	1.6	12.5
14:20	4.3	129	1.76	15.1	1.82	1.03	65	34.7	33.5	35.3	1.848	1.931	1.6	12.5
14:22	4.1	129	1.66	14.2	1.75	1.05	60	34.3	32.5	23.9	2.499	2.669	1.6	12.5
14:24	4	129	1.65	14.1	1.66	1.01	57	31.9	31.7	35.7	1.597	1.723	1.6	12.5
14:26	4.2	129	1.73	14.8	1.75	1.01	61	32.5	32.1	37.3	1.626	1.814	1.6	12.5
14:27	4.3	129	1.75	14.9	1.75	1	63	33.3	33.2	39	1.611	1.703	1.6	12.5
14:29	4.4	129	1.8	15.4	1.83	1.01	63	32.5	32	37.5	1.679	1.856	1.6	12.5
14:30	4.4	130	1.82	15.5	1.83	1.01	66	33.7	33.5	41.7	1.591	1.68	1.6	12.5
14:32	4.5	130	1.85	15.9	1.89	1.02	68	34.2	33.6	41.4	1.651	1.687	1.6	12.5
14:33	4.3	130	1.77	15.2	1.81	1.02	66	34.6	33.9	37.3	1.767	1.913	1.6	12.5
14:35	4.5	130	1.83	15.7	1.89	1.03	69	35.1	33.9	41.4	1.672	1.767	1.6	15
14:37	4.3	130	1.77	15.2	1.85	1.04	67	35.4	34.1	35.7	1.881	2.018	1.6	15
14:38	4.4	130	1.82	15.6	1.89	1.04	70	35.5	34.2	43.2	1.614	1.746	1.6	15
14:39	4.3	130	1.77	15.1	1.84	1.04	66	34.6	33.1	39	1.689	1.749	1.6	15
14:41	4.4	130	1.81	15.5	1.89	1.04	71	36.4	34.9	40.5	1.742	1.923	1.6	15
14:42	4.3	130	1.77	15.1	1.85	1.05	70	36.8	35.1	42.3	1.659	1.753	1.6	15
14:44	4.2	130	1.7	14.5	1.78	1.05	63	34.9	33.4	33.5	1.889	1.92	1.6	15
14:46	4.4	130	1.79	15.3	1.86	1.04	67	35	33.7	38.5	1.75	1.914	1.6	15
14:47	4.3	130	1.74	14.9	1.8	1.03	65	34.7	33.6	39	1.669	1.722	1.6	15
14:49	4.1	130	1.66	14.2	1.7	1.02	59	33.1	32.4	33.5	1.759	1.789	1.6	15
14:51	4.2	131	1.71	14.7	1.73	1.01	60	32.4	32.2	35.1	1.702	1.849	1.6	15
14:52	4.4	131	1.81	15.5	1.82	1.01	63	32.4	32.2	35.3	1.781	1.865	1.6	15
14:54	4.3	131	1.78	15.2	1.78	1	62	32.3	32.2	37	1.667	1.848	1.6	15
14:56	4.6	131	1.87	16	1.88	1.01	66	33.1	32.9	39	1.706	1.796	1.6	15
14:57	4.5	131	1.84	15.7	1.88	1.02	66	33.5	32.8	35.7	1.841	1.934	1.6	15
14:59	4.5	131	1.84	15.7	1.88	1.02	66	33.7	32.9	30.5	2.154	2.251	1.6	15
15:01	4.3	131	1.76	15	1.77	1.01	63	33.6	33.3	37.7	1.681	1.797	1.6	15
15:02	4.5	131	1.84	15.8	1.88	1.02	67	34	33.2	38.5	1.745	1.944	1.6	15
15:04	4.5	131	1.85	15.8	1.9	1.03	70	35.1	34.2	40	1.739	1.84	1.6	15
15:05	4.4	131	1.81	15.5	1.86	1.03	67	34.4	33.3	37.5	1.775	1.871	1.6	15
15:07	4.4	131	1.8	15.4	1.86	1.03	66	34.2	33.1	37.3	1.773	1.831	1.6	15
15:09	4.4	131	1.79	15.3	1.85	1.03	66	34.7	33.6	37.3	1.784	1.958	1.6	15
15:10	4.5	133	1.84	15.8	1.89	1.03	67	33.7	32.9	38.7	1.724	1.831	1.6	15
15:12	4.5	133	1.83	15.6	1.89	1.04	67	34.1	32.9	38.7	1.726	1.853	1.6	15
15:13	4.5	133	1.85	15.8	1.91	1.03	68	34.2	33.1	38.5	1.763	1.844	1.6	15
15:15	4.5	133	1.82	15.6	1.9	1.04	67	34.5	33	39.2	1.719	1.925	1.6	15
15:16	4.6	133	1.88	16.1	1.96	1.04	71	35.2	33.8	39.7	1.787	1.904	1.6	15
15:18	4.5	133	1.82	15.6	1.93	1.06	67	34.6	32.6	35.3	1.905	2.008	1.6	15
15:20	4.6	134	1.89	16.2	1.98	1.05	71	35.1	33.5	38.7	1.833	1.936	1.6	15
15:21	4.5	134	1.85	15.8	1.98	1.07	72	36.1	33.8	40.8	1.756	1.97	1.6	15
15:23	4.6	134	1.86	15.9	2	1.07	72	36.1	33.6	40.5	1.777	1.866	1.6	15
15:24	4.6	134	1.88	16.1	2.02	1.07	73	36.6	34.1	38.5	1.91	1.983	1.6	15
15:26	4.6	134	1.87	16	2	1.07	73	36.6	34.2	39.2	1.868	2.018	1.6	15
15:27	4.5	134	1.83	15.7	1.96	1.07	71	36.1	33.8	36.4	1.94	2.011	1.6	15
15:29	4.5	134	1.84	15.8	1.97	1.07	71	36.3	33.9	37	1.927	2.08	1.6	15
15:30	4.7	136	1.91	16.3	2.04	1.07	75	36.7	34.2	40.3	1.856	1.937	1.6	15
15:33	4.1	136	1.67	14.3	1.83	1.1	59	33.7	30.7	21.1	2.789	3.098	1.6	15
15:35	4.2	136	1.7	14.6	1.77	1.04	64	34.9	33.5	39.2	1.632	1.808	1.6	15
15:36	4.5	136	1.84	15.8	1.92	1.04	69	34.4	33	45.1	1.523	1.611	1.6	15
15:38	4.7	136	1.93	16.6	2.02	1.05	72	34.7	33.1	40.3	1.784	1.84	1.6	15
15:39	4.7	136	1.9	16.3	1.98	1.04	69	34.1	32.8	38.7	1.795	1.846	1.6	15
15:41	4.4	136	1.8	15.4	1.87	1.04	66	33.8	32.6	44.1	1.498	1.771	1.6	15
15:42	4.6	136	1.88	16.1	1.96	1.04	69	34.3	32.9	40.8	1.702	1.762	1.6	15
15:43	4.7	136	1.91	16.4	2	1.05	72	34.8	33.3	42	1.706	1.83	1.6	15
15:45	4.7	136	1.92	16.4	2.01	1.05	70	34	32.4	42	1.675	1.72	1.6	15
15:46	4.7	136	1.94	16.6	2.05	1.06	73	35.1	33.2	38.2	1.899	2.017	1.6	15
15:48	4.7	136	1.91	16.3	2	1.05	70	34.4	32.8	39.2	1.792	1.927	1.6	15
15:50	4.6	136	1.87	16	1.98	1.06	67	33.6	31.8	37	1.816	1.978	1.6	15
15:51	4.6	136	1.9	16.2	2.01	1.06	70	34.5	32.6	36.8	1.897	1.977	1.6	15
15:53	4.6	136	1.89	16.1	1.99	1.06	73	35.7	33.8	45.1	1.611	1.853	1.6	15
15:55	3.6	137	1.47	12.6	1.53	1.04	44	27.7	26.8	26.2	1.678	1.902	1.6	15
15:56	5.2	137	2.11	18.1	2.16	1.02	72	31.8	31.1	40	1.798	1.909	1.6	15
15:58	4.9	137	2	17.1	2.07	1.04	73	33.9	32.7	40.3	1.802	1.985	1.6	15
15:59	5	137	2.03	17.4	2.13	1.05	75	34.5	32.8	43.5	1.73	1.848	1.6	15
16:01	4.8	137	1.95	16.7	2.08	1.06	75	36.2	34.1	39.7	1.899	1.975	1.6	15
16:02	4.7	137	1.92	16.4	2.04	1.06	72	35.3	33.2	34.7	2.069	2.092	1.6	15
16:05	4.4	137	1.81	15.5	1.96	1.08	65	34.3	31.7	23.6	2.75	2.958	1.6	15
16:07	4.5	137	1.85	15.8	1.99	1.08	66	34.2	31.8	25.2	2.633	2.815	1.6	15
16:09	4.4	137	1.82	15.6	1.89	1.04	65	33.3	32.1	37	1.757	1.953	1.6	15
16:11	4.6	137	1.89	16.2	1.97	1.04	68	33.3	31.9	40.3	1.684	1.828	1.6	15
16:13	4.6	137	1.9	16.2	2.03	1.07	67	33.6	31.3	25.3	2.635	2.694	1.6	15
16:15	4.5	139	1.82	15.6	1.93	1.06	62	32.7	30.8	23.4	2.661	2.905	1.6	15
16:17	4.7	139	1.94	16.6	2	1.03	67	32.5	31.5	35.3	1.903	2.025	1.6	15
16:19	4.7	139	1.92	16.4	1.98	1.03	68	32.9	31.8	40.8	1.665	1.905	1.6	15
16:20	4.9	139	1.99	17.1	2.1	1.05	73	34.4	32.6	39	1.879	1.923	1.6	15
16:22	4.7	139	1.91	16.4	2.01	1.05	71	34.3	32.7	42.9	1.65	1.856	1.6	15
16:23	4.9	139	1.99	17.1	2.12	1.06	74	34.7	32.7	42	1.768	1.904	1.6	15
16:24	4.8	139	1.96	16.8	2.1	1.07	75	35.3	33	45.5	1.646	1.796	1.6	15
16:26	4.8	139	1.94	16.6	2.11	1.09	75	35.9	33.1	47.2	1.596	1.753	1.6	15
16:27	4.5	139	1.82	15.6	1.95	1.07	64	32.6	30.5	40.3	1.593	1.645	1.6	15
16:28	4.7	139	1.91	16.4	2.04	1.07	70	33.8	31.7	44.1	1.587	1.817	1.6	15
16:30	4.9	139	1.99	17	2.12	1.07	75	35.1	32.9	41.4	1.808	1.899	1.6	15
16:30	Recovery
16:31	4.8	141	1.94	16.6	2.07	1.07	72	34.6	32.5	37.7	1.901	1.961	1.6	15
16:33	4.7	141	1.93	16.5	2.06	1.07	71	34.2	32.1	40	1.769	1.97	1.6	15
16:34	4.7	141	1.91	16.3	2.05	1.07	74	35.8	33.4	43.5	1.691	1.836	1.6	0
16:36	4.9	141	2.01	17.2	2.2	1.09	77	36	33	40	1.933	2.136	1.6	0
16:37	5	141	2.03	17.4	2.22	1.09	80	37.2	34.1	39.7	2.023	2.065	1.6	0
16:39	4.7	141	1.93	16.5	2.12	1.1	78	37.9	34.4	39.2	1.986	2.175	1.6	0
16:40	4.8	141	1.98	17	2.21	1.11	80	37.9	34	40.8	1.959	2.109	1.5	0
16:42	4.8	141	1.95	16.7	2.17	1.12	80	38.7	34.6	37.7	2.116	2.224	1.5	0
16:43	4.4	141	1.81	15.5	2.01	1.11	71	36.5	32.9	43.5	1.641	1.78	1.5	0
16:45	4.5	139	1.86	15.9	2.04	1.1	71	35.7	32.5	42.3	1.69	1.811	1.5	0
16:46	4.5	139	1.86	15.9	2.04	1.1	72	36.2	33	42.6	1.701	1.843	1.5	0
16:48	4.7	139	1.91	16.4	2.1	1.1	73	35.8	32.6	40.8	1.796	1.887	1.5	0
16:49	4.6	139	1.86	15.9	2.01	1.08	71	35.7	33.1	40.8	1.748	1.899	1.5	0
16:51	4.6	139	1.87	16	2.05	1.09	72	35.6	32.6	42.3	1.697	1.855	1.5	0
16:52	4.5	139	1.85	15.8	2.03	1.1	73	36.6	33.3	41.4	1.753	1.865	1.5	0
16:53	4.5	139	1.84	15.8	2	1.09	71	36.1	33.2	40	1.782	1.875	1.5	0
16:55	4.4	137	1.8	15.4	1.98	1.1	71	36.6	33.3	39.5	1.792	1.954	1.5	0
16:56	4.4	137	1.79	15.3	1.96	1.1	70	36.1	33	42.9	1.625	1.8	1.5	0
16:58	4.4	137	1.81	15.5	2	1.11	72	37.4	33.7	38.7	1.863	1.859	1.5	0
16:59	4.2	136	1.7	14.6	1.87	1.1	67	36.5	33.2	39.2	1.705	1.817	1.5	0
17:01	4.2	136	1.72	14.7	1.89	1.1	68	36.6	33.2	44.1	1.542	1.791	1.5	0
17:02	4.2	136	1.71	14.6	1.89	1.11	69	37.6	33.9	42.9	1.618	1.687	1.5	0
17:04	4.3	136	1.75	15	1.93	1.1	69	36.3	32.9	44.4	1.551	1.651	1.5	0
17:05	4.1	136	1.69	14.5	1.88	1.11	68	36.7	33	46.2	1.466	1.674	1.5	0
17:06	4.2	136	1.74	14.9	1.94	1.12	69	36.8	32.9	42.6	1.623	1.647	1.5	0
17:08	4.2	136	1.73	14.8	1.93	1.12	69	37.4	33.3	40.5	1.711	1.795	1.5	0
17:09	4	134	1.65	14.1	1.85	1.12	67	37.5	33.4	40.5	1.644	1.765	1.5	0
17:11	4	134	1.64	14	1.83	1.12	64	36	32.3	42	1.526	1.707	1.5	0
17:12	4	134	1.64	14	1.85	1.13	66	37.4	33.2	39.5	1.673	1.797	1.5	0
17:14	4	134	1.62	13.8	1.83	1.13	65	37.7	33.4	36.6	1.788	1.802	1.5	0
17:15	3.9	131	1.59	13.6	1.79	1.13	65	38.2	33.9	38.5	1.698	1.877	1.5	0
17:17	3.9	131	1.6	13.7	1.82	1.14	67	39	34.3	41.1	1.64	1.793	1.5	0
17:18	3.8	131	1.54	13.2	1.76	1.15	64	38.6	33.7	37.5	1.703	1.758	1.5	0
17:20	3.7	131	1.53	13.1	1.77	1.16	68	41	35.4	40.5	1.665	1.903	1.5	0
17:21	3.7	131	1.53	13.1	1.78	1.17	65	39.8	34.2	38.5	1.699	1.7	1.5	0
17:23	3.7	131	1.51	12.9	1.78	1.18	69	42.2	35.9	39.5	1.737	1.881	1.5	0
17:25	3.7	130	1.5	12.8	1.77	1.18	68	42.1	35.5	39	1.738	1.887	1.5	0
17:26	3.6	130	1.49	12.7	1.77	1.19	68	42.5	35.6	41.4	1.648	1.77	1.5	0
17:27	3.6	130	1.49	12.7	1.77	1.19	69	43.2	36.2	40.5	1.705	1.793	1.5	0
17:29	3.6	130	1.47	12.6	1.75	1.19	69	43.3	36.3	42.9	1.604	1.758	1.5	0
17:30	3.5	131	1.43	12.2	1.73	1.21	66	42.9	35.5	40.8	1.623	1.665	1.5	0
17:32	3.5	131	1.43	12.3	1.73	1.21	66	42.7	35.4	40.3	1.639	1.737	1.5	0
17:33	3.4	131	1.41	12	1.7	1.2	64	41.9	34.8	42.3	1.516	1.628	1.5	0
17:35	3.4	131	1.37	11.7	1.65	1.2	63	42.6	35.4	42.3	1.502	1.612	1.5	0
17:36	3.4	131	1.4	12	1.69	1.21	66	43.5	36.1	43.2	1.534	1.663	1.5	0
17:38	3.4	131	1.38	11.8	1.67	1.21	66	44	36.3	40.8	1.605	1.747	1.5	0
17:53		126								3.8	0	0	1.5	0
18:09		121								3.8	0	0	1.3	0
18:25		115								3.8	0	0	1.3	0
18:40		114								3.8	0	0	1.3	0
18:56		112								3.8	0	0	1.3	0
19:12		110								3.8	0	0	1.3	0
19:28		108								3.8	0	0	1.3	0
19:43		107								3.8	0	0	1.3	0
19:59		104								3.8	0	0	1.3	0
20:15		103								3.8	0	0	1.3	0
