# Supplementary material for: On the development of diagnostic support algorithms based on CPET biosignals data via machine learning and wavelets
Source: PeerJ journal article supplement (doi:10.7717/peerj-cs.2474), 2025-01-30
Supplement: raw_data.zip [file Subject25_BxB.xlsx]

## Sheet: Demographics
Gender:	female
Age:	60
Height (cm):	160
Weight (kg):	82.1
BMI:	32
Condition:	Metabolic Syndrome

## Sheet: Subject25_BxB
Time	METS		HR		V'O2		V'CO2		RER		V'E		VTex		VTin
min			1/min		L/min		L/min				L/min		L		L
00:00	Rest
00:04	2.6				0.75		0.81		1.08
00:08	0.6		58		0.18		0.19		1.06		7		0.554		1.098
00:14	1.3		58		0.39		0.42		1.09		13		1.184		1.18
00:17	0.1		57		0.03		0.03		0.95		3		0.145		0.264
00:24	0.8		57		0.24		0.22		0.94		7		0.724		0.564
00:27	0		56		0.01		0		0.6		3		0.152		0.587
00:33	1.5		57		0.45		0.4		0.89		12		1.221		1.016
00:38	1.3		60		0.36		0.33		0.91		10		0.869		0.92
00:43	1.3		60		0.37		0.33		0.9		10		0.728		0.695
00:43
00:46	1.6		61		0.46		0.43		0.93		13		0.768		0.791
00:49	1.4		61		0.41		0.38		0.91		12		0.611		0.686
00:52	1.7		60		0.48		0.44		0.92		14		0.68		0.731
00:55	2		61		0.58		0.53		0.91		16		0.719		0.766
00:57	2.2		61		0.62		0.58		0.93		18		0.778		0.826
01:00	2		63		0.58		0.54		0.94		17		0.731		0.772
01:02	2.1		63		0.61		0.57		0.94		18		0.755		0.767
01:05	2.1		66		0.6		0.57		0.95		18		0.745		0.802
01:08	1.6		66		0.47		0.44		0.94		15		0.689		0.762
01:10	2.3		69		0.66		0.64		0.98		19		0.858		0.894
01:13	1.8		69		0.52		0.51		0.98		16		0.703		0.763
01:16	2.2		71		0.64		0.66		1.03		20		0.824		0.856
01:17	1.6		71		0.46		0.45		0.98		16		0.464		0.458
01:20	2.1		71		0.6		0.61		1.01		18		0.739		0.765
01:22	2.1		73		0.6		0.62		1.04		19		0.83		0.849
01:27	2.3		73		0.67		0.78		1.16		24		1.863		1.948
01:29	1.7		73		0.48		0.51		1.07		16		0.67		0.684
01:32	1.9		73		0.54		0.55		1.02		17		0.711		0.751
01:34	2		73		0.56		0.55		0.98		17		0.708		0.78
01:37	2		73		0.58		0.56		0.96		17		0.701		0.81
01:39	2		73		0.56		0.5		0.9		16		0.583		0.676
01:42	2.3		73		0.67		0.6		0.89		18		0.717		0.803
01:42	Test
01:44	2.3		73		0.65		0.56		0.87		17		0.801		0.792
01:47	2.5		73		0.72		0.63		0.87		19		0.776		0.785
01:50	1.9		72		0.55		0.48		0.87		15		0.7		0.814
01:53	1.7		72		0.48		0.42		0.88		13		0.687		0.851
01:55	2.8		71		0.8		0.7		0.87		21		0.815		0.732
01:58	2.1		71		0.6		0.53		0.88		16		0.672		0.74
02:00	2.5		69		0.71		0.64		0.91		19		0.85		0.954
02:03	2.2		69		0.64		0.62		0.96		20		0.852		0.973
02:07	2		68		0.58		0.54		0.93		15		1.077		0.907
02:11	2.8		68		0.82		0.73		0.89		20		1.16		1.281
02:13	2.8		68		0.79		0.7		0.88		21		0.907		0.957
02:16	2.8		69		0.81		0.72		0.88		21		0.91		0.971
02:18	3.2		69		0.92		0.83		0.9		25		1.037		1.097
02:23	2.3		69		0.67		0.64		0.95		16		1.167		1.429
02:25	2.9		70		0.84		0.78		0.93		23		0.965		0.956
02:27	2.6		70		0.75		0.68		0.9		20		0.774		0.803
02:30	2.6		71		0.76		0.68		0.89		20		0.819		0.811
02:32	2.7		71		0.77		0.69		0.89		20		0.786		0.879
02:35	3		71		0.86		0.79		0.92		23		1.026		1.106
02:37	2.5		71		0.72		0.65		0.9		20		0.711		0.784
02:39	2.5		73		0.71		0.62		0.88		18		0.722		0.752
02:42	2.6		73		0.74		0.64		0.87		19		0.788		0.855
02:44	2.9		74		0.83		0.72		0.86		21		0.846		0.88
02:46	2.9		74		0.83		0.72		0.86		22		0.809		0.877
02:49	3.9		74		1.12		1.06		0.94		32		1.514		1.494
02:52	2.6		74		0.75		0.71		0.95		22		0.858		0.966
02:54	2.6		74		0.76		0.69		0.91		22		0.779		0.829
02:56	2.9		74		0.82		0.73		0.89		22		0.806		0.792
02:58	2.9		74		0.83		0.72		0.87		21		0.797		0.843
03:00	3		74		0.86		0.75		0.87		24		0.758		0.852
03:03	3.7		74		1.07		1		0.93		29		1.311		1.308
03:05	3.3		73		0.95		0.89		0.93		28		1.062		1.047
03:07	2.7		73		0.76		0.7		0.92		23		0.77		0.876
03:09	3.1		73		0.88		0.8		0.91		24		0.859		0.863
03:11	3.1		74		0.88		0.79		0.89		23		0.82		0.87
03:14	3.1		74		0.9		0.82		0.91		24		1.113		1.177
03:17	3		75		0.85		0.77		0.91		23		1.02		1.117
03:19	3.2		75		0.91		0.78		0.86		23		0.775		0.806
03:21	3.3		76		0.96		0.83		0.86		24		0.853		0.914
03:23	3.3		76		0.96		0.83		0.87		25		0.827		0.912
03:26	4		77		1.14		1.04		0.91		31		1.224		1.264
03:28	3.4		77		0.98		0.89		0.92		28		0.92		0.966
03:30	3.4		77		0.97		0.9		0.93		27		0.997		1.039
03:32	3		77		0.85		0.79		0.93		24		0.98		1.033
03:34	2.9		77		0.84		0.74		0.88		22		0.709		0.76
03:37	3.9		77		1.13		1.06		0.94		33		1.386		1.4
03:39	3.5		77		1		0.92		0.92		27		0.977		0.957
03:41	3.3		78		0.94		0.87		0.92		27		0.944		1.013
03:43	3.3		78		0.95		0.88		0.93		27		0.975		0.957
03:45	3.4		78		0.96		0.9		0.93		28		0.979		1.012
03:47	3.3		78		0.96		0.9		0.93		28		0.961		0.98
03:49	3.2		78		0.92		0.85		0.92		26		0.845		0.883
03:52	2.8		78		0.8		0.73		0.91		22		0.846		0.914
03:54	3.3		77		0.95		0.86		0.9		25		0.9		0.948
03:56	3		77		0.87		0.78		0.91		23		0.909		0.96
03:58	3.1		77		0.9		0.78		0.87		22		0.844		0.864
04:01	3.2		77		0.91		0.81		0.89		22		0.956		1.099
04:03	3.9		77		1.13		1		0.88		29		1.038		1.031
04:06	3.8		77		1.1		1.08		0.98		35		1.664		1.852
04:10	1.8		77		0.53		0.47		0.88		14		1.045		1.007
04:12	4.2		77		1.22		1		0.82		28		0.876		0.868
04:14	4.1		77		1.19		1		0.84		30		0.884		0.912
04:16	4.2		77		1.2		1.07		0.89		33		1.024		1.153
04:18	4		77		1.14		1.07		0.93		35		0.973		1.033
04:20	3.3		77		0.96		0.93		0.98		28		1.213		1.175
04:22	3.3		76		0.94		0.91		0.97		28		0.938		0.991
04:24	3.3		76		0.96		0.91		0.95		28		0.924		0.935
04:26	3.1		76		0.88		0.85		0.96		26		0.812		0.945
04:28	2.2		76		0.62		0.57		0.91		17		0.636		0.698
04:31	3		76		0.87		0.77		0.89		22		0.889		0.91
04:33	3.7		76		1.06		0.91		0.86		26		0.846		0.845
04:35	3.6		76		1.05		0.92		0.88		27		0.859		0.963
04:39	3.4		76		0.96		0.91		0.94		28		1.985		1.733
04:41	3.4		77		0.96		0.83		0.86		23		0.899		1.004
04:43	4.1		77		1.18		1.03		0.88		30		1.017		1.036
04:45	3.9		77		1.11		1.01		0.91		31		1.009		1.059
04:47	3.7		78		1.07		1		0.93		30		1.017		1.038
04:49	3.7		78		1.07		1.01		0.94		30		0.987		1.011
04:51	3.5		78		1.01		0.97		0.97		30		1.037		1.09
04:53	3.4		80		0.97		0.93		0.96		29		0.91		0.946
04:57	1.9		80		0.56		0.53		0.95		16		0.884		0.926
04:59	3.9		80		1.11		0.93		0.84		24		1.103		1.04
05:02	2.9		80		0.84		0.72		0.85		21		0.954		0.993
05:04	4.7		80		1.36		1.21		0.89		35		1.251		1.273
05:07	3.3		80		0.96		0.89		0.93		26		1.09		1.162
05:09	3.7		79		1.05		0.99		0.94		29		1.096		1.117
05:11	3.4		78		0.99		0.94		0.95		28		1.062		1.075
05:14	3.5		78		1.01		1		1		30		1.318		1.358
05:16	3.3		78		0.94		0.92		0.98		28		0.983		1.027
05:18	3.1		78		0.89		0.87		0.98		26		0.953		1.031
05:20	3.3		78		0.96		0.92		0.96		27		1.01		0.983
05:22	3.2		78		0.91		0.87		0.95		26		0.9		0.998
05:25	3.4		78		0.98		0.93		0.95		27		1.043		1.038
05:27	3.8		78		1.09		1.06		0.98		32		1.223		1.233
05:29	3.2		78		0.92		0.89		0.96		27		0.931		0.999
05:31	3.2		78		0.91		0.89		0.97		27		1.003		1.027
05:33	3.2		78		0.92		0.88		0.96		26		0.948		0.977
05:35	3.3		78		0.95		0.89		0.94		26		0.881		0.953
05:37	3.3		78		0.95		0.87		0.92		25		0.793		0.848
05:40	3.6		80		1.02		0.96		0.94		27		0.971		1.045
05:42	3.6		80		1.02		0.96		0.94		28		0.991		1
05:44	3.4		80		0.98		0.94		0.96		28		1.028		1.079
05:48	3.3		80		0.94		0.98		1.04		29		1.904		1.928
05:50	2.5		80		0.73		0.68		0.93		19		0.843		0.981
05:53	3.3		80		0.96		0.86		0.9		24		0.827		0.79
05:54	3.3		80		0.94		0.84		0.89		25		0.801		0.869
05:56	3.3		79		0.95		0.85		0.89		25		0.808		0.828
05:59	3.5		79		1		0.9		0.9		26		0.949		0.966
06:00	4.1		79		1.19		1.09		0.92		34		1.036		1.052
06:02	3.6		78		1.03		0.98		0.95		30		0.931		0.976
06:04	3.5		78		1.01		0.98		0.97		30		0.965		0.989
06:06	3.5		78		0.99		0.98		0.99		31		0.976		1.006
06:08	3.2		77		0.92		0.93		1.01		30		0.997		1.036
06:10	3.5		77		1.02		1		0.99		32		0.845		0.932
06:12	3.1		77		0.89		0.88		0.99		26		0.962		1.016
06:14	3.8		77		1.08		1.1		1.02		34		1.41		1.498
06:16	3.5		77		0.99		1		1		32		1.002		0.916
06:18	3.1		79		0.89		0.87		0.97		26		0.844		0.895
06:20	3.4		79		0.97		0.93		0.96		28		0.981		0.944
06:22	3.2		81		0.92		0.85		0.92		25		0.799		0.895
06:24	2.6		81		0.75		0.72		0.96		24		0.632		1.163
06:27	3.2		81		0.91		0.85		0.93		22		1.268		0.768
06:29	4.3		81		1.25		1.08		0.87		33		0.969		1.04
06:31	4.3		81		1.23		1.1		0.9		33		0.993		1.037
06:33	3.8		81		1.09		1.02		0.94		31		1.094		1.094
06:35	3.4		81		0.98		0.94		0.96		31		1.051		1.122
06:37	3.5		81		1		0.96		0.96		30		0.964		0.992
06:39	3.4		82		0.97		0.92		0.95		27		0.959		1.014
06:41	3.7		82		1.07		1.03		0.96		32		1.136		1.158
06:43	3.6		82		1.03		0.99		0.96		30		1.045		1.036
06:45	3.6		82		1.03		0.99		0.95		30		1.011		1.063
06:47	3.4		82		0.98		0.92		0.95		28		0.909		0.97
06:49	3.7		81		1.06		1		0.94		30		1.009		1.062
06:51	3.9		81		1.12		1.05		0.94		31		1.027		1.036
06:53	3.8		82		1.09		1.03		0.94		30		1.046		1.069
06:55	3.3		82		0.94		0.86		0.91		25		0.795		0.888
06:58	3.4		82		0.99		0.92		0.93		27		1.09		1.18
07:00	4.2		82		1.22		1.15		0.95		34		1.339		1.347
07:02	3.4		83		0.99		0.92		0.93		27		0.912		0.939
07:04	3.4		83		0.98		0.88		0.9		24		0.853		0.953
07:06	4.4		83		1.27		1.14		0.9		33		0.998		1.024
07:08	4.2		83		1.21		1.12		0.93		34		1.077		1.09
07:10	4		83		1.15		1.08		0.94		33		0.985		1.082
07:12	2.1		85		0.6		0.55		0.91		16		0.753		0.887
07:14	4.5		85		1.29		1.16		0.89		32		1.165		1.116
07:17	4.6		85		1.33		1.23		0.92		36		1.265		1.273
07:19	4.2		85		1.2		1.14		0.95		34		1.089		1.197
07:20	4.3		85		1.22		1.18		0.97		35		1.145		1.167
07:22	3.8		85		1.1		1.08		0.97		32		1.07		1.18
07:25	3.9		85		1.12		1.1		0.98		32		1.115		1.157
07:27	3.7		85		1.06		1.03		0.97		31		1.04		1.116
07:29	4.4		86		1.25		1.27		1.01		38		1.529		1.642
07:31	3.2		86		0.91		0.94		1.03		32		0.84		1.119
07:33	2.3		86		0.66		0.65		0.98		20		0.716		0.768
07:34	5		86		1.44		1.36		0.94		39		1.056		0.985
07:37	3.5		86		0.99		0.93		0.93		25		1.201		1.148
07:39	4.2		86		1.2		1.1		0.92		30		1.104		1.166
07:41	4.3		86		1.22		1.13		0.92		32		1.069		1.141
07:43	4.2		86		1.2		1.12		0.93		33		1.104		1.13
07:45	4.2		86		1.19		1.15		0.96		35		1.105		1.138
07:47	4		86		1.15		1.12		0.98		35		1.104		1.146
07:49	4		86		1.16		1.14		0.99		35		1.087		1.12
07:51	3.9		86		1.11		1.11		1		34		1.061		1.144
07:53	4.1		86		1.18		1.18		1		35		1.106		1.131
07:55	4		86		1.14		1.14		1		34		1.085		1.14
07:58	3.9		88		1.13		1.19		1.05		35		1.827		1.849
08:00	3.7		88		1.06		1.02		0.96		30		0.971		1.001
08:02	3.6		89		1.03		0.96		0.94		28		0.921		0.948
08:04	4		89		1.15		1.08		0.94		31		0.951		1.062
08:06	4.8		89		1.39		1.36		0.98		40		1.391		1.419
08:08	3.9		90		1.13		1.13		1		35		1.088		1.108
08:09	3.8		90		1.1		1.09		1		33		0.992		1.045
08:11	4.3		90		1.23		1.25		1.01		37		1.208		1.212
08:13	3.9		89		1.13		1.14		1.01		34		1.087		1.121
08:16	2.7		89		0.77		0.76		0.99		23		0.927		1.041
08:18	3.8		88		1.09		1.02		0.94		28		1.111		0.995
08:20	2.7		88		0.78		0.7		0.9		21		0.707		0.973
08:22	5.3		88		1.52		1.4		0.92		40		1.425		1.304
08:24	4.6		88		1.32		1.24		0.94		36		1.107		1.176
08:26	4.4		88		1.26		1.2		0.95		36		1.092		1.121
08:28	4.3		88		1.23		1.19		0.96		37		1.109		1.157
08:30	4.3		89		1.24		1.23		0.99		39		1.29		1.319
08:31	4.1		89		1.19		1.18		0.99		36		1.053		1.095
08:33	4.3		89		1.25		1.26		1.01		39		1.375		1.412
08:35	3.9		90		1.12		1.11		1		35		1.044		1.06
08:37	4		90		1.16		1.13		0.97		34		1.026		0.983
08:39	4		90		1.15		1.12		0.97		34		1.074		1.143
08:41	4.2		90		1.22		1.16		0.95		34		1.022		1.093
08:43	4.4		90		1.28		1.22		0.96		36		1.057		1.137
08:45	4.7		90		1.35		1.34		0.99		39		1.477		1.506
08:47	4.2		91		1.19		1.15		0.97		34		1.044		1.087
08:50	3.8		91		1.1		1.14		1.03		33		1.992		2.022
08:52	3.7		92		1.07		0.98		0.92		29		0.908		1.04
08:55	2.4		92		0.68		0.62		0.91		19		0.905		0.928
08:57	6.2		93		1.78		1.47		0.83		40		1.088		1.002
08:58	5.2		93		1.5		1.31		0.87		39		1.136		1.209
09:00	5.3		93		1.52		1.36		0.9		40		1.22		1.152
09:02	5		93		1.42		1.33		0.93		40		1.203		1.257
09:04	4.6		93		1.34		1.27		0.95		40		1.137		1.152
09:06	4.5		93		1.31		1.27		0.97		39		1.136		1.165
09:07	4.2		93		1.22		1.19		0.98		36		1.03		1.114
09:09	4.5		93		1.29		1.26		0.97		38		1.078		1.148
09:11	4.5		94		1.29		1.27		0.99		38		1.1		1.181
09:12	4.5		94		1.28		1.25		0.98		37		1.042		1.108
09:14	4.5		94		1.3		1.27		0.98		38		1.105		1.147
09:16	4.4		94		1.26		1.23		0.98		37		1.115		1.15
09:18	4.4		94		1.27		1.24		0.98		36		1.06		1.165
09:20	4.6		94		1.31		1.29		0.98		38		1.184		1.144
09:22	4.7		94		1.35		1.36		1.01		40		1.591		1.668
09:24	4.2		94		1.21		1.19		0.98		35		1.059		1.116
09:26	4.4		94		1.26		1.21		0.96		35		1.043		1.061
09:27	4.5		94		1.29		1.24		0.96		36		1.016		1.12
09:29	4.5		94		1.3		1.25		0.96		36		1.02		1.102
09:31	4.6		94		1.32		1.26		0.96		36		1.052		1.082
09:32	4.6		94		1.32		1.26		0.96		37		1.053		1.137
09:34	4.6		94		1.32		1.28		0.97		39		1.069		1.133
09:36	4		93		1.16		1.12		0.97		30		1.078		1.198
09:38	4.7		93		1.36		1.32		0.97		38		1.254		1.213
09:40	4.3		94		1.23		1.18		0.95		33		1.1		1.141
09:42	4.5		94		1.28		1.21		0.94		35		1.013		1.112
09:44	5		94		1.44		1.41		0.98		41		1.456		1.542
09:46	4.4		94		1.28		1.25		0.98		37		1.093		1.163
09:48	4.5		94		1.3		1.27		0.98		36		1.109		1.115
09:50	4.7		94		1.35		1.33		0.99		39		1.243		1.269
09:51	4.6		94		1.32		1.3		0.98		37		1.077		1.181
09:53	4.4		94		1.27		1.27		0.99		37		1.124		1.187
09:55	4.8		94		1.37		1.38		1.01		41		1.41		1.451
09:57	4.3		94		1.24		1.24		1		37		1.099		1.142
09:59	4.3		94		1.23		1.23		1		35		1.03		1.101
10:01	4.6		94		1.32		1.32		1		38		1.172		1.236
10:02	4.5		94		1.31		1.29		0.99		38		1.102		1.177
10:04	4.8		95		1.39		1.42		1.02		42		1.361		1.411
10:06	4.7		95		1.35		1.37		1.01		41		1.234		1.245
10:08	4.8		95		1.37		1.4		1.03		42		1.246		1.33
10:10	4.4		96		1.26		1.27		1		39		1.169		1.173
10:11	4.4		96		1.26		1.26		1		36		1.068		1.172
10:14	4.9		96		1.42		1.47		1.03		43		1.633		1.737
10:15	4.6		98		1.31		1.3		1		39		1.111		1.143
10:17	4.5		98		1.3		1.28		0.99		38		1.07		1.176
10:19	4.9		98		1.41		1.39		0.99		41		1.226		1.248
10:21	4.8		100		1.39		1.38		1		41		1.293		1.374
10:23	4.8		100		1.39		1.43		1.02		41		1.535		1.648
10:25	4.7		101		1.35		1.36		1.01		41		1.251		1.27
10:27	4.4		101		1.27		1.22		0.96		34		1.119		1.202
10:29	4.8		101		1.38		1.35		0.98		41		1.383		1.433
10:31	4.8		103		1.39		1.36		0.98		40		1.276		1.317
10:33	5		103		1.45		1.42		0.98		41		1.211		1.302
10:34	5		103		1.44		1.43		0.99		42		1.304		1.382
10:36	4.8		103		1.38		1.35		0.98		40		1.119		1.191
10:38	5.1		103		1.47		1.47		1		43		1.382		1.436
10:40	5		104		1.43		1.43		0.99		43		1.225		1.297
10:41	4.6		104		1.32		1.31		0.99		40		1.127		1.24
10:43	4.9		104		1.4		1.38		0.99		41		1.199		1.237
10:45	4.9		105		1.41		1.42		1.01		42		1.288		1.403
10:47	4.9		105		1.41		1.38		0.98		40		1.159		1.176
10:49	4.9		105		1.4		1.38		0.99		40		1.162		1.232
10:50	5.2		104		1.49		1.45		0.97		43		1.172		1.21
10:52	5.2		104		1.49		1.51		1.01		45		1.244		1.501
10:54	3.8		103		1.08		1.01		0.94		23		1.001		1.01
10:56	5.6		103		1.62		1.52		0.94		41		1.179		1.271
10:58	5.6		103		1.6		1.55		0.96		44		1.301		1.367
11:00	5.6		102		1.6		1.55		0.97		45		1.257		1.299
11:01	5.2		102		1.5		1.48		0.98		43		1.211		1.296
11:03	5.3		102		1.53		1.52		0.99		44		1.234		1.27
11:05	5.3		103		1.52		1.51		0.99		44		1.226		1.291
11:07	4.8		103		1.39		1.46		1.05		43		1.732		2.005
11:09	3.5		103		1.01		0.95		0.94		26		0.728		0.786
11:10	5.8		104		1.66		1.55		0.93		42		1.136		1.11
11:12	5.6		104		1.62		1.52		0.94		43		1.169		1.19
11:14	5.7		104		1.63		1.54		0.95		43		1.185		1.236
11:15	5.4		106		1.56		1.52		0.97		44		1.237		1.328
11:17	5.4		106		1.56		1.52		0.97		43		1.182		1.284
11:19	5.4		106		1.55		1.55		1		45		1.243		1.345
11:20	5.8		106		1.67		1.67		1		49		1.258		1.308
11:22	5.2		106		1.48		1.5		1.01		44		1.129		1.246
11:23	5.6		106		1.62		1.63		1.01		47		1.203		1.257
11:25	5.3		107		1.51		1.55		1.03		45		1.188		1.285
11:26	5.4		107		1.54		1.58		1.02		46		1.247		1.286
11:28	5.5		107		1.59		1.63		1.03		48		1.215		1.282
11:30	4.7		107		1.36		1.39		1.02		37		1.149		1.274
11:31	5.4		108		1.56		1.55		0.99		45		1.135		1.177
11:33	5		108		1.45		1.46		1.01		42		1.097		1.201
11:34	5.5		108		1.59		1.6		1.01		48		1.247		1.315
11:36	5.6		108		1.61		1.64		1.01		48		1.244		1.259
11:38	5.7		108		1.65		1.71		1.04		49		1.404		1.477
11:39	5.4		108		1.54		1.61		1.05		47		1.353		1.433
11:41	5.3		109		1.52		1.55		1.03		45		1.218		1.319
11:43	5.3		109		1.51		1.56		1.03		44		1.237		1.358
11:44	5.7		109		1.65		1.69		1.03		49		1.313		1.399
11:46	5.6		109		1.6		1.65		1.03		48		1.278		1.333
11:48	5.5		109		1.59		1.69		1.07		51		1.602		1.712
11:50	4.5		110		1.29		1.32		1.02		37		1.23		1.316
11:52	5.4		110		1.54		1.56		1.01		45		1.239		1.3
11:53	5.3		110		1.53		1.54		1.01		45		1.198		1.294
11:55	5.5		111		1.58		1.6		1.01		47		1.234		1.314
11:56	5.7		111		1.65		1.7		1.03		49		1.344		1.363
11:58	5.4		111		1.56		1.62		1.04		47		1.316		1.426
12:00	5.6		111		1.61		1.7		1.05		50		1.356		1.433
12:01	5.4		111		1.57		1.64		1.05		49		1.221		1.298
12:03	5.4		111		1.56		1.62		1.04		47		1.225		1.307
12:04	5.3		111		1.53		1.6		1.05		47		1.245		1.369
12:06	5.6		111		1.61		1.68		1.04		50		1.314		1.323
12:08	5.5		111		1.59		1.71		1.07		51		1.613		1.73
12:09	5.2		112		1.49		1.55		1.04		45		1.22		1.294
12:11	5.1		112		1.47		1.54		1.05		45		1.249		1.339
12:13	5.4		112		1.55		1.58		1.02		45		1.236		1.285
12:15	5.7		112		1.64		1.73		1.05		52		1.61		1.737
12:17	4.7		114		1.36		1.39		1.02		38		1.202		1.308
12:18	5.7		114		1.64		1.67		1.01		49		1.306		1.339
12:20	5.7		115		1.63		1.7		1.04		49		1.682		1.73
12:22	5.4		115		1.54		1.61		1.05		48		1.465		1.544
12:24	5.2		115		1.48		1.53		1.03		43		1.382		1.473
12:26	5.5		116		1.58		1.64		1.04		48		1.431		1.528
12:28	5.3		116		1.54		1.59		1.04		45		1.443		1.557
12:29	5.8		116		1.68		1.7		1.01		50		1.278		1.333
12:31	5.6		116		1.61		1.64		1.02		50		1.2		1.273
12:32	5.6		116		1.62		1.67		1.03		50		1.306		1.36
12:35	5.3		115		1.51		1.63		1.07		46		1.918		2.085
12:36	4.8		115		1.38		1.35		0.98		39		1.111		1.16
12:38	5.4		115		1.54		1.51		0.98		44		1.192		1.228
12:40	5.9		116		1.69		1.65		0.98		47		1.301		1.316
12:41	5.7		116		1.64		1.6		0.97		46		1.227		1.307
12:43	5.9		116		1.7		1.68		0.99		47		1.336		1.351
12:45	5.9		115		1.69		1.72		1.02		51		1.423		1.591
12:47	5.2		115		1.49		1.5		1.01		43		1.338		1.38
12:48	5.8		115		1.66		1.65		0.99		49		1.331		1.37
12:50	6.1		115		1.76		1.78		1.01		52		1.372		1.413
12:51	6		115		1.71		1.75		1.02		52		1.296		1.403
12:53	6.3		115		1.8		1.87		1.04		54		1.464		1.479
12:55	5.7		115		1.63		1.72		1.05		51		1.461		1.543
12:56	5.5		116		1.59		1.68		1.05		49		1.426		1.476
12:58	5.7		116		1.63		1.71		1.05		49		1.518		1.58
13:00	5.7		118		1.64		1.71		1.04		48		1.558		1.645
13:02	5.8		118		1.68		1.73		1.03		49		1.411		1.491
13:03	6		118		1.72		1.77		1.03		51		1.363		1.421
13:05	6.1		120		1.76		1.81		1.03		53		1.416		1.46
13:07	6.3		120		1.8		1.9		1.05		57		1.437		1.478
13:08	5.9		120		1.69		1.78		1.05		54		1.298		1.436
13:10	6.1		121		1.74		1.87		1.07		56		1.542		1.614
13:11	5.8		121		1.68		1.79		1.07		54		1.369		1.453
13:13	5.9		121		1.71		1.82		1.06		54		1.402		1.419
13:14	5.9		122		1.69		1.83		1.08		54		1.606		1.715
13:16	5.8		122		1.67		1.78		1.07		54		1.368		1.417
13:17	6.1		122		1.75		1.86		1.06		55		1.405		1.396
13:19	5.8		122		1.67		1.76		1.05		53		1.294		1.424
13:20	6.2		123		1.78		1.88		1.06		55		1.304		1.344
13:22	6		123		1.73		1.85		1.07		53		1.404		1.459
13:23	5.8		123		1.67		1.78		1.07		54		1.381		1.494
13:25	6		123		1.73		1.84		1.07		55		1.379		1.442
13:27	6.2		123		1.8		1.93		1.08		57		1.442		1.448
13:28	6		123		1.73		1.87		1.08		55		1.351		1.433
13:30	5.9		123		1.69		1.8		1.07		53		1.409		1.468
13:32	5.9		123		1.7		1.88		1.1		53		1.949		2.06
13:34	5.2		123		1.49		1.55		1.04		43		1.37		1.493
13:35	6		123		1.71		1.76		1.03		51		1.302		1.445
13:37	6.1		123		1.76		1.81		1.03		53		1.338		1.362
13:38	6		123		1.73		1.8		1.04		54		1.35		1.48
13:40	6.5		123		1.87		1.97		1.05		59		1.431		1.487
13:41	6.2		123		1.79		1.9		1.06		56		1.402		1.447
13:43	5.6		123		1.61		1.74		1.08		52		1.273		1.554
13:44	6.5		123		1.85		1.97		1.06		62		1.279		1.28
13:46	3.9		123		1.11		1.06		0.96		23		0.831		0.853
13:48	6.6		123		1.88		1.81		0.96		45		1.237		1.36
13:49	7.1		123		2.04		2.06		1.01		57		1.53		1.595
13:51	6.9		123		1.98		2.03		1.02		60		1.471		1.525
13:52	6.4		123		1.85		1.97		1.07		57		1.471		1.613
13:54	6.4		123		1.84		1.96		1.06		58		1.39		1.479
13:55	6.2		123		1.79		1.94		1.09		58		1.404		1.476
13:57	6.2		123		1.78		1.94		1.09		59		1.397		1.519
13:58	6.3		123		1.81		1.97		1.09		59		1.483		1.524
14:00	6.1		125		1.75		1.89		1.08		57		1.382		1.485
14:01	6.2		125		1.8		1.96		1.09		59		1.412		1.492
14:03	6.3		125		1.8		1.99		1.11		58		1.516		1.647
14:04	6.3		126		1.8		1.97		1.09		57		1.416		1.436
14:06	6.1		126		1.75		1.95		1.11		59		1.629		1.732
14:08	5.6		126		1.6		1.8		1.12		50		1.945		2.132
14:10	6.2		126		1.79		1.9		1.06		56		1.31		1.292
14:11	6.4		127		1.83		1.96		1.07		58		1.327		1.424
14:12	6.6		127		1.9		2.03		1.07		60		1.416		1.464
14:14	6.3		127		1.82		1.97		1.08		59		1.38		1.463
14:15	6.2		129		1.79		1.94		1.08		58		1.447		1.549
14:17	6.6		129		1.89		2.06		1.09		61		1.553		1.564
14:18	6.4		129		1.85		2.02		1.09		61		1.505		1.532
14:20	6.4		130		1.83		1.99		1.09		60		1.42		1.544
14:21	6.4		130		1.84		2.02		1.1		61		1.406		1.443
14:22	6.3		130		1.81		1.97		1.09		57		1.319		1.412
14:24	6.6		123		1.9		2.09		1.1		64		1.413		1.507
14:25	5.3		123		1.54		1.68		1.09		50		1.113		1.252
14:27	6.4		123		1.84		1.97		1.07		54		1.246		1.267
14:28	5.8		123		1.67		1.75		1.05		48		1.416		1.494
14:30	7		123		2.01		2.14		1.07		62		1.398		1.511
14:31	6		131		1.74		1.85		1.06		49		1.343		1.44
14:33	6.7		131		1.92		2.1		1.09		60		1.633		1.723
14:34	6.6		130		1.91		2.06		1.08		62		1.399		1.52
14:36	6.8		130		1.95		2.15		1.1		64		1.447		1.506
14:37	6.8		130		1.95		2.16		1.11		64		1.457		1.553
14:39	6.4		130		1.85		2.08		1.13		63		1.762		1.841
14:40	6.4		131		1.84		2.05		1.11		61		1.446		1.562
14:42	6.4		131		1.85		2.07		1.12		62		1.52		1.569
14:43	6.6		131		1.89		2.09		1.11		60		1.629		1.706
14:45	6.3		133		1.8		2		1.11		58		1.58		1.71
14:46	6.6		133		1.91		2.12		1.11		64		1.477		1.581
14:48	6.8		133		1.96		2.18		1.11		64		1.523		1.561
14:49	6.7		133		1.92		2.14		1.12		65		1.494		1.573
14:51	6.3		134		1.82		2.04		1.12		57		1.83		1.935
14:52	6.5		134		1.86		2.03		1.09		58		1.344		1.445
14:54	6.6		134		1.9		2.1		1.11		63		1.451		1.515
14:55	6.6		136		1.89		2.12		1.12		64		1.65		1.816
14:57	6.7		136		1.92		2.13		1.11		65		1.433		1.498
14:58	6.4		136		1.85		2.1		1.13		63		1.688		1.822
15:00	6.5		134		1.86		2.08		1.12		62		1.458		1.567
15:01	6.6		134		1.89		2.14		1.13		65		1.513		1.585
15:03	6.3		134		1.82		2.07		1.14		58		1.833		1.947
15:04	6.6		136		1.9		2.12		1.12		62		1.51		1.662
15:06	6.6		136		1.9		2.11		1.11		61		1.522		1.635
15:07	6.8		136		1.96		2.2		1.12		63		1.425		1.509
15:09	6.5		136		1.86		2.09		1.12		57		1.773		1.877
15:10	6.8		137		1.96		2.19		1.12		65		1.541		1.659
15:12	6.7		137		1.93		2.18		1.13		66		1.638		1.754
15:13	6.9		137		1.98		2.25		1.13		68		1.572		1.644
15:15	6.7		137		1.92		2.18		1.14		67		1.487		1.568
15:16	6.8		137		1.95		2.23		1.14		67		1.559		1.608
15:18	6.2		137		1.78		2.06		1.16		59		1.936		2.08
15:20	6.6		139		1.9		2.11		1.11		62		1.515		1.573
15:21	6.8		139		1.96		2.17		1.11		64		1.467		1.516
15:22	6.7		139		1.92		2.17		1.13		65		1.573		1.666
15:24	6.9		139		1.98		2.22		1.12		67		1.461		1.571
15:25	6.8		139		1.95		2.24		1.14		64		1.761		1.782
15:27	6.7		139		1.92		2.16		1.12		62		1.53		1.651
15:28	6.2		139		1.77		1.96		1.11		53		1.46		1.606
15:30	6.7		139		1.93		2.19		1.13		62		1.934		2.024
15:32	6.8		139		1.94		2.14		1.1		61		1.504		1.64
15:33	6.8		139		1.97		2.19		1.12		66		1.615		1.729
15:35	6.9		139		1.99		2.26		1.13		68		1.609		1.662
15:36	7		139		2.02		2.3		1.14		68		1.549		1.631
15:38	6.7		139		1.92		2.2		1.15		63		1.851		1.951
15:39	7		139		2.03		2.28		1.12		67		1.429		1.545
15:40	7		139		2.02		2.3		1.14		69		1.579		1.629
15:42	6.6		139		1.89		2.18		1.15		64		1.749		1.869
15:43	6.8		139		1.96		2.25		1.15		69		1.633		1.733
15:45	6.9		141		1.98		2.28		1.15		68		1.586		1.715
15:46	7.2		141		2.06		2.38		1.16		72		1.511		1.58
15:47	6.8		141		1.96		2.28		1.16		71		1.557		1.655
15:49	7.1		141		2.04		2.38		1.16		74		1.618		1.664
15:51	6.2		141		1.78		2.1		1.18		60		1.91		2.078
15:52	6.9		141		1.99		2.25		1.13		64		1.427		1.493
15:53	7.2		141		2.08		2.32		1.12		67		1.485		1.519
15:55	7.1		141		2.05		2.31		1.13		68		1.487		1.581
15:56	7.1		141		2.05		2.32		1.13		68		1.527		1.594
15:57	7.1		141		2.05		2.36		1.15		70		1.607		1.677
15:59	7		141		2.02		2.32		1.15		71		1.592		1.708
16:00	7.1		141		2.05		2.38		1.16		71		1.59		1.655
16:01	7		141		2.01		2.32		1.15		70		1.49		1.552
16:03	7.2		141		2.08		2.4		1.15		75		1.58		1.645
16:04	7		141		2.02		2.36		1.17		73		1.62		1.744
16:05	7.1		142		2.05		2.39		1.16		72		1.692		1.783
16:07	7.1		142		2.04		2.4		1.17		75		1.553		1.637
16:08	7.2		142		2.08		2.45		1.18		74		1.719		1.811
16:09	6.5		142		1.88		2.21		1.18		72		1.559		1.656
16:11	7.4		142		2.12		2.5		1.18		78		1.629		1.701
16:12	7.1		142		2.04		2.41		1.18		73		1.696		1.783
16:13	7.2		142		2.06		2.42		1.17		75		1.601		1.664
16:15	6.7		144		1.93		2.27		1.18		67		1.731		1.889
16:16	7.4		144		2.13		2.46		1.15		76		1.514		1.573
16:17	7		144		2		2.34		1.17		71		1.725		1.846
16:19	7.3		144		2.1		2.45		1.16		76		1.565		1.586
16:20	7		146		2.02		2.39		1.18		70		1.758		1.935
16:21	7.2		146		2.08		2.44		1.17		73		1.524		1.579
16:23	7		146		2.01		2.36		1.17		70		1.688		1.843
16:24	7.2		146		2.06		2.43		1.18		80		1.668		1.796
16:25	7.2		146		2.06		2.46		1.2		78		1.697		1.799
16:27	7.1		146		2.04		2.43		1.19		77		1.676		1.738
16:29	6.4		146		1.84		2.17		1.18		60		1.946		2.083
16:30	6.9		148		2		2.33		1.16		69		1.562		1.727
16:31	7.3		148		2.1		2.44		1.16		75		1.655		1.685
16:33	7.3		148		2.11		2.49		1.18		75		1.714		1.81
16:34	7.5		148		2.15		2.54		1.18		78		1.724		1.793
16:36	7		148		2		2.36		1.18		71		1.775		1.827
16:37	7.1		148		2.05		2.43		1.18		70		1.82		1.932
16:38	7.4		148		2.14		2.54		1.19		78		1.662		1.803
16:40	7		148		2		2.4		1.2		69		1.83		1.911
16:41	7.2		148		2.08		2.47		1.19		74		1.632		1.784
16:43	7.6		148		2.18		2.58		1.19		80		1.645		1.715
16:44	7.2		150		2.08		2.5		1.2		73		1.793		1.897
16:45	7.3		150		2.11		2.53		1.2		77		1.712		1.826
16:47	7.1		150		2.03		2.43		1.2		69		1.831		1.958
16:48	7.3		150		2.1		2.47		1.18		76		1.62		1.677
16:50	6.7		151		1.92		2.25		1.17		64		1.571		1.713
16:51	7.3		151		2.09		2.49		1.19		70		1.877		1.995
16:53	7		151		2.02		2.39		1.18		72		1.603		1.786
16:54	7		151		2.02		2.43		1.21		73		1.829		1.889
16:55	7.2		155		2.08		2.48		1.19		75		1.683		1.845
16:57	7.4		155		2.11		2.54		1.2		76		1.799		1.899
16:58	7.4		155		2.14		2.57		1.2		76		1.669		1.767
17:00	6.9		151		1.98		2.36		1.19		66		1.861		2.043
17:01	7.7		151		2.22		2.61		1.18		78		1.655		1.647
17:02	7.6		151		2.18		2.61		1.2		82		1.653		1.801
17:04	7.6		151		2.18		2.65		1.21		79		1.68		1.776
17:05	7.4		151		2.11		2.57		1.22		79		1.682		1.786
17:06	7.3		151		2.1		2.57		1.22		79		1.749		1.843
17:08	7.4		151		2.11		2.59		1.22		79		1.755		1.835
17:09	7.3		151		2.1		2.57		1.22		77		1.71		1.858
17:10	7.3		151		2.1		2.57		1.23		76		1.781		1.874
17:12	7.7		151		2.2		2.69		1.22		81		1.672		1.798
17:13	7.3		151		2.1		2.6		1.23		78		1.697		1.832
17:14	7.4		151		2.14		2.63		1.23		79		1.669		1.765
17:15	7.4		153		2.12		2.61		1.24		79		1.774		1.88
17:17	7.6		153		2.18		2.67		1.23		81		1.704		1.816
17:18	7.6		153		2.17		2.69		1.24		84		1.658		1.816
17:19	7.8		153		2.23		2.77		1.24		87		1.632		1.711
17:20	7.5		153		2.16		2.7		1.25		83		1.694		1.818
17:22	7.4		153		2.12		2.66		1.25		82		1.804		1.878
17:23	7.5		153		2.17		2.69		1.24		85		1.716		1.798
17:24	7.3		155		2.08		2.58		1.24		82		1.654		1.797
17:26	7		155		2.02		2.54		1.26		74		1.851		1.936
17:27	7.7		155		2.22		2.77		1.24		84		1.742		1.867
17:28	7.5		155		2.16		2.67		1.23		75		1.782		1.951
17:29	7.9		155		2.28		2.82		1.24		89		1.662		1.771
17:30	7.8		155		2.25		2.77		1.23		87		1.645		1.751
17:32	7.6		155		2.18		2.71		1.25		84		1.71		1.84
17:33	7.8		155		2.25		2.81		1.25		86		1.659		1.737
17:34	7.4		155		2.14		2.66		1.24		82		1.677		1.771
17:35	7.6		155		2.19		2.74		1.25		84		1.729		1.84
17:36	7.5		155		2.15		2.66		1.24		86		1.649		1.77
17:38	7.5		155		2.15		2.68		1.25		86		1.655		1.762
17:39	7.3		155		2.1		2.62		1.25		85		1.654		1.771
17:40	7		155		2.01		2.56		1.27		76		1.866		2.023
17:41	7.7		155		2.21		2.76		1.25		90		1.638		1.692
17:43	7.6		155		2.18		2.71		1.25		84		1.7		1.834
17:44	7.7		146		2.22		2.79		1.26		89		1.66		1.736
17:45	7.5		146		2.17		2.73		1.26		88		1.678		1.73
17:46	7.6		146		2.18		2.76		1.27		92		1.655		1.745
17:47	7.6		146		2.2		2.77		1.26		89		1.706		1.723
17:48	7.4		146		2.13		2.7		1.27		86		1.721		1.863
17:49	7.6		146		2.19		2.77		1.26		90		1.676		1.755
17:51	7.6		151		2.18		2.74		1.26		88		1.711		1.772
17:52	7.5		151		2.17		2.73		1.26		89		1.64		1.726
17:53	7.5		151		2.14		2.71		1.26		84		1.712		1.827
17:54	7.5		151		2.14		2.68		1.25		85		1.539		1.634
17:55	7.7		157		2.21		2.78		1.25		91		1.631		1.73
17:56	7.3		157		2.09		2.64		1.26		87		1.637		1.74
17:58	7.2		157		2.08		2.63		1.27		80		1.789		1.908
17:59	7.7		157		2.22		2.77		1.25		88		1.611		1.671
18:00	7.6		157		2.2		2.74		1.25		87		1.636		1.753
18:01	7.6		157		2.2		2.72		1.24		83		1.593		1.672
18:01	Recovery
18:02	7.2		157		2.06		2.6		1.26		75		1.876		2.043
18:03	7.8		157		2.23		2.76		1.23		85		1.574		1.675
18:05	7.8		157		2.23		2.78		1.24		85		1.665		1.757
18:06	7.4		157		2.12		2.67		1.26		82		1.79		1.956
18:07	7.5		157		2.16		2.71		1.25		85		1.697		1.762
18:08	7.4		157		2.12		2.66		1.25		83		1.654		1.758
18:10	7.3		157		2.09		2.63		1.26		82		1.581		1.691
18:11	7.4		155		2.12		2.66		1.25		83		1.652		1.73
18:12	7.3		155		2.09		2.63		1.26		82		1.672		1.773
18:13	7.4		155		2.11		2.66		1.26		83		1.673		1.833
18:14	7.4		155		2.13		2.68		1.26		82		1.707		1.789
18:16	7.1		155		2.03		2.58		1.27		79		1.715		1.899
18:17	7.3		155		2.11		2.66		1.26		83		1.686		1.755
18:18	7.1		155		2.03		2.56		1.26		76		1.765		1.856
18:20	7.3		153		2.1		2.61		1.25		78		1.727		1.785
18:21	7.3		153		2.1		2.62		1.24		78		1.634		1.688
18:22	7.1		153		2.03		2.51		1.23		75		1.546		1.628
18:23	6.9		153		1.97		2.48		1.26		76		1.698		1.828
18:25	6.4		151		1.84		2.3		1.25		70		1.585		1.712
18:26	7		151		2		2.53		1.26		77		1.722		1.828
18:27	7.1		151		2.03		2.57		1.26		82		1.627		1.744
18:29	6.8		151		1.96		2.5		1.28		78		1.639		1.72
18:30	6.5		150		1.88		2.4		1.28		75		1.608		1.675
18:31	6.7		150		1.92		2.48		1.29		75		1.64		1.738
18:33	6.4		150		1.85		2.4		1.29		75		1.629		1.779
18:34	6.6		150		1.9		2.46		1.29		78		1.605		1.658
18:35	6.3		148		1.81		2.38		1.31		73		1.658		1.792
18:36	6.5		148		1.87		2.47		1.32		79		1.659		1.763
18:38	6.2		148		1.78		2.4		1.35		76		1.65		1.726
18:39	6.1		148		1.75		2.36		1.34		76		1.554		1.674
18:41	5.5		146		1.58		2.08		1.32		60		1.6		1.619
18:42	6		146		1.73		2.3		1.33		70		1.609		1.775
18:43	5.6		146		1.6		2.15		1.35		66		1.469		1.701
18:51			142						1.15
19:07			136
19:22			127
19:38			120
19:54			116
20:10			110
20:25			108
20:41			103
20:57			100
21:13			97
	5.27578	2.52506	111.543	791.99	1.51651	0.20896	1.63657	0.423877	1.04748	0.0144002	48.9083	412.153	1.31098	0.0980603	1.38167	0.112528
	METS						HR						VO2						VCO2						RER						VE						Vtex						Vtin						LABEL
	Rest		Test		Recovery		Rest		Test		Recovery		Rest		Test		Recovery		Rest		Test		Recovery		Rest		Test		Recovery		Rest		Test		Recovery		Rest		Test		Recovery		Rest		Test		Recovery
	MEDIA	VAR	MEDIA	VAR	MEDIA	VAR	MEDIA	VAR	MEDIA	VAR	MEDIA	VAR	MEDIA	VAR	MEDIA	VAR	MEDIA	VAR	MEDIA	VAR	MEDIA	VAR	MEDIA	VAR	MEDIA	VAR	MEDIA	VAR	MEDIA	VAR	MEDIA	VAR	MEDIA	VAR	MEDIA	VAR	MEDIA	VAR	MEDIA	VAR	MEDIA	VAR	MEDIA	VAR	MEDIA	VAR	MEDIA	VAR	BIN
	1.05556	0.632778	5.17743	2.48793	6.9	0.35	57.875	2.125	108.987	741.671	143.93	303.924	0.308889	0.0519861	1.48846	0.206178	1.9797	0.028128	0.303333	0.05845	1.58294	0.397506	2.52242	0.0271752	0.935556	0.0221278	1.03352	0.0118824	1.27118	0.00156827	8.125	14.4107	47.1688	382.207	77.6364	31.4886	0.697125	0.166457	1.29023	0.0961178	1.65352	0.00582076	0.7905	0.0989891	1.35871	0.109634	1.76091	0.00795527	1
	1.05556	0.632778	5.17743	2.48793	6.9	0.35	57.875	2.125	108.987	741.671	143.93	303.924	0.308889	0.0519861	1.48846	0.206178	1.9797	0.028128	0.303333	0.05845	1.58294	0.397506	2.52242	0.0271752	0.935556	0.0221278	1.03352	0.0118824	1.27118	0.00156827	8.125	14.4107	47.1688	382.207	77.6364	31.4886	0.697125	0.166457	1.29023	0.0961178	1.65352	0.00582076	0.7905	0.0989891	1.35871	0.109634	1.76091	0.00795527	1
[truncated: 1 more columns]
