# Supplementary material for: On the development of diagnostic support algorithms based on CPET biosignals data via machine learning and wavelets
Source: PeerJ journal article supplement (doi:10.7717/peerj-cs.2474), 2025-01-30
Supplement: raw_data.zip [file Subject26_BxB.xlsx]

## Sheet: Demographics
Gender:	female
Age:	67
Height (cm):	172
Weight (kg):	95.7
BMI:	32
Condition:	Metabolic Syndrome

## Sheet: Subject26_BxB
Time	METS		HR		V'O2		V'CO2		RER		V'E		VTex		VTin
min			1/min		L/min		L/min				L/min		L		L
00:00	Rest
01:28									0.88
01:34	0.8		90		0.26		0.21		0.82		8		0.804		0.782
01:37	0.9		93		0.29		0.23		0.8		10		0.514		0.592
01:42	1.5		93		0.52		0.42		0.82		14		1.363		1.298
01:46	1.2		89		0.39		0.31		0.8		13		0.798		0.882
01:51	1.2		89		0.4		0.33		0.83		13		0.975		1.062
01:54	1		90		0.33		0.27		0.81		11		0.687		0.609
01:58	1		90		0.34		0.27		0.81		12		0.663		0.739
02:02	1.3		88		0.42		0.34		0.81		13		0.893		0.836
02:06	0.9		85		0.3		0.24		0.79		10		0.595		0.638
02:06	Test
02:09	1.1		85		0.38		0.31		0.81		13		0.781		0.835
02:12	0.9		85		0.3		0.25		0.81		11		0.581		0.669
02:14	0.7		86		0.24		0.19		0.8		11		0.326		0.6
02:20	1.4		87		0.46		0.36		0.77		12		1.076		0.735
02:23	1.5		87		0.52		0.39		0.75		14		0.775		0.864
02:25	0.8		83		0.27		0.2		0.74		11		0.297		0.736
02:29	2.2		82		0.74		0.52		0.7		17		1.343		0.545
02:32	2.3		82		0.76		0.54		0.71		19		0.961		1.121
02:35	2.1		88		0.71		0.5		0.71		18		0.795		0.855
02:38	2.4		88		0.79		0.57		0.72		20		0.928		0.94
02:40	2.3		91		0.76		0.56		0.74		21		0.97		1.013
02:43	2.4		91		0.81		0.6		0.74		21		1.034		1.029
02:46	2.3		90		0.75		0.56		0.74		20		0.943		0.886
02:49	2.1		90		0.7		0.52		0.74		19		0.886		0.923
02:52	2.1		90		0.7		0.52		0.74		19		0.792		0.895
02:54	2.4		90		0.79		0.58		0.73		21		0.859		0.934
02:57	2.7		92		0.89		0.65		0.73		22		1.087		1.032
02:59	2		92		0.66		0.48		0.73		19		0.703		0.897
03:03	2		94		0.67		0.45		0.67		16		0.969		0.447
03:05	2.7		94		0.89		0.6		0.67		21		0.913		1.096
03:08	3		94		1.02		0.69		0.68		23		0.993		1.086
03:11	2.9		95		0.96		0.66		0.69		22		0.982		1.052
03:13	3		95		1		0.69		0.69		23		0.993		1.011
03:16	2.5		94		0.85		0.58		0.69		20		0.899		0.903
03:19	3		94		0.99		0.68		0.68		22		1.044		0.974
03:21	2.8		93		0.94		0.65		0.69		22		0.991		1.115
03:24	2.9		93		0.98		0.68		0.7		23		1.03		1.036
03:27	3.2		94		1.06		0.73		0.69		23		1.168		1.045
03:30	2.8		95		0.95		0.65		0.69		22		0.941		1.055
03:33	2.9		95		0.97		0.67		0.69		22		1.068		1.072
03:35	3.4		96		1.15		0.8		0.69		25		1.165		1.164
03:38	3.2		96		1.06		0.75		0.71		24		1.15		1.251
03:41	3.2		96		1.06		0.75		0.71		25		1.139		1.149
03:44	3.1		96		1.02		0.73		0.71		23		1.098		1.163
03:47	3.1		99		1.03		0.73		0.71		24		1.084		1.144
03:49	1.8		99		0.59		0.43		0.72		16		0.662		1.069
03:51	4.1		101		1.38		0.97		0.7		29		1.142		0.871
03:54	3.2		101		1.06		0.75		0.71		24		1.065		1.122
03:57	3.1		99		1.03		0.73		0.7		24		0.953		1.048
03:59	3.7		97		1.23		0.88		0.72		28		1.301		1.266
04:02	3.4		97		1.12		0.81		0.72		26		1.176		1.278
04:04	3.1		97		1.05		0.76		0.72		25		0.993		1.094
04:07	3.6		97		1.22		0.88		0.73		28		1.195		1.176
04:09	3.3		97		1.1		0.82		0.74		27		1.117		1.228
04:12	3.2		97		1.09		0.8		0.74		26		1.086		1.091
04:15	3.4		99		1.12		0.84		0.75		26		1.238		1.265
04:17	3.3		99		1.1		0.82		0.75		26		1.148		1.248
04:20	3.4		99		1.15		0.85		0.74		27		1.193		1.192
04:23	3.5		99		1.17		0.87		0.74		27		1.302		1.263
04:26	3.3		98		1.09		0.82		0.75		26		1.225		1.36
04:28	3.3		98		1.11		0.83		0.74		26		1.092		1.164
04:31	3.2		99		1.09		0.8		0.74		25		1.012		1.025
04:34	3.3		99		1.1		0.82		0.74		25		1.165		1.127
04:35	2.7		99		0.9		0.64		0.7		22		0.685		0.711
04:38	3.2		99		1.09		0.8		0.74		25		1.109		1.305
04:41	3.2		98		1.08		0.8		0.75		25		1.178		1.212
04:44	3.3		98		1.11		0.82		0.74		25		1.299		1.294
04:49	3.7		99		1.23		0.94		0.76		27		2.05		2.02
04:51	3.1		100		1.05		0.79		0.75		25		1.066		1.243
04:54	3.2		100		1.06		0.79		0.75		25		1.029		1.11
04:56	3.2		99		1.07		0.8		0.75		24		1.135		1.158
05:00	3.6		98		1.2		0.9		0.75		26		1.408		1.367
05:03	3.4		98		1.12		0.85		0.76		25		1.451		1.559
05:06	3.5		100		1.19		0.91		0.77		28		1.371		1.565
05:10	3.6		101		1.21		0.93		0.77		26		1.708		1.567
05:14	3.3		102		1.11		0.87		0.78		25		1.775		1.901
05:18	3.3		102		1.1		0.87		0.79		27		1.41		1.587
05:20	3.4		103		1.14		0.89		0.78		28		1.178		1.301
05:23	3.4		103		1.13		0.88		0.78		28		1.113		1.255
05:25	3.5		104		1.19		0.92		0.77		28		1.115		1.101
05:27	3.4		104		1.15		0.88		0.77		27		1.062		1.128
05:30	3.4		104		1.12		0.87		0.77		27		1.055		1.134
05:32	3.4		104		1.14		0.88		0.77		27		1.097		1.167
05:34	3.5		103		1.17		0.9		0.77		28		1.084		1.163
05:37	3.7		103		1.25		0.96		0.77		28		1.444		1.321
05:40	3.4		103		1.13		0.89		0.79		28		1.309		1.55
05:43	3.4		103		1.14		0.89		0.78		28		1.107		1.151
05:45	3.5		101		1.18		0.93		0.79		30		1.205		1.279
05:48	3.7		101		1.23		0.97		0.79		30		1.301		1.249
05:50	3.5		96		1.18		0.94		0.8		28		1.274		1.383
05:53	3.5		96		1.18		0.93		0.79		29		1.282		1.305
05:56	3.4		101		1.14		0.91		0.8		28		1.25		1.334
05:58	3.6		101		1.2		0.96		0.8		30		1.303		1.284
06:01	3.5		101		1.17		0.93		0.8		29		1.162		1.261
06:03	3.4		101		1.15		0.92		0.8		28		1.164		1.212
06:06	3.4		105		1.15		0.92		0.81		28		1.219		1.373
06:08	3.7		105		1.23		0.98		0.8		30		1.285		1.282
06:11	3.5		110		1.18		0.92		0.78		27		1.303		1.214
06:14	3.2		110		1.06		0.84		0.79		25		1.109		1.364
06:17	3.7		104		1.25		0.99		0.79		28		1.416		1.338
06:20	3.7		104		1.22		0.98		0.8		30		1.38		1.565
06:22	3.7		104		1.26		1		0.79		30		1.331		1.348
06:25	3.5		106		1.17		0.93		0.8		29		1.216		1.355
06:27	3.7		106		1.24		0.98		0.79		30		1.239		1.241
06:30	3.8		109		1.26		0.99		0.78		28		1.351		1.265
06:34	3.6		109		1.2		0.97		0.81		28		1.559		1.82
06:37	3.8		107		1.29		1.04		0.81		31		1.581		1.558
06:40	3.6		107		1.21		0.98		0.81		29		1.468		1.572
06:43	3.8		107		1.26		1.02		0.81		30		1.443		1.488
06:45	3.7		109		1.24		1.02		0.82		30		1.396		1.575
06:49	4		109		1.35		1.1		0.82		31		1.575		1.486
06:51	3.8		109		1.27		1.04		0.82		30		1.492		1.552
06:55	3.8		109		1.26		1.06		0.84		31		1.603		1.788
06:58	3.8		109		1.28		1.05		0.82		29		1.501		1.425
07:01	3.8		109		1.28		1.06		0.83		30		1.585		1.658
07:04	4		109		1.34		1.11		0.83		31		1.689		1.673
07:07	3.7		112		1.24		1.04		0.84		29		1.539		1.754
07:10	3.8		113		1.27		1.05		0.83		30		1.353		1.512
07:12	3.8		113		1.27		1.07		0.84		32		1.325		1.494
07:15	4.3		112		1.43		1.18		0.83		33		1.567		1.392
07:18	3.8		112		1.27		1.09		0.85		32		1.559		1.864
07:21	4.1		111		1.37		1.16		0.85		34		1.475		1.502
07:23	4.1		111		1.38		1.17		0.85		34		1.482		1.515
07:26	3.8		113		1.28		1.1		0.86		32		1.38		1.532
07:29	4		113		1.33		1.14		0.86		33		1.406		1.552
07:31	4.2		111		1.39		1.18		0.85		34		1.486		1.402
07:34	4		114		1.33		1.14		0.85		32		1.587		1.575
07:37	4		114		1.35		1.16		0.86		33		1.565		1.759
07:39	3.9		116		1.32		1.13		0.86		34		1.343		1.494
07:42	4.1		116		1.38		1.18		0.85		33		1.475		1.401
07:46	4.2		114		1.39		1.23		0.88		35		2.177		2.341
07:49	4.1		114		1.37		1.17		0.86		33		1.523		1.456
07:51	3.8		112		1.26		1.1		0.87		32		1.458		1.695
07:54	4		112		1.36		1.16		0.85		35		1.336		1.406
07:56	3.7		112		1.25		1.07		0.86		31		1.222		1.303
07:58	4		112		1.34		1.14		0.85		33		1.292		1.39
08:01	3.8		115		1.29		1.08		0.84		31		1.211		1.269
08:03	4.1		115		1.36		1.15		0.84		33		1.304		1.431
08:06	4.3		113		1.44		1.21		0.84		34		1.493		1.446
08:08	4.2		113		1.41		1.2		0.85		35		1.571		1.781
08:11	4.2		115		1.4		1.19		0.85		34		1.495		1.477
08:14	4.2		115		1.4		1.2		0.86		33		1.606		1.685
08:17	4.4		110		1.46		1.26		0.86		35		1.755		1.765
08:19	4.2		105		1.4		1.21		0.86		36		1.454		1.655
08:22	4.2		105		1.41		1.23		0.87		36		1.552		1.574
08:24	4.5		103		1.49		1.29		0.87		37		1.589		1.58
08:27	4.3		103		1.42		1.23		0.87		35		1.48		1.57
08:30	4.5		118		1.49		1.3		0.87		36		1.723		1.698
08:33	4.2		118		1.41		1.25		0.88		35		1.823		1.93
08:36	4.4		117		1.48		1.3		0.87		36		1.718		1.753
08:39	4.2		117		1.4		1.22		0.87		34		1.602		1.688
08:42	4.3		113		1.43		1.26		0.88		35		1.855		1.931
08:45	4.2		108		1.4		1.24		0.89		34		1.83		1.94
08:48	4.3		108		1.45		1.28		0.88		35		1.79		1.901
08:51	4.2		109		1.41		1.24		0.88		34		1.638		1.713
08:54	4.2		114		1.41		1.24		0.88		33		1.839		1.809
08:58	4.2		114		1.4		1.22		0.87		32		1.797		1.919
09:01	4.6		120		1.56		1.35		0.87		39		1.961		2.085
09:03	4.6		120		1.54		1.36		0.88		40		1.63		1.944
09:05	4.8		120		1.59		1.43		0.9		41		1.545		1.726
09:08	4.8		120		1.61		1.45		0.9		42		1.495		1.567
09:10	4.6		120		1.55		1.4		0.9		39		1.568		1.645
09:13	4.5		120		1.52		1.37		0.9		38		1.732		1.678
09:16	4		122		1.35		1.22		0.9		34		1.59		1.769
09:18	4.2		122		1.41		1.26		0.89		34		1.635		1.74
09:21	4.4		121		1.48		1.33		0.9		36		1.818		1.883
09:24	4.3		114		1.45		1.29		0.89		35		1.74		1.797
09:27	4.5		114		1.51		1.34		0.89		36		1.668		1.778
09:30	4.4		114		1.46		1.31		0.89		37		1.617		1.764
09:33	4.6		114		1.53		1.38		0.9		38		1.743		1.791
09:35	4.3		114		1.45		1.31		0.9		36		1.55		1.75
09:37	5.1		114		1.72		1.55		0.9		45		1.651		1.798
09:40	4.9		122		1.64		1.5		0.92		43		1.558		1.701
09:42	4.6		122		1.53		1.4		0.91		40		1.441		1.518
09:44	4.7		122		1.56		1.43		0.92		42		1.458		1.647
09:46	5		122		1.67		1.54		0.92		44		1.539		1.68
09:48	4.8		122		1.6		1.48		0.92		42		1.623		1.624
09:50	4.8		123		1.61		1.49		0.93		45		1.588		1.842
09:52	5		123		1.67		1.54		0.93		46		1.569		1.644
09:55	4.7		123		1.56		1.46		0.94		42		1.531		1.681
09:57	4.8		123		1.62		1.52		0.94		44		1.463		1.694
09:59	4.8		123		1.62		1.53		0.94		45		1.522		1.634
10:00	4.6		118		1.55		1.46		0.94		44		1.371		1.527
10:02	4.7		118		1.57		1.48		0.94		43		1.421		1.488
10:05	4.6		126		1.54		1.45		0.94		43		1.548		1.624
10:07	4.8		126		1.6		1.49		0.93		41		1.635		1.642
10:09	4.6		126		1.55		1.45		0.94		42		1.512		1.765
10:11	4.9		126		1.65		1.56		0.94		46		1.511		1.662
10:13	5		126		1.68		1.59		0.94		48		1.549		1.671
10:15	4.9		133		1.64		1.56		0.95		46		1.56		1.658
10:17	4.6		133		1.55		1.49		0.96		44		1.535		1.73
10:19	4.8		133		1.6		1.52		0.95		44		1.467		1.592
10:21	4.7		133		1.58		1.51		0.95		45		1.611		1.735
10:24	4.7		133		1.57		1.49		0.95		43		1.498		1.728
10:26	5		126		1.66		1.57		0.94		46		1.751		1.725
10:28	4.5		126		1.51		1.43		0.95		42		1.607		1.833
10:30	4.7		127		1.57		1.47		0.94		42		1.521		1.734
10:33	4.4		127		1.49		1.39		0.94		38		1.448		1.561
10:35	4.8		131		1.61		1.5		0.93		44		1.548		1.711
10:37	5		131		1.66		1.56		0.94		44		1.719		1.828
10:39	5.1		130		1.71		1.61		0.94		45		1.832		1.919
10:42	4.8		130		1.6		1.52		0.95		45		1.637		1.948
10:44	5.1		130		1.7		1.62		0.95		47		1.658		1.761
10:47	4.8		131		1.59		1.55		0.97		43		2.243		2.4
10:49	4.7		131		1.57		1.5		0.95		45		1.43		1.699
10:51	5.1		121		1.7		1.6		0.94		47		1.522		1.58
10:53	4.8		121		1.62		1.53		0.94		44		1.494		1.624
10:55	4.7		114		1.58		1.49		0.95		44		1.49		1.606
10:57	5		114		1.67		1.58		0.94		45		1.594		1.767
10:59	5.1		114		1.71		1.63		0.96		48		1.594		1.81
11:01	5		113		1.66		1.59		0.96		47		1.55		1.627
11:03	5.1		113		1.72		1.67		0.97		49		1.735		1.857
11:05	4.8		122		1.61		1.57		0.97		46		1.524		1.669
11:07	4.8		122		1.62		1.55		0.96		44		1.576		1.592
11:09	5		134		1.67		1.6		0.96		47		1.594		1.66
11:11	4.9		134		1.65		1.59		0.97		46		1.628		1.835
11:13	4.8		134		1.61		1.54		0.96		47		1.384		1.633
11:15	5.1		136		1.69		1.6		0.95		46		1.317		1.275
11:17	5		136		1.67		1.6		0.96		47		1.495		1.665
11:19	5.1		136		1.72		1.66		0.96		47		1.484		1.645
11:21	5.3		136		1.77		1.72		0.97		49		1.716		1.841
11:23	5.3		136		1.79		1.74		0.97		51		1.69		1.782
11:25	4.8		136		1.61		1.58		0.98		45		1.52		1.705
11:27	5.3		136		1.77		1.71		0.97		48		1.68		1.755
11:29	5.2		136		1.73		1.68		0.97		48		1.669		1.789
11:31	5.2		118		1.74		1.7		0.98		49		1.827		2.015
11:33	5.3		118		1.76		1.74		0.98		52		1.751		1.982
11:35	5.3		131		1.78		1.77		1		54		1.716		1.895
11:37	5.1		131		1.7		1.7		1		52		1.698		1.768
11:39	5		131		1.68		1.68		1		50		1.637		1.795
11:41	5		139		1.66		1.66		1		48		1.604		1.71
11:43	4.2		139		1.4		1.39		0.99		37		1.469		1.725
11:43	Recovery
11:46	5.6		133		1.88		1.83		0.98		51		1.954		1.901
11:48	5.1		133		1.71		1.7		0.99		50		1.896		2.259
11:50	4.9		133		1.64		1.64		1		48		1.754		2.036
11:52	4.8		133		1.62		1.64		1.01		48		1.625		1.758
11:54	4.9		137		1.63		1.64		1		48		1.673		1.737
11:57	4.7		137		1.57		1.58		1.01		45		1.788		1.891
11:59	4.6		137		1.54		1.57		1.02		48		1.693		1.975
12:01	4.7		136		1.58		1.59		1.01		45		1.642		1.666
12:03	4.5		136		1.5		1.53		1.02		46		1.646		1.896
12:05	4.7		133		1.58		1.61		1.01		47		1.824		1.818
12:08	4.5		133		1.51		1.54		1.02		45		1.719		1.964
12:10	4.4		131		1.47		1.51		1.03		46		1.62		1.813
12:12	4.7		131		1.57		1.63		1.03		48		1.774		1.845
12:14	4.3		131		1.43		1.49		1.04		44		1.707		1.839
12:17	4.4		131		1.47		1.52		1.03		45		1.817		1.955
12:19	4.4		131		1.46		1.51		1.04		45		1.667		1.885
12:21	4.5		130		1.49		1.54		1.03		45		1.741		1.787
12:24	4.3		130		1.43		1.49		1.04		43		1.739		1.877
12:26	4.1		127		1.37		1.44		1.05		42		1.651		1.899
12:29	4.2		127		1.39		1.46		1.04		42		1.729		1.774
12:31	3.9		126		1.3		1.36		1.05		40		1.768		1.924
12:47			122
13:03			122
13:19			121
13:34			115
13:50			112
14:06			107
14:22			111
14:37			104
14:53			102
15:09			105
15:25			107
15:41			104
15:56			106
16:12			99
	3.92881	0.840985	111.903	200.565	1.31469	0.0943217	1.14638	0.13833	0.852675	0.0102841	33.9753	95.9498	1.41011	0.0966478	1.49612	0.12053
	METS						HR						VO2						VCO2						RER						VE						Vtex						Vtin						LABEL
	Rest		Test		Recovery		Rest		Test		Recovery		Rest		Test		Recovery		Rest		Test		Recovery		Rest		Test		Recovery		Rest		Test		Recovery		Rest		Test		Recovery		Rest		Test		Recovery
	MEDIA	VAR	MEDIA	VAR	MEDIA	VAR	MEDIA	VAR	MEDIA	VAR	MEDIA	VAR	MEDIA	VAR	MEDIA	VAR	MEDIA	VAR	MEDIA	VAR	MEDIA	VAR	MEDIA	VAR	MEDIA	VAR	MEDIA	VAR	MEDIA	VAR	MEDIA	VAR	MEDIA	VAR	MEDIA	VAR	MEDIA	VAR	MEDIA	VAR	MEDIA	VAR	MEDIA	VAR	MEDIA	VAR	MEDIA	VAR	BIN
	1.08889	0.0511111	3.86712	0.864298	4.58095	0.136619	89.6667	6	110.117	185.362	123.229	152.417	0.361111	0.00643611	1.29428	0.096964	1.53048	0.0163248	0.291111	0.00433611	1.10698	0.132515	1.56286	0.0101414	0.817	0.000623333	0.836712	0.00826561	1.02143	0.000372857	11.5556	3.77778	32.8604	89.9487	45.7619	7.39048	0.810222	0.0638352	1.37941	0.0941787	1.73462	0.00773075	0.826444	0.053551	1.45972	0.115203	1.8809	0.0152534	1
	1.08889	0.0511111	3.86712	0.864298	4.58095	0.136619	89.6667	6	110.117	185.362	123.229	152.417	0.361111	0.00643611	1.29428	0.096964	1.53048	0.0163248	0.291111	0.00433611	1.10698	0.132515	1.56286	0.0101414	0.817	0.000623333	0.836712	0.00826561	1.02143	0.000372857	11.5556	3.77778	32.8604	89.9487	45.7619	7.39048	0.810222	0.0638352	1.37941	0.0941787	1.73462	0.00773075	0.826444	0.053551	1.45972	0.115203	1.8809	0.0152534	1
[truncated: 1 more columns]
