# Supplementary material for: On the development of diagnostic support algorithms based on CPET biosignals data via machine learning and wavelets
Source: PeerJ journal article supplement (doi:10.7717/peerj-cs.2474), 2025-01-30
Supplement: raw_data.zip [file Subject27_BxB.xlsx]

## Sheet: Demographics
Gender:	female
Age:	69
Height (cm):	166
Weight (kg):	113.6
BMI:	41
Condition:	Metabolic Syndrome

## Sheet: Subject27_BxB
Time	METS		HR		V'O2		V'CO2		RER		V'E		VTex		VTin
min			1/min		L/min		L/min				L/min		L		L
00:00	Rest
00:02	1.7				0.69		0.58		0.84		23		0.657
00:05	1.2		111		0.48		0.41		0.87		17		0.983		0.981
00:09	0.8		111		0.3		0.24		0.8		10		0.557		0.442
00:12	1.1		112		0.45		0.35		0.78		14		0.656		0.627
00:14	1.1		112		0.45		0.35		0.77		14		0.635		0.588
00:17	1.2		112		0.49		0.38		0.78		15		0.613		0.64
00:19	1.1		112		0.46		0.35		0.77		14		0.503		0.466
00:22	1.3		112		0.5		0.4		0.79		16		0.811		0.761
00:24	0.9		112		0.36		0.27		0.76		13		0.369		0.4
00:27	1.3		111		0.52		0.4		0.78		16		0.77		0.645
00:29	0.8		111		0.3		0.23		0.74		11		0.339		0.362
00:30	1		110		0.39		0.29		0.75		13		0.402		0.48
00:33	1.4		110		0.56		0.43		0.77		17		0.652		0.583
00:33	Test
00:36	1.6		109		0.63		0.5		0.79		19		0.939		0.943
00:38	1.4		109		0.56		0.45		0.81		18		0.797		0.841
00:41	1.3		110		0.53		0.42		0.79		16		0.617		0.509
00:43	1.2		112		0.48		0.36		0.75		14		0.483		0.408
00:45	1.5		113		0.61		0.45		0.73		17		0.693		0.609
00:48	1.8		113		0.71		0.52		0.73		19		0.784		0.845
00:50	1.9		111		0.76		0.57		0.75		21		0.94		0.963
00:53	1.9		111		0.75		0.56		0.75		21		0.826		0.809
00:55	1.9		117		0.76		0.58		0.75		21		0.868		0.861
00:57	2		117		0.79		0.59		0.75		22		0.839		0.783
00:59	2.1		116		0.82		0.6		0.74		23		0.838		0.791
01:01	1.9		116		0.76		0.56		0.74		22		0.684		0.721
01:03	2.1		116		0.83		0.62		0.75		24		0.783		0.746
01:05	2.2		111		0.88		0.66		0.75		25		0.949		0.949
01:08	2.1		111		0.84		0.63		0.75		25		0.916		0.918
01:10	2.2		112		0.87		0.65		0.74		24		0.866		0.924
01:12	2.4		112		0.95		0.71		0.74		26		1.004		1.015
01:14	2.5		113		0.98		0.73		0.74		27		1.007		1.028
01:16	2.2		113		0.88		0.64		0.73		24		0.76		0.781
01:19	2.4		113		0.96		0.71		0.74		26		0.984		1.01
01:21	2.4		115		0.97		0.72		0.74		27		0.937		0.953
01:23	2.4		115		0.94		0.7		0.74		26		0.931		0.951
01:25	2.4		116		0.97		0.72		0.74		25		1.003		1.117
01:28	2.6		116		1.05		0.78		0.74		28		1.123		1.15
01:30	2.7		118		1.08		0.81		0.75		29		1.245		1.264
01:33	2.6		118		1.03		0.77		0.75		28		1.045		1.08
01:35	2.8		122		1.12		0.84		0.76		30		1.17		1.189
01:37	2.6		122		1.02		0.77		0.75		27		0.965		0.962
01:40	2.8		122		1.12		0.85		0.76		30		1.367		1.409
01:42	2.8		122		1.12		0.86		0.77		30		1.157		1.265
01:44	2.9		121		1.16		0.9		0.78		32		1.232		1.254
01:47	2.8		121		1.1		0.85		0.78		30		1.154		1.118
01:49	2.8		121		1.09		0.86		0.78		30		1.122		1.228
01:51	2.9		123		1.16		0.92		0.79		34		1.222		1.258
01:53	3		123		1.18		0.95		0.8		34		1.343		1.389
01:55	2.8		123		1.1		0.88		0.8		32		1.097		1.173
01:57	2.8		123		1.12		0.9		0.81		33		1.076		1.142
01:59	2.6		126		1.03		0.84		0.82		33		0.977		1.167
02:01	3		126		1.21		1		0.83		36		1.122		1.065
02:03	3.1		126		1.22		1.01		0.82		37		1.203		1.28
02:05	3.3		125		1.31		1.09		0.83		40		1.456		1.469
02:07	2.9		125		1.15		0.97		0.84		36		1.297		1.37
02:10	3.2		127		1.27		1.09		0.86		39		1.462		1.53
02:12	3.1		127		1.23		1.06		0.86		40		1.367		1.396
02:14	2.9		127		1.14		0.98		0.86		36		1.122		1.167
02:15	2.3		127		0.91		0.79		0.87		32		0.865		1.234
02:18	2.3		127		0.91		0.76		0.84		25		1.333		1.071
02:20	3.3		144		1.32		1.08		0.82		35		1.187		1.243
02:22	3.7		144		1.46		1.21		0.83		43		1.473		1.544
02:25	3.5		139		1.39		1.17		0.85		42		1.592		1.625
02:27	3		139		1.19		1.02		0.86		37		1.222		1.36
02:29	3.4		139		1.37		1.2		0.88		45		1.537		1.664
02:31	3.4		142		1.34		1.19		0.89		44		1.443		1.468
02:33	3.2		142		1.27		1.15		0.91		45		1.451		1.564
02:35	3.2		130		1.27		1.16		0.92		44		1.397		1.422
02:37	3.1		130		1.24		1.15		0.93		43		1.609		1.659
02:39	3.1		130		1.23		1.14		0.92		43		1.413		1.446
02:41	3.1		141		1.23		1.13		0.92		42		1.276		1.354
02:42	3		141		1.2		1.1		0.92		40		1.28		1.365
02:44	2.9		133		1.15		1.04		0.91		38		1.146		1.221
02:46	3.2		133		1.26		1.15		0.91		41		1.371		1.421
02:48	3		133		1.2		1.07		0.9		39		1.18		1.237
02:50	3.2		133		1.28		1.17		0.91		44		1.398		1.537
02:52	3.3		133		1.31		1.19		0.91		45		1.493		1.579
02:54	3.2		133		1.29		1.19		0.92		45		1.652		1.69
02:56	3.2		133		1.26		1.16		0.93		44		1.373		1.47
02:58	3.2		133		1.27		1.18		0.93		45		1.515		1.582
03:00	3.1		133		1.23		1.14		0.93		43		1.403		1.496
03:02	3.3		133		1.31		1.21		0.93		46		1.371		1.402
03:04	3.1		133		1.22		1.15		0.94		43		1.397		1.407
03:06	3		134		1.19		1.1		0.93		40		1.473		1.548
03:08	3.2		134		1.28		1.19		0.93		44		1.379		1.485
03:10	3.2		133		1.28		1.19		0.93		45		1.438		1.473
03:12	3.1		133		1.23		1.15		0.93		43		1.36		1.426
03:14	3		133		1.19		1.09		0.92		41		1.247		1.293
03:15	3		136		1.21		1.12		0.92		41		1.262		1.37
03:18	3.3		136		1.3		1.21		0.93		44		1.751		1.784
03:20	3.2		146		1.27		1.18		0.93		43		1.584		1.668
03:22	3		146		1.18		1.09		0.92		40		1.342		1.362
03:24	3		146		1.21		1.1		0.91		41		1.325		1.365
03:26	3		134		1.18		1.07		0.91		39		1.241		1.381
03:28	3		134		1.18		1.07		0.91		39		1.165		1.223
03:29	2.1		133		0.85		0.73		0.87		25		0.756		0.946
03:31	3.6		133		1.42		1.26		0.89		45		1.408		1.403
03:33	3.5		133		1.38		1.23		0.89		45		1.34		1.454
03:35	2.7		130		1.06		0.95		0.89		34		1.072		1.259
03:37	3.5		130		1.4		1.27		0.91		47		1.523		1.594
03:39	3.5		130		1.39		1.29		0.93		49		1.661		1.728
03:41	3.4		129		1.37		1.27		0.93		47		1.556		1.563
03:43	3.3		129		1.3		1.22		0.94		47		1.45		1.569
03:45	3.3		133		1.31		1.25		0.95		48		1.447		1.525
03:47	3.3		133		1.3		1.24		0.95		46		1.484		1.567
03:48	3.1		133		1.24		1.2		0.96		46		1.418		1.579
03:50	3.2		134		1.27		1.23		0.96		47		1.484		1.547
03:52	3.3		134		1.31		1.26		0.96		49		1.451		1.487
03:54	3		134		1.21		1.16		0.96		45		1.261		1.34
03:56	3.2		137		1.26		1.21		0.96		47		1.427		1.504
03:58	3.2		137		1.27		1.21		0.95		45		1.463		1.442
03:59	3.1		139		1.24		1.18		0.95		45		1.347		1.531
04:01	3.3		139		1.31		1.26		0.96		49		1.474		1.57
04:03	3.3		139		1.3		1.25		0.96		48		1.413		1.437
04:05	3.1		139		1.24		1.19		0.96		46		1.298		1.379
04:07	3.2		139		1.26		1.21		0.96		46		1.425		1.574
04:08	3.2		139		1.28		1.23		0.96		46		1.441		1.536
04:10	3.3		139		1.31		1.25		0.95		47		1.462		1.48
04:12	3.2		139		1.26		1.19		0.95		43		1.61		1.628
04:14	2.9		137		1.14		1.05		0.93		39		1.18		1.366
04:16	3.4		137		1.35		1.26		0.93		45		1.576		1.637
04:18	3.4		137		1.35		1.27		0.94		48		1.573		1.655
04:21	3.3		137		1.31		1.25		0.95		48		1.938		2.088
04:23	3.3		137		1.32		1.24		0.94		49		1.456		1.505
04:24	3.2		137		1.26		1.2		0.95		47		1.415		1.515
04:26	3.2		137		1.29		1.23		0.96		47		1.658		1.645
04:28	3.2		137		1.26		1.19		0.95		46		1.407		1.538
04:30	3.2		137		1.27		1.22		0.96		48		1.475		1.573
04:32	3.4		137		1.35		1.29		0.96		49		1.521		1.505
04:34	3.3		137		1.32		1.24		0.95		45		1.484		1.523
04:36	3.2		139		1.26		1.18		0.94		44		1.35		1.517
04:38	3.3		139		1.33		1.25		0.94		48		1.54		1.605
04:40	3.2		139		1.28		1.2		0.94		46		1.417		1.479
04:42	3.3		139		1.31		1.23		0.94		46		1.509		1.512
04:43	3.2		139		1.27		1.19		0.94		45		1.382		1.547
04:46	2.1		139		0.83		0.77		0.94		30		1.312		1.465
04:47	4.3		139		1.7		1.47		0.86		49		1.11		0.915
04:50	3.6		139		1.43		1.26		0.89		45		1.535		1.606
04:51	3.6		139		1.42		1.27		0.89		47		1.469		1.601
04:53	3.6		139		1.41		1.28		0.91		47		1.482		1.612
04:55	3.4		139		1.35		1.24		0.92		48		1.474		1.577
04:57	3.5		139		1.4		1.3		0.93		49		1.389		1.468
04:59	3.5		139		1.39		1.31		0.94		49		1.476		1.568
05:00	3.4		139		1.35		1.27		0.94		49		1.412		1.47
05:02	3.3		139		1.33		1.25		0.94		49		1.398		1.469
05:04	3.4		139		1.34		1.27		0.95		48		1.405		1.517
05:06	3.5		139		1.39		1.32		0.95		50		1.616		1.625
05:08	3.4		139		1.34		1.26		0.94		47		1.396		1.523
05:09	3.2		141		1.27		1.19		0.94		44		1.316		1.36
05:11	3.5		141		1.39		1.3		0.94		50		1.423		1.492
05:13	3.5		141		1.37		1.3		0.95		50		1.402		1.486
05:14	3.5		141		1.41		1.33		0.94		51		1.312		1.432
05:16	3.4		141		1.34		1.27		0.95		47		1.559		1.697
05:18	3.1		141		1.24		1.16		0.94		45		1.136		1.284
05:19	3.6		141		1.42		1.35		0.95		52		1.364		1.303
05:21	3.3		141		1.31		1.24		0.95		48		1.301		1.394
05:23	3		141		1.2		1.14		0.94		43		1.211		1.319
05:24	3.3		141		1.29		1.22		0.95		47		1.298		1.368
05:26	3.5		141		1.37		1.29		0.94		49		1.407		1.502
05:28	3.6		141		1.43		1.35		0.94		52		1.463		1.551
05:30	3.7		142		1.46		1.39		0.95		53		1.624		1.731
05:32	3.5		142		1.38		1.31		0.95		48		1.52		1.576
05:33	3.4		142		1.36		1.3		0.95		49		1.521		1.642
05:35	3.6		142		1.44		1.38		0.95		53		1.499		1.529
05:37	3.6		142		1.42		1.38		0.97		52		1.507		1.652
05:39	3.6		142		1.43		1.4		0.97		52		1.825		1.883
05:41	3.5		142		1.38		1.33		0.96		49		1.52		1.581
05:42	3.5		142		1.41		1.36		0.97		51		1.41		1.476
05:44	3.6		144		1.44		1.4		0.97		53		1.506		1.602
05:46	3.6		144		1.41		1.38		0.98		53		1.359		1.473
05:47	3.6		144		1.44		1.41		0.98		54		1.431		1.463
05:49	3.8		144		1.51		1.48		0.98		57		1.603		1.677
05:51	3.7		144		1.47		1.47		1		56		1.588		1.69
05:52	3.7		144		1.46		1.48		1.01		57		1.522		1.671
05:54	3.8		144		1.5		1.52		1.01		59		1.564		1.588
05:55	3.7		146		1.46		1.47		1.01		58		1.421		1.471
05:57	3.9		146		1.54		1.58		1.02		62		1.557		1.623
05:58	3.3		146		1.32		1.35		1.02		51		1.286		1.361
06:00	3.4		146		1.34		1.35		1.01		52		1.366		1.396
06:02	3.9		146		1.54		1.54		1		59		1.532		1.598
06:03	3.9		146		1.54		1.55		1.01		60		1.688		1.71
06:05	3.7		146		1.48		1.51		1.02		59		1.666		1.793
06:06	3.7		146		1.49		1.53		1.03		59		1.496		1.608
06:09	3.4		146		1.34		1.38		1.03		49		2.107		2.338
06:11	3.8		146		1.51		1.51		1		57		1.609		1.661
06:12	3.7		146		1.49		1.49		1		57		1.474		1.523
06:14	3.9		146		1.57		1.58		1.01		61		1.583		1.639
06:15	3.8		146		1.52		1.56		1.03		59		1.562		1.711
06:17	3.6		146		1.43		1.46		1.02		57		1.501		1.538
06:18	3.7		146		1.48		1.51		1.02		58		1.462		1.609
06:20	3.6		148		1.44		1.48		1.03		58		1.492		1.549
06:22	3.8		148		1.5		1.54		1.03		58		1.508		1.553
06:23	3.8		148		1.52		1.55		1.03		59		1.565		1.658
06:25	3.8		148		1.52		1.56		1.02		61		1.532		1.597
06:26	3.9		148		1.55		1.61		1.04		62		1.529		1.576
06:28	3.6		148		1.42		1.47		1.04		55		1.515		1.588
06:29	3.7		148		1.46		1.5		1.03		57		1.51		1.496
06:31	3.8		148		1.5		1.56		1.04		59		1.626		1.541
06:33	3.7		148		1.47		1.53		1.04		59		1.558		1.561
06:34	3.6		150		1.45		1.49		1.03		58		1.561		1.531
06:36	3.7		150		1.46		1.5		1.03		57		1.466		1.473
06:37	3.7		150		1.48		1.53		1.03		58		1.431		1.432
06:39	3.4		150		1.34		1.4		1.04		57		1.336		1.406
06:40	3.7		150		1.45		1.51		1.04		60		1.521		1.478
06:42	3.5		150		1.4		1.46		1.04		58		1.425		1.437
06:43	3.5		150		1.41		1.46		1.04		58		1.408		1.45
06:45	3.8		150		1.5		1.56		1.04		63		1.561		1.485
06:46	3.5		150		1.4		1.47		1.05		57		1.582		1.622
06:48	3.8		150		1.51		1.59		1.05		62		1.551		1.552
06:49	3.6		151		1.43		1.5		1.04		60		1.479		1.62
06:51	3.9		151		1.54		1.61		1.04		64		1.528		1.505
06:52	3.7		151		1.47		1.54		1.05		62		1.505		1.516
06:54	3.8		151		1.52		1.62		1.06		65		1.546		1.559
06:55	3.5		153		1.39		1.46		1.06		58		1.462		1.5
06:57	3.6		153		1.43		1.5		1.05		59		1.447		1.491
06:58	3.5		153		1.39		1.48		1.06		60		1.37		1.436
06:59	3.6		150		1.45		1.53		1.06		60		1.536		1.551
07:01	3.8		150		1.52		1.61		1.06		64		1.533		1.492
07:02	3.5		150		1.41		1.5		1.07		61		1.488		1.564
07:04	3.3		150		1.31		1.41		1.07		57		1.351		1.487
07:05	3.5		153		1.37		1.47		1.07		57		1.427		1.547
07:07	3.4		153		1.34		1.43		1.07		57		1.399		1.481
07:08	3.7		153		1.46		1.57		1.08		63		1.508		1.596
07:10	3.5		153		1.38		1.48		1.08		60		1.448		1.431
07:11	3.6		153		1.42		1.52		1.07		60		1.449		1.425
07:13	3.4		153		1.33		1.42		1.07		56		1.437		1.495
07:14	3.7		153		1.48		1.58		1.07		62		1.516		1.525
07:15	3.8		155		1.51		1.61		1.07		63		1.501		1.474
07:17	3.4		155		1.36		1.46		1.07		57		1.476		1.523
07:19	3.3		155		1.3		1.4		1.08		54		1.388		1.498
07:20	3.5		153		1.41		1.51		1.07		60		1.47		1.511
07:22	3.3		153		1.33		1.43		1.08		56		1.408		1.55
07:23	3.5		153		1.39		1.5		1.08		59		1.468		1.479
07:24	3.6		155		1.41		1.54		1.09		62		1.446		1.505
07:26	3.6		155		1.45		1.56		1.08		60		1.496		1.482
07:27	3.6		155		1.42		1.54		1.08		61		1.481		1.581
07:29	3.7		155		1.45		1.59		1.09		63		1.491		1.482
07:30	3.5		153		1.41		1.53		1.09		60		1.482		1.511
07:32	3.3		153		1.3		1.42		1.09		57		1.423		1.588
07:33	3.4		153		1.36		1.48		1.09		59		1.414		1.469
07:35	3.6		153		1.42		1.53		1.08		60		1.48		1.569
07:36	3.6		153		1.45		1.57		1.08		62		1.486		1.533
07:38	3.7		153		1.46		1.59		1.09		63		1.52		1.589
07:39	3.6		153		1.41		1.53		1.08		59		1.518		1.56
07:41	3.5		155		1.4		1.51		1.08		60		1.418		1.57
07:42	3.3		155		1.33		1.45		1.09		58		1.359		1.547
07:43	3.6		155		1.45		1.59		1.1		63		1.562		1.537
07:45	3.6		155		1.41		1.56		1.1		61		1.501		1.602
07:46	3.5		155		1.39		1.53		1.1		61		1.557		1.632
07:48	3.6		155		1.44		1.58		1.1		61		1.565		1.538
07:49	3.9		155		1.55		1.7		1.1		67		1.592		1.658
07:51	3.6		155		1.43		1.58		1.1		63		1.584		1.566
07:52	3.5		155		1.4		1.54		1.1		61		1.494		1.587
07:54	3.4		155		1.35		1.49		1.1		60		1.476		1.534
07:55	3.5		155		1.41		1.55		1.1		61		1.513		1.58
07:57	3.5		155		1.39		1.54		1.1		60		1.474		1.541
07:58	3.5		155		1.38		1.53		1.1		61		1.507		1.578
08:00	3.3		155		1.32		1.45		1.1		59		1.404		1.485
08:01	3.6		155		1.45		1.6		1.1		62		1.587		1.531
08:03	3.7		155		1.46		1.61		1.1		63		1.452		1.49
08:04	3.4		155		1.35		1.49		1.11		60		1.452		1.522
08:06	3.1		155		1.24		1.37		1.1		57		1.364		1.467
08:07	3.6		155		1.43		1.58		1.11		62		1.541		1.534
08:08	3.3		155		1.31		1.44		1.1		59		1.396		1.525
08:10	3.4		155		1.36		1.51		1.11		60		1.466		1.581
08:11	3.3		155		1.3		1.45		1.11		58		1.4		1.521
08:13	3.6		155		1.43		1.61		1.12		63		1.594		1.63
08:14	3.4		155		1.33		1.48		1.11		59		1.473		1.55
08:16	3.2		155		1.28		1.43		1.11		56		1.374		1.547
08:17	3.3		155		1.3		1.44		1.11		58		1.388		1.515
08:19	3.4		155		1.36		1.5		1.11		59		1.451		1.542
08:20	3.4		155		1.35		1.5		1.11		59		1.465		1.552
08:22	3.4		155		1.37		1.52		1.11		61		1.457		1.564
08:23	3.4		155		1.34		1.49		1.11		60		1.404		1.524
08:25	3.4		157		1.37		1.52		1.11		61		1.482		1.567
08:26	3.2		157		1.27		1.42		1.12		57		1.452		1.625
08:27	3.2		157		1.28		1.43		1.12		58		1.382		1.54
08:29	3.3		157		1.31		1.48		1.13		61		1.382		1.457
08:30	3.2		155		1.28		1.44		1.12		59		1.397		1.567
08:32	3.6		155		1.45		1.63		1.13		65		1.434		1.442
08:33	3.3		155		1.3		1.46		1.12		61		1.307		1.509
08:35	2.7		155		1.06		1.17		1.1		44		1.238		1.342
08:36	3.7		155		1.46		1.61		1.11		64		1.279		1.512
08:37	2.8		155		1.1		1.18		1.08		45		1.108		0.941
08:39	3.9		155		1.56		1.68		1.07		60		1.566		1.566
08:40	4.1		157		1.63		1.75		1.07		66		1.565		1.534
08:42	3.3		157		1.32		1.43		1.09		56		1.297		1.433
08:43	3.6		157		1.44		1.57		1.09		63		1.391		1.485
08:44	3.5		155		1.4		1.55		1.1		62		1.472		1.535
08:46	2.8		155		1.1		1.21		1.1		47		1.437		1.564
08:48	3.4		155		1.36		1.48		1.09		56		1.354		1.489
08:49	3.3		155		1.29		1.4		1.08		54		1.315		1.498
08:50	3.3		155		1.32		1.43		1.09		58		1.316		1.534
08:52	3.5		155		1.38		1.52		1.1		60		1.338		1.413
08:53	3.2		155		1.29		1.42		1.11		58		1.327		1.535
08:55	3.5		155		1.4		1.57		1.12		62		1.493		1.572
08:56	3.3		155		1.32		1.47		1.11		58		1.399		1.591
08:57	3.3		155		1.31		1.47		1.12		61		1.369		1.572
08:59	3.6		155		1.43		1.6		1.12		64		1.364		1.416
09:00	3.2		155		1.27		1.41		1.12		58		1.291		1.486
09:01	3.3		155		1.32		1.49		1.13		60		1.341		1.525
09:03	3.2		155		1.26		1.41		1.12		58		1.344		1.517
09:05	3.1		157		1.25		1.4		1.12		53		1.604		1.806
09:06	3.3		157		1.32		1.46		1.1		58		1.294		1.449
09:07	3.1		157		1.25		1.39		1.11		55		1.256		1.414
09:09	3.2		157		1.28		1.42		1.1		57		1.274		1.425
09:10	3.1		157		1.24		1.37		1.1		55		1.257		1.467
09:11	3.1		157		1.24		1.37		1.11		56		1.197		1.456
09:13	3		157		1.2		1.34		1.11		55		1.152		1.376
09:14	3.2		157		1.28		1.43		1.12		56		1.276		1.488
09:15	3.6		160		1.43		1.62		1.13		67		1.377		1.351
09:16	3.2		160		1.28		1.44		1.13		59		1.289		1.407
09:18	3.8		160		1.5		1.69		1.13		68		1.27		1.247
09:19	3.5		160		1.41		1.6		1.14		62		1.394		1.486
09:20	3.5		160		1.4		1.6		1.14		65		1.302		1.326
09:21	3.1		160		1.23		1.4		1.14		59		1.176		1.483
09:23	3.5		160		1.38		1.58		1.14		64		1.331		1.338
09:24	3.5		160		1.41		1.6		1.14		63		1.364		1.441
09:25	3.6		160		1.41		1.62		1.15		64		1.352		1.409
09:25	Recovery
09:26	3.2		160		1.29		1.47		1.14		60		1.283		1.413
09:28	3.2		160		1.28		1.45		1.13		60		1.31		1.531
09:29	3		160		1.17		1.33		1.13		51		1.121		1.306
09:31	3.2		160		1.26		1.44		1.14		54		1.382		1.545
09:32	3		160		1.21		1.39		1.15		57		1.402		1.65
09:34	3.1		160		1.22		1.42		1.16		59		1.504		1.595
09:35	3.2		160		1.26		1.46		1.16		58		1.485		1.587
09:37	3.3		160		1.3		1.51		1.16		61		1.577		1.607
09:38	3		160		1.2		1.39		1.16		57		1.488		1.638
09:40	3.1		160		1.24		1.45		1.17		60		1.431		1.578
09:41	3.2		160		1.27		1.46		1.15		62		1.438		1.524
09:42	3.1		160		1.25		1.45		1.16		60		1.407		1.467
09:44	3.2		160		1.27		1.47		1.16		60		1.446		1.56
09:45	3.2		157		1.29		1.49		1.15		61		1.429		1.513
09:47	3.1		157		1.21		1.4		1.15		58		1.369		1.466
09:48	2.6		157		1.04		1.19		1.14		50		1.244		1.563
09:50	3		157		1.21		1.39		1.15		56		1.405		1.514
09:51	3.3		157		1.32		1.53		1.16		62		1.432		1.541
09:52	2.9		157		1.16		1.33		1.15		55		1.274		1.387
09:54	3.3		157		1.31		1.49		1.14		60		1.398		1.442
09:55	3		155		1.19		1.37		1.15		56		1.382		1.489
09:57	3		155		1.21		1.38		1.15		56		1.403		1.514
09:58	3.3		155		1.32		1.5		1.14		61		1.438		1.519
10:00	3.5		155		1.39		1.58		1.14		65		1.459		1.4
10:01	3.2		155		1.27		1.45		1.14		59		1.351		1.359
10:03	3.1		155		1.24		1.42		1.14		57		1.499		1.566
10:04	3.2		155		1.27		1.44		1.14		57		1.441		1.505
10:05	3.4		155		1.37		1.54		1.13		62		1.448		1.482
10:07	3.3		155		1.3		1.47		1.12		59		1.502		1.509
10:08	3.3		155		1.32		1.47		1.12		62		1.366		1.417
10:10	3.4		155		1.35		1.52		1.12		64		1.396		1.318
10:11	3.4		155		1.35		1.54		1.13		63		1.595		1.532
10:13	3.3		155		1.33		1.51		1.13		62		1.527		1.45
10:14	3.1		155		1.21		1.35		1.11		56		1.088		1.189
10:15	3.4		153		1.34		1.49		1.11		61		1.312		1.297
10:17	3.1		153		1.24		1.4		1.13		57		1.377		1.481
10:18	3.3		153		1.3		1.46		1.12		62		1.393		1.415
10:19	3.3		153		1.3		1.46		1.12		62		1.509		1.502
10:21	3		153		1.2		1.34		1.12		57		1.419		1.532
10:22	2.9		153		1.14		1.28		1.12		55		1.273		1.418
10:24	3.1		153		1.22		1.37		1.12		58		1.287		1.31
10:25	3		153		1.19		1.33		1.12		56		1.382		1.433
10:27	3.1		153		1.22		1.37		1.12		57		1.397		1.526
10:28	2.9		153		1.13		1.27		1.12		55		1.293		1.417
10:29	2.6		150		1.04		1.15		1.11		48		1.158		1.347
10:31	2.2		150		0.87		0.98		1.13		44		1.126		1.529
10:34			150						1.13
10:49			148
11:05			146
11:21			142
11:37			139
11:52			131
12:08			127
12:24			122
12:40			117
12:56			115
13:11			115
13:27			113
13:43			115
13:59			115
14:14			114
14:30			114
14:46			112
15:01			110
15:17			111
15:33			110
15:49			112
16:04			112
16:20			112
16:36			111
16:52			110
17:07			110
	3.23778	0.214494	142.302	207.553	1.28685	0.0338325	1.29824	0.0749798	0.999972	0.0143872	50.517	138.262	1.37448	0.041384	1.44655	0.047821
	METS						HR						VO2						VCO2						RER						VE						Vtex						Vtin						LABEL
	Rest		Test		Recovery		Rest		Test		Recovery		Rest		Test		Recovery		Rest		Test		Recovery		Rest		Test		Recovery		Rest		Test		Recovery		Rest		Test		Recovery		Rest		Test		Recovery
	MEDIA	VAR	MEDIA	VAR	MEDIA	VAR	MEDIA	VAR	MEDIA	VAR	MEDIA	VAR	MEDIA	VAR	MEDIA	VAR	MEDIA	VAR	MEDIA	VAR	MEDIA	VAR	MEDIA	VAR	MEDIA	VAR	MEDIA	VAR	MEDIA	VAR	MEDIA	VAR	MEDIA	VAR	MEDIA	VAR	MEDIA	VAR	MEDIA	VAR	MEDIA	VAR	MEDIA	VAR	MEDIA	VAR	MEDIA	VAR	BIN
	1.14615	0.0626923	3.25523	0.236448	3.12174	0.054628	111.333	0.606061	142.085	171.639	143.222	363.696	0.457692	0.0113026	1.29379	0.0372682	1.24065	0.00878845	0.36	0.00866667	1.28114	0.0822698	1.41196	0.0120294	0.784615	0.00126026	0.978922	0.013226	1.13702	0.0002605	14.8462	10.4744	49.3791	146.669	58.087	16.97	0.611308	0.0334062	1.37311	0.0457364	1.38361	0.0127056	0.58125	0.0296013	1.44217	0.0534764	1.47572	0.00955247	1
	1.14615	0.0626923	3.25523	0.236448	3.12174	0.054628	111.333	0.606061	142.085	171.639	143.222	363.696	0.457692	0.0113026	1.29379	0.0372682	1.24065	0.00878845	0.36	0.00866667	1.28114	0.0822698	1.41196	0.0120294	0.784615	0.00126026	0.978922	0.013226	1.13702	0.0002605	14.8462	10.4744	49.3791	146.669	58.087	16.97	0.611308	0.0334062	1.37311	0.0457364	1.38361	0.0127056	0.58125	0.0296013	1.44217	0.0534764	1.47572	0.00955247	1
[truncated: 1 more columns]
