# Supplementary material for: On the development of diagnostic support algorithms based on CPET biosignals data via machine learning and wavelets
Source: PeerJ journal article supplement (doi:10.7717/peerj-cs.2474), 2025-01-30
Supplement: raw_data.zip [file Subject28_BxB.xlsx]

## Sheet: Demographics
Gender:	female
Age:	51
Height (cm):	170
Weight (kg):	112.9
BMI:	39
Condition:	Metabolic Syndrome

## Sheet: Subject28_BxB
Time	METS		HR		V'O2		V'CO2		RER		V'E		VTex		VTin
min			1/min		L/min		L/min				L/min		L		L
00:00	Rest
00:27
00:43			86
00:59			76
01:14			82
01:30			80
01:46			78
02:02			76
02:16	0.5		75		0.18		0.14		0.78		5		1.262		0.721
02:19	1.2		75		0.49		0.39		0.8		13		0.652		0.708
02:22	1.1		75		0.43		0.34		0.8		11		0.635		0.611
02:26	1		78		0.39		0.32		0.8		11		0.603		0.655
02:29	1		78		0.38		0.31		0.81		10		0.608		0.656
02:32	1		75		0.41		0.33		0.81		11		0.609		0.626
02:35	1		75		0.39		0.33		0.83		12		0.533		0.647
02:37	1.4		75		0.56		0.44		0.8		16		0.512		0.452
02:40	1.1		79		0.43		0.36		0.83		13		0.563		0.592
02:43	0.9		79		0.37		0.3		0.82		10		0.621		0.56
02:46	1		81		0.4		0.32		0.81		11		0.58		0.591
02:50	1		81		0.39		0.31		0.82		11		0.618		0.61
02:54	0.9		81		0.37		0.3		0.81		10		0.677		0.676
02:57	1.2		81		0.49		0.38		0.78		13		0.642		0.577
02:57	Test
03:00	1.1		82		0.43		0.35		0.81		12		0.586		0.686
03:03	1.3		82		0.5		0.42		0.84		14		0.671		0.742
03:05	1.5		83		0.58		0.51		0.87		18		0.651		0.66
03:07	1.6		84		0.62		0.55		0.89		19		0.76		0.764
03:09	1.6		84		0.62		0.54		0.88		19		0.63		0.695
03:14	1.8		88		0.73		0.67		0.93		21		1.603		1.629
03:16	1.5		96		0.6		0.52		0.87		17		0.656		0.63
03:18	1.7		96		0.65		0.54		0.82		17		0.693		0.709
03:21	1.5		93		0.61		0.48		0.79		16		0.591		0.65
03:23	1.9		93		0.76		0.57		0.76		19		0.609		0.64
03:25	2		96		0.8		0.61		0.77		19		0.791		0.806
03:27	2.2		96		0.86		0.66		0.77		21		0.79		0.797
03:29	2.1		103		0.85		0.65		0.77		21		0.709		0.735
03:32	2.3		103		0.89		0.7		0.78		22		0.86		0.908
03:34	2.2		103		0.88		0.68		0.78		22		0.812		0.763
03:36	2.2		105		0.87		0.67		0.77		22		0.784		0.815
03:38	2.3		105		0.92		0.7		0.77		23		0.824		0.808
03:40	2.4		105		0.93		0.71		0.76		23		0.826		0.813
03:42	2.4		105		0.93		0.7		0.76		23		0.792		0.841
03:44	2.4		105		0.93		0.7		0.75		24		0.719		0.753
03:46	2.5		105		0.99		0.74		0.74		24		0.792		0.753
03:49	2.4		105		0.95		0.71		0.75		22		0.832		0.916
03:51	2.5		105		1		0.73		0.74		24		0.855		0.849
03:53	2.5		105		0.98		0.72		0.73		23		0.796		0.862
03:55	2.1		104		0.83		0.6		0.72		20		0.867		0.797
03:58	2.9		104		1.16		0.83		0.71		25		0.901		0.921
04:00	2.8		106		1.1		0.8		0.73		25		0.904		0.967
04:02	2.7		106		1.05		0.78		0.74		27		0.902		0.93
04:03	2.7		106		1.06		0.8		0.76		27		0.803		0.857
04:05	2.6		106		1.02		0.79		0.78		28		0.809		0.862
04:07	2.9		106		1.14		0.89		0.78		29		0.899		0.9
04:09	2.6		106		1.01		0.77		0.76		25		0.853		0.877
04:11	2.7		107		1.07		0.8		0.75		26		0.833		0.801
04:13	2.7		107		1.07		0.8		0.75		26		0.887		0.896
04:15	2.8		106		1.12		0.84		0.75		27		0.91		0.974
04:17	1.5		106		0.58		0.44		0.76		18		0.491		0.998
04:21	3		103		1.2		0.83		0.7		23		1.695		1.142
04:23	3.2		103		1.28		0.89		0.7		27		0.968		1.093
04:26	3.2		106		1.28		0.93		0.72		29		1.036		1.088
04:28	3.2		106		1.28		0.95		0.74		30		0.974		1.067
04:30	3.1		109		1.22		0.91		0.74		29		0.951		0.96
04:31	3.1		109		1.21		0.9		0.74		29		0.893		0.866
04:33	3		109		1.2		0.89		0.74		28		0.848		0.947
04:35	3.2		111		1.26		0.94		0.74		32		0.941		0.92
04:37	2.9		111		1.16		0.86		0.74		29		0.783		0.837
04:38	3		111		1.19		0.9		0.76		31		0.832		1.001
04:40	2.5		112		0.99		0.75		0.75		23		0.704		0.785
04:41	3.3		112		1.32		0.99		0.76		32		0.745		0.842
04:43	2.6		112		1.03		0.79		0.77		29		0.605		0.821
04:45	1.6		112		0.64		0.45		0.71		16		0.556		0.316
04:47	3.8		112		1.51		1.08		0.71		32		1.011		1.126
04:49	3.5		112		1.38		1.01		0.73		32		0.946		1.081
04:51	2.7		112		1.06		0.8		0.75		25		1.219		1.126
04:53	3.8		112		1.5		1.11		0.74		33		1.083		1.089
04:55	3.5		114		1.4		1.04		0.75		32		0.991		1.057
04:57	3.2		114		1.28		1		0.78		31		1.127		1.214
04:59	3.5		116		1.39		1.11		0.8		35		1.153		1.216
05:01	3.4		116		1.35		1.08		0.8		34		1.017		1.11
05:03	3.2		116		1.26		1.01		0.8		32		0.978		1.011
05:05	3.3		118		1.29		1.02		0.8		33		1.03		1.032
05:07	3.3		118		1.28		1.02		0.79		33		0.909		1.006
05:08	3.3		118		1.3		1.04		0.8		33		0.875		0.979
05:10	2.8		118		1.11		0.88		0.79		28		0.835		0.829
05:11	1.1		118		0.45		0.32		0.72		12		0.26		0.29
05:13	3.6		118		1.44		1.04		0.72		32		0.843		0.934
05:15	3.8		116		1.52		1.12		0.73		34		0.987		0.953
05:16	3.7		116		1.45		1.11		0.77		36		1.06		1.164
05:18	3.7		116		1.48		1.18		0.79		37		1.132		1.127
05:20	3.4		115		1.34		1.09		0.82		34		1.065		1.122
05:22	3.3		115		1.29		1.06		0.82		33		1.108		1.085
05:24	3.3		115		1.3		1.06		0.81		33		1.065		1.11
05:26	3.3		115		1.31		1.07		0.81		34		1.044		1.105
05:28	3.4		115		1.34		1.09		0.81		34		1.061		1.045
05:30	3.3		116		1.3		1.08		0.82		34		1.033		1.128
05:31	3.2		116		1.28		1.08		0.84		33		1.071		1.114
05:33	3.4		116		1.36		1.14		0.84		35		1.122		1.095
05:35	3.2		115		1.26		1.05		0.83		33		1.042		1.063
05:37	3.3		115		1.3		1.08		0.84		33		1.14		1.19
05:39	3.3		115		1.32		1.1		0.83		33		1.078		1.168
05:41	3.3		115		1.32		1.09		0.83		33		1.11		1.121
05:43	3.3		115		1.31		1.07		0.81		32		1.027		1.053
05:45	3.4		116		1.32		1.08		0.82		33		1.031		1.095
05:47	3.5		116		1.39		1.13		0.82		35		1.07		1.053
05:49	3.4		116		1.34		1.1		0.83		33		1.083		1.157
05:51	3.4		117		1.34		1.1		0.82		33		0.922		1.024
05:52	3.6		117		1.41		1.16		0.82		36		1.021		1.052
05:54	3.5		117		1.4		1.15		0.82		35		1.047		1.081
05:56	3.7		118		1.47		1.22		0.83		37		1.11		1.145
05:58	3.6		118		1.42		1.2		0.84		37		1.145		1.168
05:59	3.4		118		1.34		1.12		0.84		34		0.994		1.089
06:01	3.6		118		1.41		1.18		0.83		37		1.096		1.044
06:03	3.6		118		1.42		1.19		0.84		35		1.103		1.184
06:05	3.5		120		1.38		1.15		0.83		35		1.022		1.086
06:06	3.3		120		1.3		1.05		0.81		33		0.902		0.902
06:08	3.6		120		1.41		1.15		0.82		35		1.001		1.076
06:10	3.6		120		1.4		1.16		0.82		35		1.069		1.117
06:12	3.7		120		1.44		1.19		0.83		36		1.081		1.13
06:14	3.4		120		1.36		1.12		0.82		35		0.996		1.018
06:15	3.7		120		1.48		1.23		0.83		38		1.09		1.127
06:17	3.6		120		1.42		1.19		0.84		37		0.933		0.999
06:18	3.6		120		1.4		1.18		0.84		37		0.927		0.966
06:20	3.7		120		1.46		1.24		0.85		38		0.998		1.02
06:22	3.6		120		1.42		1.2		0.85		37		1.069		1.073
06:24	2.8		122		1.1		0.93		0.84		27		1.216		1.209
06:26	4.1		122		1.6		1.29		0.81		38		1.212		1.219
06:28	3.9		122		1.54		1.27		0.82		38		1.127		1.241
06:30	3.9		123		1.53		1.3		0.85		40		1.21		1.256
06:32	3.7		123		1.45		1.25		0.86		38		1.154		1.17
06:33	3.6		123		1.42		1.22		0.86		37		1.031		1.118
06:35	3.5		123		1.38		1.19		0.86		38		1.031		1.04
06:37	3.6		123		1.43		1.23		0.86		38		1.105		1.144
06:38	3.6		123		1.41		1.21		0.85		36		1.125		1.127
06:40	3.5		123		1.39		1.19		0.86		36		1.041		1.146
06:42	3.6		123		1.44		1.23		0.85		37		1.117		1.062
06:44	3.7		123		1.45		1.25		0.86		37		1.123		1.193
06:46	3.6		122		1.43		1.24		0.87		38		1.1		1.202
06:47	3.7		122		1.46		1.26		0.87		38		1.078		1.108
06:49	3.5		122		1.4		1.23		0.88		38		1.159		1.216
06:51	3.8		121		1.5		1.31		0.88		40		1.136		1.117
06:52	3.6		121		1.43		1.24		0.87		38		1.042		1.081
06:54	3.5		121		1.39		1.21		0.87		37		0.978		1.11
06:56	3.6		121		1.42		1.24		0.88		38		0.973		1.023
06:57	3.6		121		1.42		1.24		0.87		38		1.009		1.036
06:59	3.6		121		1.42		1.24		0.87		39		1.111		1.097
07:01	3.6		122		1.42		1.24		0.87		38		1.052		1.116
07:02	3.5		122		1.39		1.22		0.88		37		0.998		1.071
07:04	3.8		122		1.49		1.31		0.88		41		1.103		1.074
07:06	3.3		121		1.31		1.15		0.88		34		1.184		1.171
07:08	3.7		121		1.47		1.27		0.86		38		1.151		1.142
07:10	3.6		121		1.43		1.23		0.86		36		1.093		1.169
07:11	3.8		121		1.49		1.3		0.87		40		1.143		1.195
07:13	3.7		121		1.46		1.29		0.88		41		1.072		1.097
07:14	3.6		121		1.42		1.25		0.88		39		1.082		1.116
07:16	3.6		121		1.43		1.28		0.89		40		1.16		1.199
07:18	3.6		121		1.42		1.27		0.89		38		1.131		1.165
07:20	3.6		122		1.4		1.27		0.9		38		1.164		1.254
07:21	3.8		122		1.5		1.35		0.9		42		1.138		1.192
07:23	3.6		122		1.43		1.28		0.9		39		1.163		1.128
07:25	3.7		123		1.46		1.31		0.9		40		1.17		1.224
07:27	3.6		123		1.42		1.29		0.91		40		1.074		1.202
07:28	3.7		123		1.48		1.34		0.91		41		1.07		1.137
07:30	3.6		123		1.43		1.31		0.91		40		1.119		1.131
07:32	3.6		123		1.41		1.27		0.9		40		1.097		1.12
07:33	3.7		123		1.45		1.31		0.9		39		1.108		1.134
07:35	3.6		125		1.44		1.3		0.91		40		1.134		1.191
07:36	3.8		125		1.5		1.35		0.9		42		1.115		1.129
07:38	3.6		125		1.42		1.3		0.91		41		1.129		1.152
07:40	3.5		125		1.4		1.26		0.9		39		1.054		1.086
07:42	3.6		125		1.42		1.29		0.9		39		1.128		1.229
07:43	3.8		125		1.48		1.35		0.91		41		1.301		1.25
07:46	3.5		126		1.38		1.25		0.91		37		1.29		1.392
07:48	3.7		126		1.47		1.32		0.9		38		1.331		1.408
07:49	3.7		126		1.47		1.32		0.9		42		1.246		1.31
07:51	3.7		126		1.46		1.34		0.91		40		1.289		1.341
07:53	3.6		126		1.42		1.3		0.92		39		1.253		1.336
07:55	3.8		127		1.5		1.37		0.91		41		1.198		1.291
07:57	3.9		127		1.53		1.39		0.91		42		1.246		1.262
07:59	3.6		127		1.42		1.3		0.91		40		1.207		1.31
08:00	3.8		127		1.5		1.38		0.92		40		1.186		1.254
08:02	3.8		127		1.52		1.39		0.91		41		1.273		1.271
08:04	3.7		129		1.47		1.37		0.93		40		1.291		1.417
08:06	3.5		129		1.38		1.28		0.92		37		1.207		1.309
08:08	4.2		129		1.64		1.51		0.92		43		1.22		1.3
08:09	4		129		1.59		1.48		0.93		44		1.181		1.251
08:11	4		129		1.6		1.5		0.94		46		1.203		1.28
08:13	3.9		129		1.53		1.45		0.95		44		1.155		1.239
08:14	4		129		1.56		1.49		0.95		45		1.345		1.344
08:16	3.9		129		1.53		1.46		0.95		43		1.316		1.376
08:18	3.8		129		1.5		1.41		0.94		41		1.266		1.333
08:20	3.8		129		1.49		1.41		0.94		42		1.267		1.383
08:22	4		129		1.56		1.47		0.94		43		1.32		1.36
08:24	3.9		129		1.53		1.44		0.94		43		1.305		1.385
08:26	3.8		130		1.48		1.39		0.94		39		1.34		1.378
08:27	4		130		1.58		1.47		0.93		43		1.32		1.367
08:29	4		129		1.58		1.49		0.95		45		1.372		1.456
08:31	3.9		129		1.55		1.46		0.94		44		1.318		1.352
08:33	3.9		129		1.55		1.47		0.95		43		1.323		1.386
08:35	3.9		130		1.56		1.47		0.94		43		1.288		1.332
08:36	3.9		130		1.53		1.44		0.94		43		1.24		1.318
08:38	3.9		130		1.52		1.44		0.94		41		1.197		1.314
08:40	3.8		131		1.52		1.42		0.93		42		1.201		1.243
08:42	3.9		131		1.54		1.44		0.94		42		1.218		1.308
08:44	3.7		131		1.47		1.43		0.97		38		1.628		1.802
08:46	3.9		131		1.54		1.43		0.93		41		1.097		1.144
08:47	3.9		131		1.54		1.39		0.91		41		1.052		1.108
08:49	2.9		130		1.15		1.01		0.87		29		0.846		1.022
08:51	4.7		130		1.84		1.63		0.89		46		1.197		1.239
08:52	4.2		130		1.66		1.48		0.9		44		1.136		1.238
08:54	4.3		130		1.71		1.56		0.92		45		1.238		1.311
08:56	4.3		131		1.7		1.59		0.93		47		1.29		1.364
08:57	4.2		131		1.67		1.59		0.95		48		1.3		1.286
08:59	3.9		131		1.54		1.46		0.95		43		1.234		1.29
09:01	4.1		131		1.61		1.52		0.94		45		1.205		1.268
09:02	4.2		131		1.65		1.56		0.95		45		1.245		1.295
09:04	4		131		1.59		1.51		0.95		43		1.22		1.301
09:06	3.5		133		1.4		1.33		0.95		37		1.498		1.352
09:08	4.6		133		1.8		1.64		0.91		46		1.481		1.567
09:10	4.5		134		1.77		1.64		0.92		49		1.345		1.421
09:12	4.4		134		1.74		1.64		0.94		47		1.389		1.468
09:13	4.3		134		1.68		1.62		0.96		47		1.385		1.469
09:15	4.1		136		1.64		1.57		0.96		46		1.335		1.366
09:17	4		136		1.57		1.5		0.96		46		1.212		1.327
09:18	3		136		1.17		1.09		0.93		32		0.815		0.853
09:20	4.5		137		1.79		1.64		0.91		46		1.222		1.267
09:22	4.3		137		1.71		1.58		0.93		45		1.296		1.369
09:23	4.6		137		1.83		1.71		0.94		49		1.34		1.418
09:25	4.5		137		1.77		1.69		0.96		48		1.378		1.487
09:27	4.6		137		1.8		1.73		0.96		50		1.402		1.444
09:28	4.2		137		1.65		1.59		0.96		47		1.347		1.382
09:30	4.2		137		1.66		1.6		0.96		45		1.271		1.336
09:32	4.3		137		1.71		1.63		0.96		47		1.374		1.426
09:34	4.2		137		1.66		1.58		0.95		45		1.42		1.448
09:35	4.6		139		1.8		1.72		0.96		49		1.403		1.504
09:37	4.6		139		1.8		1.73		0.96		48		1.381		1.497
09:39	4.5		139		1.79		1.72		0.96		49		1.365		1.434
09:41	4.5		139		1.77		1.7		0.96		48		1.341		1.411
09:42	4.4		139		1.74		1.71		0.98		47		1.448		1.597
09:44	4.4		141		1.74		1.69		0.97		46		1.413		1.468
09:46	4.3		141		1.69		1.63		0.97		46		1.38		1.476
09:48	4.5		141		1.77		1.71		0.96		46		1.344		1.444
09:50	4.6		141		1.81		1.75		0.97		47		1.494		1.588
09:52	4.2		141		1.65		1.61		0.97		45		1.383		1.504
09:53	4.6		141		1.82		1.75		0.96		48		1.435		1.488
09:55	4.6		141		1.8		1.75		0.97		49		1.417		1.53
09:57	4.6		141		1.81		1.77		0.97		48		1.445		1.542
09:59	4.6		141		1.81		1.76		0.98		48		1.409		1.509
10:00	4.6		142		1.82		1.79		0.99		50		1.483		1.614
10:02	4.5		142		1.78		1.76		0.99		48		1.398		1.528
10:04	4.5		142		1.79		1.76		0.98		48		1.483		1.543
10:06	4.6		142		1.8		1.8		1		49		1.531		1.672
10:08	4.2		142		1.67		1.65		0.98		43		1.497		1.559
10:10	4.7		142		1.85		1.81		0.98		49		1.59		1.623
10:12	4.6		142		1.84		1.81		0.98		49		1.507		1.641
10:13	4.9		142		1.92		1.89		0.98		54		1.376		1.462
10:15	4.6		142		1.82		1.8		0.99		51		1.446		1.535
10:17	4.6		142		1.84		1.83		1		53		1.439		1.549
10:18	4.7		142		1.87		1.88		1.01		53		1.472		1.53
10:20	4.4		144		1.76		1.76		1		49		1.431		1.493
10:22	4.6		144		1.81		1.79		0.99		50		1.469		1.519
10:24	4.7		144		1.85		1.82		0.98		50		1.432		1.491
10:26	4.1		146		1.62		1.64		1.01		41		1.885		2.133
10:28	4.7		146		1.84		1.79		0.97		46		1.459		1.546
10:30	4.8		146		1.91		1.82		0.95		49		1.416		1.551
10:31	4.8		146		1.88		1.83		0.97		51		1.311		1.453
10:33	4.9		146		1.93		1.88		0.97		53		1.204		1.263
10:34	4.3		144		1.71		1.65		0.96		46		1.111		1.147
10:36	4.7		144		1.88		1.8		0.96		50		1.303		1.439
10:38	4.8		144		1.9		1.84		0.97		50		1.414		1.421
10:39	4.8		144		1.88		1.82		0.97		52		1.346		1.463
10:41	4.7		146		1.87		1.82		0.98		50		1.362		1.387
10:42	4.7		146		1.85		1.81		0.98		49		1.46		1.553
10:44	4.5		146		1.79		1.76		0.98		47		1.465		1.529
10:46	4.9		146		1.93		1.88		0.98		52		1.404		1.524
10:48	4.9		146		1.94		1.91		0.98		53		1.439		1.496
10:49	4.9		146		1.92		1.9		0.99		51		1.431		1.559
10:51	5		146		1.97		1.95		0.99		54		1.334		1.446
10:52	4.8		146		1.9		1.9		1		52		1.412		1.507
10:54	4		148		1.57		1.55		0.99		43		1.285		1.39
10:56	5.1		148		2.02		1.99		0.99		55		1.473		1.488
10:57	4.9		148		1.95		1.95		1		55		1.428		1.507
10:59	4.8		148		1.9		1.9		1		52		1.507		1.623
11:01	4.7		148		1.87		1.88		1		52		1.376		1.504
11:02	4.6		148		1.82		1.82		1		49		1.435		1.511
11:04	4.9		148		1.93		1.92		0.99		52		1.443		1.512
11:06	4.9		148		1.93		1.93		1		53		1.461		1.541
11:07	4.8		148		1.9		1.9		1		53		1.361		1.512
11:09	5.1		148		2		2.03		1.01		56		1.447		1.469
11:10	4.7		148		1.88		1.9		1.01		53		1.375		1.511
11:12	4.7		148		1.85		1.86		1		51		1.388		1.522
11:13	4.6		148		1.82		1.81		0.99		51		1.257		1.348
11:15	5		151		1.98		1.98		1		55		1.433		1.506
11:17	4.9		151		1.94		1.97		1.02		54		1.566		1.658
11:19	4.3		151		1.7		1.67		0.99		45		1.556		1.58
11:21	5.4		151		2.14		2.12		0.99		57		1.647		1.745
11:21	Recovery
11:23	4.8		151		1.9		1.92		1.01		52		1.684		1.786
11:25	4.6		151		1.82		1.85		1.02		49		1.749		1.91
11:26	4.8		151		1.9		1.91		1.01		52		1.55		1.6
11:28	4.6		151		1.83		1.85		1.01		51		1.545		1.658
11:30	4.5		150		1.79		1.8		1		48		1.474		1.612
11:32	4.8		150		1.91		1.91		1		52		1.563		1.645
11:34	4.4		150		1.75		1.74		1		46		1.508		1.62
11:36	4.5		148		1.77		1.75		0.99		45		1.503		1.612
11:38	4.7		148		1.85		1.83		0.99		48		1.527		1.64
11:40	4.6		146		1.84		1.81		0.99		46		1.494		1.637
11:42	4.7		146		1.87		1.87		1		48		1.536		1.723
11:44	4.3		146		1.71		1.72		1		45		1.524		1.592
11:46	4.5		142		1.79		1.78		1		46		1.577		1.607
11:48	4.5		142		1.8		1.81		1		45		1.541		1.72
11:50	4.5		141		1.78		1.79		1.01		45		1.494		1.623
11:52	4.3		141		1.71		1.73		1.01		45		1.489		1.609
11:54	4.4		141		1.73		1.76		1.02		46		1.464		1.559
11:56	4.4		139		1.73		1.76		1.02		44		1.489		1.619
11:58	4.2		139		1.65		1.69		1.03		42		1.526		1.653
12:00	4.2		137		1.65		1.71		1.04		44		1.568		1.677
12:02	4		137		1.58		1.63		1.03		43		1.404		1.498
12:04	4.3		137		1.7		1.77		1.04		47		1.428		1.538
12:06	4		134		1.58		1.67		1.06		45		1.465		1.521
12:08	3.8		134		1.49		1.57		1.05		42		1.328		1.426
12:10	3.5		133		1.38		1.44		1.04		39		1.227		1.315
12:12			133						1.05		19				1.333
12:28			129
12:44			127
13:00			122
13:15			113
13:31			114
13:47			115
14:02			109
14:18			109
14:34			122
14:50			110
	3.73344	0.682837	125.906	228.512	1.47515	0.106826	1.33809	0.15696	0.892133	0.00823022	38.9667	92.2464	1.17805	0.0665783	1.23843	0.0774194
	METS						HR						VO2						VCO2						RER						VE						Vtex						Vtin						LABEL
	Rest		Test		Recovery		Rest		Test		Recovery		Rest		Test		Recovery		Rest		Test		Recovery		Rest		Test		Recovery		Rest		Test		Recovery		Rest		Test		Recovery		Rest		Test		Recovery
	MEDIA	VAR	MEDIA	VAR	MEDIA	VAR	MEDIA	VAR	MEDIA	VAR	MEDIA	VAR	MEDIA	VAR	MEDIA	VAR	MEDIA	VAR	MEDIA	VAR	MEDIA	VAR	MEDIA	VAR	MEDIA	VAR	MEDIA	VAR	MEDIA	VAR	MEDIA	VAR	MEDIA	VAR	MEDIA	VAR	MEDIA	VAR	MEDIA	VAR	MEDIA	VAR	MEDIA	VAR	MEDIA	VAR	MEDIA	VAR	BIN
	1.02143	0.0402747	3.67299	0.692601	4.396	0.101233	78.3	9.58947	124.609	220.744	135.778	182.235	0.405714	0.00724176	1.45095	0.108083	1.7404	0.0169957	0.326429	0.00445549	1.29934	0.152263	1.7628	0.011896	0.807143	0.000237363	0.880365	0.00737203	1.01615	0.000416615	11.2143	5.87363	38.3796	93.4891	45.1538	38.7754	0.651071	0.0329439	1.14811	0.0610268	1.50628	0.0100405	0.620143	0.00460352	1.20364	0.0693678	1.60512	0.0153349	1
	1.02143	0.0402747	3.67299	0.692601	4.396	0.101233	78.3	9.58947	124.609	220.744	135.778	182.235	0.405714	0.00724176	1.45095	0.108083	1.7404	0.0169957	0.326429	0.00445549	1.29934	0.152263	1.7628	0.011896	0.807143	0.000237363	0.880365	0.00737203	1.01615	0.000416615	11.2143	5.87363	38.3796	93.4891	45.1538	38.7754	0.651071	0.0329439	1.14811	0.0610268	1.50628	0.0100405	0.620143	0.00460352	1.20364	0.0693678	1.60512	0.0153349	1
[truncated: 1 more columns]
