# Supplementary material for: On the development of diagnostic support algorithms based on CPET biosignals data via machine learning and wavelets
Source: PeerJ journal article supplement (doi:10.7717/peerj-cs.2474), 2025-01-30
Supplement: raw_data.zip [file Subject29_BxB.xlsx]

## Sheet: Demographics
Gender:	female
Age:	45
Height (cm):	162
Weight (kg):	81.1
BMI:	3
Condition:	Metabolic Syndrome

## Sheet: Subject29_BxB
Time	METS		HR		V'O2		V'CO2		RER		V'E		VTex		VTin
min			1/min		L/min		L/min				L/min		L		L
00:00	Rest
01:26									0.85
01:33	1.7		99		0.47		0.41		0.86		13		1.568		1.426
01:38	0.9		94		0.24		0.19		0.76		7		0.617		0.635
01:40	0.8		102		0.22		0.15		0.7		7		0.262		0.281
01:48	1.5		107		0.44		0.37		0.85		13		1.569		1.804
01:53	1.6		107		0.46		0.4		0.87		14		1.252		1.246
01:59	1.4		107		0.4		0.35		0.89		12		1.225		1.268
01:59	Test
02:06	1.3		91		0.36		0.32		0.89		11		1.203		1.26
02:09	1.5		91		0.44		0.38		0.86		13		0.749		0.737
02:13	1.6		90		0.45		0.39		0.85		13		0.852		0.757
02:17	2.1		104		0.61		0.52		0.86		18		1.205		1.155
02:22	2.1		104		0.59		0.53		0.89		17		1.634		1.577
02:27	2.2		104		0.61		0.55		0.89		18		1.353		1.414
02:32	2		104		0.58		0.53		0.92		18		1.59		1.5
02:37	2.3		104		0.66		0.58		0.88		19		1.471		1.395
02:42	2.2		104		0.62		0.54		0.87		18		1.466		1.495
02:46	2.5		0		0.7		0.59		0.84		19		1.336		1.375
02:52	2.3		117		0.66		0.55		0.83		17		1.614		1.484
02:57	2.5		118		0.72		0.6		0.83		19		1.728		1.899
03:02	2.8		118		0.78		0.65		0.83		21		1.729		1.682
03:05	2.3		116		0.65		0.49		0.75		16		0.944		0.882
03:10	3		120		0.85		0.63		0.74		20		1.432		1.419
03:15	2.5		121		0.71		0.52		0.74		17		1.407		1.363
03:18	3.4		121		0.96		0.68		0.71		21		1.28		1.361
03:22	3.6		127		1.03		0.76		0.74		24		1.68		1.656
03:26	3.1		127		0.89		0.66		0.75		21		1.275		1.402
03:29	3.2		126		0.91		0.68		0.74		21		1.196		1.17
03:33	3.3		126		0.93		0.68		0.74		21		1.236		1.231
03:37	3.3		126		0.92		0.7		0.76		22		1.366		1.478
03:41	3.2		127		0.91		0.7		0.77		22		1.456		1.553
03:44	3		126		0.87		0.65		0.75		21		1.356		1.282
03:47	3.7		126		1.06		0.8		0.75		25		1.22		1.246
03:51	3.3		129		0.92		0.7		0.76		22		1.244		1.224
03:54	3.7		129		1.05		0.82		0.78		25		1.565		1.575
03:58	3.4		129		0.96		0.75		0.79		23		1.352		1.491
04:01	3.3		131		0.94		0.72		0.77		22		1.27		1.265
04:04	3.6		131		1.03		0.77		0.75		23		1.228		1.231
04:08	3.4		131		0.95		0.71		0.74		22		1.275		1.315
04:13	3.6		133		1.02		0.87		0.85		27		2.485		2.71
04:16	3.8		131		1.07		0.85		0.8		26		1.333		1.296
04:19	3.6		131		1.02		0.79		0.77		25		1.026		1.037
04:23	3.4		130		0.95		0.77		0.81		23		1.639		1.794
04:27	3.6		133		1.03		0.81		0.79		23		1.48		1.516
04:31	3.4		134		0.98		0.75		0.77		22		1.383		1.232
04:34	4.3		134		1.22		0.9		0.74		26		1.385		1.451
04:37	4.2		136		1.19		0.92		0.78		27		1.584		1.663
04:40	4		139		1.13		0.89		0.79		27		1.284		1.388
04:44	3.7		139		1.04		0.83		0.8		24		1.554		1.521
04:48	4.1		137		1.15		0.92		0.79		26		1.774		1.78
04:53	3.9		137		1.11		0.9		0.82		25		1.949		2.07
04:58	4		137		1.13		0.97		0.86		28		2.273		2.509
05:02	3.1		136		0.87		0.71		0.82		22		1.503		1.539
05:06	4.3		137		1.21		0.98		0.81		27		2.004		1.775
05:10	3.8		141		1.07		0.84		0.78		24		1.704		1.68
05:14	4.9		141		1.39		1.15		0.83		33		1.958		1.967
05:18	4.2		139		1.18		1		0.85		29		1.829		1.823
05:22	4.2		139		1.19		1.04		0.87		30		2.306		2.321
05:27	3.9		141		1.12		0.97		0.86		28		2.036		2.163
05:31	4.3		142		1.21		1.02		0.84		28		1.949		1.936
05:34	4.4		142		1.26		1.07		0.85		32		1.744		1.858
05:37	4.5		142		1.27		1.08		0.85		33		1.452		1.441
05:40	3.7		144		1.06		0.9		0.85		27		1.59		1.527
05:44	4.5		144		1.27		1.11		0.87		32		1.953		1.923
05:48	4		146		1.14		1.03		0.91		31		2.192		2.276
05:53	3.8		148		1.07		0.94		0.88		26		1.974		2.005
05:57	3.6		144		1.01		0.89		0.89		26		1.931		2.159
06:01	4.3		146		1.21		1		0.83		26		1.644		1.619
06:04	4.7		146		1.34		1.15		0.86		33		1.778		1.852
06:08	4.5		150		1.27		1.13		0.89		33		1.899		1.948
06:11	4.4		150		1.24		1.13		0.91		33		1.868		1.946
06:14	4.2		151		1.2		1.09		0.91		31		1.815		1.882
06:17	4.3		151		1.22		1.11		0.91		33		1.599		1.707
06:21	3.8		153		1.08		0.97		0.9		29		1.847		1.797
06:24	4.6		153		1.31		1.2		0.91		34		1.819		1.828
06:28	4.3		153		1.21		1.12		0.92		32		1.919		1.964
06:31	4.4		155		1.26		1.17		0.93		35		1.968		1.995
06:35	4.2		151		1.19		1.11		0.93		33		1.723		1.808
06:38	4.3		151		1.23		1.15		0.93		34		1.751		1.875
06:41	4.1		151		1.17		1.08		0.92		31		1.8		1.772
06:45	3.9		151		1.12		1.03		0.93		30		1.99		2.17
06:48	4.3		151		1.22		1.11		0.91		32		1.65		1.707
06:52	4.1		151		1.18		1.11		0.94		33		1.895		2.066
06:55	3.9		153		1.12		1.01		0.9		29		1.792		1.622
06:59	4.5		157		1.27		1.1		0.87		30		2.039		1.889
07:02	5.3		157		1.52		1.36		0.89		40		2.041		2.252
07:05	5.1		162		1.45		1.36		0.93		40		1.993		2.062
07:08	4.8		162		1.38		1.34		0.97		41		2.011		2.099
07:11	4.6		164		1.3		1.26		0.97		37		2.004		1.979
07:14	4.9		164		1.39		1.38		0.99		41		2.07		2.139
07:18	4.5		164		1.28		1.3		1.02		40		2.038		2.209
07:21	4.4		164		1.25		1.27		1.02		39		2.093		2.163
07:24	4.4		164		1.25		1.25		1		36		2.024		2.045
07:27	4.5		164		1.28		1.27		0.99		38		2.006		2.05
07:30	4.5		164		1.27		1.26		0.99		38		2.026		2.102
07:33	4.6		164		1.32		1.3		0.99		40		1.923		1.971
07:36	4.6		162		1.3		1.3		1		41		1.939		2.048
07:39	4.3		162		1.23		1.21		0.98		36		1.72		1.808
07:42	4.7		162		1.33		1.32		0.99		40		1.909		1.879
07:45	4.5		164		1.28		1.28		1		38		1.873		2.077
07:48	4.7		164		1.34		1.36		1.01		42		1.897		2.083
07:50	4.3		164		1.23		1.23		1		38		1.809		1.814
07:53	4.7		164		1.32		1.31		0.99		39		1.9		1.952
07:57	4.2		164		1.18		1.23		1.04		39		2.493		2.562
08:00	5.2		166		1.46		1.45		0.99		43		1.949		2.012
08:03	4.4		166		1.25		1.23		0.99		37		1.886		1.938
08:05	5.6		169		1.58		1.57		1		49		1.941		1.944
08:08	4.8		169		1.37		1.39		1.02		44		1.793		1.859
08:11	4.5		169		1.27		1.32		1.04		41		1.952		2.082
08:13	4.8		169		1.36		1.4		1.03		44		1.914		2.063
08:16	4.9		169		1.4		1.47		1.05		47		1.944		2.025
08:18	4.6		169		1.29		1.37		1.06		45		1.97		2.102
08:21	4.5		171		1.28		1.35		1.05		41		1.919		2.009
08:24	4.6		171		1.32		1.37		1.04		43		1.877		1.961
08:26	4.7		171		1.33		1.38		1.04		42		1.964		1.99
08:29	4.6		171		1.29		1.34		1.03		42		2.01		2.143
08:32	4.7		171		1.33		1.35		1.01		41		1.933		2.06
08:35	5.3		171		1.5		1.51		1.01		47		2.031		2.015
08:38	4.9		171		1.4		1.43		1.03		43		2.192		2.206
08:41	4.8		171		1.37		1.4		1.02		44		2.057		2.183
08:43	5.1		171		1.44		1.45		1.01		45		2.079		1.995
08:46	4.9		173		1.4		1.4		1		42		1.993		2.006
08:49	5.1		173		1.43		1.47		1.02		45		2.157		2.3
08:52	4.7		173		1.34		1.36		1.01		41		2.091		2.062
08:55	5.2		173		1.47		1.48		1		45		2.059		2.169
08:58	5.3		173		1.49		1.5		1		46		2.214		2.103
09:01	5		173		1.42		1.42		1		43		2.185		2.298
09:04	5.5		173		1.56		1.57		1.01		48		2.256		2.244
09:06	5.2		176		1.48		1.51		1.02		47		2.035		2.246
09:09	5.2		176		1.48		1.51		1.02		46		1.914		1.976
09:12	4.3		173		1.22		1.23		1.01		35		1.955		2.07
09:15	6.1		176		1.72		1.74		1.01		54		2.34		2.13
09:18	5.3		176		1.51		1.54		1.02		47		2.246		2.265
09:20	5.8		176		1.63		1.67		1.02		52		2.122		2.194
09:22	5.3		176		1.51		1.58		1.04		51		1.987		2.118
09:25	5.4		176		1.54		1.63		1.06		54		1.98		2.089
09:27	5.2		176		1.48		1.58		1.07		51		2.011		2.051
09:29	5.3		176		1.49		1.59		1.07		51		1.983		2.023
09:32	5.5		176		1.56		1.66		1.07		52		2.1		2.087
09:34	5.5		176		1.57		1.67		1.06		53		2.183		2.09
09:37	5.1		179		1.46		1.56		1.07		51		2.05		2.231
09:39	5.5		179		1.56		1.66		1.06		54		2.047		1.996
09:41	5.6		179		1.58		1.7		1.07		56		2.069		2.059
09:43	5.3		179		1.51		1.62		1.07		53		1.773		1.837
09:46	5.1		179		1.46		1.55		1.06		48		2.017		2.024
09:48	5.6		179		1.58		1.68		1.06		54		2.048		2.171
09:50	5.6		179		1.6		1.72		1.07		57		2.189		2.151
09:52	5.2		179		1.49		1.61		1.08		54		1.978		2.126
09:55	5		181		1.42		1.55		1.09		48		1.827		2.017
09:57	5.5		181		1.56		1.7		1.09		54		1.925		1.995
09:58	5.7		181		1.63		1.77		1.09		60		1.604		1.727
10:01	5.1		181		1.45		1.59		1.1		51		1.982		2.023
10:03	5.3		181		1.5		1.63		1.09		53		1.795		2.003
10:03	Recovery
10:05	5.3		181		1.52		1.64		1.08		54		1.844		1.857
10:07	5		181		1.42		1.53		1.07		49		1.945		2.005
10:09	5.4		179		1.52		1.65		1.08		53		1.978		2.126
10:12	4.8		179		1.37		1.46		1.07		45		1.926		2.083
10:15	5		173		1.42		1.5		1.06		47		2.113		2.237
10:17	5.2		173		1.47		1.52		1.03		48		1.857		2.019
10:19	5.3		169		1.49		1.57		1.05		51		1.997		2.125
10:22	4.8		169		1.37		1.43		1.05		45		1.913		1.904
10:25	4.9		164		1.38		1.47		1.06		46		2.229		2.38
10:28	4.6		164		1.31		1.4		1.06		43		2.076		2.188
10:31	4.9		162		1.38		1.49		1.08		46		2.32		2.428
10:33	4.3		162		1.23		1.32		1.07		41		1.899		2.028
10:36	4.3		160		1.23		1.33		1.08		40		1.992		2.047
10:39	4.3		155		1.23		1.36		1.11		43		2.016		2.204
10:42	4.2		155		1.2		1.35		1.12		44		1.925		2.005
10:45	3		155		0.85		0.96		1.13		29		1.692		1.828
10:48	3.9		155		1.12		1.21		1.08		37		1.785		2.016
10:50	4		155		1.15		1.27		1.11		42		1.59		1.821
10:54	2.6		155		0.73		0.82		1.12		27		1.434		1.522
11:09			144
11:25			142
11:41			142
11:57			136
12:12			133
12:28			130
12:44			129
13:00			126
13:16			126
13:31			130
13:47			126
14:03			118
14:19			120
14:35			110
14:50			113
	4.25671	0.927869	149.894	629.05	1.20823	0.0747619	1.15805	0.127406	0.941524	0.0131848	35.6341	134.111	1.80859	0.102903	1.86138	0.123485
	METS						HR						VO2						VCO2						RER						VE						Vtex						Vtin						LABEL
	Rest		Test		Recovery		Rest		Test		Recovery		Rest		Test		Recovery		Rest		Test		Recovery		Rest		Test		Recovery		Rest		Test		Recovery		Rest		Test		Recovery		Rest		Test		Recovery
	MEDIA	VAR	MEDIA	VAR	MEDIA	VAR	MEDIA	VAR	MEDIA	VAR	MEDIA	VAR	MEDIA	VAR	MEDIA	VAR	MEDIA	VAR	MEDIA	VAR	MEDIA	VAR	MEDIA	VAR	MEDIA	VAR	MEDIA	VAR	MEDIA	VAR	MEDIA	VAR	MEDIA	VAR	MEDIA	VAR	MEDIA	VAR	MEDIA	VAR	MEDIA	VAR	MEDIA	VAR	MEDIA	VAR	MEDIA	VAR	BIN
	1.31667	0.141667	4.22276	0.968992	4.51579	0.570292	102.667	29.0667	150.069	674.634	149.147	448.493	0.371667	0.0126567	1.19834	0.0781153	1.28368	0.0452912	0.311667	0.0126567	1.12855	0.131093	1.38316	0.0444895	0.825714	0.0047619	0.923448	0.0119922	1.07947	0.000738596	11	10	34.5793	136.009	43.6842	49.0058	1.08217	0.282268	1.79363	0.109212	1.92268	0.0426027	1.11	0.307564	1.83754	0.129374	2.04332	0.043716	1
	1.31667	0.141667	4.22276	0.968992	4.51579	0.570292	102.667	29.0667	150.069	674.634	149.147	448.493	0.371667	0.0126567	1.19834	0.0781153	1.28368	0.0452912	0.311667	0.0126567	1.12855	0.131093	1.38316	0.0444895	0.825714	0.0047619	0.923448	0.0119922	1.07947	0.000738596	11	10	34.5793	136.009	43.6842	49.0058	1.08217	0.282268	1.79363	0.109212	1.92268	0.0426027	1.11	0.307564	1.83754	0.129374	2.04332	0.043716	1
[truncated: 1 more columns]
