# Supplementary material for: On the development of diagnostic support algorithms based on CPET biosignals data via machine learning and wavelets
Source: PeerJ journal article supplement (doi:10.7717/peerj-cs.2474), 2025-01-30
Supplement: raw_data.zip [file Subject30_BxB.xlsx]

## Sheet: Demographics
Gender:	female
Age:	52
Height (cm):	164
Weight (kg):	84.8
BMI:	32
Condition:	Metabolic Syndrome

## Sheet: Subject30_BxB
Time	METS		HR		V'O2		V'CO2		RER		V'E		VTex		VTin
min			1/min		L/min		L/min				L/min		L		L
00:00	Rest
00:03	1				0.3		0.23		0.78		11		0.515
00:08	1.1		76		0.32		0.27		0.83		9		0.729		0.807
00:12	0.9		73		0.28		0.23		0.83		9		0.591		0.662
00:17	0.8		72		0.24		0.2		0.84		7		0.587		0.821
00:22	0.6		73		0.19		0.16		0.85		6		0.519		0.746
00:22	Test
00:28	1.4		76		0.42		0.37		0.87		11		1.118		1.28
00:31	1.5		78		0.44		0.36		0.81		13		0.549		0.515
00:39	1.1		85		0.33		0.26		0.77		7		0.93		0.959
00:44	1.7		88		0.5		0.36		0.73		10		0.909		1.249
00:51	2		92		0.6		0.41		0.69		10		1.109		1.289
00:55	2.3		94		0.67		0.48		0.71		13		0.955		1.05
00:59	3		94		0.89		0.67		0.76		19		1.336		1.412
01:03	2.8		94		0.84		0.7		0.83		21		1.504		1.635
01:07	1.4		93		0.41		0.33		0.8		11		0.652		0.875
01:14	1		94		0.31		0.23		0.76		8		0.803		1.134
01:17	3.3		96		0.99		0.69		0.7		18		1.032		0.968
01:21	2.4		96		0.7		0.49		0.7		14		0.857		1.016
01:25	2.7		96		0.79		0.56		0.72		15		1.203		1.315
01:30	2.5		95		0.74		0.53		0.72		15		1.051		1.193
01:33	2.5		95		0.73		0.52		0.71		15		0.937		1.072
01:38	2.5		96		0.74		0.53		0.72		15		1.02		1.201
01:42	2.7		97		0.8		0.57		0.71		15		1.085		1.199
01:46	2.7		97		0.81		0.57		0.7		15		1.066		1.178
01:52	2.7		98		0.81		0.63		0.77		18		1.816		2.348
01:56	2.7		98		0.8		0.54		0.68		14		1.004		0.902
02:00	3		98		0.88		0.61		0.68		16		1.035		1.173
02:04	3.4		100		1		0.71		0.71		19		1.348		1.466
02:08	3.1		100		0.92		0.66		0.72		18		1.164		1.328
02:11	2.6		101		0.76		0.55		0.72		16		0.876		1.15
02:15	3.7		103		1.1		0.77		0.7		21		1.089		1.006
02:18	2.4		103		0.71		0.52		0.73		15		0.844		1.273
02:21	2.5		105		0.73		0.54		0.74		17		0.826		1.24
02:27	3.8		105		1.14		0.76		0.67		18		1.873		1.406
02:31	3.8		104		1.11		0.79		0.71		21		1.334		1.569
02:34	4.2		104		1.24		0.89		0.72		24		1.319		1.337
02:38	3.5		104		1.05		0.79		0.75		22		1.176		1.35
02:41	3.5		104		1.03		0.76		0.74		20		1.207		1.184
02:47	3.4		105		1.01		0.74		0.73		16		1.481		1.659
02:50	4.1		107		1.2		0.88		0.73		22		1.328		1.394
02:54	3.5		107		1.05		0.81		0.77		22		1.348		1.579
02:58	4.2		110		1.24		0.96		0.77		24		1.655		1.479
03:01	4.3		110		1.27		1.03		0.81		27		1.557		1.802
03:05	3.9		109		1.14		0.92		0.8		25		1.282		1.306
03:08	3.8		109		1.13		0.91		0.8		23		1.354		1.423
03:12	3.9		110		1.17		0.94		0.81		24		1.452		1.47
03:16	4.5		111		1.32		1.09		0.82		28		1.853		1.869
03:19	3.3		111		0.99		0.8		0.81		21		1.209		1.42
03:22	3.5		111		1.05		0.83		0.79		21		1.122		1.218
03:26	4		109		1.18		0.94		0.8		24		1.447		1.499
03:30	3.9		109		1.17		0.93		0.8		23		1.41		1.528
03:33	3.7		109		1.1		0.88		0.8		23		1.34		1.492
03:37	3.7		111		1.1		0.86		0.78		21		1.228		1.301
03:41	4.2		111		1.24		0.95		0.77		23		1.502		1.484
03:44	5		111		1.48		1.18		0.8		31		1.608		1.645
03:47	4.6		114		1.37		1.17		0.85		32		1.6		1.78
03:50	4.1		114		1.22		1.05		0.86		28		1.552		1.537
03:53	4		114		1.19		1.06		0.9		29		1.531		1.637
03:58	2.9		111		0.87		0.74		0.85		19		1.441		1.518
04:02	3.5		112		1.04		0.81		0.78		18		1.218		1.405
04:05	5		113		1.49		1.2		0.81		30		1.509		1.581
04:08	4.3		113		1.27		1.07		0.84		28		1.513		1.643
04:11	4		110		1.19		1.01		0.85		27		1.37		1.5
04:14	3.8		107		1.11		0.96		0.86		26		1.192		1.417
04:18	3.5		107		1.04		0.88		0.85		23		1.552		1.41
04:22	3.7		106		1.11		0.93		0.83		23		1.352		1.45
04:25	3.9		107		1.16		0.95		0.82		24		1.405		1.497
04:29	3.9		107		1.17		0.97		0.83		25		1.409		1.467
04:32	3.5		107		1.03		0.85		0.82		21		1.275		1.396
04:35	4		107		1.19		0.97		0.82		24		1.312		1.408
04:39	3.8		107		1.14		0.94		0.82		24		1.303		1.46
04:42	4.1		110		1.21		1		0.83		25		1.421		1.501
04:46	4.1		112		1.21		1		0.83		25		1.437		1.533
04:49	3.8		113		1.14		0.94		0.83		23		1.313		1.46
04:52	4.7		113		1.39		1.17		0.84		30		1.586		1.67
04:56	3.7		114		1.09		0.92		0.85		23		1.453		1.613
04:59	4.2		115		1.23		1.03		0.83		25		1.538		1.597
05:03	4.9		115		1.47		1.26		0.86		32		1.847		1.912
05:06	3.9		116		1.16		1		0.86		26		1.519		1.636
05:10	3.9		117		1.16		1		0.86		26		1.458		1.569
05:13	4.5		117		1.34		1.14		0.85		28		1.427		1.506
05:16	4.1		118		1.21		1.04		0.86		27		1.511		1.61
05:20	4.3		118		1.29		1.1		0.85		27		1.738		1.716
05:23	4.8		118		1.42		1.23		0.86		32		1.587		1.747
05:29	4		120		1.18		1.06		0.9		26		2.35		2.423
05:31	4.5		121		1.33		1.09		0.82		27		1.255		1.333
05:34	5.4		121		1.61		1.35		0.84		34		1.448		1.633
05:36	4.7		123		1.41		1.22		0.87		32		1.385		1.591
05:39	5.5		123		1.62		1.41		0.87		36		1.325		1.341
05:41	4.6		125		1.36		1.2		0.88		30		1.461		1.541
05:44	4.7		125		1.41		1.26		0.9		33		1.451		1.609
05:47	4.7		125		1.39		1.25		0.89		30		1.546		1.66
05:50	4.8		125		1.41		1.27		0.9		34		1.364		1.637
05:53	4.9		125		1.44		1.31		0.91		33		1.61		1.609
05:55	4.7		125		1.39		1.27		0.91		33		1.5		1.612
05:58	4.7		125		1.4		1.28		0.91		32		1.533		1.63
06:01	4.4		123		1.31		1.2		0.92		34		1.434		1.585
06:03	4.5		123		1.33		1.2		0.9		30		1.257		1.335
06:06	4.7		123		1.41		1.28		0.91		32		1.622		1.669
06:09	4.9		122		1.45		1.33		0.91		35		1.442		1.662
06:11	4.9		122		1.45		1.34		0.92		35		1.47		1.589
06:14	4.7		123		1.38		1.29		0.93		33		1.525		1.661
06:17	4.6		123		1.38		1.29		0.93		33		1.495		1.666
06:19	4.6		125		1.36		1.26		0.93		32		1.476		1.558
06:22	4.6		125		1.36		1.26		0.93		33		1.453		1.63
06:25	4.8		125		1.42		1.31		0.92		34		1.445		1.491
06:27	4.8		125		1.42		1.31		0.92		35		1.391		1.547
06:29	4.7		123		1.4		1.31		0.93		34		1.387		1.568
06:32	4.8		123		1.43		1.33		0.93		36		1.405		1.482
06:34	4.5		125		1.33		1.25		0.94		33		1.4		1.553
06:37	5		125		1.48		1.38		0.94		36		1.444		1.51
06:39	5		126		1.48		1.39		0.94		36		1.533		1.664
06:42	4.9		126		1.46		1.4		0.96		38		1.471		1.693
06:44	4.8		127		1.43		1.35		0.94		37		1.455		1.489
06:46	4.9		127		1.46		1.4		0.95		38		1.506		1.608
06:49	4.8		129		1.44		1.37		0.95		37		1.467		1.621
06:52	4.7		129		1.4		1.33		0.95		34		1.554		1.597
06:54	5		129		1.48		1.4		0.95		36		1.598		1.723
06:57	4.9		129		1.45		1.38		0.95		36		1.494		1.646
06:59	5		129		1.48		1.41		0.95		37		1.443		1.609
07:02	5		129		1.48		1.41		0.95		37		1.532		1.617
07:04	4.8		130		1.44		1.36		0.95		35		1.457		1.628
07:07	4.9		130		1.45		1.37		0.94		37		1.551		1.616
07:09	5		129		1.48		1.39		0.94		37		1.529		1.595
07:12	5.2		129		1.54		1.46		0.95		39		1.662		1.776
07:16	4.3		130		1.28		1.17		0.91		25		1.655		1.828
07:18	5.6		130		1.65		1.52		0.92		39		1.533		1.748
07:20	5.5		131		1.62		1.51		0.93		40		1.493		1.599
07:22	5.3		131		1.58		1.51		0.95		41		1.591		1.715
07:25	5.2		131		1.56		1.5		0.97		41		1.658		1.71
07:28	4.8		131		1.44		1.38		0.96		34		1.568		1.655
07:30	5.3		131		1.57		1.5		0.96		39		1.576		1.759
07:32	5.5		131		1.62		1.57		0.97		42		1.657		1.75
07:35	5		133		1.49		1.45		0.97		38		1.541		1.725
07:37	4.9		133		1.46		1.43		0.97		37		1.528		1.745
07:40	5.6		134		1.66		1.62		0.98		43		1.606		1.684
07:42	5.5		134		1.62		1.61		0.99		42		1.734		1.852
07:45	4.7		134		1.38		1.33		0.97		35		1.48		1.615
07:48	5.2		134		1.54		1.49		0.97		38		1.86		1.91
07:50	5.5		133		1.63		1.57		0.96		40		1.593		1.873
07:52	5.8		133		1.71		1.66		0.97		44		1.78		1.741
07:55	5.3		133		1.57		1.54		0.98		41		1.62		1.81
07:57	5.1		133		1.52		1.49		0.98		38		1.649		1.757
08:00	5.5		133		1.64		1.62		0.99		42		1.806		1.881
08:03	5		133		1.5		1.47		0.98		39		1.677		1.859
08:05	5.3		136		1.58		1.55		0.98		41		1.648		1.757
08:07	5.4		136		1.61		1.57		0.98		41		1.643		1.731
08:11	5.5		134		1.63		1.67		1.02		42		2.311		2.459
08:13	5.1		134		1.51		1.49		0.98		38		1.403		1.636
08:15	5.4		134		1.6		1.57		0.98		43		1.46		1.608
08:17	5.4		134		1.6		1.57		0.98		40		1.53		1.617
08:19	5.5		136		1.63		1.61		0.99		43		1.547		1.642
08:21	5.4		136		1.62		1.6		0.99		44		1.548		1.69
08:23	5.4		136		1.61		1.61		1		45		1.482		1.625
08:26	5.3		136		1.59		1.59		1		42		1.459		1.551
08:28	5.6		136		1.68		1.68		1		46		1.574		1.672
08:30	5.4		137		1.6		1.61		1		43		1.522		1.648
08:32	5.5		137		1.63		1.62		0.99		42		1.445		1.542
08:34	5.6		137		1.66		1.65		1		44		1.51		1.665
08:36	5.5		137		1.63		1.64		1		44		1.511		1.657
08:38	5.5		137		1.64		1.64		1		43		1.591		1.68
08:40	5.8		137		1.72		1.72		1		46		1.777		1.876
08:43	5.6		137		1.65		1.68		1.02		47		1.656		1.856
08:45	5.5		139		1.63		1.66		1.02		45		1.609		1.73
08:47	5.7		139		1.69		1.72		1.01		46		1.789		1.795
08:50	4.6		139		1.36		1.31		0.96		31		1.605		1.739
08:52	6.1		139		1.8		1.76		0.98		48		1.77		1.892
08:55	6		141		1.78		1.78		1		49		1.652		1.873
08:57	5.8		141		1.72		1.75		1.01		48		1.586		1.747
08:59	5.6		141		1.67		1.7		1.02		46		1.611		1.651
09:01	5.7		144		1.68		1.73		1.03		46		1.884		1.947
09:03	5.8		144		1.71		1.75		1.02		47		1.645		1.802
09:05	5.8		144		1.72		1.75		1.02		47		1.6		1.765
09:08	6.2		144		1.84		1.89		1.03		50		1.952		1.945
09:10	5.7		146		1.71		1.76		1.03		46		1.713		1.903
09:12	6		146		1.77		1.82		1.03		48		1.623		1.755
09:14	5.9		146		1.74		1.79		1.03		48		1.629		1.747
09:16	5.7		146		1.71		1.76		1.03		44		1.791		1.865
09:19	6.4		146		1.89		1.97		1.04		52		1.959		2.064
09:21	5.9		146		1.76		1.84		1.04		50		1.694		1.931
09:23	6.1		146		1.81		1.89		1.05		52		1.816		1.842
09:25	6.1		148		1.81		1.9		1.05		52		1.736		1.874
09:27	6		148		1.79		1.88		1.05		51		1.815		1.845
09:29	6.1		148		1.81		1.91		1.05		52		1.663		1.895
09:31	6.3		148		1.86		1.97		1.06		55		1.787		1.79
09:33	6.3		148		1.87		2.03		1.08		57		1.962		2.015
09:35	6.1		150		1.82		1.97		1.08		56		1.798		1.931
09:37	5.8		150		1.72		1.86		1.08		50		1.791		1.921
09:39	6.2		150		1.83		1.98		1.08		56		1.779		1.896
09:41	6.3		150		1.87		2.04		1.09		55		2.112		2.056
09:43	5.7		150		1.68		1.82		1.08		49		1.854		2.034
09:45	5.7		151		1.69		1.79		1.06		49		1.53		1.81
09:47	6.2		151		1.85		1.98		1.07		54		1.605		1.734
09:49	6.3		151		1.86		2		1.07		54		1.722		1.749
09:51	6.4		151		1.91		2.06		1.08		57		1.78		1.922
09:53	6.2		151		1.85		1.98		1.07		53		1.745		1.798
09:55	6.1		150		1.82		1.97		1.08		55		1.67		1.895
09:57	5.2		150		1.55		1.62		1.05		40		1.773		1.759
09:59	7		150		2.07		2.16		1.04		59		1.713		1.779
10:01	6.6		150		1.95		2.07		1.07		56		1.688		1.807
10:03	6.6		150		1.96		2.11		1.08		59		1.793		1.835
10:04	6.5		150		1.92		2.08		1.08		58		1.704		1.866
10:06	6.4		150		1.9		2.07		1.09		59		1.775		1.855
10:08	6.3		150		1.87		2.06		1.1		57		1.87		1.966
10:10	6.1		150		1.82		1.99		1.1		55		1.696		1.845
10:12	6.3		150		1.86		2.04		1.09		56		1.808		1.921
10:14	6.3		151		1.86		2.05		1.1		59		1.726		1.879
10:16	6.4		151		1.91		2.11		1.11		56		1.811		1.915
10:18	6.3		151		1.86		2.06		1.11		57		1.838		1.947
10:19	6.1		151		1.82		2.02		1.11		58		1.666		1.847
10:21	6.4		151		1.89		2.1		1.11		59		1.796		1.856
10:23	5.8		151		1.72		1.89		1.1		48		1.787		1.962
10:25	6.3		151		1.88		2.05		1.09		56		1.656		1.854
10:27	6.3		151		1.86		2.05		1.1		58		1.71		1.802
10:29	4.9		151		1.46		1.56		1.07		40		1.672		1.867
10:31	7		151		2.08		2.2		1.06		57		1.633		1.639
10:33	7.1		151		2.1		2.26		1.08		64		1.773		1.833
10:34	7.2		151		2.13		2.35		1.1		66		1.916		1.974
10:36	6.5		151		1.92		2.15		1.12		60		1.905		1.962
10:38	6.2		151		1.83		2.06		1.12		60		1.685		1.919
10:40	6.5		151		1.93		2.17		1.13		62		1.82		1.833
10:42	6.4		151		1.88		2.11		1.12		60		1.796		1.876
10:43	6.4		151		1.89		2.13		1.12		62		1.826		1.929
10:45	6.3		153		1.88		2.14		1.14		61		1.956		2.142
10:47	6.7		153		1.98		2.25		1.13		65		1.737		1.871
10:49	6.8		153		2.02		2.32		1.15		67		1.891		1.931
10:51	6.2		155		1.85		2.12		1.15		60		1.893		1.98
10:52	6.4		155		1.91		2.18		1.14		64		1.782		1.928
10:54	6.4		155		1.9		2.18		1.15		62		1.837		1.952
10:56	6.4		155		1.9		2.16		1.14		62		1.744		1.877
10:58	6		155		1.78		2.01		1.13		54		1.737		1.857
10:59	6.9		157		2.04		2.33		1.14		66		1.842		1.987
11:01	6.6		157		1.97		2.27		1.15		66		1.78		1.917
11:03	6.7		157		1.98		2.3		1.16		65		1.795		1.923
11:04	6.5		160		1.94		2.27		1.17		64		1.812		1.844
11:06	6.3		160		1.88		2.22		1.18		63		1.749		1.975
11:07	6.5		160		1.92		2.27		1.18		66		1.779		1.876
11:09	6.6		162		1.97		2.33		1.18		68		1.684		1.837
11:11	6.6		162		1.95		2.32		1.19		67		1.752		1.825
11:12	6.5		162		1.93		2.29		1.19		63		1.838		2.028
11:14	6.8		164		2.03		2.42		1.19		70		1.789		1.912
11:15	6.8		164		2.02		2.4		1.19		69		1.839		1.889
11:17	6.5		164		1.92		2.28		1.19		64		1.779		1.911
11:19	6.5		164		1.91		2.28		1.19		65		1.712		1.945
11:21	6.5		164		1.93		2.29		1.19		60		1.848		1.904
11:22	7		164		2.08		2.48		1.2		69		1.887		2.031
11:24	6.5		164		1.94		2.31		1.19		68		1.688		1.85
11:25	6.6		164		1.95		2.33		1.2		64		1.757		1.901
11:27	6.7		164		1.98		2.39		1.21		69		1.651		1.912
11:27	Recovery
11:28	6.6		166		1.96		2.38		1.22		69		1.853		1.895
11:30	6.6		166		1.97		2.4		1.22		71		1.789		1.993
11:31	6.7		166		1.99		2.43		1.22		71		1.778		1.891
11:33	6.6		166		1.96		2.38		1.22		71		1.786		1.912
11:34	6.8		166		2.03		2.47		1.22		74		1.761		1.927
11:36	6.6		166		1.95		2.33		1.2		69		1.651		1.762
11:37	6.5		166		1.93		2.31		1.2		67		1.709		1.834
11:39	6.5		164		1.94		2.31		1.19		66		1.727		1.822
11:41	6.4		164		1.9		2.25		1.18		61		1.942		2.052
11:43	6.1		164		1.81		2.1		1.16		55		1.641		1.826
11:44	6.3		160		1.88		2.19		1.16		61		1.674		1.87
11:46	6.1		160		1.82		2.1		1.15		55		1.736		1.877
11:48	6.4		160		1.89		2.19		1.16		58		1.765		1.826
11:50	6.2		155		1.83		2.12		1.16		58		1.708		1.899
11:51	6.3		155		1.86		2.16		1.16		58		1.732		1.809
11:53	5.9		155		1.75		2.02		1.16		53		1.685		1.887
11:55	6.1		150		1.81		2.1		1.16		53		1.899		1.97
11:57	5.9		150		1.74		1.99		1.14		54		1.623		1.832
11:59	6.1		146		1.8		2.07		1.15		56		1.692		1.765
12:01	5.7		146		1.68		1.93		1.15		50		1.673		1.858
12:03	5.7		146		1.7		1.94		1.14		55		1.525		1.763
12:04	5.9		141		1.75		2.03		1.16		57		1.554		1.656
12:06	5.9		141		1.74		2.03		1.17		57		1.632		1.737
12:09	4.9		139		1.46		1.72		1.18		43		1.985		2.168
12:25			130
12:40			127
12:56			118
13:12			118
13:27			114
13:43			114
	5.07378	1.70841	131.645	439.237	1.50547	0.150361	1.51052	0.319302	0.969064	0.0218845	40.8427	271.817	1.56221	0.070739	1.68042	0.0701887
	METS						HR						VO2						VCO2						RER						VE						Vtex						Vtin						LABEL
	Rest		Test		Recovery		Rest		Test		Recovery		Rest		Test		Recovery		Rest		Test		Recovery		Rest		Test		Recovery		Rest		Test		Recovery		Rest		Test		Recovery		Rest		Test		Recovery
	MEDIA	VAR	MEDIA	VAR	MEDIA	VAR	MEDIA	VAR	MEDIA	VAR	MEDIA	VAR	MEDIA	VAR	MEDIA	VAR	MEDIA	VAR	MEDIA	VAR	MEDIA	VAR	MEDIA	VAR	MEDIA	VAR	MEDIA	VAR	MEDIA	VAR	MEDIA	VAR	MEDIA	VAR	MEDIA	VAR	MEDIA	VAR	MEDIA	VAR	MEDIA	VAR	MEDIA	VAR	MEDIA	VAR	MEDIA	VAR	BIN
	0.88	0.037	4.96255	1.7226	6.2	0.17913	73.5	3	129.465	414.572	149.3	297.941	0.266	0.00268	1.47247	0.15157	1.83958	0.0161868	0.218	0.00167	1.44593	0.301028	2.16458	0.0349737	0.826	0.00073	0.948601	0.0193038	1.17625	0.000772283	8.4	3.8	38.9424	252.435	60.0833	63.1232	0.5882	0.0074952	1.54564	0.0735139	1.73	0.0123396	0.759	0.005242	1.6619	0.0722236	1.86796	0.0115052	1
	0.88	0.037	4.96255	1.7226	6.2	0.17913	73.5	3	129.465	414.572	149.3	297.941	0.266	0.00268	1.47247	0.15157	1.83958	0.0161868	0.218	0.00167	1.44593	0.301028	2.16458	0.0349737	0.826	0.00073	0.948601	0.0193038	1.17625	0.000772283	8.4	3.8	38.9424	252.435	60.0833	63.1232	0.5882	0.0074952	1.54564	0.0735139	1.73	0.0123396	0.759	0.005242	1.6619	0.0722236	1.86796	0.0115052	1
[truncated: 1 more columns]
