# Supplementary material for: On the development of diagnostic support algorithms based on CPET biosignals data via machine learning and wavelets
Source: PeerJ journal article supplement (doi:10.7717/peerj-cs.2474), 2025-01-30
Supplement: raw_data.zip [file Subject_31.xlsx]

## Sheet: Folha1
time	time	Speed	HR	VO2	VO2	VCO2	VCO2	RR	VE	ID_test	ID
	min	km/h	/min	ml/min	L/min	ml/min	L/min	/min	L/min
0	0	5	119	204	0.204	173	0.173	48	12.6	486_1	486
1	0.0166667	5	128	383	0.383	314	0.314	34	15	486_1	486
3	0.05	5	134	377	0.377	309	0.309	34	15	486_1	486
5	0.0833333	5	139	451	0.451	365	0.365	35	17	486_1	486
6	0.1	5	143	442	0.442	361	0.361	36	17.2	486_1	486
8	0.133333	5	146	482	0.482	392	0.392	35	18.1	486_1	486
10	0.166667	5	148	502	0.502	411	0.411	36	18.9	486_1	486
11	0.183333	5	149	550	0.55	451	0.451	35	20.3	486_1	486
13	0.216667	5	151	583	0.583	480	0.48	34	20.8	486_1	486
15	0.25	5	153	565	0.565	466	0.466	34	20.5	486_1	486
17	0.283333	5	155	566	0.566	471	0.471	35	21	486_1	486
18	0.3	5	157	633	0.633	519	0.519	34	21.9	486_1	486
20	0.333333	5	159	664	0.664	540	0.54	35	22.9	486_1	486
22	0.366667	5	161	709	0.709	571	0.571	36	24	486_1	486
23	0.383333	5	162	763	0.763	616	0.616	36	25.6	486_1	486
25	0.416667	5	163	783	0.783	629	0.629	37	26.4	486_1	486
27	0.45	5	163	790	0.79	629	0.629	37	26.4	486_1	486
31	0.516667	5	163	763	0.763	613	0.613	36	26.4	486_1	486
36	0.6	5	163	721	0.721	554	0.554	28	22	486_1	486
38	0.633333	5	163	727	0.727	563	0.563	28	22.4	486_1	486
40	0.666667	5	162	876	0.876	628	0.628	27	23.7	486_1	486
42	0.7	5	162	913	0.913	637	0.637	27	23.6	486_1	486
44	0.733333	5	161	984	0.984	677	0.677	27	24.5	486_1	486
46	0.766667	5	161	1045	1.045	715	0.715	27	25.2	486_1	486
47	0.783333	5	161	1152	1.152	795	0.795	33	29.3	486_1	486
50	0.833333	5	162	1154	1.154	796	0.796	33	29.3	486_1	486
54	0.9	5	162	1184	1.184	835	0.835	29	28.4	486_1	486
55	0.916667	5	163	1184	1.184	834	0.834	29	28.4	486_1	486
56	0.933333	5	163	1247	1.247	891	0.891	31	29.8	486_1	486
59	0.983333	5	164	1221	1.221	896	0.896	29	28.7	486_1	486
61	1.01667	5	164	1219	1.219	913	0.913	29	29.1	486_1	486
62	1.03333	5	164	1262	1.262	954	0.954	29	30.1	486_1	486
64	1.06667	5	164	1309	1.309	990	0.99	31	31.9	486_1	486
66	1.1	5	164	1178	1.178	947	0.947	35	32.2	486_1	486
68	1.13333	5	164	1103	1.103	895	0.895	30	29.5	486_1	486
71	1.18333	5	164	1097	1.097	886	0.886	28	28.6	486_1	486
73	1.21667	5	164	1132	1.132	917	0.917	30	30.3	486_1	486
75	1.25	5	164	1170	1.17	946	0.946	30	31	486_1	486
77	1.28333	5	164	1216	1.216	984	0.984	28	31.6	486_1	486
79	1.31667	5	164	1221	1.221	996	0.996	28	32	486_1	486
82	1.36667	5	164	1252	1.252	1022	1.022	27	32.8	486_1	486
84	1.4	5	164	1265	1.265	1050	1.05	29	34.2	486_1	486
86	1.43333	5	164	1267	1.267	1050	1.05	29	34.2	486_1	486
88	1.46667	5	164	1241	1.241	1044	1.044	30	34.3	486_1	486
90	1.5	5	164	1197	1.197	1025	1.025	32	34.2	486_1	486
92	1.53333	5	164	1209	1.209	1056	1.056	28	34.5	486_1	486
93	1.55	5	164	1195	1.195	1047	1.047	29	34.1	486_1	486
95	1.58333	5	164	1110	1.11	967	0.967	34	32.6	486_1	486
97	1.61667	5	165	1146	1.146	997	0.997	33	33.4	486_1	486
100	1.66667	5	165	1208	1.208	1045	1.045	33	34.4	486_1	486
102	1.7	5	165	1182	1.182	1032	1.032	32	34.2	486_1	486
103	1.71667	5	166	1196	1.196	1052	1.052	33	34.8	486_1	486
106	1.76667	5	166	1223	1.223	1092	1.092	31	35.6	486_1	486
107	1.78333	5	166	1167	1.167	1052	1.052	31	34.9	486_1	486
109	1.81667	5	166	1257	1.257	1130	1.13	31	36.6	486_1	486
111	1.85	5	167	1199	1.199	1090	1.09	31	35.7	486_1	486
113	1.88333	5	167	1165	1.165	1051	1.051	33	35.3	486_1	486
115	1.91667	5	168	1226	1.226	1101	1.101	33	36.7	486_1	486
116	1.93333	5	168	1172	1.172	1051	1.051	33	35.4	486_1	486
118	1.96667	5	168	1172	1.172	1051	1.051	33	35.4	486_1	486
120	2	5	168	1273	1.273	1148	1.148	34	38.9	486_1	486
121	2.01667	5	168	1260	1.26	1150	1.15	37	40.8	486_1	486
123	2.05	5	169	1275	1.275	1188	1.188	38	43.4	486_1	486
124	2.06667	5	169	1243	1.243	1191	1.191	39	44.4	486_1	486
126	2.1	5	170	1207	1.207	1182	1.182	40	44.7	486_1	486
127	2.11667	5	170	1225	1.225	1195	1.195	40	44.8	486_1	486
129	2.15	5	170	1139	1.139	1127	1.127	39	42.3	486_1	486
130	2.16667	5	170	1093	1.093	1083	1.083	37	39.5	486_1	486
131	2.18333	5	171	1093	1.093	1082	1.082	37	39.5	486_1	486
133	2.21667	5	171	1148	1.148	1116	1.116	36	39.2	486_1	486
136	2.26667	5	171	1092	1.092	1040	1.04	32	35.2	486_1	486
139	2.31667	5	171	1061	1.061	985	0.985	30	32.5	486_1	486
141	2.35	5	170	1101	1.101	1006	1.006	27	32.5	486_1	486
144	2.4	5	170	1095	1.095	985	0.985	25	30.9	486_1	486
146	2.43333	5	169	1199	1.199	1081	1.081	25	33.5	486_1	486
148	2.46667	5	168	1143	1.143	1016	1.016	25	31.1	486_1	486
150	2.5	5	168	1132	1.132	1004	1.004	25	30.5	486_1	486
153	2.55	5	168	1223	1.223	1078	1.078	25	32.4	486_1	486
155	2.58333	5	168	1255	1.255	1118	1.118	28	34.5	486_1	486
158	2.63333	5	169	1201	1.201	1065	1.065	27	32.4	486_1	486
160	2.66667	5	169	1285	1.285	1137	1.137	28	34.8	486_1	486
162	2.7	5	169	1227	1.227	1084	1.084	29	33.9	486_1	486
164	2.73333	5	169	1265	1.265	1125	1.125	30	35.5	486_1	486
166	2.76667	5	169	1210	1.21	1079	1.079	30	35.1	486_1	486
168	2.8	5	168	1183	1.183	1060	1.06	31	34.8	486_1	486
170	2.83333	5	168	1241	1.241	1094	1.094	29	34.9	486_1	486
172	2.86667	5	168	1256	1.256	1107	1.107	30	35.3	486_1	486
174	2.9	5.1	168	1239	1.239	1103	1.103	31	35.8	486_1	486
176	2.93333	5.1	168	1241	1.241	1117	1.117	30	36.3	486_1	486
178	2.96667	5.1	168	1217	1.217	1098	1.098	29	35.7	486_1	486
180	3	5.2	168	1232	1.232	1113	1.113	30	35.9	486_1	486
182	3.03333	5.2	168	1192	1.192	1080	1.08	30	35.1	486_1	486
185	3.08333	5.2	168	1204	1.204	1090	1.09	26	34.6	486_1	486
187	3.11667	5.3	168	1175	1.175	1072	1.072	27	34.3	486_1	486
188	3.13333	5.3	168	1140	1.14	1032	1.032	30	33.8	486_1	486
190	3.16667	5.3	168	1150	1.15	1025	1.025	32	33.5	486_1	486
192	3.2	5.4	168	1180	1.18	1038	1.038	33	33.7	486_1	486
194	3.23333	5.4	168	1202	1.202	1051	1.051	33	34.1	486_1	486
196	3.26667	5.4	168	1259	1.259	1109	1.109	29	35.1	486_1	486
197	3.28333	5.5	168	1182	1.182	1031	1.031	34	33.6	486_1	486
199	3.31667	5.5	168	1218	1.218	1065	1.065	32	34.3	486_1	486
201	3.35	5.5	168	1234	1.234	1084	1.084	33	34.8	486_1	486
203	3.38333	5.6	168	1230	1.23	1079	1.079	33	34.5	486_1	486
205	3.41667	5.6	168	1220	1.22	1068	1.068	32	33.9	486_1	486
207	3.45	5.6	168	1207	1.207	1054	1.054	32	33.6	486_1	486
209	3.48333	5.6	168	1178	1.178	1026	1.026	31	32.8	486_1	486
211	3.51667	5.7	168	1229	1.229	1082	1.082	30	34.3	486_1	486
213	3.55	5.7	168	1241	1.241	1095	1.095	31	35	486_1	486
215	3.58333	5.7	168	1241	1.241	1095	1.095	31	35	486_1	486
217	3.61667	5.8	168	1256	1.256	1127	1.127	30	36.1	486_1	486
219	3.65	5.8	168	1275	1.275	1165	1.165	30	37.4	486_1	486
221	3.68333	5.8	169	1256	1.256	1165	1.165	30	37.6	486_1	486
223	3.71667	5.9	169	1257	1.257	1165	1.165	30	37.6	486_1	486
225	3.75	5.9	170	1228	1.228	1144	1.144	31	37.1	486_1	486
227	3.78333	5.9	170	1239	1.239	1157	1.157	29	37.1	486_1	486
229	3.81667	6	171	1209	1.209	1128	1.128	30	36.3	486_1	486
231	3.85	6	171	1209	1.209	1128	1.128	30	36.3	486_1	486
233	3.88333	6	172	1172	1.172	1091	1.091	30	35.6	486_1	486
235	3.91667	6.1	172	1198	1.198	1114	1.114	30	36.4	486_1	486
236	3.93333	6.1	173	1198	1.198	1114	1.114	30	36.4	486_1	486
238	3.96667	6.1	173	1226	1.226	1145	1.145	31	37.6	486_1	486
239	3.98333	6.2	174	1249	1.249	1178	1.178	31	38.9	486_1	486
241	4.01667	6.2	174	1253	1.253	1190	1.19	33	39.7	486_1	486
243	4.05	6.2	174	1192	1.192	1140	1.14	32	38.3	486_1	486
245	4.08333	6.2	174	1171	1.171	1116	1.116	32	36.3	486_1	486
247	4.11667	6.3	174	1181	1.181	1114	1.114	32	35.8	486_1	486
249	4.15	6.3	174	1244	1.244	1176	1.176	33	38.6	486_1	486
251	4.18333	6.3	174	1219	1.219	1158	1.158	32	38.1	486_1	486
253	4.21667	6.4	174	1194	1.194	1144	1.144	32	37.9	486_1	486
255	4.25	6.4	174	1200	1.2	1150	1.15	32	37.7	486_1	486
257	4.28333	6.4	174	1254	1.254	1202	1.202	31	38.9	486_1	486
258	4.3	6.5	174	1280	1.28	1222	1.222	31	39.3	486_1	486
260	4.33333	6.5	174	1258	1.258	1198	1.198	32	38.8	486_1	486
262	4.36667	6.5	174	1235	1.235	1184	1.184	33	38.7	486_1	486
264	4.4	6.6	174	1248	1.248	1196	1.196	32	38.9	486_1	486
266	4.43333	6.6	175	1215	1.215	1170	1.17	32	38.2	486_1	486
268	4.46667	6.6	175	1237	1.237	1192	1.192	32	38.6	486_1	486
270	4.5	6.7	176	1204	1.204	1156	1.156	34	38	486_1	486
271	4.51667	6.7	176	1230	1.23	1178	1.178	34	38.4	486_1	486
273	4.55	6.7	177	1234	1.234	1181	1.181	34	38.5	486_1	486
276	4.6	6.8	177	1272	1.272	1224	1.224	30	39	486_1	486
278	4.63333	6.8	178	1220	1.22	1181	1.181	30	38.1	486_1	486
279	4.65	6.8	178	1232	1.232	1189	1.189	31	38.3	486_1	486
281	4.68333	6.8	178	1231	1.231	1179	1.179	32	38	486_1	486
282	4.7	6.9	178	1285	1.285	1223	1.223	32	39	486_1	486
284	4.73333	6.9	178	1273	1.273	1217	1.217	33	39.4	486_1	486
285	4.75	6.9	178	1294	1.294	1244	1.244	33	40.2	486_1	486
287	4.78333	6.9	178	1260	1.26	1214	1.214	39	40.8	486_1	486
288	4.8	7	178	1334	1.334	1273	1.273	38	41.7	486_1	486
290	4.83333	7	179	1332	1.332	1282	1.282	39	42.5	486_1	486
292	4.86667	7	179	1293	1.293	1259	1.259	40	42.7	486_1	486
294	4.9	7.1	180	1301	1.301	1283	1.283	39	43.2	486_1	486
295	4.91667	7.1	180	1337	1.337	1343	1.343	39	45.5	486_1	486
297	4.95	7.1	180	1360	1.36	1391	1.391	39	47.4	486_1	486
298	4.96667	7.1	180	1346	1.346	1362	1.362	34	44.4	486_1	486
299	4.98333	7.1	180	1304	1.304	1333	1.333	38	44.4	486_1	486
300	5	7.2	180	1361	1.361	1390	1.39	40	46.8	486_1	486
301	5.01667	7.2	180	1450	1.45	1514	1.514	45	53.5	486_1	486
303	5.05	7.2	180	1405	1.405	1469	1.469	46	52.5	486_1	486
305	5.08333	7.2	180	1362	1.362	1439	1.439	43	51.4	486_1	486
307	5.11667	7.3	180	1223	1.223	1267	1.267	37	44.2	486_1	486
309	5.15	7.3	180	1333	1.333	1370	1.37	44	48.4	486_1	486
311	5.18333	7.4	180	1379	1.379	1406	1.406	41	49.5	486_1	486
313	5.21667	7.4	180	1381	1.381	1407	1.407	38	49.2	486_1	486
314	5.23333	7.4	180	1383	1.383	1405	1.405	38	49	486_1	486
316	5.26667	7.4	180	1397	1.397	1412	1.412	38	48.6	486_1	486
317	5.28333	7.5	180	1363	1.363	1364	1.364	37	46.3	486_1	486
319	5.31667	7.5	180	1401	1.401	1395	1.395	37	46.8	486_1	486
321	5.35	7.5	180	1397	1.397	1398	1.398	36	46.8	486_1	486
323	5.38333	7.5	180	1405	1.405	1384	1.384	36	45.3	486_1	486
324	5.4	7.6	180	1423	1.423	1384	1.384	35	44.8	486_1	486
326	5.43333	7.6	180	1407	1.407	1375	1.375	33	44.1	486_1	486
328	5.46667	7.6	180	1404	1.404	1364	1.364	33	43.6	486_1	486
330	5.5	7.7	180	1419	1.419	1384	1.384	34	44.4	486_1	486
331	5.51667	7.7	180	1449	1.449	1408	1.408	34	45.7	486_1	486
333	5.55	7.7	180	1452	1.452	1417	1.417	34	46.6	486_1	486
335	5.58333	7.7	181	1421	1.421	1405	1.405	34	46.6	486_1	486
336	5.6	7.8	181	1427	1.427	1418	1.418	34	46.7	486_1	486
338	5.63333	7.8	182	1417	1.417	1411	1.411	36	47	486_1	486
340	5.66667	7.8	182	1461	1.461	1453	1.453	34	47.6	486_1	486
342	5.7	7.9	182	1473	1.473	1458	1.458	33	47.4	486_1	486
344	5.73333	7.9	182	1448	1.448	1432	1.432	35	46.8	486_1	486
345	5.75	7.9	182	1444	1.444	1425	1.425	35	46.1	486_1	486
347	5.78333	8	183	1462	1.462	1445	1.445	34	46.8	486_1	486
349	5.81667	8	183	1434	1.434	1423	1.423	34	46.4	486_1	486
351	5.85	8	184	1482	1.482	1471	1.471	32	47	486_1	486
352	5.86667	8	184	1461	1.461	1460	1.46	34	47.4	486_1	486
354	5.9	8.1	185	1462	1.462	1470	1.47	36	48	486_1	486
356	5.93333	8.1	186	1435	1.435	1443	1.443	37	47.7	486_1	486
357	5.95	8.1	186	1446	1.446	1463	1.463	36	47.8	486_1	486
358	5.96667	8.1	187	1509	1.509	1531	1.531	37	49.5	486_1	486
360	6	8.2	187	1562	1.562	1589	1.589	38	51.6	486_1	486
361	6.01667	8.2	187	1571	1.571	1605	1.605	40	53.1	486_1	486
362	6.03333	8.2	187	1535	1.535	1573	1.573	44	53.9	486_1	486
364	6.06667	8.2	187	1537	1.537	1583	1.583	45	55.5	486_1	486
365	6.08333	8.3	187	1597	1.597	1652	1.652	46	58.1	486_1	486
366	6.1	8.3	187	1611	1.611	1673	1.673	46	58.2	486_1	486
368	6.13333	8.3	188	1647	1.647	1718	1.718	46	59	486_1	486
369	6.15	8.3	188	1671	1.671	1748	1.748	45	59.3	486_1	486
370	6.16667	8.3	189	1649	1.649	1736	1.736	44	58.6	486_1	486
372	6.2	8.4	189	1591	1.591	1693	1.693	44	58.1	486_1	486
373	6.21667	8.4	189	1668	1.668	1773	1.773	44	60.3	486_1	486
375	6.25	8.4	189	1625	1.625	1765	1.765	43	61.7	486_1	486
376	6.26667	8.4	189	1638	1.638	1788	1.788	44	62.2	486_1	486
377	6.28333	8.5	189	1584	1.584	1754	1.754	44	62	486_1	486
379	6.31667	8.5	189	1564	1.564	1754	1.754	43	62	486_1	486
380	6.33333	8.5	190	1616	1.616	1801	1.801	43	63.6	486_1	486
381	6.35	8.5	190	1643	1.643	1828	1.828	43	64.4	486_1	486
383	6.38333	8.5	190	1591	1.591	1781	1.781	43	62.8	486_1	486
384	6.4	8.6	191	1637	1.637	1815	1.815	44	63.2	486_1	486
385	6.41667	8.6	191	1681	1.681	1856	1.856	44	65.1	486_1	486
387	6.45	8.6	192	1693	1.693	1868	1.868	44	66	486_1	486
388	6.46667	8.6	192	1704	1.704	1876	1.876	44	66.8	486_1	486
390	6.5	8.7	192	1694	1.694	1871	1.871	43	66.1	486_1	486
391	6.51667	8.7	192	1709	1.709	1891	1.891	43	67	486_1	486
392	6.53333	8.7	192	1721	1.721	1916	1.916	43	67.8	486_1	486
394	6.56667	8.7	192	1748	1.748	1949	1.949	44	69.1	486_1	486
395	6.58333	8.8	192	1732	1.732	1935	1.935	43	68.4	486_1	486
396	6.6	8.8	192	1745	1.745	1953	1.953	44	68.7	486_1	486
398	6.63333	8.8	193	1748	1.748	1962	1.962	45	69.2	486_1	486
399	6.65	8.8	193	1732	1.732	1937	1.937	46	68.9	486_1	486
400	6.66667	8.8	194	1746	1.746	1944	1.944	46	69.1	486_1	486
402	6.7	8.9	194	1729	1.729	1923	1.923	46	68.5	486_1	486
403	6.71667	8.9	194	1712	1.712	1912	1.912	44	67.8	486_1	486
404	6.73333	8.9	194	1717	1.717	1931	1.931	44	68.2	486_1	486
406	6.76667	8.9	194	1703	1.703	1919	1.919	43	68	486_1	486
407	6.78333	9	194	1693	1.693	1916	1.916	44	67.8	486_1	486
408	6.8	9	194	1705	1.705	1933	1.933	43	68.7	486_1	486
410	6.83333	9	194	1705	1.705	1933	1.933	43	68.7	486_1	486
411	6.85	9	194	1699	1.699	1927	1.927	43	67.9	486_1	486
412	6.86667	9	190	1678	1.678	1909	1.909	46	67.6	486_1	486
414	6.9	9.1	190	1705	1.705	1938	1.938	45	68.5	486_1	486
415	6.91667	9.1	190	1749	1.749	1969	1.969	47	68.9	486_1	486
416	6.93333	9.1	190	1779	1.779	1990	1.99	46	69.2	486_1	486
418	6.96667	9.1	190	1795	1.795	1993	1.993	46	69.2	486_1	486
419	6.98333	9.2	186	1777	1.777	1962	1.962	46	68.6	486_1	486
420	7	9.2	186	1786	1.786	1973	1.973	46	69.3	486_1	486
422	7.03333	9.2	186	1807	1.807	1999	1.999	46	70	486_1	486
423	7.05	9.2	186	1770	1.77	1960	1.96	45	69.3	486_1	486
424	7.06667	9.2	185	1771	1.771	1961	1.961	45	69.3	486_1	486
425	7.08333	9.3	185	1775	1.775	1961	1.961	46	69.4	486_1	486
427	7.11667	9.3	185	1788	1.788	1983	1.983	44	69.9	486_1	486
428	7.13333	9.3	190	1807	1.807	2014	2.014	45	71.1	486_1	486
430	7.16667	9.3	194	1832	1.832	2033	2.033	45	71.8	486_1	486
431	7.18333	9.4	194	1846	1.846	2059	2.059	45	72.8	486_1	486
432	7.2	9.4	194	1843	1.843	2065	2.065	45	73	486_1	486
434	7.23333	9.4	194	1851	1.851	2075	2.075	45	73.6	486_1	486
435	7.25	9.4	194	1838	1.838	2071	2.071	45	73.4	486_1	486
436	7.26667	9.4	194	1837	1.837	2066	2.066	46	73.2	486_1	486
438	7.3	9.5	194	1808	1.808	2037	2.037	45	72.3	486_1	486
439	7.31667	9.5	195	1801	1.801	2022	2.022	46	72.1	486_1	486
440	7.33333	9.5	195	1788	1.788	2005	2.005	46	71.8	486_1	486
441	7.35	9.5	195	1771	1.771	1989	1.989	46	71.3	486_1	486
443	7.38333	9.6	196	1755	1.755	1981	1.981	46	71.3	486_1	486
444	7.4	9.6	196	1791	1.791	2014	2.014	46	72.4	486_1	486
445	7.41667	9.6	197	1777	1.777	2009	2.009	46	72.9	486_1	486
447	7.45	9.6	197	1793	1.793	2026	2.026	46	74.2	486_1	486
448	7.46667	9.6	197	1794	1.794	2023	2.023	46	74.1	486_1	486
449	7.48333	9.7	197	1817	1.817	2053	2.053	46	74.7	486_1	486
451	7.51667	9.7	197	1817	1.817	2053	2.053	46	74.7	486_1	486
452	7.53333	9.7	197	1781	1.781	2009	2.009	46	73.2	486_1	486
453	7.55	9.7	197	1784	1.784	2009	2.009	46	73.4	486_1	486
454	7.56667	9.7	197	1815	1.815	2021	2.021	46	73.3	486_1	486
455	7.58333	5	197	1816	1.816	2016	2.016	46	72.5	486_1	486
457	7.61667	5	198	1822	1.822	2023	2.023	45	71	486_1	486
458	7.63333	5	198	1799	1.799	1983	1.983	44	68.5	486_1	486
460	7.66667	5	196	1845	1.845	2012	2.012	44	68.1	486_1	486
461	7.68333	5	196	1862	1.862	2026	2.026	44	68.9	486_1	486
462	7.7	5	196	1839	1.839	2000	2	43	67.9	486_1	486
464	7.73333	5	195	1839	1.839	2000	2	43	67.9	486_1	486
465	7.75	5	194	1854	1.854	2018	2.018	43	68.8	486_1	486
467	7.78333	5	193	1840	1.84	1995	1.995	43	68.3	486_1	486
469	7.81667	5	193	1834	1.834	1999	1.999	42	68.2	486_1	486
470	7.83333	5	192	1798	1.798	1983	1.983	39	67.8	486_1	486
472	7.86667	5	192	1805	1.805	1977	1.977	37	66.6	486_1	486
474	7.9	5	191	1780	1.78	1942	1.942	35	64.3	486_1	486
476	7.93333	5	191	1701	1.701	1830	1.83	33	58.7	486_1	486
477	7.95	5	190	1700	1.7	1829	1.829	33	58.7	486_1	486
478	7.96667	5	190	1678	1.678	1797	1.797	36	58.7	486_1	486
480	8	5	189	1578	1.578	1681	1.681	38	55.3	486_1	486
481	8.01667	5	189	1569	1.569	1682	1.682	41	57.2	486_1	486
482	8.03333	5	189	1571	1.571	1700	1.7	44	58.9	486_1	486
484	8.06667	5	188	1487	1.487	1648	1.648	48	60.5	486_1	486
485	8.08333	5	188	1469	1.469	1615	1.615	45	57.9	486_1	486
488	8.13333	5	187	1380	1.38	1500	1.5	39	50.7	486_1	486
489	8.15	5	187	1448	1.448	1575	1.575	38	52.6	486_1	486
490	8.16667	5	186	1594	1.594	1758	1.758	40	60.2	486_1	486
492	8.2	5	185	1523	1.523	1697	1.697	38	59.1	486_1	486
493	8.21667	5	184	1476	1.476	1663	1.663	36	58.3	486_1	486
495	8.25	5	183	1577	1.577	1793	1.793	36	62.3	486_1	486
496	8.26667	5	183	1664	1.664	1949	1.949	40	70.8	486_1	486
498	8.3	5	182	1666	1.666	1950	1.95	40	70.8	486_1	486
499	8.31667	5	181	1589	1.589	1895	1.895	40	69.9	486_1	486
500	8.33333	5	181	1558	1.558	1871	1.871	40	69.9	486_1	486
502	8.36667	5	180	1534	1.534	1882	1.882	41	71.2	486_1	486
504	8.4	5	180	1494	1.494	1857	1.857	43	71	486_1	486
506	8.43333	5	180	1468	1.468	1818	1.818	42	68.7	486_1	486
507	8.45	5	179	1449	1.449	1796	1.796	42	67.9	486_1	486
509	8.48333	5	178	1421	1.421	1764	1.764	42	66.8	486_1	486
510	8.5	5	178	1367	1.367	1686	1.686	39	63	486_1	486
512	8.53333	5	177	1315	1.315	1610	1.61	39	59.8	486_1	486
514	8.56667	5	176	1230	1.23	1484	1.484	35	52.9	486_1	486
516	8.6	5	176	1223	1.223	1473	1.473	40	54.7	486_1	486
517	8.61667	5	176	1232	1.232	1488	1.488	40	55.7	486_1	486
519	8.65	5	176	1175	1.175	1390	1.39	40	52.8	486_1	486
521	8.68333	5	176	1084	1.084	1259	1.259	35	46.6	486_1	486
523	8.71667	5	176	1149	1.149	1298	1.298	36	47.3	486_1	486
524	8.73333	5	176	1204	1.204	1329	1.329	37	48.1	486_1	486
525	8.75	5	176	1351	1.351	1482	1.482	43	55	486_1	486
527	8.78333	5	175	1430	1.43	1584	1.584	43	59.6	486_1	486
528	8.8	5	174	1308	1.308	1466	1.466	43	56.8	486_1	486
530	8.83333	5	173	1300	1.3	1463	1.463	43	56.3	486_1	486
532	8.86667	5	172	1300	1.3	1463	1.463	43	56.3	486_1	486
535	8.91667	5	171	1086	1.086	1224	1.224	35	46.4	486_1	486
537	8.95	5	170	1085	1.085	1223	1.223	35	46.4	486_1	486
539	8.98333	5	170	1142	1.142	1244	1.244	35	45.1	486_1	486
540	9	5	169	1156	1.156	1244	1.244	35	45.1	486_1	486
542	9.03333	5	168	1184	1.184	1271	1.271	34	45.8	486_1	486
543	9.05	5	167	1109	1.109	1190	1.19	34	44	486_1	486
545	9.08333	5	166	1199	1.199	1294	1.294	37	47.1	486_1	486
548	9.13333	5	166	1200	1.2	1295	1.295	37	47.1	486_1	486
550	9.16667	5	166	1149	1.149	1252	1.252	34	45.1	486_1	486
551	9.18333	5	166	1155	1.155	1251	1.251	33	44.5	486_1	486
552	9.2	5	165	1125	1.125	1226	1.226	33	44	486_1	486
555	9.25	5	165	1045	1.045	1117	1.117	32	38.6	486_1	486
557	9.28333	5	164	1099	1.099	1147	1.147	30	37.5	486_1	486
559	9.31667	5	164	1100	1.1	1114	1.114	32	36.6	486_1	486
561	9.35	5	163	1170	1.17	1178	1.178	33	39.3	486_1	486
565	9.41667	5	163	990	0.99	980	0.98	27	32.7	486_1	486
566	9.43333	5	163	990	0.99	980	0.98	27	32.7	486_1	486
567	9.45	5	163	983	0.983	961	0.961	28	31.8	486_1	486
569	9.48333	5	163	1189	1.189	1183	1.183	37	41.3	486_1	486
573	9.55	5	163	1055	1.055	1042	1.042	29	35.6	486_1	486
575	9.58333	5	163	1091	1.091	1069	1.069	29	36.4	486_1	486
576	9.6	5	163	1133	1.133	1114	1.114	29	38.8	486_1	486
577	9.61667	5	162	1383	1.383	1374	1.374	40	50.1	486_1	486
579	9.65	5	161	1313	1.313	1312	1.312	40	47.7	486_1	486
581	9.68333	5	160	1184	1.184	1196	1.196	37	43.6	486_1	486
582	9.7	5	160	1183	1.183	1212	1.212	37	43.5	486_1	486
583	9.71667	5	160	1295	1.295	1331	1.331	39	48.3	486_1	486
586	9.76667	5	159	1189	1.189	1264	1.264	41	47.9	486_1	486
588	9.8	5	159	1122	1.122	1206	1.206	39	45.5	486_1	486
589	9.81667	5	159	1104	1.104	1179	1.179	39	45.1	486_1	486
591	9.85	5	159	1093	1.093	1164	1.164	39	45.2	486_1	486
592	9.86667	5	159	1118	1.118	1187	1.187	38	46	486_1	486
594	9.9	5	158	1109	1.109	1189	1.189	38	45.9	486_1	486
596	9.93333	5	157	1064	1.064	1134	1.134	35	42.9	486_1	486
597	9.95	5	156	1125	1.125	1203	1.203	37	45.5	486_1	486
599	9.98333	5	155	1075	1.075	1164	1.164	38	44.8	486_1	486
601	10.0167	5	155	1012	1.012	1095	1.095	36	42.3	486_1	486
602	10.0333	5	155	966	0.966	1052	1.052	36	40.4	486_1	486
606	10.1	5	154	966	0.966	1052	1.052	36	40.4	486_1	486
609	10.15	5	154	911	0.911	936	0.936	29	33.4	486_1	486
612	10.2	5	154	927	0.927	956	0.956	31	34.5	486_1	486
613	10.2167	5	154	910	0.91	911	0.911	30	32.5	486_1	486
616	10.2667	5	154	895	0.895	865	0.865	27	30.2	486_1	486
619	10.3167	5	154	898	0.898	830	0.83	25	27.8	486_1	486
620	10.3333	5	154	894	0.894	802	0.802	25	26.8	486_1	486
622	10.3667	5	154	1040	1.04	931	0.931	26	31.2	486_1	486
623	10.3833	5	154	1166	1.166	1044	1.044	29	35.5	486_1	486
626	10.4333	5	154	1014	1.014	928	0.928	30	32.3	486_1	486
627	10.45	5	154	1038	1.038	955	0.955	30	33.2	486_1	486
629	10.4833	5	153	1107	1.107	1019	1.019	33	36.5	486_1	486
631	10.5167	5	153	1162	1.162	1100	1.1	40	42.2	486_1	486
632	10.5333	5	153	1236	1.236	1197	1.197	40	46.1	486_1	486
633	10.55	5	153	1163	1.163	1159	1.159	41	45.9	486_1	486
635	10.5833	5	153	1112	1.112	1116	1.116	40	44.2	486_1	486
636	10.6	5	153	1122	1.122	1125	1.125	40	44.6	486_1	486
637	10.6167	5	153	1097	1.097	1122	1.122	41	45.6	486_1	486
639	10.65	5	153	1054	1.054	1097	1.097	42	45.7	486_1	486
641	10.6833	5	153	1034	1.034	1088	1.088	41	44.5	486_1	486
642	10.7	5	153	999	0.999	1048	1.048	40	42.3	486_1	486
644	10.7333	5	153	995	0.995	1038	1.038	38	41.2	486_1	486
646	10.7667	5	152	985	0.985	1018	1.018	37	39.9	486_1	486
647	10.7833	5	152	964	0.964	996	0.996	38	39.4	486_1	486
649	10.8167	5	151	935	0.935	957	0.957	37	37.6	486_1	486
651	10.85	5	151	920	0.92	922	0.922	36	36	486_1	486
653	10.8833	5	151	917	0.917	898	0.898	35	34.6	486_1	486
655	10.9167	5	151	949	0.949	907	0.907	34	34.5	486_1	486
656	10.9333	5	151	948	0.948	906	0.906	34	34.5	486_1	486
658	10.9667	5	152	978	0.978	916	0.916	34	34.4	486_1	486
660	11	5	152	1033	1.033	951	0.951	33	35.2	486_1	486
662	11.0333	5	153	1037	1.037	956	0.956	33	35.2	486_1	486
663	11.05	5	153	1033	1.033	946	0.946	33	34.8	486_1	486
665	11.0833	5	153	1073	1.073	980	0.98	34	36.3	486_1	486
666	11.1	5	154	1093	1.093	994	0.994	35	37	486_1	486
668	11.1333	5	154	1103	1.103	1006	1.006	36	37.9	486_1	486
670	11.1667	5	155	1085	1.085	998	0.998	35	37.6	486_1	486
671	11.1833	5	155	1027	1.027	940	0.94	35	36.1	486_1	486
673	11.2167	5	156	1080	1.08	988	0.988	38	38.8	486_1	486
674	11.2333	5	156	1080	1.08	988	0.988	38	38.8	486_1	486
677	11.2833	5	156	1012	1.012	930	0.93	39	37.8	486_1	486
680	11.3333	5	156	974	0.974	861	0.861	35	33.8	486_1	486
682	11.3667	5	156	972	0.972	860	0.86	35	33.8	486_1	486
684	11.4	5	155	1024	1.024	892	0.892	38	35.3	486_1	486
686	11.4333	5	154	1076	1.076	945	0.945	35	36.1	486_1	486
689	11.4833	5	154	987	0.987	858	0.858	31	31.8	486_1	486
690	11.5	5	154	1036	1.036	898	0.898	29	32.2	486_1	486
693	11.55	5	153	1092	1.092	944	0.944	29	32.5	486_1	486
695	11.5833	5	153	1123	1.123	986	0.986	30	34.2	486_1	486
697	11.6167	5	153	1124	1.124	986	0.986	30	34.2	486_1	486
698	11.6333	5	153	1119	1.119	983	0.983	30	34.2	486_1	486
701	11.6833	5	152	1142	1.142	1012	1.012	29	35.3	486_1	486
702	11.7	5	152	1163	1.163	1051	1.051	33	39.3	486_1	486
704	11.7333	5	152	1182	1.182	1087	1.087	35	41.3	486_1	486
705	11.75	5	152	1183	1.183	1088	1.088	35	41.3	486_1	486
707	11.7833	5	152	1200	1.2	1134	1.134	35	43.6	486_1	486
708	11.8	5	152	1145	1.145	1103	1.103	35	42.7	486_1	486
710	11.8333	5	152	1120	1.12	1078	1.078	35	41.9	486_1	486
712	11.8667	5	152	1063	1.063	1037	1.037	38	41.2	486_1	486
713	11.8833	5	152	1088	1.088	1069	1.069	38	42	486_1	486
715	11.9167	5	151	1043	1.043	1031	1.031	38	41	486_1	486
717	11.95	5	151	1069	1.069	1051	1.051	37	40.9	486_1	486
718	11.9667	5	151	1033	1.033	1013	1.013	37	39.8	486_1	486
720	12	5	151	1028	1.028	1005	1.005	37	39.4	486_1	486
722	12.0333	5	151	984	0.984	953	0.953	36	37.4	486_1	486
724	12.0667	5	151	969	0.969	922	0.922	35	35.7	486_1	486
725	12.0833	5	152	968	0.968	922	0.922	35	35.7	486_1	486
727	12.1167	5	153	1008	1.008	939	0.939	35	36.1	486_1	486
730	12.1667	5	154	989	0.989	917	0.917	30	34.8	486_1	486
733	12.2167	5	155	963	0.963	886	0.886	29	33.2	486_1	486
734	12.2333	5	155	1001	1.001	905	0.905	29	33.3	486_1	486
736	12.2667	5	155	1029	1.029	917	0.917	30	33.5	486_1	486
738	12.3	5	155	1020	1.02	901	0.901	30	32.9	486_1	486
740	12.3333	5	155	1041	1.041	905	0.905	29	32.4	486_1	486
742	12.3667	5	154	1017	1.017	887	0.887	28	31.9	486_1	486
744	12.4	5	154	1029	1.029	871	0.871	32	31.5	486_1	486
746	12.4333	5	153	1084	1.084	923	0.923	32	33	486_1	486
747	12.45	5	153	1107	1.107	944	0.944	32	33.8	486_1	486
749	12.4833	5	153	1112	1.112	953	0.953	32	34.3	486_1	486
751	12.5167	5	153	1134	1.134	981	0.981	33	35.1	486_1	486
753	12.55	5	153	1099	1.099	949	0.949	32	34.4	486_1	486
754	12.5667	5	153	1071	1.071	931	0.931	34	34.4	486_1	486
756	12.6	5	153	1107	1.107	965	0.965	34	35.1	486_1	486
758	12.6333	5	152	1097	1.097	962	0.962	34	35.4	486_1	486
760	12.6667	5	152	1064	1.064	939	0.939	34	35.1	486_1	486
761	12.6833	5	151	1026	1.026	907	0.907	34	34.5	486_1	486
763	12.7167	5	151	970	0.97	854	0.854	34	32.8	486_1	486
765	12.75	5	151	1005	1.005	879	0.879	35	33.6	486_1	486
