# Supplementary material for: On the development of diagnostic support algorithms based on CPET biosignals data via machine learning and wavelets
Source: PeerJ journal article supplement (doi:10.7717/peerj-cs.2474), 2025-01-30
Supplement: raw_data.zip [file Subject_32.xlsx]

## Sheet: Folha1
time	time	Speed	HR	VO2	VO2	VCO2	VCO2	RR	VE	ID_test	ID
	min	km/h	/min	ml/min	L/min	ml/min	L/min	/min	L/min
0	0	0	83	293	0.293	288	0.288	30	12.8	609_1	609
2	0.0333333	0	89	315	0.315	312	0.312	30	13.9	609_1	609
4	0.0666667	0	88	292	0.292	286	0.286	30	12.8	609_1	609
6	0.1	0	87	304	0.304	299	0.299	30	13.4	609_1	609
8	0.133333	0	86	324	0.324	320	0.32	30	14	609_1	609
10	0.166667	0	84	329	0.329	326	0.326	30	14.2	609_1	609
12	0.2	0	82	349	0.349	354	0.354	29	14.8	609_1	609
17	0.283333	0	78	327	0.327	331	0.331	28	14.2	609_1	609
21	0.35	0	76	266	0.266	277	0.277	22	11.8	609_1	609
25	0.416667	0	75	262	0.262	272	0.272	20	11.2	609_1	609
28	0.466667	0	74	234	0.234	240	0.24	19	10	609_1	609
31	0.516667	0	75	211	0.211	216	0.216	17	9.1	609_1	609
35	0.583333	0	75	203	0.203	206	0.206	16	8.4	609_1	609
39	0.65	0	76	200	0.2	201	0.201	15	8	609_1	609
42	0.7	0	78	222	0.222	217	0.217	16	8.6	609_1	609
46	0.766667	0	79	229	0.229	221	0.221	18	8.9	609_1	609
50	0.833333	0	79	229	0.229	221	0.221	18	8.9	609_1	609
55	0.916667	0	79	244	0.244	231	0.231	16	8.6	609_1	609
57	0.95	0	79	244	0.244	228	0.228	17	8.8	609_1	609
63	1.05	0	77	243	0.243	225	0.225	19	8.7	609_1	609
65	1.08333	0	75	254	0.254	232	0.232	22	9.3	609_1	609
68	1.13333	0	72	241	0.241	222	0.222	20	8.7	609_1	609
71	1.18333	0	71	231	0.231	212	0.212	20	8.4	609_1	609
73	1.21667	0	70	236	0.236	216	0.216	21	8.5	609_1	609
75	1.25	0	70	204	0.204	185	0.185	26	8.6	609_1	609
80	1.33333	0	71	207	0.207	191	0.191	21	8.1	609_1	609
83	1.38333	0	73	211	0.211	196	0.196	21	8.3	609_1	609
86	1.43333	0	72	209	0.209	192	0.192	20	8.1	609_1	609
88	1.46667	0	74	207	0.207	190	0.19	25	8.6	609_1	609
89	1.48333	0	77	201	0.201	184	0.184	27	9	609_1	609
93	1.55	0	78	195	0.195	184	0.184	25	9.1	609_1	609
99	1.65	0	80	217	0.217	206	0.206	23	9.4	609_1	609
104	1.73333	0	79	285	0.285	270	0.27	20	10.1	609_1	609
105	1.75	0	79	279	0.279	261	0.261	23	10.2	609_1	609
107	1.78333	0	79	289	0.289	270	0.27	25	11.1	609_1	609
110	1.83333	0	78	311	0.311	288	0.288	22	11.3	609_1	609
111	1.85	0	76	329	0.329	304	0.304	23	11.5	609_1	609
114	1.9	0	75	328	0.328	304	0.304	23	11.5	609_1	609
116	1.93333	0	74	299	0.299	265	0.265	32	12.6	609_1	609
118	1.96667	0	73	311	0.311	276	0.276	31	13	609_1	609
120	2	0	72	325	0.325	292	0.292	29	13.1	609_1	609
123	2.05	0	71	321	0.321	293	0.293	26	12.5	609_1	609
126	2.1	0	70	303	0.303	278	0.278	26	12.2	609_1	609
128	2.13333	0	69	289	0.289	266	0.266	25	11.7	609_1	609
131	2.18333	0	69	304	0.304	284	0.284	24	12.3	609_1	609
149	2.48333	0	70	292	0.292	275	0.275	24	11.9	609_1	609
151	2.51667	0	71	275	0.275	260	0.26	24	11.5	609_1	609
158	2.63333	0	72	256	0.256	248	0.248	19	10	609_1	609
161	2.68333	0	75	255	0.255	248	0.248	19	10	609_1	609
163	2.71667	0	78	253	0.253	245	0.245	20	10.1	609_1	609
167	2.78333	0	81	266	0.266	258	0.258	18	9.9	609_1	609
168	2.8	0	84	266	0.266	258	0.258	18	9.9	609_1	609
169	2.81667	0	88	283	0.283	275	0.275	20	10.4	609_1	609
171	2.85	0	91	299	0.299	289	0.289	20	10.9	609_1	609
172	2.86667	0	93	318	0.318	294	0.294	31	12.7	609_1	609
173	2.88333	0	93	364	0.364	333	0.333	35	14.2	609_1	609
175	2.91667	0	93	475	0.475	422	0.422	47	18.2	609_1	609
178	2.96667	0	92	475	0.475	422	0.422	47	18.2	609_1	609
182	3.03333	0	91	381	0.381	384	0.384	33	17	609_1	609
184	3.06667	0	87	337	0.337	342	0.342	30	15.5	609_1	609
186	3.1	0	84	335	0.335	348	0.348	30	15.6	609_1	609
188	3.13333	0	84	327	0.327	338	0.338	27	15	609_1	609
190	3.16667	0	83	304	0.304	316	0.316	24	13.8	609_1	609
192	3.2	0	81	273	0.273	266	0.266	30	12.6	609_1	609
197	3.28333	0	79	289	0.289	279	0.279	23	11.8	609_1	609
199	3.31667	0	80	291	0.291	277	0.277	22	11.7	609_1	609
202	3.36667	0	80	304	0.304	287	0.287	22	11.9	609_1	609
204	3.4	0	80	290	0.29	275	0.275	23	11.7	609_1	609
206	3.43333	0	79	301	0.301	285	0.285	28	13	609_1	609
208	3.46667	0	79	312	0.312	295	0.295	28	13.4	609_1	609
210	3.5	0	80	302	0.302	286	0.286	22	12.2	609_1	609
212	3.53333	0	80	305	0.305	288	0.288	28	12.9	609_1	609
214	3.56667	0	77	306	0.306	289	0.289	28	12.9	609_1	609
216	3.6	0	75	300	0.3	281	0.281	28	12.8	609_1	609
218	3.63333	0	74	302	0.302	281	0.281	28	12.5	609_1	609
220	3.66667	0	72	300	0.3	276	0.276	27	12.2	609_1	609
223	3.71667	0	69	277	0.277	255	0.255	28	11.7	609_1	609
226	3.76667	0	69	273	0.273	250	0.25	26	11	609_1	609
229	3.81667	0	69	260	0.26	233	0.233	25	10.6	609_1	609
232	3.86667	0	69	248	0.248	220	0.22	24	10.1	609_1	609
235	3.91667	0	68	222	0.222	196	0.196	21	8.9	609_1	609
240	4	0	68	177	0.177	155	0.155	18	7.2	609_1	609
243	4.05	0	68	178	0.178	154	0.154	18	7	609_1	609
246	4.1	0	68	172	0.172	145	0.145	17	6.7	609_1	609
249	4.15	0	69	208	0.208	176	0.176	20	8	609_1	609
252	4.2	0	72	210	0.21	176	0.176	19	8	609_1	609
254	4.23333	0	75	218	0.218	181	0.181	19	8.1	609_1	609
257	4.28333	0	78	251	0.251	207	0.207	21	9	609_1	609
259	4.31667	0	82	289	0.289	240	0.24	22	10.2	609_1	609
261	4.35	4.9	84	324	0.324	274	0.274	24	11.5	609_1	609
263	4.38333	4.9	85	373	0.373	322	0.322	27	13.3	609_1	609
265	4.41667	4.9	87	390	0.39	345	0.345	28	14.1	609_1	609
266	4.43333	4.9	89	421	0.421	378	0.378	30	15.2	609_1	609
268	4.46667	4.9	90	451	0.451	407	0.407	32	16	609_1	609
270	4.5	4.9	92	475	0.475	425	0.425	32	16.5	609_1	609
272	4.53333	4.9	94	500	0.5	447	0.447	33	17.2	609_1	609
274	4.56667	4.9	96	509	0.509	453	0.453	32	17	609_1	609
276	4.6	4.9	97	498	0.498	438	0.438	33	16.7	609_1	609
278	4.63333	4.9	99	517	0.517	454	0.454	32	17.1	609_1	609
280	4.66667	4.9	100	539	0.539	473	0.473	31	17.4	609_1	609
282	4.7	4.9	101	549	0.549	481	0.481	31	17.7	609_1	609
284	4.73333	4.9	102	573	0.573	499	0.499	31	18.1	609_1	609
289	4.81667	4.9	103	561	0.561	490	0.49	30	17.8	609_1	609
291	4.85	4.9	103	591	0.591	510	0.51	31	18.2	609_1	609
293	4.88333	4.9	103	614	0.614	530	0.53	29	18.5	609_1	609
295	4.91667	4.9	103	612	0.612	521	0.521	30	18.3	609_1	609
297	4.95	4.9	102	615	0.615	513	0.513	32	18.2	609_1	609
299	4.98333	4.9	101	645	0.645	530	0.53	31	18.5	609_1	609
301	5.01667	4.9	100	644	0.644	529	0.529	31	18.5	609_1	609
303	5.05	4.9	99	643	0.643	531	0.531	30	18.4	609_1	609
305	5.08333	4.9	98	633	0.633	516	0.516	30	18.2	609_1	609
307	5.11667	4.9	97	643	0.643	516	0.516	31	18.1	609_1	609
309	5.15	4.9	97	656	0.656	526	0.526	30	18.2	609_1	609
311	5.18333	4.9	97	667	0.667	535	0.535	29	18.2	609_1	609
314	5.23333	4.9	97	674	0.674	539	0.539	28	18.1	609_1	609
316	5.26667	4.9	97	674	0.674	539	0.539	28	18.1	609_1	609
318	5.3	4.9	96	696	0.696	555	0.555	29	18.4	609_1	609
320	5.33333	4.9	96	721	0.721	574	0.574	29	18.9	609_1	609
322	5.36667	4.9	95	732	0.732	591	0.591	28	19.3	609_1	609
324	5.4	4.9	94	729	0.729	586	0.586	28	19.1	609_1	609
326	5.43333	4.9	94	722	0.722	586	0.586	28	19.1	609_1	609
328	5.46667	4.9	94	705	0.705	575	0.575	28	18.7	609_1	609
331	5.51667	4.9	95	666	0.666	545	0.545	27	17.9	609_1	609
333	5.55	6.1	96	638	0.638	521	0.521	27	17.4	609_1	609
335	5.58333	6.1	97	638	0.638	521	0.521	27	17.4	609_1	609
336	5.6	6.1	99	666	0.666	534	0.534	29	17.7	609_1	609
338	5.63333	6.1	102	711	0.711	565	0.565	30	18.8	609_1	609
340	5.66667	6.1	103	772	0.772	621	0.621	31	20.3	609_1	609
342	5.7	6.1	104	833	0.833	676	0.676	32	22	609_1	609
343	5.71667	6.1	106	895	0.895	736	0.736	34	24	609_1	609
345	5.75	6.1	107	895	0.895	739	0.739	34	24	609_1	609
347	5.78333	6.1	108	868	0.868	733	0.733	34	24.2	609_1	609
349	5.81667	6.1	108	843	0.843	715	0.715	35	23.8	609_1	609
351	5.85	6.1	109	826	0.826	713	0.713	33	23.4	609_1	609
352	5.86667	6.1	109	823	0.823	716	0.716	34	23.4	609_1	609
354	5.9	6.1	110	822	0.822	716	0.716	33	23.4	609_1	609
356	5.93333	6.1	110	828	0.828	721	0.721	33	23.4	609_1	609
358	5.96667	6.1	110	837	0.837	729	0.729	32	23.3	609_1	609
360	6	6.1	110	839	0.839	736	0.736	31	23.1	609_1	609
362	6.03333	6.1	110	844	0.844	743	0.743	31	23.1	609_1	609
364	6.06667	6.1	111	854	0.854	751	0.751	31	23.5	609_1	609
366	6.1	6.1	111	866	0.866	762	0.762	31	23.7	609_1	609
368	6.13333	6.1	111	858	0.858	760	0.76	30	23.4	609_1	609
370	6.16667	6.1	112	856	0.856	759	0.759	30	23.3	609_1	609
372	6.2	6.1	112	870	0.87	771	0.771	31	23.7	609_1	609
374	6.23333	6.1	112	868	0.868	771	0.771	31	23.9	609_1	609
376	6.26667	6.1	112	870	0.87	785	0.785	31	24.2	609_1	609
378	6.3	6.1	112	887	0.887	799	0.799	31	24.4	609_1	609
380	6.33333	6.1	112	887	0.887	799	0.799	31	24.3	609_1	609
382	6.36667	6.1	111	899	0.899	810	0.81	31	24.6	609_1	609
384	6.4	6.1	111	879	0.879	796	0.796	31	24.4	609_1	609
386	6.43333	6.1	111	844	0.844	760	0.76	30	23.1	609_1	609
388	6.46667	6.1	110	861	0.861	765	0.765	29	22.9	609_1	609
390	6.5	6.1	111	885	0.885	765	0.765	29	22.8	609_1	609
392	6.53333	6.1	111	884	0.884	765	0.765	29	22.8	609_1	609
394	6.56667	7	112	876	0.876	756	0.756	29	22.6	609_1	609
396	6.6	7	114	918	0.918	787	0.787	28	23.2	609_1	609
398	6.63333	7	115	964	0.964	831	0.831	30	24.7	609_1	609
399	6.65	7	116	975	0.975	850	0.85	32	25.7	609_1	609
401	6.68333	7	117	1016	1.016	891	0.891	33	26.8	609_1	609
403	6.71667	7	118	1025	1.025	909	0.909	34	27.6	609_1	609
405	6.75	7	119	979	0.979	873	0.873	34	26.8	609_1	609
406	6.76667	7	120	1029	1.029	918	0.918	36	28.1	609_1	609
408	6.8	7	121	1038	1.038	943	0.943	37	28.9	609_1	609
409	6.81667	7	122	1051	1.051	964	0.964	37	29.6	609_1	609
411	6.85	7	123	1058	1.058	983	0.983	36	29.9	609_1	609
413	6.88333	7	124	1037	1.037	973	0.973	36	30	609_1	609
415	6.91667	7	124	1034	1.034	984	0.984	35	30.1	609_1	609
416	6.93333	7	125	1066	1.066	1016	1.016	36	31	609_1	609
418	6.96667	7	125	1042	1.042	988	0.988	35	30.2	609_1	609
420	7	7	125	1038	1.038	982	0.982	35	29.9	609_1	609
421	7.01667	7	125	1044	1.044	989	0.989	35	30.1	609_1	609
423	7.05	7	125	1069	1.069	1011	1.011	36	30.7	609_1	609
425	7.08333	7	126	1101	1.101	1042	1.042	37	31.3	609_1	609
426	7.1	7	126	1105	1.105	1046	1.046	37	31.5	609_1	609
428	7.13333	7	126	1085	1.085	1024	1.024	37	30.9	609_1	609
430	7.16667	7	126	1103	1.103	1035	1.035	37	31	609_1	609
431	7.18333	7	126	1099	1.099	1021	1.021	37	30.3	609_1	609
433	7.21667	7	127	1109	1.109	1031	1.031	36	30.3	609_1	609
435	7.25	7	127	1087	1.087	1005	1.005	36	29.4	609_1	609
436	7.26667	7	127	1108	1.108	1018	1.018	35	29.7	609_1	609
438	7.3	7	128	1157	1.157	1055	1.055	35	30.2	609_1	609
440	7.33333	7	128	1179	1.179	1074	1.074	34	30.2	609_1	609
442	7.36667	7	129	1211	1.211	1101	1.101	34	30.8	609_1	609
444	7.4	7	129	1240	1.24	1130	1.13	34	31.6	609_1	609
445	7.41667	7	130	1210	1.21	1106	1.106	33	30.9	609_1	609
447	7.45	7	130	1220	1.22	1114	1.114	34	31.7	609_1	609
449	7.48333	7	130	1203	1.203	1103	1.103	34	31	609_1	609
451	7.51667	7	130	1189	1.189	1097	1.097	33	30.7	609_1	609
453	7.55	7	130	1224	1.224	1130	1.13	33	31.5	609_1	609
455	7.58333	7	131	1222	1.222	1129	1.129	33	31.4	609_1	609
456	7.6	8	132	1237	1.237	1145	1.145	33	31.7	609_1	609
458	7.63333	8	132	1306	1.306	1207	1.207	35	33.4	609_1	609
461	7.68333	8	133	1303	1.303	1209	1.209	34	33.1	609_1	609
463	7.71667	8	133	1347	1.347	1241	1.241	35	33.4	609_1	609
465	7.75	8	133	1416	1.416	1318	1.318	36	35.3	609_1	609
466	7.76667	8	133	1501	1.501	1380	1.38	36	35.8	609_1	609
468	7.8	8	133	1524	1.524	1398	1.398	36	36.2	609_1	609
470	7.83333	8	133	1497	1.497	1380	1.38	36	35.5	609_1	609
471	7.85	8	134	1446	1.446	1327	1.327	36	34.5	609_1	609
473	7.88333	8	134	1419	1.419	1323	1.323	35	35	609_1	609
475	7.91667	8	134	1421	1.421	1324	1.324	35	35	609_1	609
477	7.95	8	135	1373	1.373	1297	1.297	35	35.1	609_1	609
478	7.96667	8	135	1370	1.37	1294	1.294	35	34.9	609_1	609
480	8	8	135	1390	1.39	1315	1.315	35	35.4	609_1	609
482	8.03333	8	134	1371	1.371	1296	1.296	34	34.6	609_1	609
484	8.06667	8	134	1392	1.392	1310	1.31	33	34.3	609_1	609
486	8.1	8	134	1399	1.399	1306	1.306	33	34	609_1	609
488	8.13333	8	134	1448	1.448	1347	1.347	33	34.9	609_1	609
490	8.16667	8	134	1454	1.454	1350	1.35	33	34.7	609_1	609
491	8.18333	8	133	1470	1.47	1370	1.37	33	35	609_1	609
493	8.21667	8	133	1474	1.474	1376	1.376	33	35.2	609_1	609
495	8.25	8	133	1512	1.512	1421	1.421	33	36.4	609_1	609
497	8.28333	8	134	1523	1.523	1443	1.443	33	37.2	609_1	609
499	8.31667	8	134	1516	1.516	1454	1.454	33	37.6	609_1	609
500	8.33333	8	134	1510	1.51	1447	1.447	33	37.4	609_1	609
502	8.36667	8	134	1491	1.491	1448	1.448	33	37.6	609_1	609
504	8.4	8	135	1461	1.461	1428	1.428	33	37.2	609_1	609
506	8.43333	8	135	1458	1.458	1424	1.424	33	37	609_1	609
508	8.46667	8	135	1444	1.444	1418	1.418	33	36.8	609_1	609
510	8.5	8	135	1433	1.433	1407	1.407	33	36.4	609_1	609
512	8.53333	8	135	1433	1.433	1404	1.404	32	36.1	609_1	609
514	8.56667	8	135	1422	1.422	1397	1.397	31	35.9	609_1	609
516	8.6	8	135	1399	1.399	1369	1.369	31	35.1	609_1	609
518	8.63333	9	135	1416	1.416	1370	1.37	31	34.9	609_1	609
519	8.65	9	135	1416	1.416	1370	1.37	31	34.9	609_1	609
521	8.68333	9	136	1448	1.448	1391	1.391	32	35.5	609_1	609
523	8.71667	9	136	1479	1.479	1418	1.418	33	36.1	609_1	609
524	8.73333	9	136	1500	1.5	1440	1.44	34	36.9	609_1	609
527	8.78333	9	137	1455	1.455	1421	1.421	31	36.2	609_1	609
529	8.81667	9	138	1455	1.455	1421	1.421	31	36.2	609_1	609
531	8.85	9	138	1445	1.445	1409	1.409	31	35.7	609_1	609
533	8.88333	9	138	1445	1.445	1408	1.408	31	35.7	609_1	609
535	8.91667	9	138	1430	1.43	1385	1.385	30	34.6	609_1	609
537	8.95	9	138	1459	1.459	1399	1.399	30	34.6	609_1	609
539	8.98333	9	139	1456	1.456	1400	1.4	29	34.7	609_1	609
540	9	9	139	1549	1.549	1475	1.475	32	36.7	609_1	609
542	9.03333	9	139	1570	1.57	1524	1.524	33	38.6	609_1	609
544	9.06667	9	139	1565	1.565	1521	1.521	32	38.3	609_1	609
547	9.11667	9	140	1471	1.471	1459	1.459	31	36.9	609_1	609
549	9.15	9	140	1504	1.504	1489	1.489	32	37.5	609_1	609
550	9.16667	9	140	1499	1.499	1451	1.451	32	36	609_1	609
552	9.2	9	140	1495	1.495	1459	1.459	32	36.3	609_1	609
554	9.23333	9	140	1459	1.459	1413	1.413	30	34.9	609_1	609
557	9.28333	9	140	1437	1.437	1378	1.378	29	33.5	609_1	609
559	9.31667	9	140	1474	1.474	1397	1.397	29	33.5	609_1	609
561	9.35	9	140	1473	1.473	1397	1.397	29	33.5	609_1	609
563	9.38333	9	140	1466	1.466	1377	1.377	29	33.1	609_1	609
565	9.41667	9	139	1509	1.509	1412	1.412	29	33.7	609_1	609
567	9.45	9	139	1416	1.416	1335	1.335	28	32.3	609_1	609
570	9.5	9	139	1417	1.417	1339	1.339	26	31.8	609_1	609
572	9.53333	9	139	1436	1.436	1337	1.337	27	31.7	609_1	609
573	9.55	9	139	1487	1.487	1369	1.369	28	32.3	609_1	609
575	9.58333	9	140	1561	1.561	1432	1.432	28	33.6	609_1	609
577	9.61667	10.1	141	1591	1.591	1462	1.462	28	34.4	609_1	609
579	9.65	10.1	142	1596	1.596	1487	1.487	29	35.6	609_1	609
580	9.66667	10.1	144	1707	1.707	1591	1.591	34	39.1	609_1	609
582	9.7	10.1	145	1726	1.726	1649	1.649	34	41.2	609_1	609
584	9.73333	10.1	146	1712	1.712	1673	1.673	35	42.1	609_1	609
586	9.76667	10.1	147	1714	1.714	1726	1.726	35	43.7	609_1	609
587	9.78333	10.1	148	1756	1.756	1771	1.771	35	44.6	609_1	609
589	9.81667	10.1	148	1740	1.74	1773	1.773	34	44.4	609_1	609
591	9.85	10.1	149	1723	1.723	1782	1.782	34	44.5	609_1	609
592	9.86667	10.1	149	1705	1.705	1765	1.765	35	44.2	609_1	609
594	9.9	10.1	150	1732	1.732	1795	1.795	35	44.6	609_1	609
596	9.93333	10.1	150	1732	1.732	1795	1.795	35	44.6	609_1	609
597	9.95	10.1	151	1731	1.731	1804	1.804	36	45	609_1	609
599	9.98333	10.1	151	1715	1.715	1803	1.803	36	45.3	609_1	609
601	10.0167	10.1	152	1703	1.703	1797	1.797	36	45.2	609_1	609
602	10.0333	10.1	152	1708	1.708	1810	1.81	37	45.6	609_1	609
604	10.0667	10.1	153	1729	1.729	1842	1.842	36	46.5	609_1	609
606	10.1	10.1	153	1698	1.698	1806	1.806	36	45.6	609_1	609
608	10.1333	10.1	153	1687	1.687	1794	1.794	36	45.1	609_1	609
609	10.15	10.1	153	1684	1.684	1778	1.778	36	44.6	609_1	609
611	10.1833	10.1	153	1700	1.7	1787	1.787	36	44.4	609_1	609
613	10.2167	10.1	153	1728	1.728	1807	1.807	36	44.9	609_1	609
614	10.2333	10.1	153	1689	1.689	1749	1.749	37	43.6	609_1	609
616	10.2667	10.1	152	1688	1.688	1749	1.749	37	43.6	609_1	609
617	10.2833	10.1	153	1718	1.718	1782	1.782	37	44.8	609_1	609
619	10.3167	10.1	153	1777	1.777	1859	1.859	37	46.7	609_1	609
620	10.3333	10.1	152	1766	1.766	1868	1.868	37	47.5	609_1	609
622	10.3667	10.1	152	1747	1.747	1862	1.862	38	47.8	609_1	609
624	10.4	10.1	152	1721	1.721	1847	1.847	37	47.2	609_1	609
626	10.4333	10.1	152	1721	1.721	1847	1.847	37	47.2	609_1	609
628	10.4667	10.1	151	1625	1.625	1754	1.754	34	44.7	609_1	609
630	10.5	10.1	151	1645	1.645	1746	1.746	33	43.4	609_1	609
631	10.5167	10.1	151	1644	1.644	1746	1.746	33	43.4	609_1	609
633	10.55	10.1	151	1681	1.681	1750	1.75	33	42.8	609_1	609
635	10.5833	10.1	152	1704	1.704	1764	1.764	32	43.1	609_1	609
636	10.6	10.1	152	1706	1.706	1761	1.761	32	43.1	609_1	609
638	10.6333	11.1	153	1769	1.769	1835	1.835	34	44.9	609_1	609
640	10.6667	11.1	153	1765	1.765	1855	1.855	35	46.1	609_1	609
641	10.6833	11.1	154	1837	1.837	1908	1.908	36	47.1	609_1	609
643	10.7167	11.1	155	1845	1.845	1947	1.947	37	48.6	609_1	609
644	10.7333	11.1	155	1767	1.767	1907	1.907	37	48.6	609_1	609
646	10.7667	11.1	156	1775	1.775	1936	1.936	38	49.4	609_1	609
648	10.8	11.1	157	1776	1.776	1936	1.936	38	49.4	609_1	609
650	10.8333	11.1	157	1779	1.779	1915	1.915	39	48.9	609_1	609
651	10.85	11.1	158	1806	1.806	1936	1.936	40	49.5	609_1	609
653	10.8833	11.1	158	1803	1.803	1924	1.924	40	48.8	609_1	609
654	10.9	11.1	158	1811	1.811	1909	1.909	40	48.2	609_1	609
656	10.9333	11.1	158	1850	1.85	1928	1.928	40	47.8	609_1	609
657	10.95	11.1	158	1829	1.829	1915	1.915	40	47.8	609_1	609
659	10.9833	11.1	158	1821	1.821	1912	1.912	40	48.2	609_1	609
660	11	11.1	158	1847	1.847	1938	1.938	40	48.1	609_1	609
662	11.0333	11.1	158	1814	1.814	1902	1.902	38	46.9	609_1	609
663	11.05	11.1	158	1814	1.814	1901	1.901	38	46.9	609_1	609
665	11.0833	11.1	158	1836	1.836	1924	1.924	37	47.5	609_1	609
667	11.1167	11.1	159	1857	1.857	1944	1.944	38	48	609_1	609
668	11.1333	11.1	159	1855	1.855	1944	1.944	37	47.8	609_1	609
670	11.1667	11.1	159	1896	1.896	1998	1.998	38	49.7	609_1	609
671	11.1833	11.1	160	1892	1.892	1986	1.986	38	49.1	609_1	609
673	11.2167	11.1	160	1925	1.925	2024	2.024	39	50.2	609_1	609
675	11.25	11.1	161	1894	1.894	1993	1.993	38	49.1	609_1	609
676	11.2667	11.1	161	1887	1.887	1996	1.996	38	49.5	609_1	609
677	11.2833	11.1	161	1855	1.855	1972	1.972	38	49.3	609_1	609
679	11.3167	11.1	162	1873	1.873	1993	1.993	39	50	609_1	609
680	11.3333	11.1	161	1867	1.867	1986	1.986	39	49.6	609_1	609
682	11.3667	11.1	161	1874	1.874	1996	1.996	39	49.9	609_1	609
683	11.3833	11.1	161	1897	1.897	2022	2.022	40	50.9	609_1	609
685	11.4167	11.1	161	1923	1.923	2060	2.06	40	51.3	609_1	609
687	11.45	11.1	161	1889	1.889	2035	2.035	39	50.8	609_1	609
688	11.4667	11.1	160	1889	1.889	2035	2.035	39	50.8	609_1	609
690	11.5	11.1	160	1915	1.915	2068	2.068	38	51.4	609_1	609
692	11.5333	11.1	160	1892	1.892	2044	2.044	38	50.8	609_1	609
693	11.55	11.1	160	1836	1.836	1999	1.999	36	49.5	609_1	609
695	11.5833	11.1	160	1869	1.869	2019	2.019	35	49.3	609_1	609
697	11.6167	12	160	1890	1.89	2025	2.025	36	49.6	609_1	609
698	11.6333	12	160	1926	1.926	2058	2.058	37	50.6	609_1	609
699	11.65	12	160	1935	1.935	2078	2.078	37	51.3	609_1	609
701	11.6833	12	161	1921	1.921	2069	2.069	37	50.7	609_1	609
702	11.7	12	162	2019	2.019	2164	2.164	40	53.2	609_1	609
704	11.7333	12	163	2026	2.026	2182	2.182	38	53.5	609_1	609
705	11.75	12	163	1983	1.983	2160	2.16	41	53.9	609_1	609
707	11.7833	12	164	1972	1.972	2164	2.164	42	54.2	609_1	609
708	11.8	12	165	1973	1.973	2165	2.165	42	54.2	609_1	609
709	11.8167	12	165	1997	1.997	2172	2.172	44	54.4	609_1	609
711	11.85	12	165	2007	2.007	2184	2.184	44	54.6	609_1	609
713	11.8833	12	165	1979	1.979	2167	2.167	42	54.3	609_1	609
715	11.9167	12	165	1976	1.976	2128	2.128	44	52.7	609_1	609
716	11.9333	12	165	1989	1.989	2141	2.141	44	53	609_1	609
717	11.95	12	165	2046	2.046	2179	2.179	44	53	609_1	609
718	11.9667	12	165	2045	2.045	2169	2.169	45	53	609_1	609
720	12	12	165	2045	2.045	2172	2.172	44	53.4	609_1	609
721	12.0167	12	165	2038	2.038	2165	2.165	44	53.2	609_1	609
723	12.05	12	165	2059	2.059	2205	2.205	44	54.6	609_1	609
724	12.0667	12	165	2060	2.06	2206	2.206	44	54.6	609_1	609
726	12.1	12	166	2023	2.023	2188	2.188	43	54.7	609_1	609
727	12.1167	12	166	2024	2.024	2189	2.189	43	54.7	609_1	609
728	12.1333	12	165	2015	2.015	2188	2.188	42	54.2	609_1	609
731	12.1833	12	165	1963	1.963	2134	2.134	42	52.4	609_1	609
732	12.2	12	164	1988	1.988	2160	2.16	42	53.1	609_1	609
733	12.2167	12	164	2100	2.1	2249	2.249	42	54.3	609_1	609
735	12.25	12	164	2216	2.216	2358	2.358	43	56.9	609_1	609
736	12.2667	12	164	2234	2.234	2379	2.379	44	57.8	609_1	609
737	12.2833	12	164	2211	2.211	2361	2.361	44	57.6	609_1	609
739	12.3167	12	164	2264	2.264	2427	2.427	45	59.4	609_1	609
740	12.3333	12	164	2264	2.264	2427	2.427	45	59.4	609_1	609
741	12.35	12	165	2166	2.166	2378	2.378	46	59.4	609_1	609
743	12.3833	12	165	2083	2.083	2323	2.323	45	58.3	609_1	609
744	12.4	12	165	2017	2.017	2261	2.261	44	57.2	609_1	609
746	12.4333	12	165	1980	1.98	2219	2.219	44	55.3	609_1	609
747	12.45	12	165	2012	2.012	2255	2.255	44	55.4	609_1	609
749	12.4833	12	166	1958	1.958	2210	2.21	42	54.7	609_1	609
750	12.5	12	166	1984	1.984	2235	2.235	43	55	609_1	609
751	12.5167	12	166	1969	1.969	2220	2.22	42	54.4	609_1	609
753	12.55	12	167	1982	1.982	2228	2.228	42	54.4	609_1	609
754	12.5667	12	167	2002	2.002	2264	2.264	42	55.4	609_1	609
755	12.5833	12	168	2039	2.039	2293	2.293	45	56.2	609_1	609
757	12.6167	12	168	2014	2.014	2274	2.274	44	55.7	609_1	609
758	12.6333	13	168	2014	2.014	2274	2.274	44	55.7	609_1	609
760	12.6667	13	168	2015	2.015	2279	2.279	44	55.9	609_1	609
761	12.6833	13	168	2034	2.034	2297	2.297	45	56.2	609_1	609
762	12.7	13	168	2043	2.043	2316	2.316	45	56.9	609_1	609
764	12.7333	13	169	2032	2.032	2311	2.311	45	56.9	609_1	609
765	12.75	13	169	2016	2.016	2300	2.3	44	56.4	609_1	609
766	12.7667	13	169	2013	2.013	2301	2.301	43	56.1	609_1	609
768	12.8	13	169	2019	2.019	2301	2.301	45	56.6	609_1	609
769	12.8167	13	169	1999	1.999	2275	2.275	45	56.1	609_1	609
770	12.8333	13	169	1999	1.999	2275	2.275	45	56.1	609_1	609
771	12.85	13	169	2011	2.011	2291	2.291	45	56.7	609_1	609
773	12.8833	13	169	2001	2.001	2286	2.286	47	57.3	609_1	609
774	12.9	13	169	1994	1.994	2279	2.279	47	57	609_1	609
775	12.9167	13	169	1997	1.997	2281	2.281	47	57	609_1	609
777	12.95	13	169	2016	2.016	2305	2.305	47	57.6	609_1	609
778	12.9667	13	169	2028	2.028	2328	2.328	46	58	609_1	609
779	12.9833	13	170	2000	2	2295	2.295	46	56.8	609_1	609
781	13.0167	13	170	1971	1.971	2269	2.269	45	56.1	609_1	609
783	13.05	13	171	1994	1.994	2289	2.289	44	56.1	609_1	609
784	13.0667	13	171	2007	2.007	2300	2.3	44	56.7	609_1	609
785	13.0833	13	171	2063	2.063	2347	2.347	45	57.7	609_1	609
787	13.1167	13	171	2023	2.023	2303	2.303	44	56.5	609_1	609
788	13.1333	13	170	2023	2.023	2299	2.299	45	56.6	609_1	609
789	13.15	13	170	2049	2.049	2333	2.333	45	57.5	609_1	609
791	13.1833	13	169	2111	2.111	2411	2.411	46	59.2	609_1	609
792	13.2	13	169	2042	2.042	2343	2.343	45	57.8	609_1	609
793	13.2167	13	170	2061	2.061	2354	2.354	45	57.1	609_1	609
795	13.25	13	170	2059	2.059	2332	2.332	45	56.2	609_1	609
796	13.2667	13	169	2112	2.112	2408	2.408	45	57.4	609_1	609
797	13.2833	13	169	2140	2.14	2450	2.45	45	58.3	609_1	609
799	13.3167	13	170	2151	2.151	2459	2.459	46	58.4	609_1	609
800	13.3333	13	170	2090	2.09	2387	2.387	45	56.8	609_1	609
801	13.35	13	170	2156	2.156	2463	2.463	46	57.9	609_1	609
803	13.3833	13	169	2189	2.189	2509	2.509	46	59.2	609_1	609
804	13.4	13	170	2192	2.192	2533	2.533	46	59.9	609_1	609
805	13.4167	13	170	2202	2.202	2541	2.541	47	60.5	609_1	609
807	13.45	13	171	2148	2.148	2498	2.498	46	59.8	609_1	609
808	13.4667	13	170	2131	2.131	2490	2.49	46	59.7	609_1	609
809	13.4833	13	170	2154	2.154	2508	2.508	46	60	609_1	609
810	13.5	13	170	2168	2.168	2520	2.52	46	60.5	609_1	609
812	13.5333	13	171	2126	2.126	2493	2.493	47	60.9	609_1	609
813	13.55	13	170	2110	2.11	2500	2.5	48	61.8	609_1	609
814	13.5667	13	170	2099	2.099	2504	2.504	48	61.6	609_1	609
815	13.5833	13	170	2099	2.099	2504	2.504	48	61.6	609_1	609
816	13.6	13	171	2083	2.083	2498	2.498	49	61.5	609_1	609
818	13.6333	13	170	2099	2.099	2520	2.52	48	62	609_1	609
819	13.65	13	171	2099	2.099	2504	2.504	47	60.8	609_1	609
820	13.6667	14.1	171	2085	2.085	2492	2.492	47	60.5	609_1	609
822	13.7	14.1	171	2085	2.085	2492	2.492	47	60.5	609_1	609
823	13.7167	14.1	171	2070	2.07	2465	2.465	47	60.2	609_1	609
824	13.7333	14.1	171	2070	2.07	2459	2.459	47	60	609_1	609
825	13.75	14.1	171	2083	2.083	2478	2.478	47	60.4	609_1	609
827	13.7833	14.1	171	2044	2.044	2436	2.436	47	59.9	609_1	609
828	13.8	14.1	171	2057	2.057	2455	2.455	48	60.8	609_1	609
829	13.8167	14.1	171	2079	2.079	2476	2.476	47	60.7	609_1	609
831	13.85	14.1	171	2088	2.088	2477	2.477	47	60.5	609_1	609
832	13.8667	14.1	171	2107	2.107	2500	2.5	46	60.9	609_1	609
833	13.8833	14.1	172	2106	2.106	2500	2.5	46	60.7	609_1	609
835	13.9167	14.1	172	2147	2.147	2546	2.546	46	61.5	609_1	609
836	13.9333	14.1	172	2197	2.197	2613	2.613	47	63.1	609_1	609
837	13.95	14.1	172	2162	2.162	2580	2.58	46	62.7	609_1	609
839	13.9833	14.1	172	2154	2.154	2580	2.58	46	62.3	609_1	609
840	14	14.1	172	2105	2.105	2526	2.526	45	61.2	609_1	609
841	14.0167	14.1	172	2091	2.091	2515	2.515	45	60.4	609_1	609
842	14.0333	14.1	171	2139	2.139	2571	2.571	46	61.7	609_1	609
844	14.0667	14.1	171	2137	2.137	2572	2.572	45	61.3	609_1	609
845	14.0833	14.1	172	2116	2.116	2549	2.549	45	60.9	609_1	609
846	14.1	14.1	172	2122	2.122	2559	2.559	46	60.9	609_1	609
847	14.1167	14.1	172	2134	2.134	2581	2.581	48	62	609_1	609
849	14.15	14.1	171	2173	2.173	2624	2.624	49	63.5	609_1	609
850	14.1667	14.1	172	2173	2.173	2624	2.624	49	63.5	609_1	609
851	14.1833	14.1	172	2174	2.174	2643	2.643	49	63.9	609_1	609
852	14.2	14.1	173	2136	2.136	2619	2.619	49	63.8	609_1	609
854	14.2333	14.1	173	2117	2.117	2621	2.621	46	63.1	609_1	609
855	14.25	14.1	173	2138	2.138	2648	2.648	47	64	609_1	609
856	14.2667	14.1	173	2146	2.146	2662	2.662	47	63.6	609_1	609
857	14.2833	14.1	173	2158	2.158	2670	2.67	47	63.2	609_1	609
858	14.3	14.1	173	2158	2.158	2670	2.67	47	63.2	609_1	609
860	14.3333	14.1	173	2124	2.124	2638	2.638	47	63.5	609_1	609
861	14.35	14.1	173	2152	2.152	2666	2.666	48	63.7	609_1	609
862	14.3667	14.1	173	2146	2.146	2660	2.66	52	65.1	609_1	609
863	14.3833	14.1	173	2179	2.179	2706	2.706	51	65	609_1	609
864	14.4	14.1	174	2162	2.162	2695	2.695	51	65.4	609_1	609
865	14.4167	14.1	174	2107	2.107	2651	2.651	52	65.6	609_1	609
867	14.45	14.1	174	2161	2.161	2716	2.716	51	66.2	609_1	609
868	14.4667	14.1	174	2152	2.152	2716	2.716	51	65.8	609_1	609
869	14.4833	14.1	174	2124	2.124	2698	2.698	51	66	609_1	609
870	14.5	14.1	174	2161	2.161	2741	2.741	50	65.9	609_1	609
871	14.5167	14.1	174	2160	2.16	2744	2.744	50	65.6	609_1	609
873	14.55	14.1	174	2168	2.168	2757	2.757	50	65.8	609_1	609
874	14.5667	14.1	174	2188	2.188	2784	2.784	50	66.4	609_1	609
875	14.5833	14.1	174	2197	2.197	2796	2.796	50	66	609_1	609
876	14.6	14.1	174	2186	2.186	2785	2.785	50	66	609_1	609
877	14.6167	14.1	174	2207	2.207	2806	2.806	49	65.5	609_1	609
879	14.65	14.1	174	2207	2.207	2802	2.802	49	65.5	609_1	609
880	14.6667	14.1	174	2190	2.19	2795	2.795	49	65.7	609_1	609
881	14.6833	14.1	174	2196	2.196	2810	2.81	50	66.1	609_1	609
882	14.7	14.1	174	2169	2.169	2773	2.773	51	65.6	609_1	609
883	14.7167	14.1	175	2160	2.16	2762	2.762	51	65.4	609_1	609
884	14.7333	14.1	174	2159	2.159	2762	2.762	51	65.4	609_1	609
891	14.85	4.9	174	2097	2.097	2698	2.698	52	65.5	609_1	609
893	14.8833	4.9	175	2038	2.038	2659	2.659	51	65.4	609_1	609
894	14.9	4.9	175	1972	1.972	2584	2.584	49	64	609_1	609
896	14.9333	4.9	175	1895	1.895	2507	2.507	47	63	609_1	609
897	14.95	4.9	175	1838	1.838	2459	2.459	44	61.1	609_1	609
898	14.9667	4.9	175	1838	1.838	2458	2.458	44	61.1	609_1	609
900	15	4.9	175	1881	1.881	2526	2.526	44	61.3	609_1	609
901	15.0167	4.9	174	1940	1.94	2605	2.605	44	61.9	609_1	609
902	15.0333	4.9	173	1901	1.901	2560	2.56	44	60.3	609_1	609
904	15.0667	4.9	173	1800	1.8	2426	2.426	43	56.4	609_1	609
905	15.0833	4.9	171	1942	1.942	2601	2.601	45	60	609_1	609
906	15.1	4.9	170	2047	2.047	2731	2.731	46	62.2	609_1	609
908	15.1333	4.9	170	1981	1.981	2657	2.657	43	60.5	609_1	609
910	15.1667	4.9	169	1818	1.818	2441	2.441	41	55.7	609_1	609
911	15.1833	4.9	169	1793	1.793	2403	2.403	40	54.8	609_1	609
913	15.2167	4.9	169	1831	1.831	2451	2.451	41	56	609_1	609
914	15.2333	4.9	168	1857	1.857	2499	2.499	41	57.6	609_1	609
916	15.2667	4.9	168	1861	1.861	2535	2.535	40	59	609_1	609
917	15.2833	4.9	167	1819	1.819	2479	2.479	40	58	609_1	609
919	15.3167	4.9	167	1749	1.749	2418	2.418	39	57	609_1	609
920	15.3333	4.9	167	1791	1.791	2497	2.497	41	59.3	609_1	609
922	15.3667	4.9	166	1727	1.727	2446	2.446	42	59.5	609_1	609
923	15.3833	4.9	165	1630	1.63	2320	2.32	40	56.5	609_1	609
925	15.4167	4.9	164	1602	1.602	2296	2.296	40	56	609_1	609
927	15.45	4.9	163	1603	1.603	2278	2.278	39	54.8	609_1	609
928	15.4667	4.9	163	1588	1.588	2243	2.243	38	53.6	609_1	609
930	15.5	4.9	162	1580	1.58	2216	2.216	40	54	609_1	609
931	15.5167	4.9	161	1526	1.526	2135	2.135	39	52.5	609_1	609
933	15.55	4.9	161	1428	1.428	2014	2.014	37	49.5	609_1	609
935	15.5833	4.9	160	1412	1.412	1989	1.989	36	48.6	609_1	609
937	15.6167	4.9	159	1429	1.429	2018	2.018	38	50.1	609_1	609
938	15.6333	4.9	158	1378	1.378	1966	1.966	37	49.3	609_1	609
940	15.6667	4.9	157	1347	1.347	1929	1.929	36	48.3	609_1	609
942	15.7	4.9	156	1314	1.314	1884	1.884	35	46.5	609_1	609
944	15.7333	4.9	155	1285	1.285	1840	1.84	34	44.8	609_1	609
946	15.7667	4.9	154	1268	1.268	1818	1.818	33	44.5	609_1	609
948	15.8	4.9	153	1205	1.205	1741	1.741	32	43.2	609_1	609
951	15.85	4.9	152	1146	1.146	1648	1.648	30	40.2	609_1	609
953	15.8833	4.9	150	1150	1.15	1636	1.636	29	39.2	609_1	609
955	15.9167	4.9	149	1109	1.109	1588	1.588	29	38.6	609_1	609
957	15.95	4.9	148	1160	1.16	1638	1.638	29	39.4	609_1	609
958	15.9667	4.9	148	1149	1.149	1622	1.622	30	39.8	609_1	609
960	16	4.9	148	1160	1.16	1635	1.635	30	40.4	609_1	609
962	16.0333	4.9	148	1204	1.204	1713	1.713	33	43.7	609_1	609
963	16.05	4.9	149	1221	1.221	1760	1.76	34	45.8	609_1	609
965	16.0833	4.9	149	1174	1.174	1705	1.705	33	45	609_1	609
967	16.1167	4.9	149	1197	1.197	1762	1.762	35	47	609_1	609
969	16.15	4.9	149	1168	1.168	1740	1.74	35	46.9	609_1	609
971	16.1833	4.9	147	1105	1.105	1679	1.679	34	46.2	609_1	609
974	16.2333	4.9	146	1027	1.027	1571	1.571	32	43.4	609_1	609
975	16.25	4.9	146	1017	1.017	1529	1.529	31	41.7	609_1	609
977	16.2833	4.9	145	1017	1.017	1505	1.505	30	40.6	609_1	609
980	16.3333	4.9	144	1015	1.015	1470	1.47	30	39	609_1	609
982	16.3667	4.9	143	988	0.988	1410	1.41	30	37.3	609_1	609
984	16.4	4.9	142	933	0.933	1331	1.331	29	35.4	609_1	609
986	16.4333	4.9	141	962	0.962	1350	1.35	29	35.7	609_1	609
988	16.4667	4.9	140	962	0.962	1350	1.35	29	35.7	609_1	609
991	16.5167	4.9	140	956	0.956	1327	1.327	28	34.8	609_1	609
993	16.55	4.9	139	948	0.948	1299	1.299	27	33.9	609_1	609
995	16.5833	4.9	138	967	0.967	1305	1.305	27	33.9	609_1	609
997	16.6167	4.9	138	981	0.981	1324	1.324	27	34.2	609_1	609
1000	16.6667	4.9	138	949	0.949	1277	1.277	25	32.7	609_1	609
1003	16.7167	4.9	138	941	0.941	1249	1.249	25	31.7	609_1	609
1004	16.7333	4.9	138	1003	1.003	1338	1.338	27	34.1	609_1	609
1006	16.7667	4.9	137	1029	1.029	1365	1.365	29	35.3	609_1	609
1008	16.8	4.9	137	1054	1.054	1411	1.411	31	37.4	609_1	609
1009	16.8167	4.9	137	1056	1.056	1428	1.428	32	38.7	609_1	609
1011	16.85	4.9	137	1038	1.038	1398	1.398	32	38.6	609_1	609
1013	16.8833	4.9	137	1056	1.056	1449	1.449	33	41.2	609_1	609
1015	16.9167	4.9	137	1068	1.068	1462	1.462	33	41.1	609_1	609
1017	16.95	4.9	136	1032	1.032	1430	1.43	33	41	609_1	609
1019	16.9833	4.9	135	1033	1.033	1431	1.431	33	41	609_1	609
1021	17.0167	4.9	135	1017	1.017	1418	1.418	33	40.7	609_1	609
1023	17.05	4.9	133	1004	1.004	1404	1.404	32	40.3	609_1	609
1025	17.0833	4.9	132	995	0.995	1390	1.39	32	39.8	609_1	609
1027	17.1167	4.9	131	954	0.954	1338	1.338	31	38.3	609_1	609
1029	17.15	4.9	130	938	0.938	1311	1.311	30	37.6	609_1	609
1031	17.1833	4.9	129	912	0.912	1270	1.27	30	36.3	609_1	609
1033	17.2167	4.9	129	878	0.878	1221	1.221	29	34.8	609_1	609
1035	17.25	4.9	128	860	0.86	1181	1.181	29	33.6	609_1	609
1037	17.2833	4.9	128	867	0.867	1183	1.183	29	33.7	609_1	609
1039	17.3167	4.9	129	898	0.898	1203	1.203	29	34	609_1	609
1041	17.35	4.9	129	927	0.927	1230	1.23	30	34.9	609_1	609
1044	17.4	4.9	128	881	0.881	1167	1.167	29	33	609_1	609
1046	17.4333	4.9	128	908	0.908	1182	1.182	29	33.2	609_1	609
1050	17.5	4.9	128	909	0.909	1176	1.176	26	32.6	609_1	609
1052	17.5333	4.9	128	892	0.892	1153	1.153	26	31.9	609_1	609
1054	17.5667	4.9	127	887	0.887	1151	1.151	26	32	609_1	609
1055	17.5833	4.9	127	902	0.902	1145	1.145	27	31.7	609_1	609
1057	17.6167	4.9	127	893	0.893	1113	1.113	27	30.8	609_1	609
1059	17.65	4.9	127	937	0.937	1161	1.161	28	32.3	609_1	609
1061	17.6833	4.9	127	942	0.942	1167	1.167	28	33	609_1	609
1063	17.7167	4.9	127	986	0.986	1212	1.212	34	35.6	609_1	609
1064	17.7333	4.9	127	1003	1.003	1229	1.229	35	36.1	609_1	609
1066	17.7667	4.9	128	944	0.944	1180	1.18	34	35.4	609_1	609
1069	17.8167	4.9	128	901	0.901	1127	1.127	32	33.3	609_1	609
1071	17.85	4.9	130	857	0.857	1065	1.065	31	31.3	609_1	609
1072	17.8667	4.9	130	853	0.853	1054	1.054	32	31.1	609_1	609
1075	17.9167	4.9	130	784	0.784	952	0.952	28	27.2	609_1	609
1077	17.95	4.9	131	809	0.809	957	0.957	28	26.8	609_1	609
1078	17.9667	4.9	131	808	0.808	957	0.957	28	26.8	609_1	609
1080	18	4.9	130	910	0.91	1079	1.079	31	30.6	609_1	609
1082	18.0333	4.9	129	960	0.96	1126	1.126	33	32.4	609_1	609
1084	18.0667	4.9	129	1014	1.014	1202	1.202	34	35	609_1	609
