# Supplementary material for: On the development of diagnostic support algorithms based on CPET biosignals data via machine learning and wavelets
Source: PeerJ journal article supplement (doi:10.7717/peerj-cs.2474), 2025-01-30
Supplement: raw_data.zip [file Subject_33.xlsx]

## Sheet: Folha1
time	time	Speed	HR	VO2	VO2	VCO2	VCO2	RR	VE	ID_test	ID
	min	km/h	/min	ml/min	L/min	ml/min	L/min	/min	L/min
0	0	0	73	421	0.421	432	0.432	18	15.6	651_1	651
5	0.0833333	0	67	203	0.203	216	0.216	13	9.1	651_1	651
9	0.15	0	71	350	0.35	384	0.384	15	13.9	651_1	651
13	0.216667	0	71	302	0.302	333	0.333	15	12.7	651_1	651
16	0.266667	0	72	292	0.292	319	0.319	17	12.6	651_1	651
17	0.283333	0	75	266	0.266	289	0.289	16	11.6	651_1	651
21	0.35	0	75	274	0.274	299	0.299	16	12	651_1	651
24	0.4	0	75	265	0.265	290	0.29	16	11.8	651_1	651
26	0.433333	0	76	270	0.27	296	0.296	19	12.5	651_1	651
30	0.5	0	76	262	0.262	288	0.288	19	12.2	651_1	651
35	0.583333	0	77	275	0.275	301	0.301	20	12.7	651_1	651
38	0.633333	0	76	271	0.271	304	0.304	19	12.6	651_1	651
43	0.716667	0	72	260	0.26	297	0.297	16	11.8	651_1	651
49	0.816667	0	71	225	0.225	259	0.259	14	10.4	651_1	651
53	0.883333	0	70	194	0.194	224	0.224	14	9.4	651_1	651
57	0.95	0	67	194	0.194	224	0.224	14	9.4	651_1	651
61	1.01667	0	65	179	0.179	205	0.205	14	8.8	651_1	651
66	1.1	0	64	158	0.158	177	0.177	13	7.9	651_1	651
71	1.18333	0	63	141	0.141	151	0.151	13	7.1	651_1	651
77	1.28333	0	63	133	0.133	140	0.14	12	6.6	651_1	651
83	1.38333	0	62	126	0.126	124	0.124	12	6	651_1	651
88	1.46667	0	62	133	0.133	131	0.131	12	6.1	651_1	651
92	1.53333	0	62	148	0.148	140	0.14	12	6.3	651_1	651
96	1.6	0	62	143	0.143	130	0.13	12	6.1	651_1	651
97	1.61667	0	63	160	0.16	143	0.143	12	6.5	651_1	651
100	1.66667	0	65	171	0.171	151	0.151	14	7	651_1	651
104	1.73333	0	67	187	0.187	162	0.162	17	7.9	651_1	651
109	1.81667	0	68	201	0.201	175	0.175	17	8.1	651_1	651
112	1.86667	0	68	193	0.193	167	0.167	17	8.1	651_1	651
117	1.95	0	68	204	0.204	176	0.176	17	8.2	651_1	651
121	2.01667	0	72	229	0.229	201	0.201	16	8.7	651_1	651
127	2.11667	0	77	241	0.241	211	0.211	15	8.8	651_1	651
132	2.2	0	80	251	0.251	221	0.221	14	8.9	651_1	651
134	2.23333	0	81	251	0.251	221	0.221	14	8.9	651_1	651
136	2.26667	4.9	85	288	0.288	251	0.251	15	9.9	651_1	651
137	2.28333	4.9	90	355	0.355	308	0.308	19	12	651_1	651
139	2.31667	4.9	93	429	0.429	371	0.371	24	15	651_1	651
140	2.33333	4.9	95	508	0.508	437	0.437	31	17.8	651_1	651
142	2.36667	4.9	96	638	0.638	551	0.551	36	21.7	651_1	651
144	2.4	4.9	100	639	0.639	553	0.553	35	21.4	651_1	651
146	2.43333	4.9	104	651	0.651	565	0.565	33	21.5	651_1	651
148	2.46667	4.9	105	628	0.628	539	0.539	32	20.3	651_1	651
151	2.51667	4.9	106	651	0.651	553	0.553	28	19.8	651_1	651
153	2.55	4.9	106	638	0.638	547	0.547	29	19.9	651_1	651
155	2.58333	4.9	106	658	0.658	558	0.558	29	20.3	651_1	651
157	2.61667	4.9	105	673	0.673	565	0.565	28	20.3	651_1	651
159	2.65	4.9	103	701	0.701	590	0.59	28	21.1	651_1	651
161	2.68333	4.9	102	711	0.711	606	0.606	29	21.9	651_1	651
163	2.71667	4.9	101	726	0.726	622	0.622	29	22.3	651_1	651
165	2.75	4.9	101	725	0.725	626	0.626	31	22.8	651_1	651
167	2.78333	4.9	100	718	0.718	625	0.625	30	22.8	651_1	651
169	2.81667	4.9	100	724	0.724	631	0.631	30	22.9	651_1	651
171	2.85	4.9	99	719	0.719	631	0.631	30	22.7	651_1	651
174	2.9	4.9	99	720	0.72	631	0.631	30	22.7	651_1	651
176	2.93333	4.9	100	717	0.717	625	0.625	30	22.4	651_1	651
178	2.96667	4.9	100	730	0.73	638	0.638	28	22.3	651_1	651
180	3	4.9	100	711	0.711	636	0.636	28	22.3	651_1	651
182	3.03333	4.9	100	711	0.711	636	0.636	28	22.3	651_1	651
185	3.08333	4.9	100	745	0.745	662	0.662	25	22.5	651_1	651
187	3.11667	4.9	100	731	0.731	644	0.644	26	22.1	651_1	651
189	3.15	4.9	99	698	0.698	602	0.602	25	20.9	651_1	651
191	3.18333	4.9	99	681	0.681	578	0.578	26	20.3	651_1	651
193	3.21667	4.9	99	680	0.68	578	0.578	26	20.3	651_1	651
196	3.26667	4.9	98	732	0.732	588	0.588	25	20.1	651_1	651
198	3.3	4.9	98	774	0.774	609	0.609	25	20.5	651_1	651
200	3.33333	4.9	98	791	0.791	595	0.595	27	20.4	651_1	651
202	3.36667	4.9	98	825	0.825	622	0.622	26	20.7	651_1	651
204	3.4	4.9	98	873	0.873	652	0.652	27	21.4	651_1	651
207	3.45	4.9	98	897	0.897	671	0.671	27	22.1	651_1	651
209	3.48333	4.9	98	899	0.899	678	0.678	26	22.2	651_1	651
211	3.51667	4.9	99	905	0.905	684	0.684	27	22.6	651_1	651
215	3.58333	4.9	99	889	0.889	692	0.692	24	22.2	651_1	651
216	3.6	4.9	99	864	0.864	674	0.674	23	21.5	651_1	651
219	3.65	4.9	100	896	0.896	704	0.704	22	21.9	651_1	651
221	3.68333	4.9	101	906	0.906	718	0.718	22	22.2	651_1	651
224	3.73333	4.9	100	928	0.928	743	0.743	21	22.6	651_1	651
226	3.76667	4.9	100	931	0.931	750	0.75	22	23	651_1	651
229	3.81667	4.9	100	925	0.925	746	0.746	22	22.9	651_1	651
231	3.85	4.9	101	920	0.92	738	0.738	24	23	651_1	651
233	3.88333	4.9	102	952	0.952	760	0.76	25	23.6	651_1	651
235	3.91667	4.9	100	944	0.944	754	0.754	27	24.1	651_1	651
237	3.95	4.9	98	954	0.954	763	0.763	28	24.6	651_1	651
240	4	4.9	99	934	0.934	750	0.75	27	24	651_1	651
242	4.03333	4.9	100	945	0.945	762	0.762	26	23.9	651_1	651
244	4.06667	4.9	101	915	0.915	740	0.74	27	23.6	651_1	651
246	4.1	4.9	99	942	0.942	757	0.757	27	23.9	651_1	651
248	4.13333	4.9	98	939	0.939	759	0.759	27	24	651_1	651
250	4.16667	4.9	99	947	0.947	774	0.774	27	24.4	651_1	651
254	4.23333	4.9	101	964	0.964	816	0.816	23	24.8	651_1	651
256	4.26667	4.9	100	958	0.958	813	0.813	24	24.9	651_1	651
258	4.3	4.9	100	944	0.944	804	0.804	25	25	651_1	651
259	4.31667	4.9	100	955	0.955	815	0.815	26	25.3	651_1	651
261	4.35	4.9	100	923	0.923	790	0.79	26	24.8	651_1	651
263	4.38333	4.9	101	873	0.873	723	0.723	31	24.2	651_1	651
266	4.43333	4.9	100	878	0.878	725	0.725	31	23.9	651_1	651
268	4.46667	4.9	99	862	0.862	713	0.713	30	23.7	651_1	651
270	4.5	4.9	99	899	0.899	744	0.744	30	24.1	651_1	651
273	4.55	4.9	99	899	0.899	746	0.746	28	23.9	651_1	651
275	4.58333	4.9	100	913	0.913	759	0.759	27	24	651_1	651
277	4.61667	4.9	99	939	0.939	786	0.786	27	24.6	651_1	651
279	4.65	4.9	99	942	0.942	793	0.793	27	24.8	651_1	651
281	4.68333	4.9	100	933	0.933	791	0.791	27	25	651_1	651
283	4.71667	4.9	101	943	0.943	802	0.802	28	25.4	651_1	651
285	4.75	4.9	101	930	0.93	793	0.793	29	25.2	651_1	651
287	4.78333	4.9	100	930	0.93	793	0.793	29	25.2	651_1	651
289	4.81667	4.9	100	921	0.921	786	0.786	29	25.1	651_1	651
292	4.86667	4.9	102	926	0.926	794	0.794	27	25	651_1	651
294	4.9	4.9	102	924	0.924	788	0.788	28	24.9	651_1	651
296	4.93333	4.9	102	927	0.927	789	0.789	29	24.9	651_1	651
298	4.96667	4.9	101	929	0.929	790	0.79	28	24.9	651_1	651
301	5.01667	4.9	102	944	0.944	800	0.8	28	25	651_1	651
303	5.05	4.9	103	965	0.965	820	0.82	27	25.2	651_1	651
305	5.08333	4.9	103	970	0.97	825	0.825	27	25.4	651_1	651
307	5.11667	4.9	102	974	0.974	826	0.826	28	25.8	651_1	651
310	5.16667	4.9	101	977	0.977	837	0.837	27	25.8	651_1	651
312	5.2	4.9	102	988	0.988	845	0.845	27	25.8	651_1	651
314	5.23333	4.9	103	988	0.988	845	0.845	27	25.8	651_1	651
317	5.28333	4.9	103	983	0.983	850	0.85	27	26.1	651_1	651
319	5.31667	4.9	101	968	0.968	842	0.842	28	26.3	651_1	651
321	5.35	4.9	99	960	0.96	841	0.841	27	26	651_1	651
323	5.38333	4.9	99	964	0.964	851	0.851	28	26.4	651_1	651
325	5.41667	4.9	100	986	0.986	874	0.874	27	26.9	651_1	651
327	5.45	4.9	99	967	0.967	862	0.862	28	26.7	651_1	651
329	5.48333	4.9	99	991	0.991	891	0.891	28	27.6	651_1	651
331	5.51667	4.9	98	967	0.967	870	0.87	29	27.4	651_1	651
333	5.55	4.9	99	972	0.972	879	0.879	29	27.6	651_1	651
335	5.58333	4.9	99	988	0.988	896	0.896	29	27.7	651_1	651
338	5.63333	4.9	99	971	0.971	883	0.883	29	27.5	651_1	651
340	5.66667	4.9	98	935	0.935	853	0.853	29	26.7	651_1	651
342	5.7	4.9	98	927	0.927	858	0.858	28	26.6	651_1	651
344	5.73333	4.9	99	917	0.917	846	0.846	29	26.5	651_1	651
346	5.76667	4.9	100	925	0.925	856	0.856	28	26.6	651_1	651
348	5.8	4.9	100	907	0.907	844	0.844	28	26.3	651_1	651
351	5.85	4.9	100	878	0.878	835	0.835	25	25.6	651_1	651
353	5.88333	4.9	100	874	0.874	832	0.832	25	25.5	651_1	651
355	5.91667	4.9	101	876	0.876	829	0.829	25	25.5	651_1	651
357	5.95	6.1	102	861	0.861	803	0.803	26	25.1	651_1	651
359	5.98333	6.1	102	861	0.861	805	0.805	27	25.4	651_1	651
360	6	6.1	103	863	0.863	799	0.799	27	25.4	651_1	651
362	6.03333	6.1	105	873	0.873	800	0.8	29	25.6	651_1	651
363	6.05	6.1	106	914	0.914	799	0.799	36	26.8	651_1	651
365	6.08333	6.1	108	991	0.991	866	0.866	35	28.2	651_1	651
367	6.11667	6.1	108	1027	1.027	896	0.896	35	29.1	651_1	651
369	6.15	6.1	109	1063	1.063	934	0.934	34	30	651_1	651
371	6.18333	6.1	110	1077	1.077	955	0.955	33	30.3	651_1	651
372	6.2	6.1	110	1078	1.078	955	0.955	33	30.3	651_1	651
374	6.23333	6.1	111	1089	1.089	973	0.973	34	30.9	651_1	651
376	6.26667	6.1	111	1082	1.082	981	0.981	33	31.1	651_1	651
378	6.3	6.1	111	1063	1.063	977	0.977	33	31.2	651_1	651
380	6.33333	6.1	111	1063	1.063	977	0.977	33	31.2	651_1	651
382	6.36667	6.1	111	1045	1.045	969	0.969	33	31.1	651_1	651
384	6.4	6.1	111	1038	1.038	966	0.966	32	30.7	651_1	651
386	6.43333	6.1	110	992	0.992	924	0.924	32	29.7	651_1	651
388	6.46667	6.1	110	985	0.985	916	0.916	30	28.7	651_1	651
391	6.51667	6.1	110	998	0.998	922	0.922	29	28.3	651_1	651
392	6.53333	6.1	109	997	0.997	921	0.921	29	28.3	651_1	651
394	6.56667	6.1	109	1022	1.022	937	0.937	29	28.5	651_1	651
396	6.6	6.1	108	1062	1.062	967	0.967	29	28.9	651_1	651
398	6.63333	6.1	108	1078	1.078	976	0.976	29	29.3	651_1	651
402	6.7	6.1	108	1078	1.078	998	0.998	26	29.3	651_1	651
404	6.73333	6.1	109	1078	1.078	998	0.998	26	29.3	651_1	651
405	6.75	6.1	109	1067	1.067	985	0.985	27	29.3	651_1	651
407	6.78333	6.1	109	1031	1.031	950	0.95	27	28.6	651_1	651
409	6.81667	6.1	109	1020	1.02	935	0.935	26	27.8	651_1	651
412	6.86667	6.1	111	1028	1.028	937	0.937	26	27.5	651_1	651
414	6.9	6.1	112	1028	1.028	937	0.937	26	27.5	651_1	651
416	6.93333	6.1	112	1024	1.024	897	0.897	30	27.5	651_1	651
418	6.96667	7	114	1075	1.075	944	0.944	29	28	651_1	651
419	6.98333	7	116	1105	1.105	971	0.971	28	28.7	651_1	651
421	7.01667	7	117	1145	1.145	1009	1.009	30	30.2	651_1	651
423	7.05	7	119	1200	1.2	1059	1.059	31	31.7	651_1	651
424	7.06667	7	121	1230	1.23	1096	1.096	32	33.4	651_1	651
426	7.1	7	122	1268	1.268	1125	1.125	35	35	651_1	651
428	7.13333	7	123	1297	1.297	1156	1.156	36	35.7	651_1	651
430	7.16667	7	124	1307	1.307	1174	1.174	35	36.2	651_1	651
432	7.2	7	125	1296	1.296	1168	1.168	35	35.9	651_1	651
433	7.21667	7	126	1294	1.294	1178	1.178	34	35.8	651_1	651
435	7.25	7	126	1298	1.298	1188	1.188	34	36.1	651_1	651
437	7.28333	7	127	1327	1.327	1220	1.22	34	36.8	651_1	651
438	7.3	7	128	1349	1.349	1245	1.245	35	37.7	651_1	651
440	7.33333	7	128	1339	1.339	1250	1.25	35	38.3	651_1	651
442	7.36667	7	128	1320	1.32	1233	1.233	35	37.6	651_1	651
444	7.4	7	129	1337	1.337	1259	1.259	35	38.4	651_1	651
445	7.41667	7	130	1384	1.384	1310	1.31	36	39.8	651_1	651
447	7.45	7	130	1399	1.399	1335	1.335	36	40.5	651_1	651
449	7.48333	7	130	1403	1.403	1353	1.353	36	40.7	651_1	651
451	7.51667	7	130	1348	1.348	1307	1.307	33	38.9	651_1	651
452	7.53333	7	130	1354	1.354	1320	1.32	33	38.8	651_1	651
454	7.56667	7	131	1384	1.384	1347	1.347	35	39.9	651_1	651
456	7.6	7	131	1401	1.401	1364	1.364	36	40.6	651_1	651
457	7.61667	7	132	1393	1.393	1352	1.352	37	40.1	651_1	651
459	7.65	7	133	1373	1.373	1329	1.329	36	39.5	651_1	651
461	7.68333	7	133	1373	1.373	1329	1.329	36	39.5	651_1	651
463	7.71667	7	134	1399	1.399	1351	1.351	37	40.3	651_1	651
464	7.73333	7	134	1406	1.406	1361	1.361	37	40.8	651_1	651
466	7.76667	7	134	1430	1.43	1382	1.382	37	41	651_1	651
468	7.8	7	134	1418	1.418	1374	1.374	36	40.9	651_1	651
470	7.83333	7	135	1437	1.437	1405	1.405	34	41	651_1	651
471	7.85	7	135	1471	1.471	1436	1.436	35	41.4	651_1	651
473	7.88333	7	135	1473	1.473	1428	1.428	37	41.7	651_1	651
474	7.9	7	135	1490	1.49	1445	1.445	36	42.2	651_1	651
476	7.93333	7	136	1522	1.522	1477	1.477	37	42.8	651_1	651
478	7.96667	8	137	1512	1.512	1479	1.479	37	43.2	651_1	651
479	7.98333	8	138	1540	1.54	1503	1.503	38	44	651_1	651
480	8	8	138	1576	1.576	1540	1.54	39	45.1	651_1	651
482	8.03333	8	139	1610	1.61	1591	1.591	39	46.1	651_1	651
484	8.06667	8	140	1567	1.567	1558	1.558	37	44.9	651_1	651
485	8.08333	8	141	1610	1.61	1607	1.607	37	45.6	651_1	651
487	8.11667	8	142	1590	1.59	1597	1.597	37	45.5	651_1	651
489	8.15	8	143	1621	1.621	1624	1.624	36	45.3	651_1	651
491	8.18333	8	144	1636	1.636	1632	1.632	35	44.7	651_1	651
493	8.21667	8	144	1575	1.575	1567	1.567	34	43.2	651_1	651
494	8.23333	8	145	1518	1.518	1509	1.509	34	41.8	651_1	651
496	8.26667	8	145	1528	1.528	1509	1.509	34	41.5	651_1	651
498	8.3	8	145	1528	1.528	1509	1.509	34	41.5	651_1	651
500	8.33333	8	145	1579	1.579	1554	1.554	34	42.4	651_1	651
502	8.36667	8	146	1635	1.635	1604	1.604	34	43.8	651_1	651
503	8.38333	8	146	1667	1.667	1647	1.647	34	45.3	651_1	651
505	8.41667	8	147	1772	1.772	1756	1.756	33	47.2	651_1	651
507	8.45	8	147	1828	1.828	1833	1.833	33	50	651_1	651
508	8.46667	8	148	1839	1.839	1865	1.865	34	52	651_1	651
510	8.5	8	148	1840	1.84	1865	1.865	34	52	651_1	651
512	8.53333	8	149	1823	1.823	1860	1.86	36	53.1	651_1	651
513	8.55	8	149	1820	1.82	1881	1.881	37	54.1	651_1	651
515	8.58333	8	149	1829	1.829	1894	1.894	38	55	651_1	651
516	8.6	8	150	1820	1.82	1893	1.893	39	55.5	651_1	651
517	8.61667	8	150	1787	1.787	1870	1.87	39	55	651_1	651
519	8.65	8	150	1804	1.804	1901	1.901	38	55.4	651_1	651
521	8.68333	8	150	1814	1.814	1909	1.909	37	55.5	651_1	651
522	8.7	8	150	1781	1.781	1882	1.882	38	55.3	651_1	651
524	8.73333	8	150	1766	1.766	1868	1.868	38	55.1	651_1	651
526	8.76667	8	150	1770	1.77	1864	1.864	38	54.1	651_1	651
527	8.78333	8	150	1752	1.752	1834	1.834	38	53.6	651_1	651
529	8.81667	8	150	1772	1.772	1863	1.863	37	54	651_1	651
530	8.83333	8	151	1775	1.775	1856	1.856	38	54.2	651_1	651
532	8.86667	8	151	1788	1.788	1873	1.873	38	54.7	651_1	651
534	8.9	8	152	1788	1.788	1873	1.873	38	54.7	651_1	651
535	8.91667	8	150	1758	1.758	1848	1.848	38	54.4	651_1	651
537	8.95	8	150	1731	1.731	1831	1.831	36	53.8	651_1	651
539	8.98333	9	150	1748	1.748	1846	1.846	37	54.4	651_1	651
540	9	9	152	1725	1.725	1830	1.83	36	53.1	651_1	651
542	9.03333	9	152	1727	1.727	1821	1.821	35	52.3	651_1	651
544	9.06667	9	153	1726	1.726	1821	1.821	35	52.3	651_1	651
545	9.08333	9	153	1752	1.752	1829	1.829	36	52.1	651_1	651
547	9.11667	9	153	1791	1.791	1853	1.853	36	52.6	651_1	651
549	9.15	9	154	1821	1.821	1862	1.862	36	53.2	651_1	651
550	9.16667	9	154	1834	1.834	1869	1.869	35	53.3	651_1	651
552	9.2	9	154	1834	1.834	1868	1.868	35	53.3	651_1	651
553	9.21667	9	154	1827	1.827	1853	1.853	37	53.2	651_1	651
555	9.25	9	154	1843	1.843	1860	1.86	38	53.3	651_1	651
556	9.26667	9	154	1882	1.882	1906	1.906	38	54.6	651_1	651
558	9.3	9	155	1890	1.89	1914	1.914	39	55.6	651_1	651
559	9.31667	9	155	1897	1.897	1934	1.934	40	56.4	651_1	651
561	9.35	9	155	1869	1.869	1925	1.925	40	56.2	651_1	651
562	9.36667	9	155	1872	1.872	1942	1.942	40	57.3	651_1	651
564	9.4	9	155	1876	1.876	1943	1.943	40	57.6	651_1	651
565	9.41667	9	156	1842	1.842	1916	1.916	41	56.9	651_1	651
567	9.45	9	156	1859	1.859	1937	1.937	40	56.3	651_1	651
568	9.46667	9	156	1858	1.858	1937	1.937	40	56.3	651_1	651
570	9.5	9	157	1867	1.867	1938	1.938	40	56.5	651_1	651
572	9.53333	9	157	1874	1.874	1940	1.94	39	56.2	651_1	651
573	9.55	9	157	1863	1.863	1928	1.928	39	55.5	651_1	651
575	9.58333	9	158	1866	1.866	1922	1.922	37	54.3	651_1	651
577	9.61667	9	158	1909	1.909	1964	1.964	36	55.2	651_1	651
579	9.65	9	158	1863	1.863	1913	1.913	36	54.6	651_1	651
581	9.68333	9	158	1836	1.836	1887	1.887	34	53.3	651_1	651
582	9.7	9	158	1794	1.794	1846	1.846	33	51.9	651_1	651
584	9.73333	9	158	1843	1.843	1886	1.886	32	52	651_1	651
586	9.76667	9	158	1891	1.891	1931	1.931	33	53.5	651_1	651
588	9.8	9	158	1922	1.922	1960	1.96	34	55.1	651_1	651
589	9.81667	9	158	1928	1.928	1964	1.964	34	55.2	651_1	651
591	9.85	9	158	1954	1.954	1995	1.995	34	55.9	651_1	651
593	9.88333	9	159	1999	1.999	2044	2.044	35	57.4	651_1	651
594	9.9	9	159	2017	2.017	2057	2.057	36	58.2	651_1	651
595	9.91667	9	160	1975	1.975	2030	2.03	37	58.5	651_1	651
597	9.95	9	160	1937	1.937	1991	1.991	38	57.9	651_1	651
599	9.98333	10.1	160	1904	1.904	1959	1.959	37	56.4	651_1	651
600	10	10.1	160	1904	1.904	1959	1.959	37	56.4	651_1	651
602	10.0333	10.1	160	1924	1.924	1963	1.963	39	57.3	651_1	651
603	10.05	10.1	160	1929	1.929	1954	1.954	41	57.8	651_1	651
604	10.0667	10.1	160	1955	1.955	1967	1.967	42	57.8	651_1	651
606	10.1	10.1	160	1967	1.967	1980	1.98	42	58.1	651_1	651
608	10.1333	10.1	160	1967	1.967	1987	1.987	42	58.5	651_1	651
609	10.15	10.1	160	2004	2.004	2036	2.036	41	59	651_1	651
611	10.1833	10.1	160	2001	2.001	2039	2.039	41	59.8	651_1	651
612	10.2	10.1	160	1986	1.986	2041	2.041	40	59.8	651_1	651
614	10.2333	10.1	161	2007	2.007	2070	2.07	40	60.5	651_1	651
615	10.25	10.1	161	1993	1.993	2079	2.079	39	60.9	651_1	651
617	10.2833	10.1	162	1984	1.984	2083	2.083	40	61.3	651_1	651
618	10.3	10.1	163	2041	2.041	2139	2.139	40	62.6	651_1	651
619	10.3167	10.1	163	2042	2.042	2146	2.146	41	64.4	651_1	651
621	10.35	10.1	164	2039	2.039	2159	2.159	42	65.1	651_1	651
622	10.3667	10.1	164	2030	2.03	2168	2.168	42	65.5	651_1	651
624	10.4	10.1	164	2026	2.026	2163	2.163	42	65.1	651_1	651
625	10.4167	10.1	164	2047	2.047	2181	2.181	43	65.6	651_1	651
626	10.4333	10.1	164	2101	2.101	2229	2.229	45	66.8	651_1	651
628	10.4667	10.1	164	2080	2.08	2220	2.22	44	66.6	651_1	651
629	10.4833	10.1	164	2096	2.096	2250	2.25	44	67.8	651_1	651
631	10.5167	10.1	164	2058	2.058	2225	2.225	43	66.8	651_1	651
632	10.5333	10.1	164	2058	2.058	2225	2.225	43	66.8	651_1	651
634	10.5667	10.1	164	2040	2.04	2207	2.207	42	66.1	651_1	651
635	10.5833	10.1	164	1992	1.992	2165	2.165	40	64.6	651_1	651
637	10.6167	10.1	164	1977	1.977	2134	2.134	39	62.5	651_1	651
638	10.6333	10.1	164	1987	1.987	2147	2.147	39	63.2	651_1	651
640	10.6667	10.1	164	1997	1.997	2148	2.148	40	63	651_1	651
641	10.6833	10.1	164	1991	1.991	2128	2.128	40	63	651_1	651
643	10.7167	10.1	164	1981	1.981	2116	2.116	39	62.4	651_1	651
644	10.7333	10.1	165	2000	2	2132	2.132	40	63.2	651_1	651
646	10.7667	10.1	165	2078	2.078	2197	2.197	41	64.8	651_1	651
647	10.7833	10.1	165	2054	2.054	2169	2.169	41	64.5	651_1	651
648	10.8	10.1	165	2053	2.053	2169	2.169	41	64.5	651_1	651
650	10.8333	10.1	165	2075	2.075	2185	2.185	41	64.6	651_1	651
651	10.85	10.1	166	2130	2.13	2243	2.243	42	65.6	651_1	651
652	10.8667	10.1	166	2225	2.225	2337	2.337	44	68.6	651_1	651
654	10.9	10.1	165	2218	2.218	2351	2.351	45	69.2	651_1	651
655	10.9167	10.1	165	2190	2.19	2346	2.346	45	69.7	651_1	651
657	10.95	10.1	165	2191	2.191	2347	2.347	45	69.7	651_1	651
658	10.9667	10.1	165	2130	2.13	2300	2.3	43	68.4	651_1	651
659	10.9833	10.1	157	2096	2.096	2273	2.273	43	68	651_1	651
661	11.0167	10.1	157	2084	2.084	2260	2.26	42	67.4	651_1	651
662	11.0333	11.1	157	2084	2.084	2259	2.259	42	67.4	651_1	651
663	11.05	11.1	157	2072	2.072	2243	2.243	43	67.3	651_1	651
665	11.0833	11.1	158	2091	2.091	2250	2.25	44	67.7	651_1	651
666	11.1	11.1	158	2095	2.095	2261	2.261	45	68.4	651_1	651
667	11.1167	11.1	167	2118	2.118	2296	2.296	44	69.6	651_1	651
669	11.15	11.1	167	2115	2.115	2304	2.304	44	69.7	651_1	651
670	11.1667	11.1	168	2104	2.104	2307	2.307	45	70.5	651_1	651
672	11.2	11.1	168	2068	2.068	2280	2.28	44	70	651_1	651
673	11.2167	11.1	169	2103	2.103	2314	2.314	44	70.9	651_1	651
674	11.2333	11.1	168	2100	2.1	2313	2.313	44	70.9	651_1	651
676	11.2667	11.1	169	2126	2.126	2337	2.337	44	71.3	651_1	651
677	11.2833	11.1	169	2106	2.106	2311	2.311	44	70.5	651_1	651
678	11.3	11.1	169	2127	2.127	2324	2.324	44	71.2	651_1	651
680	11.3333	11.1	169	2156	2.156	2349	2.349	44	71.9	651_1	651
681	11.35	11.1	169	2201	2.201	2395	2.395	46	72.9	651_1	651
682	11.3667	11.1	169	2222	2.222	2429	2.429	45	73.6	651_1	651
684	11.4	11.1	169	2251	2.251	2462	2.462	46	74.5	651_1	651
685	11.4167	11.1	169	2252	2.252	2475	2.475	45	75.1	651_1	651
686	11.4333	11.1	169	2252	2.252	2476	2.476	45	75.1	651_1	651
688	11.4667	11.1	169	2243	2.243	2482	2.482	45	75.3	651_1	651
689	11.4833	11.1	169	2219	2.219	2470	2.47	45	75.3	651_1	651
691	11.5167	11.1	169	2187	2.187	2440	2.44	44	74.4	651_1	651
692	11.5333	11.1	169	2161	2.161	2411	2.411	44	73.8	651_1	651
693	11.55	11.1	169	2148	2.148	2395	2.395	44	73.2	651_1	651
695	11.5833	11.1	169	2138	2.138	2386	2.386	43	72.1	651_1	651
696	11.6	11.1	169	2150	2.15	2394	2.394	43	72.5	651_1	651
697	11.6167	11.1	169	2174	2.174	2404	2.404	42	72.4	651_1	651
699	11.65	11.1	169	2174	2.174	2385	2.385	43	71.4	651_1	651
700	11.6667	11.1	170	2199	2.199	2403	2.403	43	71.1	651_1	651
702	11.7	11.1	170	2215	2.215	2404	2.404	43	70.5	651_1	651
703	11.7167	11.1	170	2210	2.21	2380	2.38	44	69.8	651_1	651
705	11.75	11.1	170	2194	2.194	2367	2.367	42	69.1	651_1	651
706	11.7667	11.1	170	2180	2.18	2352	2.352	41	68.9	651_1	651
709	11.8167	11.1	170	2142	2.142	2304	2.304	40	67.1	651_1	651
710	11.8333	11.1	170	2168	2.168	2313	2.313	41	67.5	651_1	651
711	11.85	11.1	170	2168	2.168	2312	2.312	41	67.5	651_1	651
713	11.8833	11.1	170	2168	2.168	2304	2.304	41	67.6	651_1	651
714	11.9	11.1	170	2200	2.2	2330	2.33	42	68.3	651_1	651
716	11.9333	11.1	170	2210	2.21	2326	2.326	42	67.8	651_1	651
718	11.9667	11.1	171	2106	2.106	2229	2.229	37	63.2	651_1	651
719	11.9833	11.1	171	2261	2.261	2366	2.366	42	68	651_1	651
721	12.0167	12	171	2327	2.327	2418	2.418	41	68.5	651_1	651
722	12.0333	12	171	2323	2.323	2408	2.408	42	69	651_1	651
723	12.05	12	171	2357	2.357	2456	2.456	42	70	651_1	651
724	12.0667	12	171	2339	2.339	2442	2.442	43	70	651_1	651
725	12.0833	12	171	2379	2.379	2487	2.487	47	72.8	651_1	651
726	12.1	12	172	2455	2.455	2544	2.544	47	74	651_1	651
728	12.1333	12	171	2432	2.432	2558	2.558	50	76	651_1	651
729	12.15	12	172	2410	2.41	2581	2.581	49	77.2	651_1	651
730	12.1667	12	172	2388	2.388	2596	2.596	48	78.1	651_1	651
732	12.2	12	173	2342	2.342	2568	2.568	48	78.3	651_1	651
733	12.2167	12	173	2330	2.33	2586	2.586	47	79.1	651_1	651
734	12.2333	12	174	2365	2.365	2624	2.624	47	79.8	651_1	651
736	12.2667	12	174	2336	2.336	2621	2.621	45	79.7	651_1	651
737	12.2833	12	174	2313	2.313	2611	2.611	45	79.3	651_1	651
738	12.3	12	174	2314	2.314	2611	2.611	45	79.3	651_1	651
740	12.3333	12	174	2316	2.316	2618	2.618	45	79.3	651_1	651
741	12.35	12	175	2334	2.334	2641	2.641	45	79.8	651_1	651
742	12.3667	12	175	2338	2.338	2652	2.652	45	80.4	651_1	651
744	12.4	12	176	2339	2.339	2653	2.653	45	80.4	651_1	651
745	12.4167	12	176	2339	2.339	2653	2.653	45	80.4	651_1	651
746	12.4333	12	176	2348	2.348	2673	2.673	45	81.2	651_1	651
748	12.4667	12	176	2323	2.323	2652	2.652	45	80.7	651_1	651
749	12.4833	12	176	2317	2.317	2652	2.652	45	80.9	651_1	651
750	12.5	12	176	2324	2.324	2670	2.67	45	81.1	651_1	651
752	12.5333	12	176	2309	2.309	2646	2.646	45	80.3	651_1	651
753	12.55	12	175	2318	2.318	2651	2.651	45	80.3	651_1	651
754	12.5667	12	176	2355	2.355	2697	2.697	45	81.5	651_1	651
756	12.6	12	176	2350	2.35	2698	2.698	45	81.7	651_1	651
757	12.6167	12	176	2366	2.366	2723	2.723	45	82.6	651_1	651
758	12.6333	12	176	2378	2.378	2743	2.743	45	83.2	651_1	651
765	12.75	12	176	2354	2.354	2714	2.714	45	82.4	651_1	651
767	12.7833	12	176	2305	2.305	2673	2.673	43	80.2	651_1	651
768	12.8	12	177	2293	2.293	2652	2.652	45	80	651_1	651
769	12.8167	12	177	2301	2.301	2664	2.664	44	79.8	651_1	651
770	12.8333	12	177	2300	2.3	2657	2.657	44	79	651_1	651
772	12.8667	12	177	2327	2.327	2680	2.68	44	78.9	651_1	651
773	12.8833	12	177	2318	2.318	2669	2.669	44	78.2	651_1	651
774	12.9	12	177	2400	2.4	2751	2.751	46	81.3	651_1	651
776	12.9333	12	177	2401	2.401	2751	2.751	46	81.3	651_1	651
777	12.95	12	177	2401	2.401	2751	2.751	46	81.3	651_1	651
778	12.9667	12	177	2393	2.393	2745	2.745	45	81.6	651_1	651
780	13	12	177	2384	2.384	2744	2.744	45	81.7	651_1	651
781	13.0167	13	177	2354	2.354	2718	2.718	45	81.4	651_1	651
782	13.0333	13	177	2338	2.338	2696	2.696	45	80.8	651_1	651
784	13.0667	13	177	2351	2.351	2716	2.716	45	81.5	651_1	651
785	13.0833	13	177	2372	2.372	2726	2.726	45	81.5	651_1	651
786	13.1	13	177	2350	2.35	2686	2.686	45	80.3	651_1	651
787	13.1167	13	177	2380	2.38	2710	2.71	45	80.1	651_1	651
789	13.15	13	177	2409	2.409	2735	2.735	45	81.1	651_1	651
790	13.1667	13	177	2445	2.445	2782	2.782	45	82.6	651_1	651
791	13.1833	13	177	2445	2.445	2782	2.782	45	82.6	651_1	651
793	13.2167	13	177	2438	2.438	2783	2.783	45	83.1	651_1	651
794	13.2333	13	178	2450	2.45	2808	2.808	46	84.1	651_1	651
795	13.25	13	178	2455	2.455	2829	2.829	46	85.1	651_1	651
797	13.2833	13	178	2384	2.384	2766	2.766	44	82.7	651_1	651
798	13.3	13	179	2358	2.358	2738	2.738	44	81.7	651_1	651
800	13.3333	13	179	2371	2.371	2748	2.748	44	82	651_1	651
801	13.35	13	179	2371	2.371	2747	2.747	44	82	651_1	651
802	13.3667	13	179	2340	2.34	2707	2.707	45	80.5	651_1	651
803	13.3833	13	179	2358	2.358	2731	2.731	45	80.5	651_1	651
805	13.4167	13	179	2357	2.357	2723	2.723	45	79.8	651_1	651
806	13.4333	13	180	2388	2.388	2756	2.756	44	79.6	651_1	651
808	13.4667	13	180	2435	2.435	2811	2.811	44	80.5	651_1	651
809	13.4833	13	180	2446	2.446	2818	2.818	44	80.4	651_1	651
810	13.5	13	180	2504	2.504	2892	2.892	47	83.9	651_1	651
811	13.5167	13	180	2542	2.542	2964	2.964	47	86.5	651_1	651
813	13.55	13	180	2516	2.516	2965	2.965	47	87.3	651_1	651
814	13.5667	13	180	2533	2.533	3017	3.017	46	88.9	651_1	651
815	13.5833	13	180	2534	2.534	3017	3.017	46	88.9	651_1	651
817	13.6167	13	180	2517	2.517	3023	3.023	47	89.8	651_1	651
818	13.6333	13	181	2500	2.5	3016	3.016	47	89.7	651_1	651
819	13.65	13	181	2495	2.495	3020	3.02	47	89.5	651_1	651
821	13.6833	13	181	2487	2.487	3007	3.007	47	89.1	651_1	651
822	13.7	13	181	2493	2.493	3015	3.015	47	89.3	651_1	651
823	13.7167	13	182	2491	2.491	3013	3.013	47	89.1	651_1	651
824	13.7333	13	182	2513	2.513	3042	3.042	47	89.5	651_1	651
826	13.7667	13	182	2489	2.489	3032	3.032	46	89.1	651_1	651
827	13.7833	13	182	2467	2.467	3013	3.013	46	88.4	651_1	651
828	13.8	13	182	2464	2.464	3017	3.017	46	88.9	651_1	651
830	13.8333	13	182	2443	2.443	2997	2.997	46	88.7	651_1	651
831	13.85	13	182	2428	2.428	2981	2.981	46	89.1	651_1	651
832	13.8667	13	181	2450	2.45	3010	3.01	46	89.5	651_1	651
834	13.9	13	181	2443	2.443	2997	2.997	46	88.1	651_1	651
835	13.9167	13	181	2464	2.464	3013	3.013	46	89	651_1	651
836	13.9333	13	182	2503	2.503	3048	3.048	47	89.8	651_1	651
837	13.95	13	182	2490	2.49	3040	3.04	46	89.5	651_1	651
839	13.9833	13	182	2489	2.489	3054	3.054	46	90.7	651_1	651
840	14	13	182	2485	2.485	3061	3.061	46	90.5	651_1	651
841	14.0167	14.1	182	2495	2.495	3076	3.076	46	91.2	651_1	651
843	14.05	14.1	182	2507	2.507	3090	3.09	47	91.6	651_1	651
844	14.0667	14.1	182	2479	2.479	3072	3.072	46	91.6	651_1	651
845	14.0833	14.1	182	2479	2.479	3072	3.072	46	91.6	651_1	651
846	14.1	14.1	182	2499	2.499	3089	3.089	47	91.7	651_1	651
848	14.1333	14.1	182	2506	2.506	3091	3.091	47	91.6	651_1	651
849	14.15	14.1	182	2515	2.515	3096	3.096	48	91.7	651_1	651
850	14.1667	14.1	183	2479	2.479	3057	3.057	48	90.6	651_1	651
851	14.1833	14.1	183	2480	2.48	3054	3.054	50	90.8	651_1	651
852	14.2	14.1	183	2528	2.528	3104	3.104	50	92	651_1	651
853	14.2167	14.1	183	2537	2.537	3104	3.104	52	92.2	651_1	651
854	14.2333	14.1	183	2542	2.542	3124	3.124	52	93.2	651_1	651
856	14.2667	14.1	183	2549	2.549	3147	3.147	52	93.9	651_1	651
857	14.2833	14.1	183	2564	2.564	3181	3.181	52	94.7	651_1	651
858	14.3	14.1	183	2574	2.574	3199	3.199	52	95.5	651_1	651
859	14.3167	14.1	183	2569	2.569	3221	3.221	50	96	651_1	651
861	14.35	14.1	183	2531	2.531	3221	3.221	48	96.6	651_1	651
862	14.3667	14.1	183	2523	2.523	3204	3.204	48	95.9	651_1	651
863	14.3833	14.1	183	2513	2.513	3211	3.211	48	96.1	651_1	651
864	14.4	14.1	183	2504	2.504	3220	3.22	48	96.8	651_1	651
866	14.4333	14.1	183	2489	2.489	3226	3.226	49	97.1	651_1	651
867	14.45	14.1	184	2476	2.476	3204	3.204	48	96.6	651_1	651
868	14.4667	14.1	185	2479	2.479	3220	3.22	48	96.7	651_1	651
869	14.4833	14.1	185	2496	2.496	3238	3.238	49	96.9	651_1	651
871	14.5167	14.1	185	2512	2.512	3265	3.265	49	97.2	651_1	651
872	14.5333	14.1	185	2492	2.492	3246	3.246	49	96.4	651_1	651
873	14.55	14.1	185	2504	2.504	3266	3.266	48	96.5	651_1	651
874	14.5667	14.1	185	2524	2.524	3293	3.293	50	97.3	651_1	651
875	14.5833	14.1	185	2544	2.544	3328	3.328	51	99	651_1	651
876	14.6	14.1	185	2556	2.556	3340	3.34	51	99.1	651_1	651
877	14.6167	14.1	185	2552	2.552	3342	3.342	50	98.7	651_1	651
879	14.65	14.1	185	2529	2.529	3305	3.305	52	98.1	651_1	651
880	14.6667	14.1	185	2548	2.548	3345	3.345	50	98.7	651_1	651
881	14.6833	14.1	185	2499	2.499	3321	3.321	49	97.8	651_1	651
882	14.7	14.1	185	2490	2.49	3312	3.312	49	97.1	651_1	651
884	14.7333	14.1	185	2475	2.475	3274	3.274	49	95.7	651_1	651
885	14.75	14.1	185	2476	2.476	3274	3.274	49	95.7	651_1	651
886	14.7667	14.1	185	2505	2.505	3310	3.31	51	97	651_1	651
887	14.7833	14.1	185	2496	2.496	3339	3.339	51	98.2	651_1	651
888	14.8	14.1	185	2485	2.485	3333	3.333	51	98.2	651_1	651
889	14.8167	14.1	186	2497	2.497	3294	3.294	51	97.4	651_1	651
891	14.85	14.1	186	2506	2.506	3315	3.315	51	98.2	651_1	651
892	14.8667	14.1	186	2493	2.493	3324	3.324	50	97.9	651_1	651
893	14.8833	14.1	186	2502	2.502	3346	3.346	50	98.9	651_1	651
894	14.9	14.1	186	2488	2.488	3323	3.323	50	97.8	651_1	651
895	14.9167	14.1	185	2530	2.53	3361	3.361	50	98.6	651_1	651
896	14.9333	14.1	186	2528	2.528	3361	3.361	50	98.5	651_1	651
897	14.95	14.1	185	2532	2.532	3365	3.365	51	98.7	651_1	651
899	14.9833	14.1	185	2518	2.518	3349	3.349	51	97.4	651_1	651
900	15	14.1	185	2548	2.548	3382	3.382	50	97.4	651_1	651
901	15.0167	14.1	185	2536	2.536	3355	3.355	49	95.8	651_1	651
902	15.0333	14.1	185	2531	2.531	3353	3.353	49	96.1	651_1	651
903	15.05	14.1	185	2490	2.49	3300	3.3	48	94.2	651_1	651
904	15.0667	14.1	185	2521	2.521	3316	3.316	52	95.5	651_1	651
905	15.0833	14.1	185	2595	2.595	3404	3.404	54	98	651_1	651
906	15.1	14.1	185	2640	2.64	3462	3.462	57	100.9	651_1	651
907	15.1167	14.1	185	2623	2.623	3454	3.454	56	100.6	651_1	651
908	15.1333	14.1	185	2614	2.614	3454	3.454	56	101	651_1	651
910	15.1667	4.9	185	2550	2.55	3363	3.363	54	97.4	651_1	651
911	15.1833	4.9	184	2550	2.55	3363	3.363	54	97.4	651_1	651
912	15.2	4.9	183	2478	2.478	3267	3.267	50	92.6	651_1	651
914	15.2333	4.9	183	2439	2.439	3180	3.18	46	87.5	651_1	651
915	15.25	4.9	182	2418	2.418	3118	3.118	43	82.8	651_1	651
917	15.2833	4.9	181	2384	2.384	3034	3.034	42	78.3	651_1	651
919	15.3167	4.9	180	2374	2.374	3003	3.003	39	75.2	651_1	651
920	15.3333	4.9	180	2307	2.307	2918	2.918	40	73.7	651_1	651
922	15.3667	4.9	179	2340	2.34	2937	2.937	38	72.3	651_1	651
924	15.4	4.9	178	2408	2.408	3015	3.015	37	72.8	651_1	651
925	15.4167	4.9	177	2350	2.35	2950	2.95	36	70.9	651_1	651
927	15.45	4.9	176	2339	2.339	2942	2.942	36	70.4	651_1	651
929	15.4833	4.9	175	2337	2.337	2958	2.958	35	70.5	651_1	651
931	15.5167	4.9	174	2289	2.289	2918	2.918	35	69.4	651_1	651
932	15.5333	4.9	173	2294	2.294	2946	2.946	35	70.7	651_1	651
934	15.5667	4.9	172	2257	2.257	2931	2.931	35	70.8	651_1	651
936	15.6	4.9	171	2221	2.221	2894	2.894	35	70.3	651_1	651
937	15.6167	4.9	170	2236	2.236	2921	2.921	36	71.3	651_1	651
939	15.65	4.9	169	2195	2.195	2903	2.903	36	71.1	651_1	651
941	15.6833	4.9	167	2176	2.176	2876	2.876	35	69.9	651_1	651
943	15.7167	4.9	165	2116	2.116	2821	2.821	35	68.4	651_1	651
945	15.75	4.9	163	2030	2.03	2751	2.751	33	66.4	651_1	651
947	15.7833	4.9	162	1957	1.957	2680	2.68	32	64.8	651_1	651
949	15.8167	4.9	161	1895	1.895	2631	2.631	32	63.7	651_1	651
950	15.8333	4.9	161	1830	1.83	2562	2.562	32	62.4	651_1	651
952	15.8667	4.9	160	1811	1.811	2521	2.521	32	62	651_1	651
954	15.9	4.9	159	1820	1.82	2548	2.548	33	62.4	651_1	651
956	15.9333	4.9	158	1816	1.816	2560	2.56	32	62.9	651_1	651
957	15.95	4.9	157	1771	1.771	2512	2.512	34	62.9	651_1	651
959	15.9833	4.9	155	1720	1.72	2453	2.453	33	61.5	651_1	651
961	16.0167	4.9	153	1692	1.692	2418	2.418	33	61.4	651_1	651
963	16.05	4.9	152	1682	1.682	2415	2.415	34	62.1	651_1	651
964	16.0667	4.9	151	1690	1.69	2434	2.434	36	63.6	651_1	651
966	16.1	4.9	150	1616	1.616	2345	2.345	35	62.2	651_1	651
968	16.1333	4.9	150	1554	1.554	2266	2.266	34	60.1	651_1	651
970	16.1667	4.9	149	1489	1.489	2176	2.176	34	58	651_1	651
972	16.2	4.9	148	1464	1.464	2134	2.134	33	56.7	651_1	651
974	16.2333	4.9	146	1432	1.432	2083	2.083	32	55.3	651_1	651
976	16.2667	4.9	146	1396	1.396	2016	2.016	31	53.4	651_1	651
978	16.3	4.9	145	1396	1.396	2015	2.015	31	53.4	651_1	651
979	16.3167	4.9	145	1401	1.401	2014	2.014	32	53.5	651_1	651
981	16.35	4.9	145	1388	1.388	1995	1.995	32	53.3	651_1	651
983	16.3833	4.9	144	1388	1.388	1989	1.989	32	52.9	651_1	651
985	16.4167	4.9	144	1380	1.38	1981	1.981	33	53.7	651_1	651
987	16.45	4.9	144	1353	1.353	1945	1.945	33	53.5	651_1	651
989	16.4833	4.9	143	1317	1.317	1899	1.899	32	52.3	651_1	651
991	16.5167	4.9	141	1275	1.275	1842	1.842	31	50.7	651_1	651
994	16.5667	4.9	140	1235	1.235	1782	1.782	30	48.6	651_1	651
996	16.6	4.9	139	1239	1.239	1758	1.758	30	47.3	651_1	651
998	16.6333	4.9	138	1264	1.264	1774	1.774	30	48	651_1	651
1000	16.6667	4.9	138	1234	1.234	1729	1.729	28	46.6	651_1	651
1002	16.7	4.9	138	1222	1.222	1715	1.715	28	46.2	651_1	651
1004	16.7333	4.9	138	1237	1.237	1730	1.73	29	46.7	651_1	651
1005	16.75	4.9	138	1276	1.276	1778	1.778	30	48.5	651_1	651
1007	16.7833	4.9	137	1290	1.29	1791	1.791	31	49.4	651_1	651
1009	16.8167	4.9	136	1261	1.261	1767	1.767	30	49.1	651_1	651
1011	16.85	4.9	134	1228	1.228	1716	1.716	31	47.7	651_1	651
1013	16.8833	4.9	132	1216	1.216	1686	1.686	31	47.1	651_1	651
1016	16.9333	4.9	130	1173	1.173	1624	1.624	30	45.6	651_1	651
1018	16.9667	4.9	129	1161	1.161	1589	1.589	29	44.5	651_1	651
1019	16.9833	4.9	129	1160	1.16	1589	1.589	29	44.5	651_1	651
1021	17.0167	4.9	129	1186	1.186	1613	1.613	30	45.7	651_1	651
1023	17.05	4.9	129	1224	1.224	1664	1.664	31	48	651_1	651
1024	17.0667	4.9	129	1248	1.248	1707	1.707	32	50.4	651_1	651
1026	17.1	4.9	128	1286	1.286	1778	1.778	34	53.9	651_1	651
1027	17.1167	4.9	129	1283	1.283	1807	1.807	37	56.5	651_1	651
1029	17.15	4.9	129	1284	1.284	1808	1.808	37	56.5	651_1	651
1031	17.1833	4.9	129	1210	1.21	1736	1.736	36	54.4	651_1	651
1034	17.2333	4.9	128	1137	1.137	1634	1.634	34	50.6	651_1	651
1036	17.2667	4.9	126	1138	1.138	1612	1.612	33	48.7	651_1	651
1038	17.3	4.9	126	1138	1.138	1587	1.587	31	46.6	651_1	651
1040	17.3333	4.9	125	1112	1.112	1528	1.528	29	44.3	651_1	651
1042	17.3667	4.9	124	1111	1.111	1528	1.528	29	44.3	651_1	651
1044	17.4	4.9	124	1136	1.136	1537	1.537	30	44.6	651_1	651
1045	17.4167	4.9	124	1193	1.193	1598	1.598	30	46.1	651_1	651
1047	17.45	4.9	124	1232	1.232	1653	1.653	32	48.4	651_1	651
1048	17.4667	4.9	124	1209	1.209	1639	1.639	33	49.3	651_1	651
1050	17.5	4.9	125	1173	1.173	1602	1.602	35	49.8	651_1	651
1052	17.5333	4.9	126	1194	1.194	1628	1.628	35	50.6	651_1	651
1054	17.5667	4.9	126	1157	1.157	1584	1.584	36	50.2	651_1	651
1055	17.5833	4.9	127	1137	1.137	1560	1.56	37	49.9	651_1	651
1057	17.6167	4.9	128	1116	1.116	1529	1.529	37	49	651_1	651
1058	17.6333	4.9	127	1099	1.099	1493	1.493	37	48.2	651_1	651
1060	17.6667	4.9	128	1101	1.101	1483	1.483	38	47.9	651_1	651
1061	17.6833	4.9	128	1101	1.101	1483	1.483	38	47.9	651_1	651
1063	17.7167	4.9	129	1104	1.104	1478	1.478	38	47.6	651_1	651
1065	17.75	4.9	129	1112	1.112	1478	1.478	38	47.6	651_1	651
1066	17.7667	4.9	128	1124	1.124	1494	1.494	38	47.9	651_1	651
1068	17.8	4.9	125	1094	1.094	1450	1.45	37	46.5	651_1	651
1070	17.8333	4.9	123	1079	1.079	1429	1.429	37	45.9	651_1	651
1072	17.8667	4.9	121	1072	1.072	1415	1.415	36	45.2	651_1	651
1074	17.9	4.9	119	1075	1.075	1427	1.427	32	44.5	651_1	651
1076	17.9333	4.9	117	1048	1.048	1394	1.394	30	43.1	651_1	651
1079	17.9833	4.9	116	1028	1.028	1367	1.367	30	42	651_1	651
1080	18	4.9	116	999	0.999	1334	1.334	29	40.6	651_1	651
1082	18.0333	4.9	117	1011	1.011	1323	1.323	29	40	651_1	651
1084	18.0667	4.9	117	1027	1.027	1338	1.338	30	40.8	651_1	651
1085	18.0833	4.9	118	1014	1.014	1306	1.306	31	40.6	651_1	651
1086	18.1	4.9	119	986	0.986	1245	1.245	38	40.5	651_1	651
1087	18.1167	4.9	119	1023	1.023	1259	1.259	40	41	651_1	651
1089	18.15	4.9	120	1093	1.093	1319	1.319	43	44	651_1	651
1090	18.1667	4.9	121	1154	1.154	1406	1.406	39	46	651_1	651
1092	18.2	4.9	122	1149	1.149	1436	1.436	36	47.5	651_1	651
1094	18.2333	4.9	123	1144	1.144	1463	1.463	36	48.7	651_1	651
1096	18.2667	4.9	125	1162	1.162	1504	1.504	36	49.5	651_1	651
1097	18.2833	4.9	125	1193	1.193	1537	1.537	38	51.1	651_1	651
1099	18.3167	4.9	125	1152	1.152	1502	1.502	36	49.6	651_1	651
