# Supplementary material for: On the development of diagnostic support algorithms based on CPET biosignals data via machine learning and wavelets
Source: PeerJ journal article supplement (doi:10.7717/peerj-cs.2474), 2025-01-30
Supplement: raw_data.zip [file Subject_34.xlsx]

## Sheet: Folha1
time	time	Speed	HR	VO2	VO2	VCO2	VCO2	RR	VE	ID_test	ID
	min	km/h	/min	ml/min	L/min	ml/min	L/min	/min	L/min
0	0	4.9	110	893	0.893	853	0.853	28	26.9	653_1	653
6	0.1	4.9	112	1000	1	1185	1.185	10	36.8	653_1	653
11	0.183333	4.9	105	895	0.895	853	0.853	28	26.9	653_1	653
13	0.216667	4.9	106	763	0.763	720	0.72	29	23.8	653_1	653
16	0.266667	4.9	104	789	0.789	742	0.742	24	22.9	653_1	653
21	0.35	4.9	104	858	0.858	828	0.828	19	24.8	653_1	653
24	0.4	4.9	105	879	0.879	848	0.848	20	25.6	653_1	653
29	0.483333	4.9	106	911	0.911	955	0.955	16	29.1	653_1	653
32	0.533333	4.9	106	937	0.937	927	0.927	18	27.6	653_1	653
35	0.583333	4.9	104	995	0.995	997	0.997	17	29.4	653_1	653
40	0.666667	4.9	102	1066	1.066	1079	1.079	16	31.5	653_1	653
43	0.716667	4.9	103	1139	1.139	1138	1.138	18	33.3	653_1	653
47	0.783333	4.9	101	1193	1.193	1214	1.214	16	35.1	653_1	653
49	0.816667	4.9	102	1231	1.231	1242	1.242	17	36.1	653_1	653
51	0.85	4.9	102	1190	1.19	1188	1.188	18	34.8	653_1	653
54	0.9	4.9	102	1240	1.24	1214	1.214	19	35.1	653_1	653
59	0.983333	4.9	104	1286	1.286	1256	1.256	17	35.6	653_1	653
61	1.01667	4.9	106	1285	1.285	1244	1.244	20	36.1	653_1	653
65	1.08333	4.9	106	1327	1.327	1314	1.314	19	38.1	653_1	653
69	1.15	4.9	108	1351	1.351	1303	1.303	20	37.1	653_1	653
72	1.2	4.9	107	1333	1.333	1308	1.308	19	37.1	653_1	653
75	1.25	4.9	106	1375	1.375	1372	1.372	18	38.6	653_1	653
77	1.28333	4.9	108	1340	1.34	1338	1.338	19	38.1	653_1	653
80	1.33333	4.9	108	1339	1.339	1319	1.319	22	38.1	653_1	653
83	1.38333	4.9	108	1422	1.422	1401	1.401	22	40.4	653_1	653
87	1.45	4.9	109	1330	1.33	1326	1.326	23	38.9	653_1	653
91	1.51667	4.9	109	1331	1.331	1326	1.326	23	38.9	653_1	653
95	1.58333	4.9	110	1451	1.451	1426	1.426	21	40.3	653_1	653
98	1.63333	4.9	111	1430	1.43	1393	1.393	21	39.7	653_1	653
100	1.66667	4.9	111	1428	1.428	1404	1.404	22	40.1	653_1	653
104	1.73333	4.9	113	1384	1.384	1376	1.376	19	38.5	653_1	653
108	1.8	4.9	114	1377	1.377	1383	1.383	19	38.3	653_1	653
111	1.85	4.9	115	1496	1.496	1516	1.516	21	42.8	653_1	653
113	1.88333	4.9	116	1371	1.371	1411	1.411	23	41.7	653_1	653
116	1.93333	4.9	116	1348	1.348	1407	1.407	23	41.7	653_1	653
119	1.98333	4.9	116	1405	1.405	1497	1.497	23	44.2	653_1	653
121	2.01667	4.9	116	1412	1.412	1517	1.517	22	44.7	653_1	653
127	2.11667	4.9	116	1399	1.399	1572	1.572	18	45.8	653_1	653
130	2.16667	4.9	116	1362	1.362	1562	1.562	18	45.7	653_1	653
133	2.21667	4.9	116	1361	1.361	1550	1.55	18	45	653_1	653
136	2.26667	4.9	115	1393	1.393	1597	1.597	17	46	653_1	653
141	2.35	4.9	113	1348	1.348	1550	1.55	17	44.9	653_1	653
145	2.41667	4.9	112	1348	1.348	1550	1.55	17	44.9	653_1	653
147	2.45	4.9	113	1383	1.383	1577	1.577	17	45.5	653_1	653
150	2.5	4.9	113	1411	1.411	1551	1.551	20	44.7	653_1	653
153	2.55	4.9	110	1399	1.399	1545	1.545	20	44.9	653_1	653
157	2.61667	4.9	109	1280	1.28	1399	1.399	18	39.4	653_1	653
159	2.65	4.9	109	1318	1.318	1409	1.409	18	39.1	653_1	653
162	2.7	4.9	111	1467	1.467	1593	1.593	20	45.7	653_1	653
165	2.75	4.9	111	1403	1.403	1547	1.547	21	45.7	653_1	653
167	2.78333	4.9	110	1349	1.349	1511	1.511	21	44.7	653_1	653
171	2.85	4.9	110	1338	1.338	1519	1.519	20	44.5	653_1	653
174	2.9	4.9	112	1336	1.336	1536	1.536	20	44.5	653_1	653
177	2.95	4.9	112	1349	1.349	1544	1.544	20	44.9	653_1	653
181	3.01667	4.9	113	1272	1.272	1466	1.466	20	42.6	653_1	653
184	3.06667	4.9	113	1272	1.272	1466	1.466	20	42.6	653_1	653
191	3.18333	4.9	113	1286	1.286	1476	1.476	16	40.6	653_1	653
195	3.25	4.9	115	1295	1.295	1475	1.475	15	39.9	653_1	653
198	3.3	4.9	114	1306	1.306	1470	1.47	15	39.9	653_1	653
201	3.35	4.9	112	1325	1.325	1478	1.478	15	40.1	653_1	653
205	3.41667	4.9	113	1272	1.272	1397	1.397	14	37.1	653_1	653
209	3.48333	4.9	113	1376	1.376	1509	1.509	15	40.3	653_1	653
212	3.53333	4.9	112	1348	1.348	1493	1.493	15	40.3	653_1	653
215	3.58333	4.9	111	1341	1.341	1468	1.468	18	41.2	653_1	653
218	3.63333	4.9	110	1363	1.363	1487	1.487	19	42.3	653_1	653
220	3.66667	4.9	109	1314	1.314	1434	1.434	20	41	653_1	653
223	3.71667	4.9	108	1286	1.286	1387	1.387	21	40	653_1	653
226	3.76667	4.9	107	1318	1.318	1425	1.425	20	40.5	653_1	653
229	3.81667	4.9	106	1285	1.285	1385	1.385	20	39.3	653_1	653
235	3.91667	4.9	105	1285	1.285	1384	1.384	20	39.3	653_1	653
237	3.95	4.9	105	1251	1.251	1341	1.341	21	38.2	653_1	653
239	3.98333	4.9	106	1217	1.217	1289	1.289	22	37.1	653_1	653
241	4.01667	4.9	104	1268	1.268	1402	1.402	18	39.6	653_1	653
245	4.08333	4.9	106	1201	1.201	1312	1.312	17	36.5	653_1	653
248	4.13333	4.9	106	1219	1.219	1313	1.313	17	36.7	653_1	653
250	4.16667	4.9	106	1219	1.219	1302	1.302	18	36.6	653_1	653
253	4.21667	4.9	107	1240	1.24	1247	1.247	21	35.3	653_1	653
256	4.26667	4.9	107	1333	1.333	1355	1.355	22	39.1	653_1	653
260	4.33333	4.9	107	1365	1.365	1408	1.408	21	40.2	653_1	653
264	4.4	4.9	108	1214	1.214	1266	1.266	18	36.2	653_1	653
268	4.46667	4.9	107	1365	1.365	1408	1.408	21	40.2	653_1	653
272	4.53333	4.9	108	1403	1.403	1442	1.442	19	40.4	653_1	653
275	4.58333	4.9	110	1389	1.389	1440	1.44	19	40.3	653_1	653
279	4.65	4.9	109	1371	1.371	1443	1.443	18	40.1	653_1	653
281	4.68333	4.9	108	1389	1.389	1463	1.463	19	40.5	653_1	653
285	4.75	4.9	108	1332	1.332	1385	1.385	18	37.5	653_1	653
288	4.8	4.9	107	1409	1.409	1466	1.466	20	40.5	653_1	653
291	4.85	4.9	108	1366	1.366	1446	1.446	21	40.5	653_1	653
295	4.91667	4.9	106	1360	1.36	1469	1.469	18	40.8	653_1	653
298	4.96667	4.9	105	1339	1.339	1456	1.456	18	40.5	653_1	653
301	5.01667	4.9	104	1320	1.32	1427	1.427	19	40.1	653_1	653
305	5.08333	4.9	103	1296	1.296	1395	1.395	19	39.2	653_1	653
308	5.13333	4.9	106	1313	1.313	1406	1.406	19	39.5	653_1	653
311	5.18333	4.9	108	1280	1.28	1376	1.376	19	38.8	653_1	653
314	5.23333	4.9	109	1270	1.27	1368	1.368	19	38.5	653_1	653
318	5.3	4.9	111	1270	1.27	1345	1.345	20	37.8	653_1	653
322	5.36667	4.9	113	1269	1.269	1345	1.345	20	37.8	653_1	653
326	5.43333	4.9	115	1277	1.277	1374	1.374	18	38.5	653_1	653
328	5.46667	4.9	116	1211	1.211	1270	1.27	18	35.3	653_1	653
330	5.5	4.9	116	1271	1.271	1308	1.308	18	36.1	653_1	653
334	5.56667	4.9	115	1330	1.33	1377	1.377	17	38.1	653_1	653
337	5.61667	4.9	114	1327	1.327	1370	1.37	17	38.1	653_1	653
341	5.68333	4.9	113	1354	1.354	1409	1.409	17	38.9	653_1	653
344	5.73333	4.9	114	1427	1.427	1498	1.498	18	42.1	653_1	653
347	5.78333	4.9	115	1399	1.399	1470	1.47	19	41	653_1	653
352	5.86667	4.9	113	1412	1.412	1541	1.541	17	43.1	653_1	653
356	5.93333	4.9	113	1378	1.378	1525	1.525	17	42.9	653_1	653
359	5.98333	4.9	113	1378	1.378	1525	1.525	17	42.9	653_1	653
363	6.05	4.9	115	1403	1.403	1555	1.555	16	43.2	653_1	653
366	6.1	4.9	117	1387	1.387	1533	1.533	17	43.1	653_1	653
369	6.15	4.9	116	1406	1.406	1557	1.557	17	43.4	653_1	653
371	6.18333	4.9	116	1383	1.383	1536	1.536	17	43.2	653_1	653
375	6.25	4.9	119	1344	1.344	1428	1.428	19	38.8	653_1	653
380	6.33333	4.9	120	1401	1.401	1535	1.535	18	42.6	653_1	653
382	6.36667	4.9	120	1362	1.362	1472	1.472	20	41.4	653_1	653
387	6.45	4.9	119	1309	1.309	1395	1.395	20	38.5	653_1	653
390	6.5	4.9	117	1336	1.336	1401	1.401	21	38.4	653_1	653
394	6.56667	4.9	118	1358	1.358	1454	1.454	18	39.7	653_1	653
397	6.61667	4.9	118	1407	1.407	1525	1.525	17	41.3	653_1	653
401	6.68333	4.9	118	1436	1.436	1593	1.593	18	44.4	653_1	653
406	6.76667	4.9	117	1394	1.394	1583	1.583	17	44.3	653_1	653
410	6.83333	4.9	119	1368	1.368	1581	1.581	16	43.5	653_1	653
414	6.9	4.9	121	1368	1.368	1581	1.581	16	43.5	653_1	653
417	6.95	4.9	121	1380	1.38	1600	1.6	15	43.9	653_1	653
429	7.15	4.9	122	1326	1.326	1537	1.537	16	42.6	653_1	653
432	7.2	4.9	122	1279	1.279	1502	1.502	16	42.3	653_1	653
437	7.28333	4.9	122	1215	1.215	1405	1.405	15	38.8	653_1	653
440	7.33333	4.9	122	1244	1.244	1374	1.374	17	37.8	653_1	653
444	7.4	4.9	122	1268	1.268	1372	1.372	18	38.3	653_1	653
447	7.45	4.9	122	1337	1.337	1461	1.461	20	41.6	653_1	653
450	7.5	4.9	122	1283	1.283	1428	1.428	20	41.1	653_1	653
454	7.56667	4.9	122	1319	1.319	1488	1.488	19	42.1	653_1	653
456	7.6	4.9	122	1321	1.321	1496	1.496	19	42.1	653_1	653
460	7.66667	4.9	120	1324	1.324	1507	1.507	18	42.5	653_1	653
464	7.73333	4.9	119	1304	1.304	1467	1.467	19	41.6	653_1	653
468	7.8	4.9	119	1315	1.315	1495	1.495	19	42.1	653_1	653
472	7.86667	4.9	119	1335	1.335	1532	1.532	18	43	653_1	653
475	7.91667	4.9	120	1312	1.312	1514	1.514	18	42.8	653_1	653
479	7.98333	4.9	119	1271	1.271	1462	1.462	18	41.5	653_1	653
482	8.03333	4.9	120	1254	1.254	1437	1.437	18	41	653_1	653
488	8.13333	4.9	121	1188	1.188	1373	1.373	15	38.7	653_1	653
492	8.2	4.9	121	1266	1.266	1410	1.41	18	40.1	653_1	653
495	8.25	4.9	121	1255	1.255	1356	1.356	19	38.8	653_1	653
499	8.31667	4.9	121	1254	1.254	1356	1.356	19	38.8	653_1	653
501	8.35	4.9	121	1272	1.272	1355	1.355	19	38.7	653_1	653
505	8.41667	4.9	120	1305	1.305	1372	1.372	20	39.2	653_1	653
508	8.46667	4.9	120	1312	1.312	1380	1.38	19	39.3	653_1	653
511	8.51667	4.9	119	1332	1.332	1406	1.406	19	39.9	653_1	653
514	8.56667	4.9	120	1336	1.336	1444	1.444	19	41	653_1	653
518	8.63333	4.9	121	1314	1.314	1433	1.433	19	40.9	653_1	653
520	8.66667	4.9	121	1265	1.265	1382	1.382	19	40	653_1	653
525	8.75	4.9	120	1238	1.238	1360	1.36	19	39.5	653_1	653
529	8.81667	4.9	120	1248	1.248	1375	1.375	20	40	653_1	653
532	8.86667	4.9	120	1271	1.271	1405	1.405	19	40.6	653_1	653
536	8.93333	4.9	121	1279	1.279	1423	1.423	19	40.8	653_1	653
538	8.96667	4.9	120	1250	1.25	1390	1.39	19	40.3	653_1	653
541	9.01667	4.9	119	1271	1.271	1404	1.404	20	40.9	653_1	653
545	9.08333	4.9	119	1220	1.22	1343	1.343	18	38.6	653_1	653
548	9.13333	4.9	118	1332	1.332	1449	1.449	19	41.4	653_1	653
553	9.21667	4.9	119	1332	1.332	1450	1.45	19	41.4	653_1	653
556	9.26667	4.9	119	1281	1.281	1386	1.386	21	40.3	653_1	653
559	9.31667	4.9	119	1266	1.266	1356	1.356	21	39.6	653_1	653
564	9.4	4.9	119	1262	1.262	1350	1.35	18	37.4	653_1	653
571	9.51667	4.9	120	1263	1.263	1374	1.374	14	36.8	653_1	653
574	9.56667	4.9	121	1280	1.28	1391	1.391	14	37.1	653_1	653
577	9.61667	4.9	123	1281	1.281	1410	1.41	14	37.7	653_1	653
583	9.71667	4.9	123	1247	1.247	1379	1.379	12	36.4	653_1	653
586	9.76667	4.9	125	1247	1.247	1364	1.364	14	37.2	653_1	653
591	9.85	4.9	126	1267	1.267	1391	1.391	14	37.9	653_1	653
593	9.88333	4.9	127	1293	1.293	1418	1.418	15	38.8	653_1	653
596	9.93333	5.4	128	1290	1.29	1390	1.39	18	39.5	653_1	653
599	9.98333	5.4	129	1339	1.339	1418	1.418	21	41	653_1	653
601	10.0167	5.4	131	1314	1.314	1371	1.371	24	40.6	653_1	653
606	10.1	5.4	132	1314	1.314	1371	1.371	24	40.6	653_1	653
609	10.15	5.4	134	1387	1.387	1503	1.503	19	42.9	653_1	653
612	10.2	5.4	134	1358	1.358	1455	1.455	22	42.6	653_1	653
615	10.25	5.4	135	1405	1.405	1516	1.516	21	43.5	653_1	653
618	10.3	5.4	135	1414	1.414	1548	1.548	21	44.3	653_1	653
620	10.3333	5.4	136	1426	1.426	1585	1.585	22	46	653_1	653
625	10.4167	5.4	136	1396	1.396	1556	1.556	18	43.3	653_1	653
629	10.4833	6.1	137	1481	1.481	1683	1.683	20	48.6	653_1	653
632	10.5333	6.1	138	1492	1.492	1712	1.712	20	49.5	653_1	653
635	10.5833	6.1	139	1513	1.513	1753	1.753	20	50.6	653_1	653
637	10.6167	6.1	140	1489	1.489	1699	1.699	21	48.8	653_1	653
642	10.7	6.1	141	1475	1.475	1662	1.662	18	46.6	653_1	653
645	10.75	6.1	142	1553	1.553	1714	1.714	18	47.6	653_1	653
649	10.8167	6.1	142	1659	1.659	1842	1.842	20	52.1	653_1	653
652	10.8667	6.1	143	1664	1.664	1842	1.842	20	52	653_1	653
654	10.9	6.1	143	1682	1.682	1835	1.835	21	52.1	653_1	653
657	10.95	6.4	144	1724	1.724	1855	1.855	21	52.1	653_1	653
659	10.9833	6.4	144	1755	1.755	1871	1.871	22	52.3	653_1	653
663	11.05	6.4	145	1784	1.784	1939	1.939	20	54.3	653_1	653
665	11.0833	6.4	146	1778	1.778	1940	1.94	21	54.7	653_1	653
668	11.1333	6.4	148	1796	1.796	1947	1.947	21	54.2	653_1	653
670	11.1667	6.4	149	1821	1.821	1976	1.976	22	54.6	653_1	653
674	11.2333	6.4	150	1851	1.851	2046	2.046	21	56	653_1	653
677	11.2833	6.4	151	1881	1.881	2107	2.107	20	57.7	653_1	653
680	11.3333	6.4	152	1895	1.895	2142	2.142	20	58.3	653_1	653
684	11.4	6.4	152	1881	1.881	2115	2.115	21	57.9	653_1	653
687	11.45	7	153	1915	1.915	2162	2.162	21	59.4	653_1	653
689	11.4833	7	154	1932	1.932	2173	2.173	21	59.5	653_1	653
692	11.5333	7	155	1982	1.982	2231	2.231	21	60.7	653_1	653
694	11.5667	7	156	2032	2.032	2265	2.265	22	61.5	653_1	653
697	11.6167	7	157	2092	2.092	2325	2.325	22	62.7	653_1	653
700	11.6667	7	158	2187	2.187	2393	2.393	22	63.8	653_1	653
702	11.7	7	159	2201	2.201	2439	2.439	22	64.9	653_1	653
705	11.75	7	159	2162	2.162	2440	2.44	23	65.8	653_1	653
708	11.8	7	160	2173	2.173	2460	2.46	23	66.2	653_1	653
710	11.8333	7	160	2187	2.187	2481	2.481	22	66.9	653_1	653
714	11.9	7	160	2187	2.187	2481	2.481	22	66.9	653_1	653
716	11.9333	7	160	2199	2.199	2501	2.501	23	67.7	653_1	653
718	11.9667	7.7	160	2228	2.228	2529	2.529	23	68.1	653_1	653
720	12	7.7	161	2237	2.237	2520	2.52	24	67.9	653_1	653
722	12.0333	7.7	161	2269	2.269	2523	2.523	25	67.4	653_1	653
725	12.0833	7.7	161	2318	2.318	2553	2.553	26	68.1	653_1	653
727	12.1167	7.7	161	2349	2.349	2537	2.537	28	67.6	653_1	653
729	12.15	7.7	162	2383	2.383	2585	2.585	27	69.1	653_1	653
732	12.2	7.7	163	2379	2.379	2596	2.596	26	69.6	653_1	653
735	12.25	7.7	163	2362	2.362	2589	2.589	26	69.1	653_1	653
737	12.2833	7.7	164	2402	2.402	2639	2.639	24	69.4	653_1	653
740	12.3333	7.7	164	2429	2.429	2679	2.679	23	69.7	653_1	653
743	12.3833	7.7	164	2430	2.43	2666	2.666	24	69.5	653_1	653
745	12.4167	7.7	165	2450	2.45	2700	2.7	23	70.3	653_1	653
748	12.4667	8	165	2520	2.52	2752	2.752	23	71.1	653_1	653
750	12.5	8	166	2600	2.6	2804	2.804	23	71.9	653_1	653
753	12.55	8	166	2649	2.649	2841	2.841	24	72.9	653_1	653
756	12.6	8	167	2697	2.697	2894	2.894	23	74	653_1	653
758	12.6333	8	167	2741	2.741	2935	2.935	24	75.2	653_1	653
761	12.6833	8	167	2770	2.77	2962	2.962	24	74.9	653_1	653
763	12.7167	8	167	2759	2.759	2960	2.96	24	74.8	653_1	653
765	12.75	8	167	2759	2.759	2960	2.96	24	74.8	653_1	653
768	12.8	8	167	2774	2.774	2980	2.98	24	75.3	653_1	653
770	12.8333	8	167	2798	2.798	3007	3.007	24	76.1	653_1	653
773	12.8833	8	167	2829	2.829	3036	3.036	24	76.7	653_1	653
775	12.9167	8	168	2843	2.843	3052	3.052	25	77.5	653_1	653
777	12.95	8.6	168	2865	2.865	3080	3.08	25	78.5	653_1	653
779	12.9833	8.6	168	2900	2.9	3103	3.103	26	78.9	653_1	653
782	13.0333	8.6	167	2917	2.917	3113	3.113	26	78.8	653_1	653
784	13.0667	8.6	167	2952	2.952	3140	3.14	27	79	653_1	653
786	13.1	8.6	167	2989	2.989	3179	3.179	27	80.3	653_1	653
788	13.1333	8.6	168	3021	3.021	3223	3.223	27	81.6	653_1	653
791	13.1833	8.6	167	3021	3.021	3223	3.223	27	81.6	653_1	653
793	13.2167	8.6	168	3056	3.056	3246	3.246	28	81.7	653_1	653
795	13.25	8.6	168	3109	3.109	3288	3.288	28	82	653_1	653
797	13.2833	8.6	168	3142	3.142	3326	3.326	28	82.6	653_1	653
800	13.3333	8.6	169	3117	3.117	3305	3.305	27	82	653_1	653
803	13.3833	8.6	169	3090	3.09	3279	3.279	26	80.5	653_1	653
805	13.4167	8.6	169	3111	3.111	3294	3.294	27	80.2	653_1	653
807	13.45	9	169	3177	3.177	3355	3.355	28	82	653_1	653
809	13.4833	9	170	3193	3.193	3386	3.386	27	82.8	653_1	653
811	13.5167	9	170	3196	3.196	3408	3.408	27	83.5	653_1	653
814	13.5667	9	171	3169	3.169	3398	3.398	26	83.2	653_1	653
816	13.6	9	171	3207	3.207	3424	3.424	27	84.1	653_1	653
818	13.6333	9	172	3241	3.241	3428	3.428	28	85.1	653_1	653
820	13.6667	9	172	3244	3.244	3439	3.439	28	86	653_1	653
822	13.7	9	171	3251	3.251	3464	3.464	28	87.2	653_1	653
824	13.7333	9	171	3267	3.267	3493	3.493	29	88.1	653_1	653
827	13.7833	9	171	3224	3.224	3474	3.474	28	87.2	653_1	653
829	13.8167	9	170	3293	3.293	3536	3.536	28	88	653_1	653
831	13.85	9	170	3328	3.328	3588	3.588	27	88.1	653_1	653
833	13.8833	9	170	3322	3.322	3588	3.588	27	88.2	653_1	653
836	13.9333	9	171	3378	3.378	3636	3.636	27	88.3	653_1	653
838	13.9667	9.5	171	3408	3.408	3668	3.668	27	88	653_1	653
840	14	9.5	172	3396	3.396	3662	3.662	27	87.5	653_1	653
842	14.0333	9.5	172	3416	3.416	3691	3.691	27	88.2	653_1	653
844	14.0667	9.5	173	3420	3.42	3706	3.706	28	89.1	653_1	653
847	14.1167	9.5	173	3375	3.375	3679	3.679	28	88.6	653_1	653
849	14.15	9.5	174	3331	3.331	3649	3.649	28	87.8	653_1	653
851	14.1833	9.5	174	3322	3.322	3643	3.643	28	87.7	653_1	653
853	14.2167	9.5	174	3322	3.322	3653	3.653	28	88.1	653_1	653
855	14.25	9.5	174	3369	3.369	3706	3.706	28	89.5	653_1	653
858	14.3	9.5	174	3393	3.393	3729	3.729	28	89.9	653_1	653
860	14.3333	9.5	174	3386	3.386	3733	3.733	28	90	653_1	653
862	14.3667	9.5	174	3448	3.448	3791	3.791	28	91.5	653_1	653
864	14.4	9.5	174	3449	3.449	3819	3.819	29	92.7	653_1	653
866	14.4333	9.5	175	3449	3.449	3840	3.84	29	93.3	653_1	653
868	14.4667	10.1	175	3436	3.436	3838	3.838	29	93.2	653_1	653
870	14.5	10.1	176	3439	3.439	3864	3.864	29	93.8	653_1	653
872	14.5333	10.1	176	3409	3.409	3870	3.87	29	93.9	653_1	653
875	14.5833	10.1	176	3396	3.396	3885	3.885	29	93.4	653_1	653
877	14.6167	10.1	176	3409	3.409	3871	3.871	29	93.1	653_1	653
879	14.65	10.1	176	3414	3.414	3900	3.9	29	93.5	653_1	653
881	14.6833	10.1	176	3425	3.425	3923	3.923	29	94.1	653_1	653
883	14.7167	10.1	176	3459	3.459	3965	3.965	29	95.8	653_1	653
885	14.75	10.1	176	3455	3.455	4027	4.027	29	97.4	653_1	653
887	14.7833	10.1	176	3492	3.492	4069	4.069	30	98	653_1	653
889	14.8167	10.1	176	3509	3.509	4094	4.094	30	98.6	653_1	653
891	14.85	10.1	176	3520	3.52	4132	4.132	30	99	653_1	653
893	14.8833	10.1	176	3544	3.544	4169	4.169	30	99.1	653_1	653
895	14.9167	10.1	177	3539	3.539	4161	4.161	30	98.2	653_1	653
896	14.9333	10.1	177	3548	3.548	4154	4.154	31	97.9	653_1	653
898	14.9667	10.1	178	3548	3.548	4203	4.203	31	98.4	653_1	653
900	15	10.4	178	3576	3.576	4234	4.234	31	99.2	653_1	653
902	15.0333	10.4	179	3544	3.544	4234	4.234	30	99.2	653_1	653
904	15.0667	10.4	179	3546	3.546	4268	4.268	31	100.1	653_1	653
906	15.1	10.4	179	3514	3.514	4266	4.266	31	100.7	653_1	653
908	15.1333	10.4	179	3520	3.52	4281	4.281	31	101.4	653_1	653
910	15.1667	10.4	179	3489	3.489	4256	4.256	31	100.5	653_1	653
912	15.2	10.4	179	3455	3.455	4223	4.223	31	99.7	653_1	653
914	15.2333	10.4	179	3445	3.445	4262	4.262	31	100.8	653_1	653
916	15.2667	10.4	179	3481	3.481	4311	4.311	32	101.8	653_1	653
918	15.3	10.4	179	3483	3.483	4337	4.337	31	102.3	653_1	653
919	15.3167	10.4	180	3514	3.514	4387	4.387	32	104	653_1	653
921	15.35	10.4	180	3506	3.506	4416	4.416	31	103.6	653_1	653
923	15.3833	10.4	180	3529	3.529	4469	4.469	32	105.4	653_1	653
925	15.4167	10.4	181	3539	3.539	4481	4.481	33	106.8	653_1	653
926	15.4333	10.4	181	3581	3.581	4494	4.494	34	106.9	653_1	653
928	15.4667	10.4	181	3515	3.515	4514	4.514	34	108.1	653_1	653
930	15.5	11.1	181	3495	3.495	4523	4.523	35	110.1	653_1	653
931	15.5167	11.1	181	3495	3.495	4574	4.574	35	111.7	653_1	653
933	15.55	11.1	181	3553	3.553	4689	4.689	36	115.2	653_1	653
934	15.5667	11.1	181	3557	3.557	4755	4.755	37	119.3	653_1	653
936	15.6	11.1	181	3561	3.561	4797	4.797	38	120.8	653_1	653
938	15.6333	11.1	182	3586	3.586	4881	4.881	38	122.2	653_1	653
939	15.65	11.1	182	3586	3.586	4881	4.881	38	122.2	653_1	653
941	15.6833	11.1	182	3563	3.563	4902	4.902	38	122.6	653_1	653
943	15.7167	11.1	182	3551	3.551	4892	4.892	37	121.8	653_1	653
944	15.7333	11.1	182	3550	3.55	4907	4.907	36	119.8	653_1	653
946	15.7667	11.1	183	3550	3.55	4906	4.906	36	119.8	653_1	653
947	15.7833	11.1	183	3585	3.585	4955	4.955	37	121	653_1	653
949	15.8167	11.1	183	3553	3.553	4923	4.923	37	120.5	653_1	653
951	15.85	11.1	183	3553	3.553	4923	4.923	37	120.5	653_1	653
952	15.8667	11.1	184	3555	3.555	4943	4.943	38	122.2	653_1	653
954	15.9	11.1	184	3529	3.529	4944	4.944	39	123.5	653_1	653
955	15.9167	11.1	184	3509	3.509	4946	4.946	41	125.6	653_1	653
956	15.9333	11.1	183	3468	3.468	4901	4.901	39	123.4	653_1	653
958	15.9667	11.1	184	3406	3.406	4858	4.858	39	122.7	653_1	653
959	15.9833	11.4	183	3379	3.379	4859	4.859	40	123.1	653_1	653
961	16.0167	11.4	182	3419	3.419	4903	4.903	41	125.3	653_1	653
963	16.05	11.4	181	3356	3.356	4843	4.843	41	123.8	653_1	653
965	16.0833	11.4	181	3296	3.296	4762	4.762	38	119.7	653_1	653
966	16.1	11.4	180	3277	3.277	4780	4.78	37	117	653_1	653
968	16.1333	11.4	179	3294	3.294	4851	4.851	35	115.7	653_1	653
970	16.1667	11.4	179	3210	3.21	4812	4.812	33	112.5	653_1	653
972	16.2	11.4	179	3170	3.17	4833	4.833	31	110	653_1	653
974	16.2333	11.4	179	3101	3.101	4729	4.729	31	107.5	653_1	653
977	16.2833	11.4	178	2998	2.998	4696	4.696	30	104.9	653_1	653
979	16.3167	4	176	2998	2.998	4786	4.786	30	104.7	653_1	653
981	16.35	4	175	2926	2.926	4752	4.752	29	103.2	653_1	653
983	16.3833	4	174	2874	2.874	4731	4.731	29	101.5	653_1	653
985	16.4167	4	173	2846	2.846	4771	4.771	29	101.7	653_1	653
987	16.45	4	172	2788	2.788	4733	4.733	29	102.9	653_1	653
989	16.4833	4	170	2783	2.783	4732	4.732	29	102.6	653_1	653
991	16.5167	4	169	2724	2.724	4731	4.731	29	103.6	653_1	653
993	16.55	4	167	2567	2.567	4538	4.538	29	102	653_1	653
995	16.5833	4	166	2407	2.407	4303	4.303	29	97.4	653_1	653
998	16.6333	4	164	2222	2.222	4080	4.08	27	94.2	653_1	653
1000	16.6667	4	163	2169	2.169	4048	4.048	27	93.5	653_1	653
1002	16.7	4	162	2143	2.143	4021	4.021	27	92.5	653_1	653
1004	16.7333	4	162	2131	2.131	3978	3.978	27	91.9	653_1	653
1006	16.7667	4	161	2127	2.127	3976	3.976	27	91.6	653_1	653
1009	16.8167	4	160	2109	2.109	3954	3.954	27	91	653_1	653
1011	16.85	4	159	2175	2.175	4108	4.108	27	95.5	653_1	653
1013	16.8833	4	158	2182	2.182	4154	4.154	28	98.5	653_1	653
1016	16.9333	4	157	2108	2.108	4057	4.057	28	97.3	653_1	653
1018	16.9667	4	156	1992	1.992	3917	3.917	27	97.2	653_1	653
1020	17	4	156	1888	1.888	3818	3.818	27	97.2	653_1	653
1022	17.0333	4	155	1849	1.849	3815	3.815	27	98.1	653_1	653
1025	17.0833	4	154	1866	1.866	3850	3.85	27	99.8	653_1	653
1027	17.1167	4	154	1811	1.811	3771	3.771	27	99.5	653_1	653
1029	17.15	4	153	1796	1.796	3739	3.739	27	97.9	653_1	653
1031	17.1833	4	152	1749	1.749	3656	3.656	27	98	653_1	653
1034	17.2333	4	150	1745	1.745	3630	3.63	27	97.2	653_1	653
1037	17.2833	4	149	1718	1.718	3555	3.555	26	95.3	653_1	653
1039	17.3167	4	147	1725	1.725	3498	3.498	27	93	653_1	653
1041	17.35	4	146	1725	1.725	3497	3.497	27	93	653_1	653
1044	17.4	4	145	1604	1.604	3198	3.198	26	83.9	653_1	653
1046	17.4333	4	145	1635	1.635	3180	3.18	26	82	653_1	653
1048	17.4667	4	144	1654	1.654	3178	3.178	25	82.1	653_1	653
1051	17.5167	4	144	1645	1.645	3136	3.136	26	81.8	653_1	653
1053	17.55	4	144	1745	1.745	3336	3.336	27	88.3	653_1	653
1055	17.5833	4	144	1687	1.687	3250	3.25	27	88.8	653_1	653
1058	17.6333	4	144	1549	1.549	2989	2.989	25	82.7	653_1	653
1060	17.6667	4	143	1687	1.687	3251	3.251	27	88.8	653_1	653
1063	17.7167	4	143	1676	1.676	3229	3.229	26	90.2	653_1	653
1066	17.7667	4	141	1627	1.627	3130	3.13	25	88.2	653_1	653
1068	17.8	4	140	1614	1.614	3096	3.096	26	88.6	653_1	653
1070	17.8333	4	139	1606	1.606	3077	3.077	26	89.5	653_1	653
1072	17.8667	4	138	1582	1.582	3026	3.026	25	88.6	653_1	653
1075	17.9167	4	137	1581	1.581	3018	3.018	26	89	653_1	653
1077	17.95	4	136	1530	1.53	2944	2.944	24	86.1	653_1	653
1080	18	4	136	1501	1.501	2883	2.883	24	84.5	653_1	653
1083	18.05	4	136	1523	1.523	2913	2.913	25	86.8	653_1	653
1085	18.0833	4	135	1502	1.502	2886	2.886	25	86.7	653_1	653
1087	18.1167	4	134	1513	1.513	2897	2.897	25	86.9	653_1	653
1090	18.1667	4	133	1462	1.462	2812	2.812	24	85.2	653_1	653
1092	18.2	4	131	1421	1.421	2719	2.719	25	84	653_1	653
1094	18.2333	4	128	1396	1.396	2660	2.66	26	83.4	653_1	653
1097	18.2833	4	126	1397	1.397	2660	2.66	26	83.4	653_1	653
1099	18.3167	4	124	1314	1.314	2512	2.512	26	80.6	653_1	653
1101	18.35	4	122	1231	1.231	2337	2.337	25	75	653_1	653
1104	18.4	4	121	1167	1.167	2248	2.248	24	72.9	653_1	653
1106	18.4333	4	121	1107	1.107	2144	2.144	25	70.5	653_1	653
1109	18.4833	4	121	1047	1.047	2055	2.055	24	68.8	653_1	653
1111	18.5167	4	120	1017	1.017	1995	1.995	24	67.7	653_1	653
1114	18.5667	4	121	1029	1.029	2032	2.032	25	70	653_1	653
1116	18.6	4	122	1043	1.043	2035	2.035	25	70.3	653_1	653
1118	18.6333	4	124	1095	1.095	2077	2.077	26	71.3	653_1	653
1121	18.6833	4	126	1153	1.153	2071	2.071	25	69.7	653_1	653
1123	18.7167	4	126	1244	1.244	2215	2.215	25	73.2	653_1	653
1125	18.75	4	126	1349	1.349	2338	2.338	25	76.7	653_1	653
1128	18.8	4	127	1349	1.349	2338	2.338	25	76.7	653_1	653
1130	18.8333	4	127	1407	1.407	2401	2.401	26	78	653_1	653
1132	18.8667	4	126	1406	1.406	2364	2.364	26	76.7	653_1	653
1134	18.9	4	125	1463	1.463	2468	2.468	26	80.5	653_1	653
1137	18.95	4	124	1461	1.461	2490	2.49	26	79.6	653_1	653
1140	19	4	124	1452	1.452	2477	2.477	25	79.1	653_1	653
1142	19.0333	4	123	1432	1.432	2448	2.448	24	77.9	653_1	653
1145	19.0833	4	123	1471	1.471	2526	2.526	25	83.9	653_1	653
1147	19.1167	4	123	1432	1.432	2450	2.45	24	81.2	653_1	653
1150	19.1667	4	123	1442	1.442	2458	2.458	24	82.7	653_1	653
1153	19.2167	4	124	1385	1.385	2377	2.377	22	80.3	653_1	653
1155	19.25	4	123	1406	1.406	2394	2.394	24	81.5	653_1	653
1157	19.2833	4	123	1406	1.406	2394	2.394	24	81.5	653_1	653
1160	19.3333	4	123	1395	1.395	2374	2.374	25	82	653_1	653
1163	19.3833	4	123	1370	1.37	2339	2.339	23	79.7	653_1	653
1166	19.4333	4	122	1391	1.391	2363	2.363	23	80.2	653_1	653
1168	19.4667	4	122	1372	1.372	2313	2.313	23	78.4	653_1	653
1171	19.5167	4	121	1383	1.383	2305	2.305	25	78.7	653_1	653
1173	19.55	4	121	1373	1.373	2287	2.287	24	78.4	653_1	653
1175	19.5833	4	121	1351	1.351	2247	2.247	25	77.9	653_1	653
1178	19.6333	4	121	1326	1.326	2204	2.204	24	75.8	653_1	653
1181	19.6833	4	121	1326	1.326	2204	2.204	24	75.8	653_1	653
1183	19.7167	4	121	1302	1.302	2170	2.17	23	74.4	653_1	653
1186	19.7667	4	121	1302	1.302	2174	2.174	22	74.6	653_1	653
1188	19.8	4	120	1292	1.292	2144	2.144	23	74.7	653_1	653
1191	19.85	4	121	1289	1.289	2133	2.133	23	74.2	653_1	653
1194	19.9	4	121	1274	1.274	2108	2.108	23	73.6	653_1	653
1197	19.95	4	121	1288	1.288	2098	2.098	24	73.3	653_1	653
1199	19.9833	4	121	1305	1.305	2116	2.116	24	73.8	653_1	653
1203	20.05	4	121	1299	1.299	2107	2.107	22	73.2	653_1	653
1205	20.0833	4	121	1295	1.295	2085	2.085	23	73.4	653_1	653
1207	20.1167	4	121	1307	1.307	2108	2.108	23	73.8	653_1	653
1210	20.1667	4	121	1297	1.297	2096	2.096	23	74.6	653_1	653
1212	20.2	4	121	1297	1.297	2096	2.096	23	74.6	653_1	653
1215	20.25	4	120	1274	1.274	2075	2.075	22	74.7	653_1	653
1217	20.2833	4	120	1265	1.265	2061	2.061	23	75	653_1	653
1219	20.3167	4	120	1267	1.267	2052	2.052	26	77.2	653_1	653
1221	20.35	4	120	1234	1.234	2002	2.002	25	75	653_1	653
1223	20.3833	4	121	1202	1.202	1944	1.944	26	73.1	653_1	653
1227	20.45	4	122	1159	1.159	1854	1.854	27	69.8	653_1	653
1229	20.4833	4	122	1186	1.186	1897	1.897	28	72.1	653_1	653
1231	20.5167	4	122	1215	1.215	1896	1.896	29	71.9	653_1	653
1234	20.5667	4	122	1237	1.237	1909	1.909	29	72.3	653_1	653
1236	20.6	4	123	1210	1.21	1845	1.845	27	67.5	653_1	653
1239	20.65	4	123	1245	1.245	1878	1.878	26	68.8	653_1	653
1241	20.6833	4	122	1301	1.301	1947	1.947	26	70.5	653_1	653
1243	20.7167	4	122	1350	1.35	2034	2.034	27	74.9	653_1	653
1246	20.7667	4	122	1292	1.292	1935	1.935	26	69.9	653_1	653
1250	20.8333	4	122	1270	1.27	1922	1.922	24	69	653_1	653
1252	20.8667	4	121	1270	1.27	1922	1.922	24	69	653_1	653
1254	20.9	4	120	1309	1.309	1965	1.965	24	71.6	653_1	653
1257	20.95	4	120	1327	1.327	1994	1.994	23	72.9	653_1	653
1259	20.9833	4	119	1306	1.306	1959	1.959	23	71.9	653_1	653
1262	21.0333	4	119	1279	1.279	1902	1.902	23	70.5	653_1	653
1264	21.0667	4	118	1310	1.31	1946	1.946	23	72.6	653_1	653
1266	21.1	4	118	1305	1.305	1939	1.939	24	75.1	653_1	653
1269	21.15	4	118	1288	1.288	1921	1.921	24	74.1	653_1	653
1271	21.1833	4	118	1263	1.263	1893	1.893	24	74.6	653_1	653
1273	21.2167	4	118	1233	1.233	1851	1.851	24	74	653_1	653
1276	21.2667	4	118	1242	1.242	1859	1.859	24	75.7	653_1	653
1279	21.3167	4	119	1242	1.242	1859	1.859	24	75.7	653_1	653
1282	21.3667	4	119	1247	1.247	1868	1.868	24	75	653_1	653
1285	21.4167	4	119	1257	1.257	1862	1.862	25	73.8	653_1	653
1288	21.4667	4	119	1231	1.231	1827	1.827	22	72.2	653_1	653
1291	21.5167	4	119	1232	1.232	1822	1.822	21	71	653_1	653
1293	21.55	4	119	1239	1.239	1822	1.822	22	70.8	653_1	653
1295	21.5833	4	119	1212	1.212	1777	1.777	22	69.8	653_1	653
1298	21.6333	4	119	1198	1.198	1790	1.79	22	70.9	653_1	653
1301	21.6833	4	119	1184	1.184	1770	1.77	22	70.5	653_1	653
1303	21.7167	4	119	1176	1.176	1753	1.753	22	69.4	653_1	653
1306	21.7667	4	119	1177	1.177	1735	1.735	24	68	653_1	653
1308	21.8	4	119	1181	1.181	1729	1.729	24	67.8	653_1	653
