# Supplementary material for: On the development of diagnostic support algorithms based on CPET biosignals data via machine learning and wavelets
Source: PeerJ journal article supplement (doi:10.7717/peerj-cs.2474), 2025-01-30
Supplement: raw_data.zip [file Subject_35.xlsx]

## Sheet: Folha1
time	time	Speed	HR	VO2	VO2	VCO2	VCO2	RR	VE	ID_test	ID
	min	km/h	/min	ml/min	L/min	ml/min	L/min	/min	L/min
0	0	4.9	68	1624	1.624	876	0.876	35	31.8	756_1	756
2	0.0333333	4.9	70	1688	1.688	956	0.956	28	33.4	756_1	756
4	0.0666667	4.9	70	1626	1.626	878	0.878	35	31.8	756_1	756
7	0.116667	4.9	71	1362	1.362	763	0.763	29	28.5	756_1	756
10	0.166667	4.9	73	1255	1.255	743	0.743	25	27.6	756_1	756
16	0.266667	4.9	82	1215	1.215	805	0.805	19	29.3	756_1	756
18	0.3	4.9	84	1173	1.173	775	0.775	19	28.3	756_1	756
20	0.333333	4.9	84	1054	1.054	727	0.727	19	26.8	756_1	756
24	0.4	4.9	86	942	0.942	610	0.61	24	23.3	756_1	756
26	0.433333	4.9	87	874	0.874	568	0.568	24	21.6	756_1	756
29	0.483333	4.9	80	798	0.798	511	0.511	25	19.7	756_1	756
32	0.533333	4.9	85	886	0.886	549	0.549	23	19.9	756_1	756
37	0.616667	4.9	80	785	0.785	480	0.48	22	17.5	756_1	756
39	0.65	4.9	80	905	0.905	534	0.534	20	18.4	756_1	756
44	0.733333	4.9	80	994	0.994	572	0.572	19	19.2	756_1	756
47	0.783333	4.9	80	1047	1.047	612	0.612	21	21	756_1	756
49	0.816667	4.9	79	1078	1.078	635	0.635	21	21.6	756_1	756
52	0.866667	4.9	78	1107	1.107	653	0.653	21	22	756_1	756
54	0.9	4.9	77	1149	1.149	677	0.677	23	22.9	756_1	756
58	0.966667	4.9	77	1322	1.322	787	0.787	20	26.5	756_1	756
61	1.01667	4.9	76	1352	1.352	810	0.81	19	27.2	756_1	756
64	1.06667	4.9	75	1222	1.222	733	0.733	21	24.5	756_1	756
67	1.11667	4.9	75	1260	1.26	756	0.756	22	25.1	756_1	756
69	1.15	4.9	75	1270	1.27	765	0.765	22	25.4	756_1	756
72	1.2	4.9	75	1301	1.301	784	0.784	21	26	756_1	756
75	1.25	4.9	76	1256	1.256	773	0.773	20	25.8	756_1	756
78	1.3	4.9	76	1201	1.201	750	0.75	21	25.3	756_1	756
81	1.35	4.9	76	1159	1.159	715	0.715	22	24.3	756_1	756
84	1.4	4.9	76	1124	1.124	697	0.697	22	23.6	756_1	756
87	1.45	4.9	76	1136	1.136	705	0.705	22	23.7	756_1	756
90	1.5	4.9	77	1180	1.18	740	0.74	21	24.7	756_1	756
93	1.55	4.9	77	1176	1.176	745	0.745	21	24.6	756_1	756
97	1.61667	4.9	77	1202	1.202	754	0.754	21	24.8	756_1	756
100	1.66667	4.9	77	1174	1.174	746	0.746	21	24.7	756_1	756
102	1.7	4.9	76	1177	1.177	758	0.758	22	25.4	756_1	756
104	1.73333	4.9	77	1210	1.21	776	0.776	22	25.7	756_1	756
107	1.78333	4.9	77	1165	1.165	757	0.757	24	25.6	756_1	756
109	1.81667	4.9	77	1065	1.065	710	0.71	25	24.5	756_1	756
112	1.86667	4.9	77	1041	1.041	695	0.695	26	24.4	756_1	756
114	1.9	4.9	77	1041	1.041	695	0.695	26	24.4	756_1	756
118	1.96667	4.9	77	1148	1.148	759	0.759	26	26.1	756_1	756
120	2	4.9	78	1149	1.149	754	0.754	26	26.2	756_1	756
123	2.05	4.9	78	1117	1.117	736	0.736	25	25.7	756_1	756
127	2.11667	4.9	78	1104	1.104	732	0.732	23	25	756_1	756
131	2.18333	4.9	78	1200	1.2	812	0.812	22	28.3	756_1	756
133	2.21667	4.9	78	1252	1.252	865	0.865	23	30.4	756_1	756
135	2.25	4.9	78	1220	1.22	853	0.853	24	30.5	756_1	756
138	2.3	4.9	78	1058	1.058	739	0.739	25	27.3	756_1	756
141	2.35	4.9	78	1056	1.056	753	0.753	24	27.4	756_1	756
144	2.4	4.9	77	1046	1.046	753	0.753	24	27.1	756_1	756
146	2.43333	4.9	77	1114	1.114	801	0.801	24	28	756_1	756
149	2.48333	4.9	78	1061	1.061	757	0.757	23	25.9	756_1	756
151	2.51667	4.9	78	1006	1.006	710	0.71	23	24.1	756_1	756
154	2.56667	4.9	79	1006	1.006	711	0.711	22	24.3	756_1	756
159	2.65	4.9	80	1006	1.006	711	0.711	22	24.3	756_1	756
161	2.68333	4.9	80	1030	1.03	720	0.72	22	24.4	756_1	756
164	2.73333	4.9	81	1145	1.145	789	0.789	22	26.5	756_1	756
167	2.78333	4.9	81	1154	1.154	788	0.788	22	26.4	756_1	756
170	2.83333	4.9	81	1184	1.184	813	0.813	21	27.2	756_1	756
173	2.88333	4.9	80	1215	1.215	840	0.84	20	27.9	756_1	756
176	2.93333	4.9	80	1230	1.23	846	0.846	20	27.9	756_1	756
179	2.98333	4.9	80	1236	1.236	855	0.855	20	28.1	756_1	756
182	3.03333	4.9	79	1174	1.174	819	0.819	20	26.9	756_1	756
185	3.08333	4.9	78	1160	1.16	807	0.807	21	26.4	756_1	756
188	3.13333	4.9	78	1158	1.158	810	0.81	21	26.5	756_1	756
192	3.2	4.9	79	1158	1.158	810	0.81	21	26.5	756_1	756
194	3.23333	4.9	79	1158	1.158	810	0.81	21	26.5	756_1	756
197	3.28333	4.9	79	1093	1.093	780	0.78	21	26.1	756_1	756
200	3.33333	4.9	78	1029	1.029	746	0.746	22	25.5	756_1	756
202	3.36667	4.9	79	982	0.982	713	0.713	23	24.7	756_1	756
205	3.41667	4.9	80	986	0.986	715	0.715	23	24.7	756_1	756
208	3.46667	4.9	79	971	0.971	702	0.702	22	24.1	756_1	756
211	3.51667	4.9	78	951	0.951	688	0.688	23	23.7	756_1	756
214	3.56667	4.9	78	1034	1.034	733	0.733	22	24.4	756_1	756
217	3.61667	4.9	79	1103	1.103	772	0.772	21	25.2	756_1	756
220	3.66667	4.9	79	1138	1.138	799	0.799	20	25.9	756_1	756
222	3.7	4.9	80	1158	1.158	814	0.814	21	26.4	756_1	756
226	3.76667	4.9	80	1127	1.127	793	0.793	21	25.8	756_1	756
229	3.81667	4.9	80	1087	1.087	767	0.767	21	25.1	756_1	756
231	3.85	4.9	80	1101	1.101	776	0.776	21	25.5	756_1	756
234	3.9	4.9	78	1107	1.107	784	0.784	21	25.6	756_1	756
237	3.95	4.9	78	1128	1.128	798	0.798	21	26.1	756_1	756
240	4	4.9	78	1139	1.139	810	0.81	21	26.6	756_1	756
243	4.05	4.9	78	1124	1.124	805	0.805	21	26.6	756_1	756
245	4.08333	4.9	79	1147	1.147	825	0.825	21	27.2	756_1	756
248	4.13333	4.9	79	1147	1.147	825	0.825	21	27.2	756_1	756
251	4.18333	4.9	78	1106	1.106	799	0.799	21	26.3	756_1	756
254	4.23333	4.9	79	1084	1.084	786	0.786	22	25.7	756_1	756
256	4.26667	4.9	78	1080	1.08	779	0.779	22	25.3	756_1	756
259	4.31667	4.9	78	1057	1.057	765	0.765	22	25	756_1	756
262	4.36667	4.9	78	1062	1.062	768	0.768	21	24.8	756_1	756
265	4.41667	4.9	78	1103	1.103	792	0.792	21	25.4	756_1	756
268	4.46667	4.9	79	1118	1.118	807	0.807	21	26.1	756_1	756
274	4.56667	4.9	79	1118	1.118	808	0.808	21	26.1	756_1	756
278	4.63333	4.9	80	1127	1.127	836	0.836	20	27.2	756_1	756
281	4.68333	4.9	80	1086	1.086	831	0.831	17	26.6	756_1	756
284	4.73333	4.9	79	1106	1.106	845	0.845	17	26.9	756_1	756
287	4.78333	4.9	78	1133	1.133	863	0.863	17	27.3	756_1	756
289	4.81667	4.9	79	1104	1.104	836	0.836	17	26.4	756_1	756
292	4.86667	4.9	79	1102	1.102	810	0.81	18	25.5	756_1	756
295	4.91667	4.9	79	1140	1.14	808	0.808	21	25.8	756_1	756
298	4.96667	4.9	80	1088	1.088	776	0.776	21	25.1	756_1	756
301	5.01667	4.9	81	1100	1.1	786	0.786	21	25.4	756_1	756
303	5.05	4.9	82	1075	1.075	766	0.766	21	24.9	756_1	756
306	5.1	4.9	82	1073	1.073	761	0.761	21	24.7	756_1	756
309	5.15	4.9	82	1093	1.093	772	0.772	22	25.1	756_1	756
312	5.2	4.9	80	1088	1.088	776	0.776	22	25.3	756_1	756
314	5.23333	4.9	80	1086	1.086	776	0.776	22	25.4	756_1	756
317	5.28333	4.9	78	1099	1.099	791	0.791	22	26	756_1	756
320	5.33333	4.9	77	1100	1.1	791	0.791	22	26	756_1	756
323	5.38333	4.9	77	1061	1.061	771	0.771	21	25.5	756_1	756
327	5.45	4.9	77	1074	1.074	784	0.784	21	26	756_1	756
330	5.5	4.9	77	1061	1.061	780	0.78	21	25.8	756_1	756
333	5.55	4.9	76	1026	1.026	751	0.751	21	25	756_1	756
335	5.58333	4.9	76	1013	1.013	743	0.743	20	24.7	756_1	756
338	5.63333	4.9	76	1005	1.005	737	0.737	20	24.3	756_1	756
341	5.68333	4.9	77	1038	1.038	755	0.755	21	24.7	756_1	756
344	5.73333	4.9	77	1048	1.048	767	0.767	20	25	756_1	756
347	5.78333	4.9	77	1048	1.048	767	0.767	20	25	756_1	756
350	5.83333	4.9	76	1039	1.039	754	0.754	21	24.8	756_1	756
353	5.88333	4.9	76	1050	1.05	766	0.766	21	25	756_1	756
356	5.93333	4.9	77	1049	1.049	762	0.762	21	24.8	756_1	756
359	5.98333	4.9	77	1037	1.037	752	0.752	21	24.5	756_1	756
362	6.03333	4.9	76	1040	1.04	757	0.757	20	24.6	756_1	756
364	6.06667	4.9	77	1033	1.033	749	0.749	21	24.4	756_1	756
367	6.11667	4.9	77	1018	1.018	738	0.738	21	24.2	756_1	756
370	6.16667	4.9	77	1030	1.03	746	0.746	21	24.5	756_1	756
373	6.21667	4.9	77	1016	1.016	736	0.736	21	24.3	756_1	756
375	6.25	4.9	77	1023	1.023	741	0.741	21	24.5	756_1	756
378	6.3	4.9	77	1076	1.076	776	0.776	21	25.5	756_1	756
381	6.35	4.9	77	1057	1.057	762	0.762	20	25	756_1	756
384	6.4	4.9	74	1064	1.064	769	0.769	20	25.2	756_1	756
387	6.45	4.9	71	1048	1.048	757	0.757	20	24.9	756_1	756
390	6.5	4.9	72	1039	1.039	751	0.751	20	24.6	756_1	756
393	6.55	4.9	72	1077	1.077	780	0.78	20	25.4	756_1	756
396	6.6	4.9	72	1026	1.026	749	0.749	20	24.6	756_1	756
399	6.65	4.9	75	1027	1.027	749	0.749	20	24.6	756_1	756
402	6.7	4.9	76	1056	1.056	779	0.779	20	25.6	756_1	756
404	6.73333	4.9	78	1029	1.029	760	0.76	21	25.1	756_1	756
408	6.8	4.9	78	1021	1.021	758	0.758	20	25.1	756_1	756
411	6.85	4.9	78	1044	1.044	779	0.779	21	25.9	756_1	756
414	6.9	4.9	78	1026	1.026	766	0.766	21	25.5	756_1	756
417	6.95	4.9	79	1026	1.026	763	0.763	21	25.2	756_1	756
422	7.03333	4.9	78	1034	1.034	764	0.764	21	25.1	756_1	756
425	7.08333	4.9	77	971	0.971	724	0.724	20	24.2	756_1	756
427	7.11667	4.9	78	978	0.978	732	0.732	21	24.4	756_1	756
430	7.16667	4.9	78	987	0.987	734	0.734	21	24.3	756_1	756
433	7.21667	4.9	78	947	0.947	707	0.707	22	23.7	756_1	756
435	7.25	4.9	77	938	0.938	702	0.702	22	23.7	756_1	756
438	7.3	4.9	77	938	0.938	701	0.701	23	23.7	756_1	756
441	7.35	4.9	78	940	0.94	695	0.695	23	23.7	756_1	756
443	7.38333	4.9	78	972	0.972	717	0.717	23	24.1	756_1	756
446	7.43333	4.9	78	972	0.972	711	0.711	22	24	756_1	756
449	7.48333	4.9	78	972	0.972	711	0.711	22	24	756_1	756
451	7.51667	4.9	78	978	0.978	706	0.706	22	23.8	756_1	756
454	7.56667	4.9	78	1011	1.011	727	0.727	22	24.2	756_1	756
457	7.61667	4.9	78	1025	1.025	736	0.736	21	24.4	756_1	756
460	7.66667	4.9	78	1047	1.047	753	0.753	21	24.7	756_1	756
463	7.71667	4.9	78	1012	1.012	729	0.729	21	24.1	756_1	756
466	7.76667	4.9	77	1049	1.049	754	0.754	21	24.6	756_1	756
468	7.8	4.9	77	1083	1.083	778	0.778	21	25.1	756_1	756
471	7.85	4.9	77	1093	1.093	787	0.787	21	25.5	756_1	756
474	7.9	4.9	77	1065	1.065	768	0.768	21	25.1	756_1	756
476	7.93333	4.9	77	1064	1.064	768	0.768	21	25.3	756_1	756
479	7.98333	4.9	77	1038	1.038	753	0.753	21	25	756_1	756
482	8.03333	4.9	78	1038	1.038	753	0.753	21	25	756_1	756
485	8.08333	4.9	78	1002	1.002	728	0.728	22	24.4	756_1	756
488	8.13333	4.9	78	1002	1.002	728	0.728	22	24.4	756_1	756
491	8.18333	4.9	78	964	0.964	701	0.701	22	23.4	756_1	756
494	8.23333	4.9	78	1003	1.003	724	0.724	21	23.8	756_1	756
497	8.28333	4.9	78	982	0.982	707	0.707	21	23.2	756_1	756
500	8.33333	4.9	78	1041	1.041	744	0.744	21	24	756_1	756
503	8.38333	4.9	78	1013	1.013	732	0.732	21	24.3	756_1	756
505	8.41667	4.9	78	1048	1.048	757	0.757	22	25	756_1	756
508	8.46667	4.9	79	961	0.961	708	0.708	22	24	756_1	756
511	8.51667	4.9	79	959	0.959	719	0.719	22	24.5	756_1	756
513	8.55	4.9	79	907	0.907	694	0.694	23	24.1	756_1	756
516	8.6	4.9	79	915	0.915	705	0.705	23	24.4	756_1	756
519	8.65	4.9	80	930	0.93	709	0.709	22	23.9	756_1	756
521	8.68333	4.9	80	944	0.944	721	0.721	23	24.8	756_1	756
524	8.73333	4.9	80	956	0.956	719	0.719	22	24.1	756_1	756
527	8.78333	4.9	80	986	0.986	734	0.734	22	24.6	756_1	756
529	8.81667	4.9	80	1014	1.014	750	0.75	22	25	756_1	756
532	8.86667	4.9	81	1014	1.014	750	0.75	22	25	756_1	756
535	8.91667	4.9	81	1023	1.023	754	0.754	22	25	756_1	756
548	9.13333	4.9	82	1046	1.046	766	0.766	22	25.5	756_1	756
551	9.18333	4.9	83	1022	1.022	748	0.748	22	25	756_1	756
553	9.21667	4.9	84	1062	1.062	826	0.826	20	28.5	756_1	756
555	9.25	4.9	85	1054	1.054	834	0.834	22	29.3	756_1	756
558	9.3	4.9	85	1027	1.027	834	0.834	22	29.6	756_1	756
560	9.33333	4.9	86	1025	1.025	846	0.846	22	30.2	756_1	756
562	9.36667	4.9	87	1022	1.022	857	0.857	23	30.9	756_1	756
565	9.41667	4.9	83	988	0.988	801	0.801	26	28.2	756_1	756
567	9.45	4.9	83	1017	1.017	820	0.82	26	29	756_1	756
570	9.5	4.9	82	1005	1.005	810	0.81	25	28.5	756_1	756
572	9.53333	4.9	81	1027	1.027	816	0.816	24	28.4	756_1	756
574	9.56667	4.9	85	1041	1.041	817	0.817	24	28.4	756_1	756
578	9.63333	4.9	84	1055	1.055	826	0.826	25	28.9	756_1	756
581	9.68333	4.9	84	1037	1.037	841	0.841	24	29.9	756_1	756
583	9.71667	4.9	84	1031	1.031	833	0.833	24	29.7	756_1	756
586	9.76667	4.9	84	991	0.991	820	0.82	23	29.8	756_1	756
588	9.8	4.9	84	968	0.968	819	0.819	23	30.1	756_1	756
590	9.83333	4.9	84	926	0.926	796	0.796	24	29.7	756_1	756
592	9.86667	4.9	84	905	0.905	782	0.782	23	29	756_1	756
595	9.91667	4.9	84	878	0.878	733	0.733	25	26.9	756_1	756
597	9.95	6.1	85	847	0.847	697	0.697	26	25.4	756_1	756
599	9.98333	6.1	86	829	0.829	653	0.653	28	23.6	756_1	756
601	10.0167	6.1	88	822	0.822	627	0.627	29	22.5	756_1	756
604	10.0667	6.1	90	831	0.831	607	0.607	28	20.9	756_1	756
606	10.1	6.1	92	870	0.87	642	0.642	26	21.6	756_1	756
609	10.15	6.1	94	950	0.95	670	0.67	27	22.1	756_1	756
612	10.2	6.1	95	1066	1.066	739	0.739	26	23.6	756_1	756
615	10.25	6.1	96	1157	1.157	819	0.819	25	26.4	756_1	756
618	10.3	6.1	96	1213	1.213	868	0.868	22	27.8	756_1	756
621	10.35	6.1	97	1288	1.288	930	0.93	22	29.4	756_1	756
625	10.4167	6.1	98	1289	1.289	930	0.93	22	29.4	756_1	756
626	10.4333	6.1	98	1307	1.307	948	0.948	22	30.1	756_1	756
628	10.4667	6.1	99	1298	1.298	941	0.941	24	30.8	756_1	756
631	10.5167	6.1	99	1292	1.292	935	0.935	22	30.3	756_1	756
633	10.55	6.1	99	1317	1.317	941	0.941	24	30.5	756_1	756
636	10.6	6.1	100	1425	1.425	1008	1.008	26	33.2	756_1	756
638	10.6333	6.1	101	1506	1.506	1063	1.063	28	36	756_1	756
640	10.6667	6.1	101	1532	1.532	1094	1.094	28	37.4	756_1	756
642	10.7	6.1	102	1645	1.645	1168	1.168	27	39.5	756_1	756
644	10.7333	6.1	103	1726	1.726	1244	1.244	27	41.8	756_1	756
646	10.7667	6.1	104	1736	1.736	1266	1.266	27	43.1	756_1	756
648	10.8	6.1	104	1701	1.701	1259	1.259	28	43.3	756_1	756
650	10.8333	6.1	104	1752	1.752	1314	1.314	29	44.9	756_1	756
652	10.8667	6.1	104	1807	1.807	1367	1.367	30	46.5	756_1	756
654	10.9	6.1	105	1916	1.916	1448	1.448	32	49	756_1	756
656	10.9333	6.1	105	1793	1.793	1361	1.361	30	46.3	756_1	756
658	10.9667	6.1	105	1762	1.762	1349	1.349	29	45.4	756_1	756
660	11	7	105	1882	1.882	1429	1.429	31	47.9	756_1	756
661	11.0167	7	106	1786	1.786	1366	1.366	31	46.1	756_1	756
662	11.0333	7	107	1624	1.624	1246	1.246	35	43.6	756_1	756
663	11.05	7	107	1625	1.625	1248	1.248	35	43.6	756_1	756
665	11.0833	7	108	1614	1.614	1222	1.222	34	42	756_1	756
669	11.15	7	108	1745	1.745	1350	1.35	29	46.3	756_1	756
671	11.1833	7	108	1729	1.729	1333	1.333	30	45.9	756_1	756
672	11.2	7	109	1665	1.665	1282	1.282	30	44.3	756_1	756
674	11.2333	7	110	1772	1.772	1347	1.347	28	45.3	756_1	756
676	11.2667	7	110	1845	1.845	1389	1.389	28	46.3	756_1	756
678	11.3	7	110	1867	1.867	1367	1.367	31	44.6	756_1	756
680	11.3333	7	111	1904	1.904	1395	1.395	31	45.8	756_1	756
683	11.3833	7	112	1905	1.905	1395	1.395	31	45.8	756_1	756
685	11.4167	7	112	1986	1.986	1462	1.462	30	47.7	756_1	756
687	11.45	7	112	1987	1.987	1462	1.462	30	47.7	756_1	756
690	11.5	7	113	1990	1.99	1489	1.489	28	48.6	756_1	756
691	11.5167	7	113	1989	1.989	1505	1.505	28	49.3	756_1	756
694	11.5667	7	113	1969	1.969	1512	1.512	27	49.5	756_1	756
696	11.6	7	113	1900	1.9	1474	1.474	27	48.8	756_1	756
698	11.6333	7	113	1861	1.861	1451	1.451	27	47.5	756_1	756
701	11.6833	7	114	1861	1.861	1450	1.45	27	47.5	756_1	756
703	11.7167	7	114	1862	1.862	1446	1.446	27	47.1	756_1	756
705	11.75	7	114	1853	1.853	1428	1.428	29	46.5	756_1	756
707	11.7833	7	114	1820	1.82	1390	1.39	29	45.5	756_1	756
709	11.8167	7	114	1892	1.892	1420	1.42	31	46.9	756_1	756
710	11.8333	7	114	1949	1.949	1457	1.457	32	47.8	756_1	756
712	11.8667	7	114	2040	2.04	1513	1.513	33	50.5	756_1	756
714	11.9	7	114	1991	1.991	1498	1.498	33	50.1	756_1	756
716	11.9333	7	114	2059	2.059	1562	1.562	32	51.9	756_1	756
718	11.9667	7	114	2062	2.062	1575	1.575	32	52.4	756_1	756
720	12	8	115	2062	2.062	1575	1.575	32	52.4	756_1	756
722	12.0333	8	115	1951	1.951	1518	1.518	30	50.9	756_1	756
724	12.0667	8	115	1929	1.929	1501	1.501	30	50	756_1	756
726	12.1	8	116	1934	1.934	1481	1.481	29	48.5	756_1	756
729	12.15	8	116	1911	1.911	1454	1.454	29	47.3	756_1	756
732	12.2	8	116	1911	1.911	1454	1.454	29	47.3	756_1	756
733	12.2167	8	117	1918	1.918	1452	1.452	29	46.8	756_1	756
736	12.2667	8	118	1989	1.989	1483	1.483	29	47.5	756_1	756
738	12.3	8	118	2063	2.063	1556	1.556	27	50	756_1	756
740	12.3333	8	119	2105	2.105	1594	1.594	26	51.3	756_1	756
742	12.3667	8	119	2140	2.14	1631	1.631	26	52.8	756_1	756
744	12.4	8	119	2203	2.203	1676	1.676	27	54.9	756_1	756
746	12.4333	8	119	2188	2.188	1654	1.654	31	55.1	756_1	756
747	12.45	8	120	2247	2.247	1700	1.7	31	56.1	756_1	756
749	12.4833	8	120	2256	2.256	1719	1.719	32	57.6	756_1	756
751	12.5167	8	120	2227	2.227	1707	1.707	33	57.9	756_1	756
753	12.55	8	120	2196	2.196	1689	1.689	35	58.2	756_1	756
755	12.5833	8	121	2145	2.145	1670	1.67	34	57	756_1	756
757	12.6167	8	121	2074	2.074	1626	1.626	33	55.3	756_1	756
759	12.65	8	122	2136	2.136	1674	1.674	33	56.4	756_1	756
761	12.6833	8	122	2167	2.167	1691	1.691	32	56.8	756_1	756
763	12.7167	8	123	2135	2.135	1671	1.671	32	56.3	756_1	756
765	12.75	8	123	2129	2.129	1678	1.678	31	56.4	756_1	756
767	12.7833	8	124	2129	2.129	1678	1.678	31	56.4	756_1	756
769	12.8167	8	124	2135	2.135	1681	1.681	32	56.4	756_1	756
771	12.85	8	124	2235	2.235	1737	1.737	31	57.7	756_1	756
773	12.8833	8	123	2120	2.12	1670	1.67	31	55.6	756_1	756
776	12.9333	8	123	1992	1.992	1595	1.595	31	54.3	756_1	756
777	12.95	8	123	2009	2.009	1569	1.569	32	52.9	756_1	756
778	12.9667	9	122	1735	1.735	1317	1.317	30	44.2	756_1	756
780	13	9	122	1844	1.844	1381	1.381	30	45.6	756_1	756
781	13.0167	9	122	2001	2.001	1450	1.45	32	47.6	756_1	756
782	13.0333	9	122	2056	2.056	1457	1.457	35	48.7	756_1	756
785	13.0833	9	122	2252	2.252	1588	1.588	33	52.1	756_1	756
787	13.1167	9	122	2694	2.694	1940	1.94	36	64.5	756_1	756
788	13.1333	9	122	2743	2.743	2014	2.014	35	67.1	756_1	756
791	13.1833	9	123	2744	2.744	2015	2.015	35	67.1	756_1	756
793	13.2167	9	123	2552	2.552	1919	1.919	33	64.2	756_1	756
794	13.2333	9	123	2444	2.444	1865	1.865	32	61.9	756_1	756
796	13.2667	9	123	2412	2.412	1838	1.838	32	60.4	756_1	756
798	13.3	9	123	2377	2.377	1821	1.821	35	60.9	756_1	756
800	13.3333	9	124	2340	2.34	1803	1.803	35	59.9	756_1	756
801	13.35	9	124	2369	2.369	1829	1.829	34	60.4	756_1	756
803	13.3833	9	124	2411	2.411	1873	1.873	35	63	756_1	756
805	13.4167	9	125	2412	2.412	1874	1.874	35	63	756_1	756
807	13.45	9	125	2351	2.351	1851	1.851	35	62.9	756_1	756
809	13.4833	9	126	2374	2.374	1886	1.886	35	64.3	756_1	756
810	13.5	9	126	2367	2.367	1897	1.897	35	65.1	756_1	756
812	13.5333	9	126	2371	2.371	1913	1.913	35	66.1	756_1	756
814	13.5667	9	126	2357	2.357	1911	1.911	35	65.5	756_1	756
816	13.6	9	127	2347	2.347	1916	1.916	34	65.2	756_1	756
818	13.6333	9	127	2379	2.379	1944	1.944	34	66.6	756_1	756
820	13.6667	9	127	2380	2.38	1945	1.945	34	66.6	756_1	756
822	13.7	9	127	2339	2.339	1919	1.919	32	65.2	756_1	756
824	13.7333	9	127	2259	2.259	1838	1.838	32	63.5	756_1	756
826	13.7667	9	127	2211	2.211	1794	1.794	31	61.1	756_1	756
828	13.8	9	127	2228	2.228	1814	1.814	30	61.6	756_1	756
830	13.8333	9	127	2265	2.265	1803	1.803	31	61.3	756_1	756
831	13.85	9	126	2262	2.262	1791	1.791	31	60.8	756_1	756
834	13.9	9	126	2220	2.22	1758	1.758	30	58.9	756_1	756
835	13.9167	9	127	2387	2.387	1845	1.845	31	61.5	756_1	756
837	13.95	9	127	2576	2.576	1978	1.978	33	66	756_1	756
838	13.9667	9	127	2818	2.818	2145	2.145	37	72.4	756_1	756
840	14	10.1	128	2666	2.666	2053	2.053	35	71.7	756_1	756
842	14.0333	10.1	128	2489	2.489	1949	1.949	34	68.1	756_1	756
844	14.0667	10.1	129	2525	2.525	1982	1.982	34	69	756_1	756
846	14.1	10.1	130	2693	2.693	2107	2.107	35	73.9	756_1	756
847	14.1167	10.1	130	2560	2.56	2039	2.039	37	72.9	756_1	756
849	14.15	10.1	130	2517	2.517	2063	2.063	33	73.1	756_1	756
851	14.1833	10.1	130	2456	2.456	1970	1.97	37	70.3	756_1	756
852	14.2	10.1	130	2420	2.42	1915	1.915	41	67.2	756_1	756
854	14.2333	10.1	130	2419	2.419	1915	1.915	41	67.2	756_1	756
855	14.25	10.1	130	2492	2.492	1947	1.947	43	67.9	756_1	756
857	14.2833	10.1	130	2461	2.461	1904	1.904	43	65.7	756_1	756
858	14.3	10.1	130	2446	2.446	1881	1.881	42	64.8	756_1	756
860	14.3333	10.1	130	2432	2.432	1880	1.88	40	64.2	756_1	756
862	14.3667	10.1	130	2482	2.482	1900	1.9	39	64.3	756_1	756
863	14.3833	10.1	130	2550	2.55	1950	1.95	37	65	756_1	756
866	14.4333	10.1	131	2569	2.569	1988	1.988	34	65.8	756_1	756
867	14.45	10.1	131	2550	2.55	1950	1.95	37	65	756_1	756
869	14.4833	10.1	131	2562	2.562	1980	1.98	36	65.9	756_1	756
871	14.5167	10.1	131	2619	2.619	2036	2.036	34	67.8	756_1	756
873	14.55	10.1	131	2623	2.623	2062	2.062	34	70.3	756_1	756
874	14.5667	10.1	131	2637	2.637	2099	2.099	36	72.3	756_1	756
875	14.5833	10.1	131	2664	2.664	2156	2.156	37	75.7	756_1	756
877	14.6167	10.1	131	2685	2.685	2232	2.232	37	80.4	756_1	756
879	14.65	10.1	132	2683	2.683	2237	2.237	37	80.6	756_1	756
880	14.6667	10.1	132	2649	2.649	2224	2.224	39	81.2	756_1	756
881	14.6833	10.1	132	2571	2.571	2118	2.118	43	77.3	756_1	756
883	14.7167	10.1	133	2544	2.544	2089	2.089	45	75.9	756_1	756
884	14.7333	10.1	133	2518	2.518	2073	2.073	43	74.2	756_1	756
886	14.7667	10.1	133	2449	2.449	2025	2.025	39	71.4	756_1	756
888	14.8	10.1	133	2392	2.392	1973	1.973	39	69.4	756_1	756
890	14.8333	10.1	133	2361	2.361	1950	1.95	37	68.1	756_1	756
891	14.85	10.1	134	2405	2.405	1963	1.963	36	67	756_1	756
893	14.8833	10.1	134	2441	2.441	1990	1.99	36	67.7	756_1	756
894	14.9	10.1	134	2405	2.405	1953	1.953	36	66.6	756_1	756
896	14.9333	10.1	134	2429	2.429	1957	1.957	36	66.4	756_1	756
897	14.95	10.1	134	2426	2.426	1932	1.932	37	66.3	756_1	756
899	14.9833	11.1	134	2497	2.497	1992	1.992	38	67.6	756_1	756
901	15.0167	11.1	134	2496	2.496	1992	1.992	38	67.6	756_1	756
903	15.05	11.1	134	2515	2.515	2000	2	37	68.6	756_1	756
904	15.0667	11.1	134	2535	2.535	1997	1.997	39	69.1	756_1	756
905	15.0833	11.1	135	2599	2.599	2054	2.054	39	70.5	756_1	756
907	15.1167	11.1	135	2599	2.599	2053	2.053	39	70.5	756_1	756
909	15.15	11.1	135	2633	2.633	2081	2.081	39	71	756_1	756
911	15.1833	11.1	135	2663	2.663	2108	2.108	38	71.6	756_1	756
912	15.2	11.1	135	2693	2.693	2152	2.152	38	73.3	756_1	756
914	15.2333	11.1	135	2742	2.742	2218	2.218	38	75.5	756_1	756
915	15.25	11.1	136	2692	2.692	2204	2.204	36	75.1	756_1	756
917	15.2833	11.1	136	2713	2.713	2240	2.24	35	77.2	756_1	756
919	15.3167	11.1	136	2688	2.688	2249	2.249	35	79.5	756_1	756
920	15.3333	11.1	136	2691	2.691	2260	2.26	36	80.4	756_1	756
921	15.35	11.1	137	2653	2.653	2216	2.216	38	79.6	756_1	756
923	15.3833	11.1	137	2622	2.622	2208	2.208	38	79.9	756_1	756
924	15.4	11.1	137	2631	2.631	2201	2.201	39	79.3	756_1	756
926	15.4333	11.1	138	2623	2.623	2192	2.192	39	79	756_1	756
927	15.45	11.1	138	2623	2.623	2192	2.192	39	79	756_1	756
929	15.4833	11.1	138	2639	2.639	2232	2.232	38	80.1	756_1	756
931	15.5167	11.1	139	2614	2.614	2219	2.219	36	79.5	756_1	756
932	15.5333	11.1	139	2657	2.657	2256	2.256	36	80.3	756_1	756
934	15.5667	11.1	139	2599	2.599	2191	2.191	38	78.7	756_1	756
935	15.5833	11.1	139	2599	2.599	2193	2.193	38	78.5	756_1	756
936	15.6	11.1	139	2653	2.653	2233	2.233	38	79.3	756_1	756
938	15.6333	11.1	139	2608	2.608	2138	2.138	42	74.8	756_1	756
940	15.6667	11.1	139	2514	2.514	2071	2.071	42	72.6	756_1	756
941	15.6833	11.1	139	2609	2.609	2130	2.13	44	74.2	756_1	756
943	15.7167	11.1	138	2653	2.653	2165	2.165	42	74.4	756_1	756
944	15.7333	11.1	138	2747	2.747	2242	2.242	40	76.7	756_1	756
946	15.7667	11.1	138	2747	2.747	2258	2.258	38	77.4	756_1	756
947	15.7833	11.1	138	2699	2.699	2229	2.229	38	76.5	756_1	756
949	15.8167	11.1	139	2790	2.79	2309	2.309	38	79.5	756_1	756
951	15.85	11.1	139	2864	2.864	2376	2.376	37	81.7	756_1	756
952	15.8667	11.1	139	2865	2.865	2376	2.376	37	81.7	756_1	756
954	15.9	11.1	139	2839	2.839	2383	2.383	37	83.2	756_1	756
955	15.9167	11.1	139	2849	2.849	2409	2.409	39	85.1	756_1	756
956	15.9333	11.1	140	2779	2.779	2351	2.351	43	84.7	756_1	756
957	15.95	11.1	140	2916	2.916	2472	2.472	41	87.2	756_1	756
959	15.9833	12	140	2832	2.832	2421	2.421	41	86.1	756_1	756
961	16.0167	12	140	2755	2.755	2359	2.359	45	85.8	756_1	756
962	16.0333	12	141	2646	2.646	2261	2.261	42	82	756_1	756
964	16.0667	12	141	2599	2.599	2195	2.195	44	79.7	756_1	756
965	16.0833	12	141	2607	2.607	2185	2.185	42	77.7	756_1	756
967	16.1167	12	141	2711	2.711	2274	2.274	39	78.8	756_1	756
968	16.1333	12	141	2710	2.71	2273	2.273	39	78.8	756_1	756
970	16.1667	12	141	2755	2.755	2306	2.306	38	80.3	756_1	756
971	16.1833	12	141	2821	2.821	2372	2.372	40	82.7	756_1	756
973	16.2167	12	142	2907	2.907	2441	2.441	40	84.8	756_1	756
975	16.25	12	142	2904	2.904	2515	2.515	38	89	756_1	756
977	16.2833	12	142	2905	2.905	2516	2.516	38	89	756_1	756
979	16.3167	12	142	2826	2.826	2467	2.467	38	87.5	756_1	756
980	16.3333	12	142	2794	2.794	2438	2.438	39	87.3	756_1	756
981	16.35	12	142	2755	2.755	2395	2.395	41	85.6	756_1	756
982	16.3667	12	143	2750	2.75	2378	2.378	40	84.2	756_1	756
984	16.4	12	143	2787	2.787	2320	2.32	44	80.7	756_1	756
985	16.4167	12	143	2787	2.787	2319	2.319	44	80.7	756_1	756
987	16.45	12	143	2864	2.864	2390	2.39	44	84.4	756_1	756
988	16.4667	12	143	2924	2.924	2455	2.455	44	87.1	756_1	756
990	16.5	12	143	2943	2.943	2485	2.485	42	88.4	756_1	756
991	16.5167	12	143	2987	2.987	2546	2.546	42	91.5	756_1	756
992	16.5333	12	142	2960	2.96	2544	2.544	42	92.5	756_1	756
994	16.5667	12	142	2929	2.929	2566	2.566	41	94.7	756_1	756
995	16.5833	12	139	2904	2.904	2562	2.562	40	94.8	756_1	756
997	16.6167	12	140	2858	2.858	2552	2.552	41	95.2	756_1	756
998	16.6333	12	140	2847	2.847	2559	2.559	41	95.8	756_1	756
999	16.65	12	139	2840	2.84	2551	2.551	42	96.5	756_1	756
1001	16.6833	12	138	2774	2.774	2548	2.548	38	95.2	756_1	756
1002	16.7	12	141	2806	2.806	2558	2.558	39	94.3	756_1	756
1003	16.7167	12	141	2810	2.81	2538	2.538	42	93.7	756_1	756
1005	16.75	12	143	2917	2.917	2617	2.617	43	95.4	756_1	756
1006	16.7667	12	143	3020	3.02	2654	2.654	49	97.1	756_1	756
1008	16.8	12	143	3018	3.018	2673	2.673	46	97.7	756_1	756
1009	16.8167	12	143	2962	2.962	2628	2.628	44	95.7	756_1	756
1010	16.8333	12	143	3019	3.019	2672	2.672	46	97.7	756_1	756
1012	16.8667	12	143	3074	3.074	2759	2.759	42	100.8	756_1	756
1014	16.9	12	143	3031	3.031	2744	2.744	41	99.9	756_1	756
1015	16.9167	12	143	3002	3.002	2707	2.707	42	99	756_1	756
1016	16.9333	12	143	3020	3.02	2717	2.717	42	98.8	756_1	756
1017	16.95	12	143	3050	3.05	2756	2.756	42	99.7	756_1	756
1019	16.9833	12	143	3052	3.052	2758	2.758	40	98.6	756_1	756
1021	17.0167	13	143	2979	2.979	2713	2.713	36	96.7	756_1	756
1023	17.05	13	143	2889	2.889	2620	2.62	37	93.7	756_1	756
1024	17.0667	13	143	2905	2.905	2628	2.628	38	93	756_1	756
1026	17.1	13	144	2883	2.883	2613	2.613	36	92.4	756_1	756
1027	17.1167	13	144	2883	2.883	2613	2.613	36	92.4	756_1	756
1028	17.1333	13	144	2872	2.872	2597	2.597	36	92.2	756_1	756
1029	17.15	13	144	2934	2.934	2641	2.641	39	95.1	756_1	756
1031	17.1833	13	144	2908	2.908	2623	2.623	40	96	756_1	756
1032	17.2	13	144	2937	2.937	2661	2.661	41	98.1	756_1	756
1034	17.2333	13	144	2938	2.938	2661	2.661	41	98.1	756_1	756
1035	17.25	13	144	3002	3.002	2712	2.712	45	100.7	756_1	756
1037	17.2833	13	144	2982	2.982	2731	2.731	41	101	756_1	756
1038	17.3	13	144	2975	2.975	2707	2.707	45	100.6	756_1	756
1039	17.3167	13	144	2909	2.909	2669	2.669	43	98.8	756_1	756
1040	17.3333	13	144	2957	2.957	2718	2.718	44	100	756_1	756
1041	17.35	13	144	3003	3.003	2741	2.741	47	101.6	756_1	756
1043	17.3833	13	144	3035	3.035	2787	2.787	45	103.6	756_1	756
1044	17.4	13	144	2968	2.968	2745	2.745	45	103.2	756_1	756
1046	17.4333	13	144	2890	2.89	2680	2.68	45	101	756_1	756
1046	17.4333	13	145	2922	2.922	2721	2.721	45	103	756_1	756
1048	17.4667	13	145	2923	2.923	2721	2.721	45	103	756_1	756
1050	17.5	13	145	2885	2.885	2693	2.693	45	102.2	756_1	756
1051	17.5167	13	144	2825	2.825	2636	2.636	41	98.5	756_1	756
1052	17.5333	13	144	2829	2.829	2603	2.603	44	98.1	756_1	756
1054	17.5667	13	144	2891	2.891	2673	2.673	39	98.1	756_1	756
1056	17.6	13	144	2915	2.915	2695	2.695	39	99.2	756_1	756
1057	17.6167	13	144	2915	2.915	2695	2.695	39	99.2	756_1	756
1058	17.6333	13	144	2962	2.962	2743	2.743	39	100.8	756_1	756
1059	17.65	13	145	3039	3.039	2812	2.812	43	104.8	756_1	756
1061	17.6833	13	145	3046	3.046	2829	2.829	43	104.9	756_1	756
1062	17.7	13	145	3029	3.029	2835	2.835	43	104.8	756_1	756
1063	17.7167	13	146	3002	3.002	2815	2.815	45	105.1	756_1	756
1064	17.7333	13	146	3052	3.052	2849	2.849	49	107.1	756_1	756
1066	17.7667	13	145	3000	3	2821	2.821	45	105.6	756_1	756
1067	17.7833	13	145	3044	3.044	2840	2.84	49	106.7	756_1	756
1068	17.8	13	145	2994	2.994	2832	2.832	44	105.6	756_1	756
1069	17.8167	13	145	3035	3.035	2859	2.859	49	107.6	756_1	756
1071	17.85	13	145	3024	3.024	2859	2.859	45	106.5	756_1	756
1072	17.8667	13	145	3097	3.097	2911	2.911	50	109.7	756_1	756
1074	17.9	13	145	3041	3.041	2881	2.881	45	108	756_1	756
1074	17.9	13	146	3098	3.098	2915	2.915	50	110.4	756_1	756
1076	17.9333	13	146	3054	3.054	2889	2.889	45	108.8	756_1	756
1077	17.95	13	145	3122	3.122	2912	2.912	50	110.4	756_1	756
1079	17.9833	13	146	3033	3.033	2862	2.862	45	107.2	756_1	756
1080	18	13	146	3140	3.14	2930	2.93	50	110.5	756_1	756
1081	18.0167	13	146	3068	3.068	2910	2.91	45	109.3	756_1	756
1082	18.0333	14.1	146	3135	3.135	2953	2.953	50	112.6	756_1	756
1084	18.0667	14.1	146	3032	3.032	2880	2.88	45	108.9	756_1	756
1085	18.0833	14.1	147	3102	3.102	2918	2.918	50	111.2	756_1	756
1086	18.1	14.1	147	3068	3.068	2920	2.92	45	110.3	756_1	756
1087	18.1167	14.1	147	3184	3.184	2995	2.995	50	114.2	756_1	756
1089	18.15	14.1	148	3129	3.129	2964	2.964	45	111.7	756_1	756
1090	18.1667	14.1	147	3177	3.177	2969	2.969	51	113.5	756_1	756
1091	18.1833	14.1	148	3129	3.129	2944	2.944	45	111	756_1	756
1092	18.2	14.1	148	3186	3.186	2965	2.965	50	113	756_1	756
1093	18.2167	14.1	148	3124	3.124	2931	2.931	46	111	756_1	756
1094	18.2333	14.1	148	3186	3.186	2938	2.938	51	112.9	756_1	756
1096	18.2667	14.1	148	3125	3.125	2938	2.938	46	112.3	756_1	756
1097	18.2833	14.1	148	3189	3.189	2966	2.966	51	114.5	756_1	756
1098	18.3	14.1	148	3109	3.109	2921	2.921	50	112.8	756_1	756
1099	18.3167	14.1	148	3151	3.151	2941	2.941	54	114.2	756_1	756
1100	18.3333	14.1	148	3155	3.155	2943	2.943	53	113.9	756_1	756
1102	18.3667	14.1	148	3150	3.15	2967	2.967	49	113.7	756_1	756
1103	18.3833	14.1	148	3150	3.15	2966	2.966	49	113.7	756_1	756
1104	18.4	14.1	148	3197	3.197	3020	3.02	48	115.2	756_1	756
1105	18.4167	14.1	148	3200	3.2	3026	3.026	48	115.2	756_1	756
1107	18.45	14.1	148	3220	3.22	3065	3.065	48	117.3	756_1	756
1108	18.4667	14.1	148	3242	3.242	3100	3.1	50	120.4	756_1	756
1109	18.4833	14.1	149	3168	3.168	3071	3.071	46	118.3	756_1	756
1111	18.5167	14.1	149	3182	3.182	3075	3.075	45	117.6	756_1	756
1112	18.5333	14.1	149	3210	3.21	3099	3.099	46	118	756_1	756
1113	18.55	14.1	149	3238	3.238	3092	3.092	50	118	756_1	756
1113	18.55	14.1	150	3238	3.238	3092	3.092	50	118	756_1	756
1115	18.5833	14.1	150	3249	3.249	3092	3.092	50	118	756_1	756
1116	18.6	14.1	150	3260	3.26	3085	3.085	51	117.1	756_1	756
1117	18.6167	14.1	149	3316	3.316	3142	3.142	56	121.1	756_1	756
1118	18.6333	14.1	149	3401	3.401	3187	3.187	64	124.4	756_1	756
1119	18.65	14.1	149	3290	3.29	3142	3.142	56	122.8	756_1	756
1120	18.6667	14.1	149	3285	3.285	3127	3.127	56	123.6	756_1	756
1121	18.6833	14.1	149	3261	3.261	3108	3.108	56	121.8	756_1	756
1122	18.7	14.1	149	3336	3.336	3137	3.137	63	124	756_1	756
1123	18.7167	14.1	149	3334	3.334	3149	3.149	64	125.4	756_1	756
1124	18.7333	14.1	149	3361	3.361	3175	3.175	64	128.6	756_1	756
1125	18.75	14.1	149	3327	3.327	3166	3.166	64	128.9	756_1	756
1126	18.7667	14.1	149	3338	3.338	3197	3.197	64	132.2	756_1	756
1128	18.8	14.1	149	3333	3.333	3209	3.209	64	132.1	756_1	756
1129	18.8167	14.1	149	3317	3.317	3204	3.204	64	132.6	756_1	756
1130	18.8333	14.1	149	3220	3.22	3188	3.188	56	131	756_1	756
1131	18.85	14.1	150	3220	3.22	3188	3.188	56	131	756_1	756
1132	18.8667	14.1	150	3235	3.235	3197	3.197	56	130.3	756_1	756
1133	18.8833	14.1	150	3257	3.257	3215	3.215	56	130.8	756_1	756
1134	18.9	14.1	150	3242	3.242	3198	3.198	56	129.7	756_1	756
1135	18.9167	14.1	150	3235	3.235	3171	3.171	60	129.7	756_1	756
1136	18.9333	14.1	150	3217	3.217	3129	3.129	60	128.3	756_1	756
1137	18.95	14.1	150	3322	3.322	3189	3.189	64	130.4	756_1	756
1138	18.9667	14.1	150	3317	3.317	3178	3.178	64	128.9	756_1	756
1139	18.9833	14.1	150	3177	3.177	3095	3.095	56	124.7	756_1	756
1140	19	14.1	150	3159	3.159	3065	3.065	56	124.2	756_1	756
1142	19.0333	15.1	150	3141	3.141	3075	3.075	51	122.6	756_1	756
1143	19.05	15.1	150	3201	3.201	3084	3.084	56	124.2	756_1	756
1144	19.0667	15.1	150	3230	3.23	3151	3.151	57	126.6	756_1	756
1145	19.0833	15.1	150	3230	3.23	3151	3.151	57	126.6	756_1	756
1146	19.1	15.1	150	3217	3.217	3136	3.136	56	126.3	756_1	756
1147	19.1167	15.1	151	3254	3.254	3169	3.169	57	127.5	756_1	756
1148	19.1333	15.1	151	3219	3.219	3147	3.147	57	126.6	756_1	756
1149	19.15	15.1	151	3306	3.306	3181	3.181	64	128.9	756_1	756
1150	19.1667	15.1	151	3388	3.388	3260	3.26	65	131.7	756_1	756
1151	19.1833	15.1	151	3412	3.412	3283	3.283	64	132.8	756_1	756
1152	19.2	15.1	152	3267	3.267	3195	3.195	57	127.7	756_1	756
1153	19.2167	15.1	152	3263	3.263	3190	3.19	57	126.6	756_1	756
1155	19.25	15.1	152	3175	3.175	3140	3.14	51	123.4	756_1	756
1156	19.2667	15.1	152	3299	3.299	3229	3.229	57	128.8	756_1	756
1157	19.2833	15.1	152	3325	3.325	3240	3.24	57	128.9	756_1	756
1158	19.3	15.1	152	3363	3.363	3266	3.266	57	129.2	756_1	756
1159	19.3167	15.1	152	3310	3.31	3233	3.233	51	125.8	756_1	756
1160	19.3333	15.1	152	3433	3.433	3307	3.307	57	129.7	756_1	756
1162	19.3667	15.1	153	3357	3.357	3262	3.262	51	127.4	756_1	756
1163	19.3833	15.1	153	3492	3.492	3366	3.366	57	132.1	756_1	756
1164	19.4	15.1	153	3368	3.368	3278	3.278	53	128.6	756_1	756
1165	19.4167	15.1	153	3326	3.326	3259	3.259	54	128.5	756_1	756
1166	19.4333	15.1	153	3326	3.326	3259	3.259	54	128.5	756_1	756
1167	19.45	15.1	154	3337	3.337	3263	3.263	54	128.8	756_1	756
1168	19.4667	15.1	154	3328	3.328	3252	3.252	54	128.1	756_1	756
1169	19.4833	15.1	154	3426	3.426	3341	3.341	58	131.4	756_1	756
1170	19.5	15.1	154	3428	3.428	3345	3.345	58	133.1	756_1	756
1171	19.5167	15.1	154	3429	3.429	3337	3.337	64	136.5	756_1	756
1172	19.5333	15.1	154	3461	3.461	3396	3.396	64	139.6	756_1	756
1174	19.5667	15.1	154	3352	3.352	3346	3.346	57	136.4	756_1	756
1174	19.5667	15.1	154	3389	3.389	3336	3.336	64	137.8	756_1	756
1176	19.6	15.1	154	3323	3.323	3342	3.342	57	137.1	756_1	756
1177	19.6167	15.1	154	3279	3.279	3316	3.316	57	135	756_1	756
1178	19.6333	15.1	154	3262	3.262	3299	3.299	57	134.3	756_1	756
1179	19.65	15.1	154	3340	3.34	3379	3.379	57	137	756_1	756
1180	19.6667	15.1	154	3302	3.302	3356	3.356	57	136.2	756_1	756
1181	19.6833	15.1	154	3370	3.37	3397	3.397	64	140.7	756_1	756
1182	19.7	15.1	154	3374	3.374	3429	3.429	60	141.3	756_1	756
1183	19.7167	15.1	154	3359	3.359	3421	3.421	60	143	756_1	756
1184	19.7333	15.1	154	3382	3.382	3434	3.434	64	145.5	756_1	756
1185	19.75	15.1	154	3371	3.371	3436	3.436	64	146.7	756_1	756
1186	19.7667	15.1	154	3372	3.372	3436	3.436	64	146.7	756_1	756
1187	19.7833	15.1	154	3359	3.359	3433	3.433	60	145.2	756_1	756
1188	19.8	15.1	154	3229	3.229	3341	3.341	54	139.1	756_1	756
1189	19.8167	15.1	154	3234	3.234	3324	3.324	57	139.5	756_1	756
1190	19.8333	15.1	154	3250	3.25	3330	3.33	58	138.3	756_1	756
1191	19.85	15.1	154	3246	3.246	3323	3.323	57	137.5	756_1	756
1192	19.8667	15.1	154	3250	3.25	3321	3.321	57	137.1	756_1	756
1193	19.8833	15.1	155	3240	3.24	3324	3.324	58	137.1	756_1	756
1194	19.9	15.1	155	3357	3.357	3409	3.409	65	143	756_1	756
1195	19.9167	15.1	155	3346	3.346	3428	3.428	65	145.7	756_1	756
1196	19.9333	15.1	155	3366	3.366	3466	3.466	65	147.4	756_1	756
1196	19.9333	15.1	156	3357	3.357	3485	3.485	65	148.7	756_1	756
1197	19.95	15.1	156	3367	3.367	3496	3.496	65	148.7	756_1	756
1198	19.9667	15.1	156	3349	3.349	3479	3.479	65	148.5	756_1	756
1199	19.9833	15.1	156	3296	3.296	3433	3.433	65	148.1	756_1	756
1201	20.0167	15.1	156	3273	3.273	3404	3.404	65	146.4	756_1	756
1202	20.0333	15.9	155	3277	3.277	3393	3.393	64	144	756_1	756
1203	20.05	15.9	155	3283	3.283	3393	3.393	65	143.3	756_1	756
1204	20.0667	15.9	155	3284	3.284	3376	3.376	65	142.2	756_1	756
1205	20.0833	15.9	155	3267	3.267	3340	3.34	64	141.4	756_1	756
1205	20.0833	15.9	156	3302	3.302	3386	3.386	64	141.8	756_1	756
1207	20.1167	15.9	156	3190	3.19	3303	3.303	57	136.3	756_1	756
1208	20.1333	15.9	156	3353	3.353	3419	3.419	64	142.1	756_1	756
1209	20.15	15.9	156	3383	3.383	3457	3.457	65	144.3	756_1	756
1210	20.1667	15.9	156	3395	3.395	3460	3.46	64	144.3	756_1	756
1211	20.1833	15.9	157	3296	3.296	3388	3.388	57	139.7	756_1	756
1212	20.2	15.9	157	3327	3.327	3400	3.4	58	138.6	756_1	756
1213	20.2167	15.9	156	3346	3.346	3400	3.4	57	138.5	756_1	756
1214	20.2333	15.9	156	3456	3.456	3488	3.488	64	144.1	756_1	756
1215	20.25	15.9	156	3424	3.424	3475	3.475	64	144.9	756_1	756
1216	20.2667	15.9	156	3390	3.39	3453	3.453	64	144.1	756_1	756
1217	20.2833	15.9	156	3424	3.424	3457	3.457	64	144.3	756_1	756
1218	20.3	15.9	156	3445	3.445	3518	3.518	64	148.2	756_1	756
1219	20.3167	15.9	156	3446	3.446	3518	3.518	64	148.2	756_1	756
1220	20.3333	15.9	156	3346	3.346	3444	3.444	63	145.6	756_1	756
1221	20.35	15.9	156	3361	3.361	3450	3.45	64	144.7	756_1	756
1222	20.3667	15.9	156	3379	3.379	3479	3.479	64	146	756_1	756
1223	20.3833	15.9	156	3369	3.369	3483	3.483	64	146.8	756_1	756
1224	20.4	15.9	156	3281	3.281	3382	3.382	64	142.3	756_1	756
1225	20.4167	15.9	157	3281	3.281	3382	3.382	64	142.3	756_1	756
1226	20.4333	15.9	157	3336	3.336	3450	3.45	65	145	756_1	756
1227	20.45	15.9	157	3397	3.397	3516	3.516	65	147.6	756_1	756
1228	20.4667	15.9	157	3390	3.39	3531	3.531	65	149.4	756_1	756
1229	20.4833	15.9	156	3377	3.377	3520	3.52	66	150.2	756_1	756
1229	20.4833	15.9	156	3393	3.393	3544	3.544	65	151.7	756_1	756
1230	20.5	15.9	156	3394	3.394	3556	3.556	65	153.4	756_1	756
1231	20.5167	15.9	156	3375	3.375	3542	3.542	65	152.6	756_1	756
1233	20.55	15.9	155	3366	3.366	3543	3.543	65	152.6	756_1	756
1234	20.5667	15.9	156	3328	3.328	3496	3.496	65	150.2	756_1	756
1235	20.5833	15.9	157	3304	3.304	3460	3.46	65	147.9	756_1	756
1236	20.6	15.9	157	3326	3.326	3503	3.503	65	148.7	756_1	756
1237	20.6167	15.9	157	3318	3.318	3470	3.47	65	147.5	756_1	756
1237	20.6167	15.9	157	3319	3.319	3460	3.46	65	145.4	756_1	756
1238	20.6333	15.9	157	3322	3.322	3457	3.457	66	146.2	756_1	756
1239	20.65	15.9	157	3341	3.341	3502	3.502	66	149.7	756_1	756
1240	20.6667	15.9	157	3335	3.335	3521	3.521	66	151	756_1	756
1241	20.6833	15.9	157	3335	3.335	3522	3.522	66	151	756_1	756
1242	20.7	15.9	157	3335	3.335	3522	3.522	66	151	756_1	756
1243	20.7167	15.9	157	3317	3.317	3530	3.53	65	151.1	756_1	756
1244	20.7333	15.9	157	3301	3.301	3529	3.529	65	153.1	756_1	756
1245	20.75	15.9	157	3310	3.31	3545	3.545	65	153.7	756_1	756
1246	20.7667	15.9	157	3295	3.295	3543	3.543	65	153.3	756_1	756
1247	20.7833	15.9	157	3268	3.268	3485	3.485	66	150.4	756_1	756
1248	20.8	15.9	157	3277	3.277	3483	3.483	66	149.4	756_1	756
1249	20.8167	15.9	157	3282	3.282	3462	3.462	66	147.3	756_1	756
1250	20.8333	15.9	157	3293	3.293	3476	3.476	66	148.1	756_1	756
1251	20.85	15.9	157	3294	3.294	3467	3.467	66	146.7	756_1	756
1252	20.8667	15.9	157	3274	3.274	3438	3.438	66	145.5	756_1	756
1252	20.8667	15.9	157	3302	3.302	3503	3.503	65	148.7	756_1	756
1253	20.8833	15.9	157	3319	3.319	3514	3.514	65	149.8	756_1	756
1254	20.9	15.9	157	3320	3.32	3515	3.515	65	149.8	756_1	756
1255	20.9167	15.9	157	3299	3.299	3509	3.509	66	150.2	756_1	756
1256	20.9333	15.9	157	3276	3.276	3492	3.492	66	149.8	756_1	756
1257	20.95	15.9	157	3276	3.276	3489	3.489	65	149.1	756_1	756
1258	20.9667	15.9	157	3285	3.285	3506	3.506	66	149.4	756_1	756
1259	20.9833	15.9	157	3285	3.285	3505	3.505	65	149.5	756_1	756
1260	21	15.9	157	3265	3.265	3463	3.463	65	148.6	756_1	756
1261	21.0167	15.9	157	3260	3.26	3475	3.475	65	150.2	756_1	756
1262	21.0333	17	157	3248	3.248	3473	3.473	66	151.1	756_1	756
1263	21.05	17	156	3260	3.26	3497	3.497	66	151.7	756_1	756
1263	21.05	17	157	3271	3.271	3513	3.513	66	153.2	756_1	756
1264	21.0667	17	156	3265	3.265	3502	3.502	66	153.9	756_1	756
1265	21.0833	17	155	3252	3.252	3474	3.474	67	153.1	756_1	756
1266	21.1	17	156	3268	3.268	3496	3.496	67	153.4	756_1	756
1267	21.1167	17	156	3286	3.286	3497	3.497	67	152.8	756_1	756
1268	21.1333	17	157	3306	3.306	3537	3.537	66	154.8	756_1	756
1269	21.15	17	157	3304	3.304	3521	3.521	66	154	756_1	756
1270	21.1667	17	157	3287	3.287	3519	3.519	66	153.1	756_1	756
1271	21.1833	17	157	3269	3.269	3501	3.501	66	152.2	756_1	756
1272	21.2	17	157	3269	3.269	3501	3.501	66	152.2	756_1	756
1273	21.2167	17	157	3248	3.248	3488	3.488	66	152.3	756_1	756
1273	21.2167	17	157	3221	3.221	3476	3.476	66	152.4	756_1	756
1274	21.2333	17	157	3193	3.193	3446	3.446	66	151.1	756_1	756
1275	21.25	17	157	3187	3.187	3450	3.45	66	150.7	756_1	756
1276	21.2667	17	157	3199	3.199	3454	3.454	66	149.6	756_1	756
1277	21.2833	17	157	3198	3.198	3451	3.451	66	148.6	756_1	756
1278	21.3	17	157	3204	3.204	3458	3.458	66	149.7	756_1	756
1279	21.3167	17	158	3209	3.209	3470	3.47	66	150.7	756_1	756
1280	21.3333	17	158	3202	3.202	3468	3.468	66	149.5	756_1	756
1281	21.35	17	157	3220	3.22	3493	3.493	65	150.8	756_1	756
1282	21.3667	17	157	3229	3.229	3495	3.495	66	151.5	756_1	756
1282	21.3667	17	157	3204	3.204	3477	3.477	66	152.1	756_1	756
1284	21.4	17	157	3156	3.156	3411	3.411	67	151.7	756_1	756
1286	21.4333	17	156	2987	2.987	3219	3.219	65	141.4	756_1	756
1288	21.4667	17	155	2917	2.917	3112	3.112	56	126.7	756_1	756
1289	21.4833	17	155	2916	2.916	3083	3.083	53	120.5	756_1	756
1290	21.5	4.9	153	2835	2.835	2982	2.982	49	112.7	756_1	756
1292	21.5333	4.9	152	2815	2.815	2962	2.962	45	108.2	756_1	756
1293	21.55	4.9	151	2766	2.766	2923	2.923	45	107.3	756_1	756
1294	21.5667	4.9	150	2871	2.871	3019	3.019	43	108.7	756_1	756
1295	21.5833	4.9	149	2874	2.874	3036	3.036	45	112.4	756_1	756
1297	21.6167	4.9	148	2882	2.882	3064	3.064	46	114.3	756_1	756
1298	21.6333	4.9	148	2853	2.853	3064	3.064	46	114.7	756_1	756
1299	21.65	4.9	147	2871	2.871	3097	3.097	46	115.5	756_1	756
1301	21.6833	4.9	147	2872	2.872	3097	3.097	46	115.2	756_1	756
1302	21.7	4.9	146	2854	2.854	3076	3.076	45	113.1	756_1	756
1304	21.7333	4.9	146	2829	2.829	3026	3.026	43	109	756_1	756
1305	21.75	4.9	145	2828	2.828	3026	3.026	43	109	756_1	756
1306	21.7667	4.9	144	2880	2.88	3062	3.062	43	108.7	756_1	756
1308	21.8	4.9	142	2923	2.923	3090	3.09	43	109.4	756_1	756
1309	21.8167	4.9	141	2953	2.953	3108	3.108	42	110	756_1	756
1310	21.8333	4.9	140	3009	3.009	3193	3.193	44	113.1	756_1	756
1312	21.8667	4.9	139	3024	3.024	3245	3.245	45	116.9	756_1	756
1313	21.8833	4.9	139	3025	3.025	3246	3.246	45	116.9	756_1	756
1315	21.9167	4.9	138	2927	2.927	3171	3.171	45	115	756_1	756
1316	21.9333	4.9	137	2910	2.91	3190	3.19	45	116.1	756_1	756
1317	21.95	4.9	137	2878	2.878	3164	3.164	45	115.2	756_1	756
1319	21.9833	4.9	136	2805	2.805	3132	3.132	45	114.5	756_1	756
1320	22	4.9	135	2712	2.712	3056	3.056	45	113.3	756_1	756
1321	22.0167	4.9	134	2631	2.631	3003	3.003	45	111.7	756_1	756
1323	22.05	4.9	133	2607	2.607	3008	3.008	45	111	756_1	756
1324	22.0667	4.9	133	2616	2.616	3027	3.027	46	111.9	756_1	756
1325	22.0833	4.9	132	2563	2.563	2991	2.991	46	111.8	756_1	756
1327	22.1167	4.9	131	2518	2.518	2952	2.952	45	110.6	756_1	756
1328	22.1333	4.9	130	2488	2.488	2925	2.925	45	109.9	756_1	756
1330	22.1667	4.9	130	2344	2.344	2763	2.763	42	99.9	756_1	756
1332	22.2	4.9	129	2381	2.381	2809	2.809	42	99.7	756_1	756
1333	22.2167	4.9	128	2378	2.378	2803	2.803	42	100.4	756_1	756
1335	22.25	4.9	127	2211	2.211	2607	2.607	39	90.9	756_1	756
1336	22.2667	4.9	126	2185	2.185	2592	2.592	39	91.3	756_1	756
1338	22.3	4.9	126	2159	2.159	2578	2.578	38	90.9	756_1	756
1339	22.3167	4.9	125	2281	2.281	2741	2.741	41	100.4	756_1	756
1341	22.35	4.9	124	2262	2.262	2776	2.776	42	106.9	756_1	756
1342	22.3667	4.9	124	2210	2.21	2745	2.745	42	107.2	756_1	756
1343	22.3833	4.9	124	2100	2.1	2655	2.655	42	106.5	756_1	756
1345	22.4167	4.9	124	2136	2.136	2697	2.697	44	108.7	756_1	756
1346	22.4333	4.9	124	2070	2.07	2648	2.648	44	107.2	756_1	756
1347	22.45	4.9	123	1983	1.983	2562	2.562	43	104.5	756_1	756
1349	22.4833	4.9	123	1926	1.926	2520	2.52	43	102.2	756_1	756
1350	22.5	4.9	123	1933	1.933	2518	2.518	45	102.3	756_1	756
1351	22.5167	4.9	122	1886	1.886	2463	2.463	45	100.1	756_1	756
1353	22.55	4.9	121	1848	1.848	2417	2.417	45	97.5	756_1	756
1354	22.5667	4.9	121	1844	1.844	2386	2.386	45	96.4	756_1	756
1355	22.5833	4.9	120	1844	1.844	2386	2.386	45	96.4	756_1	756
1358	22.6333	4.9	119	1831	1.831	2362	2.362	46	95.6	756_1	756
1359	22.65	4.9	119	1842	1.842	2341	2.341	46	95.5	756_1	756
1361	22.6833	4.9	117	1873	1.873	2366	2.366	46	95.2	756_1	756
1362	22.7	4.9	116	1916	1.916	2403	2.403	46	96	756_1	756
1364	22.7333	4.9	115	1922	1.922	2392	2.392	45	95.4	756_1	756
1365	22.75	4.9	114	1885	1.885	2366	2.366	44	94.2	756_1	756
1366	22.7667	4.9	113	1857	1.857	2345	2.345	42	93.7	756_1	756
1368	22.8	4.9	113	1857	1.857	2345	2.345	42	93.7	756_1	756
1369	22.8167	4.9	112	1790	1.79	2279	2.279	42	93	756_1	756
1371	22.85	4.9	112	1714	1.714	2208	2.208	41	92.1	756_1	756
1372	22.8667	4.9	112	1663	1.663	2147	2.147	41	89.9	756_1	756
1374	22.9	4.9	111	1628	1.628	2119	2.119	42	89.5	756_1	756
1375	22.9167	4.9	111	1603	1.603	2086	2.086	42	89.1	756_1	756
1376	22.9333	4.9	111	1579	1.579	2053	2.053	43	87.9	756_1	756
1378	22.9667	4.9	111	1564	1.564	2032	2.032	42	87.3	756_1	756
1379	22.9833	4.9	110	1540	1.54	2007	2.007	43	86.2	756_1	756
1381	23.0167	4.9	110	1531	1.531	2003	2.003	43	85.4	756_1	756
1383	23.05	4.9	109	1520	1.52	1985	1.985	43	84.3	756_1	756
1385	23.0833	4.9	109	1363	1.363	1760	1.76	39	73	756_1	756
1387	23.1167	4.9	108	1363	1.363	1759	1.759	39	73	756_1	756
1388	23.1333	4.9	107	1388	1.388	1744	1.744	38	70.9	756_1	756
1390	23.1667	4.9	107	1427	1.427	1753	1.753	37	70	756_1	756
1392	23.2	4.9	106	1467	1.467	1772	1.772	35	70.5	756_1	756
1393	23.2167	4.9	105	1462	1.462	1746	1.746	34	69.4	756_1	756
1395	23.25	4.9	104	1600	1.6	1906	1.906	37	77.2	756_1	756
1396	23.2667	4.9	104	1600	1.6	1907	1.907	37	77.2	756_1	756
1398	23.3	4.9	104	1565	1.565	1860	1.86	39	75.5	756_1	756
1399	23.3167	4.9	104	1505	1.505	1798	1.798	39	74.6	756_1	756
1401	23.35	4.9	104	1465	1.465	1754	1.754	41	73.5	756_1	756
1402	23.3667	4.9	103	1463	1.463	1747	1.747	41	73.5	756_1	756
1404	23.4	4.9	103	1461	1.461	1740	1.74	42	73.5	756_1	756
1405	23.4167	4.9	103	1423	1.423	1702	1.702	41	71.9	756_1	756
1406	23.4333	4.9	103	1438	1.438	1718	1.718	41	72.2	756_1	756
1408	23.4667	4.9	102	1441	1.441	1711	1.711	41	72.2	756_1	756
1409	23.4833	4.9	102	1469	1.469	1727	1.727	42	73.3	756_1	756
1411	23.5167	4.9	102	1462	1.462	1707	1.707	43	73.5	756_1	756
1412	23.5333	4.9	102	1424	1.424	1674	1.674	43	72.2	756_1	756
1416	23.6	4.9	102	1360	1.36	1604	1.604	42	69.5	756_1	756
1417	23.6167	4.9	102	1398	1.398	1637	1.637	42	70.8	756_1	756
1419	23.65	4.9	102	1446	1.446	1662	1.662	41	69.8	756_1	756
1420	23.6667	4.9	102	1470	1.47	1656	1.656	41	68.8	756_1	756
1422	23.7	4.9	101	1540	1.54	1708	1.708	41	68.3	756_1	756
1424	23.7333	4.9	101	1497	1.497	1668	1.668	37	65.5	756_1	756
1425	23.75	4.9	101	1519	1.519	1663	1.663	37	65.7	756_1	756
1427	23.7833	4.9	100	1583	1.583	1737	1.737	37	67.9	756_1	756
1428	23.8	4.9	100	1525	1.525	1690	1.69	37	68.2	756_1	756
1430	23.8333	4.9	100	1504	1.504	1678	1.678	38	69.4	756_1	756
1431	23.85	4.9	100	1466	1.466	1655	1.655	38	69.5	756_1	756
1433	23.8833	4.9	100	1466	1.466	1655	1.655	38	69.5	756_1	756
1434	23.9	4.9	100	1520	1.52	1702	1.702	43	73.1	756_1	756
1435	23.9167	4.9	100	1520	1.52	1702	1.702	43	73.1	756_1	756
1437	23.95	4.9	99	1462	1.462	1655	1.655	42	71.9	756_1	756
1438	23.9667	4.9	99	1442	1.442	1635	1.635	43	71	756_1	756
1440	24	4.9	99	1400	1.4	1607	1.607	41	69.2	756_1	756
1441	24.0167	4.9	99	1380	1.38	1584	1.584	41	68	756_1	756
1445	24.0833	4.9	99	1322	1.322	1521	1.521	41	65.3	756_1	756
1447	24.1167	4.9	99	1323	1.323	1521	1.521	41	65.3	756_1	756
1448	24.1333	4.9	99	1373	1.373	1535	1.535	41	64.9	756_1	756
1449	24.15	4.9	98	1417	1.417	1561	1.561	40	65.7	756_1	756
1451	24.1833	4.9	98	1429	1.429	1556	1.556	40	65.3	756_1	756
1453	24.2167	4.9	97	1470	1.47	1593	1.593	37	67.6	756_1	756
1454	24.2333	4.9	97	1470	1.47	1578	1.578	38	67.2	756_1	756
1456	24.2667	4.9	97	1470	1.47	1578	1.578	38	67.2	756_1	756
1457	24.2833	4.9	97	1423	1.423	1500	1.5	43	63.5	756_1	756
1459	24.3167	4.9	96	1376	1.376	1469	1.469	43	62.6	756_1	756
1460	24.3333	4.9	96	1334	1.334	1426	1.426	44	60.9	756_1	756
1462	24.3667	4.9	96	1330	1.33	1419	1.419	43	60.5	756_1	756
1463	24.3833	4.9	96	1300	1.3	1394	1.394	43	59.6	756_1	756
1465	24.4167	4.9	96	1335	1.335	1424	1.424	42	60.3	756_1	756
1466	24.4333	4.9	96	1332	1.332	1428	1.428	40	60.3	756_1	756
1468	24.4667	4.9	96	1328	1.328	1415	1.415	40	60	756_1	756
1469	24.4833	4.9	96	1309	1.309	1389	1.389	40	59.1	756_1	756
