# Supplementary material for: On the development of diagnostic support algorithms based on CPET biosignals data via machine learning and wavelets
Source: PeerJ journal article supplement (doi:10.7717/peerj-cs.2474), 2025-01-30
Supplement: raw_data.zip [file Subject_36.xlsx]

## Sheet: Folha1
time	time	Speed	HR	VO2	VO2	VCO2	VCO2	RR	VE	ID_test	ID
	min	km/h	/min	ml/min	L/min	ml/min	L/min	/min	L/min
0	0	0		694	0.694	605	0.605	9	18.2	377_1	377
7	0.116667	0	87	513	0.513	427	0.427	8	12.3	377_1	377
10	0.166667	0	71	512	0.512	426	0.426	8	12.3	377_1	377
15	0.25	0	71	599	0.599	512	0.512	8	15.1	377_1	377
17	0.283333	0	89	693	0.693	578	0.578	9	17	377_1	377
20	0.333333	0	89	735	0.735	609	0.609	11	18.4	377_1	377
23	0.383333	0	89	754	0.754	628	0.628	12	19.5	377_1	377
26	0.433333	0	88	780	0.78	638	0.638	14	20.6	377_1	377
28	0.466667	0	88	917	0.917	748	0.748	19	25.2	377_1	377
31	0.516667	0	88	924	0.924	756	0.756	18	24.9	377_1	377
35	0.583333	0	88	898	0.898	742	0.742	19	25.4	377_1	377
38	0.633333	0	88	889	0.889	732	0.732	20	25.2	377_1	377
40	0.666667	0	88	884	0.884	726	0.726	20	25	377_1	377
43	0.716667	0	88	897	0.897	723	0.723	20	24.9	377_1	377
46	0.766667	5	89	910	0.91	724	0.724	21	25.3	377_1	377
49	0.816667	5	89	935	0.935	737	0.737	20	25.2	377_1	377
52	0.866667	5	89	948	0.948	737	0.737	20	25	377_1	377
56	0.933333	5	89	948	0.948	737	0.737	20	25	377_1	377
58	0.966667	5	89	950	0.95	735	0.735	20	24.6	377_1	377
61	1.01667	5	89	963	0.963	741	0.741	20	24.3	377_1	377
64	1.06667	5	88	958	0.958	738	0.738	20	24.2	377_1	377
67	1.11667	5	88	980	0.98	750	0.75	20	24.1	377_1	377
72	1.2	5	88	1005	1.005	763	0.763	20	24.5	377_1	377
74	1.23333	5	88	1000	1	769	0.769	22	25.4	377_1	377
77	1.28333	5	88	1023	1.023	785	0.785	22	25.7	377_1	377
80	1.33333	5	87	1001	1.001	781	0.781	22	26.2	377_1	377
82	1.36667	5	88	993	0.993	782	0.782	22	26.4	377_1	377
85	1.41667	5	88	966	0.966	770	0.77	23	26.6	377_1	377
88	1.46667	5	88	951	0.951	765	0.765	22	26.5	377_1	377
91	1.51667	5	88	950	0.95	765	0.765	22	26.5	377_1	377
94	1.56667	5	88	986	0.986	784	0.784	22	26.6	377_1	377
99	1.65	5	89	1006	1.006	793	0.793	21	26.4	377_1	377
102	1.7	5	89	998	0.998	782	0.782	22	26	377_1	377
104	1.73333	5	89	1007	1.007	787	0.787	22	26.4	377_1	377
108	1.8	5	89	1050	1.05	826	0.826	21	26.9	377_1	377
110	1.83333	5	90	1040	1.04	817	0.817	21	26.8	377_1	377
113	1.88333	5	90	1020	1.02	801	0.801	21	26.6	377_1	377
116	1.93333	5	90	1006	1.006	792	0.792	21	26.4	377_1	377
122	2.03333	5	90	1006	1.006	792	0.792	21	26.4	377_1	377
125	2.08333	5	89	1006	1.006	792	0.792	21	26.4	377_1	377
129	2.15	5	90	971	0.971	776	0.776	20	25.6	377_1	377
135	2.25	5	89	974	0.974	789	0.789	16	24.4	377_1	377
138	2.3	5	89	967	0.967	786	0.786	17	24.1	377_1	377
140	2.33333	5	89	967	0.967	787	0.787	17	24	377_1	377
143	2.38333	5	89	975	0.975	792	0.792	17	24	377_1	377
146	2.43333	5	90	970	0.97	790	0.79	17	24	377_1	377
148	2.46667	5	90	1001	1.001	805	0.805	18	24.5	377_1	377
153	2.55	5	90	1015	1.015	801	0.801	22	26.5	377_1	377
156	2.6	5	90	1020	1.02	811	0.811	22	27.3	377_1	377
158	2.63333	5	90	1020	1.02	811	0.811	22	27.3	377_1	377
160	2.66667	5	90	1035	1.035	827	0.827	22	27.9	377_1	377
163	2.71667	5	90	1029	1.029	832	0.832	22	28	377_1	377
166	2.76667	5	89	1023	1.023	833	0.833	22	27.9	377_1	377
169	2.81667	5	89	1000	1	820	0.82	22	27.6	377_1	377
174	2.9	5	89	1001	1.001	820	0.82	22	27.6	377_1	377
177	2.95	5	88	977	0.977	798	0.798	22	27.2	377_1	377
180	3	5	88	978	0.978	807	0.807	22	27.1	377_1	377
182	3.03333	5	88	947	0.947	786	0.786	21	26.5	377_1	377
185	3.08333	5	88	934	0.934	778	0.778	22	26.3	377_1	377
188	3.13333	5	88	935	0.935	779	0.779	22	26.5	377_1	377
190	3.16667	5	88	930	0.93	775	0.775	22	26.5	377_1	377
193	3.21667	5	88	930	0.93	775	0.775	22	26.5	377_1	377
196	3.26667	5	89	960	0.96	797	0.797	22	27	377_1	377
199	3.31667	5	89	960	0.96	798	0.798	22	27	377_1	377
201	3.35	5	89	990	0.99	816	0.816	23	27.3	377_1	377
204	3.4	5	90	1010	1.01	833	0.833	23	27.4	377_1	377
207	3.45	5	90	1006	1.006	834	0.834	23	27.2	377_1	377
210	3.5	5	91	1014	1.014	849	0.849	22	27.4	377_1	377
213	3.55	5	91	1005	1.005	853	0.853	22	27.5	377_1	377
219	3.65	5	91	1013	1.013	853	0.853	22	27.4	377_1	377
221	3.68333	5	90	1013	1.013	853	0.853	22	27.4	377_1	377
224	3.73333	5	89	964	0.964	826	0.826	22	26.9	377_1	377
226	3.76667	5	88	938	0.938	809	0.809	23	27	377_1	377
229	3.81667	5	88	933	0.933	811	0.811	23	27.5	377_1	377
231	3.85	5	88	920	0.92	800	0.8	24	27.7	377_1	377
233	3.88333	5	88	902	0.902	783	0.783	25	27.9	377_1	377
236	3.93333	5	89	907	0.907	787	0.787	25	27.6	377_1	377
238	3.96667	5	89	941	0.941	812	0.812	25	28.7	377_1	377
241	4.01667	5	90	940	0.94	811	0.811	25	28.7	377_1	377
243	4.05	5	90	956	0.956	824	0.824	25	29	377_1	377
246	4.1	5	90	984	0.984	847	0.847	24	29	377_1	377
249	4.15	5	90	960	0.96	826	0.826	24	28.4	377_1	377
251	4.18333	5	90	960	0.96	825	0.825	23	28.1	377_1	377
254	4.23333	5	91	973	0.973	831	0.831	23	28.4	377_1	377
257	4.28333	5	91	974	0.974	835	0.835	23	28.3	377_1	377
261	4.35	5	91	1017	1.017	894	0.894	20	28.7	377_1	377
264	4.4	5	90	999	0.999	885	0.885	19	28.3	377_1	377
266	4.43333	5	90	974	0.974	865	0.865	20	28	377_1	377
269	4.48333	5	90	974	0.974	865	0.865	20	28	377_1	377
271	4.51667	5	90	991	0.991	877	0.877	20	28.3	377_1	377
274	4.56667	5	90	998	0.998	888	0.888	20	28.7	377_1	377
276	4.6	5	90	1010	1.01	905	0.905	20	29.2	377_1	377
279	4.65	5	90	999	0.999	884	0.884	24	29.8	377_1	377
281	4.68333	5	91	1023	1.023	903	0.903	24	30.5	377_1	377
284	4.73333	5	91	1023	1.023	904	0.904	24	31	377_1	377
286	4.76667	5	91	1036	1.036	917	0.917	24	31	377_1	377
289	4.81667	5	91	1003	1.003	892	0.892	24	30.5	377_1	377
291	4.85	5	91	971	0.971	862	0.862	25	29.9	377_1	377
293	4.88333	5	92	971	0.971	861	0.861	25	29.9	377_1	377
296	4.93333	5	92	981	0.981	865	0.865	25	30	377_1	377
299	4.98333	5	92	982	0.982	863	0.863	25	29.8	377_1	377
301	5.01667	5	92	988	0.988	867	0.867	24	29.7	377_1	377
303	5.05	5	92	953	0.953	838	0.838	24	28.7	377_1	377
306	5.1	5	92	987	0.987	862	0.862	25	29.5	377_1	377
308	5.13333	5	92	1015	1.015	885	0.885	24	29.8	377_1	377
311	5.18333	5	92	1012	1.012	888	0.888	24	30.1	377_1	377
313	5.21667	5	92	995	0.995	876	0.876	25	30.1	377_1	377
315	5.25	5	92	980	0.98	870	0.87	25	30.2	377_1	377
318	5.3	5	92	993	0.993	888	0.888	26	30.8	377_1	377
320	5.33333	5	92	989	0.989	894	0.894	25	31.2	377_1	377
323	5.38333	5	92	990	0.99	895	0.895	25	31.2	377_1	377
325	5.41667	5	92	960	0.96	871	0.871	25	30.6	377_1	377
329	5.48333	5	92	960	0.96	871	0.871	25	30.6	377_1	377
331	5.51667	5	92	949	0.949	864	0.864	25	30.2	377_1	377
334	5.56667	5	92	916	0.916	836	0.836	25	28.9	377_1	377
337	5.61667	5	92	882	0.882	800	0.8	25	27.6	377_1	377
339	5.65	5	92	872	0.872	784	0.784	25	26.8	377_1	377
341	5.68333	5	91	900	0.9	805	0.805	24	26.8	377_1	377
344	5.73333	5	91	893	0.893	790	0.79	24	26.3	377_1	377
346	5.76667	5	91	893	0.893	790	0.79	24	26.3	377_1	377
349	5.81667	5	91	946	0.946	830	0.83	25	27.9	377_1	377
352	5.86667	5	91	976	0.976	870	0.87	23	28.5	377_1	377
355	5.91667	5	91	978	0.978	878	0.878	23	28.8	377_1	377
357	5.95	5	91	978	0.978	878	0.878	23	28.8	377_1	377
361	6.01667	5	92	990	0.99	897	0.897	21	29.1	377_1	377
363	6.05	5	92	1010	1.01	924	0.924	21	30	377_1	377
367	6.11667	5	93	997	0.997	922	0.922	20	29.4	377_1	377
371	6.18333	5	93	953	0.953	878	0.878	21	28.5	377_1	377
376	6.26667	5	93	978	0.978	910	0.91	19	28.7	377_1	377
380	6.33333	5	93	965	0.965	902	0.902	17	28	377_1	377
382	6.36667	5	92	956	0.956	897	0.897	18	27.9	377_1	377
384	6.4	5	91	931	0.931	872	0.872	18	27	377_1	377
387	6.45	5	91	865	0.865	797	0.797	22	25.9	377_1	377
389	6.48333	5	90	852	0.852	777	0.777	23	25.5	377_1	377
391	6.51667	5	90	923	0.923	859	0.859	19	26.7	377_1	377
393	6.55	5	90	918	0.918	834	0.834	23	27.3	377_1	377
396	6.6	5	90	967	0.967	869	0.869	26	29.5	377_1	377
398	6.63333	5	90	1038	1.038	935	0.935	27	32.1	377_1	377
400	6.66667	5	90	1074	1.074	978	0.978	26	33.5	377_1	377
403	6.71667	5	90	1070	1.07	983	0.983	26	34	377_1	377
405	6.75	5	90	1082	1.082	992	0.992	26	34.3	377_1	377
407	6.78333	5	91	1043	1.043	969	0.969	26	33.4	377_1	377
410	6.83333	5	91	1027	1.027	953	0.953	25	32.6	377_1	377
412	6.86667	5	91	1009	1.009	944	0.944	25	32.3	377_1	377
414	6.9	5	92	984	0.984	921	0.921	24	31.6	377_1	377
417	6.95	5	92	948	0.948	886	0.886	25	30.5	377_1	377
421	7.01667	5	92	958	0.958	894	0.894	22	29.4	377_1	377
423	7.05	5	92	947	0.947	883	0.883	22	28.3	377_1	377
426	7.1	5	92	913	0.913	850	0.85	22	27.4	377_1	377
428	7.13333	5	92	906	0.906	838	0.838	22	26.9	377_1	377
431	7.18333	5	92	905	0.905	837	0.837	22	26.9	377_1	377
433	7.21667	5	92	922	0.922	857	0.857	22	27.3	377_1	377
436	7.26667	5	92	937	0.937	872	0.872	21	27.9	377_1	377
440	7.33333	5	92	918	0.918	857	0.857	21	27.7	377_1	377
442	7.36667	5	92	900	0.9	841	0.841	21	27.5	377_1	377
445	7.41667	5	91	908	0.908	847	0.847	21	27.6	377_1	377
448	7.46667	5	91	905	0.905	840	0.84	21	27.1	377_1	377
450	7.5	5	91	881	0.881	812	0.812	21	26.2	377_1	377
454	7.56667	5	91	881	0.881	812	0.812	21	26.2	377_1	377
456	7.6	5	91	865	0.865	793	0.793	22	25.5	377_1	377
460	7.66667	5	91	848	0.848	766	0.766	23	25	377_1	377
463	7.71667	5	92	862	0.862	772	0.772	23	24.7	377_1	377
465	7.75	5	92	884	0.884	783	0.783	23	24.8	377_1	377
468	7.8	5	92	876	0.876	771	0.771	23	24.4	377_1	377
471	7.85	5	92	900	0.9	791	0.791	23	24.9	377_1	377
474	7.9	5	93	901	0.901	791	0.791	23	24.9	377_1	377
477	7.95	5	93	908	0.908	798	0.798	23	25.2	377_1	377
480	8	5	93	910	0.91	811	0.811	23	25.7	377_1	377
482	8.03333	5	93	911	0.911	811	0.811	23	25.7	377_1	377
487	8.11667	5	93	910	0.91	825	0.825	21	26	377_1	377
490	8.16667	5	93	882	0.882	830	0.83	21	26.3	377_1	377
492	8.2	5	92	857	0.857	812	0.812	21	25.9	377_1	377
495	8.25	5	92	838	0.838	794	0.794	22	25.8	377_1	377
498	8.3	5	92	853	0.853	812	0.812	22	26.4	377_1	377
501	8.35	5	92	880	0.88	840	0.84	22	27.4	377_1	377
504	8.4	5	92	896	0.896	855	0.855	22	27.9	377_1	377
506	8.43333	5	92	879	0.879	832	0.832	22	27.4	377_1	377
510	8.5	5	92	933	0.933	866	0.866	22	28.4	377_1	377
514	8.56667	5	92	938	0.938	873	0.873	21	28.1	377_1	377
517	8.61667	5	92	962	0.962	892	0.892	21	28.6	377_1	377
520	8.66667	5	92	965	0.965	900	0.9	20	28.6	377_1	377
523	8.71667	5	92	947	0.947	881	0.881	20	27.6	377_1	377
527	8.78333	5	92	964	0.964	907	0.907	18	27.9	377_1	377
529	8.81667	5	92	961	0.961	906	0.906	19	27.9	377_1	377
532	8.86667	5	93	939	0.939	884	0.884	19	27.6	377_1	377
535	8.91667	6	93	911	0.911	855	0.855	20	27.4	377_1	377
537	8.95	6	94	862	0.862	798	0.798	22	26.1	377_1	377
540	9	6	94	869	0.869	809	0.809	21	26.3	377_1	377
543	9.05	6	94	912	0.912	845	0.845	21	27.2	377_1	377
545	9.08333	6	94	902	0.902	820	0.82	24	27	377_1	377
547	9.11667	6	94	883	0.883	798	0.798	23	26.3	377_1	377
550	9.16667	6	94	898	0.898	810	0.81	23	27.1	377_1	377
553	9.21667	6	95	965	0.965	866	0.866	24	28.4	377_1	377
557	9.28333	6	96	1000	1	910	0.91	21	29	377_1	377
560	9.33333	6	97	987	0.987	902	0.902	21	28.5	377_1	377
562	9.36667	6	98	978	0.978	891	0.891	21	28.1	377_1	377
565	9.41667	6	99	976	0.976	888	0.888	20	27.7	377_1	377
568	9.46667	6	100	987	0.987	893	0.893	20	27.5	377_1	377
571	9.51667	6	100	973	0.973	881	0.881	19	27	377_1	377
574	9.56667	6	101	973	0.973	881	0.881	19	27	377_1	377
579	9.65	6	101	987	0.987	879	0.879	21	26.7	377_1	377
582	9.7	6	101	1000	1	892	0.892	20	27	377_1	377
584	9.73333	6	101	1026	1.026	913	0.913	20	27.6	377_1	377
587	9.78333	6	101	1057	1.057	933	0.933	21	28.4	377_1	377
590	9.83333	6	101	1079	1.079	951	0.951	21	28.8	377_1	377
594	9.9	7	102	1168	1.168	1018	1.018	20	29.8	377_1	377
597	9.95	7	102	1221	1.221	1064	1.064	20	31.2	377_1	377
601	10.0167	7	102	1221	1.221	1065	1.065	20	31.2	377_1	377
604	10.0667	7	103	1221	1.221	1065	1.065	20	31.2	377_1	377
606	10.1	7	104	1287	1.287	1143	1.143	18	32.6	377_1	377
610	10.1667	7	106	1363	1.363	1226	1.226	17	34.3	377_1	377
613	10.2167	7	107	1403	1.403	1275	1.275	17	35.6	377_1	377
615	10.25	7	108	1415	1.415	1306	1.306	18	37.1	377_1	377
618	10.3	7	109	1418	1.418	1319	1.319	19	37.7	377_1	377
621	10.35	7	109	1462	1.462	1364	1.364	20	39.3	377_1	377
625	10.4167	7	109	1462	1.462	1364	1.364	20	39.3	377_1	377
628	10.4667	7	109	1405	1.405	1308	1.308	21	37.9	377_1	377
631	10.5167	7	109	1391	1.391	1291	1.291	22	37.9	377_1	377
633	10.55	7	110	1419	1.419	1299	1.299	23	38	377_1	377
636	10.6	7	110	1459	1.459	1314	1.314	22	37.5	377_1	377
640	10.6667	7	111	1483	1.483	1323	1.323	20	36.9	377_1	377
642	10.7	7	112	1483	1.483	1323	1.323	20	36.9	377_1	377
645	10.75	7	112	1529	1.529	1347	1.347	21	37.5	377_1	377
647	10.7833	7	112	1584	1.584	1391	1.391	23	39.2	377_1	377
650	10.8333	7	112	1655	1.655	1435	1.435	23	40.1	377_1	377
654	10.9	8	113	1716	1.716	1499	1.499	21	41.3	377_1	377
656	10.9333	8	113	1740	1.74	1519	1.519	22	42.6	377_1	377
658	10.9667	8	114	1763	1.763	1542	1.542	22	43.3	377_1	377
662	11.0333	8	114	1771	1.771	1560	1.56	20	42.9	377_1	377
664	11.0667	8	115	1771	1.771	1560	1.56	20	42.9	377_1	377
667	11.1167	8	116	1747	1.747	1541	1.541	20	42.4	377_1	377
669	11.15	8	116	1723	1.723	1522	1.522	21	42	377_1	377
672	11.2	8	117	1744	1.744	1528	1.528	22	42.2	377_1	377
676	11.2667	8	118	1731	1.731	1523	1.523	22	41.9	377_1	377
678	11.3	8	119	1734	1.734	1520	1.52	22	41.8	377_1	377
680	11.3333	8	119	1701	1.701	1479	1.479	25	41.7	377_1	377
681	11.35	8	120	1707	1.707	1468	1.468	27	42.1	377_1	377
683	11.3833	8	120	1760	1.76	1526	1.526	23	42.4	377_1	377
687	11.45	8	120	1831	1.831	1573	1.573	21	42.8	377_1	377
690	11.5	8	120	1829	1.829	1569	1.569	22	42.8	377_1	377
692	11.5333	8	120	1864	1.864	1584	1.584	24	43.7	377_1	377
696	11.6	8	120	1921	1.921	1636	1.636	24	44.8	377_1	377
698	11.6333	8	120	1943	1.943	1671	1.671	22	45.6	377_1	377
700	11.6667	8	120	1943	1.943	1672	1.672	22	45.6	377_1	377
703	11.7167	8	120	1896	1.896	1647	1.647	21	44.8	377_1	377
705	11.75	8	120	1891	1.891	1664	1.664	23	45.7	377_1	377
710	11.8333	8	120	1870	1.87	1669	1.669	21	45.5	377_1	377
712	11.8667	8	120	1867	1.867	1675	1.675	21	45.7	377_1	377
714	11.9	8	120	1799	1.799	1617	1.617	22	44.8	377_1	377
715	11.9167	8	120	1740	1.74	1561	1.561	22	43.6	377_1	377
718	11.9667	9	121	1813	1.813	1623	1.623	21	44.5	377_1	377
722	12.0333	9	121	1849	1.849	1648	1.648	21	44.8	377_1	377
725	12.0833	9	121	1820	1.82	1618	1.618	19	43.5	377_1	377
728	12.1333	9	122	1819	1.819	1595	1.595	22	43.3	377_1	377
730	12.1667	9	123	1692	1.692	1477	1.477	24	40.9	377_1	377
732	12.2	9	124	1868	1.868	1619	1.619	21	42.7	377_1	377
735	12.25	9	124	2045	2.045	1745	1.745	20	44.3	377_1	377
738	12.3	9	125	1992	1.992	1714	1.714	20	44.4	377_1	377
741	12.35	9	125	1994	1.994	1731	1.731	20	45	377_1	377
743	12.3833	9	125	2004	2.004	1736	1.736	24	46.6	377_1	377
744	12.4	9	126	2040	2.04	1775	1.775	25	48.1	377_1	377
747	12.45	9	126	2156	2.156	1869	1.869	23	49.1	377_1	377
749	12.4833	9	126	2085	2.085	1859	1.859	22	50.2	377_1	377
752	12.5333	9	126	2007	2.007	1818	1.818	23	50	377_1	377
755	12.5833	9	126	2003	2.003	1841	1.841	22	50.7	377_1	377
758	12.6333	9	127	2059	2.059	1909	1.909	23	52.7	377_1	377
760	12.6667	9	127	2059	2.059	1909	1.909	23	52.7	377_1	377
763	12.7167	9	127	2162	2.162	2015	2.015	21	53.8	377_1	377
766	12.7667	9	127	2092	2.092	1951	1.951	20	52.5	377_1	377
769	12.8167	9	127	2071	2.071	1937	1.937	20	51.4	377_1	377
773	12.8833	9	128	2072	2.072	1945	1.945	19	50.8	377_1	377
776	12.9333	9	128	2121	2.121	1981	1.981	19	50.9	377_1	377
779	12.9833	10	128	2094	2.094	1953	1.953	19	49.9	377_1	377
782	13.0333	10	128	2143	2.143	2000	2	19	51.2	377_1	377
785	13.0833	10	129	2094	2.094	1953	1.953	19	49.9	377_1	377
788	13.1333	10	129	2038	2.038	1910	1.91	19	49.2	377_1	377
791	13.1833	10	130	2040	2.04	1905	1.905	19	49	377_1	377
794	13.2333	10	130	2080	2.08	1941	1.941	19	50	377_1	377
797	13.2833	10	130	2091	2.091	1937	1.937	20	50.2	377_1	377
799	13.3167	10	130	2114	2.114	1945	1.945	22	50.9	377_1	377
802	13.3667	10	130	2112	2.112	1947	1.947	21	51	377_1	377
804	13.4	10	131	2123	2.123	1951	1.951	23	51.7	377_1	377
807	13.45	10	131	2161	2.161	1996	1.996	22	52.3	377_1	377
810	13.5	10	132	2221	2.221	2066	2.066	22	54.1	377_1	377
812	13.5333	10	132	2150	2.15	2011	2.011	23	53.5	377_1	377
814	13.5667	10	132	2093	2.093	1947	1.947	24	52.7	377_1	377
817	13.6167	10	132	2135	2.135	2001	2.001	23	53.2	377_1	377
820	13.6667	10	133	2127	2.127	1992	1.992	24	52.8	377_1	377
823	13.7167	10	133	2222	2.222	2100	2.1	22	55.1	377_1	377
824	13.7333	10	133	2220	2.22	2076	2.076	23	54.8	377_1	377
827	13.7833	10	133	2252	2.252	2110	2.11	23	55.2	377_1	377
830	13.8333	10	133	2281	2.281	2151	2.151	21	55.4	377_1	377
833	13.8833	10	134	2270	2.27	2143	2.143	20	54.4	377_1	377
836	13.9333	10	134	2249	2.249	2121	2.121	20	53.6	377_1	377
839	13.9833	11	134	2239	2.239	2115	2.115	20	53.4	377_1	377
841	14.0167	11	134	2239	2.239	2115	2.115	20	53.4	377_1	377
844	14.0667	11	134	2239	2.239	2115	2.115	20	53.4	377_1	377
847	14.1167	11	135	2242	2.242	2108	2.108	21	53.6	377_1	377
849	14.15	11	135	2269	2.269	2120	2.12	22	53.6	377_1	377
851	14.1833	11	135	2369	2.369	2210	2.21	23	56.5	377_1	377
854	14.2333	11	135	2373	2.373	2206	2.206	24	56.8	377_1	377
856	14.2667	11	135	2438	2.438	2262	2.262	26	59.2	377_1	377
858	14.3	11	135	2375	2.375	2218	2.218	25	59	377_1	377
861	14.35	11	136	2375	2.375	2218	2.218	25	59	377_1	377
863	14.3833	11	136	2319	2.319	2181	2.181	24	57.5	377_1	377
864	14.4	11	137	2266	2.266	2151	2.151	26	58.6	377_1	377
866	14.4333	11	137	2221	2.221	2109	2.109	28	58.2	377_1	377
868	14.4667	11	138	2233	2.233	2120	2.12	28	58.8	377_1	377
870	14.5	11	138	2284	2.284	2183	2.183	27	59.1	377_1	377
873	14.55	11	138	2310	2.31	2210	2.21	27	59.4	377_1	377
875	14.5833	11	138	2271	2.271	2175	2.175	31	60.7	377_1	377
876	14.6	11	138	2268	2.268	2169	2.169	32	61	377_1	377
877	14.6167	11	138	2313	2.313	2204	2.204	32	61.7	377_1	377
879	14.65	11	138	2328	2.328	2210	2.21	32	61.4	377_1	377
881	14.6833	11	138	2332	2.332	2204	2.204	33	61.1	377_1	377
884	14.7333	11	138	2279	2.279	2169	2.169	33	61.5	377_1	377
886	14.7667	11	138	2368	2.368	2246	2.246	33	62.1	377_1	377
888	14.8	11	138	2491	2.491	2374	2.374	30	63.5	377_1	377
890	14.8333	11	138	2485	2.485	2390	2.39	28	63.7	377_1	377
893	14.8833	11	138	2492	2.492	2389	2.389	28	63.4	377_1	377
895	14.9167	11	138	2484	2.484	2400	2.4	27	63.6	377_1	377
897	14.95	11	138	2401	2.401	2335	2.335	27	63.4	377_1	377
899	14.9833	12	139	2438	2.438	2364	2.364	27	64.2	377_1	377
902	15.0333	12	139	2346	2.346	2283	2.283	28	62.4	377_1	377
904	15.0667	12	140	2369	2.369	2313	2.313	28	63	377_1	377
907	15.1167	12	141	2319	2.319	2278	2.278	26	61.3	377_1	377
909	15.15	12	142	2342	2.342	2310	2.31	27	61.8	377_1	377
912	15.2	12	143	2283	2.283	2270	2.27	25	60.7	377_1	377
914	15.2333	12	144	2373	2.373	2327	2.327	26	62.2	377_1	377
916	15.2667	12	144	2373	2.373	2327	2.327	26	62.2	377_1	377
924	15.4	12	145	2382	2.382	2314	2.314	25	61.3	377_1	377
927	15.45	12	145	2380	2.38	2301	2.301	26	61.5	377_1	377
929	15.4833	12	146	2496	2.496	2437	2.437	27	64.7	377_1	377
931	15.5167	12	146	2509	2.509	2454	2.454	27	65.8	377_1	377
933	15.55	12	147	2633	2.633	2616	2.616	29	71.2	377_1	377
935	15.5833	12	147	2601	2.601	2656	2.656	28	72.1	377_1	377
937	15.6167	12	148	2553	2.553	2634	2.634	28	71.9	377_1	377
939	15.65	12	148	2606	2.606	2700	2.7	28	72.7	377_1	377
941	15.6833	12	149	2571	2.571	2657	2.657	29	72	377_1	377
944	15.7333	12	149	2577	2.577	2662	2.662	28	72.2	377_1	377
946	15.7667	12	150	2623	2.623	2713	2.713	27	73	377_1	377
948	15.8	12	150	2584	2.584	2686	2.686	27	73.1	377_1	377
950	15.8333	12	150	2572	2.572	2662	2.662	28	72.6	377_1	377
952	15.8667	12	150	2585	2.585	2691	2.691	28	73.2	377_1	377
954	15.9	12	150	2544	2.544	2650	2.65	29	72.7	377_1	377
956	15.9333	12	150	2548	2.548	2671	2.671	27	72.5	377_1	377
958	15.9667	13	150	2542	2.542	2643	2.643	28	71.2	377_1	377
961	16.0167	13	150	2562	2.562	2657	2.657	27	70.3	377_1	377
963	16.05	13	150	2569	2.569	2662	2.662	27	69.5	377_1	377
966	16.1	13	151	2569	2.569	2662	2.662	27	69.5	377_1	377
968	16.1333	13	151	2569	2.569	2662	2.662	27	69.5	377_1	377
970	16.1667	13	151	2596	2.596	2683	2.683	26	69.1	377_1	377
973	16.2167	13	151	2601	2.601	2703	2.703	26	70.1	377_1	377
975	16.25	13	151	2581	2.581	2699	2.699	26	71	377_1	377
977	16.2833	13	151	2582	2.582	2696	2.696	27	72	377_1	377
979	16.3167	13	152	2572	2.572	2696	2.696	27	72.6	377_1	377
981	16.35	13	152	2616	2.616	2736	2.736	27	72.6	377_1	377
983	16.3833	13	153	2618	2.618	2748	2.748	27	73	377_1	377
986	16.4333	13	153	2651	2.651	2797	2.797	28	74.7	377_1	377
988	16.4667	13	153	2693	2.693	2824	2.824	28	75.4	377_1	377
990	16.5	13	154	2682	2.682	2831	2.831	27	75.5	377_1	377
992	16.5333	13	154	2607	2.607	2763	2.763	27	74.6	377_1	377
995	16.5833	13	154	2642	2.642	2807	2.807	27	75	377_1	377
997	16.6167	13	154	2632	2.632	2806	2.806	27	75.1	377_1	377
999	16.65	13	155	2650	2.65	2831	2.831	27	75.1	377_1	377
1001	16.6833	13	155	2662	2.662	2850	2.85	27	75	377_1	377
1003	16.7167	13	155	2646	2.646	2837	2.837	27	75.1	377_1	377
1006	16.7667	13	156	2672	2.672	2867	2.867	27	75.3	377_1	377
1008	16.8	13	156	2713	2.713	2914	2.914	27	76.4	377_1	377
1010	16.8333	13	156	2714	2.714	2914	2.914	27	76.5	377_1	377
1012	16.8667	13	156	2768	2.768	2960	2.96	27	77.4	377_1	377
1014	16.9	13	156	2757	2.757	2962	2.962	27	78.1	377_1	377
1016	16.9333	13	156	2754	2.754	2965	2.965	28	78.3	377_1	377
1018	16.9667	14	157	2753	2.753	2969	2.969	29	79.1	377_1	377
1020	17	14	157	2754	2.754	2990	2.99	29	80	377_1	377
1022	17.0333	14	157	2734	2.734	2986	2.986	30	80.8	377_1	377
1025	17.0833	14	157	2735	2.735	2986	2.986	30	80.8	377_1	377
1027	17.1167	14	157	2764	2.764	3029	3.029	29	81.7	377_1	377
1029	17.15	14	157	2757	2.757	3024	3.024	28	79.9	377_1	377
1030	17.1667	14	158	2776	2.776	3053	3.053	28	80.7	377_1	377
1032	17.2	14	158	2778	2.778	3048	3.048	28	80.7	377_1	377
1034	17.2333	14	158	2829	2.829	3101	3.101	28	81.8	377_1	377
1036	17.2667	14	158	2811	2.811	3084	3.084	29	81.7	377_1	377
1038	17.3	14	158	2854	2.854	3139	3.139	30	84.6	377_1	377
1040	17.3333	14	159	2807	2.807	3106	3.106	30	84.8	377_1	377
1043	17.3833	14	159	2832	2.832	3130	3.13	28	83.7	377_1	377
1045	17.4167	14	159	2832	2.832	3130	3.13	28	83.7	377_1	377
1047	17.45	14	159	2837	2.837	3150	3.15	28	83.7	377_1	377
1049	17.4833	14	159	2826	2.826	3150	3.15	28	83.9	377_1	377
1051	17.5167	14	160	2859	2.859	3193	3.193	30	86.7	377_1	377
1053	17.55	14	160	2858	2.858	3209	3.209	30	87.6	377_1	377
1055	17.5833	14	161	2878	2.878	3235	3.235	31	88.5	377_1	377
1056	17.6	14	161	2879	2.879	3235	3.235	31	88.5	377_1	377
1058	17.6333	14	162	2876	2.876	3249	3.249	31	89.1	377_1	377
1060	17.6667	14	162	2875	2.875	3262	3.262	31	89.3	377_1	377
1062	17.7	14	163	2884	2.884	3292	3.292	31	90	377_1	377
1064	17.7333	14	163	2876	2.876	3293	3.293	31	90.5	377_1	377
1066	17.7667	14	163	2866	2.866	3287	3.287	31	90	377_1	377
1068	17.8	14	164	2806	2.806	3268	3.268	31	90.2	377_1	377
1070	17.8333	14	164	2828	2.828	3290	3.29	31	91.2	377_1	377
1072	17.8667	14	164	2858	2.858	3317	3.317	31	91.6	377_1	377
1074	17.9	14	164	2854	2.854	3308	3.308	31	91.2	377_1	377
1076	17.9333	14	164	2886	2.886	3329	3.329	31	91.6	377_1	377
1078	17.9667	14	164	2914	2.914	3352	3.352	31	91.4	377_1	377
1080	18	15	165	3020	3.02	3421	3.421	31	91.7	377_1	377
1082	18.0333	15	165	3021	3.021	3421	3.421	31	91.7	377_1	377
1084	18.0667	15	165	3025	3.025	3430	3.43	31	91.8	377_1	377
1086	18.1	15	165	3017	3.017	3411	3.411	31	91.7	377_1	377
1087	18.1167	15	165	3048	3.048	3434	3.434	31	92.2	377_1	377
1089	18.15	15	165	3052	3.052	3437	3.437	31	92.5	377_1	377
1091	18.1833	15	165	3047	3.047	3419	3.419	31	92.1	377_1	377
1093	18.2167	15	166	3005	3.005	3375	3.375	32	91.5	377_1	377
1095	18.25	15	166	3058	3.058	3427	3.427	32	92.3	377_1	377
1097	18.2833	15	166	3063	3.063	3445	3.445	32	92.6	377_1	377
1099	18.3167	15	166	3037	3.037	3435	3.435	32	92.9	377_1	377
1100	18.3333	15	166	3057	3.057	3461	3.461	33	94.7	377_1	377
1102	18.3667	15	166	3011	3.011	3412	3.412	34	94	377_1	377
1104	18.4	15	166	3042	3.042	3458	3.458	34	94.7	377_1	377
1106	18.4333	15	167	3097	3.097	3522	3.522	33	95.7	377_1	377
1108	18.4667	15	167	3044	3.044	3480	3.48	33	95	377_1	377
1110	18.5	15	167	3004	3.004	3454	3.454	32	92.3	377_1	377
1111	18.5167	15	167	3068	3.068	3520	3.52	32	93.8	377_1	377
1113	18.55	15	167	3011	3.011	3456	3.456	33	92.6	377_1	377
1115	18.5833	15	166	3051	3.051	3478	3.478	33	92.6	377_1	377
1117	18.6167	15	167	3056	3.056	3484	3.484	33	92.4	377_1	377
1118	18.6333	15	166	3022	3.022	3443	3.443	35	92.9	377_1	377
1119	18.65	15	166	3046	3.046	3457	3.457	38	95.2	377_1	377
1121	18.6833	15	166	3061	3.061	3467	3.467	41	97.4	377_1	377
1122	18.7	15	166	3067	3.067	3500	3.5	38	96.3	377_1	377
1124	18.7333	15	167	3115	3.115	3539	3.539	39	97.3	377_1	377
1126	18.7667	15	167	3120	3.12	3577	3.577	38	98.2	377_1	377
1127	18.7833	15	167	3172	3.172	3649	3.649	39	101.3	377_1	377
1129	18.8167	15	167	3173	3.173	3649	3.649	39	101.3	377_1	377
1130	18.8333	15	168	3215	3.215	3730	3.73	38	103.1	377_1	377
1132	18.8667	15	168	3159	3.159	3711	3.711	36	103	377_1	377
1134	18.9	15	168	3197	3.197	3775	3.775	37	105.4	377_1	377
1135	18.9167	15	168	3062	3.062	3636	3.636	38	103.3	377_1	377
1137	18.95	15	169	3139	3.139	3736	3.736	37	104.4	377_1	377
1138	18.9667	15	169	3017	3.017	3604	3.604	38	101.7	377_1	377
1140	19	16	169	3084	3.084	3675	3.675	37	102.8	377_1	377
1142	19.0333	16	169	2993	2.993	3576	3.576	36	99.3	377_1	377
1144	19.0667	16	170	3037	3.037	3621	3.621	35	98.6	377_1	377
1145	19.0833	16	170	2941	2.941	3507	3.507	36	97	377_1	377
1146	19.1	16	170	3016	3.016	3574	3.574	37	98.8	377_1	377
1148	19.1333	16	170	2970	2.97	3504	3.504	38	97.3	377_1	377
1150	19.1667	16	170	2986	2.986	3491	3.491	39	97	377_1	377
1151	19.1833	16	170	2948	2.948	3485	3.485	36	94.4	377_1	377
1152	19.2	16	170	2967	2.967	3470	3.47	39	95.8	377_1	377
1153	19.2167	16	170	2975	2.975	3445	3.445	42	97.2	377_1	377
1155	19.25	16	170	2995	2.995	3442	3.442	44	97.1	377_1	377
1156	19.2667	16	171	2995	2.995	3442	3.442	44	97.1	377_1	377
1157	19.2833	16	171	3030	3.03	3463	3.463	44	98.2	377_1	377
1159	19.3167	16	171	3100	3.1	3548	3.548	45	100.6	377_1	377
1160	19.3333	16	171	3099	3.099	3560	3.56	44	101.2	377_1	377
1162	19.3667	16	171	3149	3.149	3609	3.609	43	102.4	377_1	377
1163	19.3833	16	171	3187	3.187	3675	3.675	43	104.5	377_1	377
1164	19.4	16	172	3253	3.253	3759	3.759	44	106.9	377_1	377
1165	19.4167	16	172	3252	3.252	3804	3.804	44	109.1	377_1	377
1167	19.45	16	172	3182	3.182	3759	3.759	44	109.3	377_1	377
1168	19.4667	16	172	3112	3.112	3676	3.676	46	110	377_1	377
1169	19.4833	16	172	3138	3.138	3713	3.713	47	110.5	377_1	377
1171	19.5167	16	173	3189	3.189	3786	3.786	46	110.1	377_1	377
1172	19.5333	16	173	3157	3.157	3766	3.766	43	107.9	377_1	377
1174	19.5667	16	173	3059	3.059	3653	3.653	44	107.2	377_1	377
1175	19.5833	16	173	3057	3.057	3640	3.64	44	106.2	377_1	377
1176	19.6	16	173	3114	3.114	3703	3.703	45	107.2	377_1	377
1178	19.6333	16	173	3194	3.194	3798	3.798	43	107.3	377_1	377
1179	19.65	16	173	3231	3.231	3860	3.86	42	107.9	377_1	377
1181	19.6833	16	174	3180	3.18	3805	3.805	41	106.5	377_1	377
1182	19.7	16	174	3197	3.197	3810	3.81	43	107.4	377_1	377
1183	19.7167	16	174	3277	3.277	3912	3.912	42	107.9	377_1	377
1185	19.75	16	174	3290	3.29	3938	3.938	40	107.1	377_1	377
1186	19.7667	16	174	3242	3.242	3877	3.877	41	107.3	377_1	377
1188	19.8	16	174	3173	3.173	3793	3.793	43	106.9	377_1	377
1189	19.8167	16	174	3092	3.092	3692	3.692	44	105.8	377_1	377
1190	19.8333	16	174	3158	3.158	3763	3.763	45	106.8	377_1	377
1191	19.85	16	174	3193	3.193	3818	3.818	44	106.7	377_1	377
1193	19.8833	16	174	3155	3.155	3794	3.794	42	105.5	377_1	377
1195	19.9167	16	174	3103	3.103	3742	3.742	43	105.5	377_1	377
1196	19.9333	16	174	3095	3.095	3742	3.742	44	105.3	377_1	377
1197	19.95	16	175	3126	3.126	3777	3.777	44	106.1	377_1	377
1198	19.9667	16	174	3175	3.175	3824	3.824	44	106.5	377_1	377
1200	20	16	175	3189	3.189	3850	3.85	43	107.5	377_1	377
1201	20.0167	17	175	3245	3.245	3944	3.944	42	109.6	377_1	377
1203	20.05	17	175	3214	3.214	3898	3.898	44	110.9	377_1	377
1204	20.0667	17	175	3204	3.204	3877	3.877	44	110.5	377_1	377
1206	20.1	17	175	3284	3.284	3982	3.982	44	112.2	377_1	377
1207	20.1167	17	175	3227	3.227	3950	3.95	43	112	377_1	377
1209	20.15	17	175	3259	3.259	3986	3.986	43	111.9	377_1	377
1210	20.1667	17	175	3182	3.182	3885	3.885	41	107	377_1	377
1213	20.2167	17	175	3102	3.102	3785	3.785	39	102.8	377_1	377
1215	20.25	5	175	3052	3.052	3744	3.744	35	99.4	377_1	377
1217	20.2833	5	174	2973	2.973	3692	3.692	33	97.3	377_1	377
1219	20.3167	5	173	2831	2.831	3555	3.555	31	94.1	377_1	377
1220	20.3333	5	172	2789	2.789	3549	3.549	31	95.1	377_1	377
1223	20.3833	5	171	2666	2.666	3432	3.432	30	92.8	377_1	377
1225	20.4167	5	171	2666	2.666	3432	3.432	30	92.8	377_1	377
1226	20.4333	5	170	2709	2.709	3502	3.502	32	93.8	377_1	377
1228	20.4667	5	170	2679	2.679	3493	3.493	33	93.1	377_1	377
1230	20.5	5	169	2694	2.694	3525	3.525	33	91.9	377_1	377
1232	20.5333	5	168	2742	2.742	3611	3.611	33	91.8	377_1	377
1234	20.5667	5	166	2703	2.703	3577	3.577	32	89.5	377_1	377
1236	20.6	5	165	2703	2.703	3577	3.577	32	89.5	377_1	377
1238	20.6333	5	164	2589	2.589	3439	3.439	32	86.8	377_1	377
1240	20.6667	5	162	2590	2.59	3439	3.439	32	86.8	377_1	377
1242	20.7	5	162	2608	2.608	3473	3.473	31	85.3	377_1	377
1244	20.7333	5	161	2623	2.623	3529	3.529	30	85.9	377_1	377
1246	20.7667	5	159	2528	2.528	3411	3.411	31	84.5	377_1	377
1248	20.8	5	158	2486	2.486	3394	3.394	30	84.2	377_1	377
1250	20.8333	5	157	2501	2.501	3441	3.441	30	85.2	377_1	377
1252	20.8667	5	156	2454	2.454	3418	3.418	29	84.8	377_1	377
1254	20.9	5	155	2282	2.282	3201	3.201	29	81.4	377_1	377
1256	20.9333	5	154	2192	2.192	3110	3.11	29	79.8	377_1	377
1259	20.9833	5	153	2096	2.096	2981	2.981	28	76.1	377_1	377
1261	21.0167	5	152	2047	2.047	2921	2.921	28	74.1	377_1	377
1263	21.05	5	152	1946	1.946	2786	2.786	28	71.1	377_1	377
1265	21.0833	5	151	1888	1.888	2709	2.709	29	70.5	377_1	377
1267	21.1167	5	151	1879	1.879	2687	2.687	29	69.5	377_1	377
1269	21.15	5	150	1875	1.875	2672	2.672	29	69.3	377_1	377
1272	21.2	5	149	1875	1.875	2672	2.672	29	69.3	377_1	377
1274	21.2333	5	148	1901	1.901	2706	2.706	28	70.1	377_1	377
1276	21.2667	5	147	1928	1.928	2733	2.733	27	70.5	377_1	377
1278	21.3	5	147	1917	1.917	2715	2.715	27	69.4	377_1	377
1280	21.3333	5	146	1894	1.894	2694	2.694	27	69.5	377_1	377
1282	21.3667	5	145	1877	1.877	2678	2.678	27	69.8	377_1	377
1285	21.4167	5	144	1866	1.866	2673	2.673	27	70.6	377_1	377
1287	21.45	5	143	1761	1.761	2546	2.546	28	69	377_1	377
1289	21.4833	5	142	1688	1.688	2449	2.449	28	67.6	377_1	377
1291	21.5167	5	142	1656	1.656	2407	2.407	28	67.2	377_1	377
1293	21.55	5	141	1659	1.659	2414	2.414	28	67.5	377_1	377
1296	21.6	5	141	1635	1.635	2381	2.381	27	66.8	377_1	377
1298	21.6333	5	141	1629	1.629	2368	2.368	26	64.5	377_1	377
1301	21.6833	5	140	1632	1.632	2377	2.377	25	64.5	377_1	377
1303	21.7167	5	140	1604	1.604	2335	2.335	25	63.5	377_1	377
1305	21.75	5	139	1595	1.595	2319	2.319	25	63.2	377_1	377
1307	21.7833	5	138	1550	1.55	2249	2.249	26	61.5	377_1	377
1310	21.8333	5	137	1516	1.516	2196	2.196	26	60.5	377_1	377
1312	21.8667	5	137	1516	1.516	2197	2.197	26	60.5	377_1	377
1314	21.9	5	136	1476	1.476	2137	2.137	28	61.2	377_1	377
1316	21.9333	5	136	1430	1.43	2071	2.071	27	59.9	377_1	377
1318	21.9667	5	135	1469	1.469	2121	2.121	28	60.9	377_1	377
1321	22.0167	5	135	1423	1.423	2054	2.054	27	59.3	377_1	377
1323	22.05	5	134	1374	1.374	1979	1.979	27	57.6	377_1	377
1325	22.0833	5	133	1333	1.333	1922	1.922	27	56.6	377_1	377
1327	22.1167	5	132	1351	1.351	1937	1.937	27	57.2	377_1	377
1329	22.15	5	132	1372	1.372	1958	1.958	27	57.5	377_1	377
1331	22.1833	5	131	1379	1.379	1966	1.966	27	58.2	377_1	377
1333	22.2167	5	131	1378	1.378	1954	1.954	27	58.6	377_1	377
1336	22.2667	5	131	1413	1.413	1998	1.998	27	59.9	377_1	377
1338	22.3	5	131	1412	1.412	1984	1.984	27	59.6	377_1	377
1341	22.35	5	131	1412	1.412	1984	1.984	27	59.6	377_1	377
1343	22.3833	5	131	1425	1.425	1986	1.986	26	58.7	377_1	377
1346	22.4333	5	131	1357	1.357	1878	1.878	27	56.9	377_1	377
1348	22.4667	5	130	1337	1.337	1840	1.84	27	55.5	377_1	377
1350	22.5	5	130	1337	1.337	1840	1.84	27	55.5	377_1	377
1353	22.55	5	129	1328	1.328	1814	1.814	26	53.8	377_1	377
1355	22.5833	5	129	1303	1.303	1766	1.766	26	52.4	377_1	377
1357	22.6167	5	128	1346	1.346	1821	1.821	26	54	377_1	377
1360	22.6667	5	127	1280	1.28	1734	1.734	26	52.4	377_1	377
1362	22.7	5	126	1279	1.279	1730	1.73	26	52.3	377_1	377
1364	22.7333	5	126	1249	1.249	1689	1.689	26	51.6	377_1	377
1366	22.7667	5	126	1250	1.25	1689	1.689	26	51.6	377_1	377
1368	22.8	5	126	1216	1.216	1633	1.633	27	51.4	377_1	377
1371	22.85	5	126	1221	1.221	1631	1.631	27	51.5	377_1	377
1373	22.8833	5	126	1219	1.219	1614	1.614	27	51.1	377_1	377
1375	22.9167	5	126	1182	1.182	1559	1.559	27	49.4	377_1	377
1377	22.95	5	126	1209	1.209	1600	1.6	28	50.6	377_1	377
1379	22.9833	5	126	1271	1.271	1682	1.682	27	53.3	377_1	377
1382	23.0333	5	126	1223	1.223	1614	1.614	27	51.8	377_1	377
1384	23.0667	5	126	1197	1.197	1582	1.582	26	50.9	377_1	377
1386	23.1	5	126	1175	1.175	1555	1.555	26	50.3	377_1	377
1389	23.15	5	126	1147	1.147	1520	1.52	26	48.8	377_1	377
1392	23.2	5	125	1144	1.144	1518	1.518	26	48.9	377_1	377
1395	23.25	5	125	1159	1.159	1515	1.515	24	47.1	377_1	377
1397	23.2833	5	124	1159	1.159	1515	1.515	24	47.1	377_1	377
