# Supplementary material for: On the development of diagnostic support algorithms based on CPET biosignals data via machine learning and wavelets
Source: PeerJ journal article supplement (doi:10.7717/peerj-cs.2474), 2025-01-30
Supplement: raw_data.zip [file Subject_37.xlsx]

## Sheet: Folha1
time	time	Speed	HR	VO2	VO2	VCO2	VCO2	RR	VE	ID_test	ID
	min	km/h	/min	ml/min	L/min	ml/min	L/min	/min	L/min
0	0	5		268	0.268	241	0.241	33	10	245_1	245
55	0.916667	5	136	2629	2.629	1563	1.563	26	48.1	245_1	245
58	0.966667	5	81	1227	1.227	806	0.806	19	29.8	245_1	245
60	1	5	81	1136	1.136	765	0.765	26	28.8	245_1	245
64	1.06667	5	135	1415	1.415	944	0.944	22	28.4	245_1	245
68	1.13333	5	132	1301	1.301	853	0.853	18	26.5	245_1	245
72	1.2	5	131	1345	1.345	901	0.901	18	28.4	245_1	245
74	1.23333	5	129	1346	1.346	901	0.901	18	28.4	245_1	245
76	1.26667	5	128	1257	1.257	829	0.829	20	26.1	245_1	245
79	1.31667	5	128	1314	1.314	882	0.882	20	26.1	245_1	245
82	1.36667	5	126	1377	1.377	936	0.936	18	27.2	245_1	245
87	1.45	5	126	1262	1.262	902	0.902	17	28.2	245_1	245
90	1.5	5	102	1206	1.206	902	0.902	21	28.2	245_1	245
92	1.53333	5	101	1207	1.207	902	0.902	21	28.2	245_1	245
95	1.58333	5	99	1181	1.181	890	0.89	20	27.2	245_1	245
97	1.61667	5	97	1209	1.209	904	0.904	19	27.2	245_1	245
102	1.7	5	99	1239	1.239	927	0.927	17	27.4	245_1	245
104	1.73333	5	99	1213	1.213	910	0.91	18	26.7	245_1	245
106	1.76667	5	99	1094	1.094	800	0.8	21	23.8	245_1	245
110	1.83333	5	99	1277	1.277	954	0.954	21	27	245_1	245
113	1.88333	5	100	1116	1.116	824	0.824	20	23.9	245_1	245
114	1.9	5	101	1072	1.072	786	0.786	21	23.8	245_1	245
115	1.91667	5	102	1036	1.036	777	0.777	24	24.6	245_1	245
116	1.93333	5	104	905	0.905	687	0.687	33	23.6	245_1	245
118	1.96667	5	102	705	0.705	551	0.551	36	20.1	245_1	245
121	2.01667	5	127	983	0.983	740	0.74	31	23.2	245_1	245
125	2.08333	5	128	1025	1.025	775	0.775	25	23.5	245_1	245
128	2.13333	5	126	1085	1.085	818	0.818	24	24.2	245_1	245
131	2.18333	5	121	1170	1.17	872	0.872	21	25.6	245_1	245
133	2.21667	5	113	1172	1.172	862	0.862	20	24.9	245_1	245
135	2.25	5	106	1054	1.054	779	0.779	22	23	245_1	245
137	2.28333	5	100	1066	1.066	807	0.807	22	23.2	245_1	245
140	2.33333	5	93	1037	1.037	807	0.807	21	23.5	245_1	245
143	2.38333	5	90	898	0.898	718	0.718	24	22.5	245_1	245
147	2.45	5	90	758	0.758	633	0.633	22	21.4	245_1	245
148	2.46667	5	88	666	0.666	586	0.586	26	20.9	245_1	245
151	2.51667	5	88	695	0.695	609	0.609	30	21.3	245_1	245
153	2.55	5	86	593	0.593	552	0.552	26	20.7	245_1	245
157	2.61667	5	84	591	0.591	540	0.54	24	21	245_1	245
159	2.65	5	83	561	0.561	502	0.502	21	20.1	245_1	245
162	2.7	5	82	510	0.51	460	0.46	20	18	245_1	245
166	2.76667	5	80	526	0.526	466	0.466	21	17.6	245_1	245
170	2.83333	5	79	525	0.525	465	0.465	21	17.6	245_1	245
176	2.93333	5	80	476	0.476	419	0.419	20	15.9	245_1	245
179	2.98333	5	81	559	0.559	469	0.469	19	16.3	245_1	245
185	3.08333	5	83	614	0.614	514	0.514	17	17.2	245_1	245
190	3.16667	5	83	694	0.694	592	0.592	14	19	245_1	245
193	3.21667	5	84	699	0.699	593	0.593	15	19.1	245_1	245
195	3.25	5	86	692	0.692	588	0.588	15	18.9	245_1	245
198	3.3	5	87	627	0.627	517	0.517	17	17	245_1	245
200	3.33333	5	88	733	0.733	621	0.621	15	19.8	245_1	245
204	3.4	5	88	716	0.716	622	0.622	17	20.1	245_1	245
206	3.43333	5	89	727	0.727	631	0.631	21	20.7	245_1	245
210	3.5	5	91	784	0.784	638	0.638	23	20.2	245_1	245
213	3.55	5	93	782	0.782	635	0.635	22	19.9	245_1	245
215	3.58333	5	94	821	0.821	672	0.672	26	21	245_1	245
218	3.63333	5	95	937	0.937	766	0.766	23	23	245_1	245
223	3.71667	5	96	957	0.957	790	0.79	18	23.7	245_1	245
226	3.76667	5	97	972	0.972	804	0.804	18	24.1	245_1	245
227	3.78333	5	98	943	0.943	781	0.781	17	23.3	245_1	245
231	3.85	5	97	952	0.952	792	0.792	18	23.6	245_1	245
232	3.86667	5	96	960	0.96	802	0.802	21	24.4	245_1	245
235	3.91667	5	96	987	0.987	817	0.817	19	24.5	245_1	245
237	3.95	5	95	950	0.95	801	0.801	21	24.7	245_1	245
240	4	5	93	952	0.952	798	0.798	24	25.1	245_1	245
242	4.03333	5	90	952	0.952	798	0.798	24	25.1	245_1	245
245	4.08333	5	89	1038	1.038	875	0.875	24	27.1	245_1	245
248	4.13333	5	87	968	0.968	827	0.827	25	25.8	245_1	245
250	4.16667	5	87	969	0.969	827	0.827	25	25.8	245_1	245
253	4.21667	5	86	925	0.925	800	0.8	26	25.5	245_1	245
255	4.25	5	87	970	0.97	856	0.856	28	27.3	245_1	245
258	4.3	5	86	879	0.879	774	0.774	27	24.9	245_1	245
261	4.35	5	86	921	0.921	798	0.798	25	25.2	245_1	245
262	4.36667	5	86	858	0.858	741	0.741	22	23.3	245_1	245
264	4.4	5	86	806	0.806	697	0.697	24	23	245_1	245
265	4.41667	5	86	895	0.895	783	0.783	26	25.5	245_1	245
268	4.46667	5	86	919	0.919	799	0.799	25	25.8	245_1	245
270	4.5	5	87	910	0.91	778	0.778	25	25.3	245_1	245
272	4.53333	5	87	1002	1.002	853	0.853	26	26.5	245_1	245
275	4.58333	5	87	847	0.847	707	0.707	27	23	245_1	245
277	4.61667	5	88	974	0.974	807	0.807	25	25.6	245_1	245
280	4.66667	5	90	1024	1.024	853	0.853	24	26.1	245_1	245
283	4.71667	5	92	999	0.999	830	0.83	22	24.9	245_1	245
285	4.75	5	94	1014	1.014	847	0.847	23	25.6	245_1	245
288	4.8	5	96	1014	1.014	848	0.848	23	25.6	245_1	245
292	4.86667	5.1	98	1095	1.095	917	0.917	21	27.3	245_1	245
296	4.93333	5.1	100	1154	1.154	982	0.982	18	28.9	245_1	245
299	4.98333	5.2	101	1116	1.116	964	0.964	18	28.4	245_1	245
300	5	5.2	101	1101	1.101	957	0.957	19	28.5	245_1	245
302	5.03333	5.2	101	1098	1.098	962	0.962	20	28.6	245_1	245
305	5.08333	5.3	101	1119	1.119	982	0.982	20	29	245_1	245
307	5.11667	5.3	102	1056	1.056	929	0.929	23	28.2	245_1	245
310	5.16667	5.4	102	1055	1.055	929	0.929	23	28.2	245_1	245
313	5.21667	5.4	103	1096	1.096	928	0.928	24	27.5	245_1	245
317	5.28333	5.5	103	1115	1.115	933	0.933	22	27	245_1	245
318	5.3	5.5	104	1184	1.184	983	0.983	21	28.1	245_1	245
323	5.38333	5.6	105	1241	1.241	1042	1.042	17	29.5	245_1	245
326	5.43333	5.6	105	1242	1.242	1042	1.042	17	29.5	245_1	245
328	5.46667	5.7	105	1221	1.221	1033	1.033	16	29.2	245_1	245
331	5.51667	5.7	105	1203	1.203	1036	1.036	17	29.6	245_1	245
334	5.56667	5.8	104	1201	1.201	1042	1.042	17	29.7	245_1	245
338	5.63333	5.8	105	1244	1.244	1085	1.085	17	31.2	245_1	245
341	5.68333	5.9	104	1182	1.182	1037	1.037	18	29.8	245_1	245
344	5.73333	5.9	104	1123	1.123	983	0.983	21	28.4	245_1	245
347	5.78333	6	106	1183	1.183	1025	1.025	20	29.4	245_1	245
351	5.85	6	106	1180	1.18	1020	1.02	20	29.2	245_1	245
355	5.91667	6.1	107	1133	1.133	975	0.975	18	27.6	245_1	245
358	5.96667	6.2	107	1095	1.095	936	0.936	19	26.4	245_1	245
363	6.05	6.3	106	1094	1.094	936	0.936	19	26.4	245_1	245
366	6.1	6.3	106	1106	1.106	939	0.939	19	26.6	245_1	245
368	6.13333	6.3	105	1136	1.136	963	0.963	19	27.4	245_1	245
371	6.18333	6.4	105	1137	1.137	965	0.965	20	27.5	245_1	245
374	6.23333	6.4	106	1187	1.187	1012	1.012	22	29.1	245_1	245
378	6.3	6.5	106	1282	1.282	1096	1.096	19	30.9	245_1	245
380	6.33333	6.5	107	1267	1.267	1087	1.087	19	31.2	245_1	245
383	6.38333	6.6	108	1156	1.156	1000	1	23	29.5	245_1	245
385	6.41667	6.6	108	1199	1.199	1042	1.042	24	30.4	245_1	245
388	6.46667	6.7	108	1176	1.176	1033	1.033	23	30.1	245_1	245
391	6.51667	6.7	107	1173	1.173	1047	1.047	22	30.6	245_1	245
395	6.58333	6.8	108	1163	1.163	1043	1.043	21	30.6	245_1	245
397	6.61667	6.8	108	1104	1.104	984	0.984	22	28.9	245_1	245
400	6.66667	6.9	108	1148	1.148	1017	1.017	21	29.4	245_1	245
404	6.73333	6.9	109	1205	1.205	1058	1.058	20	30.1	245_1	245
408	6.8	7	109	1224	1.224	1084	1.084	19	30.9	245_1	245
410	6.83333	7	109	1238	1.238	1088	1.088	19	30.7	245_1	245
413	6.88333	7.1	110	1208	1.208	1045	1.045	20	29.2	245_1	245
418	6.96667	7.2	111	1273	1.273	1099	1.099	19	30.2	245_1	245
420	7	7.2	111	1273	1.273	1099	1.099	19	30.2	245_1	245
423	7.05	7.3	111	1292	1.292	1116	1.116	19	30.5	245_1	245
426	7.1	7.3	112	1296	1.296	1115	1.115	21	30.5	245_1	245
429	7.15	7.4	114	1251	1.251	1064	1.064	22	29.2	245_1	245
433	7.21667	7.4	115	1325	1.325	1123	1.123	20	30.4	245_1	245
436	7.26667	7.5	115	1369	1.369	1166	1.166	19	31.6	245_1	245
440	7.33333	7.5	116	1368	1.368	1166	1.166	19	31.6	245_1	245
444	7.4	7.6	117	1462	1.462	1237	1.237	20	33	245_1	245
446	7.43333	7.6	117	1446	1.446	1221	1.221	19	32.7	245_1	245
449	7.48333	7.7	118	1470	1.47	1246	1.246	19	33.1	245_1	245
452	7.53333	7.7	118	1538	1.538	1305	1.305	19	34.4	245_1	245
456	7.6	7.8	119	1525	1.525	1300	1.3	19	34.4	245_1	245
459	7.65	7.9	120	1544	1.544	1319	1.319	19	34.4	245_1	245
462	7.7	7.9	121	1476	1.476	1272	1.272	19	33.4	245_1	245
464	7.73333	7.9	122	1477	1.477	1272	1.272	19	33.4	245_1	245
468	7.8	8	123	1530	1.53	1317	1.317	19	34.4	245_1	245
470	7.83333	8	124	1513	1.513	1302	1.302	19	34.3	245_1	245
472	7.86667	8.1	126	1518	1.518	1309	1.309	20	34.6	245_1	245
475	7.91667	8.1	127	1547	1.547	1356	1.356	20	36.4	245_1	245
478	7.96667	8.2	127	1574	1.574	1384	1.384	22	37.4	245_1	245
480	8	8.2	128	1613	1.613	1420	1.42	22	38.4	245_1	245
484	8.06667	8.3	129	1615	1.615	1424	1.424	22	38.6	245_1	245
486	8.1	8.3	130	1593	1.593	1378	1.378	24	37.3	245_1	245
489	8.15	8.3	131	1646	1.646	1429	1.429	24	38.2	245_1	245
492	8.2	8.4	132	1711	1.711	1492	1.492	22	39.7	245_1	245
495	8.25	8.4	132	1671	1.671	1452	1.452	22	38.9	245_1	245
497	8.28333	8.5	133	1670	1.67	1455	1.455	22	39.3	245_1	245
500	8.33333	8.5	133	1753	1.753	1541	1.541	22	40.9	245_1	245
502	8.36667	8.6	133	1782	1.782	1583	1.583	22	41.9	245_1	245
505	8.41667	8.6	134	1837	1.837	1664	1.664	21	44	245_1	245
508	8.46667	8.7	134	1837	1.837	1689	1.689	21	44.3	245_1	245
510	8.5	8.7	135	1730	1.73	1595	1.595	24	42.1	245_1	245
512	8.53333	8.7	135	1836	1.836	1690	1.69	23	44.5	245_1	245
514	8.56667	8.8	133	1957	1.957	1811	1.811	24	46.9	245_1	245
517	8.61667	8.8	130	1991	1.991	1876	1.876	24	49.5	245_1	245
519	8.65	8.9	131	1888	1.888	1784	1.784	25	47.2	245_1	245
522	8.7	8.9	131	2000	2	1899	1.899	26	49.5	245_1	245
525	8.75	9	132	1959	1.959	1881	1.881	24	49.6	245_1	245
528	8.8	9	132	2041	2.041	1964	1.964	23	51.3	245_1	245
530	8.83333	9	135	2037	2.037	1979	1.979	22	51.9	245_1	245
533	8.88333	9.1	138	1974	1.974	1933	1.933	21	51	245_1	245
536	8.93333	9.1	138	1905	1.905	1876	1.876	21	49.5	245_1	245
540	9	9.2	138	1905	1.905	1876	1.876	21	49.5	245_1	245
543	9.05	9.3	138	1919	1.919	1871	1.871	21	48.8	245_1	245
546	9.1	9.3	138	1900	1.9	1859	1.859	20	48.6	245_1	245
548	9.13333	9.3	138	1916	1.916	1883	1.883	20	49.2	245_1	245
551	9.18333	9.4	138	1886	1.886	1869	1.869	21	49.3	245_1	245
554	9.23333	9.4	138	1868	1.868	1831	1.831	21	47.9	245_1	245
557	9.28333	9.5	132	1888	1.888	1832	1.832	19	47.3	245_1	245
560	9.33333	9.5	128	1916	1.916	1836	1.836	21	46.8	245_1	245
563	9.38333	9.6	128	1903	1.903	1822	1.822	20	46.4	245_1	245
566	9.43333	9.6	128	1981	1.981	1903	1.903	21	48.6	245_1	245
568	9.46667	9.7	128	1903	1.903	1822	1.822	20	46.4	245_1	245
571	9.51667	9.7	128	1855	1.855	1772	1.772	20	45.2	245_1	245
574	9.56667	9.8	134	1901	1.901	1827	1.827	20	46.8	245_1	245
576	9.6	9.8	137	1879	1.879	1808	1.808	22	46.9	245_1	245
579	9.65	9.8	137	1925	1.925	1863	1.863	23	48.7	245_1	245
582	9.7	9.9	137	1866	1.866	1812	1.812	21	47.7	245_1	245
585	9.75	10	137	1762	1.762	1700	1.7	22	44.3	245_1	245
588	9.8	10	137	1821	1.821	1750	1.75	22	45.7	245_1	245
590	9.83333	10	137	1876	1.876	1792	1.792	22	46.6	245_1	245
593	9.88333	10.1	137	1875	1.875	1792	1.792	22	46.6	245_1	245
596	9.93333	10.1	136	1825	1.825	1730	1.73	22	44.7	245_1	245
599	9.98333	10.2	136	1842	1.842	1731	1.731	21	44.4	245_1	245
602	10.0333	10.2	136	1895	1.895	1788	1.788	21	46	245_1	245
604	10.0667	10.3	136	1902	1.902	1801	1.801	22	46.3	245_1	245
607	10.1167	10.3	136	1935	1.935	1830	1.83	21	47.1	245_1	245
610	10.1667	10.4	129	1922	1.922	1810	1.81	21	46.5	245_1	245
612	10.2	10.4	129	1924	1.924	1783	1.783	23	45.2	245_1	245
615	10.25	10.5	129	1999	1.999	1874	1.874	21	48.1	245_1	245
618	10.3	10.5	121	1945	1.945	1838	1.838	22	47.8	245_1	245
620	10.3333	10.5	116	1912	1.912	1787	1.787	24	46.1	245_1	245
622	10.3667	10.6	116	1975	1.975	1834	1.834	24	46.5	245_1	245
625	10.4167	10.6	124	1984	1.984	1838	1.838	23	46.8	245_1	245
628	10.4667	10.7	131	2018	2.018	1877	1.877	22	48.1	245_1	245
631	10.5167	10.7	131	1998	1.998	1858	1.858	22	47.6	245_1	245
634	10.5667	10.8	132	1891	1.891	1774	1.774	23	46	245_1	245
636	10.6	10.8	134	1901	1.901	1766	1.766	22	45.3	245_1	245
638	10.6333	10.8	134	1818	1.818	1690	1.69	23	43.9	245_1	245
640	10.6667	10.9	134	1869	1.869	1734	1.734	22	45.2	245_1	245
642	10.7	10.9	134	1930	1.93	1789	1.789	24	46.3	245_1	245
644	10.7333	10.9	134	2025	2.025	1880	1.88	25	49.6	245_1	245
647	10.7833	11	135	1977	1.977	1851	1.851	25	49.6	245_1	245
649	10.8167	11	135	2023	2.023	1909	1.909	27	51.1	245_1	245
652	10.8667	11.1	138	2175	2.175	2050	2.05	24	54.1	245_1	245
654	10.9	11.1	138	2282	2.282	2131	2.131	25	55.5	245_1	245
657	10.95	11.2	139	2188	2.188	2055	2.055	23	54.3	245_1	245
660	11	11.2	139	2100	2.1	1989	1.989	23	52.2	245_1	245
662	11.0333	11.2	140	2098	2.098	1968	1.968	24	50.9	245_1	245
665	11.0833	11.3	141	2163	2.163	2034	2.034	23	53.1	245_1	245
668	11.1333	11.3	141	2183	2.183	2068	2.068	23	54.4	245_1	245
670	11.1667	11.4	142	2180	2.18	2085	2.085	23	54.9	245_1	245
673	11.2167	11.4	142	2201	2.201	2110	2.11	23	55.9	245_1	245
676	11.2667	11.5	143	2197	2.197	2125	2.125	23	57.3	245_1	245
679	11.3167	11.5	143	2233	2.233	2146	2.146	23	57.7	245_1	245
681	11.35	11.6	144	2296	2.296	2191	2.191	23	58.8	245_1	245
684	11.4	11.6	144	2269	2.269	2189	2.189	23	58.5	245_1	245
687	11.45	11.6	145	2308	2.308	2229	2.229	23	59.5	245_1	245
689	11.4833	11.7	142	2332	2.332	2258	2.258	24	60.8	245_1	245
692	11.5333	11.7	139	2344	2.344	2270	2.27	24	60.7	245_1	245
694	11.5667	11.8	139	2294	2.294	2255	2.255	23	60.8	245_1	245
697	11.6167	11.8	140	2272	2.272	2246	2.246	23	60.5	245_1	245
700	11.6667	11.9	132	2248	2.248	2214	2.214	23	59.3	245_1	245
702	11.7	11.9	135	2248	2.248	2217	2.217	23	59.4	245_1	245
705	11.75	12	135	2221	2.221	2185	2.185	23	58.7	245_1	245
707	11.7833	12	142	2164	2.164	2141	2.141	22	58.1	245_1	245
709	11.8167	12	145	2109	2.109	2083	2.083	24	56.9	245_1	245
711	11.85	12.1	145	2032	2.032	1990	1.99	25	54.2	245_1	245
713	11.8833	12.1	139	2031	2.031	1989	1.989	25	54.2	245_1	245
716	11.9333	12.1	139	1995	1.995	1921	1.921	24	52.5	245_1	245
719	11.9833	12.2	136	2007	2.007	1888	1.888	24	51.1	245_1	245
721	12.0167	12.2	137	2118	2.118	1931	1.931	26	50.4	245_1	245
724	12.0667	12.3	137	2157	2.157	1966	1.966	24	51.7	245_1	245
726	12.1	12.3	138	2206	2.206	2000	2	23	51.9	245_1	245
729	12.15	12.4	139	2322	2.322	2109	2.109	24	54.5	245_1	245
732	12.2	12.4	145	2299	2.299	2106	2.106	23	55.1	245_1	245
734	12.2333	12.4	149	2347	2.347	2145	2.145	25	55.5	245_1	245
737	12.2833	12.5	149	2332	2.332	2138	2.138	24	55.5	245_1	245
740	12.3333	12.5	146	2220	2.22	2044	2.044	23	53.5	245_1	245
742	12.3667	12.6	140	2332	2.332	2138	2.138	24	55.5	245_1	245
744	12.4	12.6	137	2438	2.438	2228	2.228	24	57.2	245_1	245
747	12.45	12.7	133	2455	2.455	2242	2.242	24	57.2	245_1	245
750	12.5	12.7	130	2451	2.451	2234	2.234	24	56.8	245_1	245
752	12.5333	12.7	130	2486	2.486	2278	2.278	23	58.2	245_1	245
755	12.5833	12.8	130	2558	2.558	2369	2.369	23	61.1	245_1	245
757	12.6167	12.8	136	2572	2.572	2397	2.397	24	61.9	245_1	245
760	12.6667	12.9	140	2501	2.501	2377	2.377	23	63	245_1	245
763	12.7167	12.9	144	2457	2.457	2330	2.33	23	61.4	245_1	245
765	12.75	13	147	2391	2.391	2293	2.293	23	60.6	245_1	245
768	12.8	13	147	2389	2.389	2311	2.311	23	61.3	245_1	245
770	12.8333	13	151	2372	2.372	2301	2.301	23	60.8	245_1	245
773	12.8833	13.1	151	2325	2.325	2241	2.241	23	58.8	245_1	245
776	12.9333	13.1	151	2288	2.288	2198	2.198	23	57.4	245_1	245
779	12.9833	13.2	151	2288	2.288	2198	2.198	23	57.4	245_1	245
781	13.0167	13.2	151	2386	2.386	2256	2.256	22	58.1	245_1	245
783	13.05	13.3	151	2321	2.321	2149	2.149	22	54.7	245_1	245
785	13.0833	13.3	151	2388	2.388	2184	2.184	22	55.4	245_1	245
788	13.1333	13.3	151	2452	2.452	2245	2.245	22	57.2	245_1	245
792	13.2	13.4	151	2403	2.403	2166	2.166	21	54.1	245_1	245
795	13.25	13.5	151	2492	2.492	2281	2.281	21	57.7	245_1	245
797	13.2833	13.5	152	2462	2.462	2276	2.276	21	57.8	245_1	245
799	13.3167	13.5	152	2468	2.468	2278	2.278	21	57.4	245_1	245
802	13.3667	13.6	152	2615	2.615	2448	2.448	23	62.6	245_1	245
805	13.4167	13.6	152	2571	2.571	2447	2.447	23	62.6	245_1	245
807	13.45	13.7	152	2519	2.519	2408	2.408	23	61.3	245_1	245
810	13.5	13.7	153	2546	2.546	2440	2.44	23	62.2	245_1	245
813	13.55	13.8	153	2582	2.582	2500	2.5	24	63.3	245_1	245
815	13.5833	13.8	154	2560	2.56	2498	2.498	23	64.1	245_1	245
818	13.6333	13.8	151	2549	2.549	2490	2.49	24	63.7	245_1	245
820	13.6667	13.9	154	2549	2.549	2490	2.49	24	63.7	245_1	245
822	13.7	13.9	151	2598	2.598	2522	2.522	25	65.4	245_1	245
824	13.7333	13.9	148	2612	2.612	2533	2.533	28	66.4	245_1	245
826	13.7667	14	148	2638	2.638	2557	2.557	29	66.9	245_1	245
829	13.8167	14	148	2628	2.628	2573	2.573	29	68.8	245_1	245
831	13.85	14.1	148	2629	2.629	2574	2.574	29	68.8	245_1	245
834	13.9	14.1	152	2592	2.592	2574	2.574	27	69.2	245_1	245
837	13.95	14.2	151	2533	2.533	2527	2.527	26	66.9	245_1	245
839	13.9833	14.2	155	2533	2.533	2527	2.527	26	66.9	245_1	245
841	14.0167	14.2	155	2613	2.613	2583	2.583	25	66.6	245_1	245
843	14.05	14.3	149	2630	2.63	2599	2.599	26	67.7	245_1	245
845	14.0833	14.3	148	2623	2.623	2573	2.573	27	67.5	245_1	245
847	14.1167	14.3	149	2682	2.682	2635	2.635	28	70.1	245_1	245
849	14.15	14.4	145	2685	2.685	2679	2.679	29	71.8	245_1	245
852	14.2	14.4	146	2685	2.685	2679	2.679	29	71.8	245_1	245
853	14.2167	14.4	146	2610	2.61	2625	2.625	30	70.8	245_1	245
856	14.2667	14.5	152	2567	2.567	2565	2.565	28	68.3	245_1	245
858	14.3	14.5	156	2501	2.501	2508	2.508	27	66.6	245_1	245
860	14.3333	14.5	156	2516	2.516	2528	2.528	28	66	245_1	245
863	14.3833	14.6	156	2480	2.48	2484	2.484	26	64.3	245_1	245
865	14.4167	14.6	156	2513	2.513	2478	2.478	28	63.5	245_1	245
867	14.45	14.7	156	2573	2.573	2550	2.55	28	66.1	245_1	245
870	14.5	14.7	157	2635	2.635	2602	2.602	27	67.5	245_1	245
872	14.5333	14.7	157	2617	2.617	2599	2.599	28	68.3	245_1	245
874	14.5667	14.8	158	2617	2.617	2609	2.609	27	68.5	245_1	245
877	14.6167	14.8	158	2606	2.606	2604	2.604	26	67.5	245_1	245
879	14.65	14.9	159	2692	2.692	2668	2.668	28	68.6	245_1	245
881	14.6833	14.9	159	2628	2.628	2611	2.611	28	67.3	245_1	245
883	14.7167	14.9	159	2554	2.554	2546	2.546	27	65.9	245_1	245
885	14.75	15	159	2555	2.555	2546	2.546	27	65.9	245_1	245
887	14.7833	15	159	2628	2.628	2606	2.606	27	66.3	245_1	245
889	14.8167	15	160	2706	2.706	2689	2.689	28	68	245_1	245
891	14.85	15.1	160	2758	2.758	2741	2.741	29	70	245_1	245
894	14.9	15.1	160	2660	2.66	2638	2.638	28	67.3	245_1	245
895	14.9167	15.1	160	2765	2.765	2754	2.754	29	70.3	245_1	245
898	14.9667	15.2	160	2806	2.806	2802	2.802	28	71.5	245_1	245
900	15	15.2	161	2748	2.748	2765	2.765	27	71.1	245_1	245
902	15.0333	15.3	161	2762	2.762	2783	2.783	27	72.1	245_1	245
904	15.0667	15.3	161	2737	2.737	2747	2.747	27	71.4	245_1	245
907	15.1167	15.3	161	2729	2.729	2741	2.741	26	71.8	245_1	245
909	15.15	15.4	161	2730	2.73	2741	2.741	26	71.8	245_1	245
911	15.1833	15.4	161	2715	2.715	2735	2.735	27	71.1	245_1	245
913	15.2167	15.4	162	2719	2.719	2757	2.757	28	72.8	245_1	245
915	15.25	15.5	162	2714	2.714	2770	2.77	29	73.8	245_1	245
917	15.2833	15.5	163	2714	2.714	2770	2.77	29	73.8	245_1	245
919	15.3167	15.5	163	2789	2.789	2863	2.863	29	76.7	245_1	245
921	15.35	15.6	163	2793	2.793	2900	2.9	29	77.8	245_1	245
923	15.3833	15.6	164	2848	2.848	2957	2.957	31	79	245_1	245
925	15.4167	15.6	164	2787	2.787	2921	2.921	30	78.8	245_1	245
927	15.45	15.7	164	2818	2.818	2962	2.962	31	79.3	245_1	245
929	15.4833	15.7	164	2874	2.874	3015	3.015	31	80	245_1	245
931	15.5167	15.7	164	2849	2.849	3004	3.004	31	79.5	245_1	245
933	15.55	15.8	160	2849	2.849	3003	3.003	31	79.5	245_1	245
935	15.5833	15.8	160	2840	2.84	3005	3.005	32	80.1	245_1	245
937	15.6167	15.8	160	2850	2.85	3016	3.016	32	80.9	245_1	245
939	15.65	15.9	160	2821	2.821	3029	3.029	32	82.8	245_1	245
940	15.6667	15.9	160	2823	2.823	3033	3.033	31	82.3	245_1	245
942	15.7	15.9	160	2813	2.813	3044	3.044	31	83	245_1	245
944	15.7333	16	164	2745	2.745	2990	2.99	32	82	245_1	245
946	15.7667	16	164	2743	2.743	3004	3.004	32	82.5	245_1	245
948	15.8	16	164	2743	2.743	2976	2.976	31	80.8	245_1	245
950	15.8333	16	164	2733	2.733	2927	2.927	31	78.8	245_1	245
952	15.8667	16.1	164	2683	2.683	2863	2.863	31	76.1	245_1	245
954	15.9	16.1	164	2743	2.743	2911	2.911	33	76.5	245_1	245
955	15.9167	16.1	161	2782	2.782	2936	2.936	33	77.2	245_1	245
956	15.9333	16.2	157	2930	2.93	3039	3.039	37	80	245_1	245
958	15.9667	16.2	154	2929	2.929	3056	3.056	39	81.7	245_1	245
960	16	16.2	154	2957	2.957	3149	3.149	39	85.6	245_1	245
961	16.0167	16.2	154	2924	2.924	3173	3.173	43	87.1	245_1	245
962	16.0333	16.2	154	3011	3.011	3274	3.274	43	90.7	245_1	245
963	16.05	16.3	158	3003	3.003	3314	3.314	42	93.7	245_1	245
965	16.0833	16.3	162	2907	2.907	3277	3.277	41	94.4	245_1	245
967	16.1167	16.3	166	2830	2.83	3194	3.194	37	91.4	245_1	245
968	16.1333	16.4	167	2757	2.757	3126	3.126	37	89.1	245_1	245
970	16.1667	16.4	167	2682	2.682	3033	3.033	39	86.5	245_1	245
972	16.2	16.4	167	2728	2.728	3059	3.059	36	86.3	245_1	245
973	16.2167	16.4	168	2700	2.7	3024	3.024	36	84	245_1	245
975	16.25	16.5	168	2700	2.7	3024	3.024	36	84	245_1	245
977	16.2833	16.5	168	2645	2.645	2944	2.944	37	80.8	245_1	245
978	16.3	16.5	158	2715	2.715	3013	3.013	38	81.6	245_1	245
979	16.3167	16.5	155	2821	2.821	3140	3.14	38	85.7	245_1	245
981	16.35	16.6	155	2887	2.887	3213	3.213	35	87.4	245_1	245
983	16.3833	16.6	155	2930	2.93	3283	3.283	38	90.2	245_1	245
984	16.4	16.6	156	2955	2.955	3311	3.311	38	92.9	245_1	245
985	16.4167	16.6	156	2952	2.952	3318	3.318	41	95.2	245_1	245
987	16.45	16.7	166	2986	2.986	3395	3.395	45	99.9	245_1	245
988	16.4667	16.7	166	2953	2.953	3376	3.376	43	98.7	245_1	245
990	16.5	16.7	166	2916	2.916	3369	3.369	44	98.7	245_1	245
991	16.5167	16.7	166	2910	2.91	3366	3.366	43	99	245_1	245
992	16.5333	16.8	166	2859	2.859	3338	3.338	43	99.3	245_1	245
994	16.5667	16.8	166	2850	2.85	3349	3.349	43	99.5	245_1	245
995	16.5833	16.8	166	2818	2.818	3331	3.331	43	99.2	245_1	245
997	16.6167	16.8	166	2818	2.818	3331	3.331	43	99.2	245_1	245
998	16.6333	16.8	170	2800	2.8	3316	3.316	46	98.9	245_1	245
999	16.65	16.9	170	2818	2.818	3341	3.341	45	99.6	245_1	245
1001	16.6833	16.9	166	2901	2.901	3431	3.431	43	100.3	245_1	245
1002	16.7	16.9	162	2925	2.925	3476	3.476	42	101.9	245_1	245
1003	16.7167	16.9	159	2943	2.943	3522	3.522	42	104.3	245_1	245
1005	16.75	17	156	2936	2.936	3510	3.51	42	103.6	245_1	245
1007	16.7833	17	156	2926	2.926	3451	3.451	41	100.4	245_1	245
1008	16.8	17	156	2959	2.959	3467	3.467	41	99.8	245_1	245
1010	16.8333	17	159	3010	3.01	3542	3.542	41	102	245_1	245
1011	16.85	17.1	163	2997	2.997	3509	3.509	41	102.5	245_1	245
1012	16.8667	17.1	167	3033	3.033	3549	3.549	42	103.5	245_1	245
1014	16.9	17.1	171	3028	3.028	3536	3.536	41	103.3	245_1	245
1015	16.9167	17.1	171	3025	3.025	3560	3.56	42	105.7	245_1	245
1016	16.9333	17.1	171	3010	3.01	3613	3.613	47	111.8	245_1	245
1017	16.95	17.2	172	3011	3.011	3614	3.614	47	111.8	245_1	245
1019	16.9833	17.2	172	3004	3.004	3603	3.603	46	112.1	245_1	245
1020	17	17.2	172	2976	2.976	3610	3.61	46	111.8	245_1	245
1021	17.0167	17.2	172	2931	2.931	3564	3.564	46	110.4	245_1	245
1023	17.05	17.3	172	2925	2.925	3566	3.566	47	110.3	245_1	245
1024	17.0667	17.3	165	2951	2.951	3626	3.626	47	112.3	245_1	245
1025	17.0833	17.3	161	2934	2.934	3613	3.613	47	112.8	245_1	245
1026	17.1	17.3	155	2965	2.965	3658	3.658	47	114.7	245_1	245
1028	17.1333	17.3	155	2952	2.952	3647	3.647	47	114.1	245_1	245
1030	17.1667	17.4	155	2933	2.933	3604	3.604	47	113.1	245_1	245
1031	17.1833	17.4	155	2964	2.964	3649	3.649	47	115	245_1	245
1033	17.2167	17.4	162	3059	3.059	3688	3.688	45	113.9	245_1	245
1034	17.2333	17.4	169	3100	3.1	3694	3.694	44	113.6	245_1	245
1035	17.25	17.5	174	3165	3.165	3771	3.771	44	115.2	245_1	245
1037	17.2833	17.5	174	3174	3.174	3766	3.766	45	115.4	245_1	245
1038	17.3	17.5	174	3184	3.184	3781	3.781	45	116.2	245_1	245
1039	17.3167	17.5	174	3184	3.184	3781	3.781	45	116.2	245_1	245
1041	17.35	17.6	174	3133	3.133	3733	3.733	44	115	245_1	245
1042	17.3667	17.6	174	3018	3.018	3683	3.683	46	116.3	245_1	245
1043	17.3833	17.6	174	2982	2.982	3677	3.677	47	117.2	245_1	245
1044	17.4	17.6	167	2982	2.982	3677	3.677	47	117.2	245_1	245
1046	17.4333	17.6	162	2985	2.985	3702	3.702	47	117.2	245_1	245
1047	17.45	17.7	160	2967	2.967	3691	3.691	47	116.5	245_1	245
1048	17.4667	17.7	157	2960	2.96	3665	3.665	47	115.7	245_1	245
1050	17.5	17.7	157	2960	2.96	3665	3.665	47	115.7	245_1	245
1051	17.5167	17.7	158	2972	2.972	3713	3.713	47	117.4	245_1	245
1052	17.5333	17.7	165	2936	2.936	3689	3.689	46	116.4	245_1	245
1053	17.55	17.8	170	2856	2.856	3621	3.621	47	116.7	245_1	245
1055	17.5833	17.8	173	2869	2.869	3611	3.611	47	115.7	245_1	245
1056	17.6	17.8	176	2866	2.866	3636	3.636	47	117.1	245_1	245
1057	17.6167	17.8	176	2867	2.867	3664	3.664	47	117.8	245_1	245
1058	17.6333	17.9	176	2921	2.921	3709	3.709	47	117.1	245_1	245
1060	17.6667	17.9	176	2934	2.934	3700	3.7	47	116.4	245_1	245
1061	17.6833	17.9	176	2967	2.967	3734	3.734	47	117.2	245_1	245
1062	17.7	17.9	176	2967	2.967	3734	3.734	47	117.2	245_1	245
1064	17.7333	17.9	176	2966	2.966	3728	3.728	47	117.2	245_1	245
1065	17.75	18	172	2966	2.966	3728	3.728	47	117.2	245_1	245
1066	17.7667	18	165	2977	2.977	3748	3.748	47	117.5	245_1	245
1067	17.7833	18	165	2984	2.984	3764	3.764	47	118.2	245_1	245
1069	17.8167	18	166	2981	2.981	3757	3.757	47	117.4	245_1	245
1070	17.8333	18	165	2956	2.956	3719	3.719	47	117	245_1	245
1071	17.85	18.1	166	2966	2.966	3740	3.74	47	117.7	245_1	245
1072	17.8667	18.1	169	2981	2.981	3758	3.758	47	118	245_1	245
1074	17.9	18.1	177	2960	2.96	3735	3.735	47	118	245_1	245
1075	17.9167	5	177	2946	2.946	3724	3.724	47	119.2	245_1	245
1076	17.9333	5	178	2936	2.936	3705	3.705	47	118.8	245_1	245
1078	17.9667	5	177	2916	2.916	3686	3.686	47	117.8	245_1	245
1079	17.9833	5	177	2956	2.956	3713	3.713	46	117.6	245_1	245
1081	18.0167	5	177	2910	2.91	3661	3.661	45	115.6	245_1	245
1082	18.0333	5	176	2883	2.883	3597	3.597	44	111.3	245_1	245
1084	18.0667	5	176	2853	2.853	3538	3.538	41	107.8	245_1	245
1085	18.0833	5	175	2833	2.833	3504	3.504	39	105.3	245_1	245
1087	18.1167	5	174	2755	2.755	3421	3.421	38	102.8	245_1	245
1089	18.15	5	174	2739	2.739	3385	3.385	37	101.1	245_1	245
1090	18.1667	5	169	2739	2.739	3385	3.385	37	101.1	245_1	245
1092	18.2	5	168	2715	2.715	3360	3.36	36	99.9	245_1	245
1094	18.2333	5	168	2714	2.714	3360	3.36	36	99.9	245_1	245
1096	18.2667	5	166	2674	2.674	3303	3.303	37	97.8	245_1	245
1097	18.2833	5	166	2686	2.686	3316	3.316	37	98	245_1	245
1099	18.3167	5	165	2753	2.753	3365	3.365	38	98.7	245_1	245
1101	18.35	5	167	2759	2.759	3381	3.381	38	99.2	245_1	245
1102	18.3667	5	167	2700	2.7	3347	3.347	38	98.7	245_1	245
1104	18.4	5	166	2650	2.65	3315	3.315	38	98.7	245_1	245
1106	18.4333	5	165	2579	2.579	3264	3.264	37	97.4	245_1	245
1107	18.45	5	164	2679	2.679	3391	3.391	38	102.6	245_1	245
1109	18.4833	5	163	2513	2.513	3276	3.276	38	101.5	245_1	245
1111	18.5167	5	162	2460	2.46	3227	3.227	36	99.3	245_1	245
1113	18.55	5	161	2361	2.361	3126	3.126	35	96.2	245_1	245
1114	18.5667	5	161	2281	2.281	3043	3.043	35	93.5	245_1	245
1116	18.6	5	160	2213	2.213	2976	2.976	33	91.3	245_1	245
1119	18.65	5	159	2210	2.21	2910	2.91	32	87.5	245_1	245
1121	18.6833	5	159	2177	2.177	2818	2.818	31	82.9	245_1	245
1122	18.7	5	158	2168	2.168	2770	2.77	32	80.4	245_1	245
1124	18.7333	5	158	2122	2.122	2693	2.693	32	78.3	245_1	245
1125	18.75	5	157	2143	2.143	2715	2.715	33	78.5	245_1	245
1127	18.7833	5	156	2098	2.098	2662	2.662	34	78.7	245_1	245
1129	18.8167	5	156	2098	2.098	2663	2.663	34	78.7	245_1	245
1131	18.85	5	155	1998	1.998	2619	2.619	36	81.9	245_1	245
1133	18.8833	5	154	1912	1.912	2522	2.522	34	79.5	245_1	245
1135	18.9167	5	150	1946	1.946	2582	2.582	33	81.3	245_1	245
1137	18.95	5	147	1972	1.972	2645	2.645	33	84.5	245_1	245
1138	18.9667	5	146	1910	1.91	2583	2.583	34	84.1	245_1	245
1140	19	5	145	1900	1.9	2554	2.554	34	83.6	245_1	245
1142	19.0333	5	144	1780	1.78	2374	2.374	30	77.2	245_1	245
1144	19.0667	5	143	1794	1.794	2413	2.413	33	80.1	245_1	245
1146	19.1	5	146	1889	1.889	2504	2.504	36	82	245_1	245
1147	19.1167	5	148	1703	1.703	2240	2.24	32	73.5	245_1	245
1148	19.1333	5	148	1684	1.684	2217	2.217	34	71.6	245_1	245
1150	19.1667	5	148	1683	1.683	2216	2.216	34	71.6	245_1	245
1152	19.2	5	148	1631	1.631	2108	2.108	32	66.7	245_1	245
1154	19.2333	5	147	1729	1.729	2177	2.177	34	66.2	245_1	245
1155	19.25	5	146	1641	1.641	2056	2.056	35	64.2	245_1	245
1159	19.3167	5	145	1571	1.571	1988	1.988	39	64.4	245_1	245
1160	19.3333	5	145	1728	1.728	2109	2.109	35	63.7	245_1	245
1162	19.3667	5	144	1775	1.775	2156	2.156	32	66.3	245_1	245
1166	19.4333	5	143	1774	1.774	2122	2.122	27	64.4	245_1	245
1167	19.45	5	143	1794	1.794	2148	2.148	28	65.4	245_1	245
1169	19.4833	5	142	1829	1.829	2199	2.199	30	68.7	245_1	245
1171	19.5167	5	141	1850	1.85	2228	2.228	29	69.3	245_1	245
1172	19.5333	5	140	1850	1.85	2228	2.228	29	69.3	245_1	245
1176	19.6	5	140	1788	1.788	2200	2.2	30	71.1	245_1	245
1177	19.6167	5	139	1662	1.662	2048	2.048	36	66.8	245_1	245
1179	19.65	5	138	1681	1.681	2026	2.026	36	65.2	245_1	245
1181	19.6833	5	138	1710	1.71	2054	2.054	38	66.3	245_1	245
1182	19.7	5	138	1730	1.73	2054	2.054	37	66.1	245_1	245
1184	19.7333	5	138	1730	1.73	2036	2.036	38	65.7	245_1	245
1185	19.75	5	138	1748	1.748	2053	2.053	38	66.3	245_1	245
1187	19.7833	5	138	1805	1.805	2146	2.146	39	71.7	245_1	245
1189	19.8167	5	137	1806	1.806	2180	2.18	34	73.4	245_1	245
1191	19.85	5	137	1754	1.754	2168	2.168	34	74.5	245_1	245
1193	19.8833	5	136	1721	1.721	2156	2.156	33	74.9	245_1	245
1194	19.9	5	136	1687	1.687	2097	2.097	39	72.7	245_1	245
1196	19.9333	5	136	1674	1.674	2086	2.086	39	72.1	245_1	245
1197	19.95	5	135	1584	1.584	1976	1.976	38	68.5	245_1	245
1199	19.9833	5	135	1553	1.553	1921	1.921	38	66.2	245_1	245
1200	20	5	135	1511	1.511	1844	1.844	38	63.4	245_1	245
1202	20.0333	5	135	1581	1.581	1911	1.911	39	64.9	245_1	245
1203	20.05	5	134	1578	1.578	1906	1.906	40	64.8	245_1	245
1205	20.0833	5	134	1609	1.609	1908	1.908	40	64.5	245_1	245
1207	20.1167	5	133	1541	1.541	1816	1.816	37	62.2	245_1	245
1209	20.15	5	133	1575	1.575	1877	1.877	35	63.7	245_1	245
1210	20.1667	5	133	1527	1.527	1812	1.812	33	62.6	245_1	245
1213	20.2167	5	132	1477	1.477	1773	1.773	35	62.1	245_1	245
1215	20.25	5	132	1460	1.46	1725	1.725	34	60	245_1	245
1218	20.3	5	132	1478	1.478	1726	1.726	29	59.2	245_1	245
1220	20.3333	5	132	1438	1.438	1698	1.698	32	58.9	245_1	245
1222	20.3667	5	132	1510	1.51	1760	1.76	29	59.4	245_1	245
1224	20.4	5	132	1468	1.468	1703	1.703	31	57.9	245_1	245
1227	20.45	5	132	1422	1.422	1643	1.643	27	55.6	245_1	245
1229	20.4833	5	132	1528	1.528	1728	1.728	26	57	245_1	245
1232	20.5333	5	131	1561	1.561	1778	1.778	26	59.3	245_1	245
1234	20.5667	5	131	1529	1.529	1772	1.772	27	60.2	245_1	245
1236	20.6	5	130	1516	1.516	1777	1.777	27	61.2	245_1	245
1238	20.6333	5	130	1453	1.453	1724	1.724	28	60	245_1	245
1240	20.6667	5	129	1464	1.464	1754	1.754	28	61.3	245_1	245
1242	20.7	5	129	1455	1.455	1753	1.753	27	61.4	245_1	245
1245	20.75	5	129	1388	1.388	1738	1.738	30	63.2	245_1	245
1247	20.7833	5	128	1346	1.346	1680	1.68	30	59.7	245_1	245
1250	20.8333	5	128	1338	1.338	1653	1.653	28	57.4	245_1	245
1253	20.8833	5	127	1283	1.283	1563	1.563	25	53.5	245_1	245
1255	20.9167	5	127	1287	1.287	1570	1.57	24	53.5	245_1	245
1257	20.95	5	126	1273	1.273	1546	1.546	24	52.5	245_1	245
1259	20.9833	5	125	1236	1.236	1508	1.508	25	52.2	245_1	245
1261	21.0167	5	124	1236	1.236	1508	1.508	25	52.2	245_1	245
1262	21.0333	5	123	1245	1.245	1520	1.52	25	53	245_1	245
1264	21.0667	0	122	1173	1.173	1424	1.424	27	50.6	245_1	245
1265	21.0833	0	119	1158	1.158	1392	1.392	32	49.7	245_1	245
1269	21.15	0	118	1026	1.026	1191	1.191	28	42.2	245_1	245
1271	21.1833	0	118	895	0.895	1024	1.024	28	37.2	245_1	245
1272	21.2	0	119	901	0.901	1007	1.007	29	36.5	245_1	245
1274	21.2333	0	118	974	0.974	1089	1.089	28	38.7	245_1	245
1276	21.2667	0	118	973	0.973	1088	1.088	28	38.7	245_1	245
1279	21.3167	0	120	969	0.969	1113	1.113	25	40.9	245_1	245
1281	21.35	0	120	860	0.86	999	0.999	25	37.8	245_1	245
1284	21.4	0	120	898	0.898	1056	1.056	28	40.3	245_1	245
1287	21.45	0	119	1036	1.036	1195	1.195	24	44.8	245_1	245
1289	21.4833	0	118	989	0.989	1144	1.144	23	43.7	245_1	245
1294	21.5667	0	117	919	0.919	1079	1.079	19	42	245_1	245
1296	21.6	0	116	829	0.829	989	0.989	20	39.3	245_1	245
1299	21.65	0	115	798	0.798	928	0.928	21	36.6	245_1	245
1302	21.7	0	114	829	0.829	957	0.957	19	37.5	245_1	245
1306	21.7667	0	113	772	0.772	897	0.897	20	36.3	245_1	245
1309	21.8167	0	111	751	0.751	866	0.866	19	34.9	245_1	245
1312	21.8667	0	110	739	0.739	850	0.85	19	34.2	245_1	245
1316	21.9333	0	109	698	0.698	785	0.785	20	31	245_1	245
1320	22	0	109	740	0.74	825	0.825	18	32.1	245_1	245
1324	22.0667	0	108	696	0.696	784	0.784	16	30.8	245_1	245
1328	22.1333	0	107	690	0.69	788	0.788	16	31.4	245_1	245
1332	22.2	0	108	705	0.705	815	0.815	16	32.6	245_1	245
1336	22.2667	0	108	653	0.653	758	0.758	15	30.4	245_1	245
1340	22.3333	0	109	594	0.594	701	0.701	15	28.4	245_1	245
1344	22.4	0	108	624	0.624	734	0.734	15	29.6	245_1	245
1348	22.4667	0	107	585	0.585	684	0.684	15	27.6	245_1	245
1356	22.6	0	108	588	0.588	671	0.671	15	26.5	245_1	245
1361	22.6833	0	109	548	0.548	620	0.62	14	24.5	245_1	245
1366	22.7667	0	107	562	0.562	627	0.627	14	24.4	245_1	245
1370	22.8333	0	107	639	0.639	701	0.701	14	27.6	245_1	245
1373	22.8833	0	106	687	0.687	768	0.768	15	31	245_1	245
