# Supplementary material for: On the development of diagnostic support algorithms based on CPET biosignals data via machine learning and wavelets
Source: PeerJ journal article supplement (doi:10.7717/peerj-cs.2474), 2025-01-30
Supplement: raw_data.zip [file Subject_38.xlsx]

## Sheet: Folha1
time	time	Speed	HR	VO2	VO2	VCO2	VCO2	RR	VE	ID_test	ID
	min	km/h	/min	ml/min	L/min	ml/min	L/min	/min	L/min
0	0	4.9	46	536	0.536	445	0.445	33	18.8	597_1	597
2	0.0333333	4.9	46	477	0.477	370	0.37	38	17	597_1	597
6	0.1	4.9	83	530	0.53	443	0.443	33	18.8	597_1	597
9	0.15	4.9	87	688	0.688	540	0.54	21	19.3	597_1	597
12	0.2	4.9	87	792	0.792	618	0.618	21	21.9	597_1	597
15	0.25	4.9	78	837	0.837	654	0.654	21	23	597_1	597
17	0.283333	4.9	68	848	0.848	659	0.659	22	23.5	597_1	597
20	0.333333	4.9	65	948	0.948	721	0.721	20	24.6	597_1	597
24	0.4	4.9	76	1024	1.024	797	0.797	20	27.5	597_1	597
26	0.433333	4.9	77	1040	1.04	808	0.808	20	27.6	597_1	597
29	0.483333	4.9	77	1045	1.045	811	0.811	20	28	597_1	597
31	0.516667	4.9	88	1072	1.072	835	0.835	20	29	597_1	597
34	0.566667	4.9	98	1125	1.125	853	0.853	20	29.5	597_1	597
37	0.616667	4.9	102	1162	1.162	870	0.87	20	30	597_1	597
40	0.666667	4.9	103	1227	1.227	887	0.887	20	30.1	597_1	597
42	0.7	4.9	103	1290	1.29	880	0.88	23	29.8	597_1	597
44	0.733333	4.9	103	1400	1.4	937	0.937	23	31.4	597_1	597
46	0.766667	4.9	87	1469	1.469	965	0.965	24	32.4	597_1	597
49	0.816667	4.9	86	1522	1.522	980	0.98	25	32.8	597_1	597
51	0.85	4.9	86	1561	1.561	1000	1	24	33.1	597_1	597
54	0.9	4.9	86	1608	1.608	1016	1.016	25	33.8	597_1	597
57	0.95	4.9	75	1607	1.607	1000	1	26	33.1	597_1	597
60	1	4.9	58	1655	1.655	1035	1.035	24	33.8	597_1	597
62	1.03333	4.9	58	1660	1.66	1050	1.05	23	33.8	597_1	597
67	1.11667	4.9	91	1643	1.643	1065	1.065	19	33.5	597_1	597
68	1.13333	4.9	91	1642	1.642	1065	1.065	19	33.5	597_1	597
71	1.18333	4.9	92	1661	1.661	1083	1.083	19	33.7	597_1	597
73	1.21667	4.9	92	1665	1.665	1087	1.087	20	33.8	597_1	597
75	1.25	4.9	103	1709	1.709	1116	1.116	20	34.4	597_1	597
78	1.3	4.9	103	1718	1.718	1123	1.123	21	34.8	597_1	597
80	1.33333	4.9	104	1755	1.755	1149	1.149	22	35.7	597_1	597
82	1.36667	4.9	104	1782	1.782	1131	1.131	28	35.9	597_1	597
84	1.4	4.9	94	1842	1.842	1187	1.187	27	37.1	597_1	597
87	1.45	4.9	80	1885	1.885	1228	1.228	27	38.7	597_1	597
89	1.48333	4.9	79	1877	1.877	1240	1.24	27	39.2	597_1	597
92	1.53333	4.9	69	1878	1.878	1262	1.262	26	39.5	597_1	597
94	1.56667	4.9	66	1832	1.832	1235	1.235	26	38.5	597_1	597
96	1.6	4.9	65	1756	1.756	1183	1.183	28	37.1	597_1	597
98	1.63333	4.9	65	1781	1.781	1201	1.201	27	37.4	597_1	597
100	1.66667	4.9	79	1735	1.735	1172	1.172	26	36.3	597_1	597
102	1.7	4.9	92	1665	1.665	1113	1.113	28	34.9	597_1	597
104	1.73333	4.9	91	1598	1.598	1064	1.064	29	33.7	597_1	597
108	1.8	4.9	99	1565	1.565	1042	1.042	29	33.2	597_1	597
110	1.83333	4.9	100	1572	1.572	1048	1.048	29	33.5	597_1	597
112	1.86667	4.9	99	1600	1.6	1070	1.07	27	33.4	597_1	597
114	1.9	4.9	97	1603	1.603	1074	1.074	26	33.3	597_1	597
118	1.96667	4.9	96	1571	1.571	1077	1.077	25	33.8	597_1	597
120	2	4.9	96	1559	1.559	1078	1.078	25	33.9	597_1	597
122	2.03333	4.9	97	1551	1.551	1091	1.091	24	34.2	597_1	597
124	2.06667	4.9	97	1565	1.565	1098	1.098	25	34.4	597_1	597
127	2.11667	4.9	96	1535	1.535	1097	1.097	24	34.5	597_1	597
129	2.15	4.9	95	1509	1.509	1100	1.1	25	35.2	597_1	597
131	2.18333	4.9	95	1495	1.495	1095	1.095	26	35.3	597_1	597
133	2.21667	4.9	95	1495	1.495	1095	1.095	26	35.3	597_1	597
135	2.25	4.9	93	1491	1.491	1106	1.106	27	35.8	597_1	597
137	2.28333	4.9	93	1492	1.492	1106	1.106	27	35.8	597_1	597
139	2.31667	4.9	93	1481	1.481	1103	1.103	27	35.9	597_1	597
141	2.35	4.9	93	1469	1.469	1097	1.097	28	35.9	597_1	597
143	2.38333	4.9	94	1467	1.467	1096	1.096	29	36.3	597_1	597
145	2.41667	4.9	95	1458	1.458	1092	1.092	31	36.7	597_1	597
147	2.45	4.9	94	1459	1.459	1092	1.092	31	36.7	597_1	597
149	2.48333	4.9	94	1437	1.437	1068	1.068	29	35.7	597_1	597
152	2.53333	4.9	94	1436	1.436	1067	1.067	29	35.7	597_1	597
154	2.56667	4.9	95	1447	1.447	1079	1.079	29	36.3	597_1	597
155	2.58333	4.9	95	1489	1.489	1096	1.096	30	36.9	597_1	597
159	2.65	4.9	96	1462	1.462	1100	1.1	26	36.9	597_1	597
161	2.68333	4.9	95	1412	1.412	1070	1.07	25	35.4	597_1	597
164	2.73333	4.9	96	1365	1.365	1040	1.04	24	34.1	597_1	597
166	2.76667	4.9	98	1374	1.374	1061	1.061	24	34.6	597_1	597
168	2.8	4.9	97	1399	1.399	1080	1.08	24	35.2	597_1	597
172	2.86667	4.9	97	1321	1.321	1039	1.039	23	33.8	597_1	597
174	2.9	4.9	98	1321	1.321	1039	1.039	23	33.8	597_1	597
176	2.93333	4.9	97	1316	1.316	1016	1.016	25	32.7	597_1	597
178	2.96667	4.9	97	1361	1.361	1043	1.043	26	33.7	597_1	597
181	3.01667	4.9	94	1385	1.385	1061	1.061	26	34.4	597_1	597
183	3.05	4.9	94	1365	1.365	1051	1.051	25	34.2	597_1	597
186	3.1	4.9	94	1364	1.364	1053	1.053	26	34.3	597_1	597
188	3.13333	4.9	92	1370	1.37	1059	1.059	25	34.5	597_1	597
190	3.16667	4.9	92	1350	1.35	1053	1.053	25	34.3	597_1	597
193	3.21667	4.9	92	1315	1.315	1045	1.045	26	34.3	597_1	597
197	3.28333	4.9	93	1263	1.263	1011	1.011	25	33.3	597_1	597
200	3.33333	4.9	95	1255	1.255	1008	1.008	23	32.5	597_1	597
202	3.36667	4.9	95	1220	1.22	980	0.98	23	31.5	597_1	597
205	3.41667	4.9	96	1218	1.218	976	0.976	23	31.2	597_1	597
208	3.46667	4.9	96	1174	1.174	940	0.94	22	30.1	597_1	597
210	3.5	4.9	96	1173	1.173	935	0.935	22	29.9	597_1	597
212	3.53333	4.9	97	1201	1.201	954	0.954	22	30.3	597_1	597
216	3.6	4.9	96	1234	1.234	994	0.994	21	31.5	597_1	597
218	3.63333	4.9	96	1196	1.196	965	0.965	23	31.3	597_1	597
220	3.66667	4.9	95	1193	1.193	955	0.955	24	31.3	597_1	597
222	3.7	4.9	95	1172	1.172	936	0.936	25	30.7	597_1	597
225	3.75	4.9	96	1191	1.191	957	0.957	23	31	597_1	597
227	3.78333	4.9	97	1211	1.211	970	0.97	23	31.4	597_1	597
229	3.81667	4.9	97	1211	1.211	970	0.97	23	31.4	597_1	597
232	3.86667	4.9	98	1225	1.225	977	0.977	25	31.9	597_1	597
234	3.9	4.9	98	1256	1.256	1006	1.006	25	32.8	597_1	597
237	3.95	4.9	98	1272	1.272	1037	1.037	25	33.9	597_1	597
239	3.98333	4.9	98	1275	1.275	1051	1.051	26	34.8	597_1	597
241	4.01667	4.9	97	1275	1.275	1052	1.052	26	34.8	597_1	597
242	4.03333	4.9	96	1254	1.254	1041	1.041	27	34.6	597_1	597
244	4.06667	4.9	96	1241	1.241	1025	1.025	28	34.4	597_1	597
246	4.1	4.9	96	1237	1.237	1011	1.011	30	34.3	597_1	597
248	4.13333	4.9	96	1207	1.207	978	0.978	31	33.4	597_1	597
250	4.16667	4.9	96	1196	1.196	969	0.969	30	32.9	597_1	597
252	4.2	4.9	95	1171	1.171	939	0.939	30	32	597_1	597
255	4.25	4.9	95	1171	1.171	939	0.939	30	32	597_1	597
258	4.3	4.9	95	1213	1.213	962	0.962	27	31.6	597_1	597
261	4.35	4.9	95	1187	1.187	939	0.939	23	30.2	597_1	597
264	4.4	4.9	95	1153	1.153	916	0.916	25	30.2	597_1	597
266	4.43333	4.9	95	1205	1.205	952	0.952	23	30.4	597_1	597
268	4.46667	4.9	95	1223	1.223	962	0.962	23	30.6	597_1	597
270	4.5	4.9	96	1258	1.258	983	0.983	23	31.1	597_1	597
272	4.53333	4.9	96	1289	1.289	1012	1.012	25	32.7	597_1	597
275	4.58333	4.9	96	1264	1.264	1007	1.007	26	33.3	597_1	597
277	4.61667	4.9	96	1258	1.258	1017	1.017	26	33.7	597_1	597
279	4.65	4.9	95	1259	1.259	1014	1.014	27	33.8	597_1	597
281	4.68333	4.9	94	1237	1.237	1013	1.013	26	33.9	597_1	597
284	4.73333	4.9	93	1212	1.212	1007	1.007	27	33.8	597_1	597
285	4.75	4.9	93	1192	1.192	993	0.993	28	33.7	597_1	597
287	4.78333	4.9	94	1164	1.164	969	0.969	29	33.2	597_1	597
290	4.83333	4.9	94	1135	1.135	944	0.944	29	32.4	597_1	597
293	4.88333	6.1	95	1144	1.144	942	0.942	29	32.1	597_1	597
294	4.9	6.1	96	1118	1.118	909	0.909	30	31.3	597_1	597
296	4.93333	6.1	97	1129	1.129	916	0.916	29	31.3	597_1	597
299	4.98333	6.1	98	1152	1.152	913	0.913	30	30.9	597_1	597
302	5.03333	6.1	99	1219	1.219	971	0.971	26	31.6	597_1	597
305	5.08333	6.1	100	1188	1.188	952	0.952	23	30.7	597_1	597
308	5.13333	6.1	101	1244	1.244	983	0.983	24	31.1	597_1	597
310	5.16667	6.1	102	1263	1.263	986	0.986	24	31.2	597_1	597
313	5.21667	6.1	101	1304	1.304	1019	1.019	24	31.8	597_1	597
315	5.25	6.1	101	1307	1.307	1029	1.029	23	32.2	597_1	597
321	5.35	6.1	101	1261	1.261	1008	1.008	18	30.7	597_1	597
324	5.4	6.1	101	1267	1.267	999	0.999	19	30.7	597_1	597
326	5.43333	6.1	102	1361	1.361	1040	1.04	24	32.5	597_1	597
328	5.46667	6.1	101	1418	1.418	1076	1.076	25	33.9	597_1	597
330	5.5	6.1	101	1471	1.471	1111	1.111	25	34.7	597_1	597
333	5.55	6.1	103	1493	1.493	1129	1.129	25	35.2	597_1	597
335	5.58333	6.1	104	1538	1.538	1160	1.16	25	36	597_1	597
337	5.61667	6.1	104	1526	1.526	1167	1.167	27	36.9	597_1	597
340	5.66667	6.1	103	1544	1.544	1181	1.181	26	37.1	597_1	597
342	5.7	6.1	103	1537	1.537	1192	1.192	26	37.7	597_1	597
344	5.73333	6.1	103	1559	1.559	1223	1.223	26	38.6	597_1	597
346	5.76667	6.1	104	1551	1.551	1226	1.226	25	38.8	597_1	597
349	5.81667	6.1	105	1554	1.554	1238	1.238	26	39	597_1	597
351	5.85	6.1	105	1562	1.562	1243	1.243	27	39.3	597_1	597
353	5.88333	6.1	107	1579	1.579	1255	1.255	27	39.6	597_1	597
356	5.93333	7	109	1568	1.568	1250	1.25	28	39.6	597_1	597
358	5.96667	7	110	1601	1.601	1258	1.258	28	39.1	597_1	597
361	6.01667	7	111	1600	1.6	1257	1.257	28	39.1	597_1	597
363	6.05	7	111	1679	1.679	1306	1.306	28	40	597_1	597
365	6.08333	7	111	1734	1.734	1355	1.355	28	41.4	597_1	597
367	6.11667	7	111	1751	1.751	1379	1.379	28	41.9	597_1	597
369	6.15	7	112	1753	1.753	1384	1.384	28	42.1	597_1	597
372	6.2	7	112	1791	1.791	1415	1.415	27	42.7	597_1	597
374	6.23333	7	113	1803	1.803	1440	1.44	27	44.1	597_1	597
376	6.26667	7	113	1764	1.764	1440	1.44	26	44.4	597_1	597
379	6.31667	7	113	1737	1.737	1428	1.428	26	44.2	597_1	597
381	6.35	7	114	1735	1.735	1424	1.424	25	43.6	597_1	597
383	6.38333	7	113	1776	1.776	1438	1.438	27	44	597_1	597
385	6.41667	7	113	1809	1.809	1450	1.45	27	44.4	597_1	597
387	6.45	7	113	1821	1.821	1448	1.448	28	44.5	597_1	597
390	6.5	7	113	1821	1.821	1448	1.448	28	44.5	597_1	597
392	6.53333	7	114	1882	1.882	1471	1.471	29	45	597_1	597
394	6.56667	7	114	1947	1.947	1511	1.511	29	45.6	597_1	597
396	6.6	7	113	1986	1.986	1541	1.541	31	46.7	597_1	597
398	6.63333	7	114	1992	1.992	1557	1.557	29	47.3	597_1	597
400	6.66667	7	114	2002	2.002	1579	1.579	28	47.9	597_1	597
402	6.7	7	115	1999	1.999	1581	1.581	28	48	597_1	597
406	6.76667	7	115	1991	1.991	1576	1.576	29	48.1	597_1	597
408	6.8	7	115	1983	1.983	1564	1.564	29	47.6	597_1	597
410	6.83333	7	115	2021	2.021	1589	1.589	30	47.8	597_1	597
412	6.86667	7	116	1992	1.992	1575	1.575	29	47.6	597_1	597
414	6.9	7	116	1999	1.999	1585	1.585	29	47.7	597_1	597
416	6.93333	8	116	1995	1.995	1563	1.563	30	47	597_1	597
418	6.96667	8	116	1931	1.931	1541	1.541	25	45.6	597_1	597
420	7	8	116	2054	2.054	1596	1.596	30	47.3	597_1	597
422	7.03333	8	117	2100	2.1	1629	1.629	29	47.9	597_1	597
425	7.08333	8	117	2122	2.122	1644	1.644	29	48.5	597_1	597
427	7.11667	8	117	2110	2.11	1632	1.632	29	48.2	597_1	597
429	7.15	8	118	2130	2.13	1640	1.64	30	48.4	597_1	597
431	7.18333	8	118	2168	2.168	1688	1.688	28	49.4	597_1	597
433	7.21667	8	119	2177	2.177	1707	1.707	28	49.8	597_1	597
435	7.25	8	119	2178	2.178	1707	1.707	28	49.8	597_1	597
437	7.28333	8	120	2191	2.191	1736	1.736	30	51.5	597_1	597
439	7.31667	8	120	2182	2.182	1738	1.738	30	51.8	597_1	597
441	7.35	8	120	2177	2.177	1751	1.751	29	52.7	597_1	597
443	7.38333	8	120	2164	2.164	1751	1.751	28	52.4	597_1	597
445	7.41667	8	120	2136	2.136	1738	1.738	28	51.9	597_1	597
447	7.45	8	120	2189	2.189	1776	1.776	29	52.9	597_1	597
449	7.48333	8	120	2136	2.136	1739	1.739	28	51.5	597_1	597
452	7.53333	8	120	2148	2.148	1744	1.744	27	51.1	597_1	597
454	7.56667	8	120	2135	2.135	1735	1.735	27	50.9	597_1	597
456	7.6	8	121	2164	2.164	1740	1.74	28	50.7	597_1	597
458	7.63333	8	121	2222	2.222	1781	1.781	28	52.2	597_1	597
460	7.66667	8	121	2252	2.252	1820	1.82	28	53.9	597_1	597
462	7.7	8	122	2203	2.203	1799	1.799	28	53.5	597_1	597
464	7.73333	8	122	2235	2.235	1820	1.82	29	53.9	597_1	597
467	7.78333	8	122	2230	2.23	1837	1.837	29	54.3	597_1	597
469	7.81667	8	122	2201	2.201	1821	1.821	29	53.9	597_1	597
471	7.85	8	123	2212	2.212	1841	1.841	28	54.2	597_1	597
473	7.88333	8	123	2212	2.212	1841	1.841	28	54.2	597_1	597
475	7.91667	8	123	2234	2.234	1850	1.85	28	54	597_1	597
477	7.95	9	123	2290	2.29	1892	1.892	28	55	597_1	597
478	7.96667	9	123	2330	2.33	1911	1.911	29	55.6	597_1	597
481	8.01667	9	123	2329	2.329	1930	1.93	28	56.7	597_1	597
482	8.03333	9	124	2333	2.333	1939	1.939	30	57.5	597_1	597
485	8.08333	9	124	2334	2.334	1940	1.94	30	57.5	597_1	597
486	8.1	9	125	2327	2.327	1936	1.936	31	58.2	597_1	597
488	8.13333	9	125	2321	2.321	1944	1.944	32	58.9	597_1	597
490	8.16667	9	126	2336	2.336	1971	1.971	32	59.9	597_1	597
492	8.2	9	126	2305	2.305	1959	1.959	32	59.5	597_1	597
494	8.23333	9	126	2283	2.283	1928	1.928	33	58.5	597_1	597
496	8.26667	9	127	2315	2.315	1947	1.947	34	59	597_1	597
497	8.28333	9	127	2351	2.351	1957	1.957	37	59.9	597_1	597
499	8.31667	9	127	2248	2.248	1907	1.907	33	57.8	597_1	597
501	8.35	9	127	2219	2.219	1874	1.874	33	56.4	597_1	597
503	8.38333	9	128	2154	2.154	1802	1.802	31	53.9	597_1	597
504	8.4	9	128	2186	2.186	1816	1.816	32	54.1	597_1	597
506	8.43333	9	128	2290	2.29	1814	1.814	39	54.2	597_1	597
508	8.46667	9	127	2330	2.33	1852	1.852	35	55.2	597_1	597
509	8.48333	9	127	2372	2.372	1882	1.882	35	56.3	597_1	597
511	8.51667	9	127	2426	2.426	1919	1.919	37	58.4	597_1	597
512	8.53333	9	127	2472	2.472	1991	1.991	38	61.3	597_1	597
514	8.56667	9	128	2489	2.489	2000	2	37	61.2	597_1	597
516	8.6	9	128	2443	2.443	1996	1.996	35	61.5	597_1	597
518	8.63333	9	128	2369	2.369	1950	1.95	37	60.7	597_1	597
519	8.65	9	128	2364	2.364	1945	1.945	37	60.3	597_1	597
522	8.7	9	128	2364	2.364	1945	1.945	37	60.3	597_1	597
523	8.71667	9	129	2383	2.383	1977	1.977	36	60.8	597_1	597
525	8.75	9	129	2434	2.434	1997	1.997	38	61.4	597_1	597
526	8.76667	9	129	2467	2.467	2011	2.011	41	62.3	597_1	597
528	8.8	9	129	2481	2.481	2064	2.064	36	63.2	597_1	597
529	8.81667	9	129	2492	2.492	2082	2.082	35	63.8	597_1	597
531	8.85	9	129	2516	2.516	2089	2.089	35	64.1	597_1	597
533	8.88333	9	129	2513	2.513	2065	2.065	40	64	597_1	597
535	8.91667	9	129	2519	2.519	2062	2.062	40	63.5	597_1	597
536	8.93333	10.1	130	2479	2.479	2060	2.06	37	63.4	597_1	597
538	8.96667	10.1	130	2476	2.476	2068	2.068	35	63	597_1	597
539	8.98333	10.1	130	2443	2.443	2049	2.049	35	62.3	597_1	597
541	9.01667	10.1	131	2392	2.392	2013	2.013	36	61.4	597_1	597
543	9.05	10.1	131	2392	2.392	2013	2.013	36	61.4	597_1	597
545	9.08333	10.1	132	2419	2.419	2042	2.042	36	62.2	597_1	597
546	9.1	10.1	132	2470	2.47	2080	2.08	36	63	597_1	597
548	9.13333	10.1	132	2520	2.52	2129	2.129	36	64.8	597_1	597
550	9.16667	10.1	132	2543	2.543	2159	2.159	36	66.1	597_1	597
551	9.18333	10.1	133	2607	2.607	2210	2.21	35	67.6	597_1	597
553	9.21667	10.1	134	2608	2.608	2210	2.21	35	67.6	597_1	597
555	9.25	10.1	135	2587	2.587	2209	2.209	36	68	597_1	597
557	9.28333	10.1	136	2583	2.583	2213	2.213	35	67.9	597_1	597
559	9.31667	10.1	136	2582	2.582	2231	2.231	34	68.1	597_1	597
560	9.33333	10.1	137	2573	2.573	2236	2.236	34	67.8	597_1	597
562	9.36667	10.1	137	2560	2.56	2229	2.229	34	67.5	597_1	597
564	9.4	10.1	138	2569	2.569	2233	2.233	34	67.4	597_1	597
566	9.43333	10.1	138	2601	2.601	2272	2.272	34	68.5	597_1	597
567	9.45	10.1	138	2633	2.633	2308	2.308	34	69.7	597_1	597
569	9.48333	10.1	138	2652	2.652	2338	2.338	35	71.1	597_1	597
571	9.51667	10.1	138	2620	2.62	2318	2.318	36	71	597_1	597
573	9.55	10.1	138	2626	2.626	2344	2.344	35	71.9	597_1	597
575	9.58333	10.1	138	2626	2.626	2344	2.344	35	71.9	597_1	597
576	9.6	10.1	138	2637	2.637	2336	2.336	35	71.4	597_1	597
578	9.63333	10.1	139	2652	2.652	2340	2.34	35	71.4	597_1	597
580	9.66667	10.1	139	2620	2.62	2316	2.316	35	70.7	597_1	597
582	9.7	10.1	139	2577	2.577	2292	2.292	33	69.5	597_1	597
583	9.71667	10.1	139	2616	2.616	2330	2.33	33	70	597_1	597
585	9.75	10.1	139	2654	2.654	2323	2.323	34	69.3	597_1	597
587	9.78333	10.1	139	2694	2.694	2343	2.343	35	69.8	597_1	597
589	9.81667	10.1	140	2669	2.669	2316	2.316	35	69.1	597_1	597
590	9.83333	10.1	140	2615	2.615	2283	2.283	33	68.3	597_1	597
592	9.86667	10.1	140	2649	2.649	2295	2.295	34	68	597_1	597
594	9.9	10.1	140	2704	2.704	2327	2.327	35	68.8	597_1	597
596	9.93333	11.1	140	2690	2.69	2317	2.317	35	68.7	597_1	597
597	9.95	11.1	140	2662	2.662	2313	2.313	36	68.7	597_1	597
599	9.98333	11.1	140	2615	2.615	2279	2.279	35	67.7	597_1	597
601	10.0167	11.1	140	2642	2.642	2316	2.316	33	68.1	597_1	597
602	10.0333	11.1	141	2702	2.702	2362	2.362	34	69.4	597_1	597
604	10.0667	11.1	142	2708	2.708	2372	2.372	33	69.9	597_1	597
606	10.1	11.1	142	2723	2.723	2387	2.387	33	70.7	597_1	597
608	10.1333	11.1	142	2735	2.735	2414	2.414	33	71.9	597_1	597
609	10.15	11.1	143	2757	2.757	2436	2.436	32	72.8	597_1	597
611	10.1833	11.1	143	2766	2.766	2450	2.45	35	74.1	597_1	597
612	10.2	11.1	144	2820	2.82	2478	2.478	36	74.9	597_1	597
614	10.2333	11.1	144	2768	2.768	2472	2.472	35	74.8	597_1	597
616	10.2667	11.1	145	2792	2.792	2501	2.501	34	75.3	597_1	597
618	10.3	11.1	145	2768	2.768	2487	2.487	36	75	597_1	597
619	10.3167	11.1	145	2780	2.78	2491	2.491	37	74.4	597_1	597
621	10.35	11.1	145	2784	2.784	2494	2.494	37	74	597_1	597
623	10.3833	11.1	145	2811	2.811	2526	2.526	36	74.7	597_1	597
624	10.4	11.1	145	2796	2.796	2519	2.519	36	74.5	597_1	597
626	10.4333	11.1	146	2794	2.794	2513	2.513	36	74.3	597_1	597
627	10.45	11.1	146	2721	2.721	2449	2.449	37	72.8	597_1	597
629	10.4833	11.1	146	2578	2.578	2290	2.29	37	67	597_1	597
631	10.5167	11.1	146	2609	2.609	2326	2.326	37	68.3	597_1	597
633	10.55	11.1	145	2698	2.698	2373	2.373	34	68.5	597_1	597
635	10.5833	11.1	145	2740	2.74	2375	2.375	35	68.2	597_1	597
636	10.6	11.1	146	2803	2.803	2400	2.4	36	69	597_1	597
637	10.6167	11.1	146	2919	2.919	2485	2.485	37	71.8	597_1	597
639	10.65	11.1	146	3120	3.12	2682	2.682	38	79.5	597_1	597
640	10.6667	11.1	146	3102	3.102	2722	2.722	41	82.6	597_1	597
642	10.7	11.1	146	3097	3.097	2698	2.698	36	79.3	597_1	597
643	10.7167	11.1	146	3036	3.036	2704	2.704	39	81.1	597_1	597
645	10.75	11.1	147	3002	3.002	2714	2.714	40	82.2	597_1	597
646	10.7667	11.1	147	2979	2.979	2724	2.724	39	82.4	597_1	597
647	10.7833	11.1	147	2957	2.957	2706	2.706	40	82.2	597_1	597
649	10.8167	11.1	147	2952	2.952	2747	2.747	38	82.3	597_1	597
651	10.85	11.1	147	2909	2.909	2716	2.716	38	81.5	597_1	597
652	10.8667	11.1	147	2913	2.913	2721	2.721	40	82	597_1	597
654	10.9	11.1	147	2930	2.93	2724	2.724	42	82.6	597_1	597
655	10.9167	11.1	147	2907	2.907	2712	2.712	42	82.4	597_1	597
656	10.9333	12	147	2908	2.908	2712	2.712	42	82.4	597_1	597
658	10.9667	12	148	2878	2.878	2701	2.701	40	81.6	597_1	597
659	10.9833	12	148	2859	2.859	2691	2.691	40	80.7	597_1	597
661	11.0167	12	149	2877	2.877	2706	2.706	41	80.9	597_1	597
662	11.0333	12	149	2897	2.897	2729	2.729	41	81.8	597_1	597
664	11.0667	12	149	2921	2.921	2764	2.764	40	83.1	597_1	597
666	11.1	12	150	2868	2.868	2720	2.72	40	82	597_1	597
667	11.1167	12	150	2827	2.827	2678	2.678	39	79.6	597_1	597
669	11.15	12	150	2869	2.869	2704	2.704	37	79.3	597_1	597
671	11.1833	12	150	2872	2.872	2685	2.685	38	79	597_1	597
672	11.2	12	150	2844	2.844	2655	2.655	38	77.5	597_1	597
674	11.2333	12	150	2864	2.864	2669	2.669	36	77.1	597_1	597
676	11.2667	12	150	2864	2.864	2669	2.669	36	77.1	597_1	597
678	11.3	12	151	2894	2.894	2707	2.707	36	78.8	597_1	597
679	11.3167	12	151	2938	2.938	2748	2.748	36	80.4	597_1	597
681	11.35	12	152	2977	2.977	2798	2.798	35	81.9	597_1	597
682	11.3667	12	152	3001	3.001	2826	2.826	37	83.4	597_1	597
683	11.3833	12	152	3020	3.02	2849	2.849	39	84.6	597_1	597
685	11.4167	12	152	2994	2.994	2844	2.844	38	85.4	597_1	597
687	11.45	12	152	2974	2.974	2833	2.833	39	84.9	597_1	597
688	11.4667	12	152	2972	2.972	2838	2.838	40	85.4	597_1	597
689	11.4833	12	152	2972	2.972	2839	2.839	43	86.1	597_1	597
691	11.5167	12	153	2992	2.992	2850	2.85	42	86.2	597_1	597
693	11.55	12	153	2929	2.929	2812	2.812	40	84.8	597_1	597
694	11.5667	12	153	2949	2.949	2819	2.819	40	84.6	597_1	597
695	11.5833	12	154	2958	2.958	2820	2.82	43	84.4	597_1	597
697	11.6167	12	154	3042	3.042	2881	2.881	44	86.4	597_1	597
698	11.6333	12	154	3060	3.06	2891	2.891	42	86.7	597_1	597
700	11.6667	12	154	3023	3.023	2873	2.873	40	86	597_1	597
701	11.6833	12	154	2998	2.998	2872	2.872	40	85.9	597_1	597
703	11.7167	12	154	3016	3.016	2890	2.89	42	86.8	597_1	597
704	11.7333	12	154	2996	2.996	2888	2.888	42	87.1	597_1	597
706	11.7667	12	154	3018	3.018	2922	2.922	40	87.8	597_1	597
708	11.8	12	155	2988	2.988	2890	2.89	38	86.3	597_1	597
709	11.8167	12	155	2972	2.972	2906	2.906	39	86	597_1	597
711	11.85	12	155	3003	3.003	2939	2.939	41	87.4	597_1	597
712	11.8667	12	155	2998	2.998	2947	2.947	39	87	597_1	597
714	11.9	12	156	2984	2.984	2954	2.954	37	87.3	597_1	597
716	11.9333	12	156	2975	2.975	2948	2.948	36	86.6	597_1	597
717	11.95	13	156	2932	2.932	2922	2.922	38	86.1	597_1	597
718	11.9667	13	156	2967	2.967	2956	2.956	39	87.7	597_1	597
720	12	13	156	3023	3.023	2998	2.998	39	88.7	597_1	597
721	12.0167	13	156	3023	3.023	2998	2.998	39	88.7	597_1	597
722	12.0333	13	156	3070	3.07	3034	3.034	41	90.5	597_1	597
724	12.0667	13	156	3085	3.085	3042	3.042	41	90.4	597_1	597
725	12.0833	13	156	3110	3.11	3063	3.063	43	92	597_1	597
727	12.1167	13	156	3110	3.11	3063	3.063	43	92	597_1	597
729	12.15	13	157	3102	3.102	3038	3.038	43	91.2	597_1	597
730	12.1667	13	157	3104	3.104	3049	3.049	43	91.7	597_1	597
732	12.2	13	157	3067	3.067	3044	3.044	41	91.4	597_1	597
733	12.2167	13	157	3057	3.057	3036	3.036	42	91.1	597_1	597
734	12.2333	13	157	3075	3.075	3051	3.051	43	92.1	597_1	597
736	12.2667	13	158	3110	3.11	3085	3.085	43	92.2	597_1	597
737	12.2833	13	158	3116	3.116	3111	3.111	43	93.5	597_1	597
738	12.3	13	158	3157	3.157	3138	3.138	45	94.9	597_1	597
740	12.3333	13	158	3097	3.097	3107	3.107	43	94.3	597_1	597
741	12.35	13	158	3105	3.105	3111	3.111	45	94.7	597_1	597
742	12.3667	13	158	3074	3.074	3083	3.083	45	94.1	597_1	597
744	12.4	13	158	3083	3.083	3104	3.104	43	93.8	597_1	597
745	12.4167	13	159	3058	3.058	3094	3.094	43	92.7	597_1	597
747	12.45	13	159	3070	3.07	3119	3.119	43	92.8	597_1	597
748	12.4667	13	159	3058	3.058	3098	3.098	42	92.1	597_1	597
749	12.4833	13	160	3097	3.097	3151	3.151	41	93	597_1	597
751	12.5167	13	160	3122	3.122	3177	3.177	41	93.4	597_1	597
752	12.5333	13	160	3144	3.144	3203	3.203	43	94.6	597_1	597
753	12.55	13	160	3141	3.141	3197	3.197	43	94.3	597_1	597
755	12.5833	13	160	3146	3.146	3213	3.213	43	95.6	597_1	597
756	12.6	13	160	3117	3.117	3193	3.193	43	95.9	597_1	597
758	12.6333	13	160	3092	3.092	3199	3.199	45	96.8	597_1	597
759	12.65	13	160	3054	3.054	3173	3.173	43	95.6	597_1	597
761	12.6833	13	160	3042	3.042	3172	3.172	43	95.7	597_1	597
762	12.7	13	160	3042	3.042	3172	3.172	43	95.7	597_1	597
763	12.7167	13	160	3089	3.089	3207	3.207	43	96.3	597_1	597
765	12.75	13	160	3089	3.089	3217	3.217	43	96	597_1	597
766	12.7667	13	160	3102	3.102	3247	3.247	43	96.5	597_1	597
767	12.7833	13	161	3125	3.125	3290	3.29	45	98	597_1	597
769	12.8167	13	161	3145	3.145	3307	3.307	45	98.6	597_1	597
770	12.8333	13	161	3139	3.139	3317	3.317	45	98.7	597_1	597
771	12.85	13	162	3139	3.139	3317	3.317	45	98.7	597_1	597
773	12.8833	13	162	3139	3.139	3330	3.33	45	99.4	597_1	597
774	12.9	13	162	3137	3.137	3338	3.338	45	99.8	597_1	597
782	13.0333	13	162	3144	3.144	3354	3.354	45	100.2	597_1	597
783	13.05	14.1	162	3151	3.151	3374	3.374	46	101.1	597_1	597
785	13.0833	14.1	162	3161	3.161	3395	3.395	46	101.9	597_1	597
786	13.1	14.1	162	3167	3.167	3401	3.401	46	102.2	597_1	597
787	13.1167	14.1	162	3165	3.165	3407	3.407	46	102	597_1	597
789	13.15	14.1	162	3161	3.161	3412	3.412	46	102.1	597_1	597
790	13.1667	14.1	162	3164	3.164	3415	3.415	46	102.6	597_1	597
791	13.1833	14.1	163	3179	3.179	3436	3.436	46	102.7	597_1	597
793	13.2167	14.1	163	3178	3.178	3439	3.439	46	102.8	597_1	597
794	13.2333	14.1	163	3172	3.172	3437	3.437	45	102.7	597_1	597
795	13.25	14.1	163	3183	3.183	3452	3.452	45	102.6	597_1	597
796	13.2667	14.1	164	3176	3.176	3463	3.463	46	103.5	597_1	597
798	13.3	14.1	164	3176	3.176	3463	3.463	46	103.5	597_1	597
799	13.3167	14.1	164	3176	3.176	3463	3.463	46	103.5	597_1	597
800	13.3333	14.1	164	3170	3.17	3447	3.447	47	104.3	597_1	597
802	13.3667	14.1	164	3164	3.164	3452	3.452	46	104.7	597_1	597
803	13.3833	14.1	164	3134	3.134	3417	3.417	46	104.6	597_1	597
804	13.4	14.1	164	3128	3.128	3424	3.424	46	105	597_1	597
806	13.4333	14.1	164	3129	3.129	3429	3.429	46	105.2	597_1	597
807	13.45	14.1	164	3133	3.133	3440	3.44	45	104.6	597_1	597
808	13.4667	14.1	165	3152	3.152	3468	3.468	46	105.4	597_1	597
809	13.4833	14.1	165	3152	3.152	3468	3.468	46	105.4	597_1	597
811	13.5167	14.1	165	3150	3.15	3461	3.461	47	104.8	597_1	597
812	13.5333	14.1	165	3184	3.184	3478	3.478	46	105.3	597_1	597
813	13.55	14.1	165	3176	3.176	3464	3.464	47	104.8	597_1	597
815	13.5833	14.1	166	3166	3.166	3446	3.446	47	103.8	597_1	597
816	13.6	14.1	166	3154	3.154	3445	3.445	47	102.4	597_1	597
817	13.6167	14.1	166	3180	3.18	3458	3.458	47	101.6	597_1	597
819	13.65	14.1	166	3146	3.146	3429	3.429	47	101.5	597_1	597
820	13.6667	14.1	166	3164	3.164	3452	3.452	46	101.3	597_1	597
821	13.6833	14.1	166	3136	3.136	3431	3.431	47	102	597_1	597
822	13.7	14.1	166	3166	3.166	3448	3.448	47	103	597_1	597
823	13.7167	14.1	166	3178	3.178	3453	3.453	50	105.3	597_1	597
824	13.7333	14.1	167	3191	3.191	3464	3.464	52	107.2	597_1	597
825	13.75	14.1	167	3178	3.178	3467	3.467	51	106.7	597_1	597
826	13.7667	14.1	167	3226	3.226	3543	3.543	53	109	597_1	597
828	13.8	14.1	167	3186	3.186	3502	3.502	54	110	597_1	597
829	13.8167	14.1	167	3197	3.197	3530	3.53	53	110	597_1	597
830	13.8333	14.1	167	3208	3.208	3553	3.553	53	110.1	597_1	597
831	13.85	14.1	167	3218	3.218	3570	3.57	52	110.5	597_1	597
832	13.8667	14.1	167	3188	3.188	3521	3.521	53	110	597_1	597
833	13.8833	14.1	167	3222	3.222	3574	3.574	54	112	597_1	597
834	13.9	14.1	167	3213	3.213	3578	3.578	54	111.8	597_1	597
836	13.9333	14.1	167	3213	3.213	3578	3.578	54	111.8	597_1	597
837	13.95	14.1	168	3244	3.244	3609	3.609	55	113	597_1	597
838	13.9667	14.1	168	3206	3.206	3594	3.594	55	112	597_1	597
839	13.9833	14.1	168	3211	3.211	3609	3.609	55	112.9	597_1	597
840	14	14.1	168	3234	3.234	3657	3.657	55	113.4	597_1	597
841	14.0167	14.1	169	3216	3.216	3635	3.635	53	111.5	597_1	597
842	14.0333	14.1	168	3201	3.201	3608	3.608	54	111.5	597_1	597
843	14.05	14.1	168	3200	3.2	3604	3.604	57	112.9	597_1	597
844	14.0667	14.1	168	3201	3.201	3604	3.604	57	112.9	597_1	597
845	14.0833	15.1	168	3201	3.201	3597	3.597	57	112.2	597_1	597
846	14.1	15.1	169	3178	3.178	3565	3.565	58	111.6	597_1	597
847	14.1167	15.1	169	3115	3.115	3511	3.511	59	110.4	597_1	597
848	14.1333	15.1	169	3162	3.162	3558	3.558	60	111.8	597_1	597
850	14.1667	15.1	169	3159	3.159	3555	3.555	56	109.8	597_1	597
851	14.1833	15.1	169	3154	3.154	3555	3.555	54	108.7	597_1	597
852	14.2	15.1	169	3144	3.144	3558	3.558	54	108.3	597_1	597
853	14.2167	15.1	169	3171	3.171	3573	3.573	56	109.7	597_1	597
854	14.2333	15.1	169	3147	3.147	3557	3.557	57	110.2	597_1	597
855	14.25	15.1	169	3188	3.188	3583	3.583	56	110.4	597_1	597
856	14.2667	15.1	169	3188	3.188	3583	3.583	56	110.4	597_1	597
857	14.2833	15.1	169	3158	3.158	3555	3.555	60	111.2	597_1	597
858	14.3	15.1	169	3197	3.197	3586	3.586	60	112.4	597_1	597
859	14.3167	15.1	169	3225	3.225	3598	3.598	58	112.2	597_1	597
860	14.3333	15.1	169	3203	3.203	3580	3.58	57	110.9	597_1	597
861	14.35	15.1	169	3189	3.189	3569	3.569	56	109.9	597_1	597
862	14.3667	15.1	169	3185	3.185	3587	3.587	57	110	597_1	597
863	14.3833	15.1	169	3127	3.127	3527	3.527	57	109.5	597_1	597
864	14.4	15.1	169	3145	3.145	3575	3.575	58	110.9	597_1	597
865	14.4167	15.1	170	3125	3.125	3565	3.565	59	110.3	597_1	597
866	14.4333	15.1	170	3125	3.125	3565	3.565	59	110.3	597_1	597
867	14.45	15.1	170	3143	3.143	3591	3.591	60	110.8	597_1	597
868	14.4667	15.1	170	3149	3.149	3592	3.592	60	110.4	597_1	597
869	14.4833	15.1	170	3152	3.152	3577	3.577	60	109.6	597_1	597
870	14.5	15.1	169	3165	3.165	3588	3.588	60	110.7	597_1	597
871	14.5167	15.1	170	3161	3.161	3571	3.571	60	109.3	597_1	597
872	14.5333	15.1	169	3168	3.168	3586	3.586	61	110.3	597_1	597
873	14.55	15.1	169	3167	3.167	3586	3.586	61	110.3	597_1	597
874	14.5667	15.1	169	3175	3.175	3611	3.611	62	111.4	597_1	597
875	14.5833	15.1	169	3169	3.169	3600	3.6	61	112	597_1	597
876	14.6	15.1	170	3186	3.186	3634	3.634	63	113.8	597_1	597
877	14.6167	15.1	170	3192	3.192	3656	3.656	61	113.1	597_1	597
878	14.6333	15.1	170	3240	3.24	3694	3.694	61	114.1	597_1	597
879	14.65	15.1	170	3252	3.252	3726	3.726	60	113.4	597_1	597
880	14.6667	15.1	170	3226	3.226	3687	3.687	59	112.5	597_1	597
882	14.7	15.1	170	3136	3.136	3618	3.618	56	108.5	597_1	597
883	14.7167	15.1	170	3086	3.086	3579	3.579	54	106.8	597_1	597
884	14.7333	15.1	169	2983	2.983	3469	3.469	49	102.6	597_1	597
886	14.7667	15.1	169	2900	2.9	3381	3.381	46	100.8	597_1	597
887	14.7833	15.1	169	2781	2.781	3263	3.263	44	98.4	597_1	597
888	14.8	15.1	169	2759	2.759	3257	3.257	44	98.1	597_1	597
890	14.8333	15.1	169	2696	2.696	3194	3.194	44	97.4	597_1	597
891	14.85	4.9	168	2642	2.642	3146	3.146	44	96.8	597_1	597
892	14.8667	4.9	168	2595	2.595	3091	3.091	44	95.2	597_1	597
894	14.9	4.9	167	2629	2.629	3140	3.14	43	96.6	597_1	597
895	14.9167	4.9	166	2701	2.701	3242	3.242	44	97.2	597_1	597
896	14.9333	4.9	166	2837	2.837	3366	3.366	45	98	597_1	597
898	14.9667	4.9	165	2934	2.934	3426	3.426	44	97.7	597_1	597
899	14.9833	4.9	164	3070	3.07	3567	3.567	45	99.8	597_1	597
900	15	4.9	163	3161	3.161	3654	3.654	45	100.8	597_1	597
902	15.0333	4.9	163	3158	3.158	3666	3.666	46	101.4	597_1	597
903	15.05	4.9	163	3118	3.118	3629	3.629	46	101	597_1	597
904	15.0667	4.9	162	3058	3.058	3572	3.572	46	100.3	597_1	597
906	15.1	4.9	161	3003	3.003	3534	3.534	45	98.8	597_1	597
907	15.1167	4.9	161	2924	2.924	3499	3.499	44	97.3	597_1	597
909	15.15	4.9	161	2913	2.913	3465	3.465	43	96.8	597_1	597
910	15.1667	4.9	160	2876	2.876	3444	3.444	44	97.2	597_1	597
911	15.1833	4.9	160	2880	2.88	3466	3.466	44	97.4	597_1	597
913	15.2167	4.9	159	2835	2.835	3401	3.401	43	95.8	597_1	597
914	15.2333	4.9	159	2776	2.776	3335	3.335	43	96	597_1	597
915	15.25	4.9	158	2710	2.71	3278	3.278	44	95.6	597_1	597
917	15.2833	4.9	158	2684	2.684	3254	3.254	43	95	597_1	597
918	15.3	4.9	158	2637	2.637	3198	3.198	43	94.3	597_1	597
920	15.3333	4.9	158	2633	2.633	3206	3.206	43	94.5	597_1	597
921	15.35	4.9	157	2589	2.589	3162	3.162	42	92.8	597_1	597
922	15.3667	4.9	157	2603	2.603	3167	3.167	41	92.7	597_1	597
924	15.4	4.9	157	2603	2.603	3167	3.167	41	92.7	597_1	597
926	15.4333	4.9	156	2570	2.57	3121	3.121	41	92.3	597_1	597
927	15.45	4.9	156	2592	2.592	3132	3.132	42	93.8	597_1	597
928	15.4667	4.9	156	2582	2.582	3141	3.141	42	94.1	597_1	597
930	15.5	4.9	156	2498	2.498	3041	3.041	40	89.9	597_1	597
932	15.5333	4.9	156	2487	2.487	3010	3.01	41	89.2	597_1	597
933	15.55	4.9	155	2492	2.492	3010	3.01	42	89.4	597_1	597
934	15.5667	4.9	155	2437	2.437	2935	2.935	40	87	597_1	597
936	15.6	4.9	154	2508	2.508	3018	3.018	41	91.3	597_1	597
937	15.6167	4.9	153	2476	2.476	2954	2.954	40	89.2	597_1	597
939	15.65	4.9	152	2457	2.457	2893	2.893	40	87.1	597_1	597
940	15.6667	4.9	152	2531	2.531	2945	2.945	42	89.1	597_1	597
942	15.7	4.9	152	2530	2.53	2929	2.929	41	89.5	597_1	597
943	15.7167	4.9	151	2433	2.433	2829	2.829	39	85.6	597_1	597
945	15.75	4.9	151	2460	2.46	2847	2.847	39	86	597_1	597
947	15.7833	4.9	151	2431	2.431	2813	2.813	38	84.4	597_1	597
948	15.8	4.9	150	2373	2.373	2773	2.773	38	83.8	597_1	597
950	15.8333	4.9	150	2341	2.341	2758	2.758	38	83.4	597_1	597
951	15.85	4.9	149	2303	2.303	2729	2.729	38	82.3	597_1	597
953	15.8833	4.9	149	2278	2.278	2701	2.701	37	81.4	597_1	597
954	15.9	4.9	149	2303	2.303	2728	2.728	38	82.3	597_1	597
956	15.9333	4.9	149	2309	2.309	2731	2.731	39	82.7	597_1	597
957	15.95	4.9	148	2307	2.307	2736	2.736	39	83	597_1	597
959	15.9833	4.9	147	2314	2.314	2743	2.743	39	83.2	597_1	597
960	16	4.9	147	2313	2.313	2747	2.747	39	83.6	597_1	597
962	16.0333	4.9	147	2322	2.322	2767	2.767	40	84.8	597_1	597
963	16.05	4.9	147	2344	2.344	2785	2.785	40	84.9	597_1	597
965	16.0833	4.9	146	2330	2.33	2779	2.779	40	85.1	597_1	597
966	16.1	4.9	146	2314	2.314	2769	2.769	39	85.7	597_1	597
968	16.1333	4.9	145	2309	2.309	2767	2.767	40	86.8	597_1	597
969	16.15	4.9	145	2290	2.29	2740	2.74	40	86.7	597_1	597
971	16.1833	4.9	144	2262	2.262	2702	2.702	40	86.3	597_1	597
972	16.2	4.9	143	2252	2.252	2684	2.684	40	86	597_1	597
974	16.2333	4.9	143	2252	2.252	2684	2.684	40	86	597_1	597
975	16.25	4.9	143	2246	2.246	2688	2.688	40	86.4	597_1	597
977	16.2833	4.9	143	2207	2.207	2648	2.648	39	85.1	597_1	597
978	16.3	4.9	143	2200	2.2	2628	2.628	39	84.6	597_1	597
980	16.3333	4.9	142	2194	2.194	2611	2.611	40	84.5	597_1	597
982	16.3667	4.9	142	2209	2.209	2612	2.612	40	85	597_1	597
983	16.3833	4.9	142	2161	2.161	2552	2.552	39	83.8	597_1	597
985	16.4167	4.9	142	2118	2.118	2510	2.51	39	82.3	597_1	597
986	16.4333	4.9	141	2102	2.102	2479	2.479	39	80.8	597_1	597
987	16.45	4.9	141	2082	2.082	2455	2.455	39	79.7	597_1	597
989	16.4833	4.9	141	2083	2.083	2429	2.429	39	78.8	597_1	597
990	16.5	4.9	140	2130	2.13	2452	2.452	40	79.8	597_1	597
992	16.5333	4.9	140	2119	2.119	2441	2.441	40	79.6	597_1	597
993	16.55	4.9	140	2129	2.129	2436	2.436	39	79.3	597_1	597
995	16.5833	4.9	140	2149	2.149	2451	2.451	39	80.2	597_1	597
996	16.6	4.9	139	2165	2.165	2448	2.448	40	81	597_1	597
998	16.6333	4.9	139	2165	2.165	2448	2.448	40	81	597_1	597
1000	16.6667	4.9	139	2162	2.162	2451	2.451	40	81.1	597_1	597
1001	16.6833	4.9	138	2145	2.145	2435	2.435	40	80.6	597_1	597
1003	16.7167	4.9	138	2120	2.12	2428	2.428	40	80.9	597_1	597
1004	16.7333	4.9	138	2131	2.131	2437	2.437	40	81.6	597_1	597
1006	16.7667	4.9	137	2131	2.131	2434	2.434	40	81.3	597_1	597
1007	16.7833	4.9	137	2090	2.09	2395	2.395	39	80.1	597_1	597
1009	16.8167	4.9	137	2116	2.116	2416	2.416	39	80.5	597_1	597
1010	16.8333	4.9	136	2101	2.101	2395	2.395	39	79.7	597_1	597
1012	16.8667	4.9	136	2087	2.087	2376	2.376	39	79.4	597_1	597
1014	16.9	4.9	135	2078	2.078	2344	2.344	39	78.2	597_1	597
1016	16.9333	4.9	135	2050	2.05	2307	2.307	39	77.6	597_1	597
1017	16.95	4.9	134	2038	2.038	2283	2.283	40	76.8	597_1	597
1019	16.9833	4.9	134	1995	1.995	2230	2.23	35	73.3	597_1	597
1021	17.0167	4.9	133	1994	1.994	2230	2.23	35	73.3	597_1	597
1022	17.0333	4.9	133	2043	2.043	2238	2.238	35	72.6	597_1	597
1024	17.0667	4.9	133	2066	2.066	2238	2.238	36	72.2	597_1	597
1025	17.0833	4.9	132	2116	2.116	2258	2.258	36	73.2	597_1	597
1026	17.1	4.9	132	2233	2.233	2353	2.353	42	77.9	597_1	597
1028	17.1333	4.9	132	2250	2.25	2369	2.369	41	79.4	597_1	597
1029	17.15	4.9	132	2251	2.251	2370	2.37	41	79.4	597_1	597
1031	17.1833	4.9	131	2183	2.183	2344	2.344	42	79.8	597_1	597
1032	17.2	4.9	131	2117	2.117	2322	2.322	42	81.5	597_1	597
1034	17.2333	4.9	130	2036	2.036	2272	2.272	42	81.5	597_1	597
1035	17.25	4.9	130	1967	1.967	2217	2.217	41	79.7	597_1	597
1037	17.2833	4.9	129	1895	1.895	2157	2.157	39	77.1	597_1	597
1039	17.3167	4.9	128	1875	1.875	2117	2.117	38	73.9	597_1	597
1041	17.35	4.9	127	1829	1.829	2072	2.072	36	71.3	597_1	597
1043	17.3833	4.9	126	1740	1.74	1976	1.976	33	66.7	597_1	597
1045	17.4167	4.9	126	1753	1.753	1988	1.988	32	66.4	597_1	597
1046	17.4333	4.9	126	1765	1.765	1985	1.985	33	66.2	597_1	597
1048	17.4667	4.9	126	1753	1.753	1968	1.968	33	65.8	597_1	597
1049	17.4833	4.9	125	1762	1.762	1966	1.966	33	66.5	597_1	597
1051	17.5167	4.9	124	1752	1.752	1964	1.964	34	67.2	597_1	597
1053	17.55	4.9	124	1800	1.8	2010	2.01	38	70.8	597_1	597
1054	17.5667	4.9	124	1801	1.801	2010	2.01	38	70.8	597_1	597
1057	17.6167	4.9	124	1754	1.754	1964	1.964	37	69.3	597_1	597
1058	17.6333	4.9	124	1733	1.733	1952	1.952	37	68.7	597_1	597
1060	17.6667	4.9	124	1734	1.734	1950	1.95	37	68.4	597_1	597
1062	17.7	4.9	123	1700	1.7	1919	1.919	36	67	597_1	597
1063	17.7167	4.9	123	1700	1.7	1919	1.919	36	67	597_1	597
1065	17.75	4.9	122	1682	1.682	1901	1.901	36	66.4	597_1	597
1067	17.7833	4.9	122	1622	1.622	1810	1.81	34	62.8	597_1	597
1069	17.8167	4.9	121	1701	1.701	1908	1.908	36	66.1	597_1	597
1070	17.8333	4.9	121	1694	1.694	1895	1.895	36	66.1	597_1	597
1072	17.8667	4.9	120	1650	1.65	1848	1.848	35	64.8	597_1	597
1074	17.9	4.9	120	1626	1.626	1819	1.819	34	63.5	597_1	597
1076	17.9333	4.9	119	1588	1.588	1786	1.786	33	62.5	597_1	597
1078	17.9667	4.9	119	1576	1.576	1769	1.769	32	61.9	597_1	597
1080	18	4.9	119	1586	1.586	1780	1.78	33	63.3	597_1	597
1081	18.0167	4.9	119	1569	1.569	1765	1.765	34	64	597_1	597
1083	18.05	4.9	119	1566	1.566	1764	1.764	34	63.8	597_1	597
1085	18.0833	4.9	119	1553	1.553	1751	1.751	33	63	597_1	597
1086	18.1	4.9	119	1557	1.557	1754	1.754	34	64.3	597_1	597
1088	18.1333	4.9	118	1540	1.54	1735	1.735	35	64.1	597_1	597
1090	18.1667	4.9	118	1535	1.535	1724	1.724	36	64.6	597_1	597
1092	18.2	4.9	117	1542	1.542	1729	1.729	36	64.8	597_1	597
1093	18.2167	4.9	117	1542	1.542	1729	1.729	36	64.8	597_1	597
1095	18.25	4.9	117	1529	1.529	1713	1.713	36	64.2	597_1	597
1096	18.2667	4.9	117	1557	1.557	1740	1.74	37	65.5	597_1	597
1099	18.3167	4.9	117	1529	1.529	1713	1.713	36	64.3	597_1	597
1100	18.3333	4.9	116	1542	1.542	1718	1.718	37	64.6	597_1	597
1102	18.3667	4.9	116	1537	1.537	1713	1.713	36	63.9	597_1	597
1104	18.4	4.9	116	1487	1.487	1679	1.679	33	62.1	597_1	597
1106	18.4333	4.9	115	1463	1.463	1643	1.643	33	60.6	597_1	597
1107	18.45	4.9	114	1473	1.473	1632	1.632	33	60.1	597_1	597
1109	18.4833	4.9	113	1430	1.43	1599	1.599	32	58.9	597_1	597
