# Supplementary material for: On the development of diagnostic support algorithms based on CPET biosignals data via machine learning and wavelets
Source: PeerJ journal article supplement (doi:10.7717/peerj-cs.2474), 2025-01-30
Supplement: raw_data.zip [file Subject_39.xlsx]

## Sheet: Folha1
time	time	Speed	HR	VO2	VO2	VCO2	VCO2	RR	VE	ID_test	ID
	min	km/h	/min	ml/min	L/min	ml/min	L/min	/min	L/min
0	0	0		515	0.515	470	0.47	26	15.9	598_1	598
3	0.05	0	63	166	0.166	161	0.161	19	9.1	598_1	598
6	0.1	0	51	173	0.173	158	0.158	23	9.4	598_1	598
10	0.166667	0	62	319	0.319	290	0.29	18	11.2	598_1	598
14	0.233333	0	62	403	0.403	362	0.362	17	12.6	598_1	598
20	0.333333	0	60	422	0.422	381	0.381	18	13.1	598_1	598
25	0.416667	0	58	398	0.398	362	0.362	19	13.3	598_1	598
28	0.466667	0	56	474	0.474	432	0.432	16	14.4	598_1	598
32	0.533333	0	54	474	0.474	432	0.432	16	14.4	598_1	598
37	0.616667	0	53	489	0.489	455	0.455	14	14.7	598_1	598
42	0.7	0	53	520	0.52	498	0.498	13	15.8	598_1	598
45	0.75	4.9	54	527	0.527	519	0.519	14	16.6	598_1	598
47	0.783333	4.9	54	465	0.465	479	0.479	17	16.5	598_1	598
50	0.833333	4.9	56	490	0.49	501	0.501	17	16.6	598_1	598
54	0.9	4.9	59	489	0.489	500	0.5	17	16.6	598_1	598
58	0.966667	4.9	64	586	0.586	586	0.586	19	18.8	598_1	598
62	1.03333	4.9	70	631	0.631	625	0.625	18	19.8	598_1	598
65	1.08333	4.9	76	685	0.685	657	0.657	20	20.8	598_1	598
69	1.15	4.9	82	719	0.719	678	0.678	17	21.1	598_1	598
70	1.16667	4.9	86	725	0.725	669	0.669	18	20.9	598_1	598
74	1.23333	4.9	89	766	0.766	706	0.706	16	21.3	598_1	598
77	1.28333	4.9	91	804	0.804	719	0.719	16	21.3	598_1	598
80	1.33333	4.9	92	774	0.774	677	0.677	19	20.6	598_1	598
83	1.38333	4.9	92	853	0.853	724	0.724	20	21.6	598_1	598
87	1.45	4.9	93	951	0.951	787	0.787	19	23.1	598_1	598
90	1.5	4.9	93	1025	1.025	845	0.845	19	24.8	598_1	598
92	1.53333	4.9	93	1101	1.101	906	0.906	18	26.1	598_1	598
95	1.58333	4.9	94	1135	1.135	925	0.925	19	26.6	598_1	598
99	1.65	4.9	95	1232	1.232	1002	1.002	19	28.9	598_1	598
102	1.7	4.9	96	1254	1.254	1023	1.023	18	29.1	598_1	598
106	1.76667	4.9	97	1244	1.244	1022	1.022	18	29.2	598_1	598
110	1.83333	4.9	98	1277	1.277	1049	1.049	19	29.9	598_1	598
114	1.9	4.9	98	1286	1.286	1056	1.056	17	29.6	598_1	598
118	1.96667	4.9	99	1327	1.327	1097	1.097	17	31	598_1	598
121	2.01667	4.9	99	1346	1.346	1132	1.132	17	31.8	598_1	598
125	2.08333	4.9	99	1379	1.379	1174	1.174	16	32.8	598_1	598
130	2.16667	4.9	98	1399	1.399	1222	1.222	16	34.2	598_1	598
133	2.21667	4.9	98	1434	1.434	1266	1.266	15	35.5	598_1	598
136	2.26667	4.9	98	1416	1.416	1272	1.272	16	36.1	598_1	598
139	2.31667	4.9	98	1417	1.417	1272	1.272	16	36.1	598_1	598
142	2.36667	4.9	98	1420	1.42	1297	1.297	17	37.2	598_1	598
147	2.45	4.9	100	1388	1.388	1296	1.296	16	36.9	598_1	598
152	2.53333	4.9	101	1363	1.363	1289	1.289	15	36	598_1	598
156	2.6	4.9	102	1369	1.369	1306	1.306	15	36.5	598_1	598
160	2.66667	4.9	103	1358	1.358	1295	1.295	14	35.9	598_1	598
164	2.73333	4.9	103	1327	1.327	1263	1.263	14	35	598_1	598
167	2.78333	4.9	103	1346	1.346	1269	1.269	14	34.6	598_1	598
170	2.83333	4.9	103	1341	1.341	1249	1.249	15	33.8	598_1	598
174	2.9	4.9	103	1343	1.343	1239	1.239	16	33.6	598_1	598
177	2.95	4.9	103	1330	1.33	1208	1.208	17	33.1	598_1	598
182	3.03333	4.9	103	1329	1.329	1208	1.208	17	33.1	598_1	598
185	3.08333	4.9	102	1306	1.306	1174	1.174	18	32.3	598_1	598
188	3.13333	4.9	102	1305	1.305	1168	1.168	18	32.3	598_1	598
191	3.18333	4.9	102	1315	1.315	1183	1.183	19	32.9	598_1	598
196	3.26667	4.9	102	1293	1.293	1175	1.175	17	32.2	598_1	598
200	3.33333	4.9	102	1318	1.318	1198	1.198	17	32.5	598_1	598
203	3.38333	4.9	102	1345	1.345	1231	1.231	16	33.3	598_1	598
207	3.45	4.9	102	1328	1.328	1217	1.217	17	33.2	598_1	598
210	3.5	4.9	102	1329	1.329	1216	1.216	17	33	598_1	598
213	3.55	4.9	102	1329	1.329	1217	1.217	17	33.1	598_1	598
215	3.58333	4.9	102	1284	1.284	1179	1.179	17	32.4	598_1	598
218	3.63333	4.9	102	1304	1.304	1182	1.182	19	33.2	598_1	598
222	3.7	4.9	102	1290	1.29	1164	1.164	19	33	598_1	598
226	3.76667	4.9	101	1290	1.29	1164	1.164	19	33	598_1	598
230	3.83333	4.9	101	1276	1.276	1154	1.154	19	32.6	598_1	598
233	3.88333	4.9	100	1289	1.289	1158	1.158	19	32.4	598_1	598
236	3.93333	4.9	100	1329	1.329	1193	1.193	18	33.2	598_1	598
240	4	4.9	101	1378	1.378	1250	1.25	17	34.5	598_1	598
244	4.06667	4.9	102	1387	1.387	1270	1.27	16	34.8	598_1	598
248	4.13333	4.9	103	1400	1.4	1303	1.303	15	35.8	598_1	598
252	4.2	4.9	105	1390	1.39	1299	1.299	16	35.7	598_1	598
255	4.25	4.9	106	1409	1.409	1318	1.318	16	36.2	598_1	598
258	4.3	4.9	107	1409	1.409	1318	1.318	16	36.2	598_1	598
261	4.35	4.9	108	1402	1.402	1320	1.32	17	36.1	598_1	598
265	4.41667	4.9	108	1385	1.385	1305	1.305	17	35.7	598_1	598
267	4.45	4.9	108	1385	1.385	1305	1.305	17	35.7	598_1	598
270	4.5	4.9	108	1386	1.386	1285	1.285	18	35.1	598_1	598
274	4.56667	4.9	108	1405	1.405	1284	1.284	19	34.9	598_1	598
278	4.63333	4.9	107	1402	1.402	1283	1.283	18	35.1	598_1	598
282	4.7	4.9	107	1396	1.396	1286	1.286	17	35.1	598_1	598
286	4.76667	4.9	107	1428	1.428	1308	1.308	17	35.8	598_1	598
290	4.83333	4.9	107	1428	1.428	1308	1.308	17	35.8	598_1	598
294	4.9	4.9	107	1385	1.385	1290	1.29	16	35.4	598_1	598
297	4.95	4.9	107	1421	1.421	1334	1.334	15	36.4	598_1	598
300	5	4.9	107	1449	1.449	1367	1.367	15	37.2	598_1	598
304	5.06667	4.9	106	1429	1.429	1348	1.348	16	36.6	598_1	598
307	5.11667	4.9	106	1435	1.435	1352	1.352	17	36.7	598_1	598
310	5.16667	4.9	105	1390	1.39	1306	1.306	18	35.8	598_1	598
314	5.23333	4.9	105	1494	1.494	1383	1.383	19	37.7	598_1	598
317	5.28333	4.9	105	1493	1.493	1383	1.383	19	37.7	598_1	598
321	5.35	4.9	105	1405	1.405	1330	1.33	18	36.4	598_1	598
324	5.4	4.9	105	1342	1.342	1283	1.283	18	35.3	598_1	598
328	5.46667	4.9	105	1366	1.366	1315	1.315	18	36.1	598_1	598
330	5.5	4.9	106	1344	1.344	1299	1.299	18	35.9	598_1	598
334	5.56667	4.9	106	1401	1.401	1362	1.362	18	37.8	598_1	598
337	5.61667	4.9	107	1328	1.328	1295	1.295	19	36.2	598_1	598
340	5.66667	4.9	108	1359	1.359	1313	1.313	19	36.6	598_1	598
342	5.7	4.9	109	1388	1.388	1319	1.319	20	36.8	598_1	598
346	5.76667	4.9	110	1404	1.404	1329	1.329	20	37	598_1	598
348	5.8	4.9	111	1426	1.426	1343	1.343	21	37.4	598_1	598
351	5.85	5.4	111	1459	1.459	1362	1.362	21	37.6	598_1	598
354	5.9	5.4	111	1459	1.459	1362	1.362	21	37.6	598_1	598
356	5.93333	5.4	111	1459	1.459	1362	1.362	21	37.6	598_1	598
359	5.98333	5.4	112	1487	1.487	1396	1.396	21	38.5	598_1	598
362	6.03333	5.4	112	1468	1.468	1390	1.39	21	38.8	598_1	598
365	6.08333	5.4	112	1539	1.539	1453	1.453	22	41.1	598_1	598
367	6.11667	5.4	113	1574	1.574	1517	1.517	22	43.8	598_1	598
370	6.16667	5.4	114	1588	1.588	1555	1.555	22	45.4	598_1	598
373	6.21667	5.4	115	1538	1.538	1536	1.536	22	45.2	598_1	598
376	6.26667	5.4	116	1579	1.579	1585	1.585	21	45.2	598_1	598
380	6.33333	5.4	117	1569	1.569	1593	1.593	20	45.5	598_1	598
383	6.38333	6.1	118	1553	1.553	1584	1.584	21	46.2	598_1	598
386	6.43333	6.1	120	1543	1.543	1560	1.56	19	44	598_1	598
388	6.46667	6.1	121	1542	1.542	1560	1.56	19	44	598_1	598
391	6.51667	6.1	122	1594	1.594	1599	1.599	19	44.4	598_1	598
393	6.55	6.1	122	1637	1.637	1631	1.631	19	45.1	598_1	598
395	6.58333	6.1	123	1664	1.664	1663	1.663	21	47.2	598_1	598
398	6.63333	6.1	124	1664	1.664	1652	1.652	23	47	598_1	598
400	6.66667	6.1	124	1670	1.67	1646	1.646	24	46.8	598_1	598
403	6.71667	6.1	125	1730	1.73	1717	1.717	23	48.2	598_1	598
407	6.78333	6.1	126	1684	1.684	1681	1.681	22	47	598_1	598
409	6.81667	6.1	126	1683	1.683	1673	1.673	22	46.5	598_1	598
412	6.86667	6.1	126	1647	1.647	1646	1.646	21	45.8	598_1	598
414	6.9	6.4	126	1664	1.664	1651	1.651	21	45.7	598_1	598
417	6.95	6.4	126	1702	1.702	1691	1.691	22	47.2	598_1	598
419	6.98333	6.4	127	1759	1.759	1746	1.746	23	49.1	598_1	598
421	7.01667	6.4	127	1771	1.771	1752	1.752	25	50.3	598_1	598
423	7.05	6.4	127	1835	1.835	1811	1.811	27	52	598_1	598
425	7.08333	6.4	128	1807	1.807	1798	1.798	27	52.3	598_1	598
428	7.13333	6.4	128	1808	1.808	1798	1.798	27	52.3	598_1	598
430	7.16667	6.4	129	1760	1.76	1756	1.756	27	51.1	598_1	598
432	7.2	6.4	130	1712	1.712	1724	1.724	26	50.3	598_1	598
435	7.25	6.4	131	1739	1.739	1753	1.753	25	50.8	598_1	598
437	7.28333	6.4	131	1749	1.749	1773	1.773	24	51	598_1	598
439	7.31667	6.4	132	1710	1.71	1737	1.737	25	50.4	598_1	598
442	7.36667	6.4	132	1756	1.756	1776	1.776	25	51	598_1	598
444	7.4	7	132	1835	1.835	1852	1.852	25	52.7	598_1	598
446	7.43333	7	133	1900	1.9	1914	1.914	25	54.6	598_1	598
448	7.46667	7	133	1922	1.922	1941	1.941	25	55.3	598_1	598
451	7.51667	7	134	1922	1.922	1945	1.945	26	55.6	598_1	598
453	7.55	7	134	1927	1.927	1956	1.956	27	56.5	598_1	598
455	7.58333	7	135	1922	1.922	1961	1.961	28	57.2	598_1	598
457	7.61667	7	135	1911	1.911	1960	1.96	27	57	598_1	598
459	7.65	7	136	1931	1.931	1982	1.982	28	57.5	598_1	598
461	7.68333	7	136	1956	1.956	2019	2.019	28	58.7	598_1	598
463	7.71667	7	137	1950	1.95	2019	2.019	28	59.1	598_1	598
466	7.76667	7	137	1890	1.89	1966	1.966	27	57.7	598_1	598
468	7.8	7	138	1869	1.869	1959	1.959	27	57.4	598_1	598
470	7.83333	7	138	1884	1.884	1968	1.968	28	57.5	598_1	598
472	7.86667	7	138	1894	1.894	1972	1.972	28	57.7	598_1	598
475	7.91667	7	138	1879	1.879	1968	1.968	28	58.1	598_1	598
477	7.95	7.7	138	1880	1.88	1968	1.968	28	58.1	598_1	598
478	7.96667	7.7	138	1912	1.912	2009	2.009	28	59.1	598_1	598
480	8	7.7	138	1974	1.974	2071	2.071	29	61.1	598_1	598
482	8.03333	7.7	139	1969	1.969	2073	2.073	30	62.3	598_1	598
484	8.06667	7.7	139	2002	2.002	2116	2.116	31	63.3	598_1	598
485	8.08333	7.7	140	2049	2.049	2161	2.161	32	64.6	598_1	598
487	8.11667	7.7	140	2117	2.117	2225	2.225	33	65.8	598_1	598
489	8.15	7.7	141	2073	2.073	2188	2.188	32	65	598_1	598
491	8.18333	7.7	141	2061	2.061	2175	2.175	32	64.2	598_1	598
493	8.21667	7.7	142	2061	2.061	2175	2.175	32	64.2	598_1	598
495	8.25	7.7	142	2061	2.061	2175	2.175	32	64.2	598_1	598
497	8.28333	7.7	143	2042	2.042	2166	2.166	31	64.1	598_1	598
499	8.31667	7.7	144	2083	2.083	2213	2.213	30	65.1	598_1	598
501	8.35	7.7	145	2051	2.051	2179	2.179	29	63	598_1	598
503	8.38333	7.7	146	2124	2.124	2244	2.244	29	64	598_1	598
506	8.43333	8	147	2146	2.146	2253	2.253	28	63.9	598_1	598
507	8.45	8	148	2146	2.146	2253	2.253	28	63.9	598_1	598
510	8.5	8	149	2190	2.19	2297	2.297	28	65.1	598_1	598
512	8.53333	8	149	2250	2.25	2345	2.345	28	65.8	598_1	598
514	8.56667	8	150	2241	2.241	2329	2.329	28	65.3	598_1	598
516	8.6	8	150	2278	2.278	2359	2.359	29	66	598_1	598
518	8.63333	8	150	2264	2.264	2346	2.346	28	65.5	598_1	598
520	8.66667	8	150	2292	2.292	2375	2.375	28	66.4	598_1	598
522	8.7	8	151	2306	2.306	2382	2.382	28	66.4	598_1	598
524	8.73333	8	151	2367	2.367	2428	2.428	29	67.9	598_1	598
526	8.76667	8	151	2403	2.403	2466	2.466	30	69.7	598_1	598
528	8.8	8	151	2386	2.386	2461	2.461	30	69.6	598_1	598
531	8.85	8	152	2328	2.328	2398	2.398	30	68.2	598_1	598
533	8.88333	8	152	2405	2.405	2469	2.469	29	68.5	598_1	598
536	8.93333	8	152	2402	2.402	2462	2.462	28	66.7	598_1	598
538	8.96667	8.6	153	2470	2.47	2524	2.524	27	67	598_1	598
540	9	8.6	153	2470	2.47	2523	2.523	27	67	598_1	598
541	9.01667	8.6	153	2519	2.519	2569	2.569	28	67.8	598_1	598
543	9.05	8.6	153	2632	2.632	2679	2.679	29	71.3	598_1	598
545	9.08333	8.6	153	2666	2.666	2746	2.746	32	75.3	598_1	598
547	9.11667	8.6	153	2712	2.712	2835	2.835	34	79.5	598_1	598
548	9.13333	8.6	153	2713	2.713	2836	2.836	34	79.5	598_1	598
550	9.16667	8.6	153	2636	2.636	2804	2.804	35	80.8	598_1	598
551	9.18333	8.6	154	2614	2.614	2791	2.791	36	80.1	598_1	598
553	9.21667	8.6	154	2601	2.601	2803	2.803	35	80	598_1	598
555	9.25	8.6	155	2555	2.555	2756	2.756	35	79.2	598_1	598
557	9.28333	8.6	156	2589	2.589	2803	2.803	35	80	598_1	598
559	9.31667	8.6	156	2611	2.611	2827	2.827	35	80.3	598_1	598
560	9.33333	8.6	157	2651	2.651	2887	2.887	34	81.7	598_1	598
562	9.36667	8.6	158	2672	2.672	2924	2.924	34	82.4	598_1	598
564	9.4	8.6	159	2660	2.66	2929	2.929	33	82.4	598_1	598
566	9.43333	8.6	159	2639	2.639	2929	2.929	34	82.9	598_1	598
567	9.45	8.6	160	2639	2.639	2929	2.929	34	82.9	598_1	598
569	9.48333	9	160	2633	2.633	2936	2.936	35	83.6	598_1	598
571	9.51667	9	160	2633	2.633	2936	2.936	35	83.6	598_1	598
572	9.53333	9	160	2608	2.608	2914	2.914	35	83.3	598_1	598
574	9.56667	9	160	2653	2.653	2967	2.967	36	85	598_1	598
575	9.58333	9	160	2695	2.695	3021	3.021	36	87	598_1	598
577	9.61667	9	160	2751	2.751	3085	3.085	37	89.2	598_1	598
579	9.65	9	160	2773	2.773	3127	3.127	37	91.1	598_1	598
580	9.66667	9	161	2794	2.794	3161	3.161	38	92.7	598_1	598
582	9.7	9	161	2757	2.757	3137	3.137	38	92	598_1	598
583	9.71667	9	161	2761	2.761	3146	3.146	38	93	598_1	598
585	9.75	9	161	2713	2.713	3102	3.102	38	91.7	598_1	598
587	9.78333	9	161	2687	2.687	3085	3.085	37	90.8	598_1	598
589	9.81667	9	162	2642	2.642	3029	3.029	36	87.2	598_1	598
591	9.85	9	162	2653	2.653	3036	3.036	36	87.3	598_1	598
592	9.86667	9	163	2703	2.703	3081	3.081	35	86.4	598_1	598
594	9.9	9	163	2699	2.699	3072	3.072	35	85.9	598_1	598
596	9.93333	9	163	2740	2.74	3099	3.099	34	85.7	598_1	598
597	9.95	9	163	2760	2.76	3134	3.134	34	86.7	598_1	598
599	9.98333	9.5	163	2828	2.828	3234	3.234	36	90.9	598_1	598
600	10	9.5	163	2859	2.859	3294	3.294	37	93.5	598_1	598
602	10.0333	9.5	163	2852	2.852	3329	3.329	38	96.7	598_1	598
603	10.05	9.5	163	2819	2.819	3337	3.337	39	98.2	598_1	598
605	10.0833	9.5	163	2843	2.843	3362	3.362	39	98.2	598_1	598
606	10.1	9.5	163	2800	2.8	3317	3.317	38	97.1	598_1	598
608	10.1333	9.5	163	2819	2.819	3357	3.357	39	97.6	598_1	598
609	10.15	9.5	163	2827	2.827	3382	3.382	39	98.2	598_1	598
611	10.1833	9.5	163	2828	2.828	3387	3.387	38	97.9	598_1	598
613	10.2167	9.5	163	2825	2.825	3384	3.384	38	97.8	598_1	598
614	10.2333	9.5	163	2847	2.847	3412	3.412	39	98.3	598_1	598
616	10.2667	9.5	163	2854	2.854	3424	3.424	39	98.8	598_1	598
617	10.2833	9.5	164	2878	2.878	3459	3.459	40	99.7	598_1	598
618	10.3	9.5	164	2886	2.886	3492	3.492	41	101.4	598_1	598
620	10.3333	9.5	164	2860	2.86	3484	3.484	41	101.8	598_1	598
621	10.35	9.5	165	2860	2.86	3484	3.484	41	101.8	598_1	598
623	10.3833	9.5	165	2861	2.861	3503	3.503	42	102.9	598_1	598
624	10.4	9.5	165	2850	2.85	3505	3.505	42	102.6	598_1	598
625	10.4167	9.5	165	2846	2.846	3516	3.516	43	103.7	598_1	598
627	10.45	9.5	165	2833	2.833	3498	3.498	43	102.8	598_1	598
628	10.4667	9.5	165	2822	2.822	3486	3.486	42	102	598_1	598
630	10.5	9.5	165	2865	2.865	3540	3.54	42	102.5	598_1	598
631	10.5167	10.1	166	2873	2.873	3572	3.572	42	103.5	598_1	598
633	10.55	10.1	166	2865	2.865	3574	3.574	42	103.5	598_1	598
634	10.5667	10.1	166	2908	2.908	3600	3.6	42	103.6	598_1	598
635	10.5833	10.1	166	2875	2.875	3590	3.59	44	105.3	598_1	598
636	10.6	10.1	166	2860	2.86	3594	3.594	45	106.2	598_1	598
637	10.6167	10.1	166	2877	2.877	3634	3.634	46	107.7	598_1	598
639	10.65	10.1	166	2839	2.839	3611	3.611	47	108.4	598_1	598
640	10.6667	10.1	166	2849	2.849	3615	3.615	47	108.4	598_1	598
641	10.6833	10.1	166	2836	2.836	3617	3.617	48	108.9	598_1	598
643	10.7167	10.1	166	2642	2.642	3325	3.325	43	97.7	598_1	598
645	10.75	10.1	166	2569	2.569	3203	3.203	40	92.6	598_1	598
647	10.7833	10.1	166	2427	2.427	3004	3.004	37	86.6	598_1	598
649	10.8167	4	165	2372	2.372	2913	2.913	34	81.6	598_1	598
651	10.85	4	165	2319	2.319	2804	2.804	32	75.7	598_1	598
653	10.8833	4	164	2198	2.198	2665	2.665	34	72.9	598_1	598
655	10.9167	4	163	2337	2.337	2804	2.804	33	74.5	598_1	598
657	10.95	4	162	2404	2.404	2890	2.89	33	76	598_1	598
659	10.9833	4	161	2320	2.32	2810	2.81	32	73.9	598_1	598
661	11.0167	4	159	2262	2.262	2738	2.738	31	70.8	598_1	598
663	11.05	4	157	2112	2.112	2565	2.565	30	66.2	598_1	598
665	11.0833	4	155	2147	2.147	2606	2.606	31	67.6	598_1	598
666	11.1	4	154	2374	2.374	2876	2.876	33	74	598_1	598
668	11.1333	4	152	2297	2.297	2844	2.844	32	73.9	598_1	598
670	11.1667	4	151	2252	2.252	2838	2.838	32	73.5	598_1	598
672	11.2	4	149	2280	2.28	2913	2.913	32	75.4	598_1	598
674	11.2333	4	149	2399	2.399	3105	3.105	33	79.2	598_1	598
676	11.2667	4	148	2399	2.399	3105	3.105	33	79.2	598_1	598
678	11.3	4	147	2249	2.249	2968	2.968	32	76.7	598_1	598
680	11.3333	4	146	2214	2.214	2963	2.963	31	76.9	598_1	598
682	11.3667	4	144	2150	2.15	2940	2.94	31	76.5	598_1	598
684	11.4	4	143	2075	2.075	2862	2.862	30	75.3	598_1	598
688	11.4667	4	141	1837	1.837	2598	2.598	28	68.3	598_1	598
690	11.5	4	140	1837	1.837	2598	2.598	28	68.3	598_1	598
692	11.5333	4	139	1893	1.893	2701	2.701	29	70.7	598_1	598
694	11.5667	4	138	1947	1.947	2800	2.8	29	73.3	598_1	598
696	11.6	4	137	1694	1.694	2470	2.47	27	64.8	598_1	598
699	11.65	4	136	1623	1.623	2362	2.362	25	60.3	598_1	598
701	11.6833	4	136	1730	1.73	2530	2.53	27	66.3	598_1	598
703	11.7167	4	135	1915	1.915	2804	2.804	30	74.5	598_1	598
705	11.75	4	135	1814	1.814	2693	2.693	29	73.3	598_1	598
706	11.7667	4	135	1692	1.692	2547	2.547	31	71.8	598_1	598
710	11.8333	4	135	1510	1.51	2265	2.265	28	63	598_1	598
713	11.8833	4	134	1501	1.501	2221	2.221	26	60.3	598_1	598
715	11.9167	4	134	1596	1.596	2334	2.334	28	64.1	598_1	598
717	11.95	4	133	1596	1.596	2335	2.335	28	64.1	598_1	598
719	11.9833	4	132	1574	1.574	2295	2.295	28	63.9	598_1	598
721	12.0167	4	131	1512	1.512	2210	2.21	27	62.3	598_1	598
723	12.05	4	131	1505	1.505	2205	2.205	26	61.4	598_1	598
725	12.0833	4	129	1626	1.626	2426	2.426	30	71.3	598_1	598
726	12.1	4	128	1643	1.643	2443	2.443	31	72.6	598_1	598
728	12.1333	4	127	1508	1.508	2304	2.304	31	71.8	598_1	598
730	12.1667	4	126	1453	1.453	2239	2.239	32	70.4	598_1	598
732	12.2	4	125	1440	1.44	2210	2.21	32	69.3	598_1	598
734	12.2333	4	125	1421	1.421	2176	2.176	32	68.6	598_1	598
737	12.2833	4	124	1389	1.389	2117	2.117	33	67.4	598_1	598
738	12.3	4	124	1361	1.361	2063	2.063	33	65.8	598_1	598
741	12.35	4	123	1273	1.273	1943	1.943	29	60.7	598_1	598
746	12.4333	4	122	1209	1.209	1831	1.831	28	55.8	598_1	598
749	12.4833	4	121	1142	1.142	1674	1.674	26	49.7	598_1	598
753	12.55	4	120	1072	1.072	1511	1.511	20	42.4	598_1	598
755	12.5833	4	119	1068	1.068	1499	1.499	21	42.2	598_1	598
758	12.6333	4	118	1035	1.035	1384	1.384	21	39.2	598_1	598
761	12.6833	4	118	1072	1.072	1396	1.396	20	38.6	598_1	598
764	12.7333	4	117	1073	1.073	1352	1.352	19	36.4	598_1	598
766	12.7667	4	116	1154	1.154	1442	1.442	22	39.6	598_1	598
768	12.8	4	116	1308	1.308	1612	1.612	23	43.7	598_1	598
770	12.8333	4	115	1378	1.378	1711	1.711	25	46.9	598_1	598
772	12.8667	4	115	1346	1.346	1708	1.708	25	48.3	598_1	598
774	12.9	4	115	1440	1.44	1861	1.861	29	55.6	598_1	598
776	12.9333	4	115	1427	1.427	1887	1.887	30	58.3	598_1	598
778	12.9667	4	114	1428	1.428	1949	1.949	32	63.1	598_1	598
780	13	4	114	1415	1.415	1963	1.963	31	63.5	598_1	598
782	13.0333	4	113	1302	1.302	1833	1.833	31	61	598_1	598
783	13.05	4	113	1310	1.31	1845	1.845	32	61.6	598_1	598
785	13.0833	4	113	1278	1.278	1803	1.803	32	60	598_1	598
787	13.1167	4	112	1243	1.243	1770	1.77	32	59.4	598_1	598
789	13.15	4	111	1209	1.209	1726	1.726	32	57.4	598_1	598
792	13.2	4	111	1191	1.191	1704	1.704	31	56.5	598_1	598
794	13.2333	4	110	1172	1.172	1678	1.678	29	54.6	598_1	598
797	13.2833	4	109	1153	1.153	1650	1.65	28	53.4	598_1	598
799	13.3167	4	108	1149	1.149	1636	1.636	27	52.6	598_1	598
801	13.35	4	107	1122	1.122	1606	1.606	26	51.4	598_1	598
804	13.4	4	107	1091	1.091	1564	1.564	26	49.8	598_1	598
806	13.4333	4	106	1091	1.091	1564	1.564	26	49.8	598_1	598
808	13.4667	4	106	1084	1.084	1548	1.548	27	50.3	598_1	598
810	13.5	4	105	1088	1.088	1551	1.551	29	50.5	598_1	598
812	13.5333	4	105	1077	1.077	1531	1.531	29	50.3	598_1	598
814	13.5667	4	105	1031	1.031	1458	1.458	27	46.1	598_1	598
816	13.6	4	105	1055	1.055	1476	1.476	28	46.9	598_1	598
818	13.6333	4	105	1091	1.091	1523	1.523	32	50.9	598_1	598
819	13.65	4	105	1039	1.039	1451	1.451	33	49.3	598_1	598
821	13.6833	4	105	1053	1.053	1455	1.455	33	49.5	598_1	598
823	13.7167	4	105	1067	1.067	1455	1.455	34	50.3	598_1	598
825	13.75	4	105	1054	1.054	1433	1.433	33	50	598_1	598
827	13.7833	4	104	1067	1.067	1448	1.448	33	50	598_1	598
829	13.8167	4	104	1037	1.037	1413	1.413	32	48.7	598_1	598
831	13.85	4	104	1036	1.036	1417	1.417	31	48.6	598_1	598
834	13.9	4	104	1036	1.036	1417	1.417	31	48.6	598_1	598
836	13.9333	4	104	1015	1.015	1384	1.384	32	47.9	598_1	598
837	13.95	4	103	1016	1.016	1391	1.391	31	47.9	598_1	598
840	14	4	103	999	0.999	1387	1.387	28	46.4	598_1	598
842	14.0333	4	103	988	0.988	1367	1.367	29	46.1	598_1	598
845	14.0833	4	102	915	0.915	1260	1.26	26	41.4	598_1	598
846	14.1	4	102	905	0.905	1243	1.243	27	41.4	598_1	598
848	14.1333	4	101	928	0.928	1229	1.229	32	42.3	598_1	598
850	14.1667	4	101	962	0.962	1255	1.255	31	42.8	598_1	598
854	14.2333	4	101	875	0.875	1132	1.132	27	38	598_1	598
857	14.2833	4	101	817	0.817	1053	1.053	25	34.9	598_1	598
860	14.3333	4	101	764	0.764	962	0.962	23	31.2	598_1	598
862	14.3667	4	100	900	0.9	1093	1.093	23	33.7	598_1	598
867	14.45	4	100	778	0.778	930	0.93	18	27.7	598_1	598
870	14.5	4	101	746	0.746	887	0.887	18	26.4	598_1	598
