# Supplementary material for: On the development of diagnostic support algorithms based on CPET biosignals data via machine learning and wavelets
Source: PeerJ journal article supplement (doi:10.7717/peerj-cs.2474), 2025-01-30
Supplement: raw_data.zip [file Subject_40.xlsx]

## Sheet: Folha1
time	time	Speed	HR	VO2	VO2	VCO2	VCO2	RR	VE	ID_test	ID
	min	km/h	/min	ml/min	L/min	ml/min	L/min	/min	L/min
0	0	5		323	0.323	226	0.226	22	11.1	389_1	389
2	0.0333333	5		570	0.57	374	0.374	39	17.2	389_1	389
4	0.0666667	5	16	569	0.569	374	0.374	39	17.2	389_1	389
7	0.116667	5		710	0.71	473	0.473	26	18.8	389_1	389
11	0.183333	5		743	0.743	494	0.494	27	19.6	389_1	389
13	0.216667	5		735	0.735	497	0.497	28	20	389_1	389
14	0.233333	5		701	0.701	475	0.475	29	19.6	389_1	389
17	0.283333	5	78	702	0.702	476	0.476	29	19.6	389_1	389
22	0.366667	5	78	785	0.785	542	0.542	22	20.6	389_1	389
27	0.45	5	78	906	0.906	650	0.65	18	24.2	389_1	389
31	0.516667	5	78	926	0.926	672	0.672	18	24.7	389_1	389
33	0.55	5	78	817	0.817	579	0.579	21	21.3	389_1	389
40	0.666667	5	78	908	0.908	668	0.668	17	24.3	389_1	389
48	0.8	5	77	974	0.974	707	0.707	13	25.1	389_1	389
53	0.883333	5	77	1052	1.052	755	0.755	12	26.4	389_1	389
60	1	5	76	1066	1.066	773	0.773	11	27.4	389_1	389
65	1.08333	5	76	1005	1.005	745	0.745	11	26.3	389_1	389
72	1.2	5	74	1003	1.003	742	0.742	11	26.3	389_1	389
74	1.23333	5	74	950	0.95	701	0.701	10	24.2	389_1	389
77	1.28333	5	73	864	0.864	629	0.629	11	21.3	389_1	389
79	1.31667	5	71	819	0.819	592	0.592	13	19.9	389_1	389
82	1.36667	5	70	814	0.814	554	0.554	15	18	389_1	389
84	1.4	5	70	812	0.812	554	0.554	15	18	389_1	389
86	1.43333	5	70	861	0.861	540	0.54	18	17.7	389_1	389
87	1.45	5	71	1054	1.054	636	0.636	26	22.7	389_1	389
89	1.48333	5	71	1296	1.296	795	0.795	29	29.8	389_1	389
91	1.51667	5	71	1357	1.357	867	0.867	30	33.5	389_1	389
93	1.55	5	72	1360	1.36	868	0.868	30	33.5	389_1	389
95	1.58333	5	73	1364	1.364	917	0.917	33	36.6	389_1	389
97	1.61667	5	73	1173	1.173	828	0.828	31	33.6	389_1	389
102	1.7	5	73	1025	1.025	739	0.739	24	28.5	389_1	389
105	1.75	5	73	1088	1.088	784	0.784	22	28.9	389_1	389
109	1.81667	5	73	1031	1.031	761	0.761	21	28	389_1	389
111	1.85	5	73	989	0.989	733	0.733	19	26.1	389_1	389
117	1.95	5	72	988	0.988	733	0.733	19	26.1	389_1	389
122	2.03333	5	72	1083	1.083	794	0.794	18	27.9	389_1	389
129	2.15	5	73	1132	1.132	821	0.821	15	28	389_1	389
134	2.23333	5	72	1151	1.151	839	0.839	15	28.3	389_1	389
141	2.35	5	72	1157	1.157	832	0.832	15	28	389_1	389
143	2.38333	5	71	1132	1.132	796	0.796	16	26.9	389_1	389
145	2.41667	5	70	1139	1.139	791	0.791	16	27	389_1	389
147	2.45	5	70	1139	1.139	791	0.791	16	27	389_1	389
150	2.5	5	68	1023	1.023	715	0.715	18	24.7	389_1	389
152	2.53333	5	67	931	0.931	645	0.645	22	23.4	389_1	389
154	2.56667	5	67	915	0.915	598	0.598	29	23	389_1	389
156	2.6	5	67	889	0.889	574	0.574	31	22.6	389_1	389
157	2.61667	5	66	888	0.888	574	0.574	31	22.6	389_1	389
160	2.66667	5	66	912	0.912	583	0.583	32	22.8	389_1	389
161	2.68333	5	66	904	0.904	574	0.574	33	22.7	389_1	389
163	2.71667	5	66	971	0.971	620	0.62	31	23.4	389_1	389
165	2.75	5	66	1068	1.068	690	0.69	31	25.1	389_1	389
167	2.78333	5	67	1137	1.137	749	0.749	29	27.4	389_1	389
170	2.83333	5	69	1124	1.124	754	0.754	27	26.8	389_1	389
178	2.96667	5.1	70	1014	1.014	714	0.714	17	25.3	389_1	389
182	3.03333	5.2	71	1073	1.073	752	0.752	15	25.2	389_1	389
187	3.11667	5.2	72	1246	1.246	842	0.842	22	27.5	389_1	389
191	3.18333	5.3	73	1218	1.218	861	0.861	19	28.4	389_1	389
195	3.25	5.4	74	1189	1.189	871	0.871	17	29	389_1	389
200	3.33333	5.5	74	1062	1.062	793	0.793	13	26.6	389_1	389
203	3.38333	5.5	74	1118	1.118	844	0.844	13	28.3	389_1	389
207	3.45	5.6	74	1200	1.2	904	0.904	15	29.7	389_1	389
210	3.5	5.6	75	1172	1.172	908	0.908	17	31.4	389_1	389
212	3.53333	5.7	76	1111	1.111	858	0.858	19	30	389_1	389
218	3.63333	5.8	76	974	0.974	761	0.761	17	27	389_1	389
221	3.68333	5.8	77	1042	1.042	775	0.775	18	26.7	389_1	389
224	3.73333	5.9	77	1190	1.19	851	0.851	21	28.9	389_1	389
227	3.78333	5.9	77	1189	1.189	850	0.85	21	28.9	389_1	389
229	3.81667	5.9	77	1253	1.253	889	0.889	24	30.8	389_1	389
231	3.85	6	77	1264	1.264	892	0.892	25	31	389_1	389
233	3.88333	6	77	1268	1.268	900	0.9	25	31.6	389_1	389
237	3.95	6.1	78	1268	1.268	900	0.9	25	31.6	389_1	389
242	4.03333	6.2	78	1282	1.282	943	0.943	21	32	389_1	389
248	4.13333	6.3	80	1222	1.222	914	0.914	17	29.5	389_1	389
255	4.25	6.4	82	1133	1.133	838	0.838	17	26.6	389_1	389
260	4.33333	6.5	83	1075	1.075	784	0.784	14	23.6	389_1	389
264	4.4	6.5	84	1074	1.074	775	0.775	13	22.8	389_1	389
266	4.43333	6.6	85	1145	1.145	832	0.832	11	24.1	389_1	389
269	4.48333	6.6	86	1211	1.211	881	0.881	12	25.7	389_1	389
273	4.55	6.7	87	1180	1.18	845	0.845	14	24.8	389_1	389
279	4.65	6.8	89	1227	1.227	886	0.886	14	25.9	389_1	389
285	4.75	6.9	90	1287	1.287	939	0.939	15	27.5	389_1	389
289	4.81667	7	92	1341	1.341	1006	1.006	14	29.9	389_1	389
294	4.9	7	93	1359	1.359	1038	1.038	13	31.1	389_1	389
298	4.96667	7.1	93	1330	1.33	1027	1.027	12	30.4	389_1	389
301	5.01667	7.2	93	1329	1.329	1026	1.026	12	30.4	389_1	389
302	5.03333	7.2	93	1282	1.282	984	0.984	14	29.1	389_1	389
303	5.05	7.2	93	1313	1.313	1015	1.015	15	30.7	389_1	389
304	5.06667	7.2	93	1278	1.278	989	0.989	20	31.1	389_1	389
306	5.1	7.2	93	1254	1.254	945	0.945	26	29.9	389_1	389
308	5.13333	7.3	93	1208	1.208	853	0.853	32	27.5	389_1	389
312	5.2	7.3	93	1542	1.542	1052	1.052	34	34.7	389_1	389
315	5.25	7.4	94	1670	1.67	1182	1.182	27	38.1	389_1	389
318	5.3	7.4	96	1704	1.704	1246	1.246	22	39.3	389_1	389
322	5.36667	7.5	97	1699	1.699	1269	1.269	19	39.6	389_1	389
325	5.41667	7.5	99	1719	1.719	1323	1.323	18	41.8	389_1	389
327	5.45	7.6	101	1595	1.595	1236	1.236	19	38.9	389_1	389
330	5.5	7.6	103	1655	1.655	1298	1.298	18	40.8	389_1	389
333	5.55	7.7	104	1522	1.522	1202	1.202	19	37.7	389_1	389
334	5.56667	7.7	105	1523	1.523	1202	1.202	19	37.7	389_1	389
337	5.61667	7.7	106	1560	1.56	1224	1.224	20	38.3	389_1	389
339	5.65	7.8	107	1578	1.578	1235	1.235	21	38.8	389_1	389
343	5.71667	7.8	108	1586	1.586	1228	1.228	21	37.4	389_1	389
345	5.75	7.9	110	1733	1.733	1346	1.346	21	41	389_1	389
348	5.8	7.9	111	1787	1.787	1408	1.408	22	42.9	389_1	389
350	5.83333	8	112	1856	1.856	1480	1.48	24	46.8	389_1	389
352	5.86667	8	112	1816	1.816	1461	1.461	24	46.8	389_1	389
355	5.91667	8	113	1796	1.796	1468	1.468	25	47.7	389_1	389
357	5.95	8.1	114	1810	1.81	1490	1.49	25	48.6	389_1	389
360	6	8.1	115	1842	1.842	1542	1.542	25	50.5	389_1	389
362	6.03333	8.2	116	1860	1.86	1564	1.564	25	50.9	389_1	389
365	6.08333	8.2	117	1819	1.819	1532	1.532	24	49.6	389_1	389
367	6.11667	8.3	118	1829	1.829	1544	1.544	24	49.1	389_1	389
370	6.16667	8.3	118	1844	1.844	1564	1.564	24	49.6	389_1	389
372	6.2	8.3	119	1886	1.886	1598	1.598	26	50.9	389_1	389
374	6.23333	8.4	120	1911	1.911	1627	1.627	26	51.9	389_1	389
377	6.28333	8.4	120	1886	1.886	1612	1.612	26	51.8	389_1	389
379	6.31667	8.4	121	1925	1.925	1649	1.649	26	52.6	389_1	389
381	6.35	8.5	121	1968	1.968	1685	1.685	26	53.4	389_1	389
384	6.4	8.5	123	1977	1.977	1700	1.7	26	53.9	389_1	389
386	6.43333	8.6	124	1967	1.967	1694	1.694	26	53.4	389_1	389
389	6.48333	8.6	125	1968	1.968	1699	1.699	25	52.5	389_1	389
391	6.51667	8.7	126	1968	1.968	1698	1.698	25	52.5	389_1	389
393	6.55	8.7	127	2019	2.019	1744	1.744	27	54.8	389_1	389
396	6.6	8.7	127	2018	2.018	1744	1.744	27	55.2	389_1	389
398	6.63333	8.8	128	2034	2.034	1756	1.756	27	55	389_1	389
400	6.66667	8.8	129	2054	2.054	1777	1.777	27	55.3	389_1	389
402	6.7	8.8	129	2092	2.092	1810	1.81	27	56.4	389_1	389
404	6.73333	8.9	130	2089	2.089	1812	1.812	28	56.7	389_1	389
406	6.76667	8.9	130	2090	2.09	1812	1.812	28	56.7	389_1	389
407	6.78333	8.9	130	2058	2.058	1780	1.78	30	56.3	389_1	389
409	6.81667	8.9	130	2104	2.104	1811	1.811	32	57	389_1	389
411	6.85	9	130	2114	2.114	1825	1.825	33	58.2	389_1	389
412	6.86667	9	130	2163	2.163	1866	1.866	36	60.5	389_1	389
416	6.93333	9.1	130	2153	2.153	1887	1.887	31	60.1	389_1	389
419	6.98333	9.1	130	2153	2.153	1886	1.886	31	60.1	389_1	389
422	7.03333	9.2	130	2139	2.139	1846	1.846	28	57	389_1	389
425	7.08333	9.2	130	2164	2.164	1838	1.838	24	54	389_1	389
428	7.13333	9.3	130	2207	2.207	1848	1.848	22	53.6	389_1	389
430	7.16667	9.3	129	2235	2.235	1856	1.856	22	53.3	389_1	389
433	7.21667	9.3	129	2144	2.144	1782	1.782	20	50.8	389_1	389
436	7.26667	9.4	129	2158	2.158	1753	1.753	21	49	389_1	389
439	7.31667	9.4	129	2245	2.245	1817	1.817	21	50.7	389_1	389
441	7.35	9.5	129	2265	2.265	1840	1.84	22	51.3	389_1	389
444	7.4	9.5	129	2251	2.251	1841	1.841	22	52.1	389_1	389
447	7.45	9.6	129	2197	2.197	1805	1.805	22	50.3	389_1	389
449	7.48333	9.6	129	2184	2.184	1790	1.79	22	49.5	389_1	389
452	7.53333	9.7	130	2218	2.218	1824	1.824	22	50.9	389_1	389
455	7.58333	9.7	130	2242	2.242	1859	1.859	22	52.3	389_1	389
458	7.63333	9.8	130	2228	2.228	1858	1.858	22	52.4	389_1	389
460	7.66667	9.8	131	2224	2.224	1861	1.861	22	52.7	389_1	389
463	7.71667	9.8	131	2225	2.225	1862	1.862	22	53.3	389_1	389
466	7.76667	9.9	131	2263	2.263	1895	1.895	22	54	389_1	389
468	7.8	9.9	132	2272	2.272	1910	1.91	22	55.1	389_1	389
471	7.85	10	132	2271	2.271	1914	1.914	22	55.3	389_1	389
474	7.9	10	132	2263	2.263	1913	1.913	22	55	389_1	389
477	7.95	10.1	133	2295	2.295	1925	1.925	22	54.9	389_1	389
479	7.98333	10.1	134	2296	2.296	1924	1.924	22	55	389_1	389
482	8.03333	10.2	134	2314	2.314	1933	1.933	22	55	389_1	389
485	8.08333	10.2	135	2325	2.325	1944	1.944	22	55.2	389_1	389
487	8.11667	10.3	136	2313	2.313	1942	1.942	22	54.9	389_1	389
490	8.16667	10.3	136	2294	2.294	1918	1.918	23	53.6	389_1	389
493	8.21667	10.3	136	2306	2.306	1912	1.912	23	53.2	389_1	389
495	8.25	10.4	136	2313	2.313	1920	1.92	23	53.5	389_1	389
498	8.3	10.4	136	2298	2.298	1896	1.896	22	52.8	389_1	389
501	8.35	10.5	136	2308	2.308	1890	1.89	22	52.3	389_1	389
503	8.38333	10.5	136	2301	2.301	1889	1.889	22	51.6	389_1	389
506	8.43333	10.6	136	2338	2.338	1912	1.912	22	52.4	389_1	389
508	8.46667	10.6	136	2345	2.345	1923	1.923	23	53.1	389_1	389
511	8.51667	10.7	136	2345	2.345	1924	1.924	23	54.2	389_1	389
514	8.56667	10.7	136	2353	2.353	1940	1.94	23	54.9	389_1	389
516	8.6	10.7	137	2384	2.384	1983	1.983	23	56.4	389_1	389
519	8.65	10.8	137	2407	2.407	2020	2.02	23	58.1	389_1	389
522	8.7	10.8	138	2438	2.438	2057	2.057	22	59.4	389_1	389
524	8.73333	10.9	138	2417	2.417	2040	2.04	22	58.8	389_1	389
527	8.78333	10.9	138	2435	2.435	2059	2.059	22	59	389_1	389
530	8.83333	11	138	2429	2.429	2061	2.061	23	58.7	389_1	389
532	8.86667	11	138	2441	2.441	2067	2.067	23	58.2	389_1	389
535	8.91667	11	138	2412	2.412	2036	2.036	23	56.7	389_1	389
537	8.95	11.1	138	2419	2.419	2040	2.04	23	56.8	389_1	389
539	8.98333	11.1	139	2446	2.446	2071	2.071	24	57.9	389_1	389
541	9.01667	11.2	139	2457	2.457	2083	2.083	24	58.5	389_1	389
544	9.06667	11.2	140	2458	2.458	2089	2.089	24	58.2	389_1	389
547	9.11667	11.2	141	2458	2.458	2089	2.089	24	58.2	389_1	389
549	9.15	11.3	141	2445	2.445	2079	2.079	24	58	389_1	389
552	9.2	11.3	141	2488	2.488	2123	2.123	24	59.8	389_1	389
555	9.25	11.4	141	2453	2.453	2089	2.089	23	58.4	389_1	389
557	9.28333	11.4	141	2437	2.437	2083	2.083	23	58.2	389_1	389
560	9.33333	11.5	141	2430	2.43	2071	2.071	23	57.3	389_1	389
562	9.36667	11.5	141	2455	2.455	2093	2.093	23	58.6	389_1	389
565	9.41667	11.6	141	2511	2.511	2153	2.153	23	60.8	389_1	389
568	9.46667	11.6	141	2496	2.496	2143	2.143	23	60.2	389_1	389
570	9.5	11.6	142	2518	2.518	2164	2.164	23	60.7	389_1	389
572	9.53333	11.7	142	2583	2.583	2222	2.222	24	62.5	389_1	389
573	9.55	11.7	142	2622	2.622	2270	2.27	26	65.1	389_1	389
575	9.58333	11.7	143	2687	2.687	2364	2.364	27	69.7	389_1	389
577	9.61667	11.8	143	2685	2.685	2384	2.384	29	71.6	389_1	389
579	9.65	11.8	144	2723	2.723	2432	2.432	31	74.5	389_1	389
581	9.68333	11.8	144	2748	2.748	2477	2.477	31	76.4	389_1	389
583	9.71667	11.8	145	2696	2.696	2446	2.446	31	76.3	389_1	389
585	9.75	11.9	145	2638	2.638	2414	2.414	31	75.1	389_1	389
586	9.76667	11.9	145	2614	2.614	2398	2.398	31	73.5	389_1	389
588	9.8	11.9	145	2658	2.658	2427	2.427	33	75	389_1	389
589	9.81667	12	145	2699	2.699	2475	2.475	35	77.2	389_1	389
591	9.85	12	145	2622	2.622	2415	2.415	33	74.9	389_1	389
592	9.86667	12	145	2651	2.651	2420	2.42	35	75.1	389_1	389
594	9.9	12	146	2691	2.691	2450	2.45	38	76.8	389_1	389
595	9.91667	12.1	145	2715	2.715	2473	2.473	41	79.2	389_1	389
596	9.93333	12.1	145	2763	2.763	2509	2.509	45	81	389_1	389
598	9.96667	12.1	145	2739	2.739	2503	2.503	45	81	389_1	389
599	9.98333	12.1	145	2712	2.712	2497	2.497	45	81.5	389_1	389
600	10	12.1	145	2760	2.76	2552	2.552	45	84	389_1	389
602	10.0333	12.2	145	2725	2.725	2524	2.524	45	83.1	389_1	389
603	10.05	12.2	145	2738	2.738	2550	2.55	45	84.8	389_1	389
604	10.0667	12.2	146	2754	2.754	2586	2.586	45	86.9	389_1	389
605	10.0833	12.2	146	2789	2.789	2614	2.614	45	87.8	389_1	389
607	10.1167	12.2	147	2748	2.748	2589	2.589	46	87.4	389_1	389
608	10.1333	12.3	147	2722	2.722	2567	2.567	45	86.9	389_1	389
609	10.15	12.3	147	2667	2.667	2519	2.519	45	84.9	389_1	389
611	10.1833	12.3	148	2655	2.655	2505	2.505	46	84.6	389_1	389
612	10.2	12.3	148	2644	2.644	2500	2.5	46	84.4	389_1	389
613	10.2167	12.4	148	2633	2.633	2489	2.489	46	83.6	389_1	389
615	10.25	12.4	148	2617	2.617	2479	2.479	46	83.5	389_1	389
616	10.2667	12.4	149	2640	2.64	2496	2.496	46	83.5	389_1	389
617	10.2833	12.4	149	2659	2.659	2520	2.52	46	84.9	389_1	389
618	10.3	12.4	150	2659	2.659	2520	2.52	46	84.9	389_1	389
620	10.3333	12.5	150	2671	2.671	2537	2.537	46	85.8	389_1	389
621	10.35	12.5	150	2665	2.665	2537	2.537	46	86.1	389_1	389
623	10.3833	12.5	150	2668	2.668	2545	2.545	46	86.4	389_1	389
624	10.4	12.5	150	2698	2.698	2571	2.571	45	87.2	389_1	389
625	10.4167	12.6	150	2707	2.707	2576	2.576	45	87.3	389_1	389
626	10.4333	12.6	150	2710	2.71	2565	2.565	45	86.1	389_1	389
628	10.4667	12.6	151	2722	2.722	2581	2.581	46	86.5	389_1	389
629	10.4833	12.6	151	2722	2.722	2579	2.579	46	86	389_1	389
630	10.5	12.6	150	2748	2.748	2598	2.598	46	86.2	389_1	389
632	10.5333	12.7	150	2756	2.756	2597	2.597	47	86.7	389_1	389
633	10.55	12.7	150	2785	2.785	2635	2.635	46	87.7	389_1	389
634	10.5667	12.7	151	2776	2.776	2617	2.617	46	86.2	389_1	389
636	10.6	12.7	151	2785	2.785	2643	2.643	46	87.9	389_1	389
637	10.6167	12.8	151	2785	2.785	2649	2.649	46	89.4	389_1	389
638	10.6333	12.8	151	2759	2.759	2629	2.629	46	89.7	389_1	389
639	10.65	12.8	151	2740	2.74	2615	2.615	45	89.5	389_1	389
641	10.6833	12.8	151	2701	2.701	2579	2.579	45	88.1	389_1	389
642	10.7	12.8	151	2701	2.701	2579	2.579	45	88.1	389_1	389
643	10.7167	12.9	152	2709	2.709	2589	2.589	46	88.7	389_1	389
645	10.75	12.9	152	2720	2.72	2601	2.601	46	89	389_1	389
646	10.7667	12.9	153	2729	2.729	2616	2.616	46	89.4	389_1	389
647	10.7833	12.9	153	2733	2.733	2622	2.622	46	89.2	389_1	389
649	10.8167	13	153	2754	2.754	2648	2.648	46	90.4	389_1	389
650	10.8333	13	153	2775	2.775	2656	2.656	46	90.9	389_1	389
651	10.85	13	153	2763	2.763	2643	2.643	46	91.3	389_1	389
653	10.8833	13	153	2767	2.767	2652	2.652	45	91.1	389_1	389
654	10.9	13	154	2779	2.779	2666	2.666	46	91.4	389_1	389
655	10.9167	13.1	154	2778	2.778	2667	2.667	46	91.6	389_1	389
656	10.9333	13.1	154	2798	2.798	2682	2.682	46	92.5	389_1	389
658	10.9667	13.1	154	2804	2.804	2681	2.681	46	92.5	389_1	389
659	10.9833	13.1	154	2790	2.79	2685	2.685	46	92.5	389_1	389
660	11	13.1	154	2827	2.827	2710	2.71	46	92.3	389_1	389
662	11.0333	13.2	154	2865	2.865	2738	2.738	47	93.9	389_1	389
663	11.05	13.2	154	2846	2.846	2717	2.717	46	92.4	389_1	389
664	11.0667	13.2	154	2837	2.837	2694	2.694	46	90.6	389_1	389
665	11.0833	13.2	154	2823	2.823	2665	2.665	46	88.3	389_1	389
667	11.1167	13.3	154	2832	2.832	2656	2.656	46	87.6	389_1	389
668	11.1333	13.3	154	2865	2.865	2685	2.685	46	89.2	389_1	389
669	11.15	13.3	154	2844	2.844	2663	2.663	46	88.3	389_1	389
671	11.1833	13.3	154	2834	2.834	2662	2.662	46	88.1	389_1	389
672	11.2	13.3	154	2820	2.82	2642	2.642	47	87.3	389_1	389
673	11.2167	13.4	154	2849	2.849	2668	2.668	46	89	389_1	389
674	11.2333	13.4	154	2860	2.86	2685	2.685	46	89.5	389_1	389
676	11.2667	13.4	154	2869	2.869	2704	2.704	46	90.4	389_1	389
677	11.2833	13.4	154	2843	2.843	2680	2.68	46	89.4	389_1	389
678	11.3	13.4	154	2869	2.869	2714	2.714	46	90.1	389_1	389
680	11.3333	13.5	154	2844	2.844	2694	2.694	46	88.7	389_1	389
681	11.35	13.5	154	2878	2.878	2739	2.739	46	89.8	389_1	389
682	11.3667	13.5	154	2861	2.861	2731	2.731	46	88.9	389_1	389
684	11.4	13.5	154	2861	2.861	2738	2.738	46	89.2	389_1	389
685	11.4167	13.6	154	2861	2.861	2738	2.738	46	89.2	389_1	389
686	11.4333	13.6	154	2879	2.879	2765	2.765	46	91.2	389_1	389
687	11.45	13.6	155	2858	2.858	2749	2.749	47	91.7	389_1	389
689	11.4833	13.6	155	2858	2.858	2749	2.749	47	91.7	389_1	389
690	11.5	13.6	156	2824	2.824	2720	2.72	47	90.9	389_1	389
691	11.5167	13.7	156	2835	2.835	2733	2.733	47	91.8	389_1	389
692	11.5333	13.7	156	2819	2.819	2717	2.717	48	91.7	389_1	389
694	11.5667	13.7	156	2825	2.825	2719	2.719	47	91.8	389_1	389
695	11.5833	13.7	156	2808	2.808	2698	2.698	47	90.7	389_1	389
696	11.6	13.7	156	2789	2.789	2685	2.685	47	89.9	389_1	389
697	11.6167	13.8	156	2811	2.811	2709	2.709	47	91	389_1	389
699	11.65	13.8	156	2817	2.817	2711	2.711	48	91	389_1	389
700	11.6667	13.8	156	2775	2.775	2672	2.672	48	89.4	389_1	389
701	11.6833	13.8	156	2811	2.811	2712	2.712	48	90.7	389_1	389
702	11.7	13.8	156	2807	2.807	2702	2.702	48	89.6	389_1	389
704	11.7333	13.9	156	2844	2.844	2740	2.74	48	90.8	389_1	389
705	11.75	13.9	156	2857	2.857	2743	2.743	48	89.6	389_1	389
706	11.7667	13.9	156	2854	2.854	2738	2.738	48	89	389_1	389
707	11.7833	13.9	156	2865	2.865	2753	2.753	48	89.5	389_1	389
709	11.8167	14	156	2873	2.873	2771	2.771	48	90.8	389_1	389
710	11.8333	14	156	2837	2.837	2738	2.738	50	89.6	389_1	389
711	11.85	14	157	2842	2.842	2746	2.746	48	89.9	389_1	389
712	11.8667	14	157	2863	2.863	2764	2.764	53	91.4	389_1	389
713	11.8833	14	157	2863	2.863	2764	2.764	53	91.4	389_1	389
714	11.9	14	157	2826	2.826	2749	2.749	52	90.5	389_1	389
715	11.9167	14.1	156	2790	2.79	2719	2.719	52	89.2	389_1	389
717	11.95	14.1	156	2783	2.783	2720	2.72	52	88.5	389_1	389
718	11.9667	14.1	156	2750	2.75	2695	2.695	51	87.9	389_1	389
719	11.9833	14.1	156	2729	2.729	2679	2.679	47	85.5	389_1	389
721	12.0167	14.1	156	2729	2.729	2678	2.678	47	85.5	389_1	389
722	12.0333	14.2	156	2795	2.795	2740	2.74	47	86.3	389_1	389
723	12.05	14.2	156	2818	2.818	2750	2.75	48	86.9	389_1	389
724	12.0667	14.2	156	2839	2.839	2772	2.772	48	87.7	389_1	389
725	12.0833	14.2	156	2810	2.81	2737	2.737	48	86.1	389_1	389
727	12.1167	14.3	156	2821	2.821	2757	2.757	48	87.4	389_1	389
728	12.1333	14.3	156	2788	2.788	2733	2.733	48	86.8	389_1	389
729	12.15	14.3	156	2766	2.766	2721	2.721	48	86.8	389_1	389
730	12.1667	14.3	156	2766	2.766	2721	2.721	48	86.8	389_1	389
732	12.2	14.3	158	2742	2.742	2701	2.701	49	85.8	389_1	389
733	12.2167	14.4	161	2711	2.711	2662	2.662	49	83.7	389_1	389
734	12.2333	14.4	161	2647	2.647	2607	2.607	47	82.8	389_1	389
735	12.25	5	161	2704	2.704	2655	2.655	48	84.8	389_1	389
736	12.2667	5	161	2684	2.684	2632	2.632	47	84.8	389_1	389
738	12.3	5	160	2628	2.628	2591	2.591	45	85.8	389_1	389
739	12.3167	5	158	2564	2.564	2566	2.566	45	87.6	389_1	389
740	12.3333	5	155	2477	2.477	2536	2.536	43	90	389_1	389
742	12.3667	5	155	2445	2.445	2566	2.566	43	95.1	389_1	389
743	12.3833	5	154	2447	2.447	2568	2.568	43	95.1	389_1	389
746	12.4333	5	154	2313	2.313	2468	2.468	41	91.5	389_1	389
747	12.45	5	154	2208	2.208	2435	2.435	40	92.9	389_1	389
748	12.4667	5	154	2126	2.126	2416	2.416	43	95.4	389_1	389
749	12.4833	5	154	2113	2.113	2398	2.398	44	94.1	389_1	389
750	12.5	5	154	2074	2.074	2362	2.362	47	92.6	389_1	389
751	12.5167	5	154	2076	2.076	2336	2.336	49	90.4	389_1	389
752	12.5333	5	154	2138	2.138	2383	2.383	53	91.2	389_1	389
754	12.5667	5	154	2182	2.182	2440	2.44	49	92.1	389_1	389
755	12.5833	5	154	2216	2.216	2469	2.469	51	94.7	389_1	389
756	12.6	5	154	2276	2.276	2515	2.515	52	93.7	389_1	389
757	12.6167	5	153	2386	2.386	2594	2.594	48	91.4	389_1	389
759	12.65	5	153	2448	2.448	2665	2.665	47	90.7	389_1	389
760	12.6667	5	152	2539	2.539	2745	2.745	48	91.4	389_1	389
761	12.6833	5	150	2647	2.647	2841	2.841	51	92.5	389_1	389
763	12.7167	5	149	2646	2.646	2840	2.84	51	92.5	389_1	389
764	12.7333	5	147	2694	2.694	2871	2.871	50	90.8	389_1	389
765	12.75	5	145	2645	2.645	2804	2.804	49	88.6	389_1	389
767	12.7833	5	144	2550	2.55	2703	2.703	46	83.3	389_1	389
768	12.8	5	143	2518	2.518	2654	2.654	47	83	389_1	389
769	12.8167	5	142	2271	2.271	2394	2.394	42	72.7	389_1	389
771	12.85	5	141	2168	2.168	2297	2.297	41	71.4	389_1	389
772	12.8667	5	140	2116	2.116	2283	2.283	44	76.5	389_1	389
773	12.8833	5	140	2007	2.007	2210	2.21	44	77.9	389_1	389
774	12.9	5	139	1877	1.877	2128	2.128	44	78.7	389_1	389
776	12.9333	5	139	1832	1.832	2162	2.162	48	88.7	389_1	389
777	12.95	5	138	1667	1.667	2023	2.023	47	85.6	389_1	389
779	12.9833	5	138	1668	1.668	2024	2.024	47	85.6	389_1	389
780	13	5	138	1551	1.551	1971	1.971	47	87.6	389_1	389
782	13.0333	5	138	1548	1.548	2027	2.027	43	86.3	389_1	389
783	13.05	5	138	1577	1.577	2036	2.036	43	83.5	389_1	389
785	13.0833	5	138	1526	1.526	1997	1.997	42	81.8	389_1	389
787	13.1167	5	137	1689	1.689	2119	2.119	38	77.9	389_1	389
789	13.15	5	136	1831	1.831	2194	2.194	36	75.2	389_1	389
791	13.1833	5	133	1940	1.94	2234	2.234	33	71.6	389_1	389
793	13.2167	5	130	1979	1.979	2187	2.187	33	67.4	389_1	389
795	13.25	5	127	1945	1.945	2139	2.139	33	67.6	389_1	389
797	13.2833	5	125	1906	1.906	2071	2.071	31	64.8	389_1	389
799	13.3167	5	122	1905	1.905	2070	2.07	31	64.8	389_1	389
801	13.35	5	121	1905	1.905	2070	2.07	31	64.8	389_1	389
802	13.3667	5	120	1805	1.805	1975	1.975	33	64.5	389_1	389
804	13.4	5	120	1688	1.688	1869	1.869	35	62.3	389_1	389
807	13.45	5	120	1340	1.34	1496	1.496	30	50.1	389_1	389
808	13.4667	5	120	1258	1.258	1400	1.4	33	46.5	389_1	389
810	13.5	5	120	1143	1.143	1246	1.246	31	40.1	389_1	389
812	13.5333	5	120	1388	1.388	1484	1.484	37	47.4	389_1	389
815	13.5833	5	120	1241	1.241	1316	1.316	30	42.6	389_1	389
817	13.6167	5	120	1232	1.232	1295	1.295	28	40.2	389_1	389
819	13.65	5	120	1298	1.298	1333	1.333	27	39.4	389_1	389
820	13.6667	5	120	1438	1.438	1484	1.484	33	43.1	389_1	389
821	13.6833	5	120	1507	1.507	1553	1.553	32	47.3	389_1	389
823	13.7167	5	120	1674	1.674	1748	1.748	37	56.9	389_1	389
824	13.7333	5	119	1693	1.693	1789	1.789	41	61.4	389_1	389
825	13.75	5	119	1833	1.833	1970	1.97	45	70.7	389_1	389
826	13.7667	5	118	1779	1.779	1986	1.986	49	78.5	389_1	389
828	13.8	5	117	1826	1.826	2050	2.05	50	82.1	389_1	389
829	13.8167	5	116	1664	1.664	1912	1.912	48	77.8	389_1	389
830	13.8333	5	116	1636	1.636	1909	1.909	46	76.8	389_1	389
832	13.8667	5	116	1527	1.527	1820	1.82	44	74	389_1	389
834	13.9	5	116	1427	1.427	1727	1.727	38	68.2	389_1	389
837	13.95	5	116	1322	1.322	1595	1.595	39	65.1	389_1	389
838	13.9667	5	116	1353	1.353	1626	1.626	40	65.9	389_1	389
840	14	5	116	1265	1.265	1508	1.508	34	55.4	389_1	389
843	14.05	5	116	1117	1.117	1311	1.311	31	46.5	389_1	389
845	14.0833	5	116	1164	1.164	1330	1.33	30	44.6	389_1	389
846	14.1	5	115	1239	1.239	1406	1.406	30	45.9	389_1	389
847	14.1167	5	115	1366	1.366	1504	1.504	33	49.3	389_1	389
848	14.1333	5	114	1512	1.512	1632	1.632	40	58.4	389_1	389
849	14.15	5	113	1531	1.531	1646	1.646	41	60.3	389_1	389
851	14.1833	5	112	1780	1.78	1960	1.96	44	75.7	389_1	389
852	14.2	5	110	1783	1.783	1963	1.963	44	75.7	389_1	389
854	14.2333	5	110	1648	1.648	1870	1.87	46	78.2	389_1	389
857	14.2833	5	110	1319	1.319	1500	1.5	35	59.3	389_1	389
859	14.3167	5	110	1311	1.311	1475	1.475	33	56	389_1	389
861	14.35	5	110	1284	1.284	1430	1.43	31	51.3	389_1	389
862	14.3667	5	110	1283	1.283	1429	1.429	31	51.3	389_1	389
863	14.3833	5	110	1311	1.311	1425	1.425	33	49.7	389_1	389
864	14.4	5	110	1306	1.306	1398	1.398	34	47.9	389_1	389
866	14.4333	5	108	1500	1.5	1612	1.612	42	59.4	389_1	389
867	14.45	5	106	1497	1.497	1616	1.616	41	60.7	389_1	389
868	14.4667	5	105	1396	1.396	1523	1.523	46	61.7	389_1	389
871	14.5167	5	104	1328	1.328	1450	1.45	54	63.9	389_1	389
872	14.5333	5	104	869	0.869	957	0.957	41	43.4	389_1	389
873	14.55	5	104	869	0.869	957	0.957	41	43.4	389_1	389
875	14.5833	5	105	970	0.97	1037	1.037	35	41.1	389_1	389
876	14.6	5	106	1005	1.005	1048	1.048	36	40.8	389_1	389
877	14.6167	5	106	1116	1.116	1143	1.143	36	42.5	389_1	389
878	14.6333	5	106	1201	1.201	1220	1.22	35	44	389_1	389
880	14.6667	5	106	1629	1.629	1643	1.643	43	59.4	389_1	389
881	14.6833	5	105	1731	1.731	1771	1.771	49	70.5	389_1	389
883	14.7167	5	104	1528	1.528	1592	1.592	44	64.6	389_1	389
884	14.7333	5	103	1528	1.528	1592	1.592	44	64.6	389_1	389
885	14.75	5	102	1441	1.441	1532	1.532	44	63	389_1	389
886	14.7667	5	102	1389	1.389	1489	1.489	43	60.8	389_1	389
888	14.8	5	102	1229	1.229	1335	1.335	39	54	389_1	389
889	14.8167	5	102	1248	1.248	1366	1.366	40	54.6	389_1	389
891	14.85	5	102	1188	1.188	1303	1.303	41	53.1	389_1	389
892	14.8667	5	102	1279	1.279	1396	1.396	45	56.1	389_1	389
893	14.8833	5	102	1357	1.357	1477	1.477	50	61.7	389_1	389
894	14.9	5	102	1301	1.301	1411	1.411	48	59.8	389_1	389
896	14.9333	5	103	1276	1.276	1382	1.382	46	57.3	389_1	389
899	14.9833	5	103	1276	1.276	1382	1.382	46	57.3	389_1	389
901	15.0167	5	103	1261	1.261	1346	1.346	44	54.9	389_1	389
902	15.0333	5	104	1312	1.312	1372	1.372	43	55.1	389_1	389
903	15.05	5	104	1311	1.311	1371	1.371	43	55.1	389_1	389
905	15.0833	5	103	1379	1.379	1442	1.442	39	57.1	389_1	389
907	15.1167	5	103	1387	1.387	1454	1.454	40	57.9	389_1	389
908	15.1333	5	102	1355	1.355	1416	1.416	41	57.6	389_1	389
909	15.15	5	102	1391	1.391	1452	1.452	42	59	389_1	389
911	15.1833	5	101	1320	1.32	1395	1.395	43	58.7	389_1	389
912	15.2	5	101	1236	1.236	1326	1.326	42	55.5	389_1	389
916	15.2667	5	101	1039	1.039	1114	1.114	41	46.6	389_1	389
917	15.2833	5	101	958	0.958	1013	1.013	40	40.4	389_1	389
919	15.3167	5	102	896	0.896	916	0.916	40	36.6	389_1	389
920	15.3333	5	102	914	0.914	932	0.932	42	37.3	389_1	389
921	15.35	5	102	1056	1.056	1036	1.036	40	39.8	389_1	389
922	15.3667	5	102	1159	1.159	1116	1.116	46	44.4	389_1	389
923	15.3833	5	102	1242	1.242	1181	1.181	48	47	389_1	389
925	15.4167	5	101	1373	1.373	1314	1.314	46	54.2	389_1	389
927	15.45	5	100	1376	1.376	1316	1.316	46	54.2	389_1	389
928	15.4667	5	99	1477	1.477	1434	1.434	48	57.8	389_1	389
929	15.4833	5	99	1256	1.256	1240	1.24	51	52.6	389_1	389
930	15.5	5	99	1214	1.214	1203	1.203	52	52	389_1	389
