# Supplementary material for: On the development of diagnostic support algorithms based on CPET biosignals data via machine learning and wavelets
Source: PeerJ journal article supplement (doi:10.7717/peerj-cs.2474), 2025-01-30
Supplement: raw_data.zip [file Subject_41.xlsx]

## Sheet: Folha1
time	time	Speed	HR	VO2	VO2	VCO2	VCO2	RR	VE	ID_test	ID
	min	km/h	/min	ml/min	L/min	ml/min	L/min	/min	L/min
0	0	4.9	71	323	0.323	280	0.28	22	10.5	755_1	755
3	0.05	4.9	74	371	0.371	330	0.33	22	12	755_1	755
6	0.1	4.9	76	450	0.45	412	0.412	22	14.3	755_1	755
9	0.15	4.9	78	440	0.44	403	0.403	23	14.4	755_1	755
11	0.183333	4.9	79	459	0.459	413	0.413	24	14.8	755_1	755
12	0.2	4.9	79	517	0.517	465	0.465	25	16.5	755_1	755
14	0.233333	4.9	79	583	0.583	513	0.513	26	17.9	755_1	755
18	0.3	4.9	80	488	0.488	422	0.422	22	15.1	755_1	755
19	0.316667	4.9	82	456	0.456	374	0.374	25	14	755_1	755
22	0.366667	4.9	84	491	0.491	363	0.363	27	13.3	755_1	755
24	0.4	4.9	85	564	0.564	419	0.419	26	14.8	755_1	755
26	0.433333	4.9	87	651	0.651	483	0.483	25	16.5	755_1	755
28	0.466667	4.9	88	640	0.64	479	0.479	25	16.6	755_1	755
30	0.5	4.9	89	688	0.688	515	0.515	24	17.3	755_1	755
32	0.533333	4.9	90	855	0.855	631	0.631	28	20.6	755_1	755
37	0.616667	4.9	90	855	0.855	631	0.631	28	20.6	755_1	755
38	0.633333	4.9	92	872	0.872	652	0.652	28	21.6	755_1	755
40	0.666667	4.9	93	916	0.916	675	0.675	28	22	755_1	755
45	0.75	4.9	93	962	0.962	694	0.694	30	22.4	755_1	755
48	0.8	4.9	94	954	0.954	681	0.681	31	22	755_1	755
49	0.816667	4.9	95	956	0.956	662	0.662	32	21.4	755_1	755
51	0.85	4.9	96	972	0.972	663	0.663	31	21.3	755_1	755
54	0.9	4.9	96	1055	1.055	750	0.75	24	22.9	755_1	755
56	0.933333	4.9	95	1040	1.04	752	0.752	22	23	755_1	755
58	0.966667	4.9	95	1075	1.075	782	0.782	22	23.7	755_1	755
60	1	4.9	96	1074	1.074	776	0.776	28	24.2	755_1	755
62	1.03333	4.9	96	1072	1.072	797	0.797	28	24.9	755_1	755
64	1.06667	4.9	96	1073	1.073	798	0.798	28	24.9	755_1	755
66	1.1	4.9	96	1068	1.068	812	0.812	27	25.1	755_1	755
68	1.13333	4.9	96	1039	1.039	807	0.807	27	25.1	755_1	755
71	1.18333	4.9	96	1031	1.031	814	0.814	28	25.2	755_1	755
73	1.21667	4.9	96	1031	1.031	813	0.813	28	25.2	755_1	755
75	1.25	4.9	96	993	0.993	789	0.789	29	24.5	755_1	755
77	1.28333	4.9	95	997	0.997	797	0.797	28	24.5	755_1	755
79	1.31667	4.9	96	997	0.997	797	0.797	28	24.5	755_1	755
81	1.35	4.9	96	980	0.98	787	0.787	29	24.1	755_1	755
83	1.38333	4.9	96	970	0.97	782	0.782	29	24.1	755_1	755
85	1.41667	4.9	96	972	0.972	787	0.787	29	24.3	755_1	755
87	1.45	4.9	96	964	0.964	785	0.785	29	24.1	755_1	755
91	1.51667	4.9	96	938	0.938	768	0.768	28	23.5	755_1	755
93	1.55	4.9	96	936	0.936	766	0.766	28	23.3	755_1	755
95	1.58333	4.9	96	970	0.97	790	0.79	30	24.2	755_1	755
97	1.61667	4.9	96	981	0.981	800	0.8	30	24.5	755_1	755
99	1.65	4.9	96	920	0.92	760	0.76	27	23.3	755_1	755
100	1.66667	4.9	97	877	0.877	725	0.725	27	22.5	755_1	755
103	1.71667	4.9	97	860	0.86	698	0.698	26	21.5	755_1	755
105	1.75	4.9	97	906	0.906	712	0.712	29	21.9	755_1	755
107	1.78333	4.9	100	909	0.909	712	0.712	28	21.5	755_1	755
110	1.83333	4.9	99	909	0.909	712	0.712	28	21.5	755_1	755
112	1.86667	4.9	98	925	0.925	734	0.734	27	22	755_1	755
114	1.9	4.9	95	969	0.969	770	0.77	26	22.7	755_1	755
116	1.93333	4.9	92	983	0.983	792	0.792	26	23.6	755_1	755
118	1.96667	4.9	90	984	0.984	793	0.793	26	23.6	755_1	755
120	2	4.9	88	962	0.962	786	0.786	27	23.8	755_1	755
122	2.03333	4.9	87	979	0.979	800	0.8	27	24.1	755_1	755
126	2.1	4.9	88	919	0.919	758	0.758	28	23.6	755_1	755
128	2.13333	4.9	88	903	0.903	738	0.738	29	22.9	755_1	755
130	2.16667	4.9	88	878	0.878	714	0.714	29	22	755_1	755
133	2.21667	4.9	88	866	0.866	702	0.702	28	21.4	755_1	755
135	2.25	4.9	88	849	0.849	687	0.687	27	20.6	755_1	755
138	2.3	4.9	89	850	0.85	685	0.685	25	20	755_1	755
140	2.33333	4.9	89	850	0.85	685	0.685	25	20	755_1	755
143	2.38333	4.9	89	894	0.894	712	0.712	26	20.7	755_1	755
145	2.41667	4.9	90	910	0.91	718	0.718	25	20.8	755_1	755
148	2.46667	4.9	91	922	0.922	731	0.731	25	21.2	755_1	755
150	2.5	4.9	91	914	0.914	727	0.727	25	21.3	755_1	755
152	2.53333	4.9	91	953	0.953	756	0.756	25	22.1	755_1	755
154	2.56667	4.9	91	975	0.975	774	0.774	26	22.6	755_1	755
156	2.6	4.9	92	969	0.969	779	0.779	26	22.8	755_1	755
159	2.65	4.9	93	963	0.963	791	0.791	26	23.4	755_1	755
161	2.68333	4.9	93	970	0.97	805	0.805	27	23.9	755_1	755
163	2.71667	4.9	93	965	0.965	813	0.813	27	24.3	755_1	755
165	2.75	4.9	93	965	0.965	813	0.813	27	24.3	755_1	755
167	2.78333	4.9	94	961	0.961	820	0.82	27	24.4	755_1	755
170	2.83333	4.9	95	964	0.964	827	0.827	27	24.6	755_1	755
173	2.88333	4.9	96	938	0.938	809	0.809	27	24.2	755_1	755
175	2.91667	4.9	96	950	0.95	817	0.817	28	24.2	755_1	755
177	2.95	4.9	97	941	0.941	810	0.81	27	23.9	755_1	755
179	2.98333	4.9	97	962	0.962	822	0.822	27	24	755_1	755
182	3.03333	4.9	96	998	0.998	852	0.852	27	24.5	755_1	755
184	3.06667	4.9	95	1008	1.008	864	0.864	27	25	755_1	755
186	3.1	4.9	94	993	0.993	859	0.859	27	24.8	755_1	755
188	3.13333	4.9	94	995	0.995	864	0.864	27	24.9	755_1	755
191	3.18333	4.9	93	982	0.982	865	0.865	26	25.1	755_1	755
193	3.21667	4.9	93	968	0.968	864	0.864	27	25.2	755_1	755
195	3.25	4.9	93	926	0.926	833	0.833	27	24.5	755_1	755
197	3.28333	4.9	93	931	0.931	837	0.837	27	24.4	755_1	755
200	3.33333	4.9	93	912	0.912	823	0.823	26	24.1	755_1	755
202	3.36667	4.9	93	938	0.938	840	0.84	27	24.4	755_1	755
204	3.4	4.9	94	917	0.917	819	0.819	27	24.1	755_1	755
206	3.43333	4.9	94	899	0.899	804	0.804	27	23.6	755_1	755
210	3.5	4.9	94	896	0.896	801	0.801	27	23.5	755_1	755
212	3.53333	4.9	95	921	0.921	809	0.809	26	23.6	755_1	755
215	3.58333	4.9	95	930	0.93	809	0.809	26	23.7	755_1	755
217	3.61667	4.9	95	947	0.947	826	0.826	26	24.2	755_1	755
219	3.65	4.9	95	960	0.96	836	0.836	26	24.3	755_1	755
221	3.68333	4.9	95	999	0.999	870	0.87	26	25.2	755_1	755
223	3.71667	4.9	94	1036	1.036	902	0.902	26	26.1	755_1	755
226	3.76667	4.9	94	1048	1.048	928	0.928	27	27.1	755_1	755
228	3.8	4.9	95	1049	1.049	929	0.929	27	27.1	755_1	755
230	3.83333	4.9	96	1005	1.005	897	0.897	27	26.3	755_1	755
232	3.86667	6.1	98	966	0.966	856	0.856	28	25.3	755_1	755
234	3.9	6.1	100	966	0.966	856	0.856	28	25.3	755_1	755
236	3.93333	6.1	103	1003	1.003	880	0.88	29	25.9	755_1	755
238	3.96667	6.1	106	1007	1.007	875	0.875	29	26.2	755_1	755
240	4	6.1	108	1037	1.037	900	0.9	30	27.1	755_1	755
242	4.03333	6.1	110	1106	1.106	962	0.962	31	29.2	755_1	755
244	4.06667	6.1	111	1167	1.167	1027	1.027	31	31.2	755_1	755
246	4.1	6.1	112	1167	1.167	1027	1.027	31	31.2	755_1	755
248	4.13333	6.1	114	1155	1.155	1030	1.03	30	31.4	755_1	755
250	4.16667	6.1	115	1151	1.151	1028	1.028	30	31.2	755_1	755
252	4.2	6.1	117	1156	1.156	1040	1.04	30	31.3	755_1	755
254	4.23333	6.1	117	1147	1.147	1022	1.022	29	30.7	755_1	755
256	4.26667	6.1	119	1147	1.147	1022	1.022	29	30.7	755_1	755
259	4.31667	6.1	120	1175	1.175	1035	1.035	30	31	755_1	755
261	4.35	6.1	121	1219	1.219	1099	1.099	26	33.4	755_1	755
262	4.36667	6.1	122	1241	1.241	1104	1.104	28	33.9	755_1	755
264	4.4	6.1	122	1287	1.287	1135	1.135	29	35.1	755_1	755
266	4.43333	6.1	123	1366	1.366	1188	1.188	29	36.8	755_1	755
268	4.46667	6.1	124	1365	1.365	1187	1.187	29	36.8	755_1	755
270	4.5	6.1	124	1396	1.396	1202	1.202	29	36.9	755_1	755
272	4.53333	6.1	125	1463	1.463	1224	1.224	35	37	755_1	755
274	4.56667	6.1	126	1476	1.476	1240	1.24	34	37.8	755_1	755
276	4.6	6.1	127	1503	1.503	1261	1.261	33	38.6	755_1	755
277	4.61667	6.1	127	1500	1.5	1257	1.257	33	38.5	755_1	755
279	4.65	6.1	128	1483	1.483	1243	1.243	32	37.6	755_1	755
282	4.7	6.1	128	1483	1.483	1243	1.243	32	37.6	755_1	755
284	4.73333	6.1	129	1531	1.531	1283	1.283	33	39.3	755_1	755
285	4.75	6.1	129	1533	1.533	1275	1.275	33	39	755_1	755
287	4.78333	6.1	129	1511	1.511	1261	1.261	33	37.7	755_1	755
289	4.81667	6.1	129	1521	1.521	1262	1.262	33	36.9	755_1	755
291	4.85	6.1	129	1598	1.598	1328	1.328	31	37.9	755_1	755
293	4.88333	7	129	1627	1.627	1351	1.351	31	39.4	755_1	755
295	4.91667	7	129	1698	1.698	1420	1.42	33	41.6	755_1	755
296	4.93333	7	129	1683	1.683	1405	1.405	33	41.4	755_1	755
298	4.96667	7	129	1649	1.649	1403	1.403	34	41.1	755_1	755
300	5	7	129	1690	1.69	1428	1.428	35	42	755_1	755
301	5.01667	7	129	1716	1.716	1439	1.439	34	41.8	755_1	755
303	5.05	7	130	1687	1.687	1427	1.427	35	41.8	755_1	755
305	5.08333	7	130	1710	1.71	1463	1.463	34	42.6	755_1	755
307	5.11667	7	130	1670	1.67	1437	1.437	34	41.5	755_1	755
309	5.15	7	131	1670	1.67	1437	1.437	34	41.5	755_1	755
310	5.16667	7	132	1740	1.74	1499	1.499	35	43.5	755_1	755
312	5.2	7	132	1720	1.72	1503	1.503	34	44.2	755_1	755
314	5.23333	7	133	1709	1.709	1527	1.527	34	45.2	755_1	755
316	5.26667	7	133	1687	1.687	1522	1.522	35	45	755_1	755
318	5.3	7	134	1707	1.707	1544	1.544	35	45.2	755_1	755
319	5.31667	7	134	1741	1.741	1568	1.568	36	45.5	755_1	755
321	5.35	7	135	1698	1.698	1529	1.529	33	43.8	755_1	755
323	5.38333	7	135	1694	1.694	1522	1.522	33	43.8	755_1	755
325	5.41667	7	141	1751	1.751	1561	1.561	34	44.3	755_1	755
327	5.45	7	142	1796	1.796	1611	1.611	33	46.5	755_1	755
329	5.48333	7	142	1805	1.805	1638	1.638	34	47.5	755_1	755
330	5.5	7	143	1805	1.805	1651	1.651	33	48	755_1	755
332	5.53333	7	143	1844	1.844	1694	1.694	33	49.8	755_1	755
334	5.56667	7	143	1847	1.847	1702	1.702	33	50.6	755_1	755
335	5.58333	7	164	1845	1.845	1733	1.733	33	51.2	755_1	755
338	5.63333	7	144	1811	1.811	1733	1.733	32	50.8	755_1	755
339	5.65	7	145	1809	1.809	1740	1.74	33	50.9	755_1	755
341	5.68333	7	146	1850	1.85	1762	1.762	34	51.4	755_1	755
343	5.71667	7	141	1843	1.843	1780	1.78	34	52.4	755_1	755
345	5.75	7	141	1796	1.796	1772	1.772	33	52.3	755_1	755
346	5.76667	7	146	1808	1.808	1795	1.795	33	53.8	755_1	755
348	5.8	7	142	1854	1.854	1835	1.835	34	55.2	755_1	755
349	5.81667	7	142	1878	1.878	1853	1.853	37	56.4	755_1	755
351	5.85	7	142	1891	1.891	1872	1.872	37	56.9	755_1	755
352	5.86667	7	147	1886	1.886	1854	1.854	39	56.4	755_1	755
354	5.9	8	147	1915	1.915	1881	1.881	38	57.7	755_1	755
355	5.91667	8	151	1916	1.916	1881	1.881	38	57.7	755_1	755
357	5.95	8	148	1878	1.878	1840	1.84	39	56.1	755_1	755
359	5.98333	8	141	1859	1.859	1830	1.83	40	54.9	755_1	755
361	6.01667	8	148	1861	1.861	1846	1.846	37	54.8	755_1	755
363	6.05	8	153	1871	1.871	1851	1.851	37	54.3	755_1	755
364	6.06667	8	135	1886	1.886	1877	1.877	35	55.2	755_1	755
366	6.1	8	135	1876	1.876	1865	1.865	36	54.3	755_1	755
368	6.13333	8	132	1905	1.905	1890	1.89	36	54.8	755_1	755
369	6.15	8	136	1930	1.93	1885	1.885	35	55	755_1	755
371	6.18333	8	136	1931	1.931	1886	1.886	35	55	755_1	755
373	6.21667	8	146	1929	1.929	1881	1.881	35	55.1	755_1	755
375	6.25	8	141	1925	1.925	1884	1.884	35	55.9	755_1	755
376	6.26667	8	156	1942	1.942	1894	1.894	35	56.2	755_1	755
379	6.31667	8	156	1934	1.934	1897	1.897	33	56	755_1	755
380	6.33333	8	156	1965	1.965	1922	1.922	33	56.8	755_1	755
382	6.36667	8	143	1991	1.991	1956	1.956	34	57.3	755_1	755
383	6.38333	8	143	2036	2.036	1993	1.993	37	59	755_1	755
385	6.41667	8	143	2088	2.088	2044	2.044	39	59.9	755_1	755
387	6.45	8	143	2025	2.025	2005	2.005	36	58.4	755_1	755
389	6.48333	8	147	2064	2.064	2035	2.035	36	58.6	755_1	755
391	6.51667	8	145	2151	2.151	2100	2.1	40	61	755_1	755
392	6.53333	8	145	2156	2.156	2112	2.112	39	61.9	755_1	755
394	6.56667	8	148	2150	2.15	2125	2.125	38	61.9	755_1	755
395	6.58333	8	149	2145	2.145	2133	2.133	38	62.2	755_1	755
397	6.61667	8	149	2179	2.179	2154	2.154	39	63.8	755_1	755
398	6.63333	8	145	2179	2.179	2154	2.154	39	63.8	755_1	755
400	6.66667	8	145	2151	2.151	2150	2.15	38	63.7	755_1	755
402	6.7	8	146	2098	2.098	2125	2.125	37	62.7	755_1	755
403	6.71667	8	146	2112	2.112	2139	2.139	37	62.9	755_1	755
405	6.75	8	146	2125	2.125	2134	2.134	38	63.4	755_1	755
406	6.76667	8	146	2139	2.139	2149	2.149	38	63.6	755_1	755
408	6.8	8	146	2094	2.094	2137	2.137	37	62	755_1	755
410	6.83333	8	146	2075	2.075	2124	2.124	36	62.1	755_1	755
412	6.86667	8	147	2077	2.077	2122	2.122	37	61.8	755_1	755
413	6.88333	8	143	2144	2.144	2158	2.158	39	62.1	755_1	755
415	6.91667	9	128	2088	2.088	2119	2.119	39	61.2	755_1	755
416	6.93333	9	140	2088	2.088	2119	2.119	39	61.2	755_1	755
417	6.95	9	148	2093	2.093	2131	2.131	39	61.2	755_1	755
419	6.98333	9	141	2135	2.135	2154	2.154	41	62.4	755_1	755
420	7	9	138	2175	2.175	2205	2.205	41	63.8	755_1	755
422	7.03333	9	119	2140	2.14	2196	2.196	42	64.4	755_1	755
423	7.05	9	134	2137	2.137	2210	2.21	41	64.9	755_1	755
424	7.06667	9	141	2184	2.184	2240	2.24	42	65.4	755_1	755
426	7.1	9	138	2183	2.183	2240	2.24	42	65.4	755_1	755
427	7.11667	9	131	2210	2.21	2266	2.266	42	66.5	755_1	755
429	7.15	9	138	2190	2.19	2259	2.259	42	66.3	755_1	755
430	7.16667	9	140	2181	2.181	2238	2.238	42	65.4	755_1	755
432	7.2	9	147	2189	2.189	2239	2.239	41	65.2	755_1	755
434	7.23333	9	132	2181	2.181	2225	2.225	41	64.5	755_1	755
435	7.25	9	132	2214	2.214	2238	2.238	41	64.3	755_1	755
437	7.28333	9	132	2225	2.225	2232	2.232	40	63.5	755_1	755
438	7.3	9	147	2196	2.196	2231	2.231	39	63.7	755_1	755
440	7.33333	9	147	2237	2.237	2248	2.248	39	63.8	755_1	755
441	7.35	9	147	2270	2.27	2282	2.282	39	65	755_1	755
443	7.38333	9	148	2282	2.282	2310	2.31	39	66.3	755_1	755
444	7.4	9	148	2280	2.28	2308	2.308	40	66.6	755_1	755
446	7.43333	9	148	2249	2.249	2305	2.305	38	66.8	755_1	755
448	7.46667	9	148	2200	2.2	2287	2.287	38	66.7	755_1	755
449	7.48333	9	148	2207	2.207	2294	2.294	40	67.1	755_1	755
450	7.5	9	148	2190	2.19	2295	2.295	40	67	755_1	755
452	7.53333	9	145	2177	2.177	2285	2.285	40	66.5	755_1	755
453	7.55	9	145	2174	2.174	2275	2.275	40	65.8	755_1	755
455	7.58333	9	140	2189	2.189	2286	2.286	40	65.9	755_1	755
456	7.6	9	140	2229	2.229	2310	2.31	43	66.6	755_1	755
458	7.63333	9	140	2229	2.229	2310	2.31	43	66.6	755_1	755
459	7.65	9	140	2224	2.224	2296	2.296	41	66.6	755_1	755
461	7.68333	9	140	2223	2.223	2296	2.296	41	66.6	755_1	755
462	7.7	9	144	2240	2.24	2313	2.313	41	67	755_1	755
464	7.73333	9	140	2253	2.253	2324	2.324	40	67.4	755_1	755
466	7.76667	9	144	2214	2.214	2293	2.293	40	66.3	755_1	755
467	7.78333	9	138	2228	2.228	2298	2.298	40	66.2	755_1	755
468	7.8	9	138	2264	2.264	2326	2.326	41	67.6	755_1	755
470	7.83333	9	138	2232	2.232	2319	2.319	42	67.5	755_1	755
471	7.85	9	138	2218	2.218	2331	2.331	42	67.9	755_1	755
473	7.88333	9	136	2176	2.176	2305	2.305	41	67	755_1	755
474	7.9	9	143	2176	2.176	2304	2.304	41	67	755_1	755
476	7.93333	10.1	144	2223	2.223	2344	2.344	44	68.6	755_1	755
477	7.95	10.1	144	2189	2.189	2326	2.326	43	68.4	755_1	755
478	7.96667	10.1	143	2183	2.183	2332	2.332	44	68.8	755_1	755
480	8	10.1	143	2202	2.202	2341	2.341	44	68.5	755_1	755
481	8.01667	10.1	143	2209	2.209	2330	2.33	44	68.3	755_1	755
483	8.05	10.1	146	2229	2.229	2356	2.356	44	69.5	755_1	755
484	8.06667	10.1	142	2203	2.203	2333	2.333	42	69.3	755_1	755
486	8.1	10.1	142	2184	2.184	2325	2.325	41	68.6	755_1	755
487	8.11667	10.1	147	2191	2.191	2349	2.349	42	69.5	755_1	755
488	8.13333	10.1	149	2191	2.191	2352	2.352	42	69.7	755_1	755
490	8.16667	10.1	153	2211	2.211	2364	2.364	44	70.1	755_1	755
491	8.18333	10.1	153	2198	2.198	2344	2.344	44	69.7	755_1	755
493	8.21667	10.1	153	2206	2.206	2328	2.328	42	68.9	755_1	755
494	8.23333	10.1	153	2200	2.2	2333	2.333	41	68.4	755_1	755
497	8.28333	10.1	153	2197	2.197	2323	2.323	41	68.1	755_1	755
498	8.3	10.1	153	2204	2.204	2312	2.312	41	67.1	755_1	755
499	8.31667	10.1	153	2212	2.212	2318	2.318	41	67	755_1	755
501	8.35	10.1	153	2238	2.238	2329	2.329	41	66.7	755_1	755
502	8.36667	10.1	152	2269	2.269	2356	2.356	41	67	755_1	755
504	8.4	10.1	152	2290	2.29	2373	2.373	42	67.2	755_1	755
505	8.41667	10.1	153	2348	2.348	2421	2.421	43	68	755_1	755
506	8.43333	10.1	158	2349	2.349	2440	2.44	42	69.1	755_1	755
508	8.46667	10.1	163	2349	2.349	2440	2.44	42	69.1	755_1	755
510	8.5	10.1	163	2326	2.326	2433	2.433	42	69	755_1	755
511	8.51667	10.1	165	2281	2.281	2414	2.414	40	68.7	755_1	755
513	8.55	10.1	165	2274	2.274	2403	2.403	41	68.9	755_1	755
514	8.56667	10.1	165	2291	2.291	2433	2.433	42	69.9	755_1	755
515	8.58333	10.1	160	2241	2.241	2408	2.408	42	69.3	755_1	755
516	8.6	10.1	155	2232	2.232	2400	2.4	43	69.1	755_1	755
518	8.63333	10.1	154	2238	2.238	2426	2.426	42	69.7	755_1	755
519	8.65	10.1	154	2281	2.281	2469	2.469	47	71.8	755_1	755
521	8.68333	10.1	154	2282	2.282	2470	2.47	47	71.8	755_1	755
522	8.7	10.1	154	2278	2.278	2474	2.474	47	72.2	755_1	755
524	8.73333	10.1	154	2323	2.323	2512	2.512	46	72.8	755_1	755
525	8.75	10.1	154	2398	2.398	2584	2.584	46	74.3	755_1	755
526	8.76667	10.1	154	2429	2.429	2623	2.623	46	75.1	755_1	755
528	8.8	10.1	154	2446	2.446	2630	2.63	46	75.3	755_1	755
529	8.81667	10.1	153	2467	2.467	2648	2.648	46	74.9	755_1	755
530	8.83333	10.1	150	2487	2.487	2657	2.657	47	75.7	755_1	755
532	8.86667	10.1	149	2451	2.451	2622	2.622	45	74.2	755_1	755
533	8.88333	10.1	149	2414	2.414	2588	2.588	43	73.5	755_1	755
534	8.9	10.1	149	2401	2.401	2563	2.563	43	72.9	755_1	755
535	8.91667	11.1	149	2426	2.426	2585	2.585	45	73.2	755_1	755
537	8.95	11.1	149	2424	2.424	2574	2.574	45	73	755_1	755
538	8.96667	11.1	149	2387	2.387	2535	2.535	43	72.1	755_1	755
540	9	11.1	153	2364	2.364	2519	2.519	43	71.2	755_1	755
541	9.01667	11.1	153	2344	2.344	2512	2.512	43	71.4	755_1	755
542	9.03333	11.1	153	2337	2.337	2522	2.522	43	71.9	755_1	755
544	9.06667	11.1	154	2317	2.317	2515	2.515	43	71.5	755_1	755
545	9.08333	11.1	154	2294	2.294	2495	2.495	42	70.9	755_1	755
554	9.23333	11.1	155	2276	2.276	2496	2.496	42	71.2	755_1	755
555	9.25	11.1	157	2272	2.272	2510	2.51	42	71.8	755_1	755
556	9.26667	11.1	158	2262	2.262	2505	2.505	42	72	755_1	755
558	9.3	11.1	158	2249	2.249	2487	2.487	43	71.5	755_1	755
559	9.31667	11.1	158	2252	2.252	2495	2.495	43	71.7	755_1	755
561	9.35	11.1	158	2259	2.259	2499	2.499	43	71.4	755_1	755
562	9.36667	11.1	156	2263	2.263	2506	2.506	43	71.8	755_1	755
563	9.38333	11.1	157	2289	2.289	2525	2.525	43	72.4	755_1	755
565	9.41667	11.1	156	2279	2.279	2514	2.514	43	72	755_1	755
566	9.43333	11.1	156	2287	2.287	2529	2.529	43	72.5	755_1	755
567	9.45	11.1	156	2315	2.315	2553	2.553	43	73	755_1	755
569	9.48333	11.1	156	2312	2.312	2556	2.556	43	73.1	755_1	755
570	9.5	11.1	156	2344	2.344	2591	2.591	46	74.6	755_1	755
571	9.51667	11.1	157	2357	2.357	2626	2.626	46	75.4	755_1	755
572	9.53333	11.1	157	2337	2.337	2626	2.626	46	75.1	755_1	755
574	9.56667	11.1	157	2356	2.356	2634	2.634	46	75.1	755_1	755
575	9.58333	11.1	157	2377	2.377	2651	2.651	46	74.8	755_1	755
577	9.61667	11.1	158	2349	2.349	2629	2.629	44	73.5	755_1	755
578	9.63333	11.1	161	2368	2.368	2647	2.647	46	74.2	755_1	755
579	9.65	11.1	161	2354	2.354	2625	2.625	43	72.8	755_1	755
581	9.68333	11.1	161	2378	2.378	2640	2.64	43	72.7	755_1	755
582	9.7	11.1	161	2433	2.433	2688	2.688	44	73.8	755_1	755
583	9.71667	11.1	171	2471	2.471	2741	2.741	46	76.2	755_1	755
584	9.73333	11.1	175	2461	2.461	2750	2.75	46	76.8	755_1	755
586	9.76667	11.1	171	2465	2.465	2774	2.774	46	77.5	755_1	755
587	9.78333	11.1	160	2432	2.432	2757	2.757	46	76.8	755_1	755
588	9.8	11.1	161	2463	2.463	2775	2.775	46	76.8	755_1	755
589	9.81667	11.1	166	2505	2.505	2821	2.821	48	78.2	755_1	755
590	9.83333	11.1	166	2504	2.504	2821	2.821	48	78.2	755_1	755
591	9.85	11.1	164	2514	2.514	2821	2.821	48	78	755_1	755
592	9.86667	11.1	159	2561	2.561	2867	2.867	52	80	755_1	755
594	9.9	11.1	159	2561	2.561	2868	2.868	52	80	755_1	755
595	9.91667	12	159	2626	2.626	2920	2.92	55	81.6	755_1	755
596	9.93333	12	159	2654	2.654	2944	2.944	59	82.6	755_1	755
597	9.95	12	156	2625	2.625	2907	2.907	59	82	755_1	755
598	9.96667	12	157	2570	2.57	2846	2.846	56	79.4	755_1	755
600	10	12	157	2527	2.527	2796	2.796	52	76.8	755_1	755
601	10.0167	12	157	2466	2.466	2730	2.73	49	75.1	755_1	755
603	10.05	12	157	2475	2.475	2731	2.731	49	75.2	755_1	755
604	10.0667	12	158	2458	2.458	2707	2.707	47	74.3	755_1	755
605	10.0833	12	158	2430	2.43	2681	2.681	44	73.3	755_1	755
606	10.1	12	157	2430	2.43	2680	2.68	44	73.3	755_1	755
608	10.1333	12	157	2409	2.409	2668	2.668	44	73.6	755_1	755
609	10.15	12	164	2419	2.419	2678	2.678	47	74.9	755_1	755
610	10.1667	12	164	2402	2.402	2664	2.664	47	74.8	755_1	755
611	10.1833	12	156	2395	2.395	2683	2.683	49	76.3	755_1	755
612	10.2	12	156	2371	2.371	2683	2.683	53	77.5	755_1	755
613	10.2167	12	156	2380	2.38	2730	2.73	56	80.4	755_1	755
614	10.2333	12	150	2345	2.345	2703	2.703	56	80.7	755_1	755
615	10.25	12	151	2306	2.306	2673	2.673	56	79.8	755_1	755
616	10.2667	12	148	2307	2.307	2673	2.673	56	79.8	755_1	755
617	10.2833	12	154	2341	2.341	2726	2.726	60	82.4	755_1	755
619	10.3167	12	154	2268	2.268	2672	2.672	56	80.7	755_1	755
620	10.3333	12	151	2276	2.276	2692	2.692	56	81.4	755_1	755
621	10.35	12	151	2262	2.262	2675	2.675	56	80.7	755_1	755
622	10.3667	12	155	2285	2.285	2715	2.715	56	80.9	755_1	755
623	10.3833	12	159	2343	2.343	2777	2.777	60	83.3	755_1	755
624	10.4	12	162	2274	2.274	2717	2.717	56	81	755_1	755
625	10.4167	12	158	2248	2.248	2695	2.695	53	79.4	755_1	755
626	10.4333	12	158	2335	2.335	2781	2.781	56	81.8	755_1	755
627	10.45	12	162	2365	2.365	2807	2.807	56	82	755_1	755
629	10.4833	12	167	2340	2.34	2771	2.771	54	80	755_1	755
630	10.5	12	158	2339	2.339	2770	2.77	54	80	755_1	755
631	10.5167	12	158	2314	2.314	2727	2.727	50	78.1	755_1	755
632	10.5333	12	159	2384	2.384	2803	2.803	53	80.3	755_1	755
633	10.55	12	165	2472	2.472	2896	2.896	56	82.8	755_1	755
634	10.5667	12	165	2450	2.45	2870	2.87	56	82.5	755_1	755
635	10.5833	12	165	2464	2.464	2902	2.902	56	83.2	755_1	755
636	10.6	12	160	2529	2.529	2997	2.997	60	85.9	755_1	755
637	10.6167	12	160	2469	2.469	2925	2.925	61	84.2	755_1	755
638	10.6333	12	160	2476	2.476	2936	2.936	60	83.9	755_1	755
639	10.65	12	160	2424	2.424	2884	2.884	60	82.7	755_1	755
641	10.6833	12	159	2409	2.409	2860	2.86	55	79.1	755_1	755
643	10.7167	12	159	2298	2.298	2739	2.739	46	73.2	755_1	755
644	10.7333	12	158	2282	2.282	2730	2.73	44	72.7	755_1	755
645	10.75	12	157	2214	2.214	2663	2.663	43	71	755_1	755
647	10.7833	4.9	156	2176	2.176	2650	2.65	40	70.7	755_1	755
648	10.8	4.9	156	2144	2.144	2627	2.627	39	69.5	755_1	755
649	10.8167	4.9	156	2207	2.207	2715	2.715	43	73.6	755_1	755
651	10.85	4.9	155	2165	2.165	2689	2.689	45	73.7	755_1	755
652	10.8667	4.9	155	2214	2.214	2730	2.73	45	72.7	755_1	755
654	10.9	4.9	155	2228	2.228	2715	2.715	44	70.2	755_1	755
655	10.9167	4.9	153	2284	2.284	2785	2.785	44	71.9	755_1	755
656	10.9333	4.9	152	2345	2.345	2848	2.848	43	71.2	755_1	755
658	10.9667	4.9	151	2373	2.373	2899	2.899	43	72.2	755_1	755
659	10.9833	4.9	150	2373	2.373	2899	2.899	44	71.7	755_1	755
660	11	4.9	149	2405	2.405	2951	2.951	44	72.5	755_1	755
661	11.0167	4.9	148	2398	2.398	3001	3.001	45	73.5	755_1	755
663	11.05	4.9	147	2398	2.398	3001	3.001	45	73.5	755_1	755
664	11.0667	4.9	146	2345	2.345	2958	2.958	44	72.7	755_1	755
666	11.1	4.9	145	2290	2.29	2905	2.905	45	71.2	755_1	755
668	11.1333	4.9	144	2203	2.203	2808	2.808	43	68.6	755_1	755
670	11.1667	4.9	143	2211	2.211	2829	2.829	43	69.1	755_1	755
671	11.1833	4.9	142	2243	2.243	2832	2.832	42	68.7	755_1	755
672	11.2	4.9	142	2261	2.261	2830	2.83	44	69.9	755_1	755
673	11.2167	4.9	141	2268	2.268	2812	2.812	44	69.9	755_1	755
674	11.2333	4.9	140	2279	2.279	2814	2.814	47	72.4	755_1	755
675	11.25	4.9	140	2298	2.298	2832	2.832	50	74.2	755_1	755
677	11.2833	4.9	139	2359	2.359	2919	2.919	51	76.5	755_1	755
678	11.3	4.9	138	2257	2.257	2839	2.839	51	75.9	755_1	755
679	11.3167	4.9	137	2212	2.212	2816	2.816	50	75	755_1	755
680	11.3333	4.9	137	2188	2.188	2767	2.767	52	75.1	755_1	755
682	11.3667	4.9	136	2137	2.137	2710	2.71	51	73.4	755_1	755
683	11.3833	4.9	136	2096	2.096	2672	2.672	47	70.6	755_1	755
684	11.4	4.9	135	2148	2.148	2750	2.75	48	72.7	755_1	755
685	11.4167	4.9	134	2110	2.11	2705	2.705	49	72.2	755_1	755
688	11.4667	4.9	132	2037	2.037	2617	2.617	48	69.8	755_1	755
689	11.4833	4.9	132	2078	2.078	2654	2.654	46	69.2	755_1	755
690	11.5	4.9	131	2091	2.091	2674	2.674	45	68.6	755_1	755
692	11.5333	4.9	130	2138	2.138	2742	2.742	46	70.7	755_1	755
693	11.55	4.9	131	2137	2.137	2765	2.765	47	72.5	755_1	755
694	11.5667	4.9	131	2029	2.029	2669	2.669	49	72.6	755_1	755
695	11.5833	4.9	131	1985	1.985	2638	2.638	47	72	755_1	755
697	11.6167	4.9	131	1985	1.985	2638	2.638	47	72	755_1	755
698	11.6333	4.9	131	1897	1.897	2564	2.564	47	71	755_1	755
700	11.6667	4.9	131	1834	1.834	2518	2.518	46	70.5	755_1	755
701	11.6833	4.9	131	1807	1.807	2496	2.496	46	70.1	755_1	755
702	11.7	4.9	131	1763	1.763	2463	2.463	44	69.2	755_1	755
704	11.7333	4.9	130	1728	1.728	2442	2.442	43	68.6	755_1	755
705	11.75	4.9	130	1716	1.716	2427	2.427	43	68.6	755_1	755
707	11.7833	4.9	130	1705	1.705	2423	2.423	42	68.1	755_1	755
708	11.8	4.9	129	1688	1.688	2404	2.404	42	67.6	755_1	755
710	11.8333	4.9	128	1649	1.649	2364	2.364	41	66.2	755_1	755
711	11.85	4.9	127	1625	1.625	2338	2.338	41	65	755_1	755
712	11.8667	4.9	126	1610	1.61	2323	2.323	41	64.7	755_1	755
714	11.9	4.9	125	1567	1.567	2258	2.258	42	63.2	755_1	755
716	11.9333	4.9	124	1514	1.514	2194	2.194	41	60.5	755_1	755
718	11.9667	4.9	123	1459	1.459	2124	2.124	39	57.6	755_1	755
720	12	4.9	122	1494	1.494	2135	2.135	38	56.6	755_1	755
721	12.0167	4.9	120	1524	1.524	2152	2.152	39	56.3	755_1	755
723	12.05	4.9	120	1476	1.476	2058	2.058	38	53.6	755_1	755
725	12.0833	4.9	119	1428	1.428	1985	1.985	36	51.6	755_1	755
727	12.1167	4.9	118	1358	1.358	1861	1.861	32	46.7	755_1	755
729	12.15	4.9	118	1392	1.392	1881	1.881	33	47.4	755_1	755
730	12.1667	4.9	118	1492	1.492	1990	1.99	39	52.6	755_1	755
731	12.1833	4.9	118	1493	1.493	2000	2	41	55.2	755_1	755
733	12.2167	4.9	118	1458	1.458	1981	1.981	41	56.2	755_1	755
734	12.2333	4.9	118	1501	1.501	2071	2.071	43	60	755_1	755
735	12.25	4.9	118	1494	1.494	2104	2.104	45	62.9	755_1	755
737	12.2833	4.9	118	1467	1.467	2138	2.138	45	65.1	755_1	755
738	12.3	4.9	118	1394	1.394	2062	2.062	45	63.4	755_1	755
740	12.3333	4.9	117	1394	1.394	2063	2.063	45	63.4	755_1	755
741	12.35	4.9	117	1380	1.38	2045	2.045	42	62.2	755_1	755
743	12.3833	4.9	117	1374	1.374	2038	2.038	42	62.2	755_1	755
744	12.4	4.9	114	1358	1.358	2017	2.017	42	61.1	755_1	755
746	12.4333	4.9	113	1348	1.348	2004	2.004	41	59.8	755_1	755
749	12.4833	4.9	112	1285	1.285	1908	1.908	40	56.4	755_1	755
753	12.55	4.9	110	1061	1.061	1531	1.531	29	42.8	755_1	755
754	12.5667	4.9	108	1072	1.072	1546	1.546	30	44.1	755_1	755
755	12.5833	4.9	107	1134	1.134	1563	1.563	32	44	755_1	755
757	12.6167	4.9	108	1162	1.162	1538	1.538	32	42.4	755_1	755
758	12.6333	4.9	109	1217	1.217	1565	1.565	32	43.3	755_1	755
760	12.6667	4.9	109	1260	1.26	1617	1.617	31	45.1	755_1	755
762	12.7	4.9	109	1599	1.599	2072	2.072	42	60.7	755_1	755
763	12.7167	4.9	110	1653	1.653	2121	2.121	45	62.4	755_1	755
764	12.7333	4.9	110	1502	1.502	1984	1.984	43	59.4	755_1	755
766	12.7667	4.9	111	1398	1.398	1892	1.892	39	56.4	755_1	755
767	12.7833	4.9	111	1361	1.361	1891	1.891	38	57.2	755_1	755
769	12.8167	4.9	112	1339	1.339	1855	1.855	38	56.6	755_1	755
771	12.85	4.9	112	1337	1.337	1844	1.844	40	56.8	755_1	755
773	12.8833	4.9	111	1268	1.268	1759	1.759	39	53.5	755_1	755
775	12.9167	4.9	111	1271	1.271	1755	1.755	38	53.4	755_1	755
776	12.9333	4.9	111	1291	1.291	1766	1.766	39	53.8	755_1	755
778	12.9667	4.9	109	1297	1.297	1740	1.74	38	52.6	755_1	755
779	12.9833	4.9	108	1329	1.329	1751	1.751	39	52	755_1	755
780	13	4.9	107	1310	1.31	1705	1.705	41	51.4	755_1	755
784	13.0667	4.9	106	1273	1.273	1625	1.625	36	46.5	755_1	755
785	13.0833	4.9	106	1364	1.364	1726	1.726	42	51.8	755_1	755
787	13.1167	4.9	106	1300	1.3	1625	1.625	39	48	755_1	755
789	13.15	4.9	106	1250	1.25	1543	1.543	35	44.2	755_1	755
791	13.1833	4.9	106	1265	1.265	1543	1.543	34	42.9	755_1	755
793	13.2167	4.9	105	1282	1.282	1534	1.534	32	41.7	755_1	755
795	13.25	4.9	105	1280	1.28	1533	1.533	32	41.7	755_1	755
796	13.2667	4.9	105	1314	1.314	1571	1.571	35	44.2	755_1	755
799	13.3167	4.9	105	1283	1.283	1534	1.534	33	42.6	755_1	755
800	13.3333	4.9	104	1290	1.29	1512	1.512	37	42.6	755_1	755
801	13.35	4.9	104	1356	1.356	1555	1.555	38	44	755_1	755
803	13.3833	4.9	104	1399	1.399	1595	1.595	39	45.9	755_1	755
805	13.4167	4.9	104	1404	1.404	1611	1.611	39	46.6	755_1	755
807	13.45	4.9	104	1338	1.338	1555	1.555	38	45.2	755_1	755
809	13.4833	4.9	104	1313	1.313	1527	1.527	36	43.7	755_1	755
811	13.5167	4.9	104	1300	1.3	1554	1.554	33	44.2	755_1	755
813	13.55	4.9	103	1301	1.301	1554	1.554	33	44.2	755_1	755
