# Supplementary material for: On the development of diagnostic support algorithms based on CPET biosignals data via machine learning and wavelets
Source: PeerJ journal article supplement (doi:10.7717/peerj-cs.2474), 2025-01-30
Supplement: raw_data.zip [file Subject_42.xlsx]

## Sheet: Folha1
time	time	Speed	HR	VO2	VO2	VCO2	VCO2	RR	VE	ID_test	ID
	min	km/h	/min	ml/min	L/min	ml/min	L/min	/min	L/min
0	0	4.9	74	390	0.39	433	0.433	8	15.3	856_3	856
7	0.116667	4.9	75	445	0.445	497	0.497	8	16.9	856_3	856
11	0.183333	4.9	76	449	0.449	494	0.494	9	16.7	856_3	856
18	0.3	4.9	79	544	0.544	589	0.589	10	18.9	856_3	856
22	0.366667	4.9	82	606	0.606	656	0.656	11	20.9	856_3	856
27	0.45	4.9	85	684	0.684	737	0.737	12	23.7	856_3	856
30	0.5	4.9	87	697	0.697	755	0.755	12	24.2	856_3	856
33	0.55	4.9	87	710	0.71	760	0.76	13	24.5	856_3	856
40	0.666667	4.9	87	731	0.731	804	0.804	12	25.6	856_3	856
42	0.7	4.9	87	732	0.732	804	0.804	12	25.6	856_3	856
51	0.85	4.9	87	694	0.694	750	0.75	11	23.5	856_3	856
55	0.916667	4.9	86	668	0.668	705	0.705	11	22.2	856_3	856
59	0.983333	4.9	86	641	0.641	600	0.6	13	18.5	856_3	856
62	1.03333	4.9	86	700	0.7	622	0.622	13	19	856_3	856
65	1.08333	4.9	85	769	0.769	742	0.742	11	22.7	856_3	856
67	1.11667	4.9	85	821	0.821	705	0.705	13	21	856_3	856
72	1.2	4.9	84	965	0.965	833	0.833	15	24.7	856_3	856
74	1.23333	4.9	84	1057	1.057	837	0.837	22	24.8	856_3	856
77	1.28333	4.9	83	1065	1.065	854	0.854	20	24.6	856_3	856
80	1.33333	4.9	82	1088	1.088	914	0.914	21	26.6	856_3	856
84	1.4	4.9	81	1092	1.092	964	0.964	19	27.5	856_3	856
88	1.46667	4.9	81	985	0.985	903	0.903	18	25.6	856_3	856
94	1.56667	4.9	80	977	0.977	942	0.942	15	26.7	856_3	856
96	1.6	4.9	80	874	0.874	822	0.822	18	23.6	856_3	856
99	1.65	4.9	79	884	0.884	833	0.833	18	23.5	856_3	856
105	1.75	4.9	79	983	0.983	948	0.948	15	26.7	856_3	856
109	1.81667	4.9	79	953	0.953	925	0.925	15	26.3	856_3	856
114	1.9	4.9	79	861	0.861	830	0.83	15	23.6	856_3	856
115	1.91667	4.9	78	808	0.808	781	0.781	15	22.5	856_3	856
120	2	4.9	78	806	0.806	792	0.792	15	23.5	856_3	856
122	2.03333	4.9	77	792	0.792	775	0.775	15	23	856_3	856
124	2.06667	4.9	76	816	0.816	801	0.801	16	24.5	856_3	856
125	2.08333	4.9	75	726	0.726	674	0.674	22	20.8	856_3	856
130	2.16667	4.9	75	937	0.937	949	0.949	20	29.6	856_3	856
133	2.21667	4.9	75	943	0.943	982	0.982	23	31.7	856_3	856
137	2.28333	4.9	75	972	0.972	1017	1.017	21	31.8	856_3	856
139	2.31667	4.9	76	864	0.864	860	0.86	24	26.2	856_3	856
142	2.36667	4.9	76	965	0.965	968	0.968	26	29.8	856_3	856
147	2.45	4.9	76	869	0.869	878	0.878	20	25.7	856_3	856
150	2.5	4.9	76	798	0.798	804	0.804	18	23.3	856_3	856
152	2.53333	4.9	76	761	0.761	756	0.756	19	21.9	856_3	856
158	2.63333	4.9	75	760	0.76	756	0.756	19	21.9	856_3	856
162	2.7	4.9	75	780	0.78	783	0.783	20	23.2	856_3	856
164	2.73333	4.9	75	740	0.74	729	0.729	21	22.1	856_3	856
167	2.78333	4.9	75	748	0.748	720	0.72	21	21.3	856_3	856
169	2.81667	4.9	75	773	0.773	727	0.727	26	22.8	856_3	856
175	2.91667	4.9	75	766	0.766	723	0.723	20	21.3	856_3	856
178	2.96667	4.9	75	737	0.737	688	0.688	15	18.9	856_3	856
181	3.01667	4.9	75	874	0.874	814	0.814	20	22.9	856_3	856
183	3.05	4.9	76	875	0.875	814	0.814	20	22.9	856_3	856
186	3.1	4.9	76	863	0.863	806	0.806	19	22.6	856_3	856
190	3.16667	4.9	76	849	0.849	796	0.796	18	22	856_3	856
197	3.28333	4.9	76	831	0.831	789	0.789	14	20.7	856_3	856
199	3.31667	4.9	76	828	0.828	782	0.782	16	21	856_3	856
203	3.38333	4.9	76	999	0.999	959	0.959	15	26	856_3	856
205	3.41667	4.9	75	983	0.983	968	0.968	15	26.9	856_3	856
208	3.46667	4.9	75	834	0.834	819	0.819	16	23	856_3	856
212	3.53333	4.9	75	827	0.827	820	0.82	15	22.5	856_3	856
219	3.65	4.9	75	830	0.83	848	0.848	13	23.3	856_3	856
222	3.7	4.9	75	813	0.813	839	0.839	15	24.2	856_3	856
226	3.76667	4.9	75	903	0.903	925	0.925	15	26	856_3	856
229	3.81667	4.9	75	825	0.825	838	0.838	14	23.4	856_3	856
232	3.86667	4.9	75	760	0.76	774	0.774	15	22	856_3	856
235	3.91667	4.9	75	833	0.833	840	0.84	14	23.3	856_3	856
239	3.98333	4.9	75	897	0.897	894	0.894	15	24.8	856_3	856
241	4.01667	4.9	75	853	0.853	817	0.817	19	23.1	856_3	856
243	4.05	4.9	74	871	0.871	838	0.838	20	23.8	856_3	856
247	4.11667	4.9	74	768	0.768	738	0.738	20	21.2	856_3	856
252	4.2	4.9	74	798	0.798	762	0.762	17	20.6	856_3	856
256	4.26667	4.9	74	786	0.786	747	0.747	16	20	856_3	856
260	4.33333	4.9	74	753	0.753	701	0.701	15	19	856_3	856
264	4.4	4.9	73	752	0.752	701	0.701	15	19	856_3	856
267	4.45	4.9	73	757	0.757	711	0.711	15	19.1	856_3	856
273	4.55	4.9	73	796	0.796	807	0.807	14	22.9	856_3	856
278	4.63333	4.9	73	800	0.8	803	0.803	14	22.8	856_3	856
280	4.66667	4.9	74	773	0.773	792	0.792	14	22.9	856_3	856
285	4.75	4.9	75	916	0.916	945	0.945	13	26.9	856_3	856
288	4.8	4.9	77	881	0.881	928	0.928	14	26.6	856_3	856
289	4.81667	4.9	78	707	0.707	755	0.755	16	22.8	856_3	856
294	4.9	4.9	78	838	0.838	872	0.872	14	25.3	856_3	856
298	4.96667	4.9	78	836	0.836	827	0.827	16	22.5	856_3	856
302	5.03333	4.9	78	964	0.964	982	0.982	17	27.6	856_3	856
304	5.06667	4.9	78	993	0.993	1016	1.016	18	29	856_3	856
309	5.15	4.9	79	978	0.978	1038	1.038	17	29.8	856_3	856
312	5.2	4.9	79	985	0.985	1053	1.053	16	30	856_3	856
313	5.21667	6.1	81	1010	1.01	1071	1.071	17	30.4	856_3	856
315	5.25	6.1	82	913	0.913	989	0.989	21	29	856_3	856
319	5.31667	6.1	84	1007	1.007	1120	1.12	21	33.6	856_3	856
321	5.35	6.1	86	895	0.895	989	0.989	23	30.1	856_3	856
327	5.45	6.1	89	1082	1.082	1248	1.248	18	35.3	856_3	856
330	5.5	6.1	93	1070	1.07	1213	1.213	20	33.2	856_3	856
332	5.53333	6.1	96	1119	1.119	1278	1.278	19	34.6	856_3	856
335	5.58333	6.1	99	1205	1.205	1378	1.378	19	36.9	856_3	856
340	5.66667	6.1	102	1315	1.315	1548	1.548	16	40.8	856_3	856
343	5.71667	6.1	103	1211	1.211	1396	1.396	17	36.4	856_3	856
346	5.76667	6.1	104	1300	1.3	1496	1.496	18	39.6	856_3	856
351	5.85	6.1	104	1307	1.307	1502	1.502	19	39.5	856_3	856
355	5.91667	6.1	104	1372	1.372	1562	1.562	18	40.5	856_3	856
357	5.95	6.1	104	1391	1.391	1568	1.568	19	40.7	856_3	856
360	6	6.1	104	1417	1.417	1573	1.573	19	40.4	856_3	856
362	6.03333	6.1	103	1400	1.4	1488	1.488	21	38	856_3	856
367	6.11667	6.1	103	1448	1.448	1598	1.598	18	40.8	856_3	856
370	6.16667	6.1	102	1407	1.407	1537	1.537	19	39.3	856_3	856
372	6.2	6.1	102	1365	1.365	1422	1.422	22	36.3	856_3	856
374	6.23333	7	101	1341	1.341	1351	1.351	25	35.2	856_3	856
377	6.28333	7	101	1405	1.405	1396	1.396	24	36	856_3	856
381	6.35	7	102	1507	1.507	1565	1.565	21	40	856_3	856
384	6.4	7	102	1536	1.536	1603	1.603	20	41	856_3	856
387	6.45	7	103	1442	1.442	1446	1.446	24	37.2	856_3	856
391	6.51667	7	105	1577	1.577	1636	1.636	20	41.6	856_3	856
393	6.55	7	106	1624	1.624	1694	1.694	21	43.3	856_3	856
394	6.56667	7	107	1634	1.634	1703	1.703	23	44.2	856_3	856
397	6.61667	7	108	1666	1.666	1758	1.758	22	44.5	856_3	856
399	6.65	7	109	1627	1.627	1684	1.684	29	43.2	856_3	856
403	6.71667	7	110	1721	1.721	1841	1.841	25	46.9	856_3	856
406	6.76667	7	110	1721	1.721	1865	1.865	22	46.9	856_3	856
408	6.8	7	110	1628	1.628	1731	1.731	26	43.8	856_3	856
412	6.86667	7	111	1695	1.695	1875	1.875	22	47	856_3	856
414	6.9	7	111	1695	1.695	1875	1.875	22	47	856_3	856
416	6.93333	7	111	1674	1.674	1860	1.86	24	48.1	856_3	856
418	6.96667	7	111	1661	1.661	1846	1.846	23	47.2	856_3	856
421	7.01667	7	111	1661	1.661	1845	1.845	23	47.2	856_3	856
423	7.05	7	111	1670	1.67	1844	1.844	24	47.4	856_3	856
425	7.08333	7	111	1672	1.672	1845	1.845	25	47.7	856_3	856
428	7.13333	7	111	1563	1.563	1650	1.65	30	42.9	856_3	856
433	7.21667	7	111	1655	1.655	1797	1.797	24	46.1	856_3	856
435	7.25	8	111	1645	1.645	1793	1.793	23	45.6	856_3	856
439	7.31667	8	111	1605	1.605	1753	1.753	22	44.4	856_3	856
443	7.38333	8	111	1605	1.605	1753	1.753	22	44.4	856_3	856
445	7.41667	8	112	1644	1.644	1804	1.804	21	45.5	856_3	856
447	7.45	8	112	1667	1.667	1828	1.828	21	46.1	856_3	856
449	7.48333	8	113	1688	1.688	1846	1.846	22	47	856_3	856
452	7.53333	8	113	1780	1.78	1947	1.947	23	49.4	856_3	856
454	7.56667	8	113	1823	1.823	2030	2.03	24	52.2	856_3	856
456	7.6	8	113	1823	1.823	2048	2.048	23	52.8	856_3	856
458	7.63333	8	112	1693	1.693	1888	1.888	28	50	856_3	856
460	7.66667	8	112	1680	1.68	1876	1.876	29	50	856_3	856
462	7.7	8	111	1684	1.684	1894	1.894	29	50.9	856_3	856
464	7.73333	8	111	1684	1.684	1894	1.894	29	50.9	856_3	856
466	7.76667	8	110	1676	1.676	1874	1.874	29	50.5	856_3	856
470	7.83333	8	109	1689	1.689	1866	1.866	31	50.1	856_3	856
472	7.86667	8	108	1694	1.694	1860	1.86	31	49.8	856_3	856
474	7.9	8	107	1652	1.652	1818	1.818	30	48.7	856_3	856
475	7.91667	8	105	1609	1.609	1752	1.752	32	47.7	856_3	856
478	7.96667	8	103	1654	1.654	1800	1.8	31	48.5	856_3	856
482	8.03333	8	100	1666	1.666	1872	1.872	25	49.2	856_3	856
484	8.06667	8	99	1635	1.635	1845	1.845	24	48.4	856_3	856
486	8.1	8	99	1554	1.554	1743	1.743	26	46.4	856_3	856
489	8.15	8	99	1636	1.636	1828	1.828	25	48.3	856_3	856
492	8.2	8	101	1686	1.686	1884	1.884	23	48.6	856_3	856
493	8.21667	8	104	1709	1.709	1896	1.896	23	48.5	856_3	856
495	8.25	8	108	1673	1.673	1829	1.829	24	46.7	856_3	856
496	8.26667	9	112	1734	1.734	1796	1.796	32	46.9	856_3	856
499	8.31667	9	114	1951	1.951	2070	2.07	28	53.3	856_3	856
501	8.35	9	116	2000	2	2138	2.138	29	55.4	856_3	856
503	8.38333	9	116	1863	1.863	1948	1.948	32	50.8	856_3	856
504	8.4	9	117	1862	1.862	1944	1.944	36	52.4	856_3	856
507	8.45	9	118	2081	2.081	2297	2.297	31	60.6	856_3	856
510	8.5	9	119	2097	2.097	2337	2.337	28	60.6	856_3	856
512	8.53333	9	120	2066	2.066	2327	2.327	28	59.9	856_3	856
515	8.58333	9	121	1918	1.918	2173	2.173	27	55.8	856_3	856
517	8.61667	9	121	1918	1.918	2200	2.2	25	55.5	856_3	856
519	8.65	9	122	1929	1.929	2221	2.221	26	56.4	856_3	856
521	8.68333	9	122	1983	1.983	2291	2.291	25	57.6	856_3	856
523	8.71667	9	122	1933	1.933	2227	2.227	26	56.6	856_3	856
525	8.75	9	122	1944	1.944	2221	2.221	27	56.5	856_3	856
528	8.8	9	122	1990	1.99	2289	2.289	27	57.8	856_3	856
531	8.85	9	122	1995	1.995	2231	2.231	31	56.7	856_3	856
533	8.88333	9	122	1978	1.978	2167	2.167	32	55.7	856_3	856
535	8.91667	9	122	2037	2.037	2305	2.305	27	58.8	856_3	856
537	8.95	9	122	2024	2.024	2270	2.27	29	58.6	856_3	856
540	9	9	122	2111	2.111	2418	2.418	25	62.3	856_3	856
542	9.03333	9	122	2106	2.106	2421	2.421	26	62.6	856_3	856
543	9.05	9	122	2065	2.065	2317	2.317	30	60.4	856_3	856
547	9.11667	9	122	2086	2.086	2421	2.421	26	62.3	856_3	856
549	9.15	9	123	2087	2.087	2430	2.43	24	62	856_3	856
551	9.18333	9	123	1998	1.998	2291	2.291	27	58.4	856_3	856
555	9.25	9	123	2006	2.006	2353	2.353	23	58.9	856_3	856
557	9.28333	10.1	122	1955	1.955	2251	2.251	27	57.4	856_3	856
558	9.3	10.1	122	1946	1.946	2239	2.239	26	56.5	856_3	856
560	9.33333	10.1	122	1957	1.957	2237	2.237	27	56.4	856_3	856
563	9.38333	10.1	123	1975	1.975	2255	2.255	27	56.4	856_3	856
565	9.41667	10.1	123	2006	2.006	2288	2.288	26	57.1	856_3	856
568	9.46667	10.1	124	1988	1.988	2262	2.262	27	56.4	856_3	856
569	9.48333	10.1	124	1938	1.938	2126	2.126	34	55	856_3	856
573	9.55	10.1	125	2107	2.107	2345	2.345	31	59.9	856_3	856
574	9.56667	10.1	125	2153	2.153	2412	2.412	30	61.6	856_3	856
576	9.6	10.1	125	2161	2.161	2436	2.436	30	62.6	856_3	856
578	9.63333	10.1	126	2138	2.138	2402	2.402	34	62.7	856_3	856
581	9.68333	10.1	126	2175	2.175	2504	2.504	31	64.3	856_3	856
583	9.71667	10.1	126	2171	2.171	2532	2.532	29	64.5	856_3	856
584	9.73333	10.1	127	2193	2.193	2552	2.552	30	65.3	856_3	856
586	9.76667	10.1	127	2119	2.119	2461	2.461	31	63.4	856_3	856
589	9.81667	10.1	127	2172	2.172	2551	2.551	26	63.6	856_3	856
591	9.85	10.1	127	2161	2.161	2543	2.543	25	63.2	856_3	856
593	9.88333	10.1	127	2161	2.161	2543	2.543	25	63.2	856_3	856
594	9.9	10.1	127	2132	2.132	2456	2.456	31	63.1	856_3	856
597	9.95	10.1	127	2167	2.167	2467	2.467	33	63.3	856_3	856
599	9.98333	10.1	127	2148	2.148	2443	2.443	33	62.7	856_3	856
600	10	10.1	127	2163	2.163	2456	2.456	32	63	856_3	856
601	10.0167	10.1	128	2082	2.082	2280	2.28	45	62.7	856_3	856
605	10.0833	10.1	128	2218	2.218	2475	2.475	34	63.2	856_3	856
607	10.1167	10.1	128	2206	2.206	2474	2.474	32	62.9	856_3	856
609	10.15	10.1	128	2264	2.264	2593	2.593	25	63.4	856_3	856
610	10.1667	10.1	128	2190	2.19	2458	2.458	31	62.2	856_3	856
614	10.2333	10.1	129	2269	2.269	2587	2.587	25	62.2	856_3	856
615	10.25	10.1	129	2280	2.28	2612	2.612	24	63	856_3	856
617	10.2833	11.1	129	2332	2.332	2681	2.681	23	63.9	856_3	856
620	10.3333	11.1	129	2324	2.324	2700	2.7	24	65	856_3	856
623	10.3833	11.1	129	2328	2.328	2731	2.731	22	65.4	856_3	856
624	10.4	11.1	129	2275	2.275	2674	2.674	23	65.2	856_3	856
626	10.4333	11.1	129	2327	2.327	2726	2.726	23	66.1	856_3	856
627	10.45	11.1	129	2322	2.322	2718	2.718	30	69.5	856_3	856
628	10.4667	11.1	129	2355	2.355	2766	2.766	30	70.9	856_3	856
629	10.4833	11.1	130	2295	2.295	2703	2.703	30	69.6	856_3	856
632	10.5333	11.1	130	2317	2.317	2752	2.752	32	70.8	856_3	856
634	10.5667	11.1	131	2339	2.339	2749	2.749	36	71.3	856_3	856
636	10.6	11.1	132	2382	2.382	2804	2.804	34	72	856_3	856
637	10.6167	11.1	132	2351	2.351	2746	2.746	35	70.3	856_3	856
640	10.6667	11.1	133	2301	2.301	2678	2.678	34	68.4	856_3	856
641	10.6833	11.1	133	2300	2.3	2678	2.678	34	68.4	856_3	856
644	10.7333	11.1	133	2426	2.426	2858	2.858	29	70.9	856_3	856
645	10.75	11.1	133	2405	2.405	2781	2.781	34	71.3	856_3	856
646	10.7667	11.1	133	2410	2.41	2794	2.794	35	72.5	856_3	856
648	10.8	11.1	133	2439	2.439	2840	2.84	37	74	856_3	856
650	10.8333	11.1	133	2452	2.452	2920	2.92	31	74.7	856_3	856
653	10.8833	11.1	132	2450	2.45	2949	2.949	29	74.8	856_3	856
654	10.9	11.1	132	2371	2.371	2843	2.843	34	74.3	856_3	856
655	10.9167	11.1	131	2349	2.349	2802	2.802	34	73.3	856_3	856
658	10.9667	11.1	130	2368	2.368	2868	2.868	28	72.6	856_3	856
660	11	11.1	129	2356	2.356	2857	2.857	27	71.7	856_3	856
661	11.0167	11.1	128	2317	2.317	2774	2.774	31	70.7	856_3	856
663	11.05	11.1	127	2317	2.317	2774	2.774	31	70.7	856_3	856
664	11.0667	11.1	127	2268	2.268	2698	2.698	34	70.1	856_3	856
667	11.1167	11.1	128	2376	2.376	2847	2.847	29	71.6	856_3	856
668	11.1333	11.1	129	2377	2.377	2833	2.833	29	71	856_3	856
671	11.1833	11.1	131	2370	2.37	2784	2.784	29	68.9	856_3	856
674	11.2333	11.1	132	2396	2.396	2812	2.812	28	69.3	856_3	856
675	11.25	11.1	134	2431	2.431	2838	2.838	28	69.5	856_3	856
678	11.3	12	136	2418	2.418	2818	2.818	28	69.2	856_3	856
680	11.3333	12	137	2451	2.451	2864	2.864	26	69.4	856_3	856
683	11.3833	12	137	2400	2.4	2799	2.799	25	67.2	856_3	856
684	11.4	12	138	2415	2.415	2795	2.795	29	68.5	856_3	856
686	11.4333	12	138	2448	2.448	2789	2.789	35	70.3	856_3	856
687	11.45	12	139	2451	2.451	2818	2.818	32	69.4	856_3	856
688	11.4667	12	139	2498	2.498	2923	2.923	28	70.9	856_3	856
689	11.4833	12	139	2406	2.406	2779	2.779	33	69.3	856_3	856
699	11.65	12	139	2455	2.455	2887	2.887	31	71.4	856_3	856
700	11.6667	12	140	2439	2.439	2863	2.863	36	73.5	856_3	856
701	11.6833	12	140	2397	2.397	2841	2.841	38	74.4	856_3	856
704	11.7333	12	140	2383	2.383	2911	2.911	34	75.7	856_3	856
705	11.75	12	140	2456	2.456	3010	3.01	34	77.4	856_3	856
706	11.7667	12	140	2414	2.414	2963	2.963	34	76.3	856_3	856
709	11.8167	12	140	2431	2.431	3015	3.015	29	75.9	856_3	856
711	11.85	12	140	2358	2.358	2918	2.918	34	75.6	856_3	856
712	11.8667	12	140	2315	2.315	2865	2.865	31	73.5	856_3	856
714	11.9	12	140	2370	2.37	2925	2.925	31	74.5	856_3	856
715	11.9167	12	140	2370	2.37	2888	2.888	33	73.3	856_3	856
718	11.9667	12	140	2319	2.319	2874	2.874	28	71.5	856_3	856
720	12	12	140	2319	2.319	2870	2.87	27	70.7	856_3	856
722	12.0333	12	141	2301	2.301	2809	2.809	29	69.7	856_3	856
724	12.0667	12	141	2395	2.395	2916	2.916	29	71.8	856_3	856
726	12.1	12	141	2390	2.39	2912	2.912	29	72.4	856_3	856
727	12.1167	12	141	2391	2.391	2912	2.912	29	72.4	856_3	856
730	12.1667	12	141	2398	2.398	2946	2.946	27	73.1	856_3	856
732	12.2	12	141	2427	2.427	2938	2.938	30	73.7	856_3	856
733	12.2167	12	142	2436	2.436	2958	2.958	30	74.1	856_3	856
735	12.25	12	142	2434	2.434	2971	2.971	29	74.2	856_3	856
736	12.2667	12	142	2433	2.433	2963	2.963	32	74.9	856_3	856
739	12.3167	13	142	2449	2.449	3030	3.03	29	76.5	856_3	856
740	12.3333	13	142	2453	2.453	3042	3.042	30	77	856_3	856
742	12.3667	13	142	2432	2.432	2997	2.997	33	76.3	856_3	856
744	12.4	13	142	2451	2.451	3033	3.033	33	76.3	856_3	856
747	12.45	13	143	2450	2.45	3033	3.033	33	76.3	856_3	856
748	12.4667	13	143	2494	2.494	3064	3.064	36	77.5	856_3	856
749	12.4833	13	144	2468	2.468	3032	3.032	35	76.5	856_3	856
751	12.5167	13	144	2445	2.445	2988	2.988	32	73.1	856_3	856
752	12.5333	13	144	2444	2.444	2987	2.987	32	73.1	856_3	856
754	12.5667	13	144	2415	2.415	2934	2.934	34	72.7	856_3	856
756	12.6	13	145	2440	2.44	2978	2.978	31	73.3	856_3	856
759	12.65	13	145	2428	2.428	2913	2.913	37	74	856_3	856
760	12.6667	13	145	2422	2.422	2884	2.884	39	73.3	856_3	856
761	12.6833	13	145	2491	2.491	2953	2.953	38	74.7	856_3	856
763	12.7167	13	145	2557	2.557	3064	3.064	35	77	856_3	856
765	12.75	13	145	2557	2.557	3064	3.064	35	77	856_3	856
766	12.7667	13	145	2598	2.598	3121	3.121	35	78.4	856_3	856
768	12.8	13	145	2596	2.596	3145	3.145	37	80.5	856_3	856
769	12.8167	13	145	2587	2.587	3162	3.162	36	80.9	856_3	856
771	12.85	13	145	2621	2.621	3208	3.208	35	81.5	856_3	856
773	12.8833	13	145	2565	2.565	3203	3.203	33	81	856_3	856
774	12.9	13	145	2577	2.577	3218	3.218	37	82.7	856_3	856
775	12.9167	13	145	2543	2.543	3166	3.166	37	81.6	856_3	856
777	12.95	13	145	2574	2.574	3210	3.21	37	82.3	856_3	856
779	12.9833	13	145	2525	2.525	3141	3.141	38	81.1	856_3	856
780	13	13	146	2489	2.489	3105	3.105	39	80.7	856_3	856
782	13.0333	13	146	2487	2.487	3147	3.147	33	80.1	856_3	856
784	13.0667	13	146	2506	2.506	3145	3.145	35	79.9	856_3	856
785	13.0833	13	147	2476	2.476	3101	3.101	34	78.8	856_3	856
787	13.1167	13	147	2496	2.496	3124	3.124	35	79.2	856_3	856
788	13.1333	13	147	2496	2.496	3124	3.124	35	79.2	856_3	856
789	13.15	13	148	2490	2.49	3095	3.095	38	79.5	856_3	856
791	13.1833	13	148	2632	2.632	3299	3.299	36	84	856_3	856
792	13.2	13	148	2585	2.585	3207	3.207	44	84.9	856_3	856
794	13.2333	13	148	2571	2.571	3211	3.211	45	86.1	856_3	856
797	13.2833	13	148	2522	2.522	3167	3.167	46	85.5	856_3	856
798	13.3	14.1	148	2535	2.535	3160	3.16	44	84	856_3	856
799	13.3167	14.1	149	2482	2.482	3037	3.037	45	80.7	856_3	856
801	13.35	14.1	149	2495	2.495	3044	3.044	45	80.8	856_3	856
802	13.3667	14.1	149	2495	2.495	3044	3.044	45	80.8	856_3	856
803	13.3833	14.1	149	2529	2.529	3079	3.079	44	81.7	856_3	856
806	13.4333	14.1	149	2498	2.498	3069	3.069	41	79.7	856_3	856
807	13.45	14.1	149	2597	2.597	3195	3.195	41	82.4	856_3	856
808	13.4667	14.1	149	2603	2.603	3228	3.228	42	84	856_3	856
809	13.4833	14.1	150	2593	2.593	3250	3.25	41	85	856_3	856
812	13.5333	14.1	150	2603	2.603	3270	3.27	41	85.7	856_3	856
813	13.55	14.1	151	2602	2.602	3270	3.27	41	85.7	856_3	856
814	13.5667	14.1	151	2655	2.655	3346	3.346	41	86.9	856_3	856
815	13.5833	14.1	151	2655	2.655	3346	3.346	41	86.9	856_3	856
817	13.6167	14.1	152	2675	2.675	3391	3.391	39	87.9	856_3	856
818	13.6333	14.1	152	2735	2.735	3480	3.48	39	89.5	856_3	856
819	13.65	14.1	153	2677	2.677	3404	3.404	39	88.3	856_3	856
822	13.7	14.1	153	2690	2.69	3432	3.432	39	88.7	856_3	856
823	13.7167	14.1	153	2690	2.69	3432	3.432	39	88.7	856_3	856
824	13.7333	14.1	154	2694	2.694	3452	3.452	39	89.2	856_3	856
825	13.75	14.1	154	2695	2.695	3452	3.452	39	89.2	856_3	856
827	13.7833	14.1	154	2671	2.671	3444	3.444	39	89.1	856_3	856
828	13.8	14.1	154	2637	2.637	3405	3.405	40	89.1	856_3	856
830	13.8333	14.1	154	2641	2.641	3443	3.443	35	87.8	856_3	856
831	13.85	14.1	154	2730	2.73	3528	3.528	40	91.6	856_3	856
833	13.8833	14.1	154	2679	2.679	3474	3.474	39	90.2	856_3	856
834	13.9	14.1	154	2636	2.636	3411	3.411	40	88.5	856_3	856
835	13.9167	14.1	154	2667	2.667	3421	3.421	46	91.6	856_3	856
838	13.9667	14.1	154	2587	2.587	3340	3.34	41	87.9	856_3	856
839	13.9833	14.1	154	2638	2.638	3394	3.394	41	88.4	856_3	856
840	14	14.1	154	2690	2.69	3425	3.425	46	91.2	856_3	856
842	14.0333	14.1	154	2631	2.631	3396	3.396	41	88.4	856_3	856
843	14.05	14.1	154	2671	2.671	3431	3.431	42	89	856_3	856
845	14.0833	14.1	154	2686	2.686	3462	3.462	42	90	856_3	856
847	14.1167	14.1	154	2664	2.664	3457	3.457	37	87.8	856_3	856
848	14.1333	14.1	154	2719	2.719	3496	3.496	42	90.7	856_3	856
849	14.15	14.1	154	2660	2.66	3428	3.428	41	89	856_3	856
851	14.1833	14.1	154	2648	2.648	3408	3.408	42	89.2	856_3	856
853	14.2167	14.1	154	2644	2.644	3386	3.386	42	88.4	856_3	856
854	14.2333	14.1	154	2644	2.644	3386	3.386	42	88.4	856_3	856
855	14.25	14.1	154	2633	2.633	3365	3.365	42	88.1	856_3	856
857	14.2833	14.1	154	2668	2.668	3424	3.424	42	89.4	856_3	856
859	14.3167	14.1	154	2690	2.69	3457	3.457	42	89.7	856_3	856
860	14.3333	15.1	154	2754	2.754	3547	3.547	41	91.9	856_3	856
861	14.35	15.1	154	2785	2.785	3594	3.594	41	92.4	856_3	856
863	14.3833	15.1	154	2785	2.785	3594	3.594	41	92.4	856_3	856
865	14.4167	15.1	154	2748	2.748	3540	3.54	42	91.9	856_3	856
867	14.45	15.1	154	2757	2.757	3581	3.581	38	90.6	856_3	856
868	14.4667	15.1	154	2801	2.801	3617	3.617	42	93.6	856_3	856
869	14.4833	15.1	154	2766	2.766	3594	3.594	42	93.3	856_3	856
870	14.5	15.1	155	2679	2.679	3483	3.483	43	91.2	856_3	856
872	14.5333	15.1	155	2718	2.718	3564	3.564	40	91.3	856_3	856
874	14.5667	15.1	156	2747	2.747	3590	3.59	42	93.4	856_3	856
875	14.5833	15.1	156	2764	2.764	3626	3.626	41	93.3	856_3	856
876	14.6	15.1	157	2810	2.81	3699	3.699	41	94.6	856_3	856
879	14.65	15.1	157	2733	2.733	3599	3.599	40	92	856_3	856
880	14.6667	15.1	157	2779	2.779	3670	3.67	37	92	856_3	856
881	14.6833	15.1	158	2792	2.792	3669	3.669	41	94.6	856_3	856
883	14.7167	15.1	158	2797	2.797	3701	3.701	42	95.1	856_3	856
884	14.7333	15.1	158	2807	2.807	3730	3.73	42	95.2	856_3	856
886	14.7667	15.1	158	2751	2.751	3667	3.667	42	94.6	856_3	856
887	14.7833	15.1	158	2798	2.798	3726	3.726	42	96.2	856_3	856
888	14.8	15.1	158	2876	2.876	3842	3.842	41	99	856_3	856
890	14.8333	15.1	158	2790	2.79	3735	3.735	42	96.8	856_3	856
892	14.8667	15.1	158	2877	2.877	3855	3.855	42	98.8	856_3	856
893	14.8833	15.1	158	2871	2.871	3830	3.83	45	100.4	856_3	856
894	14.9	15.1	158	2863	2.863	3822	3.822	47	101.6	856_3	856
896	14.9333	15.1	159	2846	2.846	3816	3.816	41	98.3	856_3	856
898	14.9667	15.1	159	2791	2.791	3731	3.731	42	96.2	856_3	856
899	14.9833	15.1	159	2783	2.783	3701	3.701	42	95.5	856_3	856
901	15.0167	15.1	159	2905	2.905	3835	3.835	43	98.1	856_3	856
902	15.0333	15.1	159	2881	2.881	3801	3.801	42	97.1	856_3	856
903	15.05	15.1	159	2863	2.863	3786	3.786	42	96.4	856_3	856
906	15.1	15.1	159	2884	2.884	3837	3.837	38	94.8	856_3	856
907	15.1167	15.1	160	2901	2.901	3827	3.827	42	96.9	856_3	856
908	15.1333	15.1	160	2922	2.922	3861	3.861	41	98.5	856_3	856
910	15.1667	15.1	160	2904	2.904	3851	3.851	41	97.6	856_3	856
912	15.2	15.1	160	2866	2.866	3839	3.839	40	97	856_3	856
913	15.2167	15.1	160	2886	2.886	3860	3.86	41	97.9	856_3	856
914	15.2333	15.1	160	2902	2.902	3858	3.858	41	97.7	856_3	856
916	15.2667	15.1	160	2912	2.912	3852	3.852	42	99.1	856_3	856
918	15.3	15.1	160	2899	2.899	3846	3.846	41	98.1	856_3	856
919	15.3167	15.1	161	2899	2.899	3853	3.853	41	97.9	856_3	856
920	15.3333	15.9	161	2878	2.878	3817	3.817	41	98.1	856_3	856
921	15.35	15.9	161	2878	2.878	3817	3.817	41	98.1	856_3	856
923	15.3833	15.9	161	2878	2.878	3817	3.817	41	98.1	856_3	856
924	15.4	15.9	161	2897	2.897	3897	3.897	39	99.6	856_3	856
925	15.4167	15.9	162	2880	2.88	3889	3.889	43	101.7	856_3	856
927	15.45	15.9	162	2822	2.822	3831	3.831	45	103.1	856_3	856
929	15.4833	15.9	162	2782	2.782	3780	3.78	46	101.7	856_3	856
930	15.5	15.9	162	2817	2.817	3855	3.855	45	102.7	856_3	856
931	15.5167	15.9	163	2847	2.847	3904	3.904	44	104.4	856_3	856
933	15.55	15.9	163	2805	2.805	3841	3.841	47	104.1	856_3	856
934	15.5667	15.9	163	2806	2.806	3842	3.842	47	104.1	856_3	856
935	15.5833	15.9	163	2806	2.806	3858	3.858	47	105	856_3	856
937	15.6167	15.9	163	2837	2.837	3925	3.925	46	105.8	856_3	856
938	15.6333	15.9	163	2837	2.837	3926	3.926	46	105.8	856_3	856
939	15.65	15.9	164	2815	2.815	3910	3.91	48	106.5	856_3	856
941	15.6833	15.9	164	2812	2.812	3952	3.952	46	107.5	856_3	856
942	15.7	15.9	164	2851	2.851	4023	4.023	46	109	856_3	856
943	15.7167	15.9	164	2807	2.807	3977	3.977	45	107.7	856_3	856
944	15.7333	15.9	164	2789	2.789	3952	3.952	46	106.4	856_3	856
946	15.7667	15.9	164	2810	2.81	3989	3.989	45	106.8	856_3	856
947	15.7833	15.9	164	2840	2.84	4034	4.034	44	108.1	856_3	856
949	15.8167	15.9	164	2846	2.846	4041	4.041	43	107.3	856_3	856
950	15.8333	15.9	165	2862	2.862	4058	4.058	44	107.7	856_3	856
951	15.85	15.9	165	2835	2.835	4018	4.018	45	107.6	856_3	856
953	15.8833	15.9	165	2850	2.85	4029	4.029	45	108.2	856_3	856
954	15.9	15.9	165	2861	2.861	4059	4.059	44	109.5	856_3	856
955	15.9167	15.9	165	2851	2.851	4046	4.046	46	110	856_3	856
957	15.95	15.9	165	2841	2.841	4049	4.049	45	110	856_3	856
958	15.9667	15.9	165	2841	2.841	4049	4.049	45	110	856_3	856
959	15.9833	15.9	165	2840	2.84	4066	4.066	44	108.7	856_3	856
961	16.0167	15.9	165	2847	2.847	4077	4.077	44	108.7	856_3	856
962	16.0333	15.9	166	2803	2.803	4013	4.013	45	107.8	856_3	856
963	16.05	15.9	166	2823	2.823	4028	4.028	46	108	856_3	856
964	16.0667	15.9	166	2810	2.81	3978	3.978	45	105.4	856_3	856
966	16.1	15.9	166	2802	2.802	3967	3.967	44	104.6	856_3	856
967	16.1167	15.9	166	2867	2.867	4044	4.044	43	105.2	856_3	856
968	16.1333	15.9	165	2890	2.89	4049	4.049	45	106.3	856_3	856
970	16.1667	15.9	165	2853	2.853	4009	4.009	43	105.6	856_3	856
971	16.1833	15.9	165	2891	2.891	4085	4.085	45	108.3	856_3	856
972	16.2	15.9	165	2865	2.865	4072	4.072	44	108.4	856_3	856
974	16.2333	15.9	165	2867	2.867	4080	4.08	45	109.7	856_3	856
975	16.25	15.9	165	2879	2.879	4115	4.115	45	110.3	856_3	856
976	16.2667	15.9	165	2863	2.863	4124	4.124	45	111.2	856_3	856
978	16.3	15.9	165	2832	2.832	4093	4.093	46	110.6	856_3	856
979	16.3167	17	165	2824	2.824	4102	4.102	44	110.8	856_3	856
980	16.3333	17	165	2825	2.825	4102	4.102	44	110.8	856_3	856
982	16.3667	17	165	2831	2.831	4098	4.098	44	110.1	856_3	856
983	16.3833	17	165	2844	2.844	4104	4.104	44	109.9	856_3	856
984	16.4	17	165	2857	2.857	4114	4.114	45	110.3	856_3	856
986	16.4333	17	165	2862	2.862	4115	4.115	45	110.1	856_3	856
987	16.45	17	166	2877	2.877	4116	4.116	46	110.6	856_3	856
988	16.4667	17	166	2877	2.877	4116	4.116	46	110.6	856_3	856
989	16.4833	17	166	2867	2.867	4107	4.107	46	110.6	856_3	856
991	16.5167	17	166	2872	2.872	4122	4.122	46	111.7	856_3	856
992	16.5333	17	167	2867	2.867	4138	4.138	46	112.1	856_3	856
993	16.55	17	167	2862	2.862	4146	4.146	46	112.2	856_3	856
995	16.5833	17	167	2849	2.849	4147	4.147	46	113.2	856_3	856
996	16.6	17	167	2856	2.856	4182	4.182	46	114	856_3	856
997	16.6167	17	167	2867	2.867	4215	4.215	46	114.7	856_3	856
999	16.65	17	168	2867	2.867	4215	4.215	46	114.7	856_3	856
1000	16.6667	17	168	2862	2.862	4207	4.207	46	114	856_3	856
1001	16.6833	17	168	2870	2.87	4225	4.225	46	114.8	856_3	856
1003	16.7167	17	169	2861	2.861	4238	4.238	46	115.5	856_3	856
1004	16.7333	17	169	2837	2.837	4210	4.21	46	115.1	856_3	856
1005	16.75	17	169	2832	2.832	4202	4.202	46	114.9	856_3	856
1006	16.7667	17	169	2816	2.816	4187	4.187	46	114.5	856_3	856
1008	16.8	17	169	2810	2.81	4183	4.183	46	114.3	856_3	856
1009	16.8167	17	169	2795	2.795	4185	4.185	45	114.4	856_3	856
1010	16.8333	17	169	2779	2.779	4161	4.161	45	113.8	856_3	856
1012	16.8667	17	169	2769	2.769	4147	4.147	45	113	856_3	856
1013	16.8833	17	169	2783	2.783	4163	4.163	45	112.8	856_3	856
1014	16.9	17	169	2770	2.77	4148	4.148	45	112.5	856_3	856
1016	16.9333	17	169	2766	2.766	4152	4.152	45	112.5	856_3	856
1017	16.95	17	169	2779	2.779	4165	4.165	45	113	856_3	856
1018	16.9667	17	169	2797	2.797	4185	4.185	46	113	856_3	856
1019	16.9833	17	169	2808	2.808	4203	4.203	46	113.2	856_3	856
1021	17.0167	17	169	2819	2.819	4224	4.224	46	113.2	856_3	856
1022	17.0333	17	169	2829	2.829	4237	4.237	46	113.7	856_3	856
1023	17.05	17	169	2829	2.829	4237	4.237	46	113.7	856_3	856
1025	17.0833	17	169	2825	2.825	4234	4.234	46	113.8	856_3	856
1026	17.1	17	169	2828	2.828	4245	4.245	46	113.9	856_3	856
1027	17.1167	17	169	2826	2.826	4244	4.244	46	114	856_3	856
1029	17.15	17	169	2827	2.827	4243	4.243	45	113.4	856_3	856
1030	17.1667	17	169	2835	2.835	4252	4.252	46	113.4	856_3	856
1031	17.1833	17	169	2835	2.835	4270	4.27	46	113.4	856_3	856
1033	17.2167	17	169	2852	2.852	4303	4.303	46	113.9	856_3	856
1034	17.2333	17	169	2856	2.856	4312	4.312	46	114.3	856_3	856
1035	17.25	17	169	2832	2.832	4273	4.273	46	113.5	856_3	856
1037	17.2833	17	169	2820	2.82	4248	4.248	47	112.9	856_3	856
1038	17.3	17	169	2856	2.856	4290	4.29	46	113.1	856_3	856
1039	17.3167	17	169	2837	2.837	4251	4.251	49	113.5	856_3	856
1040	17.3333	17	169	2828	2.828	4223	4.223	48	111.7	856_3	856
1041	17.35	17	169	2803	2.803	4154	4.154	49	109.2	856_3	856
1042	17.3667	17	169	2830	2.83	4189	4.189	48	108.8	856_3	856
1044	17.4	17	169	2762	2.762	4100	4.1	44	104.5	856_3	856
1045	17.4167	17	169	2778	2.778	4095	4.095	46	105.4	856_3	856
1046	17.4333	4.9	169	2772	2.772	4081	4.081	47	106.2	856_3	856
1048	17.4667	4.9	169	2757	2.757	4120	4.12	43	106.3	856_3	856
1049	17.4833	4.9	169	2878	2.878	4266	4.266	48	111.3	856_3	856
1051	17.5167	4.9	168	2790	2.79	4176	4.176	44	109.1	856_3	856
1052	17.5333	4.9	168	2757	2.757	4190	4.19	42	110.8	856_3	856
1055	17.5833	4.9	167	2716	2.716	4196	4.196	41	111.3	856_3	856
1056	17.6	4.9	167	2685	2.685	4238	4.238	38	110.8	856_3	856
1058	17.6333	4.9	166	2667	2.667	4260	4.26	36	111.3	856_3	856
1060	17.6667	4.9	166	2601	2.601	4195	4.195	35	109.5	856_3	856
1062	17.7	4.9	165	2545	2.545	4140	4.14	32	106.4	856_3	856
1063	17.7167	4.9	164	2562	2.562	4171	4.171	34	108.3	856_3	856
1066	17.7667	4.9	163	2481	2.481	4069	4.069	32	104.1	856_3	856
1067	17.7833	4.9	163	2530	2.53	4124	4.124	34	106.8	856_3	856
1069	17.8167	4.9	162	2451	2.451	4027	4.027	33	104	856_3	856
1071	17.85	4.9	161	2445	2.445	4021	4.021	33	103.4	856_3	856
1074	17.9	4.9	159	2402	2.402	3963	3.963	31	100.4	856_3	856
1075	17.9167	4.9	158	2401	2.401	3943	3.943	33	100.3	856_3	856
1077	17.95	4.9	157	2399	2.399	3953	3.953	31	98.8	856_3	856
1079	17.9833	4.9	157	2423	2.423	3969	3.969	33	99.3	856_3	856
1081	18.0167	4.9	156	2356	2.356	3898	3.898	31	96.6	856_3	856
1083	18.05	4.9	155	2397	2.397	3968	3.968	33	99.7	856_3	856
1086	18.1	4.9	154	2288	2.288	3809	3.809	29	93.9	856_3	856
1088	18.1333	4.9	153	2397	2.397	3968	3.968	33	99.7	856_3	856
1089	18.15	4.9	152	2392	2.392	3972	3.972	33	99.9	856_3	856
1091	18.1833	4.9	151	2245	2.245	3718	3.718	33	93.3	856_3	856
1093	18.2167	4.9	149	2171	2.171	3616	3.616	33	91	856_3	856
1095	18.25	4.9	148	2122	2.122	3555	3.555	33	89.8	856_3	856
1096	18.2667	4.9	147	2016	2.016	3395	3.395	34	87.6	856_3	856
1099	18.3167	4.9	145	2017	2.017	3396	3.396	34	87.6	856_3	856
1101	18.35	4.9	144	1935	1.935	3336	3.336	31	85.1	856_3	856
1103	18.3833	4.9	142	1935	1.935	3336	3.336	31	85.1	856_3	856
1104	18.4	4.9	141	1928	1.928	3352	3.352	31	84.6	856_3	856
1107	18.45	4.9	139	1859	1.859	3308	3.308	29	84	856_3	856
1108	18.4667	4.9	136	1811	1.811	3258	3.258	31	85.2	856_3	856
1111	18.5167	4.9	133	1765	1.765	3221	3.221	27	81.8	856_3	856
1113	18.55	4.9	130	1727	1.727	3172	3.172	28	82.7	856_3	856
1115	18.5833	4.9	127	1691	1.691	3102	3.102	30	82.9	856_3	856
1117	18.6167	4.9	124	1602	1.602	2946	2.946	29	77.9	856_3	856
1118	18.6333	4.9	123	1603	1.603	2968	2.968	29	78.5	856_3	856
1120	18.6667	4.9	122	1586	1.586	2939	2.939	30	79.4	856_3	856
1122	18.7	4.9	122	1559	1.559	2878	2.878	31	77.6	856_3	856
1124	18.7333	4.9	123	1519	1.519	2759	2.759	34	75.6	856_3	856
1126	18.7667	4.9	123	1579	1.579	2912	2.912	32	80.1	856_3	856
1128	18.8	4.9	124	1561	1.561	2871	2.871	33	79.1	856_3	856
1129	18.8167	4.9	124	1589	1.589	2951	2.951	33	82.6	856_3	856
1132	18.8667	4.9	124	1540	1.54	2915	2.915	31	82.6	856_3	856
1133	18.8833	4.9	124	1541	1.541	2915	2.915	31	82.6	856_3	856
1135	18.9167	4.9	123	1520	1.52	2894	2.894	31	82.3	856_3	856
1137	18.95	4.9	122	1547	1.547	2948	2.948	31	84.8	856_3	856
1140	19	4.9	121	1469	1.469	2833	2.833	31	82.7	856_3	856
1142	19.0333	4.9	120	1446	1.446	2771	2.771	31	80.2	856_3	856
1145	19.0833	4.9	119	1391	1.391	2678	2.678	28	76.4	856_3	856
1147	19.1167	4.9	119	1358	1.358	2546	2.546	29	71.2	856_3	856
1148	19.1333	4.9	118	1357	1.357	2545	2.545	29	71.2	856_3	856
1150	19.1667	4.9	117	1319	1.319	2451	2.451	28	67.3	856_3	856
1153	19.2167	4.9	116	1258	1.258	2273	2.273	27	60	856_3	856
1155	19.25	4.9	115	1324	1.324	2441	2.441	27	66	856_3	856
1158	19.3	4.9	114	1257	1.257	2305	2.305	26	61.5	856_3	856
1160	19.3333	4.9	114	1274	1.274	2311	2.311	26	61.4	856_3	856
1163	19.3833	4.9	113	1309	1.309	2396	2.396	26	64.7	856_3	856
1165	19.4167	4.9	112	1288	1.288	2325	2.325	27	63.1	856_3	856
1168	19.4667	4.9	112	1271	1.271	2336	2.336	25	64	856_3	856
1169	19.4833	4.9	111	1283	1.283	2366	2.366	26	65.7	856_3	856
1172	19.5333	4.9	109	1289	1.289	2373	2.373	25	65.3	856_3	856
1174	19.5667	4.9	108	1308	1.308	2432	2.432	23	67.5	856_3	856
1176	19.6	4.9	108	1270	1.27	2353	2.353	25	66.8	856_3	856
1179	19.65	4.9	107	1238	1.238	2298	2.298	24	65.6	856_3	856
1181	19.6833	4.9	106	1205	1.205	2236	2.236	24	64.2	856_3	856
1184	19.7333	4.9	106	1195	1.195	2173	2.173	27	62.5	856_3	856
1186	19.7667	4.9	105	1178	1.178	2166	2.166	24	62.4	856_3	856
1188	19.8	4.9	104	1135	1.135	2044	2.044	26	58.5	856_3	856
1191	19.85	4.9	103	1134	1.134	2043	2.043	26	58.5	856_3	856
1194	19.9	4.9	103	1120	1.12	2004	2.004	26	57.1	856_3	856
1197	19.95	4.9	103	1151	1.151	1986	1.986	24	54.3	856_3	856
1199	19.9833	4.9	103	1171	1.171	2024	2.024	22	54.8	856_3	856
1201	20.0167	4.9	103	1188	1.188	1992	1.992	24	53.9	856_3	856
1205	20.0833	4.9	103	1192	1.192	2013	2.013	21	53.6	856_3	856
1206	20.1	4.9	103	1201	1.201	2023	2.023	21	54.4	856_3	856
1208	20.1333	4.9	103	1172	1.172	1944	1.944	23	52.7	856_3	856
1211	20.1833	4.9	103	1172	1.172	1944	1.944	23	52.7	856_3	856
1212	20.2	4.9	102	1141	1.141	1889	1.889	27	53.3	856_3	856
1214	20.2333	4.9	102	1141	1.141	1889	1.889	27	53.3	856_3	856
1217	20.2833	4.9	101	1137	1.137	1871	1.871	28	53.8	856_3	856
1219	20.3167	4.9	101	1128	1.128	1809	1.809	34	54.9	856_3	856
1221	20.35	4.9	101	1113	1.113	1782	1.782	33	53.7	856_3	856
1223	20.3833	4.9	101	1118	1.118	1780	1.78	33	53.9	856_3	856
1226	20.4333	4.9	100	1129	1.129	1833	1.833	29	54.3	856_3	856
1229	20.4833	4.9	100	1059	1.059	1759	1.759	28	51.8	856_3	856
1230	20.5	4.9	100	1069	1.069	1749	1.749	28	50.4	856_3	856
1234	20.5667	4.9	100	1067	1.067	1688	1.688	26	47.4	856_3	856
1237	20.6167	4.9	100	1085	1.085	1686	1.686	25	45.7	856_3	856
1239	20.65	4.9	99	1151	1.151	1733	1.733	25	46.7	856_3	856
1242	20.7	4.9	99	1072	1.072	1594	1.594	23	42.1	856_3	856
1244	20.7333	4.9	99	1082	1.082	1604	1.604	22	41.9	856_3	856
1247	20.7833	4.9	99	1173	1.173	1729	1.729	25	45.5	856_3	856
1248	20.8	4.9	98	1152	1.152	1705	1.705	24	45	856_3	856
1251	20.85	4.9	98	1161	1.161	1712	1.712	27	46	856_3	856
1254	20.9	4.9	98	1129	1.129	1688	1.688	26	45.7	856_3	856
1258	20.9667	4.9	97	1100	1.1	1702	1.702	23	46.3	856_3	856
1260	21	4.9	97	1141	1.141	1775	1.775	24	49.1	856_3	856
1263	21.05	4.9	97	1100	1.1	1739	1.739	23	48.5	856_3	856
1267	21.1167	4.9	97	1045	1.045	1635	1.635	20	43.8	856_3	856
1268	21.1333	4.9	97	1034	1.034	1619	1.619	20	43.5	856_3	856
1272	21.2	4.9	97	1017	1.017	1587	1.587	19	43.1	856_3	856
1273	21.2167	4.9	97	951	0.951	1487	1.487	19	40.4	856_3	856
1276	21.2667	4.9	98	949	0.949	1432	1.432	20	39.2	856_3	856
1280	21.3333	4.9	98	949	0.949	1432	1.432	20	39.2	856_3	856
1283	21.3833	4.9	98	1014	1.014	1481	1.481	20	39.5	856_3	856
1285	21.4167	4.9	98	1053	1.053	1527	1.527	19	42.3	856_3	856
1288	21.4667	4.9	98	1067	1.067	1534	1.534	18	42.3	856_3	856
1291	21.5167	4.9	98	1097	1.097	1555	1.555	19	43.4	856_3	856
1295	21.5833	4.9	98	1097	1.097	1555	1.555	19	43.4	856_3	856
1296	21.6	4.9	97	1096	1.096	1552	1.552	21	43.5	856_3	856
1299	21.65	4.9	96	1067	1.067	1470	1.47	23	40.1	856_3	856
1303	21.7167	4.9	96	1080	1.08	1509	1.509	22	41.3	856_3	856
1306	21.7667	4.9	96	1080	1.08	1510	1.51	22	41.3	856_3	856
1308	21.8	4.9	96	1078	1.078	1509	1.509	22	41.5	856_3	856
1311	21.85	4.9	96	1053	1.053	1449	1.449	22	37.9	856_3	856
1313	21.8833	4.9	97	1093	1.093	1517	1.517	23	40.5	856_3	856
1316	21.9333	4.9	97	1123	1.123	1553	1.553	22	41.2	856_3	856
1319	21.9833	4.9	97	1153	1.153	1626	1.626	22	44.9	856_3	856
1321	22.0167	4.9	96	1161	1.161	1650	1.65	24	47.2	856_3	856
1323	22.05	4.9	96	1128	1.128	1568	1.568	24	43.1	856_3	856
1326	22.1	4.9	95	1156	1.156	1629	1.629	23	45.2	856_3	856
1329	22.15	4.9	95	1154	1.154	1655	1.655	23	47.4	856_3	856
1331	22.1833	4.9	95	1137	1.137	1658	1.658	23	47.5	856_3	856
1333	22.2167	4.9	95	1095	1.095	1608	1.608	23	46.1	856_3	856
1336	22.2667	4.9	95	1055	1.055	1535	1.535	25	43.8	856_3	856
1338	22.3	4.9	95	1037	1.037	1504	1.504	25	42.4	856_3	856
1341	22.35	4.9	95	1090	1.09	1615	1.615	23	46.7	856_3	856
1343	22.3833	4.9	95	1038	1.038	1506	1.506	26	42.9	856_3	856
1345	22.4167	4.9	95	1024	1.024	1479	1.479	27	42	856_3	856
1347	22.45	4.9	94	1000	1	1426	1.426	29	40.8	856_3	856
1350	22.5	4.9	94	1019	1.019	1474	1.474	28	43.8	856_3	856
1351	22.5167	4.9	94	1005	1.005	1455	1.455	27	42.8	856_3	856
1353	22.55	4.9	94	989	0.989	1441	1.441	30	43.4	856_3	856
