# Supplementary material for: On the development of diagnostic support algorithms based on CPET biosignals data via machine learning and wavelets
Source: PeerJ journal article supplement (doi:10.7717/peerj-cs.2474), 2025-01-30
Supplement: raw_data.zip [file Subject_43.xlsx]

## Sheet: Folha1
time	time	Speed	HR	VO2	VO2	VCO2	VCO2	RR	VE	ID_test	ID
	min	km/h	/min	ml/min	L/min	ml/min	L/min	/min	L/min
0	0	5	66	551	0.551	469	0.469	27	19.5	390_1	390
3	0.05	5	68	737	0.737	631	0.631	25	24.1	390_1	390
5	0.0833333	5	73	610	0.61	518	0.518	28	21.4	390_1	390
7	0.116667	5	78	677	0.677	577	0.577	26	22.8	390_1	390
10	0.166667	5	81	744	0.744	626	0.626	26	24.1	390_1	390
13	0.216667	5	85	797	0.797	666	0.666	24	25	390_1	390
15	0.25	5	87	796	0.796	664	0.664	25	25.5	390_1	390
19	0.316667	5	89	796	0.796	665	0.665	25	25.5	390_1	390
22	0.366667	5	90	841	0.841	691	0.691	25	26.5	390_1	390
24	0.4	5	91	823	0.823	669	0.669	22	25.3	390_1	390
27	0.45	5	92	818	0.818	635	0.635	20	23.8	390_1	390
32	0.533333	5	92	826	0.826	640	0.64	20	24.1	390_1	390
34	0.566667	5	92	853	0.853	639	0.639	22	24.2	390_1	390
36	0.6	5	92	912	0.912	663	0.663	22	24.7	390_1	390
37	0.616667	5	92	1041	1.041	730	0.73	26	27.3	390_1	390
39	0.65	5	92	1113	1.113	745	0.745	28	27.4	390_1	390
41	0.683333	5	92	1226	1.226	819	0.819	32	30.3	390_1	390
43	0.716667	5	92	1226	1.226	819	0.819	32	30.3	390_1	390
46	0.766667	5	93	1226	1.226	819	0.819	32	30.3	390_1	390
48	0.8	5	93	1290	1.29	839	0.839	30	30.1	390_1	390
50	0.833333	5	94	1341	1.341	857	0.857	30	30.4	390_1	390
53	0.883333	5	94	1413	1.413	895	0.895	28	31.2	390_1	390
56	0.933333	5	95	1397	1.397	874	0.874	28	30.6	390_1	390
58	0.966667	5	95	1490	1.49	937	0.937	27	32.3	390_1	390
60	1	5	95	1592	1.592	999	0.999	27	33.7	390_1	390
62	1.03333	5	95	1632	1.632	1023	1.023	28	34.5	390_1	390
64	1.06667	5	95	1670	1.67	1043	1.043	29	35	390_1	390
66	1.1	5	94	1726	1.726	1079	1.079	29	35.8	390_1	390
67	1.11667	5	94	1763	1.763	1105	1.105	30	36.7	390_1	390
68	1.13333	5	94	1763	1.763	1105	1.105	30	36.7	390_1	390
71	1.18333	5	94	1854	1.854	1196	1.196	28	39.8	390_1	390
73	1.21667	5	94	1865	1.865	1224	1.224	27	40.7	390_1	390
76	1.26667	5	94	1881	1.881	1259	1.259	26	41.7	390_1	390
78	1.3	5	95	1842	1.842	1251	1.251	26	41.5	390_1	390
80	1.33333	5	95	1807	1.807	1239	1.239	26	41.1	390_1	390
82	1.36667	5	95	1689	1.689	1164	1.164	29	38.9	390_1	390
84	1.4	5	96	1713	1.713	1182	1.182	29	39.4	390_1	390
86	1.43333	5	96	1666	1.666	1150	1.15	30	38.5	390_1	390
87	1.45	5	95	1626	1.626	1126	1.126	31	38	390_1	390
89	1.48333	5	95	1602	1.602	1107	1.107	31	37.6	390_1	390
91	1.51667	5	94	1600	1.6	1109	1.109	32	37.6	390_1	390
93	1.55	5	94	1597	1.597	1112	1.112	31	37.6	390_1	390
95	1.58333	5	94	1591	1.591	1112	1.112	31	37.6	390_1	390
97	1.61667	5	94	1566	1.566	1095	1.095	31	37.2	390_1	390
99	1.65	5	94	1559	1.559	1091	1.091	31	37.2	390_1	390
101	1.68333	5	94	1559	1.559	1091	1.091	31	37.2	390_1	390
103	1.71667	5	94	1592	1.592	1117	1.117	30	37.7	390_1	390
108	1.8	5	94	1615	1.615	1139	1.139	29	38.2	390_1	390
110	1.83333	5	94	1596	1.596	1142	1.142	29	38.3	390_1	390
113	1.88333	5	95	1599	1.599	1162	1.162	29	38.5	390_1	390
114	1.9	5	95	1599	1.599	1162	1.162	29	38.5	390_1	390
116	1.93333	5	95	1589	1.589	1159	1.159	29	38.1	390_1	390
118	1.96667	5	94	1538	1.538	1130	1.13	30	37.2	390_1	390
120	2	5	94	1491	1.491	1094	1.094	30	36	390_1	390
121	2.01667	5	93	1458	1.458	1052	1.052	32	34.9	390_1	390
125	2.08333	5	93	1319	1.319	909	0.909	26	29.5	390_1	390
127	2.11667	5	93	1317	1.317	908	0.908	26	29.5	390_1	390
130	2.16667	5	93	1405	1.405	939	0.939	26	30	390_1	390
132	2.2	5	92	1521	1.521	1006	1.006	24	32	390_1	390
134	2.23333	5	92	1581	1.581	1054	1.054	24	33.7	390_1	390
136	2.26667	5	92	1620	1.62	1094	1.094	24	35.2	390_1	390
138	2.3	5	92	1811	1.811	1261	1.261	28	41.7	390_1	390
140	2.33333	5	91	1821	1.821	1276	1.276	27	41.9	390_1	390
142	2.36667	5	91	1759	1.759	1271	1.271	28	42.7	390_1	390
144	2.4	5	90	1628	1.628	1221	1.221	30	41.8	390_1	390
146	2.43333	5	90	1543	1.543	1169	1.169	30	40.1	390_1	390
147	2.45	5	90	1500	1.5	1125	1.125	32	38.8	390_1	390
149	2.48333	5	90	1479	1.479	1105	1.105	32	37.8	390_1	390
151	2.51667	5	90	1468	1.468	1090	1.09	32	36.9	390_1	390
153	2.55	5	89	1467	1.467	1090	1.09	32	36.9	390_1	390
155	2.58333	5	88	1463	1.463	1072	1.072	33	36.5	390_1	390
157	2.61667	5	87	1499	1.499	1092	1.092	32	36.8	390_1	390
159	2.65	5	86	1499	1.499	1092	1.092	32	36.8	390_1	390
162	2.7	5	86	1390	1.39	1007	1.007	29	34.2	390_1	390
163	2.71667	5	85	1262	1.262	905	0.905	28	30.9	390_1	390
165	2.75	5	85	1287	1.287	921	0.921	27	31.4	390_1	390
167	2.78333	5	85	1277	1.277	894	0.894	26	30.1	390_1	390
169	2.81667	5	86	1327	1.327	916	0.916	26	30.3	390_1	390
172	2.86667	5	87	1351	1.351	908	0.908	26	30.2	390_1	390
174	2.9	5	88	1423	1.423	957	0.957	27	31.3	390_1	390
176	2.93333	5	88	1624	1.624	1103	1.103	26	35.5	390_1	390
178	2.96667	5	89	1699	1.699	1168	1.168	27	37.8	390_1	390
180	3	5	90	1673	1.673	1178	1.178	26	38.2	390_1	390
182	3.03333	5	91	1698	1.698	1224	1.224	27	40	390_1	390
186	3.1	5	92	1701	1.701	1270	1.27	24	41.6	390_1	390
188	3.13333	5	92	1641	1.641	1255	1.255	26	41.6	390_1	390
190	3.16667	5	93	1642	1.642	1255	1.255	26	41.6	390_1	390
192	3.2	5	92	1584	1.584	1202	1.202	30	40.3	390_1	390
193	3.21667	5	92	1532	1.532	1169	1.169	30	39.1	390_1	390
195	3.25	5	91	1508	1.508	1150	1.15	30	38.1	390_1	390
197	3.28333	5	91	1483	1.483	1122	1.122	31	37.1	390_1	390
199	3.31667	5	91	1482	1.482	1102	1.102	32	36.3	390_1	390
201	3.35	5	90	1481	1.481	1101	1.101	32	36.3	390_1	390
203	3.38333	5	90	1524	1.524	1113	1.113	32	36.4	390_1	390
205	3.41667	5	91	1567	1.567	1135	1.135	31	37	390_1	390
207	3.45	5	91	1585	1.585	1159	1.159	31	38.1	390_1	390
209	3.48333	5	92	1600	1.6	1190	1.19	30	39.4	390_1	390
212	3.53333	5	92	1600	1.6	1188	1.188	30	39.3	390_1	390
213	3.55	5	93	1585	1.585	1190	1.19	31	39.4	390_1	390
215	3.58333	5	94	1560	1.56	1187	1.187	31	39.4	390_1	390
221	3.68333	5	94	1557	1.557	1228	1.228	23	40.5	390_1	390
223	3.71667	5	94	1552	1.552	1195	1.195	31	39.4	390_1	390
225	3.75	5	94	1556	1.556	1197	1.197	31	39	390_1	390
227	3.78333	5	93	1550	1.55	1186	1.186	30	38.3	390_1	390
229	3.81667	5	92	1558	1.558	1185	1.185	30	38.1	390_1	390
231	3.85	5	92	1559	1.559	1186	1.186	29	38.2	390_1	390
233	3.88333	5	91	1551	1.551	1174	1.174	29	37.8	390_1	390
234	3.9	5.1	91	1541	1.541	1159	1.159	30	37.6	390_1	390
236	3.93333	5.1	92	1522	1.522	1140	1.14	30	37.3	390_1	390
238	3.96667	5.1	92	1520	1.52	1144	1.144	30	37.3	390_1	390
241	4.01667	5.2	93	1522	1.522	1140	1.14	31	37.4	390_1	390
243	4.05	5.2	93	1535	1.535	1163	1.163	30	38.3	390_1	390
245	4.08333	5.2	93	1534	1.534	1173	1.173	30	38.7	390_1	390
246	4.1	5.3	93	1535	1.535	1173	1.173	30	38.7	390_1	390
248	4.13333	5.3	93	1475	1.475	1132	1.132	30	36.4	390_1	390
251	4.18333	5.3	93	1444	1.444	1092	1.092	28	34.1	390_1	390
253	4.21667	5.4	94	1454	1.454	1108	1.108	28	34.7	390_1	390
256	4.26667	5.4	94	1519	1.519	1132	1.132	28	34.9	390_1	390
258	4.3	5.5	94	1572	1.572	1175	1.175	27	36.3	390_1	390
260	4.33333	5.5	94	1575	1.575	1187	1.187	26	36.8	390_1	390
262	4.36667	5.5	95	1624	1.624	1238	1.238	26	39.5	390_1	390
264	4.4	5.6	95	1647	1.647	1290	1.29	27	42.2	390_1	390
267	4.45	5.6	95	1649	1.649	1291	1.291	27	42.2	390_1	390
269	4.48333	5.6	95	1600	1.6	1279	1.279	28	41.9	390_1	390
271	4.51667	5.7	95	1545	1.545	1235	1.235	29	40.3	390_1	390
273	4.55	5.7	96	1544	1.544	1235	1.235	29	40.3	390_1	390
275	4.58333	5.7	97	1553	1.553	1238	1.238	30	40.3	390_1	390
278	4.63333	5.8	98	1565	1.565	1245	1.245	28	39.9	390_1	390
280	4.66667	5.8	98	1608	1.608	1263	1.263	28	40.3	390_1	390
282	4.7	5.9	99	1614	1.614	1279	1.279	27	41.1	390_1	390
284	4.73333	5.9	99	1616	1.616	1281	1.281	29	41.4	390_1	390
286	4.76667	5.9	99	1621	1.621	1292	1.292	29	42	390_1	390
288	4.8	6	100	1614	1.614	1298	1.298	29	42.2	390_1	390
290	4.83333	6	100	1625	1.625	1312	1.312	30	42.3	390_1	390
292	4.86667	6	101	1647	1.647	1329	1.329	30	42.8	390_1	390
294	4.9	6.1	101	1632	1.632	1315	1.315	30	42.6	390_1	390
296	4.93333	6.1	101	1648	1.648	1322	1.322	31	42.7	390_1	390
298	4.96667	6.1	101	1652	1.652	1330	1.33	31	43.1	390_1	390
300	5	6.2	101	1655	1.655	1340	1.34	30	43.4	390_1	390
302	5.03333	6.2	101	1686	1.686	1373	1.373	29	44.2	390_1	390
304	5.06667	6.2	101	1686	1.686	1373	1.373	29	44.2	390_1	390
307	5.11667	6.3	101	1658	1.658	1356	1.356	28	43.5	390_1	390
309	5.15	6.3	101	1667	1.667	1363	1.363	27	43.1	390_1	390
311	5.18333	6.3	102	1643	1.643	1336	1.336	28	42.3	390_1	390
313	5.21667	6.4	102	1647	1.647	1329	1.329	28	41.9	390_1	390
315	5.25	6.4	104	1647	1.647	1317	1.317	28	41.2	390_1	390
317	5.28333	6.4	103	1646	1.646	1317	1.317	28	41.2	390_1	390
322	5.36667	6.5	104	1671	1.671	1324	1.324	29	41.4	390_1	390
325	5.41667	6.6	104	1671	1.671	1323	1.323	29	41.4	390_1	390
327	5.45	6.6	105	1680	1.68	1350	1.35	23	41.7	390_1	390
329	5.48333	6.6	105	1711	1.711	1376	1.376	23	42.2	390_1	390
331	5.51667	6.7	104	1749	1.749	1407	1.407	22	42.6	390_1	390
333	5.55	6.7	104	1791	1.791	1443	1.443	23	43.5	390_1	390
336	5.6	6.8	105	1828	1.828	1479	1.479	22	44.4	390_1	390
338	5.63333	6.8	105	1899	1.899	1526	1.526	28	46.4	390_1	390
340	5.66667	6.8	106	1901	1.901	1537	1.537	28	47.1	390_1	390
343	5.71667	6.9	107	1887	1.887	1547	1.547	26	47.1	390_1	390
346	5.76667	6.9	108	1884	1.884	1567	1.567	25	47.6	390_1	390
348	5.8	7	109	1888	1.888	1561	1.561	27	47.9	390_1	390
350	5.83333	7	110	1886	1.886	1568	1.568	26	48.1	390_1	390
353	5.88333	7	111	1876	1.876	1566	1.566	25	47.5	390_1	390
355	5.91667	7.1	111	1896	1.896	1584	1.584	24	47.7	390_1	390
357	5.95	7.1	112	1904	1.904	1587	1.587	24	47.5	390_1	390
360	6	7.2	112	1948	1.948	1613	1.613	25	47.9	390_1	390
362	6.03333	7.2	112	1990	1.99	1628	1.628	25	48.2	390_1	390
364	6.06667	7.2	112	2022	2.022	1654	1.654	25	48.6	390_1	390
367	6.11667	7.3	112	2032	2.032	1661	1.661	25	48.6	390_1	390
369	6.15	7.3	113	2033	2.033	1672	1.672	25	48.7	390_1	390
371	6.18333	7.3	114	2044	2.044	1683	1.683	26	49.3	390_1	390
373	6.21667	7.4	114	2105	2.105	1720	1.72	26	50.1	390_1	390
375	6.25	7.4	115	2138	2.138	1753	1.753	28	51.3	390_1	390
377	6.28333	7.4	116	2172	2.172	1776	1.776	29	52	390_1	390
380	6.33333	7.5	117	2184	2.184	1798	1.798	27	52.4	390_1	390
382	6.36667	7.5	118	2226	2.226	1831	1.831	28	53.6	390_1	390
384	6.4	7.6	119	2277	2.277	1886	1.886	31	55.7	390_1	390
387	6.45	7.6	121	2271	2.271	1910	1.91	28	56.1	390_1	390
391	6.51667	7.7	122	2314	2.314	1962	1.962	27	58	390_1	390
392	6.53333	7.7	123	2363	2.363	2027	2.027	24	60.3	390_1	390
394	6.56667	7.7	124	2431	2.431	2098	2.098	24	62.5	390_1	390
396	6.6	7.8	125	2520	2.52	2190	2.19	26	67	390_1	390
397	6.61667	7.8	125	2564	2.564	2256	2.256	29	70.2	390_1	390
399	6.65	7.8	126	2682	2.682	2362	2.362	30	74	390_1	390
401	6.68333	7.8	126	2758	2.758	2462	2.462	36	79	390_1	390
402	6.7	7.9	126	2761	2.761	2501	2.501	37	81.6	390_1	390
404	6.73333	7.9	127	2773	2.773	2532	2.532	37	82.5	390_1	390
405	6.75	7.9	127	2720	2.72	2513	2.513	38	83.1	390_1	390
407	6.78333	7.9	128	2749	2.749	2551	2.551	38	83.5	390_1	390
408	6.8	8	128	2742	2.742	2560	2.56	38	83.6	390_1	390
410	6.83333	8	129	2714	2.714	2522	2.522	38	83.1	390_1	390
411	6.85	8	129	2730	2.73	2542	2.542	39	83.6	390_1	390
413	6.88333	8	130	2699	2.699	2520	2.52	38	82.6	390_1	390
415	6.91667	8.1	130	2698	2.698	2491	2.491	38	80.9	390_1	390
416	6.93333	8.1	130	2727	2.727	2498	2.498	38	79.7	390_1	390
418	6.96667	8.1	130	2731	2.731	2481	2.481	36	78	390_1	390
420	7	8.2	130	2755	2.755	2475	2.475	36	77.3	390_1	390
422	7.03333	8.2	130	2774	2.774	2470	2.47	35	76.4	390_1	390
423	7.05	8.2	130	2774	2.774	2470	2.47	35	76.4	390_1	390
425	7.08333	8.2	131	2808	2.808	2496	2.496	36	77.9	390_1	390
426	7.1	8.3	131	2831	2.831	2536	2.536	36	80.2	390_1	390
428	7.13333	8.3	131	2839	2.839	2570	2.57	36	82.4	390_1	390
430	7.16667	8.3	131	2856	2.856	2611	2.611	38	85.1	390_1	390
431	7.18333	8.3	132	2856	2.856	2640	2.64	38	87.1	390_1	390
433	7.21667	8.4	132	2849	2.849	2667	2.667	38	88.3	390_1	390
434	7.23333	8.4	133	2850	2.85	2667	2.667	38	88.3	390_1	390
436	7.26667	8.4	133	2850	2.85	2667	2.667	38	88.3	390_1	390
437	7.28333	8.4	133	2861	2.861	2690	2.69	39	89.2	390_1	390
439	7.31667	8.5	134	2850	2.85	2682	2.682	39	89.1	390_1	390
441	7.35	8.5	134	2784	2.784	2629	2.629	39	87.2	390_1	390
444	7.4	8.6	134	2850	2.85	2648	2.648	33	84.3	390_1	390
445	7.41667	8.6	134	2887	2.887	2647	2.647	33	83.4	390_1	390
447	7.45	8.6	134	2914	2.914	2670	2.67	32	84.2	390_1	390
448	7.46667	8.6	133	2877	2.877	2616	2.616	34	82.1	390_1	390
449	7.48333	8.6	133	2902	2.902	2605	2.605	35	81.6	390_1	390
451	7.51667	8.7	133	3005	3.005	2678	2.678	35	84	390_1	390
452	7.53333	8.7	133	3064	3.064	2737	2.737	34	86.2	390_1	390
454	7.56667	8.7	133	3059	3.059	2756	2.756	40	90.4	390_1	390
456	7.6	8.8	133	3041	3.041	2775	2.775	41	92.4	390_1	390
457	7.61667	8.8	133	2991	2.991	2773	2.773	39	92.8	390_1	390
458	7.63333	8.8	133	3001	3.001	2776	2.776	39	92.8	390_1	390
460	7.66667	8.8	133	2970	2.97	2765	2.765	40	93.3	390_1	390
461	7.68333	8.8	134	2923	2.923	2751	2.751	41	93.4	390_1	390
463	7.71667	8.9	134	2895	2.895	2748	2.748	40	92.9	390_1	390
464	7.73333	8.9	135	2880	2.88	2753	2.753	41	93.5	390_1	390
466	7.76667	8.9	136	2873	2.873	2748	2.748	42	93.8	390_1	390
467	7.78333	8.9	136	2886	2.886	2760	2.76	42	94.3	390_1	390
469	7.81667	9	137	2893	2.893	2769	2.769	41	94.9	390_1	390
470	7.83333	9	137	2865	2.865	2756	2.756	40	93.9	390_1	390
471	7.85	9	137	2899	2.899	2768	2.768	41	94	390_1	390
473	7.88333	9	138	2937	2.937	2793	2.793	41	94.8	390_1	390
474	7.9	9.1	138	2948	2.948	2804	2.804	41	95.1	390_1	390
476	7.93333	9.1	139	2954	2.954	2802	2.802	40	94.9	390_1	390
477	7.95	9.1	140	2999	2.999	2835	2.835	40	95.7	390_1	390
479	7.98333	9.1	140	3027	3.027	2864	2.864	41	96.5	390_1	390
480	8	9.2	140	3022	3.022	2871	2.871	40	97	390_1	390
482	8.03333	9.2	141	3051	3.051	2903	2.903	40	98.2	390_1	390
483	8.05	9.2	141	3072	3.072	2912	2.912	41	98.9	390_1	390
485	8.08333	9.2	141	3034	3.034	2888	2.888	41	98.3	390_1	390
486	8.1	9.3	141	3065	3.065	2904	2.904	41	98.2	390_1	390
488	8.13333	9.3	141	3084	3.084	2908	2.908	40	98.1	390_1	390
489	8.15	9.3	141	3098	3.098	2914	2.914	40	98.2	390_1	390
491	8.18333	9.3	141	3132	3.132	2932	2.932	40	99.1	390_1	390
492	8.2	9.4	141	3132	3.132	2932	2.932	40	99.1	390_1	390
494	8.23333	9.4	141	3133	3.133	2947	2.947	40	99.8	390_1	390
496	8.26667	9.4	141	3133	3.133	2947	2.947	40	99.8	390_1	390
497	8.28333	9.4	141	3039	3.039	2848	2.848	41	96.7	390_1	390
499	8.31667	9.5	141	2896	2.896	2665	2.665	39	87.7	390_1	390
501	8.35	9.5	141	2870	2.87	2584	2.584	38	81.2	390_1	390
503	8.38333	9.5	141	2979	2.979	2651	2.651	34	80.9	390_1	390
505	8.41667	9.6	141	2978	2.978	2650	2.65	34	80.9	390_1	390
506	8.43333	9.6	141	3065	3.065	2692	2.692	34	81.3	390_1	390
508	8.46667	9.6	140	3215	3.215	2862	2.862	35	90	390_1	390
509	8.48333	9.7	140	3294	3.294	2943	2.943	34	93.6	390_1	390
511	8.51667	9.7	140	3340	3.34	3026	3.026	35	100.1	390_1	390
512	8.53333	9.7	140	3342	3.342	3027	3.027	35	100.1	390_1	390
514	8.56667	9.7	141	3257	3.257	3000	3	39	102.4	390_1	390
515	8.58333	9.8	141	3176	3.176	2950	2.95	40	101.2	390_1	390
517	8.61667	9.8	141	3144	3.144	2932	2.932	40	100.5	390_1	390
518	8.63333	9.8	141	3136	3.136	2930	2.93	39	99	390_1	390
520	8.66667	9.8	141	3147	3.147	2946	2.946	40	99.7	390_1	390
521	8.68333	9.8	141	3149	3.149	2956	2.956	40	99.8	390_1	390
523	8.71667	9.9	141	3175	3.175	2976	2.976	40	100.8	390_1	390
524	8.73333	9.9	142	3188	3.188	2985	2.985	41	102.2	390_1	390
526	8.76667	9.9	142	3181	3.181	2984	2.984	41	102	390_1	390
527	8.78333	9.9	142	3179	3.179	2990	2.99	41	101.6	390_1	390
529	8.81667	10	142	3196	3.196	3012	3.012	40	102.2	390_1	390
530	8.83333	10	143	3196	3.196	3023	3.023	40	102	390_1	390
532	8.86667	10	143	3210	3.21	3038	3.038	40	102.5	390_1	390
533	8.88333	10	144	3194	3.194	3028	3.028	39	102.5	390_1	390
535	8.91667	10.1	145	3203	3.203	3045	3.045	39	102.6	390_1	390
536	8.93333	10.1	145	3216	3.216	3057	3.057	39	103.4	390_1	390
538	8.96667	10.1	145	3222	3.222	3072	3.072	40	104.4	390_1	390
539	8.98333	10.1	145	3226	3.226	3083	3.083	40	104.9	390_1	390
541	9.01667	10.2	146	3223	3.223	3086	3.086	40	105.4	390_1	390
542	9.03333	10.2	146	3224	3.224	3100	3.1	40	105.9	390_1	390
544	9.06667	10.2	146	3234	3.234	3100	3.1	40	106	390_1	390
545	9.08333	10.3	146	3242	3.242	3108	3.108	40	105.8	390_1	390
547	9.11667	10.3	147	3228	3.228	3110	3.11	40	106	390_1	390
548	9.13333	10.3	147	3237	3.237	3108	3.108	40	105.7	390_1	390
550	9.16667	10.3	148	3258	3.258	3118	3.118	40	105.7	390_1	390
551	9.18333	10.4	148	3266	3.266	3126	3.126	40	106.2	390_1	390
553	9.21667	10.4	148	3252	3.252	3122	3.122	40	106.2	390_1	390
554	9.23333	10.4	148	3242	3.242	3109	3.109	40	105.1	390_1	390
556	9.26667	10.4	148	3249	3.249	3125	3.125	40	105.8	390_1	390
557	9.28333	10.5	148	3217	3.217	3102	3.102	40	105.2	390_1	390
558	9.3	10.5	148	3166	3.166	3048	3.048	40	102.5	390_1	390
560	9.33333	10.5	148	3177	3.177	3058	3.058	40	102.9	390_1	390
562	9.36667	10.5	148	3160	3.16	2994	2.994	37	99.1	390_1	390
564	9.4	10.6	148	3229	3.229	3021	3.021	37	99.1	390_1	390
565	9.41667	10.6	148	3317	3.317	3070	3.07	36	100.5	390_1	390
567	9.45	10.6	147	3373	3.373	3088	3.088	36	99.8	390_1	390
568	9.46667	10.6	147	3457	3.457	3157	3.157	37	103.1	390_1	390
570	9.5	10.7	147	3531	3.531	3244	3.244	40	107.8	390_1	390
571	9.51667	10.7	148	3489	3.489	3232	3.232	40	109.4	390_1	390
573	9.55	10.7	148	3491	3.491	3233	3.233	40	109.4	390_1	390
574	9.56667	10.7	148	3462	3.462	3230	3.23	40	110.9	390_1	390
575	9.58333	10.8	148	3431	3.431	3220	3.22	41	111.6	390_1	390
577	9.61667	10.8	148	3397	3.397	3208	3.208	40	111.6	390_1	390
578	9.63333	10.8	148	3369	3.369	3202	3.202	40	110.6	390_1	390
580	9.66667	10.8	149	3311	3.311	3158	3.158	41	108.1	390_1	390
581	9.68333	10.9	149	3310	3.31	3157	3.157	41	108.1	390_1	390
583	9.71667	10.9	150	3337	3.337	3188	3.188	41	107.6	390_1	390
584	9.73333	10.9	150	3350	3.35	3190	3.19	41	106.9	390_1	390
586	9.76667	10.9	150	3387	3.387	3216	3.216	41	107.4	390_1	390
587	9.78333	11	151	3419	3.419	3244	3.244	41	108.1	390_1	390
589	9.81667	11	151	3467	3.467	3295	3.295	41	110.6	390_1	390
590	9.83333	11	151	3483	3.483	3311	3.311	40	111.5	390_1	390
592	9.86667	11	151	3470	3.47	3307	3.307	40	111.3	390_1	390
593	9.88333	11.1	151	3455	3.455	3307	3.307	40	112.2	390_1	390
595	9.91667	11.1	151	3441	3.441	3310	3.31	40	112.5	390_1	390
596	9.93333	11.1	151	3424	3.424	3311	3.311	40	112	390_1	390
598	9.96667	11.1	151	3418	3.418	3312	3.312	40	112.4	390_1	390
599	9.98333	11.2	151	3428	3.428	3337	3.337	40	113.1	390_1	390
601	10.0167	11.2	151	3426	3.426	3337	3.337	40	113	390_1	390
602	10.0333	11.2	151	3408	3.408	3329	3.329	41	112.1	390_1	390
604	10.0667	11.2	152	3414	3.414	3344	3.344	41	112.5	390_1	390
605	10.0833	11.3	152	3444	3.444	3360	3.36	40	113.3	390_1	390
607	10.1167	11.3	153	3463	3.463	3377	3.377	41	114.1	390_1	390
608	10.1333	11.3	153	3469	3.469	3395	3.395	41	114.7	390_1	390
610	10.1667	11.3	153	3463	3.463	3394	3.394	41	115.3	390_1	390
611	10.1833	11.3	153	3440	3.44	3378	3.378	42	115.4	390_1	390
612	10.2	11.4	153	3440	3.44	3377	3.377	42	115.4	390_1	390
614	10.2333	11.4	153	3426	3.426	3389	3.389	42	114.9	390_1	390
615	10.25	11.4	153	3417	3.417	3389	3.389	42	114	390_1	390
617	10.2833	11.4	153	3426	3.426	3388	3.388	42	113.3	390_1	390
618	10.3	11.5	153	3444	3.444	3401	3.401	42	112.7	390_1	390
620	10.3333	11.5	153	3443	3.443	3401	3.401	42	112.7	390_1	390
621	10.35	11.5	153	3474	3.474	3433	3.433	41	113.2	390_1	390
623	10.3833	11.5	154	3493	3.493	3457	3.457	40	114.6	390_1	390
624	10.4	11.6	154	3527	3.527	3468	3.468	41	116.1	390_1	390
626	10.4333	11.6	154	3528	3.528	3469	3.469	41	116.1	390_1	390
627	10.45	11.6	154	3554	3.554	3497	3.497	41	117.7	390_1	390
629	10.4833	11.6	154	3537	3.537	3486	3.486	41	118.6	390_1	390
630	10.5	11.7	155	3535	3.535	3482	3.482	41	119.3	390_1	390
632	10.5333	11.7	155	3556	3.556	3500	3.5	41	120.8	390_1	390
633	10.55	11.7	156	3540	3.54	3509	3.509	41	121.5	390_1	390
635	10.5833	11.7	156	3530	3.53	3511	3.511	41	121.8	390_1	390
636	10.6	11.8	156	3551	3.551	3530	3.53	41	122.2	390_1	390
637	10.6167	11.8	156	3550	3.55	3525	3.525	41	121.7	390_1	390
639	10.65	11.8	156	3548	3.548	3542	3.542	41	122.2	390_1	390
640	10.6667	11.8	152	3548	3.548	3542	3.542	41	122.2	390_1	390
642	10.7	11.9	152	3521	3.521	3528	3.528	41	122.1	390_1	390
643	10.7167	11.9	152	3508	3.508	3521	3.521	41	121.8	390_1	390
645	10.75	11.9	153	3505	3.505	3529	3.529	41	121.7	390_1	390
646	10.7667	11.9	153	3503	3.503	3541	3.541	41	121.6	390_1	390
648	10.8	12	153	3491	3.491	3526	3.526	41	120.9	390_1	390
649	10.8167	12	157	3477	3.477	3514	3.514	41	120.7	390_1	390
651	10.85	12	157	3473	3.473	3515	3.515	41	120.6	390_1	390
652	10.8667	12	157	3497	3.497	3540	3.54	41	120.4	390_1	390
653	10.8833	12.1	157	3500	3.5	3546	3.546	41	120.2	390_1	390
655	10.9167	12.1	157	3492	3.492	3537	3.537	41	120.2	390_1	390
656	10.9333	12.1	157	3492	3.492	3536	3.536	41	119.8	390_1	390
658	10.9667	12.1	157	3519	3.519	3564	3.564	41	119.6	390_1	390
659	10.9833	12.2	158	3536	3.536	3581	3.581	42	119.7	390_1	390
661	11.0167	12.2	158	3545	3.545	3592	3.592	41	119.7	390_1	390
662	11.0333	12.2	158	3528	3.528	3567	3.567	41	120	390_1	390
664	11.0667	12.2	158	3522	3.522	3567	3.567	41	120.3	390_1	390
665	11.0833	12.2	158	3524	3.524	3581	3.581	41	120.7	390_1	390
666	11.1	12.3	158	3529	3.529	3597	3.597	41	121.1	390_1	390
668	11.1333	12.3	158	3524	3.524	3594	3.594	41	121.2	390_1	390
669	11.15	12.3	158	3524	3.524	3594	3.594	41	121.2	390_1	390
671	11.1833	12.3	159	3537	3.537	3614	3.614	41	121	390_1	390
672	11.2	12.4	159	3546	3.546	3622	3.622	41	121	390_1	390
674	11.2333	12.4	159	3558	3.558	3646	3.646	41	121.4	390_1	390
675	11.25	12.4	159	3558	3.558	3636	3.636	41	121	390_1	390
677	11.2833	12.4	159	3558	3.558	3625	3.625	41	120.3	390_1	390
678	11.3	12.5	159	3555	3.555	3612	3.612	41	118.5	390_1	390
680	11.3333	12.5	159	3554	3.554	3611	3.611	41	118.5	390_1	390
681	11.35	12.5	158	3600	3.6	3648	3.648	41	119.1	390_1	390
683	11.3833	12.5	158	3625	3.625	3657	3.657	40	117.3	390_1	390
684	11.4	12.6	158	3647	3.647	3668	3.668	40	117.6	390_1	390
686	11.4333	12.6	158	3674	3.674	3704	3.704	40	119.3	390_1	390
687	11.45	12.6	158	3700	3.7	3748	3.748	40	121.8	390_1	390
688	11.4667	12.6	158	3695	3.695	3775	3.775	42	124.1	390_1	390
690	11.5	12.7	158	3676	3.676	3760	3.76	42	123.2	390_1	390
691	11.5167	12.7	159	3625	3.625	3737	3.737	42	123.2	390_1	390
693	11.55	12.7	159	3626	3.626	3744	3.744	42	123.4	390_1	390
694	11.5667	12.7	159	3585	3.585	3722	3.722	42	123.2	390_1	390
696	11.6	12.8	159	3551	3.551	3702	3.702	42	122.7	390_1	390
697	11.6167	12.8	159	3542	3.542	3702	3.702	41	123	390_1	390
699	11.65	12.8	159	3533	3.533	3695	3.695	42	123.2	390_1	390
700	11.6667	12.8	159	3512	3.512	3687	3.687	42	123.4	390_1	390
701	11.6833	12.9	159	3520	3.52	3705	3.705	42	123.6	390_1	390
703	11.7167	12.9	159	3537	3.537	3718	3.718	42	123.5	390_1	390
704	11.7333	12.9	159	3555	3.555	3740	3.74	42	123.8	390_1	390
706	11.7667	12.9	159	3586	3.586	3765	3.765	43	124.2	390_1	390
707	11.7833	12.9	159	3580	3.58	3757	3.757	43	123.9	390_1	390
708	11.8	13	160	3588	3.588	3768	3.768	43	123.5	390_1	390
710	11.8333	13	160	3600	3.6	3787	3.787	43	124.1	390_1	390
711	11.85	13	160	3596	3.596	3788	3.788	43	124.3	390_1	390
713	11.8833	13	160	3587	3.587	3785	3.785	43	124.5	390_1	390
714	11.9	13.1	161	3582	3.582	3789	3.789	43	124.7	390_1	390
715	11.9167	13.1	161	3576	3.576	3782	3.782	43	124.4	390_1	390
717	11.95	13.1	161	3586	3.586	3771	3.771	43	124.2	390_1	390
718	11.9667	13.1	161	3586	3.586	3771	3.771	43	124.2	390_1	390
719	11.9833	13.2	161	3581	3.581	3761	3.761	43	123.4	390_1	390
721	12.0167	13.2	161	3592	3.592	3771	3.771	43	123.1	390_1	390
722	12.0333	13.2	161	3605	3.605	3782	3.782	43	123.1	390_1	390
724	12.0667	13.2	161	3592	3.592	3773	3.773	43	122.8	390_1	390
725	12.0833	13.2	161	3586	3.586	3766	3.766	43	122.1	390_1	390
726	12.1	13.3	161	3565	3.565	3776	3.776	44	122.5	390_1	390
728	12.1333	13.3	161	3546	3.546	3775	3.775	44	122.9	390_1	390
729	12.15	13.3	161	3519	3.519	3765	3.765	44	122.7	390_1	390
730	12.1667	13.3	161	3493	3.493	3756	3.756	44	122.7	390_1	390
732	12.2	13.4	161	3486	3.486	3749	3.749	44	122.4	390_1	390
733	12.2167	13.4	161	3492	3.492	3750	3.75	44	122	390_1	390
734	12.2333	13.4	161	3500	3.5	3754	3.754	44	122.4	390_1	390
736	12.2667	13.4	157	3506	3.506	3753	3.753	44	121.8	390_1	390
737	12.2833	13.5	153	3535	3.535	3782	3.782	44	122.5	390_1	390
738	12.3	13.5	153	3549	3.549	3797	3.797	44	123.5	390_1	390
740	12.3333	13.5	153	3555	3.555	3794	3.794	44	122.9	390_1	390
741	12.35	13.5	153	3552	3.552	3790	3.79	44	123	390_1	390
742	12.3667	13.5	153	3550	3.55	3786	3.786	44	122.2	390_1	390
744	12.4	13.6	156	3508	3.508	3738	3.738	45	121.1	390_1	390
745	12.4167	13.6	160	3489	3.489	3717	3.717	45	120.8	390_1	390
746	12.4333	13.6	161	3455	3.455	3691	3.691	46	119.8	390_1	390
747	12.45	5	161	3446	3.446	3695	3.695	47	119.7	390_1	390
749	12.4833	5	160	3446	3.446	3695	3.695	47	119.7	390_1	390
750	12.5	5	159	3446	3.446	3706	3.706	48	120.7	390_1	390
751	12.5167	5	159	3475	3.475	3742	3.742	46	120.3	390_1	390
753	12.55	5	159	3486	3.486	3767	3.767	48	122	390_1	390
754	12.5667	5	158	3523	3.523	3819	3.819	48	121.9	390_1	390
755	12.5833	5	158	3561	3.561	3853	3.853	47	121.2	390_1	390
757	12.6167	5	157	3580	3.58	3871	3.871	47	121.7	390_1	390
758	12.6333	5	157	3577	3.577	3880	3.88	46	121.2	390_1	390
759	12.65	5	156	3569	3.569	3871	3.871	45	120.6	390_1	390
761	12.6833	5	156	3568	3.568	3871	3.871	45	120.6	390_1	390
762	12.7	5	155	3571	3.571	3883	3.883	44	119.3	390_1	390
764	12.7333	5	154	3554	3.554	3878	3.878	43	119	390_1	390
765	12.75	5	154	3530	3.53	3866	3.866	43	118.3	390_1	390
767	12.7833	5	153	3518	3.518	3867	3.867	43	116.9	390_1	390
768	12.8	5	152	3507	3.507	3863	3.863	42	115.5	390_1	390
769	12.8167	5	152	3491	3.491	3853	3.853	42	114.8	390_1	390
771	12.85	5	151	3478	3.478	3838	3.838	41	113.6	390_1	390
772	12.8667	5	151	3473	3.473	3848	3.848	41	113.2	390_1	390
774	12.9	5	151	3451	3.451	3826	3.826	41	112.7	390_1	390
776	12.9333	5	150	3433	3.433	3811	3.811	41	112.1	390_1	390
777	12.95	5	149	3398	3.398	3785	3.785	41	111.7	390_1	390
779	12.9833	5	149	3381	3.381	3783	3.783	41	112.6	390_1	390
780	13	5	148	3360	3.36	3768	3.768	41	111.8	390_1	390
781	13.0167	5	148	3337	3.337	3765	3.765	41	112.7	390_1	390
783	13.05	5	148	3293	3.293	3741	3.741	41	112.7	390_1	390
785	13.0833	5	147	3247	3.247	3685	3.685	39	109.7	390_1	390
786	13.1	5	147	3290	3.29	3739	3.739	41	113.8	390_1	390
788	13.1333	5	146	3139	3.139	3565	3.565	39	106.9	390_1	390
790	13.1667	5	145	3147	3.147	3553	3.553	38	103.3	390_1	390
791	13.1833	5	145	3173	3.173	3572	3.572	38	103.9	390_1	390
793	13.2167	5	145	3177	3.177	3570	3.57	39	104.4	390_1	390
794	13.2333	5	144	3070	3.07	3446	3.446	38	100.3	390_1	390
797	13.2833	5	144	2971	2.971	3335	3.335	36	95.8	390_1	390
798	13.3	5	143	2991	2.991	3360	3.36	35	95.9	390_1	390
800	13.3333	5	142	3224	3.224	3643	3.643	40	107	390_1	390
801	13.35	5	142	3149	3.149	3612	3.612	40	110	390_1	390
803	13.3833	5	141	3019	3.019	3514	3.514	40	109	390_1	390
805	13.4167	5	141	2909	2.909	3449	3.449	38	106.7	390_1	390
807	13.45	5	141	2786	2.786	3344	3.344	36	102.4	390_1	390
808	13.4667	5	141	2925	2.925	3518	3.518	38	109.7	390_1	390
810	13.5	5	140	2847	2.847	3461	3.461	37	108.8	390_1	390
812	13.5333	5	140	2803	2.803	3438	3.438	37	108.5	390_1	390
813	13.55	5	140	2779	2.779	3427	3.427	38	109.1	390_1	390
815	13.5833	5	139	2649	2.649	3264	3.264	35	101.6	390_1	390
817	13.6167	5	139	2633	2.633	3251	3.251	35	101.4	390_1	390
818	13.6333	5	138	2719	2.719	3376	3.376	39	109.4	390_1	390
820	13.6667	5	138	2642	2.642	3290	3.29	41	108.5	390_1	390
821	13.6833	5	138	2610	2.61	3275	3.275	41	109.4	390_1	390
823	13.7167	5	138	2579	2.579	3250	3.25	41	109.1	390_1	390
824	13.7333	5	138	2528	2.528	3185	3.185	40	106.4	390_1	390
826	13.7667	5	138	2528	2.528	3185	3.185	40	106.4	390_1	390
828	13.8	5	137	2468	2.468	3133	3.133	40	107	390_1	390
829	13.8167	5	136	2429	2.429	3089	3.089	38	105.2	390_1	390
833	13.8833	5	135	2407	2.407	3076	3.076	36	104.6	390_1	390
835	13.9167	5	134	2388	2.388	3032	3.032	33	100.7	390_1	390
837	13.95	5	132	2368	2.368	2970	2.97	32	97.3	390_1	390
839	13.9833	5	131	2326	2.326	2906	2.906	32	95.1	390_1	390
841	14.0167	5	131	2305	2.305	2872	2.872	32	93.8	390_1	390
842	14.0333	5	131	2272	2.272	2824	2.824	32	92.2	390_1	390
844	14.0667	5	131	2195	2.195	2741	2.741	33	92	390_1	390
846	14.1	5	131	2201	2.201	2752	2.752	33	92.5	390_1	390
848	14.1333	5	131	2170	2.17	2726	2.726	33	91.6	390_1	390
850	14.1667	5	131	2121	2.121	2694	2.694	33	91.8	390_1	390
852	14.2	5	130	2109	2.109	2688	2.688	33	92	390_1	390
853	14.2167	5	130	2109	2.109	2688	2.688	33	92	390_1	390
855	14.25	5	130	2104	2.104	2669	2.669	34	91.7	390_1	390
856	14.2667	5	129	2103	2.103	2667	2.667	34	91.5	390_1	390
858	14.3	5	129	2084	2.084	2633	2.633	35	90.1	390_1	390
860	14.3333	5	127	2063	2.063	2595	2.595	35	89	390_1	390
863	14.3833	5	125	2040	2.04	2552	2.552	36	87.7	390_1	390
869	14.4833	5	123	1986	1.986	2488	2.488	32	85.1	390_1	390
874	14.5667	5	120	1809	1.809	2153	2.153	24	66.2	390_1	390
876	14.6	5	118	1807	1.807	2152	2.152	24	66.2	390_1	390
878	14.6333	5	118	1859	1.859	2157	2.157	23	65.6	390_1	390
880	14.6667	5	118	1863	1.863	2137	2.137	22	65.3	390_1	390
882	14.7	5	118	1858	1.858	2114	2.114	21	64.6	390_1	390
885	14.75	5	119	1843	1.843	2063	2.063	22	63.1	390_1	390
887	14.7833	5	120	1994	1.994	2293	2.293	28	77.6	390_1	390
889	14.8167	5	121	2023	2.023	2321	2.321	28	78.3	390_1	390
890	14.8333	5	121	1945	1.945	2271	2.271	28	78.1	390_1	390
892	14.8667	5	121	1934	1.934	2233	2.233	28	76.4	390_1	390
895	14.9167	5	121	1931	1.931	2222	2.222	27	75.1	390_1	390
897	14.95	5	121	1931	1.931	2203	2.203	27	73.9	390_1	390
900	15	5	120	1950	1.95	2205	2.205	27	73.8	390_1	390
902	15.0333	5	120	1932	1.932	2162	2.162	28	72.6	390_1	390
903	15.05	5	119	1931	1.931	2149	2.149	29	71.6	390_1	390
905	15.0833	5	119	1932	1.932	2142	2.142	28	69.9	390_1	390
907	15.1167	5	118	1933	1.933	2152	2.152	27	70.2	390_1	390
909	15.15	5	117	1909	1.909	2116	2.116	29	69.8	390_1	390
912	15.2	5	116	1913	1.913	2123	2.123	28	71.3	390_1	390
916	15.2667	5	115	1820	1.82	2021	2.021	29	69.1	390_1	390
918	15.3	5	114	1929	1.929	2116	2.116	29	70.8	390_1	390
919	15.3167	5	114	1944	1.944	2123	2.123	30	71.9	390_1	390
921	15.35	5	113	1959	1.959	2142	2.142	31	74.5	390_1	390
923	15.3833	5	113	1925	1.925	2113	2.113	30	74.2	390_1	390
925	15.4167	5	113	1927	1.927	2113	2.113	31	75.1	390_1	390
927	15.45	5	114	1887	1.887	2071	2.071	33	73.7	390_1	390
928	15.4667	5	114	1901	1.901	2081	2.081	34	74.6	390_1	390
932	15.5333	5	114	1845	1.845	2051	2.051	33	74.8	390_1	390
