# Supplementary material for: On the development of diagnostic support algorithms based on CPET biosignals data via machine learning and wavelets
Source: PeerJ journal article supplement (doi:10.7717/peerj-cs.2474), 2025-01-30
Supplement: raw_data.zip [file Subject_44.xlsx]

## Sheet: Folha1
time	time	Speed	HR	VO2	VO2	VCO2	VCO2	RR	VE	ID_test	ID
	min	km/h	/min	ml/min	L/min	ml/min	L/min	/min	L/min
0	0	0	85	240	0.24	254	0.254	38	11	596_1	596
4	0.0666667	0	85	146	0.146	161	0.161	16	8.3	596_1	596
8	0.133333	0	70	247	0.247	260	0.26	38	11	596_1	596
18	0.3	0	70	225	0.225	245	0.245	10	8.8	596_1	596
27	0.45	0	88	371	0.371	435	0.435	9	13.6	596_1	596
35	0.583333	0	88	381	0.381	448	0.448	8	13.3	596_1	596
39	0.65	0	88	355	0.355	415	0.415	9	12.7	596_1	596
49	0.816667	0	88	351	0.351	398	0.398	7	11.4	596_1	596
54	0.9	0	88	376	0.376	423	0.423	7	12.1	596_1	596
60	1	0	88	366	0.366	396	0.396	8	11	596_1	596
68	1.13333	4.9	88	403	0.403	440	0.44	8	11.6	596_1	596
71	1.18333	4.9	90	369	0.369	402	0.402	9	10.8	596_1	596
73	1.21667	4.9	91	363	0.363	381	0.381	11	10.6	596_1	596
75	1.25	4.9	93	447	0.447	482	0.482	13	13.8	596_1	596
81	1.35	4.9	95	512	0.512	533	0.533	17	15.9	596_1	596
86	1.43333	4.9	98	637	0.637	653	0.653	16	17.8	596_1	596
90	1.5	4.9	100	710	0.71	744	0.744	18	20.3	596_1	596
95	1.58333	4.9	102	755	0.755	816	0.816	16	21.8	596_1	596
101	1.68333	4.9	103	746	0.746	818	0.818	13	21.1	596_1	596
104	1.73333	4.9	103	746	0.746	818	0.818	13	21.1	596_1	596
108	1.8	4.9	103	795	0.795	857	0.857	12	21.7	596_1	596
113	1.88333	4.9	103	834	0.834	903	0.903	13	23.1	596_1	596
117	1.95	4.9	102	792	0.792	854	0.854	14	21.8	596_1	596
124	2.06667	4.9	102	804	0.804	859	0.859	12	21.9	596_1	596
129	2.15	4.9	103	853	0.853	876	0.876	12	22	596_1	596
132	2.2	4.9	103	936	0.936	930	0.93	13	23.5	596_1	596
137	2.28333	4.9	104	963	0.963	954	0.954	12	23.9	596_1	596
140	2.33333	4.9	105	964	0.964	970	0.97	12	24.6	596_1	596
147	2.45	4.9	106	938	0.938	944	0.944	11	23.5	596_1	596
150	2.5	4.9	106	964	0.964	951	0.951	13	23.9	596_1	596
156	2.6	4.9	107	1020	1.02	966	0.966	15	24.1	596_1	596
160	2.66667	4.9	107	1020	1.02	974	0.974	16	24.5	596_1	596
165	2.75	4.9	108	1003	1.003	977	0.977	15	24.2	596_1	596
169	2.81667	4.9	108	1009	1.009	989	0.989	16	24.6	596_1	596
174	2.9	4.9	108	1015	1.015	1024	1.024	14	25.2	596_1	596
176	2.93333	4.9	108	1016	1.016	1024	1.024	14	25.2	596_1	596
179	2.98333	4.9	108	1019	1.019	1037	1.037	15	25.7	596_1	596
183	3.05	4.9	108	991	0.991	993	0.993	16	24.6	596_1	596
186	3.1	4.9	108	1010	1.01	1017	1.017	16	25.3	596_1	596
189	3.15	4.9	109	1052	1.052	1077	1.077	16	27	596_1	596
199	3.31667	4.9	109	1018	1.018	1043	1.043	17	26.6	596_1	596
203	3.38333	4.9	109	1002	1.002	1015	1.015	20	26.4	596_1	596
207	3.45	4.9	109	1018	1.018	1033	1.033	18	26.2	596_1	596
210	3.5	4.9	109	995	0.995	1008	1.008	17	25.5	596_1	596
216	3.6	4.9	108	998	0.998	1026	1.026	16	25.6	596_1	596
220	3.66667	4.9	108	986	0.986	1013	1.013	15	25.1	596_1	596
225	3.75	4.9	107	948	0.948	979	0.979	14	23.8	596_1	596
231	3.85	4.9	106	948	0.948	979	0.979	14	23.8	596_1	596
234	3.9	4.9	106	948	0.948	979	0.979	14	23.8	596_1	596
236	3.93333	4.9	106	953	0.953	991	0.991	13	23.3	596_1	596
239	3.98333	4.9	106	934	0.934	975	0.975	13	22.8	596_1	596
242	4.03333	4.9	107	930	0.93	954	0.954	14	22.1	596_1	596
245	4.08333	4.9	107	944	0.944	970	0.97	14	22.6	596_1	596
249	4.15	4.9	108	961	0.961	987	0.987	15	23.4	596_1	596
252	4.2	4.9	108	940	0.94	958	0.958	17	23.7	596_1	596
255	4.25	4.9	108	953	0.953	973	0.973	18	24.3	596_1	596
260	4.33333	4.9	108	951	0.951	990	0.99	16	24.7	596_1	596
265	4.41667	4.9	108	962	0.962	1008	1.008	14	24.8	596_1	596
268	4.46667	4.9	107	952	0.952	1004	1.004	15	25	596_1	596
272	4.53333	4.9	107	918	0.918	974	0.974	14	24	596_1	596
275	4.58333	4.9	107	905	0.905	953	0.953	15	23.4	596_1	596
282	4.7	4.9	107	954	0.954	1037	1.037	14	25.5	596_1	596
288	4.8	4.9	106	905	0.905	953	0.953	15	23.4	596_1	596
294	4.9	4.9	106	930	0.93	970	0.97	14	23.2	596_1	596
299	4.98333	4.9	106	929	0.929	963	0.963	14	22.7	596_1	596
305	5.08333	4.9	106	953	0.953	999	0.999	12	23.1	596_1	596
309	5.15	4.9	106	957	0.957	995	0.995	12	23.1	596_1	596
314	5.23333	4.9	107	970	0.97	1013	1.013	12	23.4	596_1	596
318	5.3	4.9	108	952	0.952	983	0.983	13	23.1	596_1	596
321	5.35	4.9	108	982	0.982	1027	1.027	12	24	596_1	596
325	5.41667	4.9	108	999	0.999	1046	1.046	13	24.7	596_1	596
330	5.5	4.9	108	1009	1.009	1067	1.067	13	24.9	596_1	596
334	5.56667	4.9	108	989	0.989	1036	1.036	15	24.7	596_1	596
337	5.61667	4.9	108	995	0.995	1045	1.045	15	24.9	596_1	596
342	5.7	4.9	108	984	0.984	1036	1.036	15	24.8	596_1	596
347	5.78333	4.9	107	974	0.974	1033	1.033	14	24.5	596_1	596
350	5.83333	4.9	107	965	0.965	1020	1.02	15	24.5	596_1	596
352	5.86667	4.9	107	936	0.936	987	0.987	15	24	596_1	596
355	5.91667	6.1	107	936	0.936	987	0.987	15	24	596_1	596
357	5.95	6.1	107	1000	1	1048	1.048	17	25.8	596_1	596
362	6.03333	6.1	108	998	0.998	1078	1.078	15	26.7	596_1	596
365	6.08333	6.1	110	1021	1.021	1104	1.104	16	27.6	596_1	596
369	6.15	6.1	112	1093	1.093	1200	1.2	17	30.1	596_1	596
372	6.2	6.1	115	1154	1.154	1294	1.294	17	32.2	596_1	596
376	6.26667	6.1	118	1225	1.225	1376	1.376	19	34.2	596_1	596
381	6.35	6.1	120	1146	1.146	1316	1.316	16	32.7	596_1	596
382	6.36667	6.1	122	1147	1.147	1316	1.316	16	32.7	596_1	596
385	6.41667	6.1	123	1250	1.25	1400	1.4	21	34.6	596_1	596
387	6.45	6.1	124	1353	1.353	1523	1.523	22	38.2	596_1	596
389	6.48333	6.1	125	1432	1.432	1608	1.608	25	41.5	596_1	596
391	6.51667	6.1	125	1483	1.483	1658	1.658	28	43.8	596_1	596
394	6.56667	6.1	125	1487	1.487	1646	1.646	29	43.5	596_1	596
398	6.63333	6.1	126	1487	1.487	1646	1.646	29	43.5	596_1	596
402	6.7	6.1	126	1399	1.399	1578	1.578	22	40.5	596_1	596
405	6.75	6.1	126	1384	1.384	1554	1.554	21	39	596_1	596
408	6.8	6.1	127	1399	1.399	1568	1.568	20	38.6	596_1	596
411	6.85	6.1	128	1398	1.398	1568	1.568	20	38.6	596_1	596
414	6.9	6.1	129	1396	1.396	1564	1.564	19	38	596_1	596
416	6.93333	7	130	1448	1.448	1615	1.615	21	39.2	596_1	596
419	6.98333	7	130	1525	1.525	1718	1.718	21	42.2	596_1	596
422	7.03333	7	131	1552	1.552	1760	1.76	21	43.1	596_1	596
424	7.06667	7	131	1547	1.547	1788	1.788	22	44	596_1	596
427	7.11667	7	132	1528	1.528	1797	1.797	22	44.1	596_1	596
430	7.16667	7	133	1504	1.504	1779	1.779	23	43.5	596_1	596
433	7.21667	7	134	1530	1.53	1797	1.797	23	44.3	596_1	596
436	7.26667	7	135	1514	1.514	1799	1.799	22	43.8	596_1	596
439	7.31667	7	136	1490	1.49	1782	1.782	21	43.2	596_1	596
442	7.36667	7	137	1478	1.478	1769	1.769	21	42.7	596_1	596
446	7.43333	7	137	1463	1.463	1755	1.755	20	41.9	596_1	596
448	7.46667	7	138	1481	1.481	1778	1.778	20	42.5	596_1	596
452	7.53333	7	138	1523	1.523	1809	1.809	20	43.1	596_1	596
454	7.56667	7	139	1513	1.513	1792	1.792	20	42.7	596_1	596
457	7.61667	7	139	1543	1.543	1830	1.83	20	43.4	596_1	596
461	7.68333	7	139	1576	1.576	1882	1.882	20	44.7	596_1	596
464	7.73333	7	139	1603	1.603	1936	1.936	20	45.8	596_1	596
467	7.78333	7	140	1614	1.614	1952	1.952	19	46	596_1	596
470	7.83333	7	140	1605	1.605	1963	1.963	19	46.3	596_1	596
473	7.88333	7	141	1605	1.605	1963	1.963	19	46.3	596_1	596
475	7.91667	7	141	1613	1.613	1977	1.977	20	46.9	596_1	596
477	7.95	8	142	1636	1.636	2013	2.013	20	47.9	596_1	596
480	8	8	142	1658	1.658	2040	2.04	21	49	596_1	596
482	8.03333	8	143	1680	1.68	2074	2.074	23	50.4	596_1	596
485	8.08333	8	143	1703	1.703	2101	2.101	24	51.5	596_1	596
488	8.13333	8	144	1707	1.707	2126	2.126	24	52.3	596_1	596
490	8.16667	8	145	1723	1.723	2146	2.146	24	52.6	596_1	596
493	8.21667	8	146	1720	1.72	2163	2.163	24	53.4	596_1	596
496	8.26667	8	147	1701	1.701	2159	2.159	23	53.1	596_1	596
498	8.3	8	148	1658	1.658	2136	2.136	24	53.1	596_1	596
500	8.33333	8	149	1677	1.677	2174	2.174	24	54	596_1	596
503	8.38333	8	150	1645	1.645	2135	2.135	24	53.1	596_1	596
505	8.41667	8	150	1707	1.707	2195	2.195	24	54.2	596_1	596
508	8.46667	8	151	1737	1.737	2227	2.227	24	55.1	596_1	596
510	8.5	8	151	1728	1.728	2201	2.201	24	54.7	596_1	596
513	8.55	8	151	1775	1.775	2251	2.251	25	55.9	596_1	596
516	8.6	8	150	1824	1.824	2302	2.302	23	56.3	596_1	596
519	8.65	8	149	1685	1.685	2147	2.147	22	53.4	596_1	596
521	8.68333	8	149	1824	1.824	2302	2.302	23	56.3	596_1	596
522	8.7	8	148	1816	1.816	2281	2.281	25	56.8	596_1	596
524	8.73333	8	148	1800	1.8	2262	2.262	27	57.5	596_1	596
526	8.76667	8	148	1836	1.836	2319	2.319	28	59.5	596_1	596
529	8.81667	8	149	1829	1.829	2365	2.365	27	61.1	596_1	596
532	8.86667	8	150	1817	1.817	2363	2.363	28	61.2	596_1	596
534	8.9	8	150	1817	1.817	2363	2.363	28	61.2	596_1	596
537	8.95	9	151	1813	1.813	2407	2.407	25	61.3	596_1	596
539	8.98333	9	151	1798	1.798	2379	2.379	25	60.3	596_1	596
541	9.01667	9	151	1799	1.799	2380	2.38	24	59.3	596_1	596
544	9.06667	9	151	1799	1.799	2379	2.379	24	59.3	596_1	596
546	9.1	9	151	1810	1.81	2354	2.354	25	58.4	596_1	596
549	9.15	9	151	1818	1.818	2360	2.36	25	58.5	596_1	596
552	9.2	9	152	1829	1.829	2375	2.375	24	59	596_1	596
554	9.23333	9	153	1829	1.829	2359	2.359	25	58.8	596_1	596
557	9.28333	9	154	1840	1.84	2380	2.38	24	59	596_1	596
560	9.33333	9	155	1860	1.86	2435	2.435	23	60.6	596_1	596
562	9.36667	9	155	1862	1.862	2418	2.418	24	59.9	596_1	596
565	9.41667	9	156	1871	1.871	2435	2.435	24	60	596_1	596
567	9.45	9	156	1884	1.884	2469	2.469	23	61.4	596_1	596
569	9.48333	9	157	1917	1.917	2510	2.51	24	62.6	596_1	596
571	9.51667	9	157	1927	1.927	2527	2.527	25	63.5	596_1	596
573	9.55	9	157	1944	1.944	2548	2.548	26	64.5	596_1	596
575	9.58333	9	157	1970	1.97	2577	2.577	29	65.3	596_1	596
577	9.61667	9	157	1969	1.969	2590	2.59	29	66.1	596_1	596
579	9.65	9	157	1985	1.985	2610	2.61	29	66.7	596_1	596
581	9.68333	9	157	1972	1.972	2603	2.603	30	67.2	596_1	596
583	9.71667	9	157	1967	1.967	2614	2.614	30	67.4	596_1	596
585	9.75	9	157	1966	1.966	2632	2.632	29	68.2	596_1	596
587	9.78333	9	157	1945	1.945	2602	2.602	29	67.5	596_1	596
590	9.83333	9	157	1937	1.937	2594	2.594	28	66.8	596_1	596
592	9.86667	9	157	1937	1.937	2603	2.603	27	66.9	596_1	596
594	9.9	9	158	1942	1.942	2607	2.607	27	67.3	596_1	596
596	9.93333	10.1	158	1963	1.963	2641	2.641	27	68.2	596_1	596
599	9.98333	10.1	159	1994	1.994	2681	2.681	27	69.1	596_1	596
600	10	10.1	159	1989	1.989	2678	2.678	27	69	596_1	596
603	10.05	10.1	160	2027	2.027	2726	2.726	29	70.7	596_1	596
605	10.0833	10.1	160	2045	2.045	2752	2.752	30	71.9	596_1	596
607	10.1167	10.1	160	2060	2.06	2772	2.772	29	72.2	596_1	596
608	10.1333	10.1	161	2074	2.074	2796	2.796	30	73.1	596_1	596
610	10.1667	10.1	161	2079	2.079	2810	2.81	30	73.6	596_1	596
612	10.2	10.1	162	2077	2.077	2810	2.81	30	74.1	596_1	596
614	10.2333	10.1	162	2077	2.077	2811	2.811	30	74.1	596_1	596
616	10.2667	10.1	162	2067	2.067	2805	2.805	30	74.1	596_1	596
618	10.3	10.1	163	2070	2.07	2807	2.807	31	74.4	596_1	596
620	10.3333	10.1	163	2085	2.085	2830	2.83	31	75.2	596_1	596
622	10.3667	10.1	164	2079	2.079	2826	2.826	31	74.9	596_1	596
624	10.4	10.1	164	2077	2.077	2816	2.816	30	74.1	596_1	596
626	10.4333	10.1	164	2070	2.07	2803	2.803	30	73.5	596_1	596
628	10.4667	10.1	164	2084	2.084	2827	2.827	30	74.1	596_1	596
630	10.5	10.1	165	2112	2.112	2856	2.856	30	74.8	596_1	596
632	10.5333	10.1	165	2124	2.124	2877	2.877	30	75.8	596_1	596
634	10.5667	10.1	165	2114	2.114	2877	2.877	30	76.2	596_1	596
636	10.6	10.1	165	2118	2.118	2893	2.893	31	76.8	596_1	596
638	10.6333	10.1	165	2131	2.131	2924	2.924	31	78	596_1	596
639	10.65	10.1	165	2150	2.15	2952	2.952	31	78.4	596_1	596
642	10.7	10.1	165	2126	2.126	2936	2.936	31	78.2	596_1	596
643	10.7167	10.1	165	2126	2.126	2936	2.936	31	78.2	596_1	596
645	10.75	10.1	166	2118	2.118	2928	2.928	32	78.2	596_1	596
647	10.7833	10.1	166	2132	2.132	2946	2.946	32	78.9	596_1	596
649	10.8167	10.1	166	2145	2.145	2972	2.972	33	79.9	596_1	596
651	10.85	10.1	166	2136	2.136	2976	2.976	32	80.2	596_1	596
653	10.8833	10.1	166	2127	2.127	2964	2.964	32	80.1	596_1	596
655	10.9167	10.1	166	2146	2.146	2996	2.996	32	80.9	596_1	596
656	10.9333	10.1	166	2175	2.175	3035	3.035	32	81.8	596_1	596
658	10.9667	11.1	166	2206	2.206	3081	3.081	32	83.5	596_1	596
659	10.9833	11.1	166	2193	2.193	3076	3.076	33	84.3	596_1	596
661	11.0167	11.1	166	2184	2.184	3070	3.07	35	84.8	596_1	596
662	11.0333	11.1	167	2192	2.192	3084	3.084	37	85.8	596_1	596
664	11.0667	11.1	167	2228	2.228	3125	3.125	37	87.2	596_1	596
665	11.0833	11.1	167	2232	2.232	3141	3.141	39	88.7	596_1	596
667	11.1167	11.1	167	2220	2.22	3133	3.133	39	89.2	596_1	596
669	11.15	11.1	168	2184	2.184	3090	3.09	39	87.8	596_1	596
671	11.1833	11.1	168	2154	2.154	3059	3.059	37	86.4	596_1	596
672	11.2	11.1	168	2183	2.183	3096	3.096	36	86.8	596_1	596
674	11.2333	11.1	169	2205	2.205	3137	3.137	36	88.1	596_1	596
676	11.2667	11.1	169	2198	2.198	3104	3.104	36	87.5	596_1	596
677	11.2833	11.1	169	2195	2.195	3095	3.095	36	86.6	596_1	596
679	11.3167	11.1	169	2192	2.192	3086	3.086	36	86.1	596_1	596
680	11.3333	11.1	169	2228	2.228	3121	3.121	38	86.8	596_1	596
682	11.3667	11.1	169	2232	2.232	3147	3.147	37	87.7	596_1	596
683	11.3833	11.1	169	2233	2.233	3167	3.167	37	88.5	596_1	596
685	11.4167	11.1	170	2224	2.224	3146	3.146	39	89.1	596_1	596
686	11.4333	11.1	170	2225	2.225	3170	3.17	39	90.3	596_1	596
688	11.4667	11.1	170	2221	2.221	3180	3.18	40	91.2	596_1	596
689	11.4833	11.1	170	2233	2.233	3201	3.201	41	93	596_1	596
690	11.5	11.1	170	2244	2.244	3219	3.219	43	94.9	596_1	596
692	11.5333	11.1	170	2273	2.273	3252	3.252	44	96.5	596_1	596
693	11.55	11.1	170	2265	2.265	3254	3.254	44	96.3	596_1	596
695	11.5833	11.1	170	2271	2.271	3271	3.271	42	96.3	596_1	596
696	11.6	11.1	170	2263	2.263	3259	3.259	43	95.9	596_1	596
698	11.6333	11.1	170	2283	2.283	3279	3.279	42	96.7	596_1	596
699	11.65	11.1	170	2285	2.285	3278	3.278	41	95.9	596_1	596
701	11.6833	11.1	170	2278	2.278	3270	3.27	39	94.3	596_1	596
703	11.7167	11.1	170	2275	2.275	3268	3.268	38	94.1	596_1	596
704	11.7333	11.1	170	2279	2.279	3259	3.259	37	93.3	596_1	596
706	11.7667	11.1	170	2280	2.28	3247	3.247	37	92	596_1	596
708	11.8	11.1	170	2294	2.294	3264	3.264	37	92.6	596_1	596
709	11.8167	11.1	170	2294	2.294	3264	3.264	37	92.6	596_1	596
711	11.85	11.1	170	2299	2.299	3264	3.264	36	92.5	596_1	596
713	11.8833	11.1	170	2301	2.301	3261	3.261	36	92.4	596_1	596
714	11.9	11.1	170	2325	2.325	3294	3.294	36	92.9	596_1	596
716	11.9333	12	170	2331	2.331	3311	3.311	36	93.9	596_1	596
717	11.95	12	171	2350	2.35	3345	3.345	37	95.7	596_1	596
719	11.9833	12	171	2367	2.367	3382	3.382	38	97.8	596_1	596
720	12	12	171	2378	2.378	3413	3.413	39	100.1	596_1	596
722	12.0333	12	171	2366	2.366	3419	3.419	41	101.9	596_1	596
723	12.05	12	171	2373	2.373	3447	3.447	41	103.2	596_1	596
724	12.0667	12	171	2371	2.371	3466	3.466	42	104.8	596_1	596
726	12.1	12	171	2380	2.38	3473	3.473	42	105.6	596_1	596
727	12.1167	12	172	2385	2.385	3493	3.493	42	106.4	596_1	596
729	12.15	12	172	2392	2.392	3518	3.518	42	107.4	596_1	596
730	12.1667	12	172	2393	2.393	3518	3.518	42	107.4	596_1	596
732	12.2	12	173	2397	2.397	3528	3.528	42	108.4	596_1	596
733	12.2167	12	173	2397	2.397	3528	3.528	42	108.4	596_1	596
734	12.2333	12	174	2389	2.389	3517	3.517	43	108.4	596_1	596
736	12.2667	12	174	2375	2.375	3508	3.508	43	108	596_1	596
737	12.2833	12	174	2380	2.38	3514	3.514	43	108.7	596_1	596
739	12.3167	12	174	2376	2.376	3508	3.508	42	107.9	596_1	596
740	12.3333	12	174	2358	2.358	3477	3.477	41	106	596_1	596
742	12.3667	12	174	2352	2.352	3452	3.452	42	103.8	596_1	596
743	12.3833	12	175	2394	2.394	3494	3.494	42	103.9	596_1	596
744	12.4	12	175	2415	2.415	3518	3.518	42	104.4	596_1	596
746	12.4333	12	175	2432	2.432	3545	3.545	42	105.7	596_1	596
747	12.45	12	175	2432	2.432	3551	3.551	42	105.5	596_1	596
749	12.4833	12	175	2425	2.425	3547	3.547	43	106.7	596_1	596
750	12.5	12	175	2442	2.442	3599	3.599	42	109.7	596_1	596
752	12.5333	12	175	2444	2.444	3612	3.612	42	110.5	596_1	596
753	12.55	12	175	2412	2.412	3599	3.599	41	111.5	596_1	596
754	12.5667	12	174	2404	2.404	3577	3.577	42	110.7	596_1	596
756	12.6	12	174	2412	2.412	3599	3.599	41	111.5	596_1	596
757	12.6167	12	174	2388	2.388	3578	3.578	42	111.7	596_1	596
759	12.65	12	175	2410	2.41	3599	3.599	42	111.3	596_1	596
760	12.6667	12	175	2425	2.425	3607	3.607	42	111.4	596_1	596
761	12.6833	12	175	2420	2.42	3593	3.593	42	110.7	596_1	596
763	12.7167	12	175	2441	2.441	3612	3.612	43	111.2	596_1	596
764	12.7333	12	175	2459	2.459	3637	3.637	43	112.2	596_1	596
766	12.7667	12	175	2459	2.459	3637	3.637	43	112.2	596_1	596
767	12.7833	12	175	2478	2.478	3669	3.669	42	113	596_1	596
769	12.8167	12	175	2476	2.476	3680	3.68	42	113.5	596_1	596
770	12.8333	12	176	2464	2.464	3675	3.675	42	113.8	596_1	596
771	12.85	12	176	2457	2.457	3673	3.673	43	115	596_1	596
773	12.8833	12	176	2457	2.457	3673	3.673	43	114.2	596_1	596
774	12.9	12	177	2405	2.405	3619	3.619	42	113.7	596_1	596
775	12.9167	12	177	2406	2.406	3620	3.62	42	113.7	596_1	596
776	12.9333	13	177	2384	2.384	3596	3.596	45	114	596_1	596
777	12.95	13	177	2379	2.379	3596	3.596	48	115.3	596_1	596
779	12.9833	13	177	2380	2.38	3610	3.61	48	116.6	596_1	596
780	13	13	177	2377	2.377	3607	3.607	50	117.1	596_1	596
781	13.0167	13	177	2434	2.434	3673	3.673	50	118.1	596_1	596
782	13.0333	13	177	2443	2.443	3685	3.685	48	118.8	596_1	596
784	13.0667	13	177	2432	2.432	3664	3.664	47	117.7	596_1	596
785	13.0833	13	177	2432	2.432	3664	3.664	47	117.7	596_1	596
786	13.1	13	177	2425	2.425	3654	3.654	47	117.6	596_1	596
787	13.1167	13	177	2427	2.427	3654	3.654	46	116.1	596_1	596
789	13.15	13	178	2422	2.422	3645	3.645	47	115.5	596_1	596
790	13.1667	13	178	2422	2.422	3643	3.643	49	114.9	596_1	596
791	13.1833	13	178	2407	2.407	3619	3.619	49	113.6	596_1	596
793	13.2167	13	178	2367	2.367	3563	3.563	50	112.4	596_1	596
794	13.2333	13	178	2374	2.374	3564	3.564	51	112.6	596_1	596
795	13.25	13	178	2384	2.384	3539	3.539	52	111.3	596_1	596
797	13.2833	13	178	2303	2.303	3426	3.426	46	106.1	596_1	596
799	13.3167	13	178	2170	2.17	3281	3.281	41	101.2	596_1	596
801	13.35	4.9	178	2037	2.037	3142	3.142	38	98.6	596_1	596
802	13.3667	4.9	178	1992	1.992	3112	3.112	36	98.3	596_1	596
804	13.4	4.9	178	2045	2.045	3190	3.19	36	98.6	596_1	596
806	13.4333	4.9	178	2042	2.042	3213	3.213	34	97.7	596_1	596
807	13.45	4.9	178	2042	2.042	3213	3.213	34	97.7	596_1	596
809	13.4833	4.9	177	2101	2.101	3288	3.288	34	98.6	596_1	596
811	13.5167	4.9	176	2217	2.217	3408	3.408	36	100.3	596_1	596
812	13.5333	4.9	175	2289	2.289	3457	3.457	37	101.2	596_1	596
814	13.5667	4.9	174	2385	2.385	3538	3.538	37	100.7	596_1	596
815	13.5833	4.9	174	2399	2.399	3542	3.542	37	102.2	596_1	596
817	13.6167	4.9	173	2383	2.383	3542	3.542	38	104.5	596_1	596
818	13.6333	4.9	172	2383	2.383	3543	3.543	38	104.5	596_1	596
820	13.6667	4.9	172	2346	2.346	3528	3.528	39	106.4	596_1	596
821	13.6833	4.9	171	2310	2.31	3513	3.513	39	107.7	596_1	596
822	13.7	4.9	171	2268	2.268	3493	3.493	40	108.7	596_1	596
824	13.7333	4.9	171	2232	2.232	3476	3.476	41	108.6	596_1	596
825	13.75	4.9	170	2213	2.213	3478	3.478	42	109	596_1	596
827	13.7833	4.9	170	2198	2.198	3460	3.46	42	108.1	596_1	596
829	13.8167	4.9	169	2174	2.174	3446	3.446	41	106.4	596_1	596
830	13.8333	4.9	169	2140	2.14	3397	3.397	40	104.5	596_1	596
833	13.8833	4.9	168	2096	2.096	3353	3.353	39	102.9	596_1	596
834	13.9	4.9	168	2045	2.045	3297	3.297	38	100.7	596_1	596
836	13.9333	4.9	167	2029	2.029	3301	3.301	37	100.4	596_1	596
837	13.95	4.9	167	2020	2.02	3287	3.287	37	99.6	596_1	596
839	13.9833	4.9	166	1972	1.972	3243	3.243	38	99.3	596_1	596
840	14	4.9	166	1962	1.962	3247	3.247	39	99.8	596_1	596
842	14.0333	4.9	165	1917	1.917	3213	3.213	38	98.3	596_1	596
844	14.0667	4.9	165	1923	1.923	3229	3.229	39	99.5	596_1	596
845	14.0833	4.9	165	1902	1.902	3221	3.221	38	99.4	596_1	596
847	14.1167	4.9	164	1855	1.855	3166	3.166	37	98.5	596_1	596
850	14.1667	4.9	164	1770	1.77	3018	3.018	37	94	596_1	596
852	14.2	4.9	164	1822	1.822	3072	3.072	35	92.1	596_1	596
853	14.2167	4.9	163	1821	1.821	3071	3.071	35	92.1	596_1	596
855	14.25	4.9	163	1853	1.853	3102	3.102	35	92.6	596_1	596
856	14.2667	4.9	162	1821	1.821	3049	3.049	36	91.3	596_1	596
859	14.3167	4.9	162	1721	1.721	2885	2.885	34	85.9	596_1	596
860	14.3333	4.9	161	1798	1.798	3016	3.016	33	89.1	596_1	596
862	14.3667	4.9	160	1894	1.894	3168	3.168	34	93.5	596_1	596
864	14.4	4.9	159	1795	1.795	3047	3.047	34	92.9	596_1	596
866	14.4333	4.9	159	1722	1.722	2960	2.96	32	90.4	596_1	596
868	14.4667	4.9	158	1670	1.67	2887	2.887	31	87.9	596_1	596
870	14.5	4.9	157	1650	1.65	2856	2.856	30	86.3	596_1	596
872	14.5333	4.9	157	1654	1.654	2862	2.862	30	86.4	596_1	596
875	14.5833	4.9	156	1622	1.622	2818	2.818	30	85.1	596_1	596
876	14.6	4.9	155	1595	1.595	2769	2.769	30	83.5	596_1	596
879	14.65	4.9	154	1536	1.536	2672	2.672	29	80.9	596_1	596
881	14.6833	4.9	154	1536	1.536	2672	2.672	29	80.9	596_1	596
884	14.7333	4.9	153	1494	1.494	2550	2.55	28	75.9	596_1	596
886	14.7667	4.9	151	1437	1.437	2432	2.432	28	72.3	596_1	596
889	14.8167	4.9	149	1353	1.353	2221	2.221	25	62.9	596_1	596
891	14.85	4.9	149	1415	1.415	2246	2.246	25	60.6	596_1	596
893	14.8833	4.9	148	1450	1.45	2276	2.276	25	61.3	596_1	596
895	14.9167	4.9	148	1575	1.575	2495	2.495	28	71	596_1	596
897	14.95	4.9	147	1549	1.549	2464	2.464	28	70.7	596_1	596
899	14.9833	4.9	148	1594	1.594	2554	2.554	30	75.6	596_1	596
900	15	4.9	149	1634	1.634	2634	2.634	30	78.6	596_1	596
902	15.0333	4.9	149	1582	1.582	2631	2.631	32	83.3	596_1	596
905	15.0833	4.9	149	1583	1.583	2632	2.632	32	83.3	596_1	596
908	15.1333	4.9	148	1386	1.386	2317	2.317	29	72.8	596_1	596
909	15.15	4.9	148	1408	1.408	2310	2.31	29	71.2	596_1	596
911	15.1833	4.9	147	1408	1.408	2319	2.319	29	71.7	596_1	596
913	15.2167	4.9	147	1398	1.398	2278	2.278	29	70.1	596_1	596
915	15.25	4.9	146	1395	1.395	2244	2.244	29	68.8	596_1	596
917	15.2833	4.9	146	1407	1.407	2234	2.234	29	68.6	596_1	596
919	15.3167	4.9	146	1528	1.528	2434	2.434	31	75.7	596_1	596
922	15.3667	4.9	145	1529	1.529	2435	2.435	31	75.7	596_1	596
924	15.4	4.9	145	1523	1.523	2443	2.443	31	76.9	596_1	596
926	15.4333	4.9	145	1499	1.499	2412	2.412	30	76	596_1	596
928	15.4667	4.9	145	1458	1.458	2356	2.356	30	74.7	596_1	596
930	15.5	4.9	145	1445	1.445	2338	2.338	30	74.1	596_1	596
933	15.55	4.9	145	1404	1.404	2262	2.262	28	71.2	596_1	596
935	15.5833	4.9	145	1392	1.392	2233	2.233	28	69.7	596_1	596
938	15.6333	4.9	144	1410	1.41	2289	2.289	27	71.6	596_1	596
940	15.6667	4.9	144	1367	1.367	2229	2.229	27	70	596_1	596
941	15.6833	4.9	143	1367	1.367	2229	2.229	27	70	596_1	596
943	15.7167	4.9	142	1357	1.357	2204	2.204	26	68.6	596_1	596
945	15.75	4.9	141	1345	1.345	2195	2.195	28	69.3	596_1	596
947	15.7833	4.9	140	1347	1.347	2215	2.215	28	70.4	596_1	596
949	15.8167	4.9	139	1324	1.324	2182	2.182	29	70.6	596_1	596
951	15.85	4.9	139	1302	1.302	2118	2.118	31	69.7	596_1	596
953	15.8833	4.9	138	1267	1.267	2056	2.056	30	68	596_1	596
955	15.9167	4.9	138	1253	1.253	2016	2.016	29	66.1	596_1	596
958	15.9667	4.9	137	1264	1.264	2029	2.029	28	65.7	596_1	596
960	16	4.9	137	1264	1.264	2029	2.029	28	65.7	596_1	596
962	16.0333	4.9	136	1241	1.241	1983	1.983	28	64.6	596_1	596
965	16.0833	4.9	136	1222	1.222	1932	1.932	28	62.8	596_1	596
968	16.1333	4.9	136	1176	1.176	1838	1.838	25	58	596_1	596
970	16.1667	4.9	136	1197	1.197	1827	1.827	26	58	596_1	596
972	16.2	4.9	136	1209	1.209	1843	1.843	26	58.5	596_1	596
973	16.2167	4.9	136	1280	1.28	1880	1.88	27	58.6	596_1	596
976	16.2667	4.9	136	1187	1.187	1709	1.709	25	54.2	596_1	596
977	16.2833	4.9	136	1121	1.121	1592	1.592	23	49.9	596_1	596
978	16.3	4.9	136	1202	1.202	1681	1.681	26	54.3	596_1	596
979	16.3167	4.9	136	1353	1.353	1868	1.868	33	62.3	596_1	596
982	16.3667	4.9	136	1340	1.34	1862	1.862	30	59.9	596_1	596
984	16.4	4.9	136	1287	1.287	1803	1.803	30	60	596_1	596
987	16.45	4.9	136	1226	1.226	1730	1.73	26	56.3	596_1	596
990	16.5	4.9	135	1294	1.294	1868	1.868	26	59.4	596_1	596
993	16.55	4.9	134	1295	1.295	1868	1.868	26	59.4	596_1	596
995	16.5833	4.9	134	1336	1.336	1908	1.908	23	58.9	596_1	596
997	16.6167	4.9	133	1300	1.3	1866	1.866	23	58	596_1	596
1000	16.6667	4.9	133	1237	1.237	1746	1.746	23	54	596_1	596
1002	16.7	4.9	133	1256	1.256	1750	1.75	23	53.9	596_1	596
1004	16.7333	4.9	132	1303	1.303	1797	1.797	24	55.8	596_1	596
1006	16.7667	4.9	132	1404	1.404	1870	1.87	27	57.1	596_1	596
1007	16.7833	4.9	131	1490	1.49	1999	1.999	33	64	596_1	596
1008	16.8	4.9	131	1332	1.332	1799	1.799	35	58.4	596_1	596
1010	16.8333	4.9	130	1200	1.2	1603	1.603	32	50.9	596_1	596
1012	16.8667	4.9	130	1334	1.334	1794	1.794	37	58	596_1	596
1014	16.9	4.9	130	1314	1.314	1801	1.801	34	58.1	596_1	596
1017	16.95	4.9	130	1271	1.271	1779	1.779	30	57.9	596_1	596
1020	17	4.9	130	1211	1.211	1719	1.719	28	56.5	596_1	596
1023	17.05	4.9	130	1197	1.197	1692	1.692	23	53.6	596_1	596
1025	17.0833	4.9	130	1254	1.254	1769	1.769	23	56.6	596_1	596
1027	17.1167	4.9	130	1291	1.291	1815	1.815	25	59.2	596_1	596
1029	17.15	4.9	129	1292	1.292	1815	1.815	25	59.2	596_1	596
1031	17.1833	4.9	129	1276	1.276	1791	1.791	25	58.9	596_1	596
1033	17.2167	4.9	129	1272	1.272	1760	1.76	28	58.1	596_1	596
1036	17.2667	4.9	129	1242	1.242	1704	1.704	28	55.4	596_1	596
1038	17.3	4.9	129	1321	1.321	1792	1.792	30	58.8	596_1	596
1041	17.35	4.9	129	1321	1.321	1791	1.791	28	58.2	596_1	596
1044	17.4	4.9	128	1327	1.327	1819	1.819	26	58.8	596_1	596
1046	17.4333	4.9	128	1301	1.301	1779	1.779	26	57.3	596_1	596
1048	17.4667	4.9	128	1266	1.266	1755	1.755	25	57	596_1	596
1050	17.5	4.9	128	1287	1.287	1764	1.764	25	56.6	596_1	596
1053	17.55	4.9	127	1287	1.287	1764	1.764	25	56.6	596_1	596
1056	17.6	4.9	127	1233	1.233	1714	1.714	25	56	596_1	596
