# Supplementary material for: On the development of diagnostic support algorithms based on CPET biosignals data via machine learning and wavelets
Source: PeerJ journal article supplement (doi:10.7717/peerj-cs.2474), 2025-01-30
Supplement: raw_data.zip [file Subject_45.xlsx]

## Sheet: Folha1
time	time	Speed	HR	VO2	VO2	VCO2	VCO2	RR	VE	ID_test	ID
	min	km/h	/min	ml/min	L/min	ml/min	L/min	/min	L/min
0	0	5	60	655	0.655	607	0.607	24	23.2	296_1	296
3	0.05	5	63	658	0.658	626	0.626	27	25.5	296_1	296
5	0.0833333	5	71	640	0.64	631	0.631	27	24.1	296_1	296
7	0.116667	5	74	648	0.648	618	0.618	25	23.6	296_1	296
10	0.166667	5	78	616	0.616	584	0.584	25	22.3	296_1	296
12	0.2	5	81	596	0.596	557	0.557	26	21.2	296_1	296
15	0.25	5	82	591	0.591	538	0.538	25	19.6	296_1	296
18	0.3	5	84	570	0.57	506	0.506	25	18.1	296_1	296
20	0.333333	5	85	573	0.573	488	0.488	24	17	296_1	296
23	0.383333	5	88	572	0.572	487	0.487	24	17	296_1	296
26	0.433333	5	90	639	0.639	531	0.531	24	18.4	296_1	296
29	0.483333	5	93	693	0.693	571	0.571	25	20.2	296_1	296
31	0.516667	5	94	772	0.772	630	0.63	23	21.9	296_1	296
33	0.55	5	95	816	0.816	662	0.662	24	23.1	296_1	296
36	0.6	5	95	843	0.843	680	0.68	24	23.7	296_1	296
39	0.65	5	95	879	0.879	713	0.713	24	24.6	296_1	296
41	0.683333	5	94	846	0.846	681	0.681	24	23.6	296_1	296
44	0.733333	5	93	907	0.907	721	0.721	24	24.5	296_1	296
47	0.783333	5	93	940	0.94	745	0.745	24	25.2	296_1	296
49	0.816667	5	94	944	0.944	742	0.742	24	25.3	296_1	296
52	0.866667	5	93	959	0.959	751	0.751	24	25.6	296_1	296
55	0.916667	5	94	1036	1.036	813	0.813	23	27.6	296_1	296
57	0.95	5	93	960	0.96	751	0.751	24	25.7	296_1	296
59	0.983333	5	95	960	0.96	751	0.751	24	25.7	296_1	296
62	1.03333	5	96	923	0.923	709	0.709	24	24.1	296_1	296
65	1.08333	5	95	879	0.879	668	0.668	25	22.6	296_1	296
68	1.13333	5	95	754	0.754	566	0.566	24	19.7	296_1	296
70	1.16667	5	96	1003	1.003	711	0.711	24	21.7	296_1	296
73	1.21667	5	96	908	0.908	652	0.652	23	21.3	296_1	296
76	1.26667	5	96	997	0.997	698	0.698	22	22.1	296_1	296
80	1.33333	5	95	1245	1.245	850	0.85	22	24.8	296_1	296
82	1.36667	5	94	1274	1.274	878	0.878	23	26.2	296_1	296
84	1.4	5	93	1457	1.457	1028	1.028	24	30.6	296_1	296
87	1.45	5	92	1438	1.438	1048	1.048	24	31.5	296_1	296
89	1.48333	5	90	1242	1.242	955	0.955	24	30.8	296_1	296
92	1.53333	5	89	1158	1.158	937	0.937	25	31.1	296_1	296
93	1.55	5	88	1160	1.16	938	0.938	25	31.1	296_1	296
96	1.6	5	88	1107	1.107	888	0.888	25	29	296_1	296
100	1.66667	5	89	1068	1.068	867	0.867	26	28.6	296_1	296
103	1.71667	5	89	1107	1.107	862	0.862	25	26.5	296_1	296
107	1.78333	5	89	1083	1.083	804	0.804	23	23.8	296_1	296
109	1.81667	5	92	1092	1.092	810	0.81	24	24	296_1	296
111	1.85	5	94	1107	1.107	794	0.794	23	23.2	296_1	296
114	1.9	5	96	1237	1.237	865	0.865	22	24.3	296_1	296
117	1.95	5	96	1334	1.334	954	0.954	22	27.6	296_1	296
119	1.98333	5	95	1424	1.424	1054	1.054	25	31.8	296_1	296
121	2.01667	5	96	1469	1.469	1149	1.149	25	37.3	296_1	296
124	2.06667	5	96	1442	1.442	1173	1.173	25	38.5	296_1	296
126	2.1	5	94	1350	1.35	1152	1.152	25	38.9	296_1	296
128	2.13333	5	94	1352	1.352	1152	1.152	25	38.9	296_1	296
131	2.18333	5	93	1270	1.27	1074	1.074	26	36	296_1	296
133	2.21667	5	92	1187	1.187	1015	1.015	26	33.9	296_1	296
136	2.26667	5	91	1156	1.156	987	0.987	25	32.5	296_1	296
138	2.3	5	90	1166	1.166	985	0.985	25	32	296_1	296
140	2.33333	5	90	1134	1.134	963	0.963	26	31.5	296_1	296
143	2.38333	5	91	1146	1.146	964	0.964	25	31.3	296_1	296
147	2.45	5	91	1112	1.112	921	0.921	25	29.1	296_1	296
150	2.5	5	91	1176	1.176	967	0.967	24	29.9	296_1	296
152	2.53333	5	92	1197	1.197	972	0.972	24	29.7	296_1	296
155	2.58333	5	95	1198	1.198	969	0.969	24	29.5	296_1	296
158	2.63333	5	96	1228	1.228	987	0.987	23	29.7	296_1	296
160	2.66667	5	96	1283	1.283	1038	1.038	23	31.8	296_1	296
163	2.71667	5	95	1233	1.233	998	0.998	23	30.4	296_1	296
165	2.75	5	94	1283	1.283	1038	1.038	23	31.8	296_1	296
168	2.8	5	92	1253	1.253	1020	1.02	24	32	296_1	296
170	2.83333	5	91	1240	1.24	1018	1.018	24	32.4	296_1	296
173	2.88333	5	89	1262	1.262	1046	1.046	24	33.8	296_1	296
175	2.91667	5.1	88	1212	1.212	1011	1.011	24	32.5	296_1	296
178	2.96667	5.1	89	1219	1.219	1033	1.033	24	33.4	296_1	296
180	3	5.1	90	1237	1.237	1066	1.066	25	35.5	296_1	296
183	3.05	5.2	90	1195	1.195	1027	1.027	25	34.4	296_1	296
185	3.08333	5.2	91	1187	1.187	1027	1.027	24	34.1	296_1	296
188	3.13333	5.3	92	1185	1.185	1033	1.033	24	34.5	296_1	296
190	3.16667	5.3	93	1179	1.179	1031	1.031	24	34	296_1	296
192	3.2	5.4	94	1179	1.179	1030	1.03	24	34	296_1	296
196	3.26667	5.4	95	1155	1.155	992	0.992	22	30.7	296_1	296
198	3.3	5.5	96	1181	1.181	997	0.997	22	29.9	296_1	296
201	3.35	5.5	98	1196	1.196	1007	1.007	22	30.2	296_1	296
203	3.38333	5.5	98	1213	1.213	1005	1.005	22	29.5	296_1	296
206	3.43333	5.6	98	1252	1.252	1023	1.023	22	29.4	296_1	296
209	3.48333	5.6	98	1300	1.3	1046	1.046	22	29.7	296_1	296
212	3.53333	5.7	98	1320	1.32	1069	1.069	23	31.8	296_1	296
215	3.58333	5.7	99	1321	1.321	1069	1.069	23	31.8	296_1	296
217	3.61667	5.8	100	1338	1.338	1094	1.094	23	33	296_1	296
220	3.66667	5.8	99	1317	1.317	1089	1.089	23	33.2	296_1	296
222	3.7	5.8	100	1343	1.343	1122	1.122	23	34.5	296_1	296
224	3.73333	5.9	102	1331	1.331	1125	1.125	24	35	296_1	296
226	3.76667	5.9	103	1310	1.31	1108	1.108	24	34.6	296_1	296
229	3.81667	6	104	1322	1.322	1117	1.117	25	34.6	296_1	296
232	3.86667	6	103	1365	1.365	1155	1.155	25	35.8	296_1	296
234	3.9	6.1	101	1319	1.319	1118	1.118	26	34.7	296_1	296
237	3.95	6.1	103	1269	1.269	1076	1.076	26	33.3	296_1	296
239	3.98333	6.1	105	1235	1.235	1042	1.042	26	32	296_1	296
241	4.01667	6.2	106	1213	1.213	1013	1.013	26	30.7	296_1	296
244	4.06667	6.2	108	1252	1.252	1033	1.033	25	30.8	296_1	296
246	4.1	6.3	109	1280	1.28	1048	1.048	25	31.1	296_1	296
249	4.15	6.3	111	1280	1.28	1048	1.048	25	31.1	296_1	296
251	4.18333	6.3	113	1375	1.375	1130	1.13	25	33.4	296_1	296
254	4.23333	6.4	113	1436	1.436	1194	1.194	25	35.2	296_1	296
256	4.26667	6.4	112	1473	1.473	1236	1.236	24	36.5	296_1	296
259	4.31667	6.5	112	1515	1.515	1286	1.286	24	37.9	296_1	296
261	4.35	6.5	113	1512	1.512	1299	1.299	24	38.4	296_1	296
264	4.4	6.5	114	1552	1.552	1345	1.345	24	39.9	296_1	296
266	4.43333	6.6	113	1546	1.546	1340	1.34	24	39.6	296_1	296
269	4.48333	6.6	113	1543	1.543	1356	1.356	24	40.1	296_1	296
271	4.51667	6.7	115	1527	1.527	1352	1.352	25	40.1	296_1	296
274	4.56667	6.7	117	1542	1.542	1373	1.373	25	40.9	296_1	296
276	4.6	6.7	120	1547	1.547	1388	1.388	25	41.2	296_1	296
279	4.65	6.8	120	1582	1.582	1424	1.424	25	42.4	296_1	296
281	4.68333	6.8	121	1558	1.558	1413	1.413	25	42.2	296_1	296
284	4.73333	6.9	121	1529	1.529	1382	1.382	25	41.2	296_1	296
286	4.76667	6.9	121	1617	1.617	1440	1.44	25	40.9	296_1	296
288	4.8	7	121	1695	1.695	1497	1.497	25	41.5	296_1	296
291	4.85	7	119	1716	1.716	1504	1.504	25	41	296_1	296
293	4.88333	7	119	1743	1.743	1516	1.516	25	41.1	296_1	296
296	4.93333	7.1	119	1743	1.743	1515	1.515	25	41.1	296_1	296
298	4.96667	7.1	119	1793	1.793	1563	1.563	26	42.6	296_1	296
300	5	7.2	120	1824	1.824	1620	1.62	25	45.1	296_1	296
303	5.05	7.2	120	1811	1.811	1659	1.659	26	48.8	296_1	296
305	5.08333	7.2	122	1774	1.774	1659	1.659	26	49.9	296_1	296
308	5.13333	7.3	123	1777	1.777	1700	1.7	25	51.4	296_1	296
310	5.16667	7.3	125	1806	1.806	1728	1.728	26	51.9	296_1	296
312	5.2	7.3	127	1795	1.795	1707	1.707	27	50.6	296_1	296
314	5.23333	7.4	128	1776	1.776	1690	1.69	26	49.7	296_1	296
316	5.26667	7.4	129	1803	1.803	1730	1.73	26	51.1	296_1	296
319	5.31667	7.5	132	1772	1.772	1697	1.697	26	49.5	296_1	296
321	5.35	7.5	132	1818	1.818	1742	1.742	26	50.3	296_1	296
324	5.4	7.5	133	1882	1.882	1796	1.796	26	51.7	296_1	296
326	5.43333	7.6	136	1889	1.889	1795	1.795	26	51.4	296_1	296
328	5.46667	7.6	138	1966	1.966	1877	1.877	25	54.2	296_1	296
330	5.5	7.7	138	2026	2.026	1935	1.935	26	56.1	296_1	296
333	5.55	7.7	136	2026	2.026	1935	1.935	26	56.1	296_1	296
335	5.58333	7.7	136	2040	2.04	1956	1.956	26	57.3	296_1	296
337	5.61667	7.8	137	2037	2.037	1975	1.975	26	58.3	296_1	296
340	5.66667	7.8	136	1986	1.986	1949	1.949	26	57.6	296_1	296
342	5.7	7.9	133	2023	2.023	1978	1.978	26	58.1	296_1	296
344	5.73333	7.9	133	1951	1.951	1912	1.912	26	55.6	296_1	296
346	5.76667	7.9	136	1924	1.924	1887	1.887	26	54.4	296_1	296
350	5.83333	8	139	1886	1.886	1856	1.856	27	53.8	296_1	296
352	5.86667	8	139	1901	1.901	1882	1.882	26	53.8	296_1	296
353	5.88333	8	142	1888	1.888	1851	1.851	28	53	296_1	296
355	5.91667	8.1	146	2024	2.024	1970	1.97	28	56.2	296_1	296
358	5.96667	8.1	147	1986	1.986	1923	1.923	28	54.3	296_1	296
360	6	8.2	147	2027	2.027	1951	1.951	28	54.4	296_1	296
362	6.03333	8.2	148	2090	2.09	2010	2.01	28	56.1	296_1	296
365	6.08333	8.2	149	2212	2.212	2132	2.132	28	60.9	296_1	296
367	6.11667	8.3	149	2159	2.159	2093	2.093	28	60.3	296_1	296
369	6.15	8.3	149	2219	2.219	2176	2.176	26	62.5	296_1	296
371	6.18333	8.3	149	2174	2.174	2160	2.16	27	61.7	296_1	296
374	6.23333	8.4	149	2157	2.157	2172	2.172	27	62.7	296_1	296
375	6.25	8.4	148	2195	2.195	2209	2.209	28	64.4	296_1	296
378	6.3	8.4	144	2185	2.185	2231	2.231	27	66.1	296_1	296
380	6.33333	8.5	141	2156	2.156	2211	2.211	27	65.7	296_1	296
382	6.36667	8.5	142	2108	2.108	2188	2.188	27	65.5	296_1	296
384	6.4	8.6	141	2078	2.078	2163	2.163	27	65.2	296_1	296
386	6.43333	8.6	139	2057	2.057	2132	2.132	28	64.3	296_1	296
389	6.48333	8.6	141	2058	2.058	2141	2.141	27	64.4	296_1	296
391	6.51667	8.7	145	2053	2.053	2135	2.135	28	63.8	296_1	296
394	6.56667	8.7	147	2039	2.039	2148	2.148	26	64.1	296_1	296
396	6.6	8.7	150	2055	2.055	2164	2.164	26	64.3	296_1	296
397	6.61667	8.8	149	2062	2.062	2160	2.16	25	63.3	296_1	296
399	6.65	8.8	150	2096	2.096	2185	2.185	26	63.2	296_1	296
401	6.68333	8.8	152	2142	2.142	2219	2.219	27	64.4	296_1	296
404	6.73333	8.9	153	2175	2.175	2233	2.233	27	64.9	296_1	296
406	6.76667	8.9	153	2174	2.174	2233	2.233	27	64.9	296_1	296
408	6.8	8.9	153	2181	2.181	2189	2.189	29	62.7	296_1	296
410	6.83333	9	153	2200	2.2	2189	2.189	28	61.9	296_1	296
412	6.86667	9	153	2243	2.243	2237	2.237	28	63.3	296_1	296
414	6.9	9	153	2254	2.254	2254	2.254	28	64.2	296_1	296
416	6.93333	9.1	157	2276	2.276	2274	2.274	28	64.8	296_1	296
418	6.96667	9.1	157	2304	2.304	2321	2.321	29	66.5	296_1	296
420	7	9.2	157	2274	2.274	2300	2.3	29	65.8	296_1	296
422	7.03333	9.2	159	2274	2.274	2300	2.3	29	65.8	296_1	296
424	7.06667	9.2	159	2263	2.263	2309	2.309	29	66.5	296_1	296
426	7.1	9.3	158	2250	2.25	2315	2.315	29	67.1	296_1	296
429	7.15	9.3	153	2239	2.239	2313	2.313	28	67.2	296_1	296
431	7.18333	9.3	153	2213	2.213	2293	2.293	27	66.8	296_1	296
433	7.21667	9.4	157	2213	2.213	2293	2.293	27	66.8	296_1	296
435	7.25	9.4	158	2238	2.238	2324	2.324	27	67.6	296_1	296
438	7.3	9.4	156	2238	2.238	2324	2.324	27	67.6	296_1	296
440	7.33333	9.5	159	2263	2.263	2335	2.335	27	67.2	296_1	296
442	7.36667	9.5	159	2274	2.274	2342	2.342	27	67.8	296_1	296
444	7.4	9.6	164	2313	2.313	2383	2.383	27	68.8	296_1	296
446	7.43333	9.6	164	2328	2.328	2404	2.404	28	69.5	296_1	296
448	7.46667	9.6	164	2324	2.324	2416	2.416	29	70.5	296_1	296
450	7.5	9.7	164	2336	2.336	2452	2.452	29	71.3	296_1	296
452	7.53333	9.7	169	2340	2.34	2483	2.483	30	73	296_1	296
454	7.56667	9.7	169	2366	2.366	2515	2.515	31	73.4	296_1	296
456	7.6	9.8	171	2361	2.361	2521	2.521	30	73.9	296_1	296
458	7.63333	9.8	170	2365	2.365	2545	2.545	31	74.9	296_1	296
460	7.66667	9.8	171	2349	2.349	2546	2.546	31	75.5	296_1	296
462	7.7	9.8	170	2350	2.35	2551	2.551	31	75.3	296_1	296
464	7.73333	9.9	167	2386	2.386	2586	2.586	32	76.6	296_1	296
465	7.75	9.9	165	2438	2.438	2632	2.632	32	77.7	296_1	296
467	7.78333	9.9	167	2450	2.45	2658	2.658	31	79.2	296_1	296
469	7.81667	10	166	2418	2.418	2627	2.627	31	77.8	296_1	296
472	7.86667	10	164	2385	2.385	2590	2.59	31	76.4	296_1	296
473	7.88333	10	164	2388	2.388	2598	2.598	31	76.7	296_1	296
475	7.91667	10.1	165	2404	2.404	2622	2.622	31	77.2	296_1	296
477	7.95	10.1	165	2386	2.386	2592	2.592	31	76.1	296_1	296
479	7.98333	10.1	165	2371	2.371	2591	2.591	31	76.6	296_1	296
481	8.01667	10.2	165	2321	2.321	2536	2.536	31	75.7	296_1	296
483	8.05	10.2	165	2289	2.289	2514	2.514	31	76.8	296_1	296
485	8.08333	10.2	168	2303	2.303	2532	2.532	32	76.9	296_1	296
486	8.1	10.3	170	2305	2.305	2538	2.538	32	77.3	296_1	296
489	8.15	10.3	173	2298	2.298	2537	2.537	32	77.8	296_1	296
491	8.18333	10.3	176	2286	2.286	2535	2.535	31	77.8	296_1	296
492	8.2	10.4	176	2286	2.286	2535	2.535	31	77.8	296_1	296
494	8.23333	10.4	176	2316	2.316	2567	2.567	31	78.5	296_1	296
496	8.26667	10.4	174	2345	2.345	2604	2.604	32	79.2	296_1	296
498	8.3	10.4	174	2347	2.347	2617	2.617	31	80.2	296_1	296
500	8.33333	10.5	174	2349	2.349	2642	2.642	32	81.6	296_1	296
501	8.35	10.5	174	2355	2.355	2677	2.677	33	83.5	296_1	296
503	8.38333	10.5	172	2376	2.376	2724	2.724	33	85.2	296_1	296
505	8.41667	10.6	176	2387	2.387	2777	2.777	34	87.8	296_1	296
506	8.43333	10.6	179	2384	2.384	2810	2.81	35	90.4	296_1	296
508	8.46667	10.6	179	2363	2.363	2777	2.777	35	89.3	296_1	296
509	8.48333	10.6	180	2364	2.364	2811	2.811	36	90.6	296_1	296
510	8.5	10.7	178	2383	2.383	2864	2.864	39	92.9	296_1	296
512	8.53333	10.7	178	2368	2.368	2845	2.845	39	91.6	296_1	296
514	8.56667	10.7	182	2371	2.371	2827	2.827	38	90.5	296_1	296
516	8.6	10.7	180	2374	2.374	2812	2.812	37	88.2	296_1	296
517	8.61667	10.8	176	2380	2.38	2793	2.793	37	86.8	296_1	296
519	8.65	10.8	175	2393	2.393	2815	2.815	38	88.3	296_1	296
521	8.68333	10.8	172	2399	2.399	2813	2.813	37	87.8	296_1	296
522	8.7	10.9	172	2396	2.396	2806	2.806	37	87.8	296_1	296
524	8.73333	10.9	172	2434	2.434	2839	2.839	37	89	296_1	296
525	8.75	10.9	166	2430	2.43	2858	2.858	38	90	296_1	296
527	8.78333	10.9	168	2444	2.444	2887	2.887	39	91.9	296_1	296
528	8.8	11	173	2411	2.411	2860	2.86	37	91	296_1	296
530	8.83333	11	178	2347	2.347	2796	2.796	38	88.9	296_1	296
532	8.86667	11	181	2403	2.403	2828	2.828	39	88.8	296_1	296
534	8.9	11	184	2421	2.421	2855	2.855	40	90	296_1	296
535	8.91667	11.1	181	2436	2.436	2845	2.845	39	88.5	296_1	296
537	8.95	11.1	185	2468	2.468	2861	2.861	38	88.1	296_1	296
539	8.98333	11.1	184	2458	2.458	2855	2.855	36	87.5	296_1	296
540	9	11.2	182	2530	2.53	2929	2.929	36	89.6	296_1	296
542	9.03333	11.2	182	2542	2.542	2977	2.977	37	92.5	296_1	296
543	9.05	11.2	182	2578	2.578	3019	3.019	39	94.3	296_1	296
545	9.08333	11.2	185	2561	2.561	3005	3.005	38	93.9	296_1	296
546	9.1	11.3	189	2575	2.575	3036	3.036	39	95	296_1	296
548	9.13333	11.3	185	2536	2.536	3006	3.006	40	94.2	296_1	296
549	9.15	11.3	186	2588	2.588	3069	3.069	40	96	296_1	296
551	9.18333	11.3	185	2551	2.551	3059	3.059	41	96.8	296_1	296
552	9.2	11.4	182	2510	2.51	3017	3.017	39	95	296_1	296
554	9.23333	11.4	182	2469	2.469	2971	2.971	38	93.5	296_1	296
556	9.26667	11.4	182	2436	2.436	2949	2.949	38	93.5	296_1	296
557	9.28333	11.4	184	2392	2.392	2909	2.909	37	92.3	296_1	296
559	9.31667	11.5	187	2393	2.393	2912	2.912	36	92	296_1	296
561	9.35	11.5	192	2393	2.393	2912	2.912	36	92	296_1	296
562	9.36667	11.5	194	2405	2.405	2906	2.906	36	90.6	296_1	296
564	9.4	11.6	197	2404	2.404	2906	2.906	36	90.6	296_1	296
566	9.43333	11.6	197	2434	2.434	2938	2.938	36	90.6	296_1	296
567	9.45	11.6	193	2461	2.461	2952	2.952	35	90.2	296_1	296
569	9.48333	11.6	190	2459	2.459	2932	2.932	36	89.2	296_1	296
571	9.51667	11.7	192	2452	2.452	2944	2.944	36	90.3	296_1	296
573	9.55	5	189	2440	2.44	2953	2.953	36	89.9	296_1	296
575	9.58333	5	186	2422	2.422	2938	2.938	35	89	296_1	296
576	9.6	5	184	2407	2.407	2927	2.927	35	88.8	296_1	296
578	9.63333	5	188	2378	2.378	2908	2.908	34	88.9	296_1	296
580	9.66667	5	187	2380	2.38	2909	2.909	33	87.7	296_1	296
582	9.7	5	186	2379	2.379	2908	2.908	33	87.7	296_1	296
584	9.73333	5	184	2389	2.389	2919	2.919	32	87.2	296_1	296
586	9.76667	5	182	2379	2.379	2891	2.891	32	85.8	296_1	296
588	9.8	5	182	2399	2.399	2932	2.932	32	86.7	296_1	296
590	9.83333	5	182	2419	2.419	2974	2.974	32	87.5	296_1	296
592	9.86667	5	178	2408	2.408	2978	2.978	32	86.8	296_1	296
593	9.88333	5	175	2425	2.425	3008	3.008	32	87.6	296_1	296
595	9.91667	5	176	2453	2.453	3053	3.053	32	90.4	296_1	296
597	9.95	5	173	2448	2.448	3076	3.076	33	92.2	296_1	296
599	9.98333	5	173	2443	2.443	3088	3.088	33	92.7	296_1	296
601	10.0167	5	173	2399	2.399	3067	3.067	33	91.5	296_1	296
602	10.0333	5	172	2377	2.377	3062	3.062	33	91.8	296_1	296
605	10.0833	5	170	2377	2.377	3062	3.062	33	91.8	296_1	296
606	10.1	5	167	2351	2.351	3050	3.05	32	91.5	296_1	296
608	10.1333	5	162	2331	2.331	3040	3.04	32	90.9	296_1	296
610	10.1667	5	162	2315	2.315	3022	3.022	32	90.5	296_1	296
612	10.2	5	160	2318	2.318	3042	3.042	33	91.9	296_1	296
614	10.2333	5	157	2261	2.261	2990	2.99	33	91.3	296_1	296
615	10.25	5	155	2228	2.228	2966	2.966	33	90.9	296_1	296
617	10.2833	5	154	2229	2.229	2966	2.966	33	90.9	296_1	296
619	10.3167	5	154	2171	2.171	2915	2.915	32	89.7	296_1	296
621	10.35	5	152	2119	2.119	2856	2.856	31	87.7	296_1	296
623	10.3833	5	149	2079	2.079	2814	2.814	31	86.9	296_1	296
626	10.4333	5	146	2036	2.036	2779	2.779	30	85.8	296_1	296
628	10.4667	5	142	1993	1.993	2736	2.736	29	84.7	296_1	296
630	10.5	5	142	1991	1.991	2728	2.728	30	83.7	296_1	296
632	10.5333	5	139	1919	1.919	2625	2.625	28	79.2	296_1	296
634	10.5667	5	138	1841	1.841	2516	2.516	28	76.6	296_1	296
636	10.6	5	137	1849	1.849	2529	2.529	29	76.9	296_1	296
638	10.6333	5	136	1831	1.831	2503	2.503	29	76.8	296_1	296
640	10.6667	5	136	1771	1.771	2417	2.417	29	73.9	296_1	296
642	10.7	5	134	1809	1.809	2481	2.481	32	78	296_1	296
644	10.7333	5	135	1757	1.757	2437	2.437	32	78.4	296_1	296
645	10.75	5	138	1790	1.79	2510	2.51	32	82.2	296_1	296
647	10.7833	5	138	1836	1.836	2601	2.601	33	86.9	296_1	296
649	10.8167	5	137	1801	1.801	2565	2.565	33	86.1	296_1	296
651	10.85	5	136	1783	1.783	2550	2.55	33	85.4	296_1	296
653	10.8833	5	136	1783	1.783	2550	2.55	33	85.4	296_1	296
655	10.9167	5	135	1797	1.797	2541	2.541	33	84.5	296_1	296
656	10.9333	5	132	1793	1.793	2524	2.524	33	84.4	296_1	296
658	10.9667	5	127	1768	1.768	2523	2.523	33	84.9	296_1	296
660	11	5	124	1744	1.744	2467	2.467	33	83	296_1	296
662	11.0333	5	121	1697	1.697	2413	2.413	33	82.8	296_1	296
664	11.0667	5	120	1659	1.659	2361	2.361	32	82.7	296_1	296
666	11.1	5	120	1625	1.625	2339	2.339	31	83.1	296_1	296
668	11.1333	5	121	1583	1.583	2280	2.28	31	81.2	296_1	296
670	11.1667	5	121	1543	1.543	2222	2.222	30	79.6	296_1	296
672	11.2	5	121	1540	1.54	2202	2.202	30	77.7	296_1	296
674	11.2333	5	121	1526	1.526	2189	2.189	30	76.4	296_1	296
677	11.2833	5	121	1532	1.532	2169	2.169	30	74.9	296_1	296
679	11.3167	5	121	1525	1.525	2127	2.127	28	72.9	296_1	296
681	11.35	5	121	1540	1.54	2136	2.136	29	73.4	296_1	296
683	11.3833	5	120	1522	1.522	2085	2.085	28	71.2	296_1	296
685	11.4167	5	121	1508	1.508	2036	2.036	28	68.9	296_1	296
687	11.45	5	122	1494	1.494	1993	1.993	28	67.6	296_1	296
689	11.4833	5	122	1482	1.482	1954	1.954	27	66.2	296_1	296
692	11.5333	5	122	1489	1.489	1948	1.948	26	65.7	296_1	296
694	11.5667	5	120	1495	1.495	1942	1.942	27	65.9	296_1	296
696	11.6	5	117	1495	1.495	1942	1.942	27	65.9	296_1	296
698	11.6333	5	119	1490	1.49	1931	1.931	27	66.7	296_1	296
700	11.6667	5	117	1486	1.486	1935	1.935	27	67.7	296_1	296
703	11.7167	5	114	1475	1.475	1918	1.918	27	67.3	296_1	296
705	11.75	5	111	1435	1.435	1881	1.881	26	66.9	296_1	296
708	11.8	5	113	1401	1.401	1844	1.844	26	66.2	296_1	296
710	11.8333	5	115	1356	1.356	1774	1.774	26	63.6	296_1	296
712	11.8667	5	114	1355	1.355	1774	1.774	26	63.6	296_1	296
714	11.9	5	113	1380	1.38	1783	1.783	26	63.2	296_1	296
717	11.95	5	112	1381	1.381	1757	1.757	26	61.9	296_1	296
719	11.9833	5	113	1419	1.419	1765	1.765	26	62	296_1	296
721	12.0167	5	113	1436	1.436	1764	1.764	27	62.6	296_1	296
724	12.0667	5	112	1439	1.439	1758	1.758	27	62.6	296_1	296
726	12.1	5	111	1455	1.455	1774	1.774	26	63.3	296_1	296
729	12.15	5	111	1420	1.42	1731	1.731	26	61.7	296_1	296
731	12.1833	5	111	1403	1.403	1716	1.716	26	60.8	296_1	296
733	12.2167	5	111	1379	1.379	1683	1.683	25	59.4	296_1	296
736	12.2667	5	111	1376	1.376	1660	1.66	25	58.1	296_1	296
739	12.3167	5	109	1367	1.367	1628	1.628	25	56.5	296_1	296
741	12.35	5	108	1381	1.381	1633	1.633	25	57.1	296_1	296
743	12.3833	5	109	1354	1.354	1600	1.6	24	56.3	296_1	296
747	12.45	5	109	1346	1.346	1569	1.569	24	55.3	296_1	296
749	12.4833	5	109	1346	1.346	1561	1.561	24	54.7	296_1	296
752	12.5333	5	109	1381	1.381	1578	1.578	24	54.5	296_1	296
754	12.5667	5	110	1356	1.356	1533	1.533	24	52.9	296_1	296
757	12.6167	5	109	1364	1.364	1538	1.538	24	53.1	296_1	296
